# Supplementary material for: Decoding non-human mammalian adaptive signatures of 2.3.4.4b H5N1 to assess its human adaptive potential
Source: Research Square preprint supplement (doi:10.21203/rs.3.rs-5157982/v1), 2024-10-04
Supplement: Supplementary file 1 [file 5a48d9cfcd9d92d7c7621ade.xlsx]

## Sheet: Sheet1
We gratefully acknowledge the authors, originating and submitting laboratories of the sequences from GISAID’s EpiFlu™ Database on which this research is based. The list is detailed below.
All submitters of data may be contacted directly via www.gisaid.org
Segment ID	Segment	Country	Collection date	Isolate-ID	Isolate name	Originating Lab	Submitting Lab	Authors
EPI2837132	HA	Finland	2023-Sep-20	EPI_ISL_18618768	A/mink/Finland/3079/2023	Finnish Food Authority	Finnish Food Authority	Kauppinen, Ari; Kareinen, Lauri; Tammiranta, Niina; Kantala, Tuija; Fusaro, Alice; Gadd, Tuija
EPI2837124	HA	Finland	2023-Sep-20	EPI_ISL_18618767	A/mink/Finland/3078/2023	Finnish Food Authority	Finnish Food Authority	Kauppinen, Ari; Kareinen, Lauri; Tammiranta, Niina; Kantala, Tuija; Fusaro, Alice; Gadd, Tuija
EPI2837114	HA	Finland	2023-Sep-20	EPI_ISL_18618766	A/mink/Finland/3081/2023	Finnish Food Authority	Finnish Food Authority	Kauppinen, Ari; Kareinen, Lauri; Tammiranta, Niina; Kantala, Tuija; Fusaro, Alice; Gadd, Tuija
EPI2837104	HA	Finland	2023-Sep-20	EPI_ISL_18618701	A/mink/Finland/3076/2023	Finnish Food Authority	Finnish Food Authority	Kauppinen, Ari; Kareinen, Lauri; Tammiranta, Niina; Kantala, Tuija; Fusaro, Alice; Gadd, Tuija
EPI2837080	HA	Finland	2023-Aug-05	EPI_ISL_18618377	A/mink/Finland/688/2023	Finnish Food Authority	Finnish Food Authority	Kauppinen, Ari; Kareinen, Lauri; Tammiranta, Niina; Kantala, Tuija; Fusaro, Alice; Gadd, Tuija
EPI2760294	HA	Finland	2023-Jul-17	EPI_ISL_18321746	A/raccoon_dog/Finland/552_23VIR6928-5/2023	Finnish Food Authority	Istituto Zooprofilattico Sperimentale Delle Venezie	Gadd, T.; Tammiranta, N; Kantala, K.; Nokireki, T.; Pastori, A.; Zecchin, B.; Fusaro, A.; Schivo, A.; Salviato, A.; Palumbo, E.; Giussani, E.; Monne, I.; Terregino, C.
EPI2755522	HA	Finland	2023-Aug-05	EPI_ISL_18292966	A/mink/Finland/710/2023	Finnish Food Authority	Finnish Food Authority	Kauppinen, Ari; Kareinen, Lauri; Tammiranta, Niina; Kantala, Tuija; Fusaro, Alice; Giussani, Edoardo; Gadd, Tuija
EPI2755514	HA	Finland	2023-Aug-05	EPI_ISL_18292965	A/mink/Finland/709/2023	Finnish Food Authority	Finnish Food Authority	Kauppinen, Ari; Kareinen, Lauri; Tammiranta, Niina; Kantala, Tuija; Fusaro, Alice; Giussani, Edoardo; Gadd, Tuija
EPI2755411	HA	Finland	2023-Jul-03	EPI_ISL_18292952	A/mink/Finland/506/2023	Finnish Food Authority	Finnish Food Authority	Kauppinen, Ari; Kareinen, Lauri; Tammiranta, Niina; Kantala, Tuija; Fusaro, Alice; Galiano, Monica; Ikonen, Niina; Lindh, Erika; Gadd, Tuija
EPI2513415	HA	Canada	2022-Dec-26	EPI_ISL_17494319	A/American crow/PEI/FAV-0019-01/2022	Atlantic Veterinary College, University of Prince Edward Island	Canadian Food Inspection Agency	Parma, L; Hisanaga, T; Xu, W; Alkie, T; Fisher, M; Lung, O; Yason, C; Jones, M; Berhane, Y
EPI2197232	HA	Finland	2021-Sep-01	EPI_ISL_15518270	A/otter/Finland/2860_21VIR9619-5/2021	Finnish Food Authority	Istituto Zooprofilattico Sperimentale Delle Venezie	Tammiranta, N.;Kantala, T.;Laamanen, I.;Gadd, T.;Zecchin, B.;Fusaro, A.;Schivo, A.;Salviato, A.;Palumbo, E.;Milani, A.;Giussani, E.;Pastori, A.;Monne, I.;Terregino, C.
EPI1987258	HA	Netherlands	2022-Feb-13	EPI_ISL_10220432	A/badger/Netherlands/22003078-004/2022	Wageningen Bioveterinary Research	Wageningen Bioveterinary Research	Beerens, Nancy; Harders, Frank; Pritz-Verschuren, Sylvia; Roose, Marit; Venema, Sandra; Germeraad, Evelien; Engelsma, Marc; Heutink, Rene
EPI1987234	HA	Netherlands	2022-Feb-09	EPI_ISL_10220429	A/polecat/Netherlands/22002792-005/2022	Wageningen Bioveterinary Research	Wageningen Bioveterinary Research	Beerens, Nancy; Harders, Frank; Pritz-Verschuren, Sylvia; Roose, Marit; Venema, Sandra; Germeraad, Evelien; Engelsma, Marc; Heutink, Rene
EPI1981004	HA	Netherlands	2022-Jan-24	EPI_ISL_9616266	A/polecat/Netherlands/22002047-001/2022	Wageningen Bioveterinary Research	Wageningen Bioveterinary Research	Beerens, Nancy; Harders, Frank; Pritz-Verschuren, Sylvia; Roose, Marit; Venema, Sandra; Germeraad, Evelien; Engelsma, Marc; Heutink, Rene
EPI2780162	HA	Korea, Republic of	2023-Jul-04	EPI_ISL_18102701	A/feline/South Korea/SNU-02/2023			K,Lee; M,Yeom; T,Vu; Q,Do; W,NA; M,Lee; D,Jeong; D,Cheon; D,Song
EPI2780151	HA	Korea, Republic of	2023-Jul-04	EPI_ISL_18102700	A/feline/South Korea/SNU-01/2023			K,Lee; M,Yeom; T,Vu; Q,Do; W,NA; M,Lee; D,Jeong; D,Cheon; D,Song
EPI2649355	HA	Poland	2023-Jun-17	EPI_ISL_18033408	A/caracal/Poland/H303-P/2023	National Veterinary Research Institut Poland, PIWet-PIB	National Veterinary Research Institut Poland, PIWet-PIB	Swieton,Edyta;Tarasiuk,Karolina;Wyrostek,Krzysztof;Stys-Fijol,Natalia;Domanska-Blicharz,Katarzyna
EPI2597244	HA	Peru	2023-Feb-08	EPI_ISL_17805999	A/lion/Peru/AIS0554/2023			Cruz,C.D., Conza,L.B., Espejo,V., Troncos,G., Perez,D.R., Marcelo,O.L., Schilling,M.; Tinoco,Y.
EPI3260245	HA	United States	2024-Jan-30	EPI_ISL_19094507	A/mountain lion/Montana/24_005908-001/2024	United States Department of Agriculture, Agricultural Research Service, National Animal Disease Center	United States Department of Agriculture, Agricultural Research Service, National Animal Disease Center	T.,Nguyen; C.,Hutter; A.,Markin; M.,Thomas; K.,Lantz; M.L.,Killian; G.M.,Janzen; S.,Vijendran; S.,Wagle; B.,Inderski; D.R.,Magstadt; G.,Li; D.G.,Diel; E.A.,Frye; K.M.,Dimitrov; A.K.,Swinford; A.C.,Thompson; K.R.,Snevik; D.L.,Suarez; E.,Spackman; S.M.,Lakin; S.,C; K.R.,Johnson; A.L.,Baker; Robbe-S.,Austerman; M.K.,Torchetti; Anderson,T.K.
EPI3260237	HA	United States	2024-Apr-01	EPI_ISL_19094506	A/mountain lion/Montana/24_010315-001/2024	United States Department of Agriculture, Agricultural Research Service, National Animal Disease Center	United States Department of Agriculture, Agricultural Research Service, National Animal Disease Center	T.,Nguyen; C.,Hutter; A.,Markin; M.,Thomas; K.,Lantz; M.L.,Killian; G.M.,Janzen; S.,Vijendran; S.,Wagle; B.,Inderski; D.R.,Magstadt; G.,Li; D.G.,Diel; E.A.,Frye; K.M.,Dimitrov; A.K.,Swinford; A.C.,Thompson; K.R.,Snevik; D.L.,Suarez; E.,Spackman; S.M.,Lakin; S.,C; K.R.,Johnson; A.L.,Baker; Robbe-S.,Austerman; M.K.,Torchetti; Anderson,T.K.
EPI3260220	HA	United States	2024-Mar-11	EPI_ISL_19094504	A/skunk/Montana/24_007939-001/2024	United States Department of Agriculture, Agricultural Research Service, National Animal Disease Center	United States Department of Agriculture, Agricultural Research Service, National Animal Disease Center	T.,Nguyen; C.,Hutter; A.,Markin; M.,Thomas; K.,Lantz; M.L.,Killian; G.M.,Janzen; S.,Vijendran; S.,Wagle; B.,Inderski; D.R.,Magstadt; G.,Li; D.G.,Diel; E.A.,Frye; K.M.,Dimitrov; A.K.,Swinford; A.C.,Thompson; K.R.,Snevik; D.L.,Suarez; E.,Spackman; S.M.,Lakin; S.,C; K.R.,Johnson; A.L.,Baker; Robbe-S.,Austerman; M.K.,Torchetti; Anderson,T.K.
EPI3260196	HA	United States	2024-Feb-23	EPI_ISL_19094501	A/skunk/Washington/24_005959-001/2024	United States Department of Agriculture, Agricultural Research Service, National Animal Disease Center	United States Department of Agriculture, Agricultural Research Service, National Animal Disease Center	T.,Nguyen; C.,Hutter; A.,Markin; M.,Thomas; K.,Lantz; M.L.,Killian; G.M.,Janzen; S.,Vijendran; S.,Wagle; B.,Inderski; D.R.,Magstadt; G.,Li; D.G.,Diel; E.A.,Frye; K.M.,Dimitrov; A.K.,Swinford; A.C.,Thompson; K.R.,Snevik; D.L.,Suarez; E.,Spackman; S.M.,Lakin; S.,C; K.R.,Johnson; A.L.,Baker; Robbe-S.,Austerman; M.K.,Torchetti; Anderson,T.K.
EPI3260188	HA	United States	2024-Feb-23	EPI_ISL_19094500	A/skunk/Washington/24_005959-002/2024	United States Department of Agriculture, Agricultural Research Service, National Animal Disease Center	United States Department of Agriculture, Agricultural Research Service, National Animal Disease Center	T.,Nguyen; C.,Hutter; A.,Markin; M.,Thomas; K.,Lantz; M.L.,Killian; G.M.,Janzen; S.,Vijendran; S.,Wagle; B.,Inderski; D.R.,Magstadt; G.,Li; D.G.,Diel; E.A.,Frye; K.M.,Dimitrov; A.K.,Swinford; A.C.,Thompson; K.R.,Snevik; D.L.,Suarez; E.,Spackman; S.M.,Lakin; S.,C; K.R.,Johnson; A.L.,Baker; Robbe-S.,Austerman; M.K.,Torchetti; Anderson,T.K.
EPI3260180	HA	United States	2024-Feb-23	EPI_ISL_19094499	A/skunk/Washington/24_005959-003/2024	United States Department of Agriculture, Agricultural Research Service, National Animal Disease Center	United States Department of Agriculture, Agricultural Research Service, National Animal Disease Center	T.,Nguyen; C.,Hutter; A.,Markin; M.,Thomas; K.,Lantz; M.L.,Killian; G.M.,Janzen; S.,Vijendran; S.,Wagle; B.,Inderski; D.R.,Magstadt; G.,Li; D.G.,Diel; E.A.,Frye; K.M.,Dimitrov; A.K.,Swinford; A.C.,Thompson; K.R.,Snevik; D.L.,Suarez; E.,Spackman; S.M.,Lakin; S.,C; K.R.,Johnson; A.L.,Baker; Robbe-S.,Austerman; M.K.,Torchetti; Anderson,T.K.
EPI3259740	HA	United States	2024-Mar-19	EPI_ISL_19094443	A/feline/Montana/24-009038-001/2024	National Veterinary Services Laboratories - USDA	National Veterinary Services Laboratories - USDA	Aufderhar,Matthew;Franzen,Kerrie;Killian,Mary;Lantz,Kristina;Stuber,Tod;Hicks,Jessica;Norris,Cameron
EPI3158803	HA	United States	2024-Feb-23	EPI_ISL_19014400	A/skunk/New Mexico/24-006483-001/2024	National Veterinary Services Laboratories - USDA	National Veterinary Services Laboratories - USDA	Aufderhar,Matthew;Franzen,Kerrie;Love,Emily;Killian,Mary;Lantz,Kristina;Stuber,Tod;Hicks,Jessica;Norris,Cameron
EPI2906701	HA	France	2022-Nov-01	EPI_ISL_18750109	A/tibetan blue bear/France/CHUT-0007R2/2022	Centre Hospitalier Universitaire de Toulouse	Centre Hospitalier Universitaire de Toulouse	Bessiere,P., Gaide,N., Crispo,M., Dirat,M., Croville,G., Le Loc'h,G.; Guerin,J.-L.
EPI2895495	HA	United States	2023-Aug-19	EPI_ISL_18737559	A/harbor seal/Washington/23-025744-002/2023	National Veterinary Services Laboratories - USDA	National Veterinary Services Laboratories - USDA	Franzen,Kerrie;Love,Emily;Ozella,Mikaela;Killian,Mary;Lantz,Kristina;Stuber,Tod;Hicks,Jessica;Norris,Cameron
EPI2895487	HA	United States	2023-Aug-19	EPI_ISL_18737558	A/harbor seal/Washington/23-025744-001/2023	National Veterinary Services Laboratories - USDA	National Veterinary Services Laboratories - USDA	Franzen,Kerrie;Love,Emily;Ozella,Mikaela;Killian,Mary;Lantz,Kristina;Stuber,Tod;Hicks,Jessica;Norris,Cameron
EPI2895023	HA	United States	2023-Aug-13	EPI_ISL_18731638	A/harbor seal/Washington/23-027069-002/2023	National Veterinary Services Laboratories - USDA	National Veterinary Services Laboratories - USDA	Franzen,Kerrie;Love,Emily;Ozella,Mikaela;Killian,Mary;Lantz,Kristina;Stuber,Tod;Hicks,Jessica;Norris,Cameron
EPI2894999	HA	United States	2023-Aug-25	EPI_ISL_18731622	A/harbor seal/Washington/23-025991-001/2023	National Veterinary Services Laboratories - USDA	National Veterinary Services Laboratories - USDA	Franzen,Kerrie;Love,Emily;Ozella,Mikaela;Killian,Mary;Lantz,Kristina;Stuber,Tod;Hicks,Jessica;Norris,Cameron
EPI2894991	HA	United States	2023-Aug-29	EPI_ISL_18731621	A/harbor seal/Washington/23-026504-002/2023	National Veterinary Services Laboratories - USDA	National Veterinary Services Laboratories - USDA	Franzen,Kerrie;Love,Emily;Ozella,Mikaela;Killian,Mary;Lantz,Kristina;Stuber,Tod;Hicks,Jessica;Norris,Cameron
EPI2894983	HA	United States	2023-Aug-29	EPI_ISL_18731620	A/harbor seal/Washington/23-026504-001/2023	National Veterinary Services Laboratories - USDA	National Veterinary Services Laboratories - USDA	Franzen,Kerrie;Love,Emily;Ozella,Mikaela;Killian,Mary;Lantz,Kristina;Stuber,Tod;Hicks,Jessica;Norris,Cameron
EPI2856648	HA	Canada	2023-Apr-20	EPI_ISL_18665592	A/Striped_Skunk/BC/AIVPHL-1083/2023	B.C. Centre for Disease Control	Public Health Agency of Canada	Himsworth, Chelsea; Prystajecky,Natalie; Tyson,John; Jassem,Agatha; Kuchinski,Kevin; Coombe, Michelle; Lee,Tracy; Azana,Rob; Fung,Janet; Chan,Michael; Cheung,Branco; Caleta,Jessica; Tsang,Frankie; Yang,Kevin; Russell,Shannon; Zlosnik,James; Hoang,Linda
EPI2856624	HA	Canada	2023-Apr-20	EPI_ISL_18665588	A/Striped_Skunk/BC/AIVPHL-1082/2023	B.C. Centre for Disease Control	Public Health Agency of Canada	Himsworth, Chelsea; Prystajecky,Natalie; Tyson,John; Jassem,Agatha; Kuchinski,Kevin; Coombe, Michelle; Lee,Tracy; Azana,Rob; Fung,Janet; Chan,Michael; Cheung,Branco; Caleta,Jessica; Tsang,Frankie; Yang,Kevin; Russell,Shannon; Zlosnik,James; Hoang,Linda
EPI2856601	HA	Canada	2023-Apr-20	EPI_ISL_18665585	A/Striped_Skunk/BC/AIVPHL-1080/2023	B.C. Centre for Disease Control	Public Health Agency of Canada	Himsworth, Chelsea; Prystajecky,Natalie; Tyson,John; Jassem,Agatha; Kuchinski,Kevin; Coombe, Michelle; Lee,Tracy; Azana,Rob; Fung,Janet; Chan,Michael; Cheung,Branco; Caleta,Jessica; Tsang,Frankie; Yang,Kevin; Russell,Shannon; Zlosnik,James; Hoang,Linda
EPI2856227	HA	Canada	2023-Mar-09	EPI_ISL_18665535	A/Striped_Skunk/BC/AIVPHL-977/2023	B.C. Centre for Disease Control	Public Health Agency of Canada	Himsworth, Chelsea; Prystajecky,Natalie; Tyson,John; Jassem,Agatha; Kuchinski,Kevin; Coombe, Michelle; Lee,Tracy; Azana,Rob; Fung,Janet; Chan,Michael; Cheung,Branco; Caleta,Jessica; Tsang,Frankie; Yang,Kevin; Russell,Shannon; Zlosnik,James; Hoang,Linda
EPI2856203	HA	Canada	2023-Mar-09	EPI_ISL_18665532	A/Striped_Skunk/BC/AIVPHL-976/2023	B.C. Centre for Disease Control	Public Health Agency of Canada	Himsworth, Chelsea; Prystajecky,Natalie; Tyson,John; Jassem,Agatha; Kuchinski,Kevin; Coombe, Michelle; Lee,Tracy; Azana,Rob; Fung,Janet; Chan,Michael; Cheung,Branco; Caleta,Jessica; Tsang,Frankie; Yang,Kevin; Russell,Shannon; Zlosnik,James; Hoang,Linda
EPI2856180	HA	Canada	2023-Mar-06	EPI_ISL_18665529	A/Striped_Skunk/BC/AIVPHL-975/2023	B.C. Centre for Disease Control	Public Health Agency of Canada	Himsworth, Chelsea; Prystajecky,Natalie; Tyson,John; Jassem,Agatha; Kuchinski,Kevin; Coombe, Michelle; Lee,Tracy; Azana,Rob; Fung,Janet; Chan,Michael; Cheung,Branco; Caleta,Jessica; Tsang,Frankie; Yang,Kevin; Russell,Shannon; Zlosnik,James; Hoang,Linda
EPI2856157	HA	Canada	2023-Mar-06	EPI_ISL_18665526	A/Striped_Skunk/BC/AIVPHL-972/2023	B.C. Centre for Disease Control	Public Health Agency of Canada	Himsworth, Chelsea; Prystajecky,Natalie; Tyson,John; Jassem,Agatha; Kuchinski,Kevin; Coombe, Michelle; Lee,Tracy; Azana,Rob; Fung,Janet; Chan,Michael; Cheung,Branco; Caleta,Jessica; Tsang,Frankie; Yang,Kevin; Russell,Shannon; Zlosnik,James; Hoang,Linda
EPI2816120	HA	Denmark	2023-Apr-29	EPI_ISL_18594303	A_red_fox_Denmark_08303-1.01_2023-04-29	Statens Serumm Institute	Statens Serum Institute	Hjulsager,C;Liang,Y
EPI2512582	HA	Canada	2022-Jun-14	EPI_ISL_17478645	A/Black Bear/QC/FAV-0902/2022	Laboratoire de sant√© animale Minist√®re de l'Agriculture, des P√™cheries et de l'A	Canadian Food Inspection Agency	Koziuk, J; Hisanaga, T; Xu, W; Alkie, T; Lung, O; Fisher, M; Nadeau, M.S; Lair, S; Berhane, Y
EPI2512515	HA	Canada	2022-Jun-24	EPI_ISL_17478584	A/Black Bear/QC/FAV-0935/2022	Laboratoire de sant√© animale Minist√®re de l'Agriculture, des P√™cheries et de l'A	Canadian Food Inspection Agency	Koziuk, J; Hisanaga, T; Xu, W; Alkie, T; Lung, O; Fisher, M; Nadeau, M.S; Lair, S; Berhane, Y
EPI2509907	HA	United Kingdom	2022-Jun-19	EPI_ISL_17465835	A/harbour_seal/Scotland/054948/2022	Animal and Plant Health Agency (APHA)	Animal and Plant Health Agency (APHA)
EPI2509899	HA	United Kingdom	2023-Feb-20	EPI_ISL_17465834	A/common_dolphin/England/040499/2023	Animal and Plant Health Agency (APHA)	Animal and Plant Health Agency (APHA)
EPI2509891	HA	United Kingdom	2023-Feb-20	EPI_ISL_17465833	A/common_dolphin/Wales/040498/2023	Animal and Plant Health Agency (APHA)	Animal and Plant Health Agency (APHA)
EPI2509883	HA	United Kingdom	2023-Feb-06	EPI_ISL_17465832	A/harbour_porpoise/England/040497/2023	Animal and Plant Health Agency (APHA)	Animal and Plant Health Agency (APHA)
EPI2507003	HA	United States	2023-Jan-27	EPI_ISL_17424646	A/striped skunk/Kansas/W23-094/2023	St. Jude Center of Excellence for Influenza Research and Response - CEIRR Influenza Data Processing and Communication Center	St. Jude Center of Excellence for Influenza Research and Response - CEIRR Influenza Data Processing and Communication Center	Poulson,R., Stallknecht,D., Rubrum,A., Jeevan,T., Walker,D. and Webby,R.
EPI2506851	HA	United States	2022-Jul-07	EPI_ISL_17424627	A/harbor seal/Maine/MME-185-ns/2022			Fauquier,D.; Doughty,L.A.; Rubrum,A.; Jeevan,T.; Walker,D.; Webby,R.
EPI2506843	HA	United States	2022-Jun-24	EPI_ISL_17424626	A/harbor seal/Maine/MME-117-ns/2022			Fauquier,D.; Doughty,L.A.; Rubrum,A.; Jeevan,T.; Walker,D.; Webby,R.
EPI2506835	HA	United States	2022-Jul-02	EPI_ISL_17424625	A/harbor seal/Maine/MME-150-L/2022			Fauquier,D.; Doughty,L.A.; Rubrum,A.; Jeevan,T.; Walker,D.; Webby,R.
EPI2506827	HA	United States	2022-Jul-07	EPI_ISL_17424624	A/harbor seal/Maine/MME-185-L/2022	St. Jude Center of Excellence for Influenza Research and Response - CEIRR Influenza Data Processing and Communication Center	St. Jude Center of Excellence for Influenza Research and Response - CEIRR Influenza Data Processing and Communication Center	Fauquier,D., Doughty,L.A., Rubrum,A., Jeevan,T., Walker,D. and Webby,R.
EPI2506819	HA	United States	2022-Jul-02	EPI_ISL_17424623	A/harbor seal/Maine/MME-150-ns/2022			Fauquier,D.; Doughty,L.A.; Rubrum,A.; Jeevan,T.; Walker,D.; Webby,R.
EPI2506812	HA	United States	2022-Jul-02	EPI_ISL_17424622	A/harbor seal/Maine/MME-147-L/2022	St. Jude Center of Excellence for Influenza Research and Response - CEIRR Influenza Data Processing and Communication Center	St. Jude Center of Excellence for Influenza Research and Response - CEIRR Influenza Data Processing and Communication Center	Fauquier,D., Doughty,L.A., Rubrum,A., Jeevan,T., Walker,D. and Webby,R.
EPI2473784	HA	United States	2022-Jul-22	EPI_ISL_17260689	A/skunk/Idaho/22-023547-001/2022	National Veterinary Services Laboratories - USDA	National Veterinary Services Laboratories - USDA	Chinh,Thanh;Franzen,Kerrie;Love,Emily;Killian,Mary;Koster,Leo;Lantz,Kristina;Stuber,Tod;Hicks,Jessica;Norris,Cameron
EPI2473776	HA	United States	2022-Jul-06	EPI_ISL_17260688	A/raccoon/Michigan/22-021733-010/2022	National Veterinary Services Laboratories - USDA	National Veterinary Services Laboratories - USDA	Chinh,Thanh;Franzen,Kerrie;Love,Emily;Killian,Mary;Koster,Leo;Lantz,Kristina;Stuber,Tod;Hicks,Jessica;Norris,Cameron
EPI2473706	HA	United States	2022-Apr-14	EPI_ISL_17260683	A/fisher/Wisconsin/22-019946-001/2022	National Veterinary Services Laboratories - USDA	National Veterinary Services Laboratories - USDA	Chinh,Thanh;Franzen,Kerrie;Love,Emily;Killian,Mary;Koster,Leo;Lantz,Kristina;Stuber,Tod;Hicks,Jessica;Norris,Cameron
EPI2473690	HA	United States	2022-Jun-07	EPI_ISL_17260682	A/skunk/Washington/22-019274-004/2022	National Veterinary Services Laboratories - USDA	National Veterinary Services Laboratories - USDA	Chinh,Thanh;Franzen,Kerrie;Love,Emily;Killian,Mary;Koster,Leo;Lantz,Kristina;Stuber,Tod;Hicks,Jessica;Norris,Cameron
EPI2473662	HA	United States	2022-Jun-06	EPI_ISL_17260680	A/skunk/Idaho/22-018976-004/2022	National Veterinary Services Laboratories - USDA	National Veterinary Services Laboratories - USDA	Chinh,Thanh;Franzen,Kerrie;Love,Emily;Killian,Mary;Koster,Leo;Lantz,Kristina;Stuber,Tod;Hicks,Jessica;Norris,Cameron
EPI2473592	HA	United States	2022-May-03	EPI_ISL_17260675	A/coyote/Michigan/22-017507-005/2022	National Veterinary Services Laboratories - USDA	National Veterinary Services Laboratories - USDA	Chinh,Thanh;Franzen,Kerrie;Love,Emily;Killian,Mary;Koster,Leo;Lantz,Kristina;Stuber,Tod;Hicks,Jessica;Norris,Cameron
EPI2473536	HA	United States	2022-May-25	EPI_ISL_17260671	A/Virginia opossum/Iowa/22-016780-003/2022	National Veterinary Services Laboratories - USDA	National Veterinary Services Laboratories - USDA	Chinh,Thanh;Franzen,Kerrie;Love,Emily;Killian,Mary;Koster,Leo;Lantz,Kristina;Stuber,Tod;Hicks,Jessica;Norris,Cameron
EPI2274966	HA	Canada	2022-May-30	EPI_ISL_16367971	A/Striped Skunk/SK/FAV-0824-01/2022	Western College of Veterinary Medicine, University of Saskatchewan	Canadian Food Inspection Agency
EPI2260734	HA	United States	2022-Jan-01	EPI_ISL_16271848	A/black bear/Alaska/22-036396-001/2022	National Veterinary Services Laboratories - USDA	National Veterinary Services Laboratories - USDA	Chinh,Thanh;Love, Emily;Franzen,Kerrie;Killian,Mary;Koster,Leo;Lantz,Kristina;Stuber,Tod;Hicks,Jessica
EPI2260630	HA	United States	2022-Nov-04	EPI_ISL_16271835	A/striped skunk/Idaho/22-037165-002/2022	National Veterinary Services Laboratories - USDA	National Veterinary Services Laboratories - USDA	Chinh,Thanh;Love, Emily;Franzen,Kerrie;Killian,Mary;Koster,Leo;Lantz,Kristina;Stuber,Tod;Hicks,Jessica
EPI2257436	HA	United States	2022-Mar-30	EPI_ISL_16212269	A/bottlenose dolphin/Florida/UFTt2203/2022			Murawski,A.; Allison,A.; Ossiboff,R.; Fabrizio,T.; Jeevan,T.; Mukherjee,N.; Killian,M.L.; Torchetti,M.; Walsh,M.; Webby,R.
EPI2235584	HA	Canada	2022-May-18	EPI_ISL_16003268	A/Skunk/MB/FAV-470/2022	Manitoba Agriculture	Canadian Food Inspection Agency	Alkie, Tamiru; Cox, Sherri; Pople, Neil; Xu, Wanhong; Hisanaga, Tamiko; Suderman, Suderman; Koziuk, Janice; Kruczkiewicz, Peter; Nguyen, Hoang Hai; Fisher, Mathew; Lung, Oliver; Berhane, Yohannes
EPI2182143	HA	United States	2022-Mar-30	EPI_ISL_15078255	A/dolphin/Florida/22-025319-002/2022	National Veterinary Services Laboratories - USDA	National Veterinary Services Laboratories - USDA	Chinh,Thanh;Love, Emily;Franzen,Kerrie;Killian,Mary;Koster,Leo;Lantz,Kristina;Stuber,Tod;Hicks,Jessica
EPI2182135	HA	United States	2022-Jun-07	EPI_ISL_15078254	A/skunk/Washington/22-019274-001/2022	National Veterinary Services Laboratories - USDA	National Veterinary Services Laboratories - USDA	Chinh,Thanh;Love, Emily;Franzen,Kerrie;Killian,Mary;Koster,Leo;Lantz,Kristina;Stuber,Tod;Hicks,Jessica
EPI2182119	HA	United States	2022-Jun-08	EPI_ISL_15078252	A/raccoon/Washington/22-018406-002/2022	National Veterinary Services Laboratories - USDA	National Veterinary Services Laboratories - USDA	Chinh,Thanh;Love, Emily;Franzen,Kerrie;Killian,Mary;Koster,Leo;Lantz,Kristina;Stuber,Tod;Hicks,Jessica
EPI2182103	HA	United States	2022-May-25	EPI_ISL_15078250	A/Virginia opossum/Iowa/22-016780-001/2022	National Veterinary Services Laboratories - USDA	National Veterinary Services Laboratories - USDA	Chinh,Thanh;Love, Emily;Franzen,Kerrie;Killian,Mary;Koster,Leo;Lantz,Kristina;Stuber,Tod;Hicks,Jessica
EPI2182087	HA	United States	2022-May-24	EPI_ISL_15078248	A/bobcat/Wisconsin/22-016051-001/2022	National Veterinary Services Laboratories - USDA	National Veterinary Services Laboratories - USDA	Chinh,Thanh;Love, Emily;Franzen,Kerrie;Killian,Mary;Koster,Leo;Lantz,Kristina;Stuber,Tod;Hicks,Jessica
EPI2181752	HA	United States	2022-Mar-30	EPI_ISL_15069397	A/bottlenose dolphin/Florida/UFTt2203/2022	University of Florida, College of Veterinary Medicine	St. Jude Children's Research Hospital	Murawski, Allison; Allison, Andrew; Ossiboff, Robert; Fabrizio, Thomas; Jeevan, Trushar; Killian, Mary Lea; Torchetti, Mia; Walsh, Michael; Webby, Richard
EPI2158648	HA	United Kingdom	2022-Jan-01	EPI_ISL_14864642	A/otter/Scotland/M100366/2022	Animal and Plant Health Agency (APHA)	Animal and Plant Health Agency (APHA)
EPI2158640	HA	United Kingdom	2022-Jan-01	EPI_ISL_14864641	A/otter/Scotland/M100839/2022	Animal and Plant Health Agency (APHA)	Animal and Plant Health Agency (APHA)
EPI2109943	HA	Japan	2022-Apr-01	EPI_ISL_14070455	A/tanuki/Hokkaido/1/2022	Graduate School of Veterinary Medicine, Hokkaido University	Graduate School of Veterinary Medicine, Hokkaido University	Yoshihiro, Sakoda; Takahiro, Hiono; Norikazu, Isoda
EPI2557227	HA	Netherlands	2023-Jan-01	EPI_ISL_17672783	A/grey seal/Netherlands/30448/2023	Tier√§rztliche Hochschule Hannover	Friedrich-Loeffler-Institut
EPI2557211	HA	Netherlands	2023-Jan-01	EPI_ISL_17672781	A/grey seal/Netherlands/302579/2023	Tier√§rztliche Hochschule Hannover	Friedrich-Loeffler-Institut
EPI2455328	HA	Germany	2023-Feb-27	EPI_ISL_17167249	A/grey seal/Germany-SH/AI01973/2023	Landeslabor Schleswig-Holstein	Friedrich-Loeffler-Institut
EPI2398403	HA	United Kingdom	2022-Mar-12	EPI_ISL_16904553	A/Harbour_Seal/Scotland/162919/2022	Animal and Plant Health Agency (APHA)	Animal and Plant Health Agency (APHA)
EPI2310444	HA	United States	2022-Jul-15	EPI_ISL_16632542	A/harbor seal/Maine/22-025072-002/2022	Cummings School of Veterinary Medicine at Tufts University	Cummings School of Veterinary Medicine at Tufts University	Chinh,Thanh; Franzen,Kerrie; Love,Emily; Killian,Mary; Lantz,Kristina; Hicks,Jessica; Norris, Cameron; Stuber,Tod; Sawatzki, Kaitlin; Puryear, Wendy; Foss, Alexa; Doughty,Linda; Runstadler, Jonathan
EPI2310436	HA	United States	2022-Jul-09	EPI_ISL_16632541	A/harbor seal/Maine/22-022528-008/2022	Cummings School of Veterinary Medicine at Tufts University	Cummings School of Veterinary Medicine at Tufts University	Chinh,Thanh; Franzen,Kerrie; Love,Emily; Killian,Mary; Lantz,Kristina; Hicks,Jessica; Norris, Cameron; Stuber,Tod; Sawatzki, Kaitlin; Puryear, Wendy; Foss, Alexa; Doughty,Linda; Runstadler, Jonathan
EPI2310428	HA	United States	2022-Jul-09	EPI_ISL_16632540	A/harbor seal/Maine/22-022528-006/2022	Cummings School of Veterinary Medicine at Tufts University	Cummings School of Veterinary Medicine at Tufts University	Chinh,Thanh; Franzen,Kerrie; Love,Emily; Killian,Mary; Lantz,Kristina; Hicks,Jessica; Norris, Cameron; Stuber,Tod; Sawatzki, Kaitlin; Puryear, Wendy; Foss, Alexa; Doughty,Linda; Runstadler, Jonathan
EPI2310420	HA	United States	2022-Jul-08	EPI_ISL_16632539	A/harbor seal/Maine/22-022528-003/2022	Cummings School of Veterinary Medicine at Tufts University	Cummings School of Veterinary Medicine at Tufts University	Chinh,Thanh; Franzen,Kerrie; Love,Emily; Killian,Mary; Lantz,Kristina; Hicks,Jessica; Norris, Cameron; Stuber,Tod; Sawatzki, Kaitlin; Puryear, Wendy; Foss, Alexa; Doughty,Linda; Runstadler, Jonathan
EPI2110525	HA	United States	2022-Jun-29	EPI_ISL_14098924	A/harbor seal/Maine/22-020983-007/2022	National Veterinary Services Laboratories - USDA	National Veterinary Services Laboratories - USDA	Chinh,Thanh;Franzen,Kerrie;Love, Emily;Killian,Mary;Koster,Leo;Lantz,Kristina;Torchetti,Mia;Stuber,Tod;Hicks,Jessica
EPI2110517	HA	United States	2022-Jun-29	EPI_ISL_14098923	A/harbor seal/Maine/22-020983-006/2022	National Veterinary Services Laboratories - USDA	National Veterinary Services Laboratories - USDA	Chinh,Thanh;Franzen,Kerrie;Love, Emily;Killian,Mary;Koster,Leo;Lantz,Kristina;Torchetti,Mia;Stuber,Tod;Hicks,Jessica
EPI2110509	HA	United States	2022-Jun-29	EPI_ISL_14098922	A/grey seal/Maine/22-020983-003/2022	National Veterinary Services Laboratories - USDA	National Veterinary Services Laboratories - USDA	Chinh,Thanh;Franzen,Kerrie;Love, Emily;Killian,Mary;Koster,Leo;Lantz,Kristina;Torchetti,Mia;Stuber,Tod;Hicks,Jessica
EPI2110501	HA	United States	2022-Jun-29	EPI_ISL_14098921	A/harbor seal/Maine/22-020983-002/2022	National Veterinary Services Laboratories - USDA	National Veterinary Services Laboratories - USDA	Chinh,Thanh;Franzen,Kerrie;Love, Emily;Killian,Mary;Koster,Leo;Lantz,Kristina;Torchetti,Mia;Stuber,Tod;Hicks,Jessica
EPI2110493	HA	United States	2022-Jun-29	EPI_ISL_14098920	A/harbor seal/Maine/22-020983-001/2022	National Veterinary Services Laboratories - USDA	National Veterinary Services Laboratories - USDA	Chinh,Thanh;Franzen,Kerrie;Love, Emily;Killian,Mary;Koster,Leo;Lantz,Kristina;Torchetti,Mia;Stuber,Tod;Hicks,Jessica
EPI2110485	HA	United States	2022-Jun-27	EPI_ISL_14098919	A/harbor seal/Maine/22-020455-005/2022	National Veterinary Services Laboratories - USDA	National Veterinary Services Laboratories - USDA	Chinh,Thanh;Franzen,Kerrie;Love, Emily;Killian,Mary;Koster,Leo;Lantz,Kristina;Torchetti,Mia;Stuber,Tod;Hicks,Jessica
EPI2110477	HA	United States	2022-Jun-26	EPI_ISL_14098918	A/harbor seal/Maine/22-020455-004/2022	National Veterinary Services Laboratories - USDA	National Veterinary Services Laboratories - USDA	Chinh,Thanh;Franzen,Kerrie;Love, Emily;Killian,Mary;Koster,Leo;Lantz,Kristina;Torchetti,Mia;Stuber,Tod;Hicks,Jessica
EPI2110469	HA	United States	2022-Jun-22	EPI_ISL_14098917	A/harbor seal/Maine/22-020455-003/2022	National Veterinary Services Laboratories - USDA	National Veterinary Services Laboratories - USDA	Chinh,Thanh;Franzen,Kerrie;Love, Emily;Killian,Mary;Koster,Leo;Lantz,Kristina;Torchetti,Mia;Stuber,Tod;Hicks,Jessica
EPI2110461	HA	United States	2022-Jun-24	EPI_ISL_14098916	A/harbor seal/Maine/22-020455-002/2022	National Veterinary Services Laboratories - USDA	National Veterinary Services Laboratories - USDA	Chinh,Thanh;Franzen,Kerrie;Love, Emily;Killian,Mary;Koster,Leo;Lantz,Kristina;Torchetti,Mia;Stuber,Tod;Hicks,Jessica
EPI2110453	HA	United States	2022-Jun-24	EPI_ISL_14098915	A/harbor seal/Maine/22-020455-001/2022	National Veterinary Services Laboratories - USDA	National Veterinary Services Laboratories - USDA	Chinh,Thanh;Franzen,Kerrie;Love, Emily;Killian,Mary;Koster,Leo;Lantz,Kristina;Torchetti,Mia;Stuber,Tod;Hicks,Jessica
EPI2641352	HA	Finland	2023-Jul-10	EPI_ISL_18011099	A/mink/Finland/512-23/2023	Finnish Food Authority	Finnish Institute for Health and Welfare, THL	Tuija,Kantala; Alice,Fusaro; Tuija,Gadd; Monica,Galiano; Niina,Ikonen; Lauri,Kareinen; Ari,Kauppinen; Erika,Lindh
EPI2291518	HA	Spain	2022-Oct-26	EPI_ISL_16507096	A/mink/Spain/22VIR12774-14_3869-3/2022	Istituto Zooprofilattico Sperimentale delle Venezie, EU/OIE/Reference Laboratory and FAO Reference Centre for AI and ND	Istituto Zooprofilattico Sperimentale Delle Venezie	Ruano,M.J.; Rocha,A.; Sanchez,A.; Aguero,M.; Pastori, A.; Zecchin, B.; Fusaro, A.; Schivo, A.; Salviato, A.; Palumbo, E.; Giussani, E.; Monne, I.; Terregino, C.
EPI2291510	HA	Spain	2022-Oct-26	EPI_ISL_16507095	A/mink/Spain/22VIR12774-13_3869-2/2022	Istituto Zooprofilattico Sperimentale delle Venezie, EU/OIE/Reference Laboratory and FAO Reference Centre for AI and ND	Istituto Zooprofilattico Sperimentale Delle Venezie	Ruano,M.J.; Rocha,A.; Sanchez,A.; Aguero,M.; Pastori, A.; Zecchin, B.; Fusaro, A.; Schivo, A.; Salviato, A.; Palumbo, E.; Giussani, E.; Monne, I.; Terregino, C.
EPI2236192	HA	Canada	2022-May-19	EPI_ISL_16013982	A/Wild Mink/ON/FAV-0529-01/2022	Ontario Veterinary College, University of Guelph	Canadian Food Inspection Agency	Alkie, Tamiru; Cox, Sherri; Ojkic, Davor; Stevens, Brian; Xu, Wanhong; Hisanaga, Tamiko; Suderman, Suderman; Koziuk, Janice; Kruczkiewicz, Peter; Nguyen, Hoang Hai; Fisher, Mathew; Lung, Oliver; Berhane, Yohannes
EPI2220621	HA	Spain	2022-Oct-18	EPI_ISL_15878542	A/Mink/Spain/3691-3_22VIR10586-9/2022	Laboratorio Central de Veterinaria	Istituto Zooprofilattico Sperimentale delle Venezie	Ruano, M.J.; Rocha, A.; Sanchez, A.; Aguero, M; Barbierato, G.; Zecchin, B.; Fusaro, A.; Schivo, A.; Salviato, A.; Palumbo, E.; Giussani, E.; Pastori, A.; Monne, I.; Terregino, C.
EPI2220613	HA	Spain	2022-Oct-18	EPI_ISL_15878541	A/Mink/Spain/3691-2_22VIR10586-8/2022	Laboratorio Central de Veterinaria	Istituto Zooprofilattico Sperimentale delle Venezie	Ruano, M.J.; Rocha, A.; Sanchez, A.; Aguero, M; Barbierato, G.; Zecchin, B.; Fusaro, A.; Schivo, A.; Salviato, A.; Palumbo, E.; Giussani, E.; Pastori, A.; Monne, I.; Terregino, C.
EPI2220605	HA	Spain	2022-Oct-18	EPI_ISL_15878540	A/Mink/Spain/3691-10_22VIR10586-11/2022	Laboratorio Central de Veterinaria	Istituto Zooprofilattico Sperimentale delle Venezie	Ruano, M.J.; Rocha, A.; Sanchez, A.; Aguero, M; Barbierato, G.; Zecchin, B.; Fusaro, A.; Schivo, A.; Salviato, A.; Palumbo, E.; Giussani, E.; Pastori, A.; Monne, I.; Terregino, C.
EPI2220597	HA	Spain	2022-Oct-18	EPI_ISL_15878539	A/Mink/Spain/3691-8_22VIR10586-10/2022	Laboratorio Central de Veterinaria	Istituto Zooprofilattico Sperimentale delle Venezie	Ruano, M.J.; Rocha, A.; Sanchez, A.; Aguero, M; Barbierato, G.; Zecchin, B.; Fusaro, A.; Schivo, A.; Salviato, A.; Palumbo, E.; Giussani, E.; Pastori, A.; Monne, I.; Terregino, C.
EPI2649365	HA	Poland	2023-Jan-01	EPI_ISL_18033418	A/domestic_cat/Poland/H322-M/2023	National Veterinary Research Institut Poland, PIWet-PIB	National Veterinary Research Institut Poland, PIWet-PIB	Swieton,Edyta;Tarasiuk,Karolina;Wyrostek,Krzysztof;Stys-Fijol,Natalia;Domanska-Blicharz,Katarzyna
EPI2649364	HA	Poland	2023-Jan-01	EPI_ISL_18033417	A/domestic_cat/Poland/H321-M/2023	National Veterinary Research Institut Poland, PIWet-PIB	National Veterinary Research Institut Poland, PIWet-PIB	Swieton,Edyta;Tarasiuk,Karolina;Wyrostek,Krzysztof;Stys-Fijol,Natalia;Domanska-Blicharz,Katarzyna
EPI2649363	HA	Poland	2023-Jan-01	EPI_ISL_18033416	A/domestic_cat/Poland/H320-M/2023	National Veterinary Research Institut Poland, PIWet-PIB	National Veterinary Research Institut Poland, PIWet-PIB	Swieton,Edyta;Tarasiuk,Karolina;Wyrostek,Krzysztof;Stys-Fijol,Natalia;Domanska-Blicharz,Katarzyna
EPI2649362	HA	Poland	2023-Jan-01	EPI_ISL_18033415	A/domestic_cat/Poland/H319-M/2023	National Veterinary Research Institut Poland, PIWet-PIB	National Veterinary Research Institut Poland, PIWet-PIB	Swieton,Edyta;Tarasiuk,Karolina;Wyrostek,Krzysztof;Stys-Fijol,Natalia;Domanska-Blicharz,Katarzyna
EPI2649361	HA	Poland	2023-Jul-06	EPI_ISL_18033414	A/domestic_cat/Poland/H314-W3/2023	National Veterinary Research Institut Poland, PIWet-PIB	National Veterinary Research Institut Poland, PIWet-PIB	Swieton,Edyta;Tarasiuk,Karolina;Wyrostek,Krzysztof;Stys-Fijol,Natalia;Domanska-Blicharz,Katarzyna
EPI2649360	HA	Poland	2023-Jan-01	EPI_ISL_18033413	A/domestic_cat/Poland/H304-M2/2023	National Veterinary Research Institut Poland, PIWet-PIB	National Veterinary Research Institut Poland, PIWet-PIB	Swieton,Edyta;Tarasiuk,Karolina;Wyrostek,Krzysztof;Stys-Fijol,Natalia;Domanska-Blicharz,Katarzyna
EPI2649359	HA	Poland	2023-Jan-01	EPI_ISL_18033412	A/domestic_cat/Poland/H304-M1/2023	National Veterinary Research Institut Poland, PIWet-PIB	National Veterinary Research Institut Poland, PIWet-PIB	Swieton,Edyta;Tarasiuk,Karolina;Wyrostek,Krzysztof;Stys-Fijol,Natalia;Domanska-Blicharz,Katarzyna
EPI2649358	HA	Poland	2023-Jan-01	EPI_ISL_18033411	A/domestic_cat/Poland/H299-N/2023	National Veterinary Research Institut Poland, PIWet-PIB	National Veterinary Research Institut Poland, PIWet-PIB	Swieton,Edyta;Tarasiuk,Karolina;Wyrostek,Krzysztof;Stys-Fijol,Natalia;Domanska-Blicharz,Katarzyna
EPI2649356	HA	Poland	2023-Jan-01	EPI_ISL_18033409	A/domestic_cat/Poland/H275k3-M/2023	National Veterinary Research Institut Poland, PIWet-PIB	National Veterinary Research Institut Poland, PIWet-PIB	Swieton,Edyta;Tarasiuk,Karolina;Wyrostek,Krzysztof;Stys-Fijol,Natalia;Domanska-Blicharz,Katarzyna
EPI2616230	HA	Poland	2023-Jun-26	EPI_ISL_17971998	A/domestic_cat/Poland/H264-G/2023(H5N1)	National Veterinary Research Institut Poland, PIWet-PIB	National Veterinary Research Institut Poland, PIWet-PIB	Swieton, E.;Domanska-Blicharz, K.;Tarasiuk, K.; Wyrostek, K.;Stys-Fijol, N.
EPI2616214	HA	Poland	2023-Jun-25	EPI_ISL_17971996	A/domestic_cat/Poland/H271-W/2023(H5N1)	National Veterinary Research Institut Poland, PIWet-PIB	National Veterinary Research Institut Poland, PIWet-PIB	Swieton, E.;Domanska-Blicharz, K.;Tarasiuk, K.; Wyrostek, K.;Stys-Fijol, N.
EPI2616206	HA	Poland	2023-Jun-25	EPI_ISL_17971995	A/domestic_cat/Poland/H270-W/2023(H5N1)	National Veterinary Research Institut Poland, PIWet-PIB	National Veterinary Research Institut Poland, PIWet-PIB	Swieton, E.;Domanska-Blicharz, K.;Tarasiuk, K.; Wyrostek, K.;Stys-Fijol, N.
EPI2616190	HA	Poland	2023-Jun-19	EPI_ISL_17971993	A/domestic_cat/Poland/H266-W/2023(H5N1)	National Veterinary Research Institut Poland, PIWet-PIB	National Veterinary Research Institut Poland, PIWet-PIB	Swieton, E.;Domanska-Blicharz, K.;Tarasiuk, K.; Wyrostek, K.;Stys-Fijol, N.
EPI2616182	HA	Poland	2023-Jun-26	EPI_ISL_17971992	A/domestic_cat/Poland/H263-G/2023(H5N1)	National Veterinary Research Institut Poland, PIWet-PIB	National Veterinary Research Institut Poland, PIWet-PIB	Swieton, E.;Domanska-Blicharz, K.;Tarasiuk, K.; Wyrostek, K.;Stys-Fijol, N.
EPI2616174	HA	Poland	2023-Jun-24	EPI_ISL_17971991	A/domestic_cat/Poland/H257-G/2023(H5N1)	National Veterinary Research Institut Poland, PIWet-PIB	National Veterinary Research Institut Poland, PIWet-PIB	Swieton, E.;Domanska-Blicharz, K.;Tarasiuk, K.; Wyrostek, K.;Stys-Fijol, N.
EPI2616166	HA	Poland	2023-Jun-24	EPI_ISL_17971990	A/domestic_cat/Poland/H256-G/2023(H5N1)	National Veterinary Research Institut Poland, PIWet-PIB	National Veterinary Research Institut Poland, PIWet-PIB	Swieton, E.;Domanska-Blicharz, K.;Tarasiuk, K.; Wyrostek, K.;Stys-Fijol, N.
EPI2610821	HA	Poland	2023-Jun-19	EPI_ISL_17951056	A/domestic_cat/Poland/Kot1/2023	National Veterinary Research Institut Poland, PIWet-PIB	National Veterinary Research Institut Poland, PIWet-PIB	Edyta,≈öwiƒôto≈Ñ; Katarzyna,Doma≈Ñska-Blicharz; Aleksandra,Giza; Marta,Pietruk; Karolina,Tarasiuk; Krzysztof,Wyrostek; Natalia, Sty≈õ-Fijo≈Ç
EPI2610813	HA	Poland	2023-Jun-20	EPI_ISL_17951055	A/domestic_cat/Poland/H247/2023	National Veterinary Research Institut Poland, PIWet-PIB	National Veterinary Research Institut Poland, PIWet-PIB	Edyta,≈öwiƒôto≈Ñ; Katarzyna,Doma≈Ñska-Blicharz; Aleksandra,Giza; Marta,Pietruk; Karolina,Tarasiuk; Krzysztof,Wyrostek; Natalia, Sty≈õ-Fijo≈Ç
EPI2610805	HA	Poland	2023-Jun-15	EPI_ISL_17951054	A/domestic_cat/Poland/H248/2023	National Veterinary Research Institut Poland, PIWet-PIB	National Veterinary Research Institut Poland, PIWet-PIB	Edyta,≈öwiƒôto≈Ñ; Katarzyna,Doma≈Ñska-Blicharz; Aleksandra,Giza; Marta,Pietruk; Karolina,Tarasiuk; Krzysztof,Wyrostek; Natalia, Sty≈õ-Fijo≈Ç
EPI2610797	HA	Poland	2023-Jun-22	EPI_ISL_17951053	A/domestic_cat/Poland/H254/2023	National Veterinary Research Institut Poland, PIWet-PIB	National Veterinary Research Institut Poland, PIWet-PIB	Edyta,≈öwiƒôto≈Ñ; Katarzyna,Doma≈Ñska-Blicharz; Aleksandra,Giza; Marta,Pietruk; Karolina,Tarasiuk; Krzysztof,Wyrostek; Natalia, Sty≈õ-Fijo≈Ç
EPI2610789	HA	Poland	2023-Jun-22	EPI_ISL_17951052	A/domestic_cat/Poland/H253/2023	National Veterinary Research Institut Poland, PIWet-PIB	National Veterinary Research Institut Poland, PIWet-PIB	Edyta,≈öwiƒôto≈Ñ; Katarzyna,Doma≈Ñska-Blicharz; Aleksandra,Giza; Marta,Pietruk; Karolina,Tarasiuk; Krzysztof,Wyrostek; Natalia, Sty≈õ-Fijo≈Ç
EPI2610781	HA	Poland	2023-Jun-22	EPI_ISL_17951051	A/domestic_cat/Poland/H252/2023	National Veterinary Research Institut Poland, PIWet-PIB	National Veterinary Research Institut Poland, PIWet-PIB	Edyta,≈öwiƒôto≈Ñ; Katarzyna,Doma≈Ñska-Blicharz; Aleksandra,Giza; Marta,Pietruk; Karolina,Tarasiuk; Krzysztof,Wyrostek; Natalia, Sty≈õ-Fijo≈Ç
EPI2610773	HA	Poland	2023-Jun-22	EPI_ISL_17950995	A/domestic_cat/Poland/H249/2023	National Veterinary Research Institut Poland, PIWet-PIB	National Veterinary Research Institut Poland, PIWet-PIB	Edyta,≈öwiƒôto≈Ñ; Katarzyna,Doma≈Ñska-Blicharz; Aleksandra,Giza; Marta,Pietruk; Karolina,Tarasiuk; Krzysztof,Wyrostek; Natalia, Sty≈õ-Fijo≈Ç
EPI2603671	HA	United States	2023-Mar-30	EPI_ISL_17821770	A/cat/Nebraska/23-010184-001/2023	Nebraska Veterinary Diagnostic Center	National Veterinary Services Laboratories - USDA	Chinh,Thanh;Franzen,Kerrie;Love,Emily;Ozella,Mikaela;Killian,Mary;Lantz,Kristina;Stuber,Tod;Hicks,Jessica;Norris,Cameron
EPI2281678	HA	France	2022-Dec-24	EPI_ISL_16395206	A/cat/France/22P026544/2022	Anses (Ploufragan-Plouzan√©)	ANSES Agence Nationale De Securite Sanitaire De L‚Äôalimentation
EPI2917768	HA	Finland	2023-Oct-17	EPI_ISL_18771245	A/white mink/Finland/UH-361-E1/2023	University of Helsinki, Department of Virology	Finnish Institute for Health and Welfare, THL	Altan, E; Avelin, V; Lindh, E; Savolainen-Kopra, C; Sironen, T; √ñsterlund, P.
EPI2917759	HA	Finland	2023-Oct-17	EPI_ISL_18771244	A/white mink/Finland/UH-357-E1/2023	University of Helsinki, Department of Virology	Finnish Institute for Health and Welfare, THL	Altan, E; Avelin, V; Lindh, E; Savolainen-Kopra, C; Sironen, T; √ñsterlund, P.
EPI2917729	HA	Finland	2023-Oct-17	EPI_ISL_18771178	A/white mink/Finland/UH-353-E1/2023	University of Helsinki, Department of Virology	Finnish Institute for Health and Welfare, THL	Altan, E; Avelin, V; Lindh, E; Savolainen-Kopra, C; Sironen, T; √ñsterlund, P.
EPI2907890	HA	Finland	2023-Sep-20	EPI_ISL_18755130	A/mink/Finland/3082/2023	Finnish Food Authority	Finnish Food Authority	Kauppinen, Ari; Kareinen, Lauri; Tammiranta, Niina; Kantala, Tuija; Fusaro, Alice; Gadd, Tuija
EPI2907882	HA	Finland	2023-Sep-20	EPI_ISL_18755129	A/mink/Finland/3080/2023	Finnish Food Authority	Finnish Food Authority	Kauppinen, Ari; Kareinen, Lauri; Tammiranta, Niina; Kantala, Tuija; Fusaro, Alice; Gadd, Tuija
EPI2755659	HA	Finland	2023-Aug-07	EPI_ISL_18290480	A/mink/Finland/735/2023	Finnish Food Authority	Finnish Food Authority	Kauppinen, Ari; Kareinen, Lauri; Tammiranta, Niina; Kantala, Tuija; Fusaro, Alice; Gadd, Tuija
EPI2755651	HA	Finland	2023-Aug-07	EPI_ISL_18290479	A/mink/Finland/731/2023	Finnish Food Authority	Finnish Food Authority	Kauppinen, Ari; Kareinen, Lauri; Tammiranta, Niina; Kantala, Tuija; Fusaro, Alice; Gadd, Tuija
EPI2755567	HA	Finland	2023-Jul-03	EPI_ISL_18290468	A/mink/Finland/1003/2023	Finnish Food Authority	Finnish Food Authority	Kauppinen, Ari; Kareinen, Lauri; Tammiranta, Niina; Kantala, Tuija; Fusaro, Alice; Gadd, Tuija
EPI2755773	HA	Finland	2023-Jul-03	EPI_ISL_18290467	A/mink/Finland/1002/2023	Finnish Food Authority	Finnish Food Authority	Kauppinen, Ari; Kareinen, Lauri; Tammiranta, Niina; Kantala, Tuija; Fusaro, Alice; Gadd, Tuija
EPI2061051	HA	Netherlands	2022-Mar-05	EPI_ISL_13201074	A/European polecat/Netherlands/1/2022	Erasmus Medical Center	Erasmus Medical Center
EPI1965229	HA	Netherlands	2022-Jan-17	EPI_ISL_9111104	A/otter/Netherlands/22001014-005/2022	Wageningen Bioveterinary Research	Wageningen Bioveterinary Research	Beerens, Nancy; Harders, Frank; Pritz-Verschuren, Sylvia; Roose, Marit; Venema, Sandra; Germeraad, Evelien; Engelsma, Marc; Heutink, Rene
EPI3261179	HA	United States	2024-Mar-20	EPI_ISL_19094660	A/domestic cat/Oklahoma/24_009118-002/2024	United States Department of Agriculture, Agricultural Research Service, National Animal Disease Center	United States Department of Agriculture, Agricultural Research Service, National Animal Disease Center	Nguyen,T., Hutter,C., Markin,A., Thomas,M., Lantz,K., Killian,M.L., Janzen,G.M., Vijendran,S., Wagle,S., Inderski,B., Magstadt,D.R., Li,G., Diel,D.G., Frye,E.A., Dimitrov,K.M., Swinford,A.K., Thompson,A.C., Snevik,K.R., Suarez,D.L., Spackman,E., Lakin,S.M., C,S., Johnson,K.R., Baker,A.L., Robbe-Austerman,S., Torchetti,M.K.; Anderson,T.K.
EPI3255568	HA	United States	2024-Mar-20	EPI_ISL_19088568	A/feline/Texas/24-029329-02/2024	Iowa State University, Veterinary Microbiology and Preventive Medicine Faculty	Iowa State University, Veterinary Microbiology and Preventive Medicine Faculty	Burrough,E.R., Magstadt,D.R., Petersen,B., Timmermans,S.J., Gauger,P.C., Zhang,J., Siepker,C., Mainenti,M., Li,G., Thompson,A.C., Gorden,P.J., Plummer,P.J.; Main,R.
EPI3255577	HA	United States	2024-Mar-20	EPI_ISL_19088567	A/feline/Texas/24-029329-01/2024	Iowa State University, Veterinary Microbiology and Preventive Medicine Faculty	Iowa State University, Veterinary Microbiology and Preventive Medicine Faculty	Burrough,E.R., Magstadt,D.R., Petersen,B., Timmermans,S.J., Gauger,P.C., Zhang,J., Siepker,C., Mainenti,M., Li,G., Thompson,A.C., Gorden,P.J., Plummer,P.J.; Main,R.
EPI3208235	HA	United States	2023-Jan-01	EPI_ISL_19054399	A/feline/USA/23-037332-001/2023	National Veterinary Services Laboratories - USDA	National Veterinary Services Laboratories - USDA	Aufderhar,Matthew;Franzen,Kerrie;Love,Emily;Killian,Mary;Lantz,Kristina;Stuber,Tod;Hicks,Jessica;Norris,Cameron
EPI3208227	HA	United States	2024-Mar-16	EPI_ISL_19054398	A/feline/USA/24-009311-006/2024	National Veterinary Services Laboratories - USDA	National Veterinary Services Laboratories - USDA	Aufderhar,Matthew;Franzen,Kerrie;Love,Emily;Killian,Mary;Lantz,Kristina;Stuber,Tod;Hicks,Jessica;Norris,Cameron
EPI3208219	HA	United States	2024-Mar-16	EPI_ISL_19054397	A/feline/Texas/24-009311-004/2024	National Veterinary Services Laboratories - USDA	National Veterinary Services Laboratories - USDA	Aufderhar,Matthew;Franzen,Kerrie;Love,Emily;Killian,Mary;Lantz,Kristina;Stuber,Tod;Hicks,Jessica;Norris,Cameron
EPI3208211	HA	United States	2024-Mar-20	EPI_ISL_19054396	A/feline/New Mexico/24-009116-005/2024	National Veterinary Services Laboratories - USDA	National Veterinary Services Laboratories - USDA	Aufderhar,Matthew;Franzen,Kerrie;Love,Emily;Killian,Mary;Lantz,Kristina;Stuber,Tod;Hicks,Jessica;Norris,Cameron
EPI3208203	HA	United States	2024-Mar-20	EPI_ISL_19054395	A/feline/New Mexico/24-009116-004/2024	National Veterinary Services Laboratories - USDA	National Veterinary Services Laboratories - USDA	Aufderhar,Matthew;Franzen,Kerrie;Love,Emily;Killian,Mary;Lantz,Kristina;Stuber,Tod;Hicks,Jessica;Norris,Cameron
EPI3208195	HA	United States	2024-Mar-20	EPI_ISL_19054394	A/feline/New Mexico/24-009116-002/2024	National Veterinary Services Laboratories - USDA	National Veterinary Services Laboratories - USDA	Aufderhar,Matthew;Franzen,Kerrie;Love,Emily;Killian,Mary;Lantz,Kristina;Stuber,Tod;Hicks,Jessica;Norris,Cameron
EPI3208187	HA	United States	2024-Mar-20	EPI_ISL_19054393	A/feline/Texas/24-008850-002/2024	National Veterinary Services Laboratories - USDA	National Veterinary Services Laboratories - USDA	Aufderhar,Matthew;Franzen,Kerrie;Love,Emily;Killian,Mary;Lantz,Kristina;Stuber,Tod;Hicks,Jessica;Norris,Cameron
EPI3208179	HA	United States	2024-Mar-20	EPI_ISL_19054392	A/feline/Texas/24-008850-001/2024	National Veterinary Services Laboratories - USDA	National Veterinary Services Laboratories - USDA	Aufderhar,Matthew;Franzen,Kerrie;Love,Emily;Killian,Mary;Lantz,Kristina;Stuber,Tod;Hicks,Jessica;Norris,Cameron
EPI3208171	HA	United States	2024-Mar-22	EPI_ISL_19054391	A/feline/Texas/24-008764-002/2024	National Veterinary Services Laboratories - USDA	National Veterinary Services Laboratories - USDA	Aufderhar,Matthew;Franzen,Kerrie;Love,Emily;Killian,Mary;Lantz,Kristina;Stuber,Tod;Hicks,Jessica;Norris,Cameron
EPI3208163	HA	United States	2024-Mar-22	EPI_ISL_19054390	A/feline/Texas/24-008764-001/2024	National Veterinary Services Laboratories - USDA	National Veterinary Services Laboratories - USDA	Aufderhar,Matthew;Franzen,Kerrie;Love,Emily;Killian,Mary;Lantz,Kristina;Stuber,Tod;Hicks,Jessica;Norris,Cameron
EPI3261251	HA	United States	2024-Mar-08	EPI_ISL_19094669	A/goat/Minnesota/24_007234-035/2024	United States Department of Agriculture, Agricultural Research Service, National Animal Disease Center	United States Department of Agriculture, Agricultural Research Service, National Animal Disease Center	Nguyen,T., Hutter,C., Markin,A., Thomas,M., Lantz,K., Killian,M.L., Janzen,G.M., Vijendran,S., Wagle,S., Inderski,B., Magstadt,D.R., Li,G., Diel,D.G., Frye,E.A., Dimitrov,K.M., Swinford,A.K., Thompson,A.C., Snevik,K.R., Suarez,D.L., Spackman,E., Lakin,S.M., C,S., Johnson,K.R., Baker,A.L., Robbe-Austerman,S., Torchetti,M.K.; Anderson,T.K.
EPI3261243	HA	United States	2024-Mar-08	EPI_ISL_19094668	A/goat/Minnesota/24_007234-034/2024	United States Department of Agriculture, Agricultural Research Service, National Animal Disease Center	United States Department of Agriculture, Agricultural Research Service, National Animal Disease Center	Nguyen,T., Hutter,C., Markin,A., Thomas,M., Lantz,K., Killian,M.L., Janzen,G.M., Vijendran,S., Wagle,S., Inderski,B., Magstadt,D.R., Li,G., Diel,D.G., Frye,E.A., Dimitrov,K.M., Swinford,A.K., Thompson,A.C., Snevik,K.R., Suarez,D.L., Spackman,E., Lakin,S.M., C,S., Johnson,K.R., Baker,A.L., Robbe-Austerman,S., Torchetti,M.K.; Anderson,T.K.
EPI3261235	HA	United States	2024-Mar-08	EPI_ISL_19094667	A/goat/Minnesota/24_007234-032/2024	United States Department of Agriculture, Agricultural Research Service, National Animal Disease Center	United States Department of Agriculture, Agricultural Research Service, National Animal Disease Center	Nguyen,T., Hutter,C., Markin,A., Thomas,M., Lantz,K., Killian,M.L., Janzen,G.M., Vijendran,S., Wagle,S., Inderski,B., Magstadt,D.R., Li,G., Diel,D.G., Frye,E.A., Dimitrov,K.M., Swinford,A.K., Thompson,A.C., Snevik,K.R., Suarez,D.L., Spackman,E., Lakin,S.M., C,S., Johnson,K.R., Baker,A.L., Robbe-Austerman,S., Torchetti,M.K.; Anderson,T.K.
EPI3261227	HA	United States	2024-Mar-08	EPI_ISL_19094666	A/goat/Minnesota/24_007234-030/2024	United States Department of Agriculture, Agricultural Research Service, National Animal Disease Center	United States Department of Agriculture, Agricultural Research Service, National Animal Disease Center	Nguyen,T., Hutter,C., Markin,A., Thomas,M., Lantz,K., Killian,M.L., Janzen,G.M., Vijendran,S., Wagle,S., Inderski,B., Magstadt,D.R., Li,G., Diel,D.G., Frye,E.A., Dimitrov,K.M., Swinford,A.K., Thompson,A.C., Snevik,K.R., Suarez,D.L., Spackman,E., Lakin,S.M., C,S., Johnson,K.R., Baker,A.L., Robbe-Austerman,S., Torchetti,M.K.; Anderson,T.K.
EPI3261219	HA	United States	2024-Mar-08	EPI_ISL_19094665	A/goat/Minnesota/24_007234-029/2024	United States Department of Agriculture, Agricultural Research Service, National Animal Disease Center	United States Department of Agriculture, Agricultural Research Service, National Animal Disease Center	Nguyen,T., Hutter,C., Markin,A., Thomas,M., Lantz,K., Killian,M.L., Janzen,G.M., Vijendran,S., Wagle,S., Inderski,B., Magstadt,D.R., Li,G., Diel,D.G., Frye,E.A., Dimitrov,K.M., Swinford,A.K., Thompson,A.C., Snevik,K.R., Suarez,D.L., Spackman,E., Lakin,S.M., C,S., Johnson,K.R., Baker,A.L., Robbe-Austerman,S., Torchetti,M.K.; Anderson,T.K.
EPI3261091	HA	United States	2024-Mar-08	EPI_ISL_19094649	A/goat/Minnesota/24_007234-036/2024	United States Department of Agriculture, Agricultural Research Service, National Animal Disease Center	United States Department of Agriculture, Agricultural Research Service, National Animal Disease Center	Nguyen,T., Hutter,C., Markin,A., Thomas,M., Lantz,K., Killian,M.L., Janzen,G.M., Vijendran,S., Wagle,S., Inderski,B., Magstadt,D.R., Li,G., Diel,D.G., Frye,E.A., Dimitrov,K.M., Swinford,A.K., Thompson,A.C., Snevik,K.R., Suarez,D.L., Spackman,E., Lakin,S.M., C,S., Johnson,K.R., Baker,A.L., Robbe-Austerman,S., Torchetti,M.K.; Anderson,T.K.
EPI3261083	HA	United States	2024-Mar-08	EPI_ISL_19094648	A/goat/Minnesota/24_007234-037/2024	United States Department of Agriculture, Agricultural Research Service, National Animal Disease Center	United States Department of Agriculture, Agricultural Research Service, National Animal Disease Center	Nguyen,T., Hutter,C., Markin,A., Thomas,M., Lantz,K., Killian,M.L., Janzen,G.M., Vijendran,S., Wagle,S., Inderski,B., Magstadt,D.R., Li,G., Diel,D.G., Frye,E.A., Dimitrov,K.M., Swinford,A.K., Thompson,A.C., Snevik,K.R., Suarez,D.L., Spackman,E., Lakin,S.M., C,S., Johnson,K.R., Baker,A.L., Robbe-Austerman,S., Torchetti,M.K.; Anderson,T.K.
EPI3261075	HA	United States	2024-Mar-08	EPI_ISL_19094647	A/goat/Minnesota/24_007234-044/2024	United States Department of Agriculture, Agricultural Research Service, National Animal Disease Center	United States Department of Agriculture, Agricultural Research Service, National Animal Disease Center	Nguyen,T., Hutter,C., Markin,A., Thomas,M., Lantz,K., Killian,M.L., Janzen,G.M., Vijendran,S., Wagle,S., Inderski,B., Magstadt,D.R., Li,G., Diel,D.G., Frye,E.A., Dimitrov,K.M., Swinford,A.K., Thompson,A.C., Snevik,K.R., Suarez,D.L., Spackman,E., Lakin,S.M., C,S., Johnson,K.R., Baker,A.L., Robbe-Austerman,S., Torchetti,M.K.; Anderson,T.K.
EPI3261067	HA	United States	2024-Mar-08	EPI_ISL_19094646	A/goat/Minnesota/24_007234-047/2024	United States Department of Agriculture, Agricultural Research Service, National Animal Disease Center	United States Department of Agriculture, Agricultural Research Service, National Animal Disease Center	Nguyen,T., Hutter,C., Markin,A., Thomas,M., Lantz,K., Killian,M.L., Janzen,G.M., Vijendran,S., Wagle,S., Inderski,B., Magstadt,D.R., Li,G., Diel,D.G., Frye,E.A., Dimitrov,K.M., Swinford,A.K., Thompson,A.C., Snevik,K.R., Suarez,D.L., Spackman,E., Lakin,S.M., C,S., Johnson,K.R., Baker,A.L., Robbe-Austerman,S., Torchetti,M.K.; Anderson,T.K.
EPI3260995	HA	United States	2024-Feb-23	EPI_ISL_19094637	A/skunk/Washington/24_005959-006/2024	United States Department of Agriculture, Agricultural Research Service, National Animal Disease Center	United States Department of Agriculture, Agricultural Research Service, National Animal Disease Center	Nguyen,T., Hutter,C., Markin,A., Thomas,M., Lantz,K., Killian,M.L., Janzen,G.M., Vijendran,S., Wagle,S., Inderski,B., Magstadt,D.R., Li,G., Diel,D.G., Frye,E.A., Dimitrov,K.M., Swinford,A.K., Thompson,A.C., Snevik,K.R., Suarez,D.L., Spackman,E., Lakin,S.M., C,S., Johnson,K.R., Baker,A.L., Robbe-Austerman,S., Torchetti,M.K.; Anderson,T.K.
EPI3260987	HA	United States	2024-Feb-23	EPI_ISL_19094636	A/skunk/Washington/24_005959-005/2024	United States Department of Agriculture, Agricultural Research Service, National Animal Disease Center	United States Department of Agriculture, Agricultural Research Service, National Animal Disease Center	Nguyen,T., Hutter,C., Markin,A., Thomas,M., Lantz,K., Killian,M.L., Janzen,G.M., Vijendran,S., Wagle,S., Inderski,B., Magstadt,D.R., Li,G., Diel,D.G., Frye,E.A., Dimitrov,K.M., Swinford,A.K., Thompson,A.C., Snevik,K.R., Suarez,D.L., Spackman,E., Lakin,S.M., C,S., Johnson,K.R., Baker,A.L., Robbe-Austerman,S., Torchetti,M.K.; Anderson,T.K.
EPI3260979	HA	United States	2024-Feb-23	EPI_ISL_19094635	A/skunk/Washington/24_005959-004/2024	United States Department of Agriculture, Agricultural Research Service, National Animal Disease Center	United States Department of Agriculture, Agricultural Research Service, National Animal Disease Center	Nguyen,T., Hutter,C., Markin,A., Thomas,M., Lantz,K., Killian,M.L., Janzen,G.M., Vijendran,S., Wagle,S., Inderski,B., Magstadt,D.R., Li,G., Diel,D.G., Frye,E.A., Dimitrov,K.M., Swinford,A.K., Thompson,A.C., Snevik,K.R., Suarez,D.L., Spackman,E., Lakin,S.M., C,S., Johnson,K.R., Baker,A.L., Robbe-Austerman,S., Torchetti,M.K.; Anderson,T.K.
EPI3260971	HA	United States	2024-Mar-23	EPI_ISL_19094634	A/raccoon/New Mexico/24_009496-002/2024	United States Department of Agriculture, Agricultural Research Service, National Animal Disease Center	United States Department of Agriculture, Agricultural Research Service, National Animal Disease Center	Nguyen,T., Hutter,C., Markin,A., Thomas,M., Lantz,K., Killian,M.L., Janzen,G.M., Vijendran,S., Wagle,S., Inderski,B., Magstadt,D.R., Li,G., Diel,D.G., Frye,E.A., Dimitrov,K.M., Swinford,A.K., Thompson,A.C., Snevik,K.R., Suarez,D.L., Spackman,E., Lakin,S.M., C,S., Johnson,K.R., Baker,A.L., Robbe-Austerman,S., Torchetti,M.K.; Anderson,T.K.
EPI3260939	HA	United States	2024-Mar-08	EPI_ISL_19094630	A/goat/Minnesota/24_007234-050/2024	United States Department of Agriculture, Agricultural Research Service, National Animal Disease Center	United States Department of Agriculture, Agricultural Research Service, National Animal Disease Center	Nguyen,T., Hutter,C., Markin,A., Thomas,M., Lantz,K., Killian,M.L., Janzen,G.M., Vijendran,S., Wagle,S., Inderski,B., Magstadt,D.R., Li,G., Diel,D.G., Frye,E.A., Dimitrov,K.M., Swinford,A.K., Thompson,A.C., Snevik,K.R., Suarez,D.L., Spackman,E., Lakin,S.M., C,S., Johnson,K.R., Baker,A.L., Robbe-Austerman,S., Torchetti,M.K.; Anderson,T.K.
EPI3260931	HA	United States	2024-Mar-08	EPI_ISL_19094629	A/goat/Minnesota/24_007234-048/2024	United States Department of Agriculture, Agricultural Research Service, National Animal Disease Center	United States Department of Agriculture, Agricultural Research Service, National Animal Disease Center	Nguyen,T., Hutter,C., Markin,A., Thomas,M., Lantz,K., Killian,M.L., Janzen,G.M., Vijendran,S., Wagle,S., Inderski,B., Magstadt,D.R., Li,G., Diel,D.G., Frye,E.A., Dimitrov,K.M., Swinford,A.K., Thompson,A.C., Snevik,K.R., Suarez,D.L., Spackman,E., Lakin,S.M., C,S., Johnson,K.R., Baker,A.L., Robbe-Austerman,S., Torchetti,M.K.; Anderson,T.K.
EPI3244335	HA	United States	2024-Feb-26	EPI_ISL_19083124	A/Mountain Lion/Montana/01/2024	Montana Public Health Laboratory	National Institute of Allergy and Infectious Diseases NIAID/NIH	Williamson, Brandi; Anzick, Sarah; Yinda, C. Kwe; Beare, Paul; Kanakabandi, Kishore; Martens, Craig; de Wit, Emmie; Munster, Vincent
EPI3229800	HA	Uruguay	2023-Sep-06	EPI_ISL_19070498	A/pinniped/Uruguay/P4_6923/2023	Universidad de la Rep√∫blica, Facultad de Ciencias, Genetica Evolutiva/Divisi√≥n de Laboratorios Veterinarios, Plataforma Genomica		Tomas,G., Marandino,A., Panzera,Y., Rodriguez,S., Wallau,G.L., Dezordi,F.Z., Perez,R., Bassetti,L., Negro,R., Williman,J., Uriarte,V., Grazioli,F., Leizagoyen,C., Riveron,S., Coronel,J., Bello,S., Paez,E., Lima,M., Mendez,V.; Perez,R.
EPI3229727	HA	Uruguay	2023-Sep-14	EPI_ISL_19070486	A/pinniped/Uruguay/P18_14923/2023	Universidad de la Rep√∫blica, Facultad de Ciencias, Genetica Evolutiva/Divisi√≥n de Laboratorios Veterinarios, Plataforma Genomica		Tomas,G., Marandino,A., Panzera,Y., Rodriguez,S., Wallau,G.L., Dezordi,F.Z., Perez,R., Bassetti,L., Negro,R., Williman,J., Uriarte,V., Grazioli,F., Leizagoyen,C., Riveron,S., Coronel,J., Bello,S., Paez,E., Lima,M., Mendez,V.; Perez,R.
EPI3229719	HA	Uruguay	2023-Sep-14	EPI_ISL_19070485	A/pinniped/Uruguay/P17_14923/2023	Universidad de la Rep√∫blica, Facultad de Ciencias, Genetica Evolutiva/Divisi√≥n de Laboratorios Veterinarios, Plataforma Genomica		Tomas,G., Marandino,A., Panzera,Y., Rodriguez,S., Wallau,G.L., Dezordi,F.Z., Perez,R., Bassetti,L., Negro,R., Williman,J., Uriarte,V., Grazioli,F., Leizagoyen,C., Riveron,S., Coronel,J., Bello,S., Paez,E., Lima,M., Mendez,V.; Perez,R.
EPI3229705	HA	Uruguay	2023-Sep-11	EPI_ISL_19070483	A/pinniped/Uruguay/P14_11923/2023	Universidad de la Rep√∫blica, Facultad de Ciencias, Genetica Evolutiva/Divisi√≥n de Laboratorios Veterinarios, Plataforma Genomica		Tomas,G., Marandino,A., Panzera,Y., Rodriguez,S., Wallau,G.L., Dezordi,F.Z., Perez,R., Bassetti,L., Negro,R., Williman,J., Uriarte,V., Grazioli,F., Leizagoyen,C., Riveron,S., Coronel,J., Bello,S., Paez,E., Lima,M., Mendez,V.; Perez,R.
EPI3229697	HA	Uruguay	2023-Sep-11	EPI_ISL_19070482	A/pinniped/Uruguay/P13_11923/2023	Universidad de la Rep√∫blica, Facultad de Ciencias, Genetica Evolutiva/Divisi√≥n de Laboratorios Veterinarios, Plataforma Genomica		Tomas,G., Marandino,A., Panzera,Y., Rodriguez,S., Wallau,G.L., Dezordi,F.Z., Perez,R., Bassetti,L., Negro,R., Williman,J., Uriarte,V., Grazioli,F., Leizagoyen,C., Riveron,S., Coronel,J., Bello,S., Paez,E., Lima,M., Mendez,V.; Perez,R.
EPI3229689	HA	Uruguay	2023-Sep-08	EPI_ISL_19070481	A/pinniped/Uruguay/P10_8923/2023	Universidad de la Rep√∫blica, Facultad de Ciencias, Genetica Evolutiva/Divisi√≥n de Laboratorios Veterinarios, Plataforma Genomica		Tomas,G., Marandino,A., Panzera,Y., Rodriguez,S., Wallau,G.L., Dezordi,F.Z., Perez,R., Bassetti,L., Negro,R., Williman,J., Uriarte,V., Grazioli,F., Leizagoyen,C., Riveron,S., Coronel,J., Bello,S., Paez,E., Lima,M., Mendez,V.; Perez,R.
EPI3162333	HA	United States	2024-Mar-08	EPI_ISL_19015125	A/goat/Minnesota/24-007234-009/2024	National Veterinary Services Laboratories - USDA	National Veterinary Services Laboratories - USDA	Aufderhar,Matthew;Franzen,Kerrie;Love,Emily;Killian,Mary;Lantz,Kristina;Stuber,Tod;Hicks,Jessica;Norris,Cameron
EPI3162325	HA	United States	2024-Mar-08	EPI_ISL_19015124	A/goat/Minnesota/24-007234-006/2024	National Veterinary Services Laboratories - USDA	National Veterinary Services Laboratories - USDA	Aufderhar,Matthew;Franzen,Kerrie;Love,Emily;Killian,Mary;Lantz,Kristina;Stuber,Tod;Hicks,Jessica;Norris,Cameron
EPI3162317	HA	United States	2024-Mar-08	EPI_ISL_19015123	A/goat/Minnesota/24-007234-003/2024	National Veterinary Services Laboratories - USDA	National Veterinary Services Laboratories - USDA	Aufderhar,Matthew;Franzen,Kerrie;Love,Emily;Killian,Mary;Lantz,Kristina;Stuber,Tod;Hicks,Jessica;Norris,Cameron
EPI3110584	HA	United States	2023-Oct-01	EPI_ISL_18976667	A/polar bear/Alaska/23-038123/2023	United States Department of Agriculture, National Veterinary Services Laboratories-Diagnostic Virology Laboratory	National Veterinary Services Laboratories - USDA	Franzen,Kerrie;Love,Emily;Ozella,Mikaela;Killian,Mary;Lantz,Kristina;Stuber,Tod;Hicks,Jessica;Norris,Cameron
EPI2759139	HA	United States	2023-Aug-29	EPI_ISL_18311028	A/harbor seal/Washington/23-026504-002/2023	National Veterinary Services Laboratories - USDA	National Veterinary Services Laboratories - USDA	Chinh,Thanh;Franzen,Kerrie;Love,Emily;Ozella,Mikaela;Killian,Mary;Lantz,Kristina;Stuber,Tod;Hicks,Jessica;Norris,Cameron
EPI2759131	HA	United States	2023-Aug-29	EPI_ISL_18311027	A/harbor seal/Washington/23-026504-001/2023	National Veterinary Services Laboratories - USDA	National Veterinary Services Laboratories - USDA	Chinh,Thanh;Franzen,Kerrie;Love,Emily;Ozella,Mikaela;Killian,Mary;Lantz,Kristina;Stuber,Tod;Hicks,Jessica;Norris,Cameron
EPI2759115	HA	United States	2023-Aug-25	EPI_ISL_18311025	A/harbor seal/Washington/23-025991-001/2023	National Veterinary Services Laboratories - USDA	National Veterinary Services Laboratories - USDA	Chinh,Thanh;Franzen,Kerrie;Love,Emily;Ozella,Mikaela;Killian,Mary;Lantz,Kristina;Stuber,Tod;Hicks,Jessica;Norris,Cameron
EPI2759107	HA	United States	2023-Aug-19	EPI_ISL_18311024	A/harbor seal/Washington/23-025744-002/2023	National Veterinary Services Laboratories - USDA	National Veterinary Services Laboratories - USDA	Chinh,Thanh;Franzen,Kerrie;Love,Emily;Ozella,Mikaela;Killian,Mary;Lantz,Kristina;Stuber,Tod;Hicks,Jessica;Norris,Cameron
EPI2759099	HA	United States	2023-Aug-19	EPI_ISL_18311023	A/harbor seal/Washington/23-025744-001/2023	National Veterinary Services Laboratories - USDA	National Veterinary Services Laboratories - USDA	Chinh,Thanh;Franzen,Kerrie;Love,Emily;Ozella,Mikaela;Killian,Mary;Lantz,Kristina;Stuber,Tod;Hicks,Jessica;Norris,Cameron
EPI2745242	HA	Peru	2022-Nov-22	EPI_ISL_18265431	A/dolphin/Peru/PIU-SER002/2022	Servicio Nacional Forestal y de Fauna Silvestre (SERFOR)	Pontificia Universidad Catolica del Peru	Leguia,M.; Garcia-Glaessner,A.; Munoz-Saavedra,B.; Juarez,D.; Barrera,P.; Jara,J.; Silva,W.; Ploog,K.; Colchao-Claux,P.; Lescano,J.
EPI2664223	HA	Peru	2022-Nov-22	EPI_ISL_18054503	A/dolphin/Peru/PIU-002/2022			Leguia,M., Garcia-Glaessner,A., Munoz-Saavedra,B., Juarez,D., Barrera,P., Jara,J., Silva,W., Ploog,K., Colchao-Claux,P.; Lescano,J.
EPI2471936	HA	United Kingdom	2022-Nov-18	EPI_ISL_17257532	A/Bush_dog/England/037680/2022	Animal and Plant Health Agency (APHA)	Animal and Plant Health Agency (APHA)
EPI2467160	HA	France	2022-Nov-07	EPI_ISL_17233426	A/bear/France/23P002848/2022	Anses (Ploufragan-Plouzan√©)	ANSES Agence Nationale De Securite Sanitaire De L‚Äôalimentation	FX,Briand
EPI2437555	HA	Canada	2022-May-18	EPI_ISL_17073215	A/striped_skunk/BC/AIVPHL-118/2022	B.C. Centre for Disease Control	British Columbia Centre for Disease Control	Himsworth, Chelsea; Prystajecky,Natalie; Tyson,John; Jassem,Agatha; Kuchinski,Kevin; Coombe, Michelle; Lee,Tracy; Azana,Rob; Fung,Janet; Chan,Michael; Cheung,Branco; Caleta,Jessica; Tsang,Frankie; Russell,Shannon; Zlosnik,James; Hoang,Linda
EPI2437035	HA	Belgium	2023-Feb-09	EPI_ISL_17072114	A/Mustela_putorius/Belgium/01421_0001/2023	Sciensano - Animal Infectious Diseases	Sciensano, Department of Animal Infectious Diseases	Van Borm, Steven; Roupie, Virginie; Hostyn, Pierre; Mathijs, Elisabeth; Lambrecht, Benedicte; Steensels, Mieke
EPI2263650	HA	United States	2022-Nov-15	EPI_ISL_16297122	A/skunk/Wisconsin/22-037029-001/2022	National Veterinary Services Laboratories - USDA	National Veterinary Services Laboratories - USDA	Chinh,Thanh;Love, Emily;Franzen,Kerrie;Killian,Mary;Koster,Leo;Lantz,Kristina;Stuber,Tod;Hicks,Jessica
EPI2263442	HA	United States	2022-Oct-21	EPI_ISL_16297066	A/skunk/Minnesota/22-034925-001/2022	National Veterinary Services Laboratories - USDA	National Veterinary Services Laboratories - USDA	Chinh,Thanh;Love, Emily;Franzen,Kerrie;Killian,Mary;Koster,Leo;Lantz,Kristina;Stuber,Tod;Hicks,Jessica
EPI2236752	HA	Canada	2022-Apr-26	EPI_ISL_16023453	A/Skunk/AB/FAV-0416-03/2022	Alberta Agriculture and Forestry, Government of Alberta	Canadian Food Inspection Agency	Alkie, Tamiru; Hicks, Mark; Pybuse, Margo J; Xu, Wanhong; Hisanaga, Tamiko; Suderman, Suderman; Koziuk, Janice; Kruczkiewicz, Peter; Nguyen, Hoang Hai; Fisher, Mathew; Lung, Oliver; Berhane, Yohannes
EPI2236760	HA	Canada	2022-Apr-22	EPI_ISL_16023452	A/Skunk/AB/FAV-0416-02/2022	Alberta Agriculture and Forestry, Government of Alberta	Canadian Food Inspection Agency	Alkie, Tamiru; Hicks, Mark; Pybuse, Margo J; Xu, Wanhong; Hisanaga, Tamiko; Suderman, Suderman; Koziuk, Janice; Kruczkiewicz, Peter; Nguyen, Hoang Hai; Fisher, Mathew; Lung, Oliver; Berhane, Yohannes
EPI2236744	HA	Canada	2022-Apr-22	EPI_ISL_16023451	A/Skunk/AB/FAV-0416-01/2022	Alberta Agriculture and Forestry, Government of Alberta	Canadian Food Inspection Agency	Alkie, Tamiru; Hicks, Mark; Pybuse, Margo J; Xu, Wanhong; Hisanaga, Tamiko; Suderman, Suderman; Koziuk, Janice; Kruczkiewicz, Peter; Nguyen, Hoang Hai; Fisher, Mathew; Lung, Oliver; Berhane, Yohannes
EPI2236736	HA	Canada	2022-May-31	EPI_ISL_16023450	A/Skunk/AB/FAV-0835-10/2022	Alberta Agriculture and Forestry, Government of Alberta	Canadian Food Inspection Agency	Alkie, Tamiru; Hicks, Mark; Pybuse, Margo J; Xu, Wanhong; Hisanaga, Tamiko; Suderman, Suderman; Koziuk, Janice; Kruczkiewicz, Peter; Nguyen, Hoang Hai; Fisher, Mathew; Lung, Oliver; Berhane, Yohannes
EPI2236728	HA	Canada	2022-May-04	EPI_ISL_16023449	A/Skunk/AB/FAV-0835-07/2022	Alberta Agriculture and Forestry, Government of Alberta	Canadian Food Inspection Agency	Alkie, Tamiru; Hicks, Mark; Pybuse, Margo J; Xu, Wanhong; Hisanaga, Tamiko; Suderman, Suderman; Koziuk, Janice; Kruczkiewicz, Peter; Nguyen, Hoang Hai; Fisher, Mathew; Lung, Oliver; Berhane, Yohannes
EPI2236720	HA	Canada	2022-May-04	EPI_ISL_16023377	A/Skunk/AB/FAV-0835-05/2022	Alberta Agriculture and Forestry, Government of Alberta	Canadian Food Inspection Agency	Alkie, Tamiru; Hicks, Mark; Pybuse, Margo J; Xu, Wanhong; Hisanaga, Tamiko; Suderman, Suderman; Koziuk, Janice; Kruczkiewicz, Peter; Nguyen, Hoang Hai; Fisher, Mathew; Lung, Oliver; Berhane, Yohannes
EPI2236712	HA	Canada	2022-May-31	EPI_ISL_16023376	A/Skunk/AB/FAV-0835-11/2022	Alberta Agriculture and Forestry, Government of Alberta	Canadian Food Inspection Agency	Alkie, Tamiru; Hicks, Mark; Pybuse, Margo J; Xu, Wanhong; Hisanaga, Tamiko; Suderman, Suderman; Koziuk, Janice; Kruczkiewicz, Peter; Nguyen, Hoang Hai; Fisher, Mathew; Lung, Oliver; Berhane, Yohannes
EPI2236704	HA	Canada	2022-Jul-19	EPI_ISL_16023375	A/Skunk/AB/FAV-0897-03/2022	Alberta Agriculture and Forestry, Government of Alberta	Canadian Food Inspection Agency	Alkie, Tamiru; Hicks, Mark; Pybuse, Margo J; Xu, Wanhong; Hisanaga, Tamiko; Suderman, Suderman; Koziuk, Janice; Kruczkiewicz, Peter; Nguyen, Hoang Hai; Fisher, Mathew; Lung, Oliver; Berhane, Yohannes
EPI2236696	HA	Canada	2022-Jul-19	EPI_ISL_16023374	A/Skunk/AB/FAV-0897-02/2022	Alberta Agriculture and Forestry, Government of Alberta	Canadian Food Inspection Agency	Alkie, Tamiru; Hicks, Mark; Pybuse, Margo J; Xu, Wanhong; Hisanaga, Tamiko; Suderman, Suderman; Koziuk, Janice; Kruczkiewicz, Peter; Nguyen, Hoang Hai; Fisher, Mathew; Lung, Oliver; Berhane, Yohannes
EPI2236688	HA	Canada	2022-Jun-28	EPI_ISL_16023372	A/Skunk/AB/FAV-0897-01/2022	Alberta Agriculture and Forestry, Government of Alberta	Canadian Food Inspection Agency	Alkie, Tamiru; Hicks, Mark; Pybuse, Margo J; Xu, Wanhong; Hisanaga, Tamiko; Suderman, Suderman; Koziuk, Janice; Kruczkiewicz, Peter; Nguyen, Hoang Hai; Fisher, Mathew; Lung, Oliver; Berhane, Yohannes
EPI2150624	HA	Sweden	2022-Jun-29	EPI_ISL_14810369	A/porpoise /Sweden/SVA220712SZ0367/FB002184/O-2022	Swedish Veterinary Agency (SVA)	Swedish Veterinary Agency (SVA)
EPI1958457	HA	Netherlands	2022-Jan-08	EPI_ISL_8799320	A/polecat/Netherlands/22000516-003/2022	Wageningen Bioveterinary Research	Wageningen Bioveterinary Research	Beerens, Nancy; Harders, Frank; Pritz-Verschuren, Sylvia; Roose, Marit; Venema, Sandra; Germeraad, Evelien; Engelsma, Marc; Heutink, Rene
EPI2296209	HA	Belgium	2022-Dec-08	EPI_ISL_16547666	A/Mustela_furo/Belgium/14312-0002/2022	Sciensano - Animal Infectious Diseases	Sciensano, Department of Animal Infectious Diseases	Van Borm, Steven; Roupie, Virginie; Hostyn, Pierre; Lambrecht, Benedicte; Steensels, Mieke
EPI2296197	HA	Belgium	2022-Dec-08	EPI_ISL_16547552	A/Mustela_furo/Belgium/14312-0001/2022	Sciensano - Animal Infectious Diseases	Sciensano, Department of Animal Infectious Diseases	Van Borm, Steven; Roupie, Virginie; Hostyn, Pierre; Lambrecht, Benedicte; Steensels, Mieke
EPI1995132	HA	Slovenia	2022-Jan-05	EPI_ISL_11007536	A/ferret/Slovenia/308MZ_22VIR777-9/2022	Beijing Genomics Institute (BGI)	Istituto Zooprofilattico Sperimentale delle Venezie	Slavec, B.; Ra?nik, J.; Krape?, U.; ?labravec, Z.; A?ko, J.; Cociancich, V.; Paller, T.; Vidrih, ?.; Rojs, O.Z.; Arseniev, S.; Groza, O.; Barbierato, G.; Zecchin, B.; Fusaro, A.; Schivo, A.; Salviato, A.; Palumbo, E.; Giussani, E.; Monne, I.; Terregino, C.
EPI2611365	HA	Poland	2023-Jun-21	EPI_ISL_17956378	A/domestic_cat/Poland/H246-M/2023	National Veterinary Research Institut Poland, PIWet-PIB	National Veterinary Research Institut Poland, PIWet-PIB	Edyta,≈öwiƒôto≈Ñ; Katarzyna,Doma≈Ñska-Blicharz; Aleksandra,Giza; Marta,Pietruk; Karolina,Tarasiuk; Krzysztof,Wyrostek; Natalia, Sty≈õ-Fijo≈Ç
EPI2610690	HA	Poland	2023-Jun-21	EPI_ISL_17949824	A/cat/Poland/Gda1/2023	University of Gdansk	University of Gdansk	Maciej,Grzybek; Tomasz,Lepionka; Krzysztof,Pyrc; Lukasz,Rabalski
EPI2837134	NA	Finland	2023-Sep-20	EPI_ISL_18618768	A/mink/Finland/3079/2023	Finnish Food Authority	Finnish Food Authority	Kauppinen, Ari; Kareinen, Lauri; Tammiranta, Niina; Kantala, Tuija; Fusaro, Alice; Gadd, Tuija
EPI2837126	NA	Finland	2023-Sep-20	EPI_ISL_18618767	A/mink/Finland/3078/2023	Finnish Food Authority	Finnish Food Authority	Kauppinen, Ari; Kareinen, Lauri; Tammiranta, Niina; Kantala, Tuija; Fusaro, Alice; Gadd, Tuija
EPI2837116	NA	Finland	2023-Sep-20	EPI_ISL_18618766	A/mink/Finland/3081/2023	Finnish Food Authority	Finnish Food Authority	Kauppinen, Ari; Kareinen, Lauri; Tammiranta, Niina; Kantala, Tuija; Fusaro, Alice; Gadd, Tuija
EPI2837106	NA	Finland	2023-Sep-20	EPI_ISL_18618701	A/mink/Finland/3076/2023	Finnish Food Authority	Finnish Food Authority	Kauppinen, Ari; Kareinen, Lauri; Tammiranta, Niina; Kantala, Tuija; Fusaro, Alice; Gadd, Tuija
EPI2837082	NA	Finland	2023-Aug-05	EPI_ISL_18618377	A/mink/Finland/688/2023	Finnish Food Authority	Finnish Food Authority	Kauppinen, Ari; Kareinen, Lauri; Tammiranta, Niina; Kantala, Tuija; Fusaro, Alice; Gadd, Tuija
EPI2760293	NA	Finland	2023-Jul-17	EPI_ISL_18321746	A/raccoon_dog/Finland/552_23VIR6928-5/2023	Finnish Food Authority	Istituto Zooprofilattico Sperimentale Delle Venezie	Gadd, T.; Tammiranta, N; Kantala, K.; Nokireki, T.; Pastori, A.; Zecchin, B.; Fusaro, A.; Schivo, A.; Salviato, A.; Palumbo, E.; Giussani, E.; Monne, I.; Terregino, C.
EPI2755521	NA	Finland	2023-Aug-05	EPI_ISL_18292966	A/mink/Finland/710/2023	Finnish Food Authority	Finnish Food Authority	Kauppinen, Ari; Kareinen, Lauri; Tammiranta, Niina; Kantala, Tuija; Fusaro, Alice; Giussani, Edoardo; Gadd, Tuija
EPI2755513	NA	Finland	2023-Aug-05	EPI_ISL_18292965	A/mink/Finland/709/2023	Finnish Food Authority	Finnish Food Authority	Kauppinen, Ari; Kareinen, Lauri; Tammiranta, Niina; Kantala, Tuija; Fusaro, Alice; Giussani, Edoardo; Gadd, Tuija
EPI2755413	NA	Finland	2023-Jul-03	EPI_ISL_18292952	A/mink/Finland/506/2023	Finnish Food Authority	Finnish Food Authority	Kauppinen, Ari; Kareinen, Lauri; Tammiranta, Niina; Kantala, Tuija; Fusaro, Alice; Galiano, Monica; Ikonen, Niina; Lindh, Erika; Gadd, Tuija
EPI2513417	NA	Canada	2022-Dec-26	EPI_ISL_17494319	A/American crow/PEI/FAV-0019-01/2022	Atlantic Veterinary College, University of Prince Edward Island	Canadian Food Inspection Agency	Parma, L; Hisanaga, T; Xu, W; Alkie, T; Fisher, M; Lung, O; Yason, C; Jones, M; Berhane, Y
EPI2197231	NA	Finland	2021-Sep-01	EPI_ISL_15518270	A/otter/Finland/2860_21VIR9619-5/2021	Finnish Food Authority	Istituto Zooprofilattico Sperimentale Delle Venezie	Tammiranta, N.;Kantala, T.;Laamanen, I.;Gadd, T.;Zecchin, B.;Fusaro, A.;Schivo, A.;Salviato, A.;Palumbo, E.;Milani, A.;Giussani, E.;Pastori, A.;Monne, I.;Terregino, C.
EPI2197223	NA	Finland	2022-Feb-01	EPI_ISL_15518269	A/lynx/Finland/Vi209-22_22VIR3127-2/2022	Finnish Food Authority	Istituto Zooprofilattico Sperimentale Delle Venezie	Tammiranta, N.;Kantala, T.;Laamanen, I.;Gadd, T.;Zecchin, B.;Fusaro, A.;Schivo, A.;Salviato, A.;Palumbo, E.;Milani, A.;Giussani, E.;Pastori, A.;Monne, I.;Terregino, C.
EPI1987257	NA	Netherlands	2022-Feb-13	EPI_ISL_10220432	A/badger/Netherlands/22003078-004/2022	Wageningen Bioveterinary Research	Wageningen Bioveterinary Research	Beerens, Nancy; Harders, Frank; Pritz-Verschuren, Sylvia; Roose, Marit; Venema, Sandra; Germeraad, Evelien; Engelsma, Marc; Heutink, Rene
EPI1987233	NA	Netherlands	2022-Feb-09	EPI_ISL_10220429	A/polecat/Netherlands/22002792-005/2022	Wageningen Bioveterinary Research	Wageningen Bioveterinary Research	Beerens, Nancy; Harders, Frank; Pritz-Verschuren, Sylvia; Roose, Marit; Venema, Sandra; Germeraad, Evelien; Engelsma, Marc; Heutink, Rene
EPI1981003	NA	Netherlands	2022-Jan-24	EPI_ISL_9616266	A/polecat/Netherlands/22002047-001/2022	Wageningen Bioveterinary Research	Wageningen Bioveterinary Research	Beerens, Nancy; Harders, Frank; Pritz-Verschuren, Sylvia; Roose, Marit; Venema, Sandra; Germeraad, Evelien; Engelsma, Marc; Heutink, Rene
EPI2780164	NA	Korea, Republic of	2023-Jul-04	EPI_ISL_18102701	A/feline/South Korea/SNU-02/2023			K,Lee; M,Yeom; T,Vu; Q,Do; W,NA; M,Lee; D,Jeong; D,Cheon; D,Song
EPI2780157	NA	Korea, Republic of	2023-Jul-04	EPI_ISL_18102700	A/feline/South Korea/SNU-01/2023			K,Lee; M,Yeom; T,Vu; Q,Do; W,NA; M,Lee; D,Jeong; D,Cheon; D,Song
EPI2652229	NA	Poland	2023-Jun-17	EPI_ISL_18033408	A/caracal/Poland/H303-P/2023	National Veterinary Research Institut Poland, PIWet-PIB	National Veterinary Research Institut Poland, PIWet-PIB	Swieton,Edyta;Tarasiuk,Karolina;Wyrostek,Krzysztof;Stys-Fijol,Natalia;Domanska-Blicharz,Katarzyna
EPI2597242	NA	Peru	2023-Feb-08	EPI_ISL_17805999	A/lion/Peru/AIS0554/2023			Cruz,C.D., Conza,L.B., Espejo,V., Troncos,G., Perez,D.R., Marcelo,O.L., Schilling,M.; Tinoco,Y.
EPI3260243	NA	United States	2024-Jan-30	EPI_ISL_19094507	A/mountain lion/Montana/24_005908-001/2024	United States Department of Agriculture, Agricultural Research Service, National Animal Disease Center	United States Department of Agriculture, Agricultural Research Service, National Animal Disease Center	T.,Nguyen; C.,Hutter; A.,Markin; M.,Thomas; K.,Lantz; M.L.,Killian; G.M.,Janzen; S.,Vijendran; S.,Wagle; B.,Inderski; D.R.,Magstadt; G.,Li; D.G.,Diel; E.A.,Frye; K.M.,Dimitrov; A.K.,Swinford; A.C.,Thompson; K.R.,Snevik; D.L.,Suarez; E.,Spackman; S.M.,Lakin; S.,C; K.R.,Johnson; A.L.,Baker; Robbe-S.,Austerman; M.K.,Torchetti; Anderson,T.K.
EPI3260235	NA	United States	2024-Apr-01	EPI_ISL_19094506	A/mountain lion/Montana/24_010315-001/2024	United States Department of Agriculture, Agricultural Research Service, National Animal Disease Center	United States Department of Agriculture, Agricultural Research Service, National Animal Disease Center	T.,Nguyen; C.,Hutter; A.,Markin; M.,Thomas; K.,Lantz; M.L.,Killian; G.M.,Janzen; S.,Vijendran; S.,Wagle; B.,Inderski; D.R.,Magstadt; G.,Li; D.G.,Diel; E.A.,Frye; K.M.,Dimitrov; A.K.,Swinford; A.C.,Thompson; K.R.,Snevik; D.L.,Suarez; E.,Spackman; S.M.,Lakin; S.,C; K.R.,Johnson; A.L.,Baker; Robbe-S.,Austerman; M.K.,Torchetti; Anderson,T.K.
EPI3260218	NA	United States	2024-Mar-11	EPI_ISL_19094504	A/skunk/Montana/24_007939-001/2024	United States Department of Agriculture, Agricultural Research Service, National Animal Disease Center	United States Department of Agriculture, Agricultural Research Service, National Animal Disease Center	T.,Nguyen; C.,Hutter; A.,Markin; M.,Thomas; K.,Lantz; M.L.,Killian; G.M.,Janzen; S.,Vijendran; S.,Wagle; B.,Inderski; D.R.,Magstadt; G.,Li; D.G.,Diel; E.A.,Frye; K.M.,Dimitrov; A.K.,Swinford; A.C.,Thompson; K.R.,Snevik; D.L.,Suarez; E.,Spackman; S.M.,Lakin; S.,C; K.R.,Johnson; A.L.,Baker; Robbe-S.,Austerman; M.K.,Torchetti; Anderson,T.K.
EPI3260194	NA	United States	2024-Feb-23	EPI_ISL_19094501	A/skunk/Washington/24_005959-001/2024	United States Department of Agriculture, Agricultural Research Service, National Animal Disease Center	United States Department of Agriculture, Agricultural Research Service, National Animal Disease Center	T.,Nguyen; C.,Hutter; A.,Markin; M.,Thomas; K.,Lantz; M.L.,Killian; G.M.,Janzen; S.,Vijendran; S.,Wagle; B.,Inderski; D.R.,Magstadt; G.,Li; D.G.,Diel; E.A.,Frye; K.M.,Dimitrov; A.K.,Swinford; A.C.,Thompson; K.R.,Snevik; D.L.,Suarez; E.,Spackman; S.M.,Lakin; S.,C; K.R.,Johnson; A.L.,Baker; Robbe-S.,Austerman; M.K.,Torchetti; Anderson,T.K.
EPI3260186	NA	United States	2024-Feb-23	EPI_ISL_19094500	A/skunk/Washington/24_005959-002/2024	United States Department of Agriculture, Agricultural Research Service, National Animal Disease Center	United States Department of Agriculture, Agricultural Research Service, National Animal Disease Center	T.,Nguyen; C.,Hutter; A.,Markin; M.,Thomas; K.,Lantz; M.L.,Killian; G.M.,Janzen; S.,Vijendran; S.,Wagle; B.,Inderski; D.R.,Magstadt; G.,Li; D.G.,Diel; E.A.,Frye; K.M.,Dimitrov; A.K.,Swinford; A.C.,Thompson; K.R.,Snevik; D.L.,Suarez; E.,Spackman; S.M.,Lakin; S.,C; K.R.,Johnson; A.L.,Baker; Robbe-S.,Austerman; M.K.,Torchetti; Anderson,T.K.
EPI3260178	NA	United States	2024-Feb-23	EPI_ISL_19094499	A/skunk/Washington/24_005959-003/2024	United States Department of Agriculture, Agricultural Research Service, National Animal Disease Center	United States Department of Agriculture, Agricultural Research Service, National Animal Disease Center	T.,Nguyen; C.,Hutter; A.,Markin; M.,Thomas; K.,Lantz; M.L.,Killian; G.M.,Janzen; S.,Vijendran; S.,Wagle; B.,Inderski; D.R.,Magstadt; G.,Li; D.G.,Diel; E.A.,Frye; K.M.,Dimitrov; A.K.,Swinford; A.C.,Thompson; K.R.,Snevik; D.L.,Suarez; E.,Spackman; S.M.,Lakin; S.,C; K.R.,Johnson; A.L.,Baker; Robbe-S.,Austerman; M.K.,Torchetti; Anderson,T.K.
EPI3259739	NA	United States	2024-Mar-19	EPI_ISL_19094443	A/feline/Montana/24-009038-001/2024	National Veterinary Services Laboratories - USDA	National Veterinary Services Laboratories - USDA	Aufderhar,Matthew;Franzen,Kerrie;Killian,Mary;Lantz,Kristina;Stuber,Tod;Hicks,Jessica;Norris,Cameron
EPI3158800	NA	United States	2024-Feb-23	EPI_ISL_19014400	A/skunk/New Mexico/24-006483-001/2024	National Veterinary Services Laboratories - USDA	National Veterinary Services Laboratories - USDA	Aufderhar,Matthew;Franzen,Kerrie;Love,Emily;Killian,Mary;Lantz,Kristina;Stuber,Tod;Hicks,Jessica;Norris,Cameron
EPI2906699	NA	France	2022-Nov-01	EPI_ISL_18750109	A/tibetan blue bear/France/CHUT-0007R2/2022	Centre Hospitalier Universitaire de Toulouse	Centre Hospitalier Universitaire de Toulouse	Bessiere,P., Gaide,N., Crispo,M., Dirat,M., Croville,G., Le Loc'h,G.; Guerin,J.-L.
EPI2895494	NA	United States	2023-Aug-19	EPI_ISL_18737559	A/harbor seal/Washington/23-025744-002/2023	National Veterinary Services Laboratories - USDA	National Veterinary Services Laboratories - USDA	Franzen,Kerrie;Love,Emily;Ozella,Mikaela;Killian,Mary;Lantz,Kristina;Stuber,Tod;Hicks,Jessica;Norris,Cameron
EPI2895486	NA	United States	2023-Aug-19	EPI_ISL_18737558	A/harbor seal/Washington/23-025744-001/2023	National Veterinary Services Laboratories - USDA	National Veterinary Services Laboratories - USDA	Franzen,Kerrie;Love,Emily;Ozella,Mikaela;Killian,Mary;Lantz,Kristina;Stuber,Tod;Hicks,Jessica;Norris,Cameron
EPI2895022	NA	United States	2023-Aug-13	EPI_ISL_18731638	A/harbor seal/Washington/23-027069-002/2023	National Veterinary Services Laboratories - USDA	National Veterinary Services Laboratories - USDA	Franzen,Kerrie;Love,Emily;Ozella,Mikaela;Killian,Mary;Lantz,Kristina;Stuber,Tod;Hicks,Jessica;Norris,Cameron
EPI2894998	NA	United States	2023-Aug-25	EPI_ISL_18731622	A/harbor seal/Washington/23-025991-001/2023	National Veterinary Services Laboratories - USDA	National Veterinary Services Laboratories - USDA	Franzen,Kerrie;Love,Emily;Ozella,Mikaela;Killian,Mary;Lantz,Kristina;Stuber,Tod;Hicks,Jessica;Norris,Cameron
EPI2894990	NA	United States	2023-Aug-29	EPI_ISL_18731621	A/harbor seal/Washington/23-026504-002/2023	National Veterinary Services Laboratories - USDA	National Veterinary Services Laboratories - USDA	Franzen,Kerrie;Love,Emily;Ozella,Mikaela;Killian,Mary;Lantz,Kristina;Stuber,Tod;Hicks,Jessica;Norris,Cameron
EPI2894982	NA	United States	2023-Aug-29	EPI_ISL_18731620	A/harbor seal/Washington/23-026504-001/2023	National Veterinary Services Laboratories - USDA	National Veterinary Services Laboratories - USDA	Franzen,Kerrie;Love,Emily;Ozella,Mikaela;Killian,Mary;Lantz,Kristina;Stuber,Tod;Hicks,Jessica;Norris,Cameron
EPI2856617	NA	Canada	2023-Apr-20	EPI_ISL_18665588	A/Striped_Skunk/BC/AIVPHL-1082/2023	B.C. Centre for Disease Control	Public Health Agency of Canada	Himsworth, Chelsea; Prystajecky,Natalie; Tyson,John; Jassem,Agatha; Kuchinski,Kevin; Coombe, Michelle; Lee,Tracy; Azana,Rob; Fung,Janet; Chan,Michael; Cheung,Branco; Caleta,Jessica; Tsang,Frankie; Yang,Kevin; Russell,Shannon; Zlosnik,James; Hoang,Linda
EPI2856594	NA	Canada	2023-Apr-20	EPI_ISL_18665585	A/Striped_Skunk/BC/AIVPHL-1080/2023	B.C. Centre for Disease Control	Public Health Agency of Canada	Himsworth, Chelsea; Prystajecky,Natalie; Tyson,John; Jassem,Agatha; Kuchinski,Kevin; Coombe, Michelle; Lee,Tracy; Azana,Rob; Fung,Janet; Chan,Michael; Cheung,Branco; Caleta,Jessica; Tsang,Frankie; Yang,Kevin; Russell,Shannon; Zlosnik,James; Hoang,Linda
EPI2856218	NA	Canada	2023-Mar-09	EPI_ISL_18665535	A/Striped_Skunk/BC/AIVPHL-977/2023	B.C. Centre for Disease Control	Public Health Agency of Canada	Himsworth, Chelsea; Prystajecky,Natalie; Tyson,John; Jassem,Agatha; Kuchinski,Kevin; Coombe, Michelle; Lee,Tracy; Azana,Rob; Fung,Janet; Chan,Michael; Cheung,Branco; Caleta,Jessica; Tsang,Frankie; Yang,Kevin; Russell,Shannon; Zlosnik,James; Hoang,Linda
EPI2856171	NA	Canada	2023-Mar-06	EPI_ISL_18665529	A/Striped_Skunk/BC/AIVPHL-975/2023	B.C. Centre for Disease Control	Public Health Agency of Canada	Himsworth, Chelsea; Prystajecky,Natalie; Tyson,John; Jassem,Agatha; Kuchinski,Kevin; Coombe, Michelle; Lee,Tracy; Azana,Rob; Fung,Janet; Chan,Michael; Cheung,Branco; Caleta,Jessica; Tsang,Frankie; Yang,Kevin; Russell,Shannon; Zlosnik,James; Hoang,Linda
EPI2856147	NA	Canada	2023-Mar-06	EPI_ISL_18665526	A/Striped_Skunk/BC/AIVPHL-972/2023	B.C. Centre for Disease Control	Public Health Agency of Canada	Himsworth, Chelsea; Prystajecky,Natalie; Tyson,John; Jassem,Agatha; Kuchinski,Kevin; Coombe, Michelle; Lee,Tracy; Azana,Rob; Fung,Janet; Chan,Michael; Cheung,Branco; Caleta,Jessica; Tsang,Frankie; Yang,Kevin; Russell,Shannon; Zlosnik,James; Hoang,Linda
EPI2816122	NA	Denmark	2023-Apr-29	EPI_ISL_18594303	A_red_fox_Denmark_08303-1.01_2023-04-29	Statens Serumm Institute	Statens Serum Institute	Hjulsager,C;Liang,Y
EPI2512592	NA	Canada	2022-Jun-14	EPI_ISL_17478645	A/Black Bear/QC/FAV-0902/2022	Laboratoire de sant√© animale Minist√®re de l'Agriculture, des P√™cheries et de l'A	Canadian Food Inspection Agency	Koziuk, J; Hisanaga, T; Xu, W; Alkie, T; Lung, O; Fisher, M; Nadeau, M.S; Lair, S; Berhane, Y
EPI2512524	NA	Canada	2022-Jun-24	EPI_ISL_17478584	A/Black Bear/QC/FAV-0935/2022	Laboratoire de sant√© animale Minist√®re de l'Agriculture, des P√™cheries et de l'A	Canadian Food Inspection Agency	Koziuk, J; Hisanaga, T; Xu, W; Alkie, T; Lung, O; Fisher, M; Nadeau, M.S; Lair, S; Berhane, Y
EPI2509906	NA	United Kingdom	2022-Jun-19	EPI_ISL_17465835	A/harbour_seal/Scotland/054948/2022	Animal and Plant Health Agency (APHA)	Animal and Plant Health Agency (APHA)
EPI2509898	NA	United Kingdom	2023-Feb-20	EPI_ISL_17465834	A/common_dolphin/England/040499/2023	Animal and Plant Health Agency (APHA)	Animal and Plant Health Agency (APHA)
EPI2509890	NA	United Kingdom	2023-Feb-20	EPI_ISL_17465833	A/common_dolphin/Wales/040498/2023	Animal and Plant Health Agency (APHA)	Animal and Plant Health Agency (APHA)
EPI2509882	NA	United Kingdom	2023-Feb-06	EPI_ISL_17465832	A/harbour_porpoise/England/040497/2023	Animal and Plant Health Agency (APHA)	Animal and Plant Health Agency (APHA)
EPI2507004	NA	United States	2023-Jan-27	EPI_ISL_17424646	A/striped skunk/Kansas/W23-094/2023	St. Jude Center of Excellence for Influenza Research and Response - CEIRR Influenza Data Processing and Communication Center	St. Jude Center of Excellence for Influenza Research and Response - CEIRR Influenza Data Processing and Communication Center	Poulson,R., Stallknecht,D., Rubrum,A., Jeevan,T., Walker,D. and Webby,R.
EPI2506852	NA	United States	2022-Jul-07	EPI_ISL_17424627	A/harbor seal/Maine/MME-185-ns/2022			Fauquier,D.; Doughty,L.A.; Rubrum,A.; Jeevan,T.; Walker,D.; Webby,R.
EPI2506844	NA	United States	2022-Jun-24	EPI_ISL_17424626	A/harbor seal/Maine/MME-117-ns/2022			Fauquier,D.; Doughty,L.A.; Rubrum,A.; Jeevan,T.; Walker,D.; Webby,R.
EPI2506836	NA	United States	2022-Jul-02	EPI_ISL_17424625	A/harbor seal/Maine/MME-150-L/2022			Fauquier,D.; Doughty,L.A.; Rubrum,A.; Jeevan,T.; Walker,D.; Webby,R.
EPI2506828	NA	United States	2022-Jul-07	EPI_ISL_17424624	A/harbor seal/Maine/MME-185-L/2022	St. Jude Center of Excellence for Influenza Research and Response - CEIRR Influenza Data Processing and Communication Center	St. Jude Center of Excellence for Influenza Research and Response - CEIRR Influenza Data Processing and Communication Center	Fauquier,D., Doughty,L.A., Rubrum,A., Jeevan,T., Walker,D. and Webby,R.
EPI2506820	NA	United States	2022-Jul-02	EPI_ISL_17424623	A/harbor seal/Maine/MME-150-ns/2022			Fauquier,D.; Doughty,L.A.; Rubrum,A.; Jeevan,T.; Walker,D.; Webby,R.
EPI2506813	NA	United States	2022-Jul-02	EPI_ISL_17424622	A/harbor seal/Maine/MME-147-L/2022	St. Jude Center of Excellence for Influenza Research and Response - CEIRR Influenza Data Processing and Communication Center	St. Jude Center of Excellence for Influenza Research and Response - CEIRR Influenza Data Processing and Communication Center	Fauquier,D., Doughty,L.A., Rubrum,A., Jeevan,T., Walker,D. and Webby,R.
EPI2473783	NA	United States	2022-Jul-22	EPI_ISL_17260689	A/skunk/Idaho/22-023547-001/2022	National Veterinary Services Laboratories - USDA	National Veterinary Services Laboratories - USDA	Chinh,Thanh;Franzen,Kerrie;Love,Emily;Killian,Mary;Koster,Leo;Lantz,Kristina;Stuber,Tod;Hicks,Jessica;Norris,Cameron
EPI2473775	NA	United States	2022-Jul-06	EPI_ISL_17260688	A/raccoon/Michigan/22-021733-010/2022	National Veterinary Services Laboratories - USDA	National Veterinary Services Laboratories - USDA	Chinh,Thanh;Franzen,Kerrie;Love,Emily;Killian,Mary;Koster,Leo;Lantz,Kristina;Stuber,Tod;Hicks,Jessica;Norris,Cameron
EPI2473702	NA	United States	2022-Apr-14	EPI_ISL_17260683	A/fisher/Wisconsin/22-019946-001/2022	National Veterinary Services Laboratories - USDA	National Veterinary Services Laboratories - USDA	Chinh,Thanh;Franzen,Kerrie;Love,Emily;Killian,Mary;Koster,Leo;Lantz,Kristina;Stuber,Tod;Hicks,Jessica;Norris,Cameron
EPI2473687	NA	United States	2022-Jun-07	EPI_ISL_17260682	A/skunk/Washington/22-019274-004/2022	National Veterinary Services Laboratories - USDA	National Veterinary Services Laboratories - USDA	Chinh,Thanh;Franzen,Kerrie;Love,Emily;Killian,Mary;Koster,Leo;Lantz,Kristina;Stuber,Tod;Hicks,Jessica;Norris,Cameron
EPI2473659	NA	United States	2022-Jun-06	EPI_ISL_17260680	A/skunk/Idaho/22-018976-004/2022	National Veterinary Services Laboratories - USDA	National Veterinary Services Laboratories - USDA	Chinh,Thanh;Franzen,Kerrie;Love,Emily;Killian,Mary;Koster,Leo;Lantz,Kristina;Stuber,Tod;Hicks,Jessica;Norris,Cameron
EPI2473589	NA	United States	2022-May-03	EPI_ISL_17260675	A/coyote/Michigan/22-017507-005/2022	National Veterinary Services Laboratories - USDA	National Veterinary Services Laboratories - USDA	Chinh,Thanh;Franzen,Kerrie;Love,Emily;Killian,Mary;Koster,Leo;Lantz,Kristina;Stuber,Tod;Hicks,Jessica;Norris,Cameron
EPI2473533	NA	United States	2022-May-25	EPI_ISL_17260671	A/Virginia opossum/Iowa/22-016780-003/2022	National Veterinary Services Laboratories - USDA	National Veterinary Services Laboratories - USDA	Chinh,Thanh;Franzen,Kerrie;Love,Emily;Killian,Mary;Koster,Leo;Lantz,Kristina;Stuber,Tod;Hicks,Jessica;Norris,Cameron
EPI2469500	NA	Belgium	2023-Mar-02	EPI_ISL_17246921	A/Mustela_putorius/Belgium/01922_0001/2023	Sciensano - Animal Infectious Diseases	Sciensano, Department of Animal Infectious Diseases	Van Borm, Steven; Roupie, Virginie; Hostyn, Pierre; Mathijs, Elisabeth; Lambrecht, Benedicte; Steensels, Mieke
EPI2274968	NA	Canada	2022-May-30	EPI_ISL_16367971	A/Striped Skunk/SK/FAV-0824-01/2022	Western College of Veterinary Medicine, University of Saskatchewan	Canadian Food Inspection Agency
EPI2260733	NA	United States	2022-Jan-01	EPI_ISL_16271848	A/black bear/Alaska/22-036396-001/2022	National Veterinary Services Laboratories - USDA	National Veterinary Services Laboratories - USDA	Chinh,Thanh;Love, Emily;Franzen,Kerrie;Killian,Mary;Koster,Leo;Lantz,Kristina;Stuber,Tod;Hicks,Jessica
EPI2260629	NA	United States	2022-Nov-04	EPI_ISL_16271835	A/striped skunk/Idaho/22-037165-002/2022	National Veterinary Services Laboratories - USDA	National Veterinary Services Laboratories - USDA	Chinh,Thanh;Love, Emily;Franzen,Kerrie;Killian,Mary;Koster,Leo;Lantz,Kristina;Stuber,Tod;Hicks,Jessica
EPI2257438	NA	United States	2022-Mar-30	EPI_ISL_16212269	A/bottlenose dolphin/Florida/UFTt2203/2022			Murawski,A.; Allison,A.; Ossiboff,R.; Fabrizio,T.; Jeevan,T.; Mukherjee,N.; Killian,M.L.; Torchetti,M.; Walsh,M.; Webby,R.
EPI2235586	NA	Canada	2022-May-18	EPI_ISL_16003268	A/Skunk/MB/FAV-470/2022	Manitoba Agriculture	Canadian Food Inspection Agency	Alkie, Tamiru; Cox, Sherri; Pople, Neil; Xu, Wanhong; Hisanaga, Tamiko; Suderman, Suderman; Koziuk, Janice; Kruczkiewicz, Peter; Nguyen, Hoang Hai; Fisher, Mathew; Lung, Oliver; Berhane, Yohannes
EPI2182142	NA	United States	2022-Mar-30	EPI_ISL_15078255	A/dolphin/Florida/22-025319-002/2022	National Veterinary Services Laboratories - USDA	National Veterinary Services Laboratories - USDA	Chinh,Thanh;Love, Emily;Franzen,Kerrie;Killian,Mary;Koster,Leo;Lantz,Kristina;Stuber,Tod;Hicks,Jessica
EPI2182134	NA	United States	2022-Jun-07	EPI_ISL_15078254	A/skunk/Washington/22-019274-001/2022	National Veterinary Services Laboratories - USDA	National Veterinary Services Laboratories - USDA	Chinh,Thanh;Love, Emily;Franzen,Kerrie;Killian,Mary;Koster,Leo;Lantz,Kristina;Stuber,Tod;Hicks,Jessica
EPI2182118	NA	United States	2022-Jun-08	EPI_ISL_15078252	A/raccoon/Washington/22-018406-002/2022	National Veterinary Services Laboratories - USDA	National Veterinary Services Laboratories - USDA	Chinh,Thanh;Love, Emily;Franzen,Kerrie;Killian,Mary;Koster,Leo;Lantz,Kristina;Stuber,Tod;Hicks,Jessica
EPI2182102	NA	United States	2022-May-25	EPI_ISL_15078250	A/Virginia opossum/Iowa/22-016780-001/2022	National Veterinary Services Laboratories - USDA	National Veterinary Services Laboratories - USDA	Chinh,Thanh;Love, Emily;Franzen,Kerrie;Killian,Mary;Koster,Leo;Lantz,Kristina;Stuber,Tod;Hicks,Jessica
EPI2182086	NA	United States	2022-May-24	EPI_ISL_15078248	A/bobcat/Wisconsin/22-016051-001/2022	National Veterinary Services Laboratories - USDA	National Veterinary Services Laboratories - USDA	Chinh,Thanh;Love, Emily;Franzen,Kerrie;Killian,Mary;Koster,Leo;Lantz,Kristina;Stuber,Tod;Hicks,Jessica
EPI2181754	NA	United States	2022-Mar-30	EPI_ISL_15069397	A/bottlenose dolphin/Florida/UFTt2203/2022	University of Florida, College of Veterinary Medicine	St. Jude Children's Research Hospital	Murawski, Allison; Allison, Andrew; Ossiboff, Robert; Fabrizio, Thomas; Jeevan, Trushar; Killian, Mary Lea; Torchetti, Mia; Walsh, Michael; Webby, Richard
EPI2158647	NA	United Kingdom	2022-Jan-01	EPI_ISL_14864642	A/otter/Scotland/M100366/2022	Animal and Plant Health Agency (APHA)	Animal and Plant Health Agency (APHA)
EPI2158639	NA	United Kingdom	2022-Jan-01	EPI_ISL_14864641	A/otter/Scotland/M100839/2022	Animal and Plant Health Agency (APHA)	Animal and Plant Health Agency (APHA)
EPI2109945	NA	Japan	2022-Apr-01	EPI_ISL_14070455	A/tanuki/Hokkaido/1/2022	Graduate School of Veterinary Medicine, Hokkaido University	Graduate School of Veterinary Medicine, Hokkaido University	Yoshihiro, Sakoda; Takahiro, Hiono; Norikazu, Isoda
EPI2455333	NA	Germany	2023-Feb-27	EPI_ISL_17167249	A/grey seal/Germany-SH/AI01973/2023	Landeslabor Schleswig-Holstein	Friedrich-Loeffler-Institut
EPI2398410	NA	United Kingdom	2022-Jul-25	EPI_ISL_16904554	A/Harbour_Seal/Scotland/162925/2022	Animal and Plant Health Agency (APHA)	Animal and Plant Health Agency (APHA)
EPI2398402	NA	United Kingdom	2022-Mar-12	EPI_ISL_16904553	A/Harbour_Seal/Scotland/162919/2022	Animal and Plant Health Agency (APHA)	Animal and Plant Health Agency (APHA)
EPI2310443	NA	United States	2022-Jul-15	EPI_ISL_16632542	A/harbor seal/Maine/22-025072-002/2022	Cummings School of Veterinary Medicine at Tufts University	Cummings School of Veterinary Medicine at Tufts University	Chinh,Thanh; Franzen,Kerrie; Love,Emily; Killian,Mary; Lantz,Kristina; Hicks,Jessica; Norris, Cameron; Stuber,Tod; Sawatzki, Kaitlin; Puryear, Wendy; Foss, Alexa; Doughty,Linda; Runstadler, Jonathan
EPI2310435	NA	United States	2022-Jul-09	EPI_ISL_16632541	A/harbor seal/Maine/22-022528-008/2022	Cummings School of Veterinary Medicine at Tufts University	Cummings School of Veterinary Medicine at Tufts University	Chinh,Thanh; Franzen,Kerrie; Love,Emily; Killian,Mary; Lantz,Kristina; Hicks,Jessica; Norris, Cameron; Stuber,Tod; Sawatzki, Kaitlin; Puryear, Wendy; Foss, Alexa; Doughty,Linda; Runstadler, Jonathan
EPI2310427	NA	United States	2022-Jul-09	EPI_ISL_16632540	A/harbor seal/Maine/22-022528-006/2022	Cummings School of Veterinary Medicine at Tufts University	Cummings School of Veterinary Medicine at Tufts University	Chinh,Thanh; Franzen,Kerrie; Love,Emily; Killian,Mary; Lantz,Kristina; Hicks,Jessica; Norris, Cameron; Stuber,Tod; Sawatzki, Kaitlin; Puryear, Wendy; Foss, Alexa; Doughty,Linda; Runstadler, Jonathan
EPI2310419	NA	United States	2022-Jul-08	EPI_ISL_16632539	A/harbor seal/Maine/22-022528-003/2022	Cummings School of Veterinary Medicine at Tufts University	Cummings School of Veterinary Medicine at Tufts University	Chinh,Thanh; Franzen,Kerrie; Love,Emily; Killian,Mary; Lantz,Kristina; Hicks,Jessica; Norris, Cameron; Stuber,Tod; Sawatzki, Kaitlin; Puryear, Wendy; Foss, Alexa; Doughty,Linda; Runstadler, Jonathan
EPI2110524	NA	United States	2022-Jun-29	EPI_ISL_14098924	A/harbor seal/Maine/22-020983-007/2022	National Veterinary Services Laboratories - USDA	National Veterinary Services Laboratories - USDA	Chinh,Thanh;Franzen,Kerrie;Love, Emily;Killian,Mary;Koster,Leo;Lantz,Kristina;Torchetti,Mia;Stuber,Tod;Hicks,Jessica
EPI2110516	NA	United States	2022-Jun-29	EPI_ISL_14098923	A/harbor seal/Maine/22-020983-006/2022	National Veterinary Services Laboratories - USDA	National Veterinary Services Laboratories - USDA	Chinh,Thanh;Franzen,Kerrie;Love, Emily;Killian,Mary;Koster,Leo;Lantz,Kristina;Torchetti,Mia;Stuber,Tod;Hicks,Jessica
EPI2110508	NA	United States	2022-Jun-29	EPI_ISL_14098922	A/grey seal/Maine/22-020983-003/2022	National Veterinary Services Laboratories - USDA	National Veterinary Services Laboratories - USDA	Chinh,Thanh;Franzen,Kerrie;Love, Emily;Killian,Mary;Koster,Leo;Lantz,Kristina;Torchetti,Mia;Stuber,Tod;Hicks,Jessica
EPI2110500	NA	United States	2022-Jun-29	EPI_ISL_14098921	A/harbor seal/Maine/22-020983-002/2022	National Veterinary Services Laboratories - USDA	National Veterinary Services Laboratories - USDA	Chinh,Thanh;Franzen,Kerrie;Love, Emily;Killian,Mary;Koster,Leo;Lantz,Kristina;Torchetti,Mia;Stuber,Tod;Hicks,Jessica
EPI2110492	NA	United States	2022-Jun-29	EPI_ISL_14098920	A/harbor seal/Maine/22-020983-001/2022	National Veterinary Services Laboratories - USDA	National Veterinary Services Laboratories - USDA	Chinh,Thanh;Franzen,Kerrie;Love, Emily;Killian,Mary;Koster,Leo;Lantz,Kristina;Torchetti,Mia;Stuber,Tod;Hicks,Jessica
EPI2110484	NA	United States	2022-Jun-27	EPI_ISL_14098919	A/harbor seal/Maine/22-020455-005/2022	National Veterinary Services Laboratories - USDA	National Veterinary Services Laboratories - USDA	Chinh,Thanh;Franzen,Kerrie;Love, Emily;Killian,Mary;Koster,Leo;Lantz,Kristina;Torchetti,Mia;Stuber,Tod;Hicks,Jessica
EPI2110476	NA	United States	2022-Jun-26	EPI_ISL_14098918	A/harbor seal/Maine/22-020455-004/2022	National Veterinary Services Laboratories - USDA	National Veterinary Services Laboratories - USDA	Chinh,Thanh;Franzen,Kerrie;Love, Emily;Killian,Mary;Koster,Leo;Lantz,Kristina;Torchetti,Mia;Stuber,Tod;Hicks,Jessica
EPI2110468	NA	United States	2022-Jun-22	EPI_ISL_14098917	A/harbor seal/Maine/22-020455-003/2022	National Veterinary Services Laboratories - USDA	National Veterinary Services Laboratories - USDA	Chinh,Thanh;Franzen,Kerrie;Love, Emily;Killian,Mary;Koster,Leo;Lantz,Kristina;Torchetti,Mia;Stuber,Tod;Hicks,Jessica
EPI2110460	NA	United States	2022-Jun-24	EPI_ISL_14098916	A/harbor seal/Maine/22-020455-002/2022	National Veterinary Services Laboratories - USDA	National Veterinary Services Laboratories - USDA	Chinh,Thanh;Franzen,Kerrie;Love, Emily;Killian,Mary;Koster,Leo;Lantz,Kristina;Torchetti,Mia;Stuber,Tod;Hicks,Jessica
EPI2110452	NA	United States	2022-Jun-24	EPI_ISL_14098915	A/harbor seal/Maine/22-020455-001/2022	National Veterinary Services Laboratories - USDA	National Veterinary Services Laboratories - USDA	Chinh,Thanh;Franzen,Kerrie;Love, Emily;Killian,Mary;Koster,Leo;Lantz,Kristina;Torchetti,Mia;Stuber,Tod;Hicks,Jessica
EPI2291517	NA	Spain	2022-Oct-26	EPI_ISL_16507096	A/mink/Spain/22VIR12774-14_3869-3/2022	Istituto Zooprofilattico Sperimentale delle Venezie, EU/OIE/Reference Laboratory and FAO Reference Centre for AI and ND	Istituto Zooprofilattico Sperimentale Delle Venezie	Ruano,M.J.; Rocha,A.; Sanchez,A.; Aguero,M.; Pastori, A.; Zecchin, B.; Fusaro, A.; Schivo, A.; Salviato, A.; Palumbo, E.; Giussani, E.; Monne, I.; Terregino, C.
EPI2291509	NA	Spain	2022-Oct-26	EPI_ISL_16507095	A/mink/Spain/22VIR12774-13_3869-2/2022	Istituto Zooprofilattico Sperimentale delle Venezie, EU/OIE/Reference Laboratory and FAO Reference Centre for AI and ND	Istituto Zooprofilattico Sperimentale Delle Venezie	Ruano,M.J.; Rocha,A.; Sanchez,A.; Aguero,M.; Pastori, A.; Zecchin, B.; Fusaro, A.; Schivo, A.; Salviato, A.; Palumbo, E.; Giussani, E.; Monne, I.; Terregino, C.
EPI2236194	NA	Canada	2022-May-19	EPI_ISL_16013982	A/Wild Mink/ON/FAV-0529-01/2022	Ontario Veterinary College, University of Guelph	Canadian Food Inspection Agency	Alkie, Tamiru; Cox, Sherri; Ojkic, Davor; Stevens, Brian; Xu, Wanhong; Hisanaga, Tamiko; Suderman, Suderman; Koziuk, Janice; Kruczkiewicz, Peter; Nguyen, Hoang Hai; Fisher, Mathew; Lung, Oliver; Berhane, Yohannes
EPI2220620	NA	Spain	2022-Oct-18	EPI_ISL_15878542	A/Mink/Spain/3691-3_22VIR10586-9/2022	Laboratorio Central de Veterinaria	Istituto Zooprofilattico Sperimentale delle Venezie	Ruano, M.J.; Rocha, A.; Sanchez, A.; Aguero, M; Barbierato, G.; Zecchin, B.; Fusaro, A.; Schivo, A.; Salviato, A.; Palumbo, E.; Giussani, E.; Pastori, A.; Monne, I.; Terregino, C.
EPI2220612	NA	Spain	2022-Oct-18	EPI_ISL_15878541	A/Mink/Spain/3691-2_22VIR10586-8/2022	Laboratorio Central de Veterinaria	Istituto Zooprofilattico Sperimentale delle Venezie	Ruano, M.J.; Rocha, A.; Sanchez, A.; Aguero, M; Barbierato, G.; Zecchin, B.; Fusaro, A.; Schivo, A.; Salviato, A.; Palumbo, E.; Giussani, E.; Pastori, A.; Monne, I.; Terregino, C.
EPI2220604	NA	Spain	2022-Oct-18	EPI_ISL_15878540	A/Mink/Spain/3691-10_22VIR10586-11/2022	Laboratorio Central de Veterinaria	Istituto Zooprofilattico Sperimentale delle Venezie	Ruano, M.J.; Rocha, A.; Sanchez, A.; Aguero, M; Barbierato, G.; Zecchin, B.; Fusaro, A.; Schivo, A.; Salviato, A.; Palumbo, E.; Giussani, E.; Pastori, A.; Monne, I.; Terregino, C.
EPI2220596	NA	Spain	2022-Oct-18	EPI_ISL_15878539	A/Mink/Spain/3691-8_22VIR10586-10/2022	Laboratorio Central de Veterinaria	Istituto Zooprofilattico Sperimentale delle Venezie	Ruano, M.J.; Rocha, A.; Sanchez, A.; Aguero, M; Barbierato, G.; Zecchin, B.; Fusaro, A.; Schivo, A.; Salviato, A.; Palumbo, E.; Giussani, E.; Pastori, A.; Monne, I.; Terregino, C.
EPI2652299	NA	Poland	2023-Jan-01	EPI_ISL_18033418	A/domestic_cat/Poland/H322-M/2023	National Veterinary Research Institut Poland, PIWet-PIB	National Veterinary Research Institut Poland, PIWet-PIB	Swieton,Edyta;Tarasiuk,Karolina;Wyrostek,Krzysztof;Stys-Fijol,Natalia;Domanska-Blicharz,Katarzyna
EPI2652292	NA	Poland	2023-Jan-01	EPI_ISL_18033417	A/domestic_cat/Poland/H321-M/2023	National Veterinary Research Institut Poland, PIWet-PIB	National Veterinary Research Institut Poland, PIWet-PIB	Swieton,Edyta;Tarasiuk,Karolina;Wyrostek,Krzysztof;Stys-Fijol,Natalia;Domanska-Blicharz,Katarzyna
EPI2652285	NA	Poland	2023-Jan-01	EPI_ISL_18033416	A/domestic_cat/Poland/H320-M/2023	National Veterinary Research Institut Poland, PIWet-PIB	National Veterinary Research Institut Poland, PIWet-PIB	Swieton,Edyta;Tarasiuk,Karolina;Wyrostek,Krzysztof;Stys-Fijol,Natalia;Domanska-Blicharz,Katarzyna
EPI2652278	NA	Poland	2023-Jan-01	EPI_ISL_18033415	A/domestic_cat/Poland/H319-M/2023	National Veterinary Research Institut Poland, PIWet-PIB	National Veterinary Research Institut Poland, PIWet-PIB	Swieton,Edyta;Tarasiuk,Karolina;Wyrostek,Krzysztof;Stys-Fijol,Natalia;Domanska-Blicharz,Katarzyna
EPI2652271	NA	Poland	2023-Jul-06	EPI_ISL_18033414	A/domestic_cat/Poland/H314-W3/2023	National Veterinary Research Institut Poland, PIWet-PIB	National Veterinary Research Institut Poland, PIWet-PIB	Swieton,Edyta;Tarasiuk,Karolina;Wyrostek,Krzysztof;Stys-Fijol,Natalia;Domanska-Blicharz,Katarzyna
EPI2652264	NA	Poland	2023-Jan-01	EPI_ISL_18033413	A/domestic_cat/Poland/H304-M2/2023	National Veterinary Research Institut Poland, PIWet-PIB	National Veterinary Research Institut Poland, PIWet-PIB	Swieton,Edyta;Tarasiuk,Karolina;Wyrostek,Krzysztof;Stys-Fijol,Natalia;Domanska-Blicharz,Katarzyna
EPI2652257	NA	Poland	2023-Jan-01	EPI_ISL_18033412	A/domestic_cat/Poland/H304-M1/2023	National Veterinary Research Institut Poland, PIWet-PIB	National Veterinary Research Institut Poland, PIWet-PIB	Swieton,Edyta;Tarasiuk,Karolina;Wyrostek,Krzysztof;Stys-Fijol,Natalia;Domanska-Blicharz,Katarzyna
EPI2652250	NA	Poland	2023-Jan-01	EPI_ISL_18033411	A/domestic_cat/Poland/H299-N/2023	National Veterinary Research Institut Poland, PIWet-PIB	National Veterinary Research Institut Poland, PIWet-PIB	Swieton,Edyta;Tarasiuk,Karolina;Wyrostek,Krzysztof;Stys-Fijol,Natalia;Domanska-Blicharz,Katarzyna
EPI2652243	NA	Poland	2023-Jan-01	EPI_ISL_18033410	A/domestic_cat/Poland/H293-N/2023	National Veterinary Research Institut Poland, PIWet-PIB	National Veterinary Research Institut Poland, PIWet-PIB	Swieton,Edyta;Tarasiuk,Karolina;Wyrostek,Krzysztof;Stys-Fijol,Natalia;Domanska-Blicharz,Katarzyna
EPI2652236	NA	Poland	2023-Jan-01	EPI_ISL_18033409	A/domestic_cat/Poland/H275k3-M/2023	National Veterinary Research Institut Poland, PIWet-PIB	National Veterinary Research Institut Poland, PIWet-PIB	Swieton,Edyta;Tarasiuk,Karolina;Wyrostek,Krzysztof;Stys-Fijol,Natalia;Domanska-Blicharz,Katarzyna
EPI2616229	NA	Poland	2023-Jun-26	EPI_ISL_17971998	A/domestic_cat/Poland/H264-G/2023(H5N1)	National Veterinary Research Institut Poland, PIWet-PIB	National Veterinary Research Institut Poland, PIWet-PIB	Swieton, E.;Domanska-Blicharz, K.;Tarasiuk, K.; Wyrostek, K.;Stys-Fijol, N.
EPI2616221	NA	Poland	2023-Jun-26	EPI_ISL_17971997	A/domestic_cat/Poland/H277-W1/2023(H5N1)	National Veterinary Research Institut Poland, PIWet-PIB	National Veterinary Research Institut Poland, PIWet-PIB	Swieton, E.;Domanska-Blicharz, K.;Tarasiuk, K.; Wyrostek, K.;Stys-Fijol, N.
EPI2616213	NA	Poland	2023-Jun-25	EPI_ISL_17971996	A/domestic_cat/Poland/H271-W/2023(H5N1)	National Veterinary Research Institut Poland, PIWet-PIB	National Veterinary Research Institut Poland, PIWet-PIB	Swieton, E.;Domanska-Blicharz, K.;Tarasiuk, K.; Wyrostek, K.;Stys-Fijol, N.
EPI2616205	NA	Poland	2023-Jun-25	EPI_ISL_17971995	A/domestic_cat/Poland/H270-W/2023(H5N1)	National Veterinary Research Institut Poland, PIWet-PIB	National Veterinary Research Institut Poland, PIWet-PIB	Swieton, E.;Domanska-Blicharz, K.;Tarasiuk, K.; Wyrostek, K.;Stys-Fijol, N.
EPI2616197	NA	Poland	2023-Jun-25	EPI_ISL_17971994	A/domestic_cat/Poland/H267-W/2023(H5N1)	National Veterinary Research Institut Poland, PIWet-PIB	National Veterinary Research Institut Poland, PIWet-PIB	Swieton, E.;Domanska-Blicharz, K.;Tarasiuk, K.; Wyrostek, K.;Stys-Fijol, N.
EPI2616189	NA	Poland	2023-Jun-19	EPI_ISL_17971993	A/domestic_cat/Poland/H266-W/2023(H5N1)	National Veterinary Research Institut Poland, PIWet-PIB	National Veterinary Research Institut Poland, PIWet-PIB	Swieton, E.;Domanska-Blicharz, K.;Tarasiuk, K.; Wyrostek, K.;Stys-Fijol, N.
EPI2616181	NA	Poland	2023-Jun-26	EPI_ISL_17971992	A/domestic_cat/Poland/H263-G/2023(H5N1)	National Veterinary Research Institut Poland, PIWet-PIB	National Veterinary Research Institut Poland, PIWet-PIB	Swieton, E.;Domanska-Blicharz, K.;Tarasiuk, K.; Wyrostek, K.;Stys-Fijol, N.
EPI2616173	NA	Poland	2023-Jun-24	EPI_ISL_17971991	A/domestic_cat/Poland/H257-G/2023(H5N1)	National Veterinary Research Institut Poland, PIWet-PIB	National Veterinary Research Institut Poland, PIWet-PIB	Swieton, E.;Domanska-Blicharz, K.;Tarasiuk, K.; Wyrostek, K.;Stys-Fijol, N.
EPI2616165	NA	Poland	2023-Jun-24	EPI_ISL_17971990	A/domestic_cat/Poland/H256-G/2023(H5N1)	National Veterinary Research Institut Poland, PIWet-PIB	National Veterinary Research Institut Poland, PIWet-PIB	Swieton, E.;Domanska-Blicharz, K.;Tarasiuk, K.; Wyrostek, K.;Stys-Fijol, N.
EPI2616157	NA	Poland	2023-Jun-21	EPI_ISL_17971989	A/domestic_cat/Poland/H255-M/2023(H5N1)	National Veterinary Research Institut Poland, PIWet-PIB	National Veterinary Research Institut Poland, PIWet-PIB	Swieton, E.;Domanska-Blicharz, K.;Tarasiuk, K.; Wyrostek, K.;Stys-Fijol, N.
EPI2610825	NA	Poland	2023-Jun-19	EPI_ISL_17951056	A/domestic_cat/Poland/Kot1/2023	National Veterinary Research Institut Poland, PIWet-PIB	National Veterinary Research Institut Poland, PIWet-PIB	Edyta,≈öwiƒôto≈Ñ; Katarzyna,Doma≈Ñska-Blicharz; Aleksandra,Giza; Marta,Pietruk; Karolina,Tarasiuk; Krzysztof,Wyrostek; Natalia, Sty≈õ-Fijo≈Ç
EPI2610815	NA	Poland	2023-Jun-20	EPI_ISL_17951055	A/domestic_cat/Poland/H247/2023	National Veterinary Research Institut Poland, PIWet-PIB	National Veterinary Research Institut Poland, PIWet-PIB	Edyta,≈öwiƒôto≈Ñ; Katarzyna,Doma≈Ñska-Blicharz; Aleksandra,Giza; Marta,Pietruk; Karolina,Tarasiuk; Krzysztof,Wyrostek; Natalia, Sty≈õ-Fijo≈Ç
EPI2610807	NA	Poland	2023-Jun-15	EPI_ISL_17951054	A/domestic_cat/Poland/H248/2023	National Veterinary Research Institut Poland, PIWet-PIB	National Veterinary Research Institut Poland, PIWet-PIB	Edyta,≈öwiƒôto≈Ñ; Katarzyna,Doma≈Ñska-Blicharz; Aleksandra,Giza; Marta,Pietruk; Karolina,Tarasiuk; Krzysztof,Wyrostek; Natalia, Sty≈õ-Fijo≈Ç
EPI2610799	NA	Poland	2023-Jun-22	EPI_ISL_17951053	A/domestic_cat/Poland/H254/2023	National Veterinary Research Institut Poland, PIWet-PIB	National Veterinary Research Institut Poland, PIWet-PIB	Edyta,≈öwiƒôto≈Ñ; Katarzyna,Doma≈Ñska-Blicharz; Aleksandra,Giza; Marta,Pietruk; Karolina,Tarasiuk; Krzysztof,Wyrostek; Natalia, Sty≈õ-Fijo≈Ç
EPI2610783	NA	Poland	2023-Jun-22	EPI_ISL_17951051	A/domestic_cat/Poland/H252/2023	National Veterinary Research Institut Poland, PIWet-PIB	National Veterinary Research Institut Poland, PIWet-PIB	Edyta,≈öwiƒôto≈Ñ; Katarzyna,Doma≈Ñska-Blicharz; Aleksandra,Giza; Marta,Pietruk; Karolina,Tarasiuk; Krzysztof,Wyrostek; Natalia, Sty≈õ-Fijo≈Ç
EPI2610775	NA	Poland	2023-Jun-22	EPI_ISL_17950995	A/domestic_cat/Poland/H249/2023	National Veterinary Research Institut Poland, PIWet-PIB	National Veterinary Research Institut Poland, PIWet-PIB	Edyta,≈öwiƒôto≈Ñ; Katarzyna,Doma≈Ñska-Blicharz; Aleksandra,Giza; Marta,Pietruk; Karolina,Tarasiuk; Krzysztof,Wyrostek; Natalia, Sty≈õ-Fijo≈Ç
EPI2603673	NA	United States	2023-Mar-30	EPI_ISL_17821770	A/cat/Nebraska/23-010184-001/2023	Nebraska Veterinary Diagnostic Center	National Veterinary Services Laboratories - USDA	Chinh,Thanh;Franzen,Kerrie;Love,Emily;Ozella,Mikaela;Killian,Mary;Lantz,Kristina;Stuber,Tod;Hicks,Jessica;Norris,Cameron
EPI2917770	NA	Finland	2023-Oct-17	EPI_ISL_18771245	A/white mink/Finland/UH-361-E1/2023	University of Helsinki, Department of Virology	Finnish Institute for Health and Welfare, THL	Altan, E; Avelin, V; Lindh, E; Savolainen-Kopra, C; Sironen, T; √ñsterlund, P.
EPI2917761	NA	Finland	2023-Oct-17	EPI_ISL_18771244	A/white mink/Finland/UH-357-E1/2023	University of Helsinki, Department of Virology	Finnish Institute for Health and Welfare, THL	Altan, E; Avelin, V; Lindh, E; Savolainen-Kopra, C; Sironen, T; √ñsterlund, P.
EPI2917735	NA	Finland	2023-Oct-17	EPI_ISL_18771178	A/white mink/Finland/UH-353-E1/2023	University of Helsinki, Department of Virology	Finnish Institute for Health and Welfare, THL	Altan, E; Avelin, V; Lindh, E; Savolainen-Kopra, C; Sironen, T; √ñsterlund, P.
EPI2907892	NA	Finland	2023-Sep-20	EPI_ISL_18755130	A/mink/Finland/3082/2023	Finnish Food Authority	Finnish Food Authority	Kauppinen, Ari; Kareinen, Lauri; Tammiranta, Niina; Kantala, Tuija; Fusaro, Alice; Gadd, Tuija
EPI2907884	NA	Finland	2023-Sep-20	EPI_ISL_18755129	A/mink/Finland/3080/2023	Finnish Food Authority	Finnish Food Authority	Kauppinen, Ari; Kareinen, Lauri; Tammiranta, Niina; Kantala, Tuija; Fusaro, Alice; Gadd, Tuija
EPI2755658	NA	Finland	2023-Aug-07	EPI_ISL_18290480	A/mink/Finland/735/2023	Finnish Food Authority	Finnish Food Authority	Kauppinen, Ari; Kareinen, Lauri; Tammiranta, Niina; Kantala, Tuija; Fusaro, Alice; Gadd, Tuija
EPI2755650	NA	Finland	2023-Aug-07	EPI_ISL_18290479	A/mink/Finland/731/2023	Finnish Food Authority	Finnish Food Authority	Kauppinen, Ari; Kareinen, Lauri; Tammiranta, Niina; Kantala, Tuija; Fusaro, Alice; Gadd, Tuija
EPI2755566	NA	Finland	2023-Jul-03	EPI_ISL_18290468	A/mink/Finland/1003/2023	Finnish Food Authority	Finnish Food Authority	Kauppinen, Ari; Kareinen, Lauri; Tammiranta, Niina; Kantala, Tuija; Fusaro, Alice; Gadd, Tuija
EPI2755772	NA	Finland	2023-Jul-03	EPI_ISL_18290467	A/mink/Finland/1002/2023	Finnish Food Authority	Finnish Food Authority	Kauppinen, Ari; Kareinen, Lauri; Tammiranta, Niina; Kantala, Tuija; Fusaro, Alice; Gadd, Tuija
EPI2641542	NA	Finland	2023-Jul-03	EPI_ISL_18011231	A/mink/Finland/1002_23VIR6803-8/2023	Finnish Food Authority	Istituto Zooprofilattico Sperimentale Delle Venezie	Kantala, T.;Kauppinen, A.;Kareinen, L.;Gadd, T.;Galiano, M.;Ikonen, N.;Lindh, E.;Ormelli, S.;Varotto, M.;Zecchin, B.;Pastori, A.;Fusaro, A.;Zamperin, G.;Monne, I.;Terregino, C
EPI1965228	NA	Netherlands	2022-Jan-17	EPI_ISL_9111104	A/otter/Netherlands/22001014-005/2022	Wageningen Bioveterinary Research	Wageningen Bioveterinary Research	Beerens, Nancy; Harders, Frank; Pritz-Verschuren, Sylvia; Roose, Marit; Venema, Sandra; Germeraad, Evelien; Engelsma, Marc; Heutink, Rene
EPI3261177	NA	United States	2024-Mar-20	EPI_ISL_19094660	A/domestic cat/Oklahoma/24_009118-002/2024	United States Department of Agriculture, Agricultural Research Service, National Animal Disease Center	United States Department of Agriculture, Agricultural Research Service, National Animal Disease Center	Nguyen,T., Hutter,C., Markin,A., Thomas,M., Lantz,K., Killian,M.L., Janzen,G.M., Vijendran,S., Wagle,S., Inderski,B., Magstadt,D.R., Li,G., Diel,D.G., Frye,E.A., Dimitrov,K.M., Swinford,A.K., Thompson,A.C., Snevik,K.R., Suarez,D.L., Spackman,E., Lakin,S.M., C,S., Johnson,K.R., Baker,A.L., Robbe-Austerman,S., Torchetti,M.K.; Anderson,T.K.
EPI3255564	NA	United States	2024-Mar-20	EPI_ISL_19088568	A/feline/Texas/24-029329-02/2024	Iowa State University, Veterinary Microbiology and Preventive Medicine Faculty	Iowa State University, Veterinary Microbiology and Preventive Medicine Faculty	Burrough,E.R., Magstadt,D.R., Petersen,B., Timmermans,S.J., Gauger,P.C., Zhang,J., Siepker,C., Mainenti,M., Li,G., Thompson,A.C., Gorden,P.J., Plummer,P.J.; Main,R.
EPI3255563	NA	United States	2024-Mar-20	EPI_ISL_19088567	A/feline/Texas/24-029329-01/2024	Iowa State University, Veterinary Microbiology and Preventive Medicine Faculty	Iowa State University, Veterinary Microbiology and Preventive Medicine Faculty	Burrough,E.R., Magstadt,D.R., Petersen,B., Timmermans,S.J., Gauger,P.C., Zhang,J., Siepker,C., Mainenti,M., Li,G., Thompson,A.C., Gorden,P.J., Plummer,P.J.; Main,R.
EPI3208234	NA	United States	2023-Jan-01	EPI_ISL_19054399	A/feline/USA/23-037332-001/2023	National Veterinary Services Laboratories - USDA	National Veterinary Services Laboratories - USDA	Aufderhar,Matthew;Franzen,Kerrie;Love,Emily;Killian,Mary;Lantz,Kristina;Stuber,Tod;Hicks,Jessica;Norris,Cameron
EPI3208226	NA	United States	2024-Mar-16	EPI_ISL_19054398	A/feline/USA/24-009311-006/2024	National Veterinary Services Laboratories - USDA	National Veterinary Services Laboratories - USDA	Aufderhar,Matthew;Franzen,Kerrie;Love,Emily;Killian,Mary;Lantz,Kristina;Stuber,Tod;Hicks,Jessica;Norris,Cameron
EPI3208218	NA	United States	2024-Mar-16	EPI_ISL_19054397	A/feline/Texas/24-009311-004/2024	National Veterinary Services Laboratories - USDA	National Veterinary Services Laboratories - USDA	Aufderhar,Matthew;Franzen,Kerrie;Love,Emily;Killian,Mary;Lantz,Kristina;Stuber,Tod;Hicks,Jessica;Norris,Cameron
EPI3208210	NA	United States	2024-Mar-20	EPI_ISL_19054396	A/feline/New Mexico/24-009116-005/2024	National Veterinary Services Laboratories - USDA	National Veterinary Services Laboratories - USDA	Aufderhar,Matthew;Franzen,Kerrie;Love,Emily;Killian,Mary;Lantz,Kristina;Stuber,Tod;Hicks,Jessica;Norris,Cameron
EPI3208202	NA	United States	2024-Mar-20	EPI_ISL_19054395	A/feline/New Mexico/24-009116-004/2024	National Veterinary Services Laboratories - USDA	National Veterinary Services Laboratories - USDA	Aufderhar,Matthew;Franzen,Kerrie;Love,Emily;Killian,Mary;Lantz,Kristina;Stuber,Tod;Hicks,Jessica;Norris,Cameron
EPI3208194	NA	United States	2024-Mar-20	EPI_ISL_19054394	A/feline/New Mexico/24-009116-002/2024	National Veterinary Services Laboratories - USDA	National Veterinary Services Laboratories - USDA	Aufderhar,Matthew;Franzen,Kerrie;Love,Emily;Killian,Mary;Lantz,Kristina;Stuber,Tod;Hicks,Jessica;Norris,Cameron
EPI3208186	NA	United States	2024-Mar-20	EPI_ISL_19054393	A/feline/Texas/24-008850-002/2024	National Veterinary Services Laboratories - USDA	National Veterinary Services Laboratories - USDA	Aufderhar,Matthew;Franzen,Kerrie;Love,Emily;Killian,Mary;Lantz,Kristina;Stuber,Tod;Hicks,Jessica;Norris,Cameron
EPI3208178	NA	United States	2024-Mar-20	EPI_ISL_19054392	A/feline/Texas/24-008850-001/2024	National Veterinary Services Laboratories - USDA	National Veterinary Services Laboratories - USDA	Aufderhar,Matthew;Franzen,Kerrie;Love,Emily;Killian,Mary;Lantz,Kristina;Stuber,Tod;Hicks,Jessica;Norris,Cameron
EPI3208170	NA	United States	2024-Mar-22	EPI_ISL_19054391	A/feline/Texas/24-008764-002/2024	National Veterinary Services Laboratories - USDA	National Veterinary Services Laboratories - USDA	Aufderhar,Matthew;Franzen,Kerrie;Love,Emily;Killian,Mary;Lantz,Kristina;Stuber,Tod;Hicks,Jessica;Norris,Cameron
EPI3208162	NA	United States	2024-Mar-22	EPI_ISL_19054390	A/feline/Texas/24-008764-001/2024	National Veterinary Services Laboratories - USDA	National Veterinary Services Laboratories - USDA	Aufderhar,Matthew;Franzen,Kerrie;Love,Emily;Killian,Mary;Lantz,Kristina;Stuber,Tod;Hicks,Jessica;Norris,Cameron
EPI3261249	NA	United States	2024-Mar-08	EPI_ISL_19094669	A/goat/Minnesota/24_007234-035/2024	United States Department of Agriculture, Agricultural Research Service, National Animal Disease Center	United States Department of Agriculture, Agricultural Research Service, National Animal Disease Center	Nguyen,T., Hutter,C., Markin,A., Thomas,M., Lantz,K., Killian,M.L., Janzen,G.M., Vijendran,S., Wagle,S., Inderski,B., Magstadt,D.R., Li,G., Diel,D.G., Frye,E.A., Dimitrov,K.M., Swinford,A.K., Thompson,A.C., Snevik,K.R., Suarez,D.L., Spackman,E., Lakin,S.M., C,S., Johnson,K.R., Baker,A.L., Robbe-Austerman,S., Torchetti,M.K.; Anderson,T.K.
EPI3261241	NA	United States	2024-Mar-08	EPI_ISL_19094668	A/goat/Minnesota/24_007234-034/2024	United States Department of Agriculture, Agricultural Research Service, National Animal Disease Center	United States Department of Agriculture, Agricultural Research Service, National Animal Disease Center	Nguyen,T., Hutter,C., Markin,A., Thomas,M., Lantz,K., Killian,M.L., Janzen,G.M., Vijendran,S., Wagle,S., Inderski,B., Magstadt,D.R., Li,G., Diel,D.G., Frye,E.A., Dimitrov,K.M., Swinford,A.K., Thompson,A.C., Snevik,K.R., Suarez,D.L., Spackman,E., Lakin,S.M., C,S., Johnson,K.R., Baker,A.L., Robbe-Austerman,S., Torchetti,M.K.; Anderson,T.K.
EPI3261233	NA	United States	2024-Mar-08	EPI_ISL_19094667	A/goat/Minnesota/24_007234-032/2024	United States Department of Agriculture, Agricultural Research Service, National Animal Disease Center	United States Department of Agriculture, Agricultural Research Service, National Animal Disease Center	Nguyen,T., Hutter,C., Markin,A., Thomas,M., Lantz,K., Killian,M.L., Janzen,G.M., Vijendran,S., Wagle,S., Inderski,B., Magstadt,D.R., Li,G., Diel,D.G., Frye,E.A., Dimitrov,K.M., Swinford,A.K., Thompson,A.C., Snevik,K.R., Suarez,D.L., Spackman,E., Lakin,S.M., C,S., Johnson,K.R., Baker,A.L., Robbe-Austerman,S., Torchetti,M.K.; Anderson,T.K.
EPI3261225	NA	United States	2024-Mar-08	EPI_ISL_19094666	A/goat/Minnesota/24_007234-030/2024	United States Department of Agriculture, Agricultural Research Service, National Animal Disease Center	United States Department of Agriculture, Agricultural Research Service, National Animal Disease Center	Nguyen,T., Hutter,C., Markin,A., Thomas,M., Lantz,K., Killian,M.L., Janzen,G.M., Vijendran,S., Wagle,S., Inderski,B., Magstadt,D.R., Li,G., Diel,D.G., Frye,E.A., Dimitrov,K.M., Swinford,A.K., Thompson,A.C., Snevik,K.R., Suarez,D.L., Spackman,E., Lakin,S.M., C,S., Johnson,K.R., Baker,A.L., Robbe-Austerman,S., Torchetti,M.K.; Anderson,T.K.
EPI3261217	NA	United States	2024-Mar-08	EPI_ISL_19094665	A/goat/Minnesota/24_007234-029/2024	United States Department of Agriculture, Agricultural Research Service, National Animal Disease Center	United States Department of Agriculture, Agricultural Research Service, National Animal Disease Center	Nguyen,T., Hutter,C., Markin,A., Thomas,M., Lantz,K., Killian,M.L., Janzen,G.M., Vijendran,S., Wagle,S., Inderski,B., Magstadt,D.R., Li,G., Diel,D.G., Frye,E.A., Dimitrov,K.M., Swinford,A.K., Thompson,A.C., Snevik,K.R., Suarez,D.L., Spackman,E., Lakin,S.M., C,S., Johnson,K.R., Baker,A.L., Robbe-Austerman,S., Torchetti,M.K.; Anderson,T.K.
EPI3261089	NA	United States	2024-Mar-08	EPI_ISL_19094649	A/goat/Minnesota/24_007234-036/2024	United States Department of Agriculture, Agricultural Research Service, National Animal Disease Center	United States Department of Agriculture, Agricultural Research Service, National Animal Disease Center	Nguyen,T., Hutter,C., Markin,A., Thomas,M., Lantz,K., Killian,M.L., Janzen,G.M., Vijendran,S., Wagle,S., Inderski,B., Magstadt,D.R., Li,G., Diel,D.G., Frye,E.A., Dimitrov,K.M., Swinford,A.K., Thompson,A.C., Snevik,K.R., Suarez,D.L., Spackman,E., Lakin,S.M., C,S., Johnson,K.R., Baker,A.L., Robbe-Austerman,S., Torchetti,M.K.; Anderson,T.K.
EPI3261081	NA	United States	2024-Mar-08	EPI_ISL_19094648	A/goat/Minnesota/24_007234-037/2024	United States Department of Agriculture, Agricultural Research Service, National Animal Disease Center	United States Department of Agriculture, Agricultural Research Service, National Animal Disease Center	Nguyen,T., Hutter,C., Markin,A., Thomas,M., Lantz,K., Killian,M.L., Janzen,G.M., Vijendran,S., Wagle,S., Inderski,B., Magstadt,D.R., Li,G., Diel,D.G., Frye,E.A., Dimitrov,K.M., Swinford,A.K., Thompson,A.C., Snevik,K.R., Suarez,D.L., Spackman,E., Lakin,S.M., C,S., Johnson,K.R., Baker,A.L., Robbe-Austerman,S., Torchetti,M.K.; Anderson,T.K.
EPI3261073	NA	United States	2024-Mar-08	EPI_ISL_19094647	A/goat/Minnesota/24_007234-044/2024	United States Department of Agriculture, Agricultural Research Service, National Animal Disease Center	United States Department of Agriculture, Agricultural Research Service, National Animal Disease Center	Nguyen,T., Hutter,C., Markin,A., Thomas,M., Lantz,K., Killian,M.L., Janzen,G.M., Vijendran,S., Wagle,S., Inderski,B., Magstadt,D.R., Li,G., Diel,D.G., Frye,E.A., Dimitrov,K.M., Swinford,A.K., Thompson,A.C., Snevik,K.R., Suarez,D.L., Spackman,E., Lakin,S.M., C,S., Johnson,K.R., Baker,A.L., Robbe-Austerman,S., Torchetti,M.K.; Anderson,T.K.
EPI3261065	NA	United States	2024-Mar-08	EPI_ISL_19094646	A/goat/Minnesota/24_007234-047/2024	United States Department of Agriculture, Agricultural Research Service, National Animal Disease Center	United States Department of Agriculture, Agricultural Research Service, National Animal Disease Center	Nguyen,T., Hutter,C., Markin,A., Thomas,M., Lantz,K., Killian,M.L., Janzen,G.M., Vijendran,S., Wagle,S., Inderski,B., Magstadt,D.R., Li,G., Diel,D.G., Frye,E.A., Dimitrov,K.M., Swinford,A.K., Thompson,A.C., Snevik,K.R., Suarez,D.L., Spackman,E., Lakin,S.M., C,S., Johnson,K.R., Baker,A.L., Robbe-Austerman,S., Torchetti,M.K.; Anderson,T.K.
EPI3260993	NA	United States	2024-Feb-23	EPI_ISL_19094637	A/skunk/Washington/24_005959-006/2024	United States Department of Agriculture, Agricultural Research Service, National Animal Disease Center	United States Department of Agriculture, Agricultural Research Service, National Animal Disease Center	Nguyen,T., Hutter,C., Markin,A., Thomas,M., Lantz,K., Killian,M.L., Janzen,G.M., Vijendran,S., Wagle,S., Inderski,B., Magstadt,D.R., Li,G., Diel,D.G., Frye,E.A., Dimitrov,K.M., Swinford,A.K., Thompson,A.C., Snevik,K.R., Suarez,D.L., Spackman,E., Lakin,S.M., C,S., Johnson,K.R., Baker,A.L., Robbe-Austerman,S., Torchetti,M.K.; Anderson,T.K.
EPI3260985	NA	United States	2024-Feb-23	EPI_ISL_19094636	A/skunk/Washington/24_005959-005/2024	United States Department of Agriculture, Agricultural Research Service, National Animal Disease Center	United States Department of Agriculture, Agricultural Research Service, National Animal Disease Center	Nguyen,T., Hutter,C., Markin,A., Thomas,M., Lantz,K., Killian,M.L., Janzen,G.M., Vijendran,S., Wagle,S., Inderski,B., Magstadt,D.R., Li,G., Diel,D.G., Frye,E.A., Dimitrov,K.M., Swinford,A.K., Thompson,A.C., Snevik,K.R., Suarez,D.L., Spackman,E., Lakin,S.M., C,S., Johnson,K.R., Baker,A.L., Robbe-Austerman,S., Torchetti,M.K.; Anderson,T.K.
EPI3260977	NA	United States	2024-Feb-23	EPI_ISL_19094635	A/skunk/Washington/24_005959-004/2024	United States Department of Agriculture, Agricultural Research Service, National Animal Disease Center	United States Department of Agriculture, Agricultural Research Service, National Animal Disease Center	Nguyen,T., Hutter,C., Markin,A., Thomas,M., Lantz,K., Killian,M.L., Janzen,G.M., Vijendran,S., Wagle,S., Inderski,B., Magstadt,D.R., Li,G., Diel,D.G., Frye,E.A., Dimitrov,K.M., Swinford,A.K., Thompson,A.C., Snevik,K.R., Suarez,D.L., Spackman,E., Lakin,S.M., C,S., Johnson,K.R., Baker,A.L., Robbe-Austerman,S., Torchetti,M.K.; Anderson,T.K.
EPI3260969	NA	United States	2024-Mar-23	EPI_ISL_19094634	A/raccoon/New Mexico/24_009496-002/2024	United States Department of Agriculture, Agricultural Research Service, National Animal Disease Center	United States Department of Agriculture, Agricultural Research Service, National Animal Disease Center	Nguyen,T., Hutter,C., Markin,A., Thomas,M., Lantz,K., Killian,M.L., Janzen,G.M., Vijendran,S., Wagle,S., Inderski,B., Magstadt,D.R., Li,G., Diel,D.G., Frye,E.A., Dimitrov,K.M., Swinford,A.K., Thompson,A.C., Snevik,K.R., Suarez,D.L., Spackman,E., Lakin,S.M., C,S., Johnson,K.R., Baker,A.L., Robbe-Austerman,S., Torchetti,M.K.; Anderson,T.K.
EPI3260937	NA	United States	2024-Mar-08	EPI_ISL_19094630	A/goat/Minnesota/24_007234-050/2024	United States Department of Agriculture, Agricultural Research Service, National Animal Disease Center	United States Department of Agriculture, Agricultural Research Service, National Animal Disease Center	Nguyen,T., Hutter,C., Markin,A., Thomas,M., Lantz,K., Killian,M.L., Janzen,G.M., Vijendran,S., Wagle,S., Inderski,B., Magstadt,D.R., Li,G., Diel,D.G., Frye,E.A., Dimitrov,K.M., Swinford,A.K., Thompson,A.C., Snevik,K.R., Suarez,D.L., Spackman,E., Lakin,S.M., C,S., Johnson,K.R., Baker,A.L., Robbe-Austerman,S., Torchetti,M.K.; Anderson,T.K.
EPI3260929	NA	United States	2024-Mar-08	EPI_ISL_19094629	A/goat/Minnesota/24_007234-048/2024	United States Department of Agriculture, Agricultural Research Service, National Animal Disease Center	United States Department of Agriculture, Agricultural Research Service, National Animal Disease Center	Nguyen,T., Hutter,C., Markin,A., Thomas,M., Lantz,K., Killian,M.L., Janzen,G.M., Vijendran,S., Wagle,S., Inderski,B., Magstadt,D.R., Li,G., Diel,D.G., Frye,E.A., Dimitrov,K.M., Swinford,A.K., Thompson,A.C., Snevik,K.R., Suarez,D.L., Spackman,E., Lakin,S.M., C,S., Johnson,K.R., Baker,A.L., Robbe-Austerman,S., Torchetti,M.K.; Anderson,T.K.
EPI3244337	NA	United States	2024-Feb-26	EPI_ISL_19083124	A/Mountain Lion/Montana/01/2024	Montana Public Health Laboratory	National Institute of Allergy and Infectious Diseases NIAID/NIH	Williamson, Brandi; Anzick, Sarah; Yinda, C. Kwe; Beare, Paul; Kanakabandi, Kishore; Martens, Craig; de Wit, Emmie; Munster, Vincent
EPI3229798	NA	Uruguay	2023-Sep-06	EPI_ISL_19070498	A/pinniped/Uruguay/P4_6923/2023	Universidad de la Rep√∫blica, Facultad de Ciencias, Genetica Evolutiva/Divisi√≥n de Laboratorios Veterinarios, Plataforma Genomica		Tomas,G., Marandino,A., Panzera,Y., Rodriguez,S., Wallau,G.L., Dezordi,F.Z., Perez,R., Bassetti,L., Negro,R., Williman,J., Uriarte,V., Grazioli,F., Leizagoyen,C., Riveron,S., Coronel,J., Bello,S., Paez,E., Lima,M., Mendez,V.; Perez,R.
EPI3229725	NA	Uruguay	2023-Sep-14	EPI_ISL_19070486	A/pinniped/Uruguay/P18_14923/2023	Universidad de la Rep√∫blica, Facultad de Ciencias, Genetica Evolutiva/Divisi√≥n de Laboratorios Veterinarios, Plataforma Genomica		Tomas,G., Marandino,A., Panzera,Y., Rodriguez,S., Wallau,G.L., Dezordi,F.Z., Perez,R., Bassetti,L., Negro,R., Williman,J., Uriarte,V., Grazioli,F., Leizagoyen,C., Riveron,S., Coronel,J., Bello,S., Paez,E., Lima,M., Mendez,V.; Perez,R.
EPI3229717	NA	Uruguay	2023-Sep-14	EPI_ISL_19070485	A/pinniped/Uruguay/P17_14923/2023	Universidad de la Rep√∫blica, Facultad de Ciencias, Genetica Evolutiva/Divisi√≥n de Laboratorios Veterinarios, Plataforma Genomica		Tomas,G., Marandino,A., Panzera,Y., Rodriguez,S., Wallau,G.L., Dezordi,F.Z., Perez,R., Bassetti,L., Negro,R., Williman,J., Uriarte,V., Grazioli,F., Leizagoyen,C., Riveron,S., Coronel,J., Bello,S., Paez,E., Lima,M., Mendez,V.; Perez,R.
EPI3229703	NA	Uruguay	2023-Sep-11	EPI_ISL_19070483	A/pinniped/Uruguay/P14_11923/2023	Universidad de la Rep√∫blica, Facultad de Ciencias, Genetica Evolutiva/Divisi√≥n de Laboratorios Veterinarios, Plataforma Genomica		Tomas,G., Marandino,A., Panzera,Y., Rodriguez,S., Wallau,G.L., Dezordi,F.Z., Perez,R., Bassetti,L., Negro,R., Williman,J., Uriarte,V., Grazioli,F., Leizagoyen,C., Riveron,S., Coronel,J., Bello,S., Paez,E., Lima,M., Mendez,V.; Perez,R.
EPI3229695	NA	Uruguay	2023-Sep-11	EPI_ISL_19070482	A/pinniped/Uruguay/P13_11923/2023	Universidad de la Rep√∫blica, Facultad de Ciencias, Genetica Evolutiva/Divisi√≥n de Laboratorios Veterinarios, Plataforma Genomica		Tomas,G., Marandino,A., Panzera,Y., Rodriguez,S., Wallau,G.L., Dezordi,F.Z., Perez,R., Bassetti,L., Negro,R., Williman,J., Uriarte,V., Grazioli,F., Leizagoyen,C., Riveron,S., Coronel,J., Bello,S., Paez,E., Lima,M., Mendez,V.; Perez,R.
EPI3229687	NA	Uruguay	2023-Sep-08	EPI_ISL_19070481	A/pinniped/Uruguay/P10_8923/2023	Universidad de la Rep√∫blica, Facultad de Ciencias, Genetica Evolutiva/Divisi√≥n de Laboratorios Veterinarios, Plataforma Genomica		Tomas,G., Marandino,A., Panzera,Y., Rodriguez,S., Wallau,G.L., Dezordi,F.Z., Perez,R., Bassetti,L., Negro,R., Williman,J., Uriarte,V., Grazioli,F., Leizagoyen,C., Riveron,S., Coronel,J., Bello,S., Paez,E., Lima,M., Mendez,V.; Perez,R.
EPI3162332	NA	United States	2024-Mar-08	EPI_ISL_19015125	A/goat/Minnesota/24-007234-009/2024	National Veterinary Services Laboratories - USDA	National Veterinary Services Laboratories - USDA	Aufderhar,Matthew;Franzen,Kerrie;Love,Emily;Killian,Mary;Lantz,Kristina;Stuber,Tod;Hicks,Jessica;Norris,Cameron
EPI3162324	NA	United States	2024-Mar-08	EPI_ISL_19015124	A/goat/Minnesota/24-007234-006/2024	National Veterinary Services Laboratories - USDA	National Veterinary Services Laboratories - USDA	Aufderhar,Matthew;Franzen,Kerrie;Love,Emily;Killian,Mary;Lantz,Kristina;Stuber,Tod;Hicks,Jessica;Norris,Cameron
EPI3162316	NA	United States	2024-Mar-08	EPI_ISL_19015123	A/goat/Minnesota/24-007234-003/2024	National Veterinary Services Laboratories - USDA	National Veterinary Services Laboratories - USDA	Aufderhar,Matthew;Franzen,Kerrie;Love,Emily;Killian,Mary;Lantz,Kristina;Stuber,Tod;Hicks,Jessica;Norris,Cameron
EPI3110586	NA	United States	2023-Oct-01	EPI_ISL_18976667	A/polar bear/Alaska/23-038123/2023	United States Department of Agriculture, National Veterinary Services Laboratories-Diagnostic Virology Laboratory	National Veterinary Services Laboratories - USDA	Franzen,Kerrie;Love,Emily;Ozella,Mikaela;Killian,Mary;Lantz,Kristina;Stuber,Tod;Hicks,Jessica;Norris,Cameron
EPI3084239	NA	Argentina	2023-Aug-26	EPI_ISL_18945320	A/South American fur seal/Argentina/RN-PB019/2023	Instituto Nacional de Tecnologia Agropecuaria, Instituto de Virologia e Innovaciones Tecnologicas		Rimondi,A., Vanstreels,R.E.T., Olivera,V.S., Donini,A., Miqueo Lauriente,M.; Uhart,M.
EPI2759138	NA	United States	2023-Aug-29	EPI_ISL_18311028	A/harbor seal/Washington/23-026504-002/2023	National Veterinary Services Laboratories - USDA	National Veterinary Services Laboratories - USDA	Chinh,Thanh;Franzen,Kerrie;Love,Emily;Ozella,Mikaela;Killian,Mary;Lantz,Kristina;Stuber,Tod;Hicks,Jessica;Norris,Cameron
EPI2759130	NA	United States	2023-Aug-29	EPI_ISL_18311027	A/harbor seal/Washington/23-026504-001/2023	National Veterinary Services Laboratories - USDA	National Veterinary Services Laboratories - USDA	Chinh,Thanh;Franzen,Kerrie;Love,Emily;Ozella,Mikaela;Killian,Mary;Lantz,Kristina;Stuber,Tod;Hicks,Jessica;Norris,Cameron
EPI2759114	NA	United States	2023-Aug-25	EPI_ISL_18311025	A/harbor seal/Washington/23-025991-001/2023	National Veterinary Services Laboratories - USDA	National Veterinary Services Laboratories - USDA	Chinh,Thanh;Franzen,Kerrie;Love,Emily;Ozella,Mikaela;Killian,Mary;Lantz,Kristina;Stuber,Tod;Hicks,Jessica;Norris,Cameron
EPI2759106	NA	United States	2023-Aug-19	EPI_ISL_18311024	A/harbor seal/Washington/23-025744-002/2023	National Veterinary Services Laboratories - USDA	National Veterinary Services Laboratories - USDA	Chinh,Thanh;Franzen,Kerrie;Love,Emily;Ozella,Mikaela;Killian,Mary;Lantz,Kristina;Stuber,Tod;Hicks,Jessica;Norris,Cameron
EPI2759098	NA	United States	2023-Aug-19	EPI_ISL_18311023	A/harbor seal/Washington/23-025744-001/2023	National Veterinary Services Laboratories - USDA	National Veterinary Services Laboratories - USDA	Chinh,Thanh;Franzen,Kerrie;Love,Emily;Ozella,Mikaela;Killian,Mary;Lantz,Kristina;Stuber,Tod;Hicks,Jessica;Norris,Cameron
EPI2745244	NA	Peru	2022-Nov-22	EPI_ISL_18265431	A/dolphin/Peru/PIU-SER002/2022	Servicio Nacional Forestal y de Fauna Silvestre (SERFOR)	Pontificia Universidad Catolica del Peru	Leguia,M.; Garcia-Glaessner,A.; Munoz-Saavedra,B.; Juarez,D.; Barrera,P.; Jara,J.; Silva,W.; Ploog,K.; Colchao-Claux,P.; Lescano,J.
EPI2664221	NA	Peru	2022-Nov-22	EPI_ISL_18054503	A/dolphin/Peru/PIU-002/2022			Leguia,M., Garcia-Glaessner,A., Munoz-Saavedra,B., Juarez,D., Barrera,P., Jara,J., Silva,W., Ploog,K., Colchao-Claux,P.; Lescano,J.
EPI2437554	NA	Canada	2022-May-18	EPI_ISL_17073215	A/striped_skunk/BC/AIVPHL-118/2022	B.C. Centre for Disease Control	British Columbia Centre for Disease Control	Himsworth, Chelsea; Prystajecky,Natalie; Tyson,John; Jassem,Agatha; Kuchinski,Kevin; Coombe, Michelle; Lee,Tracy; Azana,Rob; Fung,Janet; Chan,Michael; Cheung,Branco; Caleta,Jessica; Tsang,Frankie; Russell,Shannon; Zlosnik,James; Hoang,Linda
EPI2437038	NA	Belgium	2023-Feb-09	EPI_ISL_17072114	A/Mustela_putorius/Belgium/01421_0001/2023	Sciensano - Animal Infectious Diseases	Sciensano, Department of Animal Infectious Diseases	Van Borm, Steven; Roupie, Virginie; Hostyn, Pierre; Mathijs, Elisabeth; Lambrecht, Benedicte; Steensels, Mieke
EPI2263649	NA	United States	2022-Nov-15	EPI_ISL_16297122	A/skunk/Wisconsin/22-037029-001/2022	National Veterinary Services Laboratories - USDA	National Veterinary Services Laboratories - USDA	Chinh,Thanh;Love, Emily;Franzen,Kerrie;Killian,Mary;Koster,Leo;Lantz,Kristina;Stuber,Tod;Hicks,Jessica
EPI2263441	NA	United States	2022-Oct-21	EPI_ISL_16297066	A/skunk/Minnesota/22-034925-001/2022	National Veterinary Services Laboratories - USDA	National Veterinary Services Laboratories - USDA	Chinh,Thanh;Love, Emily;Franzen,Kerrie;Killian,Mary;Koster,Leo;Lantz,Kristina;Stuber,Tod;Hicks,Jessica
EPI2236754	NA	Canada	2022-Apr-26	EPI_ISL_16023453	A/Skunk/AB/FAV-0416-03/2022	Alberta Agriculture and Forestry, Government of Alberta	Canadian Food Inspection Agency	Alkie, Tamiru; Hicks, Mark; Pybuse, Margo J; Xu, Wanhong; Hisanaga, Tamiko; Suderman, Suderman; Koziuk, Janice; Kruczkiewicz, Peter; Nguyen, Hoang Hai; Fisher, Mathew; Lung, Oliver; Berhane, Yohannes
EPI2236762	NA	Canada	2022-Apr-22	EPI_ISL_16023452	A/Skunk/AB/FAV-0416-02/2022	Alberta Agriculture and Forestry, Government of Alberta	Canadian Food Inspection Agency	Alkie, Tamiru; Hicks, Mark; Pybuse, Margo J; Xu, Wanhong; Hisanaga, Tamiko; Suderman, Suderman; Koziuk, Janice; Kruczkiewicz, Peter; Nguyen, Hoang Hai; Fisher, Mathew; Lung, Oliver; Berhane, Yohannes
EPI2236746	NA	Canada	2022-Apr-22	EPI_ISL_16023451	A/Skunk/AB/FAV-0416-01/2022	Alberta Agriculture and Forestry, Government of Alberta	Canadian Food Inspection Agency	Alkie, Tamiru; Hicks, Mark; Pybuse, Margo J; Xu, Wanhong; Hisanaga, Tamiko; Suderman, Suderman; Koziuk, Janice; Kruczkiewicz, Peter; Nguyen, Hoang Hai; Fisher, Mathew; Lung, Oliver; Berhane, Yohannes
EPI2236738	NA	Canada	2022-May-31	EPI_ISL_16023450	A/Skunk/AB/FAV-0835-10/2022	Alberta Agriculture and Forestry, Government of Alberta	Canadian Food Inspection Agency	Alkie, Tamiru; Hicks, Mark; Pybuse, Margo J; Xu, Wanhong; Hisanaga, Tamiko; Suderman, Suderman; Koziuk, Janice; Kruczkiewicz, Peter; Nguyen, Hoang Hai; Fisher, Mathew; Lung, Oliver; Berhane, Yohannes
EPI2236730	NA	Canada	2022-May-04	EPI_ISL_16023449	A/Skunk/AB/FAV-0835-07/2022	Alberta Agriculture and Forestry, Government of Alberta	Canadian Food Inspection Agency	Alkie, Tamiru; Hicks, Mark; Pybuse, Margo J; Xu, Wanhong; Hisanaga, Tamiko; Suderman, Suderman; Koziuk, Janice; Kruczkiewicz, Peter; Nguyen, Hoang Hai; Fisher, Mathew; Lung, Oliver; Berhane, Yohannes
EPI2236722	NA	Canada	2022-May-04	EPI_ISL_16023377	A/Skunk/AB/FAV-0835-05/2022	Alberta Agriculture and Forestry, Government of Alberta	Canadian Food Inspection Agency	Alkie, Tamiru; Hicks, Mark; Pybuse, Margo J; Xu, Wanhong; Hisanaga, Tamiko; Suderman, Suderman; Koziuk, Janice; Kruczkiewicz, Peter; Nguyen, Hoang Hai; Fisher, Mathew; Lung, Oliver; Berhane, Yohannes
EPI2236714	NA	Canada	2022-May-31	EPI_ISL_16023376	A/Skunk/AB/FAV-0835-11/2022	Alberta Agriculture and Forestry, Government of Alberta	Canadian Food Inspection Agency	Alkie, Tamiru; Hicks, Mark; Pybuse, Margo J; Xu, Wanhong; Hisanaga, Tamiko; Suderman, Suderman; Koziuk, Janice; Kruczkiewicz, Peter; Nguyen, Hoang Hai; Fisher, Mathew; Lung, Oliver; Berhane, Yohannes
EPI2236706	NA	Canada	2022-Jul-19	EPI_ISL_16023375	A/Skunk/AB/FAV-0897-03/2022	Alberta Agriculture and Forestry, Government of Alberta	Canadian Food Inspection Agency	Alkie, Tamiru; Hicks, Mark; Pybuse, Margo J; Xu, Wanhong; Hisanaga, Tamiko; Suderman, Suderman; Koziuk, Janice; Kruczkiewicz, Peter; Nguyen, Hoang Hai; Fisher, Mathew; Lung, Oliver; Berhane, Yohannes
EPI2236698	NA	Canada	2022-Jul-19	EPI_ISL_16023374	A/Skunk/AB/FAV-0897-02/2022	Alberta Agriculture and Forestry, Government of Alberta	Canadian Food Inspection Agency	Alkie, Tamiru; Hicks, Mark; Pybuse, Margo J; Xu, Wanhong; Hisanaga, Tamiko; Suderman, Suderman; Koziuk, Janice; Kruczkiewicz, Peter; Nguyen, Hoang Hai; Fisher, Mathew; Lung, Oliver; Berhane, Yohannes
EPI2236690	NA	Canada	2022-Jun-28	EPI_ISL_16023372	A/Skunk/AB/FAV-0897-01/2022	Alberta Agriculture and Forestry, Government of Alberta	Canadian Food Inspection Agency	Alkie, Tamiru; Hicks, Mark; Pybuse, Margo J; Xu, Wanhong; Hisanaga, Tamiko; Suderman, Suderman; Koziuk, Janice; Kruczkiewicz, Peter; Nguyen, Hoang Hai; Fisher, Mathew; Lung, Oliver; Berhane, Yohannes
EPI2150626	NA	Sweden	2022-Jun-29	EPI_ISL_14810369	A/porpoise /Sweden/SVA220712SZ0367/FB002184/O-2022	Swedish Veterinary Agency (SVA)	Swedish Veterinary Agency (SVA)
EPI1958456	NA	Netherlands	2022-Jan-08	EPI_ISL_8799320	A/polecat/Netherlands/22000516-003/2022	Wageningen Bioveterinary Research	Wageningen Bioveterinary Research	Beerens, Nancy; Harders, Frank; Pritz-Verschuren, Sylvia; Roose, Marit; Venema, Sandra; Germeraad, Evelien; Engelsma, Marc; Heutink, Rene
EPI2296211	NA	Belgium	2022-Dec-08	EPI_ISL_16547666	A/Mustela_furo/Belgium/14312-0002/2022	Sciensano - Animal Infectious Diseases	Sciensano, Department of Animal Infectious Diseases	Van Borm, Steven; Roupie, Virginie; Hostyn, Pierre; Lambrecht, Benedicte; Steensels, Mieke
EPI2296199	NA	Belgium	2022-Dec-08	EPI_ISL_16547552	A/Mustela_furo/Belgium/14312-0001/2022	Sciensano - Animal Infectious Diseases	Sciensano, Department of Animal Infectious Diseases	Van Borm, Steven; Roupie, Virginie; Hostyn, Pierre; Lambrecht, Benedicte; Steensels, Mieke
EPI1995131	NA	Slovenia	2022-Jan-05	EPI_ISL_11007536	A/ferret/Slovenia/308MZ_22VIR777-9/2022	Beijing Genomics Institute (BGI)	Istituto Zooprofilattico Sperimentale delle Venezie	Slavec, B.; Ra?nik, J.; Krape?, U.; ?labravec, Z.; A?ko, J.; Cociancich, V.; Paller, T.; Vidrih, ?.; Rojs, O.Z.; Arseniev, S.; Groza, O.; Barbierato, G.; Zecchin, B.; Fusaro, A.; Schivo, A.; Salviato, A.; Palumbo, E.; Giussani, E.; Monne, I.; Terregino, C.
EPI2611368	NA	Poland	2023-Jun-21	EPI_ISL_17956379	A/domestic_cat/Poland/H255-M/2023	National Veterinary Research Institut Poland, PIWet-PIB	National Veterinary Research Institut Poland, PIWet-PIB	Edyta,≈öwiƒôto≈Ñ; Katarzyna,Doma≈Ñska-Blicharz; Aleksandra,Giza; Marta,Pietruk; Karolina,Tarasiuk; Krzysztof,Wyrostek; Natalia, Sty≈õ-Fijo≈Ç
EPI2611363	NA	Poland	2023-Jun-21	EPI_ISL_17956378	A/domestic_cat/Poland/H246-M/2023	National Veterinary Research Institut Poland, PIWet-PIB	National Veterinary Research Institut Poland, PIWet-PIB	Edyta,≈öwiƒôto≈Ñ; Katarzyna,Doma≈Ñska-Blicharz; Aleksandra,Giza; Marta,Pietruk; Karolina,Tarasiuk; Krzysztof,Wyrostek; Natalia, Sty≈õ-Fijo≈Ç
EPI2610692	NA	Poland	2023-Jun-21	EPI_ISL_17949824	A/cat/Poland/Gda1/2023	University of Gdansk	University of Gdansk	Maciej,Grzybek; Tomasz,Lepionka; Krzysztof,Pyrc; Lukasz,Rabalski
EPI2837133	NP	Finland	2023-Sep-20	EPI_ISL_18618768	A/mink/Finland/3079/2023	Finnish Food Authority	Finnish Food Authority	Kauppinen, Ari; Kareinen, Lauri; Tammiranta, Niina; Kantala, Tuija; Fusaro, Alice; Gadd, Tuija
EPI2837125	NP	Finland	2023-Sep-20	EPI_ISL_18618767	A/mink/Finland/3078/2023	Finnish Food Authority	Finnish Food Authority	Kauppinen, Ari; Kareinen, Lauri; Tammiranta, Niina; Kantala, Tuija; Fusaro, Alice; Gadd, Tuija
EPI2837115	NP	Finland	2023-Sep-20	EPI_ISL_18618766	A/mink/Finland/3081/2023	Finnish Food Authority	Finnish Food Authority	Kauppinen, Ari; Kareinen, Lauri; Tammiranta, Niina; Kantala, Tuija; Fusaro, Alice; Gadd, Tuija
EPI2837105	NP	Finland	2023-Sep-20	EPI_ISL_18618701	A/mink/Finland/3076/2023	Finnish Food Authority	Finnish Food Authority	Kauppinen, Ari; Kareinen, Lauri; Tammiranta, Niina; Kantala, Tuija; Fusaro, Alice; Gadd, Tuija
EPI2837081	NP	Finland	2023-Aug-05	EPI_ISL_18618377	A/mink/Finland/688/2023	Finnish Food Authority	Finnish Food Authority	Kauppinen, Ari; Kareinen, Lauri; Tammiranta, Niina; Kantala, Tuija; Fusaro, Alice; Gadd, Tuija
EPI2760287	NP	Finland	2023-Jul-17	EPI_ISL_18321746	A/raccoon_dog/Finland/552_23VIR6928-5/2023	Finnish Food Authority	Istituto Zooprofilattico Sperimentale Delle Venezie	Gadd, T.; Tammiranta, N; Kantala, K.; Nokireki, T.; Pastori, A.; Zecchin, B.; Fusaro, A.; Schivo, A.; Salviato, A.; Palumbo, E.; Giussani, E.; Monne, I.; Terregino, C.
EPI2755515	NP	Finland	2023-Aug-05	EPI_ISL_18292966	A/mink/Finland/710/2023	Finnish Food Authority	Finnish Food Authority	Kauppinen, Ari; Kareinen, Lauri; Tammiranta, Niina; Kantala, Tuija; Fusaro, Alice; Giussani, Edoardo; Gadd, Tuija
EPI2755507	NP	Finland	2023-Aug-05	EPI_ISL_18292965	A/mink/Finland/709/2023	Finnish Food Authority	Finnish Food Authority	Kauppinen, Ari; Kareinen, Lauri; Tammiranta, Niina; Kantala, Tuija; Fusaro, Alice; Giussani, Edoardo; Gadd, Tuija
EPI2755414	NP	Finland	2023-Jul-03	EPI_ISL_18292952	A/mink/Finland/506/2023	Finnish Food Authority	Finnish Food Authority	Kauppinen, Ari; Kareinen, Lauri; Tammiranta, Niina; Kantala, Tuija; Fusaro, Alice; Galiano, Monica; Ikonen, Niina; Lindh, Erika; Gadd, Tuija
EPI2536808	NP	Netherlands	2022-Jan-16	EPI_ISL_17580930	A/Stone Marten/Netherlands/1/2022	Erasmus Medical Center	Erasmus Medical Center	Vuong,O;Thewessen, S;Bellido-Martin,A.B; Chestakova, I; Sikkema, R;Fouchier, R.A.M.
EPI2513416	NP	Canada	2022-Dec-26	EPI_ISL_17494319	A/American crow/PEI/FAV-0019-01/2022	Atlantic Veterinary College, University of Prince Edward Island	Canadian Food Inspection Agency	Parma, L; Hisanaga, T; Xu, W; Alkie, T; Fisher, M; Lung, O; Yason, C; Jones, M; Berhane, Y
EPI2197217	NP	Finland	2022-Feb-01	EPI_ISL_15518269	A/lynx/Finland/Vi209-22_22VIR3127-2/2022	Finnish Food Authority	Istituto Zooprofilattico Sperimentale Delle Venezie	Tammiranta, N.;Kantala, T.;Laamanen, I.;Gadd, T.;Zecchin, B.;Fusaro, A.;Schivo, A.;Salviato, A.;Palumbo, E.;Milani, A.;Giussani, E.;Pastori, A.;Monne, I.;Terregino, C.
EPI1987251	NP	Netherlands	2022-Feb-13	EPI_ISL_10220432	A/badger/Netherlands/22003078-004/2022	Wageningen Bioveterinary Research	Wageningen Bioveterinary Research	Beerens, Nancy; Harders, Frank; Pritz-Verschuren, Sylvia; Roose, Marit; Venema, Sandra; Germeraad, Evelien; Engelsma, Marc; Heutink, Rene
EPI1987227	NP	Netherlands	2022-Feb-09	EPI_ISL_10220429	A/polecat/Netherlands/22002792-005/2022	Wageningen Bioveterinary Research	Wageningen Bioveterinary Research	Beerens, Nancy; Harders, Frank; Pritz-Verschuren, Sylvia; Roose, Marit; Venema, Sandra; Germeraad, Evelien; Engelsma, Marc; Heutink, Rene
EPI1980997	NP	Netherlands	2022-Jan-24	EPI_ISL_9616266	A/polecat/Netherlands/22002047-001/2022	Wageningen Bioveterinary Research	Wageningen Bioveterinary Research	Beerens, Nancy; Harders, Frank; Pritz-Verschuren, Sylvia; Roose, Marit; Venema, Sandra; Germeraad, Evelien; Engelsma, Marc; Heutink, Rene
EPI2780161	NP	Korea, Republic of	2023-Jul-04	EPI_ISL_18102701	A/feline/South Korea/SNU-02/2023			K,Lee; M,Yeom; T,Vu; Q,Do; W,NA; M,Lee; D,Jeong; D,Cheon; D,Song
EPI2780154	NP	Korea, Republic of	2023-Jul-04	EPI_ISL_18102700	A/feline/South Korea/SNU-01/2023			K,Lee; M,Yeom; T,Vu; Q,Do; W,NA; M,Lee; D,Jeong; D,Cheon; D,Song
EPI2652223	NP	Poland	2023-Jun-17	EPI_ISL_18033408	A/caracal/Poland/H303-P/2023	National Veterinary Research Institut Poland, PIWet-PIB	National Veterinary Research Institut Poland, PIWet-PIB	Swieton,Edyta;Tarasiuk,Karolina;Wyrostek,Krzysztof;Stys-Fijol,Natalia;Domanska-Blicharz,Katarzyna
EPI2597245	NP	Peru	2023-Feb-08	EPI_ISL_17805999	A/lion/Peru/AIS0554/2023			Cruz,C.D., Conza,L.B., Espejo,V., Troncos,G., Perez,D.R., Marcelo,O.L., Schilling,M.; Tinoco,Y.
EPI3260246	NP	United States	2024-Jan-30	EPI_ISL_19094507	A/mountain lion/Montana/24_005908-001/2024	United States Department of Agriculture, Agricultural Research Service, National Animal Disease Center	United States Department of Agriculture, Agricultural Research Service, National Animal Disease Center	T.,Nguyen; C.,Hutter; A.,Markin; M.,Thomas; K.,Lantz; M.L.,Killian; G.M.,Janzen; S.,Vijendran; S.,Wagle; B.,Inderski; D.R.,Magstadt; G.,Li; D.G.,Diel; E.A.,Frye; K.M.,Dimitrov; A.K.,Swinford; A.C.,Thompson; K.R.,Snevik; D.L.,Suarez; E.,Spackman; S.M.,Lakin; S.,C; K.R.,Johnson; A.L.,Baker; Robbe-S.,Austerman; M.K.,Torchetti; Anderson,T.K.
EPI3260238	NP	United States	2024-Apr-01	EPI_ISL_19094506	A/mountain lion/Montana/24_010315-001/2024	United States Department of Agriculture, Agricultural Research Service, National Animal Disease Center	United States Department of Agriculture, Agricultural Research Service, National Animal Disease Center	T.,Nguyen; C.,Hutter; A.,Markin; M.,Thomas; K.,Lantz; M.L.,Killian; G.M.,Janzen; S.,Vijendran; S.,Wagle; B.,Inderski; D.R.,Magstadt; G.,Li; D.G.,Diel; E.A.,Frye; K.M.,Dimitrov; A.K.,Swinford; A.C.,Thompson; K.R.,Snevik; D.L.,Suarez; E.,Spackman; S.M.,Lakin; S.,C; K.R.,Johnson; A.L.,Baker; Robbe-S.,Austerman; M.K.,Torchetti; Anderson,T.K.
EPI3260221	NP	United States	2024-Mar-11	EPI_ISL_19094504	A/skunk/Montana/24_007939-001/2024	United States Department of Agriculture, Agricultural Research Service, National Animal Disease Center	United States Department of Agriculture, Agricultural Research Service, National Animal Disease Center	T.,Nguyen; C.,Hutter; A.,Markin; M.,Thomas; K.,Lantz; M.L.,Killian; G.M.,Janzen; S.,Vijendran; S.,Wagle; B.,Inderski; D.R.,Magstadt; G.,Li; D.G.,Diel; E.A.,Frye; K.M.,Dimitrov; A.K.,Swinford; A.C.,Thompson; K.R.,Snevik; D.L.,Suarez; E.,Spackman; S.M.,Lakin; S.,C; K.R.,Johnson; A.L.,Baker; Robbe-S.,Austerman; M.K.,Torchetti; Anderson,T.K.
EPI3260197	NP	United States	2024-Feb-23	EPI_ISL_19094501	A/skunk/Washington/24_005959-001/2024	United States Department of Agriculture, Agricultural Research Service, National Animal Disease Center	United States Department of Agriculture, Agricultural Research Service, National Animal Disease Center	T.,Nguyen; C.,Hutter; A.,Markin; M.,Thomas; K.,Lantz; M.L.,Killian; G.M.,Janzen; S.,Vijendran; S.,Wagle; B.,Inderski; D.R.,Magstadt; G.,Li; D.G.,Diel; E.A.,Frye; K.M.,Dimitrov; A.K.,Swinford; A.C.,Thompson; K.R.,Snevik; D.L.,Suarez; E.,Spackman; S.M.,Lakin; S.,C; K.R.,Johnson; A.L.,Baker; Robbe-S.,Austerman; M.K.,Torchetti; Anderson,T.K.
EPI3260189	NP	United States	2024-Feb-23	EPI_ISL_19094500	A/skunk/Washington/24_005959-002/2024	United States Department of Agriculture, Agricultural Research Service, National Animal Disease Center	United States Department of Agriculture, Agricultural Research Service, National Animal Disease Center	T.,Nguyen; C.,Hutter; A.,Markin; M.,Thomas; K.,Lantz; M.L.,Killian; G.M.,Janzen; S.,Vijendran; S.,Wagle; B.,Inderski; D.R.,Magstadt; G.,Li; D.G.,Diel; E.A.,Frye; K.M.,Dimitrov; A.K.,Swinford; A.C.,Thompson; K.R.,Snevik; D.L.,Suarez; E.,Spackman; S.M.,Lakin; S.,C; K.R.,Johnson; A.L.,Baker; Robbe-S.,Austerman; M.K.,Torchetti; Anderson,T.K.
EPI3260181	NP	United States	2024-Feb-23	EPI_ISL_19094499	A/skunk/Washington/24_005959-003/2024	United States Department of Agriculture, Agricultural Research Service, National Animal Disease Center	United States Department of Agriculture, Agricultural Research Service, National Animal Disease Center	T.,Nguyen; C.,Hutter; A.,Markin; M.,Thomas; K.,Lantz; M.L.,Killian; G.M.,Janzen; S.,Vijendran; S.,Wagle; B.,Inderski; D.R.,Magstadt; G.,Li; D.G.,Diel; E.A.,Frye; K.M.,Dimitrov; A.K.,Swinford; A.C.,Thompson; K.R.,Snevik; D.L.,Suarez; E.,Spackman; S.M.,Lakin; S.,C; K.R.,Johnson; A.L.,Baker; Robbe-S.,Austerman; M.K.,Torchetti; Anderson,T.K.
EPI3259733	NP	United States	2024-Mar-19	EPI_ISL_19094443	A/feline/Montana/24-009038-001/2024	National Veterinary Services Laboratories - USDA	National Veterinary Services Laboratories - USDA	Aufderhar,Matthew;Franzen,Kerrie;Killian,Mary;Lantz,Kristina;Stuber,Tod;Hicks,Jessica;Norris,Cameron
EPI3158789	NP	United States	2024-Feb-23	EPI_ISL_19014400	A/skunk/New Mexico/24-006483-001/2024	National Veterinary Services Laboratories - USDA	National Veterinary Services Laboratories - USDA	Aufderhar,Matthew;Franzen,Kerrie;Love,Emily;Killian,Mary;Lantz,Kristina;Stuber,Tod;Hicks,Jessica;Norris,Cameron
EPI2906702	NP	France	2022-Nov-01	EPI_ISL_18750109	A/tibetan blue bear/France/CHUT-0007R2/2022	Centre Hospitalier Universitaire de Toulouse	Centre Hospitalier Universitaire de Toulouse	Bessiere,P., Gaide,N., Crispo,M., Dirat,M., Croville,G., Le Loc'h,G.; Guerin,J.-L.
EPI2895488	NP	United States	2023-Aug-19	EPI_ISL_18737559	A/harbor seal/Washington/23-025744-002/2023	National Veterinary Services Laboratories - USDA	National Veterinary Services Laboratories - USDA	Franzen,Kerrie;Love,Emily;Ozella,Mikaela;Killian,Mary;Lantz,Kristina;Stuber,Tod;Hicks,Jessica;Norris,Cameron
EPI2895480	NP	United States	2023-Aug-19	EPI_ISL_18737558	A/harbor seal/Washington/23-025744-001/2023	National Veterinary Services Laboratories - USDA	National Veterinary Services Laboratories - USDA	Franzen,Kerrie;Love,Emily;Ozella,Mikaela;Killian,Mary;Lantz,Kristina;Stuber,Tod;Hicks,Jessica;Norris,Cameron
EPI2895016	NP	United States	2023-Aug-13	EPI_ISL_18731638	A/harbor seal/Washington/23-027069-002/2023	National Veterinary Services Laboratories - USDA	National Veterinary Services Laboratories - USDA	Franzen,Kerrie;Love,Emily;Ozella,Mikaela;Killian,Mary;Lantz,Kristina;Stuber,Tod;Hicks,Jessica;Norris,Cameron
EPI2894992	NP	United States	2023-Aug-25	EPI_ISL_18731622	A/harbor seal/Washington/23-025991-001/2023	National Veterinary Services Laboratories - USDA	National Veterinary Services Laboratories - USDA	Franzen,Kerrie;Love,Emily;Ozella,Mikaela;Killian,Mary;Lantz,Kristina;Stuber,Tod;Hicks,Jessica;Norris,Cameron
EPI2894984	NP	United States	2023-Aug-29	EPI_ISL_18731621	A/harbor seal/Washington/23-026504-002/2023	National Veterinary Services Laboratories - USDA	National Veterinary Services Laboratories - USDA	Franzen,Kerrie;Love,Emily;Ozella,Mikaela;Killian,Mary;Lantz,Kristina;Stuber,Tod;Hicks,Jessica;Norris,Cameron
EPI2894976	NP	United States	2023-Aug-29	EPI_ISL_18731620	A/harbor seal/Washington/23-026504-001/2023	National Veterinary Services Laboratories - USDA	National Veterinary Services Laboratories - USDA	Franzen,Kerrie;Love,Emily;Ozella,Mikaela;Killian,Mary;Lantz,Kristina;Stuber,Tod;Hicks,Jessica;Norris,Cameron
EPI2856649	NP	Canada	2023-Apr-20	EPI_ISL_18665592	A/Striped_Skunk/BC/AIVPHL-1083/2023	B.C. Centre for Disease Control	Public Health Agency of Canada	Himsworth, Chelsea; Prystajecky,Natalie; Tyson,John; Jassem,Agatha; Kuchinski,Kevin; Coombe, Michelle; Lee,Tracy; Azana,Rob; Fung,Janet; Chan,Michael; Cheung,Branco; Caleta,Jessica; Tsang,Frankie; Yang,Kevin; Russell,Shannon; Zlosnik,James; Hoang,Linda
EPI2856626	NP	Canada	2023-Apr-20	EPI_ISL_18665588	A/Striped_Skunk/BC/AIVPHL-1082/2023	B.C. Centre for Disease Control	Public Health Agency of Canada	Himsworth, Chelsea; Prystajecky,Natalie; Tyson,John; Jassem,Agatha; Kuchinski,Kevin; Coombe, Michelle; Lee,Tracy; Azana,Rob; Fung,Janet; Chan,Michael; Cheung,Branco; Caleta,Jessica; Tsang,Frankie; Yang,Kevin; Russell,Shannon; Zlosnik,James; Hoang,Linda
EPI2856603	NP	Canada	2023-Apr-20	EPI_ISL_18665585	A/Striped_Skunk/BC/AIVPHL-1080/2023	B.C. Centre for Disease Control	Public Health Agency of Canada	Himsworth, Chelsea; Prystajecky,Natalie; Tyson,John; Jassem,Agatha; Kuchinski,Kevin; Coombe, Michelle; Lee,Tracy; Azana,Rob; Fung,Janet; Chan,Michael; Cheung,Branco; Caleta,Jessica; Tsang,Frankie; Yang,Kevin; Russell,Shannon; Zlosnik,James; Hoang,Linda
EPI2856229	NP	Canada	2023-Mar-09	EPI_ISL_18665535	A/Striped_Skunk/BC/AIVPHL-977/2023	B.C. Centre for Disease Control	Public Health Agency of Canada	Himsworth, Chelsea; Prystajecky,Natalie; Tyson,John; Jassem,Agatha; Kuchinski,Kevin; Coombe, Michelle; Lee,Tracy; Azana,Rob; Fung,Janet; Chan,Michael; Cheung,Branco; Caleta,Jessica; Tsang,Frankie; Yang,Kevin; Russell,Shannon; Zlosnik,James; Hoang,Linda
EPI2856205	NP	Canada	2023-Mar-09	EPI_ISL_18665532	A/Striped_Skunk/BC/AIVPHL-976/2023	B.C. Centre for Disease Control	Public Health Agency of Canada	Himsworth, Chelsea; Prystajecky,Natalie; Tyson,John; Jassem,Agatha; Kuchinski,Kevin; Coombe, Michelle; Lee,Tracy; Azana,Rob; Fung,Janet; Chan,Michael; Cheung,Branco; Caleta,Jessica; Tsang,Frankie; Yang,Kevin; Russell,Shannon; Zlosnik,James; Hoang,Linda
EPI2856182	NP	Canada	2023-Mar-06	EPI_ISL_18665529	A/Striped_Skunk/BC/AIVPHL-975/2023	B.C. Centre for Disease Control	Public Health Agency of Canada	Himsworth, Chelsea; Prystajecky,Natalie; Tyson,John; Jassem,Agatha; Kuchinski,Kevin; Coombe, Michelle; Lee,Tracy; Azana,Rob; Fung,Janet; Chan,Michael; Cheung,Branco; Caleta,Jessica; Tsang,Frankie; Yang,Kevin; Russell,Shannon; Zlosnik,James; Hoang,Linda
EPI2816121	NP	Denmark	2023-Apr-29	EPI_ISL_18594303	A_red_fox_Denmark_08303-1.01_2023-04-29	Statens Serumm Institute	Statens Serum Institute	Hjulsager,C;Liang,Y
EPI2512587	NP	Canada	2022-Jun-14	EPI_ISL_17478645	A/Black Bear/QC/FAV-0902/2022	Laboratoire de sant√© animale Minist√®re de l'Agriculture, des P√™cheries et de l'A	Canadian Food Inspection Agency	Koziuk, J; Hisanaga, T; Xu, W; Alkie, T; Lung, O; Fisher, M; Nadeau, M.S; Lair, S; Berhane, Y
EPI2512519	NP	Canada	2022-Jun-24	EPI_ISL_17478584	A/Black Bear/QC/FAV-0935/2022	Laboratoire de sant√© animale Minist√®re de l'Agriculture, des P√™cheries et de l'A	Canadian Food Inspection Agency	Koziuk, J; Hisanaga, T; Xu, W; Alkie, T; Lung, O; Fisher, M; Nadeau, M.S; Lair, S; Berhane, Y
EPI2509900	NP	United Kingdom	2022-Jun-19	EPI_ISL_17465835	A/harbour_seal/Scotland/054948/2022	Animal and Plant Health Agency (APHA)	Animal and Plant Health Agency (APHA)
EPI2509892	NP	United Kingdom	2023-Feb-20	EPI_ISL_17465834	A/common_dolphin/England/040499/2023	Animal and Plant Health Agency (APHA)	Animal and Plant Health Agency (APHA)
EPI2509884	NP	United Kingdom	2023-Feb-20	EPI_ISL_17465833	A/common_dolphin/Wales/040498/2023	Animal and Plant Health Agency (APHA)	Animal and Plant Health Agency (APHA)
EPI2509876	NP	United Kingdom	2023-Feb-06	EPI_ISL_17465832	A/harbour_porpoise/England/040497/2023	Animal and Plant Health Agency (APHA)	Animal and Plant Health Agency (APHA)
EPI2507005	NP	United States	2023-Jan-27	EPI_ISL_17424646	A/striped skunk/Kansas/W23-094/2023	St. Jude Center of Excellence for Influenza Research and Response - CEIRR Influenza Data Processing and Communication Center	St. Jude Center of Excellence for Influenza Research and Response - CEIRR Influenza Data Processing and Communication Center	Poulson,R., Stallknecht,D., Rubrum,A., Jeevan,T., Walker,D. and Webby,R.
EPI2506854	NP	United States	2022-Jul-07	EPI_ISL_17424627	A/harbor seal/Maine/MME-185-ns/2022			Fauquier,D.; Doughty,L.A.; Rubrum,A.; Jeevan,T.; Walker,D.; Webby,R.
EPI2506846	NP	United States	2022-Jun-24	EPI_ISL_17424626	A/harbor seal/Maine/MME-117-ns/2022			Fauquier,D.; Doughty,L.A.; Rubrum,A.; Jeevan,T.; Walker,D.; Webby,R.
EPI2506838	NP	United States	2022-Jul-02	EPI_ISL_17424625	A/harbor seal/Maine/MME-150-L/2022			Fauquier,D.; Doughty,L.A.; Rubrum,A.; Jeevan,T.; Walker,D.; Webby,R.
EPI2506830	NP	United States	2022-Jul-07	EPI_ISL_17424624	A/harbor seal/Maine/MME-185-L/2022	St. Jude Center of Excellence for Influenza Research and Response - CEIRR Influenza Data Processing and Communication Center	St. Jude Center of Excellence for Influenza Research and Response - CEIRR Influenza Data Processing and Communication Center	Fauquier,D., Doughty,L.A., Rubrum,A., Jeevan,T., Walker,D. and Webby,R.
EPI2506822	NP	United States	2022-Jul-02	EPI_ISL_17424623	A/harbor seal/Maine/MME-150-ns/2022			Fauquier,D.; Doughty,L.A.; Rubrum,A.; Jeevan,T.; Walker,D.; Webby,R.
EPI2506815	NP	United States	2022-Jul-02	EPI_ISL_17424622	A/harbor seal/Maine/MME-147-L/2022	St. Jude Center of Excellence for Influenza Research and Response - CEIRR Influenza Data Processing and Communication Center	St. Jude Center of Excellence for Influenza Research and Response - CEIRR Influenza Data Processing and Communication Center	Fauquier,D., Doughty,L.A., Rubrum,A., Jeevan,T., Walker,D. and Webby,R.
EPI2473777	NP	United States	2022-Jul-22	EPI_ISL_17260689	A/skunk/Idaho/22-023547-001/2022	National Veterinary Services Laboratories - USDA	National Veterinary Services Laboratories - USDA	Chinh,Thanh;Franzen,Kerrie;Love,Emily;Killian,Mary;Koster,Leo;Lantz,Kristina;Stuber,Tod;Hicks,Jessica;Norris,Cameron
EPI2473769	NP	United States	2022-Jul-06	EPI_ISL_17260688	A/raccoon/Michigan/22-021733-010/2022	National Veterinary Services Laboratories - USDA	National Veterinary Services Laboratories - USDA	Chinh,Thanh;Franzen,Kerrie;Love,Emily;Killian,Mary;Koster,Leo;Lantz,Kristina;Stuber,Tod;Hicks,Jessica;Norris,Cameron
EPI2473691	NP	United States	2022-Apr-14	EPI_ISL_17260683	A/fisher/Wisconsin/22-019946-001/2022	National Veterinary Services Laboratories - USDA	National Veterinary Services Laboratories - USDA	Chinh,Thanh;Franzen,Kerrie;Love,Emily;Killian,Mary;Koster,Leo;Lantz,Kristina;Stuber,Tod;Hicks,Jessica;Norris,Cameron
EPI2473677	NP	United States	2022-Jun-07	EPI_ISL_17260682	A/skunk/Washington/22-019274-004/2022	National Veterinary Services Laboratories - USDA	National Veterinary Services Laboratories - USDA	Chinh,Thanh;Franzen,Kerrie;Love,Emily;Killian,Mary;Koster,Leo;Lantz,Kristina;Stuber,Tod;Hicks,Jessica;Norris,Cameron
EPI2473649	NP	United States	2022-Jun-06	EPI_ISL_17260680	A/skunk/Idaho/22-018976-004/2022	National Veterinary Services Laboratories - USDA	National Veterinary Services Laboratories - USDA	Chinh,Thanh;Franzen,Kerrie;Love,Emily;Killian,Mary;Koster,Leo;Lantz,Kristina;Stuber,Tod;Hicks,Jessica;Norris,Cameron
EPI2473579	NP	United States	2022-May-03	EPI_ISL_17260675	A/coyote/Michigan/22-017507-005/2022	National Veterinary Services Laboratories - USDA	National Veterinary Services Laboratories - USDA	Chinh,Thanh;Franzen,Kerrie;Love,Emily;Killian,Mary;Koster,Leo;Lantz,Kristina;Stuber,Tod;Hicks,Jessica;Norris,Cameron
EPI2473523	NP	United States	2022-May-25	EPI_ISL_17260671	A/Virginia opossum/Iowa/22-016780-003/2022	National Veterinary Services Laboratories - USDA	National Veterinary Services Laboratories - USDA	Chinh,Thanh;Franzen,Kerrie;Love,Emily;Killian,Mary;Koster,Leo;Lantz,Kristina;Stuber,Tod;Hicks,Jessica;Norris,Cameron
EPI2469499	NP	Belgium	2023-Mar-02	EPI_ISL_17246921	A/Mustela_putorius/Belgium/01922_0001/2023	Sciensano - Animal Infectious Diseases	Sciensano, Department of Animal Infectious Diseases	Van Borm, Steven; Roupie, Virginie; Hostyn, Pierre; Mathijs, Elisabeth; Lambrecht, Benedicte; Steensels, Mieke
EPI2274967	NP	Canada	2022-May-30	EPI_ISL_16367971	A/Striped Skunk/SK/FAV-0824-01/2022	Western College of Veterinary Medicine, University of Saskatchewan	Canadian Food Inspection Agency
EPI2260727	NP	United States	2022-Jan-01	EPI_ISL_16271848	A/black bear/Alaska/22-036396-001/2022	National Veterinary Services Laboratories - USDA	National Veterinary Services Laboratories - USDA	Chinh,Thanh;Love, Emily;Franzen,Kerrie;Killian,Mary;Koster,Leo;Lantz,Kristina;Stuber,Tod;Hicks,Jessica
EPI2260623	NP	United States	2022-Nov-04	EPI_ISL_16271835	A/striped skunk/Idaho/22-037165-002/2022	National Veterinary Services Laboratories - USDA	National Veterinary Services Laboratories - USDA	Chinh,Thanh;Love, Emily;Franzen,Kerrie;Killian,Mary;Koster,Leo;Lantz,Kristina;Stuber,Tod;Hicks,Jessica
EPI2257437	NP	United States	2022-Mar-30	EPI_ISL_16212269	A/bottlenose dolphin/Florida/UFTt2203/2022			Murawski,A.; Allison,A.; Ossiboff,R.; Fabrizio,T.; Jeevan,T.; Mukherjee,N.; Killian,M.L.; Torchetti,M.; Walsh,M.; Webby,R.
EPI2235585	NP	Canada	2022-May-18	EPI_ISL_16003268	A/Skunk/MB/FAV-470/2022	Manitoba Agriculture	Canadian Food Inspection Agency	Alkie, Tamiru; Cox, Sherri; Pople, Neil; Xu, Wanhong; Hisanaga, Tamiko; Suderman, Suderman; Koziuk, Janice; Kruczkiewicz, Peter; Nguyen, Hoang Hai; Fisher, Mathew; Lung, Oliver; Berhane, Yohannes
EPI2182136	NP	United States	2022-Mar-30	EPI_ISL_15078255	A/dolphin/Florida/22-025319-002/2022	National Veterinary Services Laboratories - USDA	National Veterinary Services Laboratories - USDA	Chinh,Thanh;Love, Emily;Franzen,Kerrie;Killian,Mary;Koster,Leo;Lantz,Kristina;Stuber,Tod;Hicks,Jessica
EPI2182128	NP	United States	2022-Jun-07	EPI_ISL_15078254	A/skunk/Washington/22-019274-001/2022	National Veterinary Services Laboratories - USDA	National Veterinary Services Laboratories - USDA	Chinh,Thanh;Love, Emily;Franzen,Kerrie;Killian,Mary;Koster,Leo;Lantz,Kristina;Stuber,Tod;Hicks,Jessica
EPI2182112	NP	United States	2022-Jun-08	EPI_ISL_15078252	A/raccoon/Washington/22-018406-002/2022	National Veterinary Services Laboratories - USDA	National Veterinary Services Laboratories - USDA	Chinh,Thanh;Love, Emily;Franzen,Kerrie;Killian,Mary;Koster,Leo;Lantz,Kristina;Stuber,Tod;Hicks,Jessica
EPI2182096	NP	United States	2022-May-25	EPI_ISL_15078250	A/Virginia opossum/Iowa/22-016780-001/2022	National Veterinary Services Laboratories - USDA	National Veterinary Services Laboratories - USDA	Chinh,Thanh;Love, Emily;Franzen,Kerrie;Killian,Mary;Koster,Leo;Lantz,Kristina;Stuber,Tod;Hicks,Jessica
EPI2182080	NP	United States	2022-May-24	EPI_ISL_15078248	A/bobcat/Wisconsin/22-016051-001/2022	National Veterinary Services Laboratories - USDA	National Veterinary Services Laboratories - USDA	Chinh,Thanh;Love, Emily;Franzen,Kerrie;Killian,Mary;Koster,Leo;Lantz,Kristina;Stuber,Tod;Hicks,Jessica
EPI2181753	NP	United States	2022-Mar-30	EPI_ISL_15069397	A/bottlenose dolphin/Florida/UFTt2203/2022	University of Florida, College of Veterinary Medicine	St. Jude Children's Research Hospital	Murawski, Allison; Allison, Andrew; Ossiboff, Robert; Fabrizio, Thomas; Jeevan, Trushar; Killian, Mary Lea; Torchetti, Mia; Walsh, Michael; Webby, Richard
EPI2158641	NP	United Kingdom	2022-Jan-01	EPI_ISL_14864642	A/otter/Scotland/M100366/2022	Animal and Plant Health Agency (APHA)	Animal and Plant Health Agency (APHA)
EPI2158633	NP	United Kingdom	2022-Jan-01	EPI_ISL_14864641	A/otter/Scotland/M100839/2022	Animal and Plant Health Agency (APHA)	Animal and Plant Health Agency (APHA)
EPI2109944	NP	Japan	2022-Apr-01	EPI_ISL_14070455	A/tanuki/Hokkaido/1/2022	Graduate School of Veterinary Medicine, Hokkaido University	Graduate School of Veterinary Medicine, Hokkaido University	Yoshihiro, Sakoda; Takahiro, Hiono; Norikazu, Isoda
EPI2557220	NP	Netherlands	2023-Jan-01	EPI_ISL_17672783	A/grey seal/Netherlands/30448/2023	Tier√§rztliche Hochschule Hannover	Friedrich-Loeffler-Institut
EPI2455332	NP	Germany	2023-Feb-27	EPI_ISL_17167249	A/grey seal/Germany-SH/AI01973/2023	Landeslabor Schleswig-Holstein	Friedrich-Loeffler-Institut
EPI2398404	NP	United Kingdom	2022-Jul-25	EPI_ISL_16904554	A/Harbour_Seal/Scotland/162925/2022	Animal and Plant Health Agency (APHA)	Animal and Plant Health Agency (APHA)
EPI2398396	NP	United Kingdom	2022-Mar-12	EPI_ISL_16904553	A/Harbour_Seal/Scotland/162919/2022	Animal and Plant Health Agency (APHA)	Animal and Plant Health Agency (APHA)
EPI2310437	NP	United States	2022-Jul-15	EPI_ISL_16632542	A/harbor seal/Maine/22-025072-002/2022	Cummings School of Veterinary Medicine at Tufts University	Cummings School of Veterinary Medicine at Tufts University	Chinh,Thanh; Franzen,Kerrie; Love,Emily; Killian,Mary; Lantz,Kristina; Hicks,Jessica; Norris, Cameron; Stuber,Tod; Sawatzki, Kaitlin; Puryear, Wendy; Foss, Alexa; Doughty,Linda; Runstadler, Jonathan
EPI2310429	NP	United States	2022-Jul-09	EPI_ISL_16632541	A/harbor seal/Maine/22-022528-008/2022	Cummings School of Veterinary Medicine at Tufts University	Cummings School of Veterinary Medicine at Tufts University	Chinh,Thanh; Franzen,Kerrie; Love,Emily; Killian,Mary; Lantz,Kristina; Hicks,Jessica; Norris, Cameron; Stuber,Tod; Sawatzki, Kaitlin; Puryear, Wendy; Foss, Alexa; Doughty,Linda; Runstadler, Jonathan
EPI2310421	NP	United States	2022-Jul-09	EPI_ISL_16632540	A/harbor seal/Maine/22-022528-006/2022	Cummings School of Veterinary Medicine at Tufts University	Cummings School of Veterinary Medicine at Tufts University	Chinh,Thanh; Franzen,Kerrie; Love,Emily; Killian,Mary; Lantz,Kristina; Hicks,Jessica; Norris, Cameron; Stuber,Tod; Sawatzki, Kaitlin; Puryear, Wendy; Foss, Alexa; Doughty,Linda; Runstadler, Jonathan
EPI2310413	NP	United States	2022-Jul-08	EPI_ISL_16632539	A/harbor seal/Maine/22-022528-003/2022	Cummings School of Veterinary Medicine at Tufts University	Cummings School of Veterinary Medicine at Tufts University	Chinh,Thanh; Franzen,Kerrie; Love,Emily; Killian,Mary; Lantz,Kristina; Hicks,Jessica; Norris, Cameron; Stuber,Tod; Sawatzki, Kaitlin; Puryear, Wendy; Foss, Alexa; Doughty,Linda; Runstadler, Jonathan
EPI2110518	NP	United States	2022-Jun-29	EPI_ISL_14098924	A/harbor seal/Maine/22-020983-007/2022	National Veterinary Services Laboratories - USDA	National Veterinary Services Laboratories - USDA	Chinh,Thanh;Franzen,Kerrie;Love, Emily;Killian,Mary;Koster,Leo;Lantz,Kristina;Torchetti,Mia;Stuber,Tod;Hicks,Jessica
EPI2110510	NP	United States	2022-Jun-29	EPI_ISL_14098923	A/harbor seal/Maine/22-020983-006/2022	National Veterinary Services Laboratories - USDA	National Veterinary Services Laboratories - USDA	Chinh,Thanh;Franzen,Kerrie;Love, Emily;Killian,Mary;Koster,Leo;Lantz,Kristina;Torchetti,Mia;Stuber,Tod;Hicks,Jessica
EPI2110502	NP	United States	2022-Jun-29	EPI_ISL_14098922	A/grey seal/Maine/22-020983-003/2022	National Veterinary Services Laboratories - USDA	National Veterinary Services Laboratories - USDA	Chinh,Thanh;Franzen,Kerrie;Love, Emily;Killian,Mary;Koster,Leo;Lantz,Kristina;Torchetti,Mia;Stuber,Tod;Hicks,Jessica
EPI2110494	NP	United States	2022-Jun-29	EPI_ISL_14098921	A/harbor seal/Maine/22-020983-002/2022	National Veterinary Services Laboratories - USDA	National Veterinary Services Laboratories - USDA	Chinh,Thanh;Franzen,Kerrie;Love, Emily;Killian,Mary;Koster,Leo;Lantz,Kristina;Torchetti,Mia;Stuber,Tod;Hicks,Jessica
EPI2110486	NP	United States	2022-Jun-29	EPI_ISL_14098920	A/harbor seal/Maine/22-020983-001/2022	National Veterinary Services Laboratories - USDA	National Veterinary Services Laboratories - USDA	Chinh,Thanh;Franzen,Kerrie;Love, Emily;Killian,Mary;Koster,Leo;Lantz,Kristina;Torchetti,Mia;Stuber,Tod;Hicks,Jessica
EPI2110478	NP	United States	2022-Jun-27	EPI_ISL_14098919	A/harbor seal/Maine/22-020455-005/2022	National Veterinary Services Laboratories - USDA	National Veterinary Services Laboratories - USDA	Chinh,Thanh;Franzen,Kerrie;Love, Emily;Killian,Mary;Koster,Leo;Lantz,Kristina;Torchetti,Mia;Stuber,Tod;Hicks,Jessica
EPI2110470	NP	United States	2022-Jun-26	EPI_ISL_14098918	A/harbor seal/Maine/22-020455-004/2022	National Veterinary Services Laboratories - USDA	National Veterinary Services Laboratories - USDA	Chinh,Thanh;Franzen,Kerrie;Love, Emily;Killian,Mary;Koster,Leo;Lantz,Kristina;Torchetti,Mia;Stuber,Tod;Hicks,Jessica
EPI2110462	NP	United States	2022-Jun-22	EPI_ISL_14098917	A/harbor seal/Maine/22-020455-003/2022	National Veterinary Services Laboratories - USDA	National Veterinary Services Laboratories - USDA	Chinh,Thanh;Franzen,Kerrie;Love, Emily;Killian,Mary;Koster,Leo;Lantz,Kristina;Torchetti,Mia;Stuber,Tod;Hicks,Jessica
EPI2110454	NP	United States	2022-Jun-24	EPI_ISL_14098916	A/harbor seal/Maine/22-020455-002/2022	National Veterinary Services Laboratories - USDA	National Veterinary Services Laboratories - USDA	Chinh,Thanh;Franzen,Kerrie;Love, Emily;Killian,Mary;Koster,Leo;Lantz,Kristina;Torchetti,Mia;Stuber,Tod;Hicks,Jessica
EPI2110447	NP	United States	2022-Jun-24	EPI_ISL_14098915	A/harbor seal/Maine/22-020455-001/2022	National Veterinary Services Laboratories - USDA	National Veterinary Services Laboratories - USDA	Chinh,Thanh;Franzen,Kerrie;Love, Emily;Killian,Mary;Koster,Leo;Lantz,Kristina;Torchetti,Mia;Stuber,Tod;Hicks,Jessica
EPI2641355	NP	Finland	2023-Jul-10	EPI_ISL_18011099	A/mink/Finland/512-23/2023	Finnish Food Authority	Finnish Institute for Health and Welfare, THL	Tuija,Kantala; Alice,Fusaro; Tuija,Gadd; Monica,Galiano; Niina,Ikonen; Lauri,Kareinen; Ari,Kauppinen; Erika,Lindh
EPI2291511	NP	Spain	2022-Oct-26	EPI_ISL_16507096	A/mink/Spain/22VIR12774-14_3869-3/2022	Istituto Zooprofilattico Sperimentale delle Venezie, EU/OIE/Reference Laboratory and FAO Reference Centre for AI and ND	Istituto Zooprofilattico Sperimentale Delle Venezie	Ruano,M.J.; Rocha,A.; Sanchez,A.; Aguero,M.; Pastori, A.; Zecchin, B.; Fusaro, A.; Schivo, A.; Salviato, A.; Palumbo, E.; Giussani, E.; Monne, I.; Terregino, C.
EPI2291503	NP	Spain	2022-Oct-26	EPI_ISL_16507095	A/mink/Spain/22VIR12774-13_3869-2/2022	Istituto Zooprofilattico Sperimentale delle Venezie, EU/OIE/Reference Laboratory and FAO Reference Centre for AI and ND	Istituto Zooprofilattico Sperimentale Delle Venezie	Ruano,M.J.; Rocha,A.; Sanchez,A.; Aguero,M.; Pastori, A.; Zecchin, B.; Fusaro, A.; Schivo, A.; Salviato, A.; Palumbo, E.; Giussani, E.; Monne, I.; Terregino, C.
EPI2236193	NP	Canada	2022-May-19	EPI_ISL_16013982	A/Wild Mink/ON/FAV-0529-01/2022	Ontario Veterinary College, University of Guelph	Canadian Food Inspection Agency	Alkie, Tamiru; Cox, Sherri; Ojkic, Davor; Stevens, Brian; Xu, Wanhong; Hisanaga, Tamiko; Suderman, Suderman; Koziuk, Janice; Kruczkiewicz, Peter; Nguyen, Hoang Hai; Fisher, Mathew; Lung, Oliver; Berhane, Yohannes
EPI2220614	NP	Spain	2022-Oct-18	EPI_ISL_15878542	A/Mink/Spain/3691-3_22VIR10586-9/2022	Laboratorio Central de Veterinaria	Istituto Zooprofilattico Sperimentale delle Venezie	Ruano, M.J.; Rocha, A.; Sanchez, A.; Aguero, M; Barbierato, G.; Zecchin, B.; Fusaro, A.; Schivo, A.; Salviato, A.; Palumbo, E.; Giussani, E.; Pastori, A.; Monne, I.; Terregino, C.
EPI2220606	NP	Spain	2022-Oct-18	EPI_ISL_15878541	A/Mink/Spain/3691-2_22VIR10586-8/2022	Laboratorio Central de Veterinaria	Istituto Zooprofilattico Sperimentale delle Venezie	Ruano, M.J.; Rocha, A.; Sanchez, A.; Aguero, M; Barbierato, G.; Zecchin, B.; Fusaro, A.; Schivo, A.; Salviato, A.; Palumbo, E.; Giussani, E.; Pastori, A.; Monne, I.; Terregino, C.
EPI2220598	NP	Spain	2022-Oct-18	EPI_ISL_15878540	A/Mink/Spain/3691-10_22VIR10586-11/2022	Laboratorio Central de Veterinaria	Istituto Zooprofilattico Sperimentale delle Venezie	Ruano, M.J.; Rocha, A.; Sanchez, A.; Aguero, M; Barbierato, G.; Zecchin, B.; Fusaro, A.; Schivo, A.; Salviato, A.; Palumbo, E.; Giussani, E.; Pastori, A.; Monne, I.; Terregino, C.
EPI2220590	NP	Spain	2022-Oct-18	EPI_ISL_15878539	A/Mink/Spain/3691-8_22VIR10586-10/2022	Laboratorio Central de Veterinaria	Istituto Zooprofilattico Sperimentale delle Venezie	Ruano, M.J.; Rocha, A.; Sanchez, A.; Aguero, M; Barbierato, G.; Zecchin, B.; Fusaro, A.; Schivo, A.; Salviato, A.; Palumbo, E.; Giussani, E.; Pastori, A.; Monne, I.; Terregino, C.
EPI2652293	NP	Poland	2023-Jan-01	EPI_ISL_18033418	A/domestic_cat/Poland/H322-M/2023	National Veterinary Research Institut Poland, PIWet-PIB	National Veterinary Research Institut Poland, PIWet-PIB	Swieton,Edyta;Tarasiuk,Karolina;Wyrostek,Krzysztof;Stys-Fijol,Natalia;Domanska-Blicharz,Katarzyna
EPI2652286	NP	Poland	2023-Jan-01	EPI_ISL_18033417	A/domestic_cat/Poland/H321-M/2023	National Veterinary Research Institut Poland, PIWet-PIB	National Veterinary Research Institut Poland, PIWet-PIB	Swieton,Edyta;Tarasiuk,Karolina;Wyrostek,Krzysztof;Stys-Fijol,Natalia;Domanska-Blicharz,Katarzyna
EPI2652279	NP	Poland	2023-Jan-01	EPI_ISL_18033416	A/domestic_cat/Poland/H320-M/2023	National Veterinary Research Institut Poland, PIWet-PIB	National Veterinary Research Institut Poland, PIWet-PIB	Swieton,Edyta;Tarasiuk,Karolina;Wyrostek,Krzysztof;Stys-Fijol,Natalia;Domanska-Blicharz,Katarzyna
EPI2652272	NP	Poland	2023-Jan-01	EPI_ISL_18033415	A/domestic_cat/Poland/H319-M/2023	National Veterinary Research Institut Poland, PIWet-PIB	National Veterinary Research Institut Poland, PIWet-PIB	Swieton,Edyta;Tarasiuk,Karolina;Wyrostek,Krzysztof;Stys-Fijol,Natalia;Domanska-Blicharz,Katarzyna
EPI2652265	NP	Poland	2023-Jul-06	EPI_ISL_18033414	A/domestic_cat/Poland/H314-W3/2023	National Veterinary Research Institut Poland, PIWet-PIB	National Veterinary Research Institut Poland, PIWet-PIB	Swieton,Edyta;Tarasiuk,Karolina;Wyrostek,Krzysztof;Stys-Fijol,Natalia;Domanska-Blicharz,Katarzyna
EPI2652258	NP	Poland	2023-Jan-01	EPI_ISL_18033413	A/domestic_cat/Poland/H304-M2/2023	National Veterinary Research Institut Poland, PIWet-PIB	National Veterinary Research Institut Poland, PIWet-PIB	Swieton,Edyta;Tarasiuk,Karolina;Wyrostek,Krzysztof;Stys-Fijol,Natalia;Domanska-Blicharz,Katarzyna
EPI2652251	NP	Poland	2023-Jan-01	EPI_ISL_18033412	A/domestic_cat/Poland/H304-M1/2023	National Veterinary Research Institut Poland, PIWet-PIB	National Veterinary Research Institut Poland, PIWet-PIB	Swieton,Edyta;Tarasiuk,Karolina;Wyrostek,Krzysztof;Stys-Fijol,Natalia;Domanska-Blicharz,Katarzyna
EPI2652244	NP	Poland	2023-Jan-01	EPI_ISL_18033411	A/domestic_cat/Poland/H299-N/2023	National Veterinary Research Institut Poland, PIWet-PIB	National Veterinary Research Institut Poland, PIWet-PIB	Swieton,Edyta;Tarasiuk,Karolina;Wyrostek,Krzysztof;Stys-Fijol,Natalia;Domanska-Blicharz,Katarzyna
EPI2652237	NP	Poland	2023-Jan-01	EPI_ISL_18033410	A/domestic_cat/Poland/H293-N/2023	National Veterinary Research Institut Poland, PIWet-PIB	National Veterinary Research Institut Poland, PIWet-PIB	Swieton,Edyta;Tarasiuk,Karolina;Wyrostek,Krzysztof;Stys-Fijol,Natalia;Domanska-Blicharz,Katarzyna
EPI2652230	NP	Poland	2023-Jan-01	EPI_ISL_18033409	A/domestic_cat/Poland/H275k3-M/2023	National Veterinary Research Institut Poland, PIWet-PIB	National Veterinary Research Institut Poland, PIWet-PIB	Swieton,Edyta;Tarasiuk,Karolina;Wyrostek,Krzysztof;Stys-Fijol,Natalia;Domanska-Blicharz,Katarzyna
EPI2616223	NP	Poland	2023-Jun-26	EPI_ISL_17971998	A/domestic_cat/Poland/H264-G/2023(H5N1)	National Veterinary Research Institut Poland, PIWet-PIB	National Veterinary Research Institut Poland, PIWet-PIB	Swieton, E.;Domanska-Blicharz, K.;Tarasiuk, K.; Wyrostek, K.;Stys-Fijol, N.
EPI2616215	NP	Poland	2023-Jun-26	EPI_ISL_17971997	A/domestic_cat/Poland/H277-W1/2023(H5N1)	National Veterinary Research Institut Poland, PIWet-PIB	National Veterinary Research Institut Poland, PIWet-PIB	Swieton, E.;Domanska-Blicharz, K.;Tarasiuk, K.; Wyrostek, K.;Stys-Fijol, N.
EPI2616207	NP	Poland	2023-Jun-25	EPI_ISL_17971996	A/domestic_cat/Poland/H271-W/2023(H5N1)	National Veterinary Research Institut Poland, PIWet-PIB	National Veterinary Research Institut Poland, PIWet-PIB	Swieton, E.;Domanska-Blicharz, K.;Tarasiuk, K.; Wyrostek, K.;Stys-Fijol, N.
EPI2616199	NP	Poland	2023-Jun-25	EPI_ISL_17971995	A/domestic_cat/Poland/H270-W/2023(H5N1)	National Veterinary Research Institut Poland, PIWet-PIB	National Veterinary Research Institut Poland, PIWet-PIB	Swieton, E.;Domanska-Blicharz, K.;Tarasiuk, K.; Wyrostek, K.;Stys-Fijol, N.
EPI2616191	NP	Poland	2023-Jun-25	EPI_ISL_17971994	A/domestic_cat/Poland/H267-W/2023(H5N1)	National Veterinary Research Institut Poland, PIWet-PIB	National Veterinary Research Institut Poland, PIWet-PIB	Swieton, E.;Domanska-Blicharz, K.;Tarasiuk, K.; Wyrostek, K.;Stys-Fijol, N.
EPI2616183	NP	Poland	2023-Jun-19	EPI_ISL_17971993	A/domestic_cat/Poland/H266-W/2023(H5N1)	National Veterinary Research Institut Poland, PIWet-PIB	National Veterinary Research Institut Poland, PIWet-PIB	Swieton, E.;Domanska-Blicharz, K.;Tarasiuk, K.; Wyrostek, K.;Stys-Fijol, N.
EPI2616175	NP	Poland	2023-Jun-26	EPI_ISL_17971992	A/domestic_cat/Poland/H263-G/2023(H5N1)	National Veterinary Research Institut Poland, PIWet-PIB	National Veterinary Research Institut Poland, PIWet-PIB	Swieton, E.;Domanska-Blicharz, K.;Tarasiuk, K.; Wyrostek, K.;Stys-Fijol, N.
EPI2616167	NP	Poland	2023-Jun-24	EPI_ISL_17971991	A/domestic_cat/Poland/H257-G/2023(H5N1)	National Veterinary Research Institut Poland, PIWet-PIB	National Veterinary Research Institut Poland, PIWet-PIB	Swieton, E.;Domanska-Blicharz, K.;Tarasiuk, K.; Wyrostek, K.;Stys-Fijol, N.
EPI2616159	NP	Poland	2023-Jun-24	EPI_ISL_17971990	A/domestic_cat/Poland/H256-G/2023(H5N1)	National Veterinary Research Institut Poland, PIWet-PIB	National Veterinary Research Institut Poland, PIWet-PIB	Swieton, E.;Domanska-Blicharz, K.;Tarasiuk, K.; Wyrostek, K.;Stys-Fijol, N.
EPI2616151	NP	Poland	2023-Jun-21	EPI_ISL_17971989	A/domestic_cat/Poland/H255-M/2023(H5N1)	National Veterinary Research Institut Poland, PIWet-PIB	National Veterinary Research Institut Poland, PIWet-PIB	Swieton, E.;Domanska-Blicharz, K.;Tarasiuk, K.; Wyrostek, K.;Stys-Fijol, N.
EPI2610822	NP	Poland	2023-Jun-19	EPI_ISL_17951056	A/domestic_cat/Poland/Kot1/2023	National Veterinary Research Institut Poland, PIWet-PIB	National Veterinary Research Institut Poland, PIWet-PIB	Edyta,≈öwiƒôto≈Ñ; Katarzyna,Doma≈Ñska-Blicharz; Aleksandra,Giza; Marta,Pietruk; Karolina,Tarasiuk; Krzysztof,Wyrostek; Natalia, Sty≈õ-Fijo≈Ç
EPI2610814	NP	Poland	2023-Jun-20	EPI_ISL_17951055	A/domestic_cat/Poland/H247/2023	National Veterinary Research Institut Poland, PIWet-PIB	National Veterinary Research Institut Poland, PIWet-PIB	Edyta,≈öwiƒôto≈Ñ; Katarzyna,Doma≈Ñska-Blicharz; Aleksandra,Giza; Marta,Pietruk; Karolina,Tarasiuk; Krzysztof,Wyrostek; Natalia, Sty≈õ-Fijo≈Ç
EPI2610806	NP	Poland	2023-Jun-15	EPI_ISL_17951054	A/domestic_cat/Poland/H248/2023	National Veterinary Research Institut Poland, PIWet-PIB	National Veterinary Research Institut Poland, PIWet-PIB	Edyta,≈öwiƒôto≈Ñ; Katarzyna,Doma≈Ñska-Blicharz; Aleksandra,Giza; Marta,Pietruk; Karolina,Tarasiuk; Krzysztof,Wyrostek; Natalia, Sty≈õ-Fijo≈Ç
EPI2610798	NP	Poland	2023-Jun-22	EPI_ISL_17951053	A/domestic_cat/Poland/H254/2023	National Veterinary Research Institut Poland, PIWet-PIB	National Veterinary Research Institut Poland, PIWet-PIB	Edyta,≈öwiƒôto≈Ñ; Katarzyna,Doma≈Ñska-Blicharz; Aleksandra,Giza; Marta,Pietruk; Karolina,Tarasiuk; Krzysztof,Wyrostek; Natalia, Sty≈õ-Fijo≈Ç
EPI2610790	NP	Poland	2023-Jun-22	EPI_ISL_17951052	A/domestic_cat/Poland/H253/2023	National Veterinary Research Institut Poland, PIWet-PIB	National Veterinary Research Institut Poland, PIWet-PIB	Edyta,≈öwiƒôto≈Ñ; Katarzyna,Doma≈Ñska-Blicharz; Aleksandra,Giza; Marta,Pietruk; Karolina,Tarasiuk; Krzysztof,Wyrostek; Natalia, Sty≈õ-Fijo≈Ç
EPI2610774	NP	Poland	2023-Jun-22	EPI_ISL_17950995	A/domestic_cat/Poland/H249/2023	National Veterinary Research Institut Poland, PIWet-PIB	National Veterinary Research Institut Poland, PIWet-PIB	Edyta,≈öwiƒôto≈Ñ; Katarzyna,Doma≈Ñska-Blicharz; Aleksandra,Giza; Marta,Pietruk; Karolina,Tarasiuk; Krzysztof,Wyrostek; Natalia, Sty≈õ-Fijo≈Ç
EPI2603672	NP	United States	2023-Mar-30	EPI_ISL_17821770	A/cat/Nebraska/23-010184-001/2023	Nebraska Veterinary Diagnostic Center	National Veterinary Services Laboratories - USDA	Chinh,Thanh;Franzen,Kerrie;Love,Emily;Ozella,Mikaela;Killian,Mary;Lantz,Kristina;Stuber,Tod;Hicks,Jessica;Norris,Cameron
EPI2281679	NP	France	2022-Dec-24	EPI_ISL_16395206	A/cat/France/22P026544/2022	Anses (Ploufragan-Plouzan√©)	ANSES Agence Nationale De Securite Sanitaire De L‚Äôalimentation
EPI2917769	NP	Finland	2023-Oct-17	EPI_ISL_18771245	A/white mink/Finland/UH-361-E1/2023	University of Helsinki, Department of Virology	Finnish Institute for Health and Welfare, THL	Altan, E; Avelin, V; Lindh, E; Savolainen-Kopra, C; Sironen, T; √ñsterlund, P.
EPI2917760	NP	Finland	2023-Oct-17	EPI_ISL_18771244	A/white mink/Finland/UH-357-E1/2023	University of Helsinki, Department of Virology	Finnish Institute for Health and Welfare, THL	Altan, E; Avelin, V; Lindh, E; Savolainen-Kopra, C; Sironen, T; √ñsterlund, P.
EPI2917730	NP	Finland	2023-Oct-17	EPI_ISL_18771178	A/white mink/Finland/UH-353-E1/2023	University of Helsinki, Department of Virology	Finnish Institute for Health and Welfare, THL	Altan, E; Avelin, V; Lindh, E; Savolainen-Kopra, C; Sironen, T; √ñsterlund, P.
EPI2907891	NP	Finland	2023-Sep-20	EPI_ISL_18755130	A/mink/Finland/3082/2023	Finnish Food Authority	Finnish Food Authority	Kauppinen, Ari; Kareinen, Lauri; Tammiranta, Niina; Kantala, Tuija; Fusaro, Alice; Gadd, Tuija
EPI2907883	NP	Finland	2023-Sep-20	EPI_ISL_18755129	A/mink/Finland/3080/2023	Finnish Food Authority	Finnish Food Authority	Kauppinen, Ari; Kareinen, Lauri; Tammiranta, Niina; Kantala, Tuija; Fusaro, Alice; Gadd, Tuija
EPI2755652	NP	Finland	2023-Aug-07	EPI_ISL_18290480	A/mink/Finland/735/2023	Finnish Food Authority	Finnish Food Authority	Kauppinen, Ari; Kareinen, Lauri; Tammiranta, Niina; Kantala, Tuija; Fusaro, Alice; Gadd, Tuija
EPI2755560	NP	Finland	2023-Jul-03	EPI_ISL_18290468	A/mink/Finland/1003/2023	Finnish Food Authority	Finnish Food Authority	Kauppinen, Ari; Kareinen, Lauri; Tammiranta, Niina; Kantala, Tuija; Fusaro, Alice; Gadd, Tuija
EPI2755766	NP	Finland	2023-Jul-03	EPI_ISL_18290467	A/mink/Finland/1002/2023	Finnish Food Authority	Finnish Food Authority	Kauppinen, Ari; Kareinen, Lauri; Tammiranta, Niina; Kantala, Tuija; Fusaro, Alice; Gadd, Tuija
EPI2641536	NP	Finland	2023-Jul-03	EPI_ISL_18011231	A/mink/Finland/1002_23VIR6803-8/2023	Finnish Food Authority	Istituto Zooprofilattico Sperimentale Delle Venezie	Kantala, T.;Kauppinen, A.;Kareinen, L.;Gadd, T.;Galiano, M.;Ikonen, N.;Lindh, E.;Ormelli, S.;Varotto, M.;Zecchin, B.;Pastori, A.;Fusaro, A.;Zamperin, G.;Monne, I.;Terregino, C
EPI2536824	NP	Netherlands	2022-Jan-16	EPI_ISL_17583227	A/Stone Marten/Netherlands/EMC1/2022	Erasmus Medical Center	Erasmus Medical Center	Vuong,O;Thewessen, S;Bellido-Martin,A.B; Chestakova, I; Sikkema, R;Fouchier, R.A.M.
EPI2061044	NP	Netherlands	2022-Mar-05	EPI_ISL_13201074	A/European polecat/Netherlands/1/2022	Erasmus Medical Center	Erasmus Medical Center
EPI1965222	NP	Netherlands	2022-Jan-17	EPI_ISL_9111104	A/otter/Netherlands/22001014-005/2022	Wageningen Bioveterinary Research	Wageningen Bioveterinary Research	Beerens, Nancy; Harders, Frank; Pritz-Verschuren, Sylvia; Roose, Marit; Venema, Sandra; Germeraad, Evelien; Engelsma, Marc; Heutink, Rene
EPI3261180	NP	United States	2024-Mar-20	EPI_ISL_19094660	A/domestic cat/Oklahoma/24_009118-002/2024	United States Department of Agriculture, Agricultural Research Service, National Animal Disease Center	United States Department of Agriculture, Agricultural Research Service, National Animal Disease Center	Nguyen,T., Hutter,C., Markin,A., Thomas,M., Lantz,K., Killian,M.L., Janzen,G.M., Vijendran,S., Wagle,S., Inderski,B., Magstadt,D.R., Li,G., Diel,D.G., Frye,E.A., Dimitrov,K.M., Swinford,A.K., Thompson,A.C., Snevik,K.R., Suarez,D.L., Spackman,E., Lakin,S.M., C,S., Johnson,K.R., Baker,A.L., Robbe-Austerman,S., Torchetti,M.K.; Anderson,T.K.
EPI3255570	NP	United States	2024-Mar-20	EPI_ISL_19088568	A/feline/Texas/24-029329-02/2024	Iowa State University, Veterinary Microbiology and Preventive Medicine Faculty	Iowa State University, Veterinary Microbiology and Preventive Medicine Faculty	Burrough,E.R., Magstadt,D.R., Petersen,B., Timmermans,S.J., Gauger,P.C., Zhang,J., Siepker,C., Mainenti,M., Li,G., Thompson,A.C., Gorden,P.J., Plummer,P.J.; Main,R.
EPI3255578	NP	United States	2024-Mar-20	EPI_ISL_19088567	A/feline/Texas/24-029329-01/2024	Iowa State University, Veterinary Microbiology and Preventive Medicine Faculty	Iowa State University, Veterinary Microbiology and Preventive Medicine Faculty	Burrough,E.R., Magstadt,D.R., Petersen,B., Timmermans,S.J., Gauger,P.C., Zhang,J., Siepker,C., Mainenti,M., Li,G., Thompson,A.C., Gorden,P.J., Plummer,P.J.; Main,R.
EPI3208228	NP	United States	2023-Jan-01	EPI_ISL_19054399	A/feline/USA/23-037332-001/2023	National Veterinary Services Laboratories - USDA	National Veterinary Services Laboratories - USDA	Aufderhar,Matthew;Franzen,Kerrie;Love,Emily;Killian,Mary;Lantz,Kristina;Stuber,Tod;Hicks,Jessica;Norris,Cameron
EPI3208220	NP	United States	2024-Mar-16	EPI_ISL_19054398	A/feline/USA/24-009311-006/2024	National Veterinary Services Laboratories - USDA	National Veterinary Services Laboratories - USDA	Aufderhar,Matthew;Franzen,Kerrie;Love,Emily;Killian,Mary;Lantz,Kristina;Stuber,Tod;Hicks,Jessica;Norris,Cameron
EPI3208212	NP	United States	2024-Mar-16	EPI_ISL_19054397	A/feline/Texas/24-009311-004/2024	National Veterinary Services Laboratories - USDA	National Veterinary Services Laboratories - USDA	Aufderhar,Matthew;Franzen,Kerrie;Love,Emily;Killian,Mary;Lantz,Kristina;Stuber,Tod;Hicks,Jessica;Norris,Cameron
EPI3208204	NP	United States	2024-Mar-20	EPI_ISL_19054396	A/feline/New Mexico/24-009116-005/2024	National Veterinary Services Laboratories - USDA	National Veterinary Services Laboratories - USDA	Aufderhar,Matthew;Franzen,Kerrie;Love,Emily;Killian,Mary;Lantz,Kristina;Stuber,Tod;Hicks,Jessica;Norris,Cameron
EPI3208196	NP	United States	2024-Mar-20	EPI_ISL_19054395	A/feline/New Mexico/24-009116-004/2024	National Veterinary Services Laboratories - USDA	National Veterinary Services Laboratories - USDA	Aufderhar,Matthew;Franzen,Kerrie;Love,Emily;Killian,Mary;Lantz,Kristina;Stuber,Tod;Hicks,Jessica;Norris,Cameron
EPI3208188	NP	United States	2024-Mar-20	EPI_ISL_19054394	A/feline/New Mexico/24-009116-002/2024	National Veterinary Services Laboratories - USDA	National Veterinary Services Laboratories - USDA	Aufderhar,Matthew;Franzen,Kerrie;Love,Emily;Killian,Mary;Lantz,Kristina;Stuber,Tod;Hicks,Jessica;Norris,Cameron
EPI3208180	NP	United States	2024-Mar-20	EPI_ISL_19054393	A/feline/Texas/24-008850-002/2024	National Veterinary Services Laboratories - USDA	National Veterinary Services Laboratories - USDA	Aufderhar,Matthew;Franzen,Kerrie;Love,Emily;Killian,Mary;Lantz,Kristina;Stuber,Tod;Hicks,Jessica;Norris,Cameron
EPI3208172	NP	United States	2024-Mar-20	EPI_ISL_19054392	A/feline/Texas/24-008850-001/2024	National Veterinary Services Laboratories - USDA	National Veterinary Services Laboratories - USDA	Aufderhar,Matthew;Franzen,Kerrie;Love,Emily;Killian,Mary;Lantz,Kristina;Stuber,Tod;Hicks,Jessica;Norris,Cameron
EPI3208164	NP	United States	2024-Mar-22	EPI_ISL_19054391	A/feline/Texas/24-008764-002/2024	National Veterinary Services Laboratories - USDA	National Veterinary Services Laboratories - USDA	Aufderhar,Matthew;Franzen,Kerrie;Love,Emily;Killian,Mary;Lantz,Kristina;Stuber,Tod;Hicks,Jessica;Norris,Cameron
EPI3208156	NP	United States	2024-Mar-22	EPI_ISL_19054390	A/feline/Texas/24-008764-001/2024	National Veterinary Services Laboratories - USDA	National Veterinary Services Laboratories - USDA	Aufderhar,Matthew;Franzen,Kerrie;Love,Emily;Killian,Mary;Lantz,Kristina;Stuber,Tod;Hicks,Jessica;Norris,Cameron
EPI3261252	NP	United States	2024-Mar-08	EPI_ISL_19094669	A/goat/Minnesota/24_007234-035/2024	United States Department of Agriculture, Agricultural Research Service, National Animal Disease Center	United States Department of Agriculture, Agricultural Research Service, National Animal Disease Center	Nguyen,T., Hutter,C., Markin,A., Thomas,M., Lantz,K., Killian,M.L., Janzen,G.M., Vijendran,S., Wagle,S., Inderski,B., Magstadt,D.R., Li,G., Diel,D.G., Frye,E.A., Dimitrov,K.M., Swinford,A.K., Thompson,A.C., Snevik,K.R., Suarez,D.L., Spackman,E., Lakin,S.M., C,S., Johnson,K.R., Baker,A.L., Robbe-Austerman,S., Torchetti,M.K.; Anderson,T.K.
EPI3261244	NP	United States	2024-Mar-08	EPI_ISL_19094668	A/goat/Minnesota/24_007234-034/2024	United States Department of Agriculture, Agricultural Research Service, National Animal Disease Center	United States Department of Agriculture, Agricultural Research Service, National Animal Disease Center	Nguyen,T., Hutter,C., Markin,A., Thomas,M., Lantz,K., Killian,M.L., Janzen,G.M., Vijendran,S., Wagle,S., Inderski,B., Magstadt,D.R., Li,G., Diel,D.G., Frye,E.A., Dimitrov,K.M., Swinford,A.K., Thompson,A.C., Snevik,K.R., Suarez,D.L., Spackman,E., Lakin,S.M., C,S., Johnson,K.R., Baker,A.L., Robbe-Austerman,S., Torchetti,M.K.; Anderson,T.K.
EPI3261236	NP	United States	2024-Mar-08	EPI_ISL_19094667	A/goat/Minnesota/24_007234-032/2024	United States Department of Agriculture, Agricultural Research Service, National Animal Disease Center	United States Department of Agriculture, Agricultural Research Service, National Animal Disease Center	Nguyen,T., Hutter,C., Markin,A., Thomas,M., Lantz,K., Killian,M.L., Janzen,G.M., Vijendran,S., Wagle,S., Inderski,B., Magstadt,D.R., Li,G., Diel,D.G., Frye,E.A., Dimitrov,K.M., Swinford,A.K., Thompson,A.C., Snevik,K.R., Suarez,D.L., Spackman,E., Lakin,S.M., C,S., Johnson,K.R., Baker,A.L., Robbe-Austerman,S., Torchetti,M.K.; Anderson,T.K.
EPI3261228	NP	United States	2024-Mar-08	EPI_ISL_19094666	A/goat/Minnesota/24_007234-030/2024	United States Department of Agriculture, Agricultural Research Service, National Animal Disease Center	United States Department of Agriculture, Agricultural Research Service, National Animal Disease Center	Nguyen,T., Hutter,C., Markin,A., Thomas,M., Lantz,K., Killian,M.L., Janzen,G.M., Vijendran,S., Wagle,S., Inderski,B., Magstadt,D.R., Li,G., Diel,D.G., Frye,E.A., Dimitrov,K.M., Swinford,A.K., Thompson,A.C., Snevik,K.R., Suarez,D.L., Spackman,E., Lakin,S.M., C,S., Johnson,K.R., Baker,A.L., Robbe-Austerman,S., Torchetti,M.K.; Anderson,T.K.
EPI3261220	NP	United States	2024-Mar-08	EPI_ISL_19094665	A/goat/Minnesota/24_007234-029/2024	United States Department of Agriculture, Agricultural Research Service, National Animal Disease Center	United States Department of Agriculture, Agricultural Research Service, National Animal Disease Center	Nguyen,T., Hutter,C., Markin,A., Thomas,M., Lantz,K., Killian,M.L., Janzen,G.M., Vijendran,S., Wagle,S., Inderski,B., Magstadt,D.R., Li,G., Diel,D.G., Frye,E.A., Dimitrov,K.M., Swinford,A.K., Thompson,A.C., Snevik,K.R., Suarez,D.L., Spackman,E., Lakin,S.M., C,S., Johnson,K.R., Baker,A.L., Robbe-Austerman,S., Torchetti,M.K.; Anderson,T.K.
EPI3261092	NP	United States	2024-Mar-08	EPI_ISL_19094649	A/goat/Minnesota/24_007234-036/2024	United States Department of Agriculture, Agricultural Research Service, National Animal Disease Center	United States Department of Agriculture, Agricultural Research Service, National Animal Disease Center	Nguyen,T., Hutter,C., Markin,A., Thomas,M., Lantz,K., Killian,M.L., Janzen,G.M., Vijendran,S., Wagle,S., Inderski,B., Magstadt,D.R., Li,G., Diel,D.G., Frye,E.A., Dimitrov,K.M., Swinford,A.K., Thompson,A.C., Snevik,K.R., Suarez,D.L., Spackman,E., Lakin,S.M., C,S., Johnson,K.R., Baker,A.L., Robbe-Austerman,S., Torchetti,M.K.; Anderson,T.K.
EPI3261084	NP	United States	2024-Mar-08	EPI_ISL_19094648	A/goat/Minnesota/24_007234-037/2024	United States Department of Agriculture, Agricultural Research Service, National Animal Disease Center	United States Department of Agriculture, Agricultural Research Service, National Animal Disease Center	Nguyen,T., Hutter,C., Markin,A., Thomas,M., Lantz,K., Killian,M.L., Janzen,G.M., Vijendran,S., Wagle,S., Inderski,B., Magstadt,D.R., Li,G., Diel,D.G., Frye,E.A., Dimitrov,K.M., Swinford,A.K., Thompson,A.C., Snevik,K.R., Suarez,D.L., Spackman,E., Lakin,S.M., C,S., Johnson,K.R., Baker,A.L., Robbe-Austerman,S., Torchetti,M.K.; Anderson,T.K.
EPI3261076	NP	United States	2024-Mar-08	EPI_ISL_19094647	A/goat/Minnesota/24_007234-044/2024	United States Department of Agriculture, Agricultural Research Service, National Animal Disease Center	United States Department of Agriculture, Agricultural Research Service, National Animal Disease Center	Nguyen,T., Hutter,C., Markin,A., Thomas,M., Lantz,K., Killian,M.L., Janzen,G.M., Vijendran,S., Wagle,S., Inderski,B., Magstadt,D.R., Li,G., Diel,D.G., Frye,E.A., Dimitrov,K.M., Swinford,A.K., Thompson,A.C., Snevik,K.R., Suarez,D.L., Spackman,E., Lakin,S.M., C,S., Johnson,K.R., Baker,A.L., Robbe-Austerman,S., Torchetti,M.K.; Anderson,T.K.
EPI3261068	NP	United States	2024-Mar-08	EPI_ISL_19094646	A/goat/Minnesota/24_007234-047/2024	United States Department of Agriculture, Agricultural Research Service, National Animal Disease Center	United States Department of Agriculture, Agricultural Research Service, National Animal Disease Center	Nguyen,T., Hutter,C., Markin,A., Thomas,M., Lantz,K., Killian,M.L., Janzen,G.M., Vijendran,S., Wagle,S., Inderski,B., Magstadt,D.R., Li,G., Diel,D.G., Frye,E.A., Dimitrov,K.M., Swinford,A.K., Thompson,A.C., Snevik,K.R., Suarez,D.L., Spackman,E., Lakin,S.M., C,S., Johnson,K.R., Baker,A.L., Robbe-Austerman,S., Torchetti,M.K.; Anderson,T.K.
EPI3260996	NP	United States	2024-Feb-23	EPI_ISL_19094637	A/skunk/Washington/24_005959-006/2024	United States Department of Agriculture, Agricultural Research Service, National Animal Disease Center	United States Department of Agriculture, Agricultural Research Service, National Animal Disease Center	Nguyen,T., Hutter,C., Markin,A., Thomas,M., Lantz,K., Killian,M.L., Janzen,G.M., Vijendran,S., Wagle,S., Inderski,B., Magstadt,D.R., Li,G., Diel,D.G., Frye,E.A., Dimitrov,K.M., Swinford,A.K., Thompson,A.C., Snevik,K.R., Suarez,D.L., Spackman,E., Lakin,S.M., C,S., Johnson,K.R., Baker,A.L., Robbe-Austerman,S., Torchetti,M.K.; Anderson,T.K.
EPI3260988	NP	United States	2024-Feb-23	EPI_ISL_19094636	A/skunk/Washington/24_005959-005/2024	United States Department of Agriculture, Agricultural Research Service, National Animal Disease Center	United States Department of Agriculture, Agricultural Research Service, National Animal Disease Center	Nguyen,T., Hutter,C., Markin,A., Thomas,M., Lantz,K., Killian,M.L., Janzen,G.M., Vijendran,S., Wagle,S., Inderski,B., Magstadt,D.R., Li,G., Diel,D.G., Frye,E.A., Dimitrov,K.M., Swinford,A.K., Thompson,A.C., Snevik,K.R., Suarez,D.L., Spackman,E., Lakin,S.M., C,S., Johnson,K.R., Baker,A.L., Robbe-Austerman,S., Torchetti,M.K.; Anderson,T.K.
EPI3260980	NP	United States	2024-Feb-23	EPI_ISL_19094635	A/skunk/Washington/24_005959-004/2024	United States Department of Agriculture, Agricultural Research Service, National Animal Disease Center	United States Department of Agriculture, Agricultural Research Service, National Animal Disease Center	Nguyen,T., Hutter,C., Markin,A., Thomas,M., Lantz,K., Killian,M.L., Janzen,G.M., Vijendran,S., Wagle,S., Inderski,B., Magstadt,D.R., Li,G., Diel,D.G., Frye,E.A., Dimitrov,K.M., Swinford,A.K., Thompson,A.C., Snevik,K.R., Suarez,D.L., Spackman,E., Lakin,S.M., C,S., Johnson,K.R., Baker,A.L., Robbe-Austerman,S., Torchetti,M.K.; Anderson,T.K.
EPI3260972	NP	United States	2024-Mar-23	EPI_ISL_19094634	A/raccoon/New Mexico/24_009496-002/2024	United States Department of Agriculture, Agricultural Research Service, National Animal Disease Center	United States Department of Agriculture, Agricultural Research Service, National Animal Disease Center	Nguyen,T., Hutter,C., Markin,A., Thomas,M., Lantz,K., Killian,M.L., Janzen,G.M., Vijendran,S., Wagle,S., Inderski,B., Magstadt,D.R., Li,G., Diel,D.G., Frye,E.A., Dimitrov,K.M., Swinford,A.K., Thompson,A.C., Snevik,K.R., Suarez,D.L., Spackman,E., Lakin,S.M., C,S., Johnson,K.R., Baker,A.L., Robbe-Austerman,S., Torchetti,M.K.; Anderson,T.K.
EPI3260940	NP	United States	2024-Mar-08	EPI_ISL_19094630	A/goat/Minnesota/24_007234-050/2024	United States Department of Agriculture, Agricultural Research Service, National Animal Disease Center	United States Department of Agriculture, Agricultural Research Service, National Animal Disease Center	Nguyen,T., Hutter,C., Markin,A., Thomas,M., Lantz,K., Killian,M.L., Janzen,G.M., Vijendran,S., Wagle,S., Inderski,B., Magstadt,D.R., Li,G., Diel,D.G., Frye,E.A., Dimitrov,K.M., Swinford,A.K., Thompson,A.C., Snevik,K.R., Suarez,D.L., Spackman,E., Lakin,S.M., C,S., Johnson,K.R., Baker,A.L., Robbe-Austerman,S., Torchetti,M.K.; Anderson,T.K.
EPI3260932	NP	United States	2024-Mar-08	EPI_ISL_19094629	A/goat/Minnesota/24_007234-048/2024	United States Department of Agriculture, Agricultural Research Service, National Animal Disease Center	United States Department of Agriculture, Agricultural Research Service, National Animal Disease Center	Nguyen,T., Hutter,C., Markin,A., Thomas,M., Lantz,K., Killian,M.L., Janzen,G.M., Vijendran,S., Wagle,S., Inderski,B., Magstadt,D.R., Li,G., Diel,D.G., Frye,E.A., Dimitrov,K.M., Swinford,A.K., Thompson,A.C., Snevik,K.R., Suarez,D.L., Spackman,E., Lakin,S.M., C,S., Johnson,K.R., Baker,A.L., Robbe-Austerman,S., Torchetti,M.K.; Anderson,T.K.
EPI3244336	NP	United States	2024-Feb-26	EPI_ISL_19083124	A/Mountain Lion/Montana/01/2024	Montana Public Health Laboratory	National Institute of Allergy and Infectious Diseases NIAID/NIH	Williamson, Brandi; Anzick, Sarah; Yinda, C. Kwe; Beare, Paul; Kanakabandi, Kishore; Martens, Craig; de Wit, Emmie; Munster, Vincent
EPI3229801	NP	Uruguay	2023-Sep-06	EPI_ISL_19070498	A/pinniped/Uruguay/P4_6923/2023	Universidad de la Rep√∫blica, Facultad de Ciencias, Genetica Evolutiva/Divisi√≥n de Laboratorios Veterinarios, Plataforma Genomica		Tomas,G., Marandino,A., Panzera,Y., Rodriguez,S., Wallau,G.L., Dezordi,F.Z., Perez,R., Bassetti,L., Negro,R., Williman,J., Uriarte,V., Grazioli,F., Leizagoyen,C., Riveron,S., Coronel,J., Bello,S., Paez,E., Lima,M., Mendez,V.; Perez,R.
EPI3229728	NP	Uruguay	2023-Sep-14	EPI_ISL_19070486	A/pinniped/Uruguay/P18_14923/2023	Universidad de la Rep√∫blica, Facultad de Ciencias, Genetica Evolutiva/Divisi√≥n de Laboratorios Veterinarios, Plataforma Genomica		Tomas,G., Marandino,A., Panzera,Y., Rodriguez,S., Wallau,G.L., Dezordi,F.Z., Perez,R., Bassetti,L., Negro,R., Williman,J., Uriarte,V., Grazioli,F., Leizagoyen,C., Riveron,S., Coronel,J., Bello,S., Paez,E., Lima,M., Mendez,V.; Perez,R.
EPI3229720	NP	Uruguay	2023-Sep-14	EPI_ISL_19070485	A/pinniped/Uruguay/P17_14923/2023	Universidad de la Rep√∫blica, Facultad de Ciencias, Genetica Evolutiva/Divisi√≥n de Laboratorios Veterinarios, Plataforma Genomica		Tomas,G., Marandino,A., Panzera,Y., Rodriguez,S., Wallau,G.L., Dezordi,F.Z., Perez,R., Bassetti,L., Negro,R., Williman,J., Uriarte,V., Grazioli,F., Leizagoyen,C., Riveron,S., Coronel,J., Bello,S., Paez,E., Lima,M., Mendez,V.; Perez,R.
EPI3229706	NP	Uruguay	2023-Sep-11	EPI_ISL_19070483	A/pinniped/Uruguay/P14_11923/2023	Universidad de la Rep√∫blica, Facultad de Ciencias, Genetica Evolutiva/Divisi√≥n de Laboratorios Veterinarios, Plataforma Genomica		Tomas,G., Marandino,A., Panzera,Y., Rodriguez,S., Wallau,G.L., Dezordi,F.Z., Perez,R., Bassetti,L., Negro,R., Williman,J., Uriarte,V., Grazioli,F., Leizagoyen,C., Riveron,S., Coronel,J., Bello,S., Paez,E., Lima,M., Mendez,V.; Perez,R.
EPI3229698	NP	Uruguay	2023-Sep-11	EPI_ISL_19070482	A/pinniped/Uruguay/P13_11923/2023	Universidad de la Rep√∫blica, Facultad de Ciencias, Genetica Evolutiva/Divisi√≥n de Laboratorios Veterinarios, Plataforma Genomica		Tomas,G., Marandino,A., Panzera,Y., Rodriguez,S., Wallau,G.L., Dezordi,F.Z., Perez,R., Bassetti,L., Negro,R., Williman,J., Uriarte,V., Grazioli,F., Leizagoyen,C., Riveron,S., Coronel,J., Bello,S., Paez,E., Lima,M., Mendez,V.; Perez,R.
EPI3229690	NP	Uruguay	2023-Sep-08	EPI_ISL_19070481	A/pinniped/Uruguay/P10_8923/2023	Universidad de la Rep√∫blica, Facultad de Ciencias, Genetica Evolutiva/Divisi√≥n de Laboratorios Veterinarios, Plataforma Genomica		Tomas,G., Marandino,A., Panzera,Y., Rodriguez,S., Wallau,G.L., Dezordi,F.Z., Perez,R., Bassetti,L., Negro,R., Williman,J., Uriarte,V., Grazioli,F., Leizagoyen,C., Riveron,S., Coronel,J., Bello,S., Paez,E., Lima,M., Mendez,V.; Perez,R.
EPI3162326	NP	United States	2024-Mar-08	EPI_ISL_19015125	A/goat/Minnesota/24-007234-009/2024	National Veterinary Services Laboratories - USDA	National Veterinary Services Laboratories - USDA	Aufderhar,Matthew;Franzen,Kerrie;Love,Emily;Killian,Mary;Lantz,Kristina;Stuber,Tod;Hicks,Jessica;Norris,Cameron
EPI3162318	NP	United States	2024-Mar-08	EPI_ISL_19015124	A/goat/Minnesota/24-007234-006/2024	National Veterinary Services Laboratories - USDA	National Veterinary Services Laboratories - USDA	Aufderhar,Matthew;Franzen,Kerrie;Love,Emily;Killian,Mary;Lantz,Kristina;Stuber,Tod;Hicks,Jessica;Norris,Cameron
EPI3162310	NP	United States	2024-Mar-08	EPI_ISL_19015123	A/goat/Minnesota/24-007234-003/2024	National Veterinary Services Laboratories - USDA	National Veterinary Services Laboratories - USDA	Aufderhar,Matthew;Franzen,Kerrie;Love,Emily;Killian,Mary;Lantz,Kristina;Stuber,Tod;Hicks,Jessica;Norris,Cameron
EPI3110585	NP	United States	2023-Oct-01	EPI_ISL_18976667	A/polar bear/Alaska/23-038123/2023	United States Department of Agriculture, National Veterinary Services Laboratories-Diagnostic Virology Laboratory	National Veterinary Services Laboratories - USDA	Franzen,Kerrie;Love,Emily;Ozella,Mikaela;Killian,Mary;Lantz,Kristina;Stuber,Tod;Hicks,Jessica;Norris,Cameron
EPI3084242	NP	Argentina	2023-Aug-26	EPI_ISL_18945320	A/South American fur seal/Argentina/RN-PB019/2023	Instituto Nacional de Tecnologia Agropecuaria, Instituto de Virologia e Innovaciones Tecnologicas		Rimondi,A., Vanstreels,R.E.T., Olivera,V.S., Donini,A., Miqueo Lauriente,M.; Uhart,M.
EPI2759132	NP	United States	2023-Aug-29	EPI_ISL_18311028	A/harbor seal/Washington/23-026504-002/2023	National Veterinary Services Laboratories - USDA	National Veterinary Services Laboratories - USDA	Chinh,Thanh;Franzen,Kerrie;Love,Emily;Ozella,Mikaela;Killian,Mary;Lantz,Kristina;Stuber,Tod;Hicks,Jessica;Norris,Cameron
EPI2759124	NP	United States	2023-Aug-29	EPI_ISL_18311027	A/harbor seal/Washington/23-026504-001/2023	National Veterinary Services Laboratories - USDA	National Veterinary Services Laboratories - USDA	Chinh,Thanh;Franzen,Kerrie;Love,Emily;Ozella,Mikaela;Killian,Mary;Lantz,Kristina;Stuber,Tod;Hicks,Jessica;Norris,Cameron
EPI2759108	NP	United States	2023-Aug-25	EPI_ISL_18311025	A/harbor seal/Washington/23-025991-001/2023	National Veterinary Services Laboratories - USDA	National Veterinary Services Laboratories - USDA	Chinh,Thanh;Franzen,Kerrie;Love,Emily;Ozella,Mikaela;Killian,Mary;Lantz,Kristina;Stuber,Tod;Hicks,Jessica;Norris,Cameron
EPI2759100	NP	United States	2023-Aug-19	EPI_ISL_18311024	A/harbor seal/Washington/23-025744-002/2023	National Veterinary Services Laboratories - USDA	National Veterinary Services Laboratories - USDA	Chinh,Thanh;Franzen,Kerrie;Love,Emily;Ozella,Mikaela;Killian,Mary;Lantz,Kristina;Stuber,Tod;Hicks,Jessica;Norris,Cameron
EPI2759092	NP	United States	2023-Aug-19	EPI_ISL_18311023	A/harbor seal/Washington/23-025744-001/2023	National Veterinary Services Laboratories - USDA	National Veterinary Services Laboratories - USDA	Chinh,Thanh;Franzen,Kerrie;Love,Emily;Ozella,Mikaela;Killian,Mary;Lantz,Kristina;Stuber,Tod;Hicks,Jessica;Norris,Cameron
EPI2745243	NP	Peru	2022-Nov-22	EPI_ISL_18265431	A/dolphin/Peru/PIU-SER002/2022	Servicio Nacional Forestal y de Fauna Silvestre (SERFOR)	Pontificia Universidad Catolica del Peru	Leguia,M.; Garcia-Glaessner,A.; Munoz-Saavedra,B.; Juarez,D.; Barrera,P.; Jara,J.; Silva,W.; Ploog,K.; Colchao-Claux,P.; Lescano,J.
EPI2664224	NP	Peru	2022-Nov-22	EPI_ISL_18054503	A/dolphin/Peru/PIU-002/2022			Leguia,M., Garcia-Glaessner,A., Munoz-Saavedra,B., Juarez,D., Barrera,P., Jara,J., Silva,W., Ploog,K., Colchao-Claux,P.; Lescano,J.
EPI2471929	NP	United Kingdom	2022-Nov-18	EPI_ISL_17257532	A/Bush_dog/England/037680/2022	Animal and Plant Health Agency (APHA)	Animal and Plant Health Agency (APHA)
EPI2467162	NP	France	2022-Nov-07	EPI_ISL_17233426	A/bear/France/23P002848/2022	Anses (Ploufragan-Plouzan√©)	ANSES Agence Nationale De Securite Sanitaire De L‚Äôalimentation	FX,Briand
EPI2437548	NP	Canada	2022-May-18	EPI_ISL_17073215	A/striped_skunk/BC/AIVPHL-118/2022	B.C. Centre for Disease Control	British Columbia Centre for Disease Control	Himsworth, Chelsea; Prystajecky,Natalie; Tyson,John; Jassem,Agatha; Kuchinski,Kevin; Coombe, Michelle; Lee,Tracy; Azana,Rob; Fung,Janet; Chan,Michael; Cheung,Branco; Caleta,Jessica; Tsang,Frankie; Russell,Shannon; Zlosnik,James; Hoang,Linda
EPI2437036	NP	Belgium	2023-Feb-09	EPI_ISL_17072114	A/Mustela_putorius/Belgium/01421_0001/2023	Sciensano - Animal Infectious Diseases	Sciensano, Department of Animal Infectious Diseases	Van Borm, Steven; Roupie, Virginie; Hostyn, Pierre; Mathijs, Elisabeth; Lambrecht, Benedicte; Steensels, Mieke
EPI2437037	NP	Belgium	2023-Feb-09	EPI_ISL_17072114	A/Mustela_putorius/Belgium/01421_0001/2023	Sciensano - Animal Infectious Diseases	Sciensano, Department of Animal Infectious Diseases	Van Borm, Steven; Roupie, Virginie; Hostyn, Pierre; Mathijs, Elisabeth; Lambrecht, Benedicte; Steensels, Mieke
EPI2263643	NP	United States	2022-Nov-15	EPI_ISL_16297122	A/skunk/Wisconsin/22-037029-001/2022	National Veterinary Services Laboratories - USDA	National Veterinary Services Laboratories - USDA	Chinh,Thanh;Love, Emily;Franzen,Kerrie;Killian,Mary;Koster,Leo;Lantz,Kristina;Stuber,Tod;Hicks,Jessica
EPI2263435	NP	United States	2022-Oct-21	EPI_ISL_16297066	A/skunk/Minnesota/22-034925-001/2022	National Veterinary Services Laboratories - USDA	National Veterinary Services Laboratories - USDA	Chinh,Thanh;Love, Emily;Franzen,Kerrie;Killian,Mary;Koster,Leo;Lantz,Kristina;Stuber,Tod;Hicks,Jessica
EPI2236753	NP	Canada	2022-Apr-26	EPI_ISL_16023453	A/Skunk/AB/FAV-0416-03/2022	Alberta Agriculture and Forestry, Government of Alberta	Canadian Food Inspection Agency	Alkie, Tamiru; Hicks, Mark; Pybuse, Margo J; Xu, Wanhong; Hisanaga, Tamiko; Suderman, Suderman; Koziuk, Janice; Kruczkiewicz, Peter; Nguyen, Hoang Hai; Fisher, Mathew; Lung, Oliver; Berhane, Yohannes
EPI2236761	NP	Canada	2022-Apr-22	EPI_ISL_16023452	A/Skunk/AB/FAV-0416-02/2022	Alberta Agriculture and Forestry, Government of Alberta	Canadian Food Inspection Agency	Alkie, Tamiru; Hicks, Mark; Pybuse, Margo J; Xu, Wanhong; Hisanaga, Tamiko; Suderman, Suderman; Koziuk, Janice; Kruczkiewicz, Peter; Nguyen, Hoang Hai; Fisher, Mathew; Lung, Oliver; Berhane, Yohannes
EPI2236745	NP	Canada	2022-Apr-22	EPI_ISL_16023451	A/Skunk/AB/FAV-0416-01/2022	Alberta Agriculture and Forestry, Government of Alberta	Canadian Food Inspection Agency	Alkie, Tamiru; Hicks, Mark; Pybuse, Margo J; Xu, Wanhong; Hisanaga, Tamiko; Suderman, Suderman; Koziuk, Janice; Kruczkiewicz, Peter; Nguyen, Hoang Hai; Fisher, Mathew; Lung, Oliver; Berhane, Yohannes
EPI2236737	NP	Canada	2022-May-31	EPI_ISL_16023450	A/Skunk/AB/FAV-0835-10/2022	Alberta Agriculture and Forestry, Government of Alberta	Canadian Food Inspection Agency	Alkie, Tamiru; Hicks, Mark; Pybuse, Margo J; Xu, Wanhong; Hisanaga, Tamiko; Suderman, Suderman; Koziuk, Janice; Kruczkiewicz, Peter; Nguyen, Hoang Hai; Fisher, Mathew; Lung, Oliver; Berhane, Yohannes
EPI2236729	NP	Canada	2022-May-04	EPI_ISL_16023449	A/Skunk/AB/FAV-0835-07/2022	Alberta Agriculture and Forestry, Government of Alberta	Canadian Food Inspection Agency	Alkie, Tamiru; Hicks, Mark; Pybuse, Margo J; Xu, Wanhong; Hisanaga, Tamiko; Suderman, Suderman; Koziuk, Janice; Kruczkiewicz, Peter; Nguyen, Hoang Hai; Fisher, Mathew; Lung, Oliver; Berhane, Yohannes
EPI2236721	NP	Canada	2022-May-04	EPI_ISL_16023377	A/Skunk/AB/FAV-0835-05/2022	Alberta Agriculture and Forestry, Government of Alberta	Canadian Food Inspection Agency	Alkie, Tamiru; Hicks, Mark; Pybuse, Margo J; Xu, Wanhong; Hisanaga, Tamiko; Suderman, Suderman; Koziuk, Janice; Kruczkiewicz, Peter; Nguyen, Hoang Hai; Fisher, Mathew; Lung, Oliver; Berhane, Yohannes
EPI2236713	NP	Canada	2022-May-31	EPI_ISL_16023376	A/Skunk/AB/FAV-0835-11/2022	Alberta Agriculture and Forestry, Government of Alberta	Canadian Food Inspection Agency	Alkie, Tamiru; Hicks, Mark; Pybuse, Margo J; Xu, Wanhong; Hisanaga, Tamiko; Suderman, Suderman; Koziuk, Janice; Kruczkiewicz, Peter; Nguyen, Hoang Hai; Fisher, Mathew; Lung, Oliver; Berhane, Yohannes
EPI2236705	NP	Canada	2022-Jul-19	EPI_ISL_16023375	A/Skunk/AB/FAV-0897-03/2022	Alberta Agriculture and Forestry, Government of Alberta	Canadian Food Inspection Agency	Alkie, Tamiru; Hicks, Mark; Pybuse, Margo J; Xu, Wanhong; Hisanaga, Tamiko; Suderman, Suderman; Koziuk, Janice; Kruczkiewicz, Peter; Nguyen, Hoang Hai; Fisher, Mathew; Lung, Oliver; Berhane, Yohannes
EPI2236697	NP	Canada	2022-Jul-19	EPI_ISL_16023374	A/Skunk/AB/FAV-0897-02/2022	Alberta Agriculture and Forestry, Government of Alberta	Canadian Food Inspection Agency	Alkie, Tamiru; Hicks, Mark; Pybuse, Margo J; Xu, Wanhong; Hisanaga, Tamiko; Suderman, Suderman; Koziuk, Janice; Kruczkiewicz, Peter; Nguyen, Hoang Hai; Fisher, Mathew; Lung, Oliver; Berhane, Yohannes
EPI2236689	NP	Canada	2022-Jun-28	EPI_ISL_16023372	A/Skunk/AB/FAV-0897-01/2022	Alberta Agriculture and Forestry, Government of Alberta	Canadian Food Inspection Agency	Alkie, Tamiru; Hicks, Mark; Pybuse, Margo J; Xu, Wanhong; Hisanaga, Tamiko; Suderman, Suderman; Koziuk, Janice; Kruczkiewicz, Peter; Nguyen, Hoang Hai; Fisher, Mathew; Lung, Oliver; Berhane, Yohannes
EPI2150625	NP	Sweden	2022-Jun-29	EPI_ISL_14810369	A/porpoise /Sweden/SVA220712SZ0367/FB002184/O-2022	Swedish Veterinary Agency (SVA)	Swedish Veterinary Agency (SVA)
EPI1958450	NP	Netherlands	2022-Jan-08	EPI_ISL_8799320	A/polecat/Netherlands/22000516-003/2022	Wageningen Bioveterinary Research	Wageningen Bioveterinary Research	Beerens, Nancy; Harders, Frank; Pritz-Verschuren, Sylvia; Roose, Marit; Venema, Sandra; Germeraad, Evelien; Engelsma, Marc; Heutink, Rene
EPI2296210	NP	Belgium	2022-Dec-08	EPI_ISL_16547666	A/Mustela_furo/Belgium/14312-0002/2022	Sciensano - Animal Infectious Diseases	Sciensano, Department of Animal Infectious Diseases	Van Borm, Steven; Roupie, Virginie; Hostyn, Pierre; Lambrecht, Benedicte; Steensels, Mieke
EPI2296198	NP	Belgium	2022-Dec-08	EPI_ISL_16547552	A/Mustela_furo/Belgium/14312-0001/2022	Sciensano - Animal Infectious Diseases	Sciensano, Department of Animal Infectious Diseases	Van Borm, Steven; Roupie, Virginie; Hostyn, Pierre; Lambrecht, Benedicte; Steensels, Mieke
EPI1995125	NP	Slovenia	2022-Jan-05	EPI_ISL_11007536	A/ferret/Slovenia/308MZ_22VIR777-9/2022	Beijing Genomics Institute (BGI)	Istituto Zooprofilattico Sperimentale delle Venezie	Slavec, B.; Ra?nik, J.; Krape?, U.; ?labravec, Z.; A?ko, J.; Cociancich, V.; Paller, T.; Vidrih, ?.; Rojs, O.Z.; Arseniev, S.; Groza, O.; Barbierato, G.; Zecchin, B.; Fusaro, A.; Schivo, A.; Salviato, A.; Palumbo, E.; Giussani, E.; Monne, I.; Terregino, C.
EPI2611369	NP	Poland	2023-Jun-21	EPI_ISL_17956379	A/domestic_cat/Poland/H255-M/2023	National Veterinary Research Institut Poland, PIWet-PIB	National Veterinary Research Institut Poland, PIWet-PIB	Edyta,≈öwiƒôto≈Ñ; Katarzyna,Doma≈Ñska-Blicharz; Aleksandra,Giza; Marta,Pietruk; Karolina,Tarasiuk; Krzysztof,Wyrostek; Natalia, Sty≈õ-Fijo≈Ç
EPI2611362	NP	Poland	2023-Jun-21	EPI_ISL_17956378	A/domestic_cat/Poland/H246-M/2023	National Veterinary Research Institut Poland, PIWet-PIB	National Veterinary Research Institut Poland, PIWet-PIB	Edyta,≈öwiƒôto≈Ñ; Katarzyna,Doma≈Ñska-Blicharz; Aleksandra,Giza; Marta,Pietruk; Karolina,Tarasiuk; Krzysztof,Wyrostek; Natalia, Sty≈õ-Fijo≈Ç
EPI2610691	NP	Poland	2023-Jun-21	EPI_ISL_17949824	A/cat/Poland/Gda1/2023	University of Gdansk	University of Gdansk	Maciej,Grzybek; Tomasz,Lepionka; Krzysztof,Pyrc; Lukasz,Rabalski
EPI2837131	PA	Finland	2023-Sep-20	EPI_ISL_18618768	A/mink/Finland/3079/2023	Finnish Food Authority	Finnish Food Authority	Kauppinen, Ari; Kareinen, Lauri; Tammiranta, Niina; Kantala, Tuija; Fusaro, Alice; Gadd, Tuija
EPI2837123	PA	Finland	2023-Sep-20	EPI_ISL_18618767	A/mink/Finland/3078/2023	Finnish Food Authority	Finnish Food Authority	Kauppinen, Ari; Kareinen, Lauri; Tammiranta, Niina; Kantala, Tuija; Fusaro, Alice; Gadd, Tuija
EPI2837113	PA	Finland	2023-Sep-20	EPI_ISL_18618766	A/mink/Finland/3081/2023	Finnish Food Authority	Finnish Food Authority	Kauppinen, Ari; Kareinen, Lauri; Tammiranta, Niina; Kantala, Tuija; Fusaro, Alice; Gadd, Tuija
EPI2837103	PA	Finland	2023-Sep-20	EPI_ISL_18618701	A/mink/Finland/3076/2023	Finnish Food Authority	Finnish Food Authority	Kauppinen, Ari; Kareinen, Lauri; Tammiranta, Niina; Kantala, Tuija; Fusaro, Alice; Gadd, Tuija
EPI2760290	PA	Finland	2023-Jul-17	EPI_ISL_18321746	A/raccoon_dog/Finland/552_23VIR6928-5/2023	Finnish Food Authority	Istituto Zooprofilattico Sperimentale Delle Venezie	Gadd, T.; Tammiranta, N; Kantala, K.; Nokireki, T.; Pastori, A.; Zecchin, B.; Fusaro, A.; Schivo, A.; Salviato, A.; Palumbo, E.; Giussani, E.; Monne, I.; Terregino, C.
EPI2755518	PA	Finland	2023-Aug-05	EPI_ISL_18292966	A/mink/Finland/710/2023	Finnish Food Authority	Finnish Food Authority	Kauppinen, Ari; Kareinen, Lauri; Tammiranta, Niina; Kantala, Tuija; Fusaro, Alice; Giussani, Edoardo; Gadd, Tuija
EPI2755416	PA	Finland	2023-Jul-03	EPI_ISL_18292952	A/mink/Finland/506/2023	Finnish Food Authority	Finnish Food Authority	Kauppinen, Ari; Kareinen, Lauri; Tammiranta, Niina; Kantala, Tuija; Fusaro, Alice; Galiano, Monica; Ikonen, Niina; Lindh, Erika; Gadd, Tuija
EPI2536811	PA	Netherlands	2022-Jan-16	EPI_ISL_17580930	A/Stone Marten/Netherlands/1/2022	Erasmus Medical Center	Erasmus Medical Center	Vuong,O;Thewessen, S;Bellido-Martin,A.B; Chestakova, I; Sikkema, R;Fouchier, R.A.M.
EPI2513414	PA	Canada	2022-Dec-26	EPI_ISL_17494319	A/American crow/PEI/FAV-0019-01/2022	Atlantic Veterinary College, University of Prince Edward Island	Canadian Food Inspection Agency	Parma, L; Hisanaga, T; Xu, W; Alkie, T; Fisher, M; Lung, O; Yason, C; Jones, M; Berhane, Y
EPI2197228	PA	Finland	2021-Sep-01	EPI_ISL_15518270	A/otter/Finland/2860_21VIR9619-5/2021	Finnish Food Authority	Istituto Zooprofilattico Sperimentale Delle Venezie	Tammiranta, N.;Kantala, T.;Laamanen, I.;Gadd, T.;Zecchin, B.;Fusaro, A.;Schivo, A.;Salviato, A.;Palumbo, E.;Milani, A.;Giussani, E.;Pastori, A.;Monne, I.;Terregino, C.
EPI2197220	PA	Finland	2022-Feb-01	EPI_ISL_15518269	A/lynx/Finland/Vi209-22_22VIR3127-2/2022	Finnish Food Authority	Istituto Zooprofilattico Sperimentale Delle Venezie	Tammiranta, N.;Kantala, T.;Laamanen, I.;Gadd, T.;Zecchin, B.;Fusaro, A.;Schivo, A.;Salviato, A.;Palumbo, E.;Milani, A.;Giussani, E.;Pastori, A.;Monne, I.;Terregino, C.
EPI1987254	PA	Netherlands	2022-Feb-13	EPI_ISL_10220432	A/badger/Netherlands/22003078-004/2022	Wageningen Bioveterinary Research	Wageningen Bioveterinary Research	Beerens, Nancy; Harders, Frank; Pritz-Verschuren, Sylvia; Roose, Marit; Venema, Sandra; Germeraad, Evelien; Engelsma, Marc; Heutink, Rene
EPI1987230	PA	Netherlands	2022-Feb-09	EPI_ISL_10220429	A/polecat/Netherlands/22002792-005/2022	Wageningen Bioveterinary Research	Wageningen Bioveterinary Research	Beerens, Nancy; Harders, Frank; Pritz-Verschuren, Sylvia; Roose, Marit; Venema, Sandra; Germeraad, Evelien; Engelsma, Marc; Heutink, Rene
EPI1981000	PA	Netherlands	2022-Jan-24	EPI_ISL_9616266	A/polecat/Netherlands/22002047-001/2022	Wageningen Bioveterinary Research	Wageningen Bioveterinary Research	Beerens, Nancy; Harders, Frank; Pritz-Verschuren, Sylvia; Roose, Marit; Venema, Sandra; Germeraad, Evelien; Engelsma, Marc; Heutink, Rene
EPI2780160	PA	Korea, Republic of	2023-Jul-04	EPI_ISL_18102701	A/feline/South Korea/SNU-02/2023			K,Lee; M,Yeom; T,Vu; Q,Do; W,NA; M,Lee; D,Jeong; D,Cheon; D,Song
EPI2780153	PA	Korea, Republic of	2023-Jul-04	EPI_ISL_18102700	A/feline/South Korea/SNU-01/2023			K,Lee; M,Yeom; T,Vu; Q,Do; W,NA; M,Lee; D,Jeong; D,Cheon; D,Song
EPI2652226	PA	Poland	2023-Jun-17	EPI_ISL_18033408	A/caracal/Poland/H303-P/2023	National Veterinary Research Institut Poland, PIWet-PIB	National Veterinary Research Institut Poland, PIWet-PIB	Swieton,Edyta;Tarasiuk,Karolina;Wyrostek,Krzysztof;Stys-Fijol,Natalia;Domanska-Blicharz,Katarzyna
EPI2597243	PA	Peru	2023-Feb-08	EPI_ISL_17805999	A/lion/Peru/AIS0554/2023			Cruz,C.D., Conza,L.B., Espejo,V., Troncos,G., Perez,D.R., Marcelo,O.L., Schilling,M.; Tinoco,Y.
EPI3260244	PA	United States	2024-Jan-30	EPI_ISL_19094507	A/mountain lion/Montana/24_005908-001/2024	United States Department of Agriculture, Agricultural Research Service, National Animal Disease Center	United States Department of Agriculture, Agricultural Research Service, National Animal Disease Center	T.,Nguyen; C.,Hutter; A.,Markin; M.,Thomas; K.,Lantz; M.L.,Killian; G.M.,Janzen; S.,Vijendran; S.,Wagle; B.,Inderski; D.R.,Magstadt; G.,Li; D.G.,Diel; E.A.,Frye; K.M.,Dimitrov; A.K.,Swinford; A.C.,Thompson; K.R.,Snevik; D.L.,Suarez; E.,Spackman; S.M.,Lakin; S.,C; K.R.,Johnson; A.L.,Baker; Robbe-S.,Austerman; M.K.,Torchetti; Anderson,T.K.
EPI3260236	PA	United States	2024-Apr-01	EPI_ISL_19094506	A/mountain lion/Montana/24_010315-001/2024	United States Department of Agriculture, Agricultural Research Service, National Animal Disease Center	United States Department of Agriculture, Agricultural Research Service, National Animal Disease Center	T.,Nguyen; C.,Hutter; A.,Markin; M.,Thomas; K.,Lantz; M.L.,Killian; G.M.,Janzen; S.,Vijendran; S.,Wagle; B.,Inderski; D.R.,Magstadt; G.,Li; D.G.,Diel; E.A.,Frye; K.M.,Dimitrov; A.K.,Swinford; A.C.,Thompson; K.R.,Snevik; D.L.,Suarez; E.,Spackman; S.M.,Lakin; S.,C; K.R.,Johnson; A.L.,Baker; Robbe-S.,Austerman; M.K.,Torchetti; Anderson,T.K.
EPI3260219	PA	United States	2024-Mar-11	EPI_ISL_19094504	A/skunk/Montana/24_007939-001/2024	United States Department of Agriculture, Agricultural Research Service, National Animal Disease Center	United States Department of Agriculture, Agricultural Research Service, National Animal Disease Center	T.,Nguyen; C.,Hutter; A.,Markin; M.,Thomas; K.,Lantz; M.L.,Killian; G.M.,Janzen; S.,Vijendran; S.,Wagle; B.,Inderski; D.R.,Magstadt; G.,Li; D.G.,Diel; E.A.,Frye; K.M.,Dimitrov; A.K.,Swinford; A.C.,Thompson; K.R.,Snevik; D.L.,Suarez; E.,Spackman; S.M.,Lakin; S.,C; K.R.,Johnson; A.L.,Baker; Robbe-S.,Austerman; M.K.,Torchetti; Anderson,T.K.
EPI3260195	PA	United States	2024-Feb-23	EPI_ISL_19094501	A/skunk/Washington/24_005959-001/2024	United States Department of Agriculture, Agricultural Research Service, National Animal Disease Center	United States Department of Agriculture, Agricultural Research Service, National Animal Disease Center	T.,Nguyen; C.,Hutter; A.,Markin; M.,Thomas; K.,Lantz; M.L.,Killian; G.M.,Janzen; S.,Vijendran; S.,Wagle; B.,Inderski; D.R.,Magstadt; G.,Li; D.G.,Diel; E.A.,Frye; K.M.,Dimitrov; A.K.,Swinford; A.C.,Thompson; K.R.,Snevik; D.L.,Suarez; E.,Spackman; S.M.,Lakin; S.,C; K.R.,Johnson; A.L.,Baker; Robbe-S.,Austerman; M.K.,Torchetti; Anderson,T.K.
EPI3260187	PA	United States	2024-Feb-23	EPI_ISL_19094500	A/skunk/Washington/24_005959-002/2024	United States Department of Agriculture, Agricultural Research Service, National Animal Disease Center	United States Department of Agriculture, Agricultural Research Service, National Animal Disease Center	T.,Nguyen; C.,Hutter; A.,Markin; M.,Thomas; K.,Lantz; M.L.,Killian; G.M.,Janzen; S.,Vijendran; S.,Wagle; B.,Inderski; D.R.,Magstadt; G.,Li; D.G.,Diel; E.A.,Frye; K.M.,Dimitrov; A.K.,Swinford; A.C.,Thompson; K.R.,Snevik; D.L.,Suarez; E.,Spackman; S.M.,Lakin; S.,C; K.R.,Johnson; A.L.,Baker; Robbe-S.,Austerman; M.K.,Torchetti; Anderson,T.K.
EPI3260179	PA	United States	2024-Feb-23	EPI_ISL_19094499	A/skunk/Washington/24_005959-003/2024	United States Department of Agriculture, Agricultural Research Service, National Animal Disease Center	United States Department of Agriculture, Agricultural Research Service, National Animal Disease Center	T.,Nguyen; C.,Hutter; A.,Markin; M.,Thomas; K.,Lantz; M.L.,Killian; G.M.,Janzen; S.,Vijendran; S.,Wagle; B.,Inderski; D.R.,Magstadt; G.,Li; D.G.,Diel; E.A.,Frye; K.M.,Dimitrov; A.K.,Swinford; A.C.,Thompson; K.R.,Snevik; D.L.,Suarez; E.,Spackman; S.M.,Lakin; S.,C; K.R.,Johnson; A.L.,Baker; Robbe-S.,Austerman; M.K.,Torchetti; Anderson,T.K.
EPI3259736	PA	United States	2024-Mar-19	EPI_ISL_19094443	A/feline/Montana/24-009038-001/2024	National Veterinary Services Laboratories - USDA	National Veterinary Services Laboratories - USDA	Aufderhar,Matthew;Franzen,Kerrie;Killian,Mary;Lantz,Kristina;Stuber,Tod;Hicks,Jessica;Norris,Cameron
EPI3158795	PA	United States	2024-Feb-23	EPI_ISL_19014400	A/skunk/New Mexico/24-006483-001/2024	National Veterinary Services Laboratories - USDA	National Veterinary Services Laboratories - USDA	Aufderhar,Matthew;Franzen,Kerrie;Love,Emily;Killian,Mary;Lantz,Kristina;Stuber,Tod;Hicks,Jessica;Norris,Cameron
EPI2906700	PA	France	2022-Nov-01	EPI_ISL_18750109	A/tibetan blue bear/France/CHUT-0007R2/2022	Centre Hospitalier Universitaire de Toulouse	Centre Hospitalier Universitaire de Toulouse	Bessiere,P., Gaide,N., Crispo,M., Dirat,M., Croville,G., Le Loc'h,G.; Guerin,J.-L.
EPI2895491	PA	United States	2023-Aug-19	EPI_ISL_18737559	A/harbor seal/Washington/23-025744-002/2023	National Veterinary Services Laboratories - USDA	National Veterinary Services Laboratories - USDA	Franzen,Kerrie;Love,Emily;Ozella,Mikaela;Killian,Mary;Lantz,Kristina;Stuber,Tod;Hicks,Jessica;Norris,Cameron
EPI2895483	PA	United States	2023-Aug-19	EPI_ISL_18737558	A/harbor seal/Washington/23-025744-001/2023	National Veterinary Services Laboratories - USDA	National Veterinary Services Laboratories - USDA	Franzen,Kerrie;Love,Emily;Ozella,Mikaela;Killian,Mary;Lantz,Kristina;Stuber,Tod;Hicks,Jessica;Norris,Cameron
EPI2895019	PA	United States	2023-Aug-13	EPI_ISL_18731638	A/harbor seal/Washington/23-027069-002/2023	National Veterinary Services Laboratories - USDA	National Veterinary Services Laboratories - USDA	Franzen,Kerrie;Love,Emily;Ozella,Mikaela;Killian,Mary;Lantz,Kristina;Stuber,Tod;Hicks,Jessica;Norris,Cameron
EPI2894995	PA	United States	2023-Aug-25	EPI_ISL_18731622	A/harbor seal/Washington/23-025991-001/2023	National Veterinary Services Laboratories - USDA	National Veterinary Services Laboratories - USDA	Franzen,Kerrie;Love,Emily;Ozella,Mikaela;Killian,Mary;Lantz,Kristina;Stuber,Tod;Hicks,Jessica;Norris,Cameron
EPI2894987	PA	United States	2023-Aug-29	EPI_ISL_18731621	A/harbor seal/Washington/23-026504-002/2023	National Veterinary Services Laboratories - USDA	National Veterinary Services Laboratories - USDA	Franzen,Kerrie;Love,Emily;Ozella,Mikaela;Killian,Mary;Lantz,Kristina;Stuber,Tod;Hicks,Jessica;Norris,Cameron
EPI2894979	PA	United States	2023-Aug-29	EPI_ISL_18731620	A/harbor seal/Washington/23-026504-001/2023	National Veterinary Services Laboratories - USDA	National Veterinary Services Laboratories - USDA	Franzen,Kerrie;Love,Emily;Ozella,Mikaela;Killian,Mary;Lantz,Kristina;Stuber,Tod;Hicks,Jessica;Norris,Cameron
EPI2856643	PA	Canada	2023-Apr-20	EPI_ISL_18665592	A/Striped_Skunk/BC/AIVPHL-1083/2023	B.C. Centre for Disease Control	Public Health Agency of Canada	Himsworth, Chelsea; Prystajecky,Natalie; Tyson,John; Jassem,Agatha; Kuchinski,Kevin; Coombe, Michelle; Lee,Tracy; Azana,Rob; Fung,Janet; Chan,Michael; Cheung,Branco; Caleta,Jessica; Tsang,Frankie; Yang,Kevin; Russell,Shannon; Zlosnik,James; Hoang,Linda
EPI2856620	PA	Canada	2023-Apr-20	EPI_ISL_18665588	A/Striped_Skunk/BC/AIVPHL-1082/2023	B.C. Centre for Disease Control	Public Health Agency of Canada	Himsworth, Chelsea; Prystajecky,Natalie; Tyson,John; Jassem,Agatha; Kuchinski,Kevin; Coombe, Michelle; Lee,Tracy; Azana,Rob; Fung,Janet; Chan,Michael; Cheung,Branco; Caleta,Jessica; Tsang,Frankie; Yang,Kevin; Russell,Shannon; Zlosnik,James; Hoang,Linda
EPI2856596	PA	Canada	2023-Apr-20	EPI_ISL_18665585	A/Striped_Skunk/BC/AIVPHL-1080/2023	B.C. Centre for Disease Control	Public Health Agency of Canada	Himsworth, Chelsea; Prystajecky,Natalie; Tyson,John; Jassem,Agatha; Kuchinski,Kevin; Coombe, Michelle; Lee,Tracy; Azana,Rob; Fung,Janet; Chan,Michael; Cheung,Branco; Caleta,Jessica; Tsang,Frankie; Yang,Kevin; Russell,Shannon; Zlosnik,James; Hoang,Linda
EPI2856221	PA	Canada	2023-Mar-09	EPI_ISL_18665535	A/Striped_Skunk/BC/AIVPHL-977/2023	B.C. Centre for Disease Control	Public Health Agency of Canada	Himsworth, Chelsea; Prystajecky,Natalie; Tyson,John; Jassem,Agatha; Kuchinski,Kevin; Coombe, Michelle; Lee,Tracy; Azana,Rob; Fung,Janet; Chan,Michael; Cheung,Branco; Caleta,Jessica; Tsang,Frankie; Yang,Kevin; Russell,Shannon; Zlosnik,James; Hoang,Linda
EPI2856197	PA	Canada	2023-Mar-09	EPI_ISL_18665532	A/Striped_Skunk/BC/AIVPHL-976/2023	B.C. Centre for Disease Control	Public Health Agency of Canada	Himsworth, Chelsea; Prystajecky,Natalie; Tyson,John; Jassem,Agatha; Kuchinski,Kevin; Coombe, Michelle; Lee,Tracy; Azana,Rob; Fung,Janet; Chan,Michael; Cheung,Branco; Caleta,Jessica; Tsang,Frankie; Yang,Kevin; Russell,Shannon; Zlosnik,James; Hoang,Linda
EPI2816119	PA	Denmark	2023-Apr-29	EPI_ISL_18594303	A_red_fox_Denmark_08303-1.01_2023-04-29	Statens Serumm Institute	Statens Serum Institute	Hjulsager,C;Liang,Y
EPI2512578	PA	Canada	2022-Jun-14	EPI_ISL_17478645	A/Black Bear/QC/FAV-0902/2022	Laboratoire de sant√© animale Minist√®re de l'Agriculture, des P√™cheries et de l'A	Canadian Food Inspection Agency	Koziuk, J; Hisanaga, T; Xu, W; Alkie, T; Lung, O; Fisher, M; Nadeau, M.S; Lair, S; Berhane, Y
EPI2512509	PA	Canada	2022-Jun-24	EPI_ISL_17478584	A/Black Bear/QC/FAV-0935/2022	Laboratoire de sant√© animale Minist√®re de l'Agriculture, des P√™cheries et de l'A	Canadian Food Inspection Agency	Koziuk, J; Hisanaga, T; Xu, W; Alkie, T; Lung, O; Fisher, M; Nadeau, M.S; Lair, S; Berhane, Y
EPI2509903	PA	United Kingdom	2022-Jun-19	EPI_ISL_17465835	A/harbour_seal/Scotland/054948/2022	Animal and Plant Health Agency (APHA)	Animal and Plant Health Agency (APHA)
EPI2509895	PA	United Kingdom	2023-Feb-20	EPI_ISL_17465834	A/common_dolphin/England/040499/2023	Animal and Plant Health Agency (APHA)	Animal and Plant Health Agency (APHA)
EPI2509887	PA	United Kingdom	2023-Feb-20	EPI_ISL_17465833	A/common_dolphin/Wales/040498/2023	Animal and Plant Health Agency (APHA)	Animal and Plant Health Agency (APHA)
EPI2509879	PA	United Kingdom	2023-Feb-06	EPI_ISL_17465832	A/harbour_porpoise/England/040497/2023	Animal and Plant Health Agency (APHA)	Animal and Plant Health Agency (APHA)
EPI2507008	PA	United States	2023-Jan-27	EPI_ISL_17424646	A/striped skunk/Kansas/W23-094/2023	St. Jude Center of Excellence for Influenza Research and Response - CEIRR Influenza Data Processing and Communication Center	St. Jude Center of Excellence for Influenza Research and Response - CEIRR Influenza Data Processing and Communication Center	Poulson,R., Stallknecht,D., Rubrum,A., Jeevan,T., Walker,D. and Webby,R.
EPI2506856	PA	United States	2022-Jul-07	EPI_ISL_17424627	A/harbor seal/Maine/MME-185-ns/2022			Fauquier,D.; Doughty,L.A.; Rubrum,A.; Jeevan,T.; Walker,D.; Webby,R.
EPI2506848	PA	United States	2022-Jun-24	EPI_ISL_17424626	A/harbor seal/Maine/MME-117-ns/2022			Fauquier,D.; Doughty,L.A.; Rubrum,A.; Jeevan,T.; Walker,D.; Webby,R.
EPI2506840	PA	United States	2022-Jul-02	EPI_ISL_17424625	A/harbor seal/Maine/MME-150-L/2022			Fauquier,D.; Doughty,L.A.; Rubrum,A.; Jeevan,T.; Walker,D.; Webby,R.
EPI2506832	PA	United States	2022-Jul-07	EPI_ISL_17424624	A/harbor seal/Maine/MME-185-L/2022	St. Jude Center of Excellence for Influenza Research and Response - CEIRR Influenza Data Processing and Communication Center	St. Jude Center of Excellence for Influenza Research and Response - CEIRR Influenza Data Processing and Communication Center	Fauquier,D., Doughty,L.A., Rubrum,A., Jeevan,T., Walker,D. and Webby,R.
EPI2506824	PA	United States	2022-Jul-02	EPI_ISL_17424623	A/harbor seal/Maine/MME-150-ns/2022			Fauquier,D.; Doughty,L.A.; Rubrum,A.; Jeevan,T.; Walker,D.; Webby,R.
EPI2506859	PA	United States	2022-Jul-02	EPI_ISL_17424622	A/harbor seal/Maine/MME-147-L/2022	St. Jude Center of Excellence for Influenza Research and Response - CEIRR Influenza Data Processing and Communication Center	St. Jude Center of Excellence for Influenza Research and Response - CEIRR Influenza Data Processing and Communication Center	Fauquier,D., Doughty,L.A., Rubrum,A., Jeevan,T., Walker,D. and Webby,R.
EPI2473780	PA	United States	2022-Jul-22	EPI_ISL_17260689	A/skunk/Idaho/22-023547-001/2022	National Veterinary Services Laboratories - USDA	National Veterinary Services Laboratories - USDA	Chinh,Thanh;Franzen,Kerrie;Love,Emily;Killian,Mary;Koster,Leo;Lantz,Kristina;Stuber,Tod;Hicks,Jessica;Norris,Cameron
EPI2473772	PA	United States	2022-Jul-06	EPI_ISL_17260688	A/raccoon/Michigan/22-021733-010/2022	National Veterinary Services Laboratories - USDA	National Veterinary Services Laboratories - USDA	Chinh,Thanh;Franzen,Kerrie;Love,Emily;Killian,Mary;Koster,Leo;Lantz,Kristina;Stuber,Tod;Hicks,Jessica;Norris,Cameron
EPI2473695	PA	United States	2022-Apr-14	EPI_ISL_17260683	A/fisher/Wisconsin/22-019946-001/2022	National Veterinary Services Laboratories - USDA	National Veterinary Services Laboratories - USDA	Chinh,Thanh;Franzen,Kerrie;Love,Emily;Killian,Mary;Koster,Leo;Lantz,Kristina;Stuber,Tod;Hicks,Jessica;Norris,Cameron
EPI2473681	PA	United States	2022-Jun-07	EPI_ISL_17260682	A/skunk/Washington/22-019274-004/2022	National Veterinary Services Laboratories - USDA	National Veterinary Services Laboratories - USDA	Chinh,Thanh;Franzen,Kerrie;Love,Emily;Killian,Mary;Koster,Leo;Lantz,Kristina;Stuber,Tod;Hicks,Jessica;Norris,Cameron
EPI2473654	PA	United States	2022-Jun-06	EPI_ISL_17260680	A/skunk/Idaho/22-018976-004/2022	National Veterinary Services Laboratories - USDA	National Veterinary Services Laboratories - USDA	Chinh,Thanh;Franzen,Kerrie;Love,Emily;Killian,Mary;Koster,Leo;Lantz,Kristina;Stuber,Tod;Hicks,Jessica;Norris,Cameron
EPI2473584	PA	United States	2022-May-03	EPI_ISL_17260675	A/coyote/Michigan/22-017507-005/2022	National Veterinary Services Laboratories - USDA	National Veterinary Services Laboratories - USDA	Chinh,Thanh;Franzen,Kerrie;Love,Emily;Killian,Mary;Koster,Leo;Lantz,Kristina;Stuber,Tod;Hicks,Jessica;Norris,Cameron
EPI2469497	PA	Belgium	2023-Mar-02	EPI_ISL_17246921	A/Mustela_putorius/Belgium/01922_0001/2023	Sciensano - Animal Infectious Diseases	Sciensano, Department of Animal Infectious Diseases	Van Borm, Steven; Roupie, Virginie; Hostyn, Pierre; Mathijs, Elisabeth; Lambrecht, Benedicte; Steensels, Mieke
EPI2274965	PA	Canada	2022-May-30	EPI_ISL_16367971	A/Striped Skunk/SK/FAV-0824-01/2022	Western College of Veterinary Medicine, University of Saskatchewan	Canadian Food Inspection Agency
EPI2260730	PA	United States	2022-Jan-01	EPI_ISL_16271848	A/black bear/Alaska/22-036396-001/2022	National Veterinary Services Laboratories - USDA	National Veterinary Services Laboratories - USDA	Chinh,Thanh;Love, Emily;Franzen,Kerrie;Killian,Mary;Koster,Leo;Lantz,Kristina;Stuber,Tod;Hicks,Jessica
EPI2260626	PA	United States	2022-Nov-04	EPI_ISL_16271835	A/striped skunk/Idaho/22-037165-002/2022	National Veterinary Services Laboratories - USDA	National Veterinary Services Laboratories - USDA	Chinh,Thanh;Love, Emily;Franzen,Kerrie;Killian,Mary;Koster,Leo;Lantz,Kristina;Stuber,Tod;Hicks,Jessica
EPI2257435	PA	United States	2022-Mar-30	EPI_ISL_16212269	A/bottlenose dolphin/Florida/UFTt2203/2022			Murawski,A.; Allison,A.; Ossiboff,R.; Fabrizio,T.; Jeevan,T.; Mukherjee,N.; Killian,M.L.; Torchetti,M.; Walsh,M.; Webby,R.
EPI2235583	PA	Canada	2022-May-18	EPI_ISL_16003268	A/Skunk/MB/FAV-470/2022	Manitoba Agriculture	Canadian Food Inspection Agency	Alkie, Tamiru; Cox, Sherri; Pople, Neil; Xu, Wanhong; Hisanaga, Tamiko; Suderman, Suderman; Koziuk, Janice; Kruczkiewicz, Peter; Nguyen, Hoang Hai; Fisher, Mathew; Lung, Oliver; Berhane, Yohannes
EPI2182139	PA	United States	2022-Mar-30	EPI_ISL_15078255	A/dolphin/Florida/22-025319-002/2022	National Veterinary Services Laboratories - USDA	National Veterinary Services Laboratories - USDA	Chinh,Thanh;Love, Emily;Franzen,Kerrie;Killian,Mary;Koster,Leo;Lantz,Kristina;Stuber,Tod;Hicks,Jessica
EPI2182131	PA	United States	2022-Jun-07	EPI_ISL_15078254	A/skunk/Washington/22-019274-001/2022	National Veterinary Services Laboratories - USDA	National Veterinary Services Laboratories - USDA	Chinh,Thanh;Love, Emily;Franzen,Kerrie;Killian,Mary;Koster,Leo;Lantz,Kristina;Stuber,Tod;Hicks,Jessica
EPI2182115	PA	United States	2022-Jun-08	EPI_ISL_15078252	A/raccoon/Washington/22-018406-002/2022	National Veterinary Services Laboratories - USDA	National Veterinary Services Laboratories - USDA	Chinh,Thanh;Love, Emily;Franzen,Kerrie;Killian,Mary;Koster,Leo;Lantz,Kristina;Stuber,Tod;Hicks,Jessica
EPI2182099	PA	United States	2022-May-25	EPI_ISL_15078250	A/Virginia opossum/Iowa/22-016780-001/2022	National Veterinary Services Laboratories - USDA	National Veterinary Services Laboratories - USDA	Chinh,Thanh;Love, Emily;Franzen,Kerrie;Killian,Mary;Koster,Leo;Lantz,Kristina;Stuber,Tod;Hicks,Jessica
EPI2182083	PA	United States	2022-May-24	EPI_ISL_15078248	A/bobcat/Wisconsin/22-016051-001/2022	National Veterinary Services Laboratories - USDA	National Veterinary Services Laboratories - USDA	Chinh,Thanh;Love, Emily;Franzen,Kerrie;Killian,Mary;Koster,Leo;Lantz,Kristina;Stuber,Tod;Hicks,Jessica
EPI2181751	PA	United States	2022-Mar-30	EPI_ISL_15069397	A/bottlenose dolphin/Florida/UFTt2203/2022	University of Florida, College of Veterinary Medicine	St. Jude Children's Research Hospital	Murawski, Allison; Allison, Andrew; Ossiboff, Robert; Fabrizio, Thomas; Jeevan, Trushar; Killian, Mary Lea; Torchetti, Mia; Walsh, Michael; Webby, Richard
EPI2158644	PA	United Kingdom	2022-Jan-01	EPI_ISL_14864642	A/otter/Scotland/M100366/2022	Animal and Plant Health Agency (APHA)	Animal and Plant Health Agency (APHA)
EPI2158636	PA	United Kingdom	2022-Jan-01	EPI_ISL_14864641	A/otter/Scotland/M100839/2022	Animal and Plant Health Agency (APHA)	Animal and Plant Health Agency (APHA)
EPI2109942	PA	Japan	2022-Apr-01	EPI_ISL_14070455	A/tanuki/Hokkaido/1/2022	Graduate School of Veterinary Medicine, Hokkaido University	Graduate School of Veterinary Medicine, Hokkaido University	Yoshihiro, Sakoda; Takahiro, Hiono; Norikazu, Isoda
EPI2455327	PA	Germany	2023-Feb-27	EPI_ISL_17167249	A/grey seal/Germany-SH/AI01973/2023	Landeslabor Schleswig-Holstein	Friedrich-Loeffler-Institut
EPI2398407	PA	United Kingdom	2022-Jul-25	EPI_ISL_16904554	A/Harbour_Seal/Scotland/162925/2022	Animal and Plant Health Agency (APHA)	Animal and Plant Health Agency (APHA)
EPI2398399	PA	United Kingdom	2022-Mar-12	EPI_ISL_16904553	A/Harbour_Seal/Scotland/162919/2022	Animal and Plant Health Agency (APHA)	Animal and Plant Health Agency (APHA)
EPI2310440	PA	United States	2022-Jul-15	EPI_ISL_16632542	A/harbor seal/Maine/22-025072-002/2022	Cummings School of Veterinary Medicine at Tufts University	Cummings School of Veterinary Medicine at Tufts University	Chinh,Thanh; Franzen,Kerrie; Love,Emily; Killian,Mary; Lantz,Kristina; Hicks,Jessica; Norris, Cameron; Stuber,Tod; Sawatzki, Kaitlin; Puryear, Wendy; Foss, Alexa; Doughty,Linda; Runstadler, Jonathan
EPI2310432	PA	United States	2022-Jul-09	EPI_ISL_16632541	A/harbor seal/Maine/22-022528-008/2022	Cummings School of Veterinary Medicine at Tufts University	Cummings School of Veterinary Medicine at Tufts University	Chinh,Thanh; Franzen,Kerrie; Love,Emily; Killian,Mary; Lantz,Kristina; Hicks,Jessica; Norris, Cameron; Stuber,Tod; Sawatzki, Kaitlin; Puryear, Wendy; Foss, Alexa; Doughty,Linda; Runstadler, Jonathan
EPI2310424	PA	United States	2022-Jul-09	EPI_ISL_16632540	A/harbor seal/Maine/22-022528-006/2022	Cummings School of Veterinary Medicine at Tufts University	Cummings School of Veterinary Medicine at Tufts University	Chinh,Thanh; Franzen,Kerrie; Love,Emily; Killian,Mary; Lantz,Kristina; Hicks,Jessica; Norris, Cameron; Stuber,Tod; Sawatzki, Kaitlin; Puryear, Wendy; Foss, Alexa; Doughty,Linda; Runstadler, Jonathan
EPI2310416	PA	United States	2022-Jul-08	EPI_ISL_16632539	A/harbor seal/Maine/22-022528-003/2022	Cummings School of Veterinary Medicine at Tufts University	Cummings School of Veterinary Medicine at Tufts University	Chinh,Thanh; Franzen,Kerrie; Love,Emily; Killian,Mary; Lantz,Kristina; Hicks,Jessica; Norris, Cameron; Stuber,Tod; Sawatzki, Kaitlin; Puryear, Wendy; Foss, Alexa; Doughty,Linda; Runstadler, Jonathan
EPI2110521	PA	United States	2022-Jun-29	EPI_ISL_14098924	A/harbor seal/Maine/22-020983-007/2022	National Veterinary Services Laboratories - USDA	National Veterinary Services Laboratories - USDA	Chinh,Thanh;Franzen,Kerrie;Love, Emily;Killian,Mary;Koster,Leo;Lantz,Kristina;Torchetti,Mia;Stuber,Tod;Hicks,Jessica
EPI2110513	PA	United States	2022-Jun-29	EPI_ISL_14098923	A/harbor seal/Maine/22-020983-006/2022	National Veterinary Services Laboratories - USDA	National Veterinary Services Laboratories - USDA	Chinh,Thanh;Franzen,Kerrie;Love, Emily;Killian,Mary;Koster,Leo;Lantz,Kristina;Torchetti,Mia;Stuber,Tod;Hicks,Jessica
EPI2110505	PA	United States	2022-Jun-29	EPI_ISL_14098922	A/grey seal/Maine/22-020983-003/2022	National Veterinary Services Laboratories - USDA	National Veterinary Services Laboratories - USDA	Chinh,Thanh;Franzen,Kerrie;Love, Emily;Killian,Mary;Koster,Leo;Lantz,Kristina;Torchetti,Mia;Stuber,Tod;Hicks,Jessica
EPI2110497	PA	United States	2022-Jun-29	EPI_ISL_14098921	A/harbor seal/Maine/22-020983-002/2022	National Veterinary Services Laboratories - USDA	National Veterinary Services Laboratories - USDA	Chinh,Thanh;Franzen,Kerrie;Love, Emily;Killian,Mary;Koster,Leo;Lantz,Kristina;Torchetti,Mia;Stuber,Tod;Hicks,Jessica
EPI2110489	PA	United States	2022-Jun-29	EPI_ISL_14098920	A/harbor seal/Maine/22-020983-001/2022	National Veterinary Services Laboratories - USDA	National Veterinary Services Laboratories - USDA	Chinh,Thanh;Franzen,Kerrie;Love, Emily;Killian,Mary;Koster,Leo;Lantz,Kristina;Torchetti,Mia;Stuber,Tod;Hicks,Jessica
EPI2110481	PA	United States	2022-Jun-27	EPI_ISL_14098919	A/harbor seal/Maine/22-020455-005/2022	National Veterinary Services Laboratories - USDA	National Veterinary Services Laboratories - USDA	Chinh,Thanh;Franzen,Kerrie;Love, Emily;Killian,Mary;Koster,Leo;Lantz,Kristina;Torchetti,Mia;Stuber,Tod;Hicks,Jessica
EPI2110473	PA	United States	2022-Jun-26	EPI_ISL_14098918	A/harbor seal/Maine/22-020455-004/2022	National Veterinary Services Laboratories - USDA	National Veterinary Services Laboratories - USDA	Chinh,Thanh;Franzen,Kerrie;Love, Emily;Killian,Mary;Koster,Leo;Lantz,Kristina;Torchetti,Mia;Stuber,Tod;Hicks,Jessica
EPI2110465	PA	United States	2022-Jun-22	EPI_ISL_14098917	A/harbor seal/Maine/22-020455-003/2022	National Veterinary Services Laboratories - USDA	National Veterinary Services Laboratories - USDA	Chinh,Thanh;Franzen,Kerrie;Love, Emily;Killian,Mary;Koster,Leo;Lantz,Kristina;Torchetti,Mia;Stuber,Tod;Hicks,Jessica
EPI2110457	PA	United States	2022-Jun-24	EPI_ISL_14098916	A/harbor seal/Maine/22-020455-002/2022	National Veterinary Services Laboratories - USDA	National Veterinary Services Laboratories - USDA	Chinh,Thanh;Franzen,Kerrie;Love, Emily;Killian,Mary;Koster,Leo;Lantz,Kristina;Torchetti,Mia;Stuber,Tod;Hicks,Jessica
EPI2110450	PA	United States	2022-Jun-24	EPI_ISL_14098915	A/harbor seal/Maine/22-020455-001/2022	National Veterinary Services Laboratories - USDA	National Veterinary Services Laboratories - USDA	Chinh,Thanh;Franzen,Kerrie;Love, Emily;Killian,Mary;Koster,Leo;Lantz,Kristina;Torchetti,Mia;Stuber,Tod;Hicks,Jessica
EPI2641357	PA	Finland	2023-Jul-10	EPI_ISL_18011099	A/mink/Finland/512-23/2023	Finnish Food Authority	Finnish Institute for Health and Welfare, THL	Tuija,Kantala; Alice,Fusaro; Tuija,Gadd; Monica,Galiano; Niina,Ikonen; Lauri,Kareinen; Ari,Kauppinen; Erika,Lindh
EPI2291506	PA	Spain	2022-Oct-26	EPI_ISL_16507095	A/mink/Spain/22VIR12774-13_3869-2/2022	Istituto Zooprofilattico Sperimentale delle Venezie, EU/OIE/Reference Laboratory and FAO Reference Centre for AI and ND	Istituto Zooprofilattico Sperimentale Delle Venezie	Ruano,M.J.; Rocha,A.; Sanchez,A.; Aguero,M.; Pastori, A.; Zecchin, B.; Fusaro, A.; Schivo, A.; Salviato, A.; Palumbo, E.; Giussani, E.; Monne, I.; Terregino, C.
EPI2236191	PA	Canada	2022-May-19	EPI_ISL_16013982	A/Wild Mink/ON/FAV-0529-01/2022	Ontario Veterinary College, University of Guelph	Canadian Food Inspection Agency	Alkie, Tamiru; Cox, Sherri; Ojkic, Davor; Stevens, Brian; Xu, Wanhong; Hisanaga, Tamiko; Suderman, Suderman; Koziuk, Janice; Kruczkiewicz, Peter; Nguyen, Hoang Hai; Fisher, Mathew; Lung, Oliver; Berhane, Yohannes
EPI2220617	PA	Spain	2022-Oct-18	EPI_ISL_15878542	A/Mink/Spain/3691-3_22VIR10586-9/2022	Laboratorio Central de Veterinaria	Istituto Zooprofilattico Sperimentale delle Venezie	Ruano, M.J.; Rocha, A.; Sanchez, A.; Aguero, M; Barbierato, G.; Zecchin, B.; Fusaro, A.; Schivo, A.; Salviato, A.; Palumbo, E.; Giussani, E.; Pastori, A.; Monne, I.; Terregino, C.
EPI2220593	PA	Spain	2022-Oct-18	EPI_ISL_15878539	A/Mink/Spain/3691-8_22VIR10586-10/2022	Laboratorio Central de Veterinaria	Istituto Zooprofilattico Sperimentale delle Venezie	Ruano, M.J.; Rocha, A.; Sanchez, A.; Aguero, M; Barbierato, G.; Zecchin, B.; Fusaro, A.; Schivo, A.; Salviato, A.; Palumbo, E.; Giussani, E.; Pastori, A.; Monne, I.; Terregino, C.
EPI2652296	PA	Poland	2023-Jan-01	EPI_ISL_18033418	A/domestic_cat/Poland/H322-M/2023	National Veterinary Research Institut Poland, PIWet-PIB	National Veterinary Research Institut Poland, PIWet-PIB	Swieton,Edyta;Tarasiuk,Karolina;Wyrostek,Krzysztof;Stys-Fijol,Natalia;Domanska-Blicharz,Katarzyna
EPI2652289	PA	Poland	2023-Jan-01	EPI_ISL_18033417	A/domestic_cat/Poland/H321-M/2023	National Veterinary Research Institut Poland, PIWet-PIB	National Veterinary Research Institut Poland, PIWet-PIB	Swieton,Edyta;Tarasiuk,Karolina;Wyrostek,Krzysztof;Stys-Fijol,Natalia;Domanska-Blicharz,Katarzyna
EPI2652282	PA	Poland	2023-Jan-01	EPI_ISL_18033416	A/domestic_cat/Poland/H320-M/2023	National Veterinary Research Institut Poland, PIWet-PIB	National Veterinary Research Institut Poland, PIWet-PIB	Swieton,Edyta;Tarasiuk,Karolina;Wyrostek,Krzysztof;Stys-Fijol,Natalia;Domanska-Blicharz,Katarzyna
EPI2652275	PA	Poland	2023-Jan-01	EPI_ISL_18033415	A/domestic_cat/Poland/H319-M/2023	National Veterinary Research Institut Poland, PIWet-PIB	National Veterinary Research Institut Poland, PIWet-PIB	Swieton,Edyta;Tarasiuk,Karolina;Wyrostek,Krzysztof;Stys-Fijol,Natalia;Domanska-Blicharz,Katarzyna
EPI2652268	PA	Poland	2023-Jul-06	EPI_ISL_18033414	A/domestic_cat/Poland/H314-W3/2023	National Veterinary Research Institut Poland, PIWet-PIB	National Veterinary Research Institut Poland, PIWet-PIB	Swieton,Edyta;Tarasiuk,Karolina;Wyrostek,Krzysztof;Stys-Fijol,Natalia;Domanska-Blicharz,Katarzyna
EPI2652261	PA	Poland	2023-Jan-01	EPI_ISL_18033413	A/domestic_cat/Poland/H304-M2/2023	National Veterinary Research Institut Poland, PIWet-PIB	National Veterinary Research Institut Poland, PIWet-PIB	Swieton,Edyta;Tarasiuk,Karolina;Wyrostek,Krzysztof;Stys-Fijol,Natalia;Domanska-Blicharz,Katarzyna
EPI2652254	PA	Poland	2023-Jan-01	EPI_ISL_18033412	A/domestic_cat/Poland/H304-M1/2023	National Veterinary Research Institut Poland, PIWet-PIB	National Veterinary Research Institut Poland, PIWet-PIB	Swieton,Edyta;Tarasiuk,Karolina;Wyrostek,Krzysztof;Stys-Fijol,Natalia;Domanska-Blicharz,Katarzyna
EPI2652247	PA	Poland	2023-Jan-01	EPI_ISL_18033411	A/domestic_cat/Poland/H299-N/2023	National Veterinary Research Institut Poland, PIWet-PIB	National Veterinary Research Institut Poland, PIWet-PIB	Swieton,Edyta;Tarasiuk,Karolina;Wyrostek,Krzysztof;Stys-Fijol,Natalia;Domanska-Blicharz,Katarzyna
EPI2652240	PA	Poland	2023-Jan-01	EPI_ISL_18033410	A/domestic_cat/Poland/H293-N/2023	National Veterinary Research Institut Poland, PIWet-PIB	National Veterinary Research Institut Poland, PIWet-PIB	Swieton,Edyta;Tarasiuk,Karolina;Wyrostek,Krzysztof;Stys-Fijol,Natalia;Domanska-Blicharz,Katarzyna
EPI2652233	PA	Poland	2023-Jan-01	EPI_ISL_18033409	A/domestic_cat/Poland/H275k3-M/2023	National Veterinary Research Institut Poland, PIWet-PIB	National Veterinary Research Institut Poland, PIWet-PIB	Swieton,Edyta;Tarasiuk,Karolina;Wyrostek,Krzysztof;Stys-Fijol,Natalia;Domanska-Blicharz,Katarzyna
EPI2616226	PA	Poland	2023-Jun-26	EPI_ISL_17971998	A/domestic_cat/Poland/H264-G/2023(H5N1)	National Veterinary Research Institut Poland, PIWet-PIB	National Veterinary Research Institut Poland, PIWet-PIB	Swieton, E.;Domanska-Blicharz, K.;Tarasiuk, K.; Wyrostek, K.;Stys-Fijol, N.
EPI2616210	PA	Poland	2023-Jun-25	EPI_ISL_17971996	A/domestic_cat/Poland/H271-W/2023(H5N1)	National Veterinary Research Institut Poland, PIWet-PIB	National Veterinary Research Institut Poland, PIWet-PIB	Swieton, E.;Domanska-Blicharz, K.;Tarasiuk, K.; Wyrostek, K.;Stys-Fijol, N.
EPI2616202	PA	Poland	2023-Jun-25	EPI_ISL_17971995	A/domestic_cat/Poland/H270-W/2023(H5N1)	National Veterinary Research Institut Poland, PIWet-PIB	National Veterinary Research Institut Poland, PIWet-PIB	Swieton, E.;Domanska-Blicharz, K.;Tarasiuk, K.; Wyrostek, K.;Stys-Fijol, N.
EPI2616194	PA	Poland	2023-Jun-25	EPI_ISL_17971994	A/domestic_cat/Poland/H267-W/2023(H5N1)	National Veterinary Research Institut Poland, PIWet-PIB	National Veterinary Research Institut Poland, PIWet-PIB	Swieton, E.;Domanska-Blicharz, K.;Tarasiuk, K.; Wyrostek, K.;Stys-Fijol, N.
EPI2616186	PA	Poland	2023-Jun-19	EPI_ISL_17971993	A/domestic_cat/Poland/H266-W/2023(H5N1)	National Veterinary Research Institut Poland, PIWet-PIB	National Veterinary Research Institut Poland, PIWet-PIB	Swieton, E.;Domanska-Blicharz, K.;Tarasiuk, K.; Wyrostek, K.;Stys-Fijol, N.
EPI2616178	PA	Poland	2023-Jun-26	EPI_ISL_17971992	A/domestic_cat/Poland/H263-G/2023(H5N1)	National Veterinary Research Institut Poland, PIWet-PIB	National Veterinary Research Institut Poland, PIWet-PIB	Swieton, E.;Domanska-Blicharz, K.;Tarasiuk, K.; Wyrostek, K.;Stys-Fijol, N.
EPI2616170	PA	Poland	2023-Jun-24	EPI_ISL_17971991	A/domestic_cat/Poland/H257-G/2023(H5N1)	National Veterinary Research Institut Poland, PIWet-PIB	National Veterinary Research Institut Poland, PIWet-PIB	Swieton, E.;Domanska-Blicharz, K.;Tarasiuk, K.; Wyrostek, K.;Stys-Fijol, N.
EPI2616162	PA	Poland	2023-Jun-24	EPI_ISL_17971990	A/domestic_cat/Poland/H256-G/2023(H5N1)	National Veterinary Research Institut Poland, PIWet-PIB	National Veterinary Research Institut Poland, PIWet-PIB	Swieton, E.;Domanska-Blicharz, K.;Tarasiuk, K.; Wyrostek, K.;Stys-Fijol, N.
EPI2616154	PA	Poland	2023-Jun-21	EPI_ISL_17971989	A/domestic_cat/Poland/H255-M/2023(H5N1)	National Veterinary Research Institut Poland, PIWet-PIB	National Veterinary Research Institut Poland, PIWet-PIB	Swieton, E.;Domanska-Blicharz, K.;Tarasiuk, K.; Wyrostek, K.;Stys-Fijol, N.
EPI2610812	PA	Poland	2023-Jun-20	EPI_ISL_17951055	A/domestic_cat/Poland/H247/2023	National Veterinary Research Institut Poland, PIWet-PIB	National Veterinary Research Institut Poland, PIWet-PIB	Edyta,≈öwiƒôto≈Ñ; Katarzyna,Doma≈Ñska-Blicharz; Aleksandra,Giza; Marta,Pietruk; Karolina,Tarasiuk; Krzysztof,Wyrostek; Natalia, Sty≈õ-Fijo≈Ç
EPI2610796	PA	Poland	2023-Jun-22	EPI_ISL_17951053	A/domestic_cat/Poland/H254/2023	National Veterinary Research Institut Poland, PIWet-PIB	National Veterinary Research Institut Poland, PIWet-PIB	Edyta,≈öwiƒôto≈Ñ; Katarzyna,Doma≈Ñska-Blicharz; Aleksandra,Giza; Marta,Pietruk; Karolina,Tarasiuk; Krzysztof,Wyrostek; Natalia, Sty≈õ-Fijo≈Ç
EPI2610772	PA	Poland	2023-Jun-22	EPI_ISL_17950995	A/domestic_cat/Poland/H249/2023	National Veterinary Research Institut Poland, PIWet-PIB	National Veterinary Research Institut Poland, PIWet-PIB	Edyta,≈öwiƒôto≈Ñ; Katarzyna,Doma≈Ñska-Blicharz; Aleksandra,Giza; Marta,Pietruk; Karolina,Tarasiuk; Krzysztof,Wyrostek; Natalia, Sty≈õ-Fijo≈Ç
EPI2603670	PA	United States	2023-Mar-30	EPI_ISL_17821770	A/cat/Nebraska/23-010184-001/2023	Nebraska Veterinary Diagnostic Center	National Veterinary Services Laboratories - USDA	Chinh,Thanh;Franzen,Kerrie;Love,Emily;Ozella,Mikaela;Killian,Mary;Lantz,Kristina;Stuber,Tod;Hicks,Jessica;Norris,Cameron
EPI2281677	PA	France	2022-Dec-24	EPI_ISL_16395206	A/cat/France/22P026544/2022	Anses (Ploufragan-Plouzan√©)	ANSES Agence Nationale De Securite Sanitaire De L‚Äôalimentation
EPI2917766	PA	Finland	2023-Oct-17	EPI_ISL_18771245	A/white mink/Finland/UH-361-E1/2023	University of Helsinki, Department of Virology	Finnish Institute for Health and Welfare, THL	Altan, E; Avelin, V; Lindh, E; Savolainen-Kopra, C; Sironen, T; √ñsterlund, P.
EPI2907889	PA	Finland	2023-Sep-20	EPI_ISL_18755130	A/mink/Finland/3082/2023	Finnish Food Authority	Finnish Food Authority	Kauppinen, Ari; Kareinen, Lauri; Tammiranta, Niina; Kantala, Tuija; Fusaro, Alice; Gadd, Tuija
EPI2755655	PA	Finland	2023-Aug-07	EPI_ISL_18290480	A/mink/Finland/735/2023	Finnish Food Authority	Finnish Food Authority	Kauppinen, Ari; Kareinen, Lauri; Tammiranta, Niina; Kantala, Tuija; Fusaro, Alice; Gadd, Tuija
EPI2755647	PA	Finland	2023-Aug-07	EPI_ISL_18290479	A/mink/Finland/731/2023	Finnish Food Authority	Finnish Food Authority	Kauppinen, Ari; Kareinen, Lauri; Tammiranta, Niina; Kantala, Tuija; Fusaro, Alice; Gadd, Tuija
EPI2755563	PA	Finland	2023-Jul-03	EPI_ISL_18290468	A/mink/Finland/1003/2023	Finnish Food Authority	Finnish Food Authority	Kauppinen, Ari; Kareinen, Lauri; Tammiranta, Niina; Kantala, Tuija; Fusaro, Alice; Gadd, Tuija
EPI2755769	PA	Finland	2023-Jul-03	EPI_ISL_18290467	A/mink/Finland/1002/2023	Finnish Food Authority	Finnish Food Authority	Kauppinen, Ari; Kareinen, Lauri; Tammiranta, Niina; Kantala, Tuija; Fusaro, Alice; Gadd, Tuija
EPI2641539	PA	Finland	2023-Jul-03	EPI_ISL_18011231	A/mink/Finland/1002_23VIR6803-8/2023	Finnish Food Authority	Istituto Zooprofilattico Sperimentale Delle Venezie	Kantala, T.;Kauppinen, A.;Kareinen, L.;Gadd, T.;Galiano, M.;Ikonen, N.;Lindh, E.;Ormelli, S.;Varotto, M.;Zecchin, B.;Pastori, A.;Fusaro, A.;Zamperin, G.;Monne, I.;Terregino, C
EPI2536827	PA	Netherlands	2022-Jan-16	EPI_ISL_17583227	A/Stone Marten/Netherlands/EMC1/2022	Erasmus Medical Center	Erasmus Medical Center	Vuong,O;Thewessen, S;Bellido-Martin,A.B; Chestakova, I; Sikkema, R;Fouchier, R.A.M.
EPI1965225	PA	Netherlands	2022-Jan-17	EPI_ISL_9111104	A/otter/Netherlands/22001014-005/2022	Wageningen Bioveterinary Research	Wageningen Bioveterinary Research	Beerens, Nancy; Harders, Frank; Pritz-Verschuren, Sylvia; Roose, Marit; Venema, Sandra; Germeraad, Evelien; Engelsma, Marc; Heutink, Rene
EPI3261178	PA	United States	2024-Mar-20	EPI_ISL_19094660	A/domestic cat/Oklahoma/24_009118-002/2024	United States Department of Agriculture, Agricultural Research Service, National Animal Disease Center	United States Department of Agriculture, Agricultural Research Service, National Animal Disease Center	Nguyen,T., Hutter,C., Markin,A., Thomas,M., Lantz,K., Killian,M.L., Janzen,G.M., Vijendran,S., Wagle,S., Inderski,B., Magstadt,D.R., Li,G., Diel,D.G., Frye,E.A., Dimitrov,K.M., Swinford,A.K., Thompson,A.C., Snevik,K.R., Suarez,D.L., Spackman,E., Lakin,S.M., C,S., Johnson,K.R., Baker,A.L., Robbe-Austerman,S., Torchetti,M.K.; Anderson,T.K.
EPI3255569	PA	United States	2024-Mar-20	EPI_ISL_19088568	A/feline/Texas/24-029329-02/2024	Iowa State University, Veterinary Microbiology and Preventive Medicine Faculty	Iowa State University, Veterinary Microbiology and Preventive Medicine Faculty	Burrough,E.R., Magstadt,D.R., Petersen,B., Timmermans,S.J., Gauger,P.C., Zhang,J., Siepker,C., Mainenti,M., Li,G., Thompson,A.C., Gorden,P.J., Plummer,P.J.; Main,R.
EPI3255576	PA	United States	2024-Mar-20	EPI_ISL_19088567	A/feline/Texas/24-029329-01/2024	Iowa State University, Veterinary Microbiology and Preventive Medicine Faculty	Iowa State University, Veterinary Microbiology and Preventive Medicine Faculty	Burrough,E.R., Magstadt,D.R., Petersen,B., Timmermans,S.J., Gauger,P.C., Zhang,J., Siepker,C., Mainenti,M., Li,G., Thompson,A.C., Gorden,P.J., Plummer,P.J.; Main,R.
EPI3208231	PA	United States	2023-Jan-01	EPI_ISL_19054399	A/feline/USA/23-037332-001/2023	National Veterinary Services Laboratories - USDA	National Veterinary Services Laboratories - USDA	Aufderhar,Matthew;Franzen,Kerrie;Love,Emily;Killian,Mary;Lantz,Kristina;Stuber,Tod;Hicks,Jessica;Norris,Cameron
EPI3208223	PA	United States	2024-Mar-16	EPI_ISL_19054398	A/feline/USA/24-009311-006/2024	National Veterinary Services Laboratories - USDA	National Veterinary Services Laboratories - USDA	Aufderhar,Matthew;Franzen,Kerrie;Love,Emily;Killian,Mary;Lantz,Kristina;Stuber,Tod;Hicks,Jessica;Norris,Cameron
EPI3208215	PA	United States	2024-Mar-16	EPI_ISL_19054397	A/feline/Texas/24-009311-004/2024	National Veterinary Services Laboratories - USDA	National Veterinary Services Laboratories - USDA	Aufderhar,Matthew;Franzen,Kerrie;Love,Emily;Killian,Mary;Lantz,Kristina;Stuber,Tod;Hicks,Jessica;Norris,Cameron
EPI3208207	PA	United States	2024-Mar-20	EPI_ISL_19054396	A/feline/New Mexico/24-009116-005/2024	National Veterinary Services Laboratories - USDA	National Veterinary Services Laboratories - USDA	Aufderhar,Matthew;Franzen,Kerrie;Love,Emily;Killian,Mary;Lantz,Kristina;Stuber,Tod;Hicks,Jessica;Norris,Cameron
EPI3208199	PA	United States	2024-Mar-20	EPI_ISL_19054395	A/feline/New Mexico/24-009116-004/2024	National Veterinary Services Laboratories - USDA	National Veterinary Services Laboratories - USDA	Aufderhar,Matthew;Franzen,Kerrie;Love,Emily;Killian,Mary;Lantz,Kristina;Stuber,Tod;Hicks,Jessica;Norris,Cameron
EPI3208191	PA	United States	2024-Mar-20	EPI_ISL_19054394	A/feline/New Mexico/24-009116-002/2024	National Veterinary Services Laboratories - USDA	National Veterinary Services Laboratories - USDA	Aufderhar,Matthew;Franzen,Kerrie;Love,Emily;Killian,Mary;Lantz,Kristina;Stuber,Tod;Hicks,Jessica;Norris,Cameron
EPI3208183	PA	United States	2024-Mar-20	EPI_ISL_19054393	A/feline/Texas/24-008850-002/2024	National Veterinary Services Laboratories - USDA	National Veterinary Services Laboratories - USDA	Aufderhar,Matthew;Franzen,Kerrie;Love,Emily;Killian,Mary;Lantz,Kristina;Stuber,Tod;Hicks,Jessica;Norris,Cameron
EPI3208175	PA	United States	2024-Mar-20	EPI_ISL_19054392	A/feline/Texas/24-008850-001/2024	National Veterinary Services Laboratories - USDA	National Veterinary Services Laboratories - USDA	Aufderhar,Matthew;Franzen,Kerrie;Love,Emily;Killian,Mary;Lantz,Kristina;Stuber,Tod;Hicks,Jessica;Norris,Cameron
EPI3208167	PA	United States	2024-Mar-22	EPI_ISL_19054391	A/feline/Texas/24-008764-002/2024	National Veterinary Services Laboratories - USDA	National Veterinary Services Laboratories - USDA	Aufderhar,Matthew;Franzen,Kerrie;Love,Emily;Killian,Mary;Lantz,Kristina;Stuber,Tod;Hicks,Jessica;Norris,Cameron
EPI3208159	PA	United States	2024-Mar-22	EPI_ISL_19054390	A/feline/Texas/24-008764-001/2024	National Veterinary Services Laboratories - USDA	National Veterinary Services Laboratories - USDA	Aufderhar,Matthew;Franzen,Kerrie;Love,Emily;Killian,Mary;Lantz,Kristina;Stuber,Tod;Hicks,Jessica;Norris,Cameron
EPI3261250	PA	United States	2024-Mar-08	EPI_ISL_19094669	A/goat/Minnesota/24_007234-035/2024	United States Department of Agriculture, Agricultural Research Service, National Animal Disease Center	United States Department of Agriculture, Agricultural Research Service, National Animal Disease Center	Nguyen,T., Hutter,C., Markin,A., Thomas,M., Lantz,K., Killian,M.L., Janzen,G.M., Vijendran,S., Wagle,S., Inderski,B., Magstadt,D.R., Li,G., Diel,D.G., Frye,E.A., Dimitrov,K.M., Swinford,A.K., Thompson,A.C., Snevik,K.R., Suarez,D.L., Spackman,E., Lakin,S.M., C,S., Johnson,K.R., Baker,A.L., Robbe-Austerman,S., Torchetti,M.K.; Anderson,T.K.
EPI3261242	PA	United States	2024-Mar-08	EPI_ISL_19094668	A/goat/Minnesota/24_007234-034/2024	United States Department of Agriculture, Agricultural Research Service, National Animal Disease Center	United States Department of Agriculture, Agricultural Research Service, National Animal Disease Center	Nguyen,T., Hutter,C., Markin,A., Thomas,M., Lantz,K., Killian,M.L., Janzen,G.M., Vijendran,S., Wagle,S., Inderski,B., Magstadt,D.R., Li,G., Diel,D.G., Frye,E.A., Dimitrov,K.M., Swinford,A.K., Thompson,A.C., Snevik,K.R., Suarez,D.L., Spackman,E., Lakin,S.M., C,S., Johnson,K.R., Baker,A.L., Robbe-Austerman,S., Torchetti,M.K.; Anderson,T.K.
EPI3261234	PA	United States	2024-Mar-08	EPI_ISL_19094667	A/goat/Minnesota/24_007234-032/2024	United States Department of Agriculture, Agricultural Research Service, National Animal Disease Center	United States Department of Agriculture, Agricultural Research Service, National Animal Disease Center	Nguyen,T., Hutter,C., Markin,A., Thomas,M., Lantz,K., Killian,M.L., Janzen,G.M., Vijendran,S., Wagle,S., Inderski,B., Magstadt,D.R., Li,G., Diel,D.G., Frye,E.A., Dimitrov,K.M., Swinford,A.K., Thompson,A.C., Snevik,K.R., Suarez,D.L., Spackman,E., Lakin,S.M., C,S., Johnson,K.R., Baker,A.L., Robbe-Austerman,S., Torchetti,M.K.; Anderson,T.K.
EPI3261226	PA	United States	2024-Mar-08	EPI_ISL_19094666	A/goat/Minnesota/24_007234-030/2024	United States Department of Agriculture, Agricultural Research Service, National Animal Disease Center	United States Department of Agriculture, Agricultural Research Service, National Animal Disease Center	Nguyen,T., Hutter,C., Markin,A., Thomas,M., Lantz,K., Killian,M.L., Janzen,G.M., Vijendran,S., Wagle,S., Inderski,B., Magstadt,D.R., Li,G., Diel,D.G., Frye,E.A., Dimitrov,K.M., Swinford,A.K., Thompson,A.C., Snevik,K.R., Suarez,D.L., Spackman,E., Lakin,S.M., C,S., Johnson,K.R., Baker,A.L., Robbe-Austerman,S., Torchetti,M.K.; Anderson,T.K.
EPI3261218	PA	United States	2024-Mar-08	EPI_ISL_19094665	A/goat/Minnesota/24_007234-029/2024	United States Department of Agriculture, Agricultural Research Service, National Animal Disease Center	United States Department of Agriculture, Agricultural Research Service, National Animal Disease Center	Nguyen,T., Hutter,C., Markin,A., Thomas,M., Lantz,K., Killian,M.L., Janzen,G.M., Vijendran,S., Wagle,S., Inderski,B., Magstadt,D.R., Li,G., Diel,D.G., Frye,E.A., Dimitrov,K.M., Swinford,A.K., Thompson,A.C., Snevik,K.R., Suarez,D.L., Spackman,E., Lakin,S.M., C,S., Johnson,K.R., Baker,A.L., Robbe-Austerman,S., Torchetti,M.K.; Anderson,T.K.
EPI3261090	PA	United States	2024-Mar-08	EPI_ISL_19094649	A/goat/Minnesota/24_007234-036/2024	United States Department of Agriculture, Agricultural Research Service, National Animal Disease Center	United States Department of Agriculture, Agricultural Research Service, National Animal Disease Center	Nguyen,T., Hutter,C., Markin,A., Thomas,M., Lantz,K., Killian,M.L., Janzen,G.M., Vijendran,S., Wagle,S., Inderski,B., Magstadt,D.R., Li,G., Diel,D.G., Frye,E.A., Dimitrov,K.M., Swinford,A.K., Thompson,A.C., Snevik,K.R., Suarez,D.L., Spackman,E., Lakin,S.M., C,S., Johnson,K.R., Baker,A.L., Robbe-Austerman,S., Torchetti,M.K.; Anderson,T.K.
EPI3261082	PA	United States	2024-Mar-08	EPI_ISL_19094648	A/goat/Minnesota/24_007234-037/2024	United States Department of Agriculture, Agricultural Research Service, National Animal Disease Center	United States Department of Agriculture, Agricultural Research Service, National Animal Disease Center	Nguyen,T., Hutter,C., Markin,A., Thomas,M., Lantz,K., Killian,M.L., Janzen,G.M., Vijendran,S., Wagle,S., Inderski,B., Magstadt,D.R., Li,G., Diel,D.G., Frye,E.A., Dimitrov,K.M., Swinford,A.K., Thompson,A.C., Snevik,K.R., Suarez,D.L., Spackman,E., Lakin,S.M., C,S., Johnson,K.R., Baker,A.L., Robbe-Austerman,S., Torchetti,M.K.; Anderson,T.K.
EPI3261074	PA	United States	2024-Mar-08	EPI_ISL_19094647	A/goat/Minnesota/24_007234-044/2024	United States Department of Agriculture, Agricultural Research Service, National Animal Disease Center	United States Department of Agriculture, Agricultural Research Service, National Animal Disease Center	Nguyen,T., Hutter,C., Markin,A., Thomas,M., Lantz,K., Killian,M.L., Janzen,G.M., Vijendran,S., Wagle,S., Inderski,B., Magstadt,D.R., Li,G., Diel,D.G., Frye,E.A., Dimitrov,K.M., Swinford,A.K., Thompson,A.C., Snevik,K.R., Suarez,D.L., Spackman,E., Lakin,S.M., C,S., Johnson,K.R., Baker,A.L., Robbe-Austerman,S., Torchetti,M.K.; Anderson,T.K.
EPI3261066	PA	United States	2024-Mar-08	EPI_ISL_19094646	A/goat/Minnesota/24_007234-047/2024	United States Department of Agriculture, Agricultural Research Service, National Animal Disease Center	United States Department of Agriculture, Agricultural Research Service, National Animal Disease Center	Nguyen,T., Hutter,C., Markin,A., Thomas,M., Lantz,K., Killian,M.L., Janzen,G.M., Vijendran,S., Wagle,S., Inderski,B., Magstadt,D.R., Li,G., Diel,D.G., Frye,E.A., Dimitrov,K.M., Swinford,A.K., Thompson,A.C., Snevik,K.R., Suarez,D.L., Spackman,E., Lakin,S.M., C,S., Johnson,K.R., Baker,A.L., Robbe-Austerman,S., Torchetti,M.K.; Anderson,T.K.
EPI3260994	PA	United States	2024-Feb-23	EPI_ISL_19094637	A/skunk/Washington/24_005959-006/2024	United States Department of Agriculture, Agricultural Research Service, National Animal Disease Center	United States Department of Agriculture, Agricultural Research Service, National Animal Disease Center	Nguyen,T., Hutter,C., Markin,A., Thomas,M., Lantz,K., Killian,M.L., Janzen,G.M., Vijendran,S., Wagle,S., Inderski,B., Magstadt,D.R., Li,G., Diel,D.G., Frye,E.A., Dimitrov,K.M., Swinford,A.K., Thompson,A.C., Snevik,K.R., Suarez,D.L., Spackman,E., Lakin,S.M., C,S., Johnson,K.R., Baker,A.L., Robbe-Austerman,S., Torchetti,M.K.; Anderson,T.K.
EPI3260986	PA	United States	2024-Feb-23	EPI_ISL_19094636	A/skunk/Washington/24_005959-005/2024	United States Department of Agriculture, Agricultural Research Service, National Animal Disease Center	United States Department of Agriculture, Agricultural Research Service, National Animal Disease Center	Nguyen,T., Hutter,C., Markin,A., Thomas,M., Lantz,K., Killian,M.L., Janzen,G.M., Vijendran,S., Wagle,S., Inderski,B., Magstadt,D.R., Li,G., Diel,D.G., Frye,E.A., Dimitrov,K.M., Swinford,A.K., Thompson,A.C., Snevik,K.R., Suarez,D.L., Spackman,E., Lakin,S.M., C,S., Johnson,K.R., Baker,A.L., Robbe-Austerman,S., Torchetti,M.K.; Anderson,T.K.
EPI3260978	PA	United States	2024-Feb-23	EPI_ISL_19094635	A/skunk/Washington/24_005959-004/2024	United States Department of Agriculture, Agricultural Research Service, National Animal Disease Center	United States Department of Agriculture, Agricultural Research Service, National Animal Disease Center	Nguyen,T., Hutter,C., Markin,A., Thomas,M., Lantz,K., Killian,M.L., Janzen,G.M., Vijendran,S., Wagle,S., Inderski,B., Magstadt,D.R., Li,G., Diel,D.G., Frye,E.A., Dimitrov,K.M., Swinford,A.K., Thompson,A.C., Snevik,K.R., Suarez,D.L., Spackman,E., Lakin,S.M., C,S., Johnson,K.R., Baker,A.L., Robbe-Austerman,S., Torchetti,M.K.; Anderson,T.K.
EPI3260970	PA	United States	2024-Mar-23	EPI_ISL_19094634	A/raccoon/New Mexico/24_009496-002/2024	United States Department of Agriculture, Agricultural Research Service, National Animal Disease Center	United States Department of Agriculture, Agricultural Research Service, National Animal Disease Center	Nguyen,T., Hutter,C., Markin,A., Thomas,M., Lantz,K., Killian,M.L., Janzen,G.M., Vijendran,S., Wagle,S., Inderski,B., Magstadt,D.R., Li,G., Diel,D.G., Frye,E.A., Dimitrov,K.M., Swinford,A.K., Thompson,A.C., Snevik,K.R., Suarez,D.L., Spackman,E., Lakin,S.M., C,S., Johnson,K.R., Baker,A.L., Robbe-Austerman,S., Torchetti,M.K.; Anderson,T.K.
EPI3260938	PA	United States	2024-Mar-08	EPI_ISL_19094630	A/goat/Minnesota/24_007234-050/2024	United States Department of Agriculture, Agricultural Research Service, National Animal Disease Center	United States Department of Agriculture, Agricultural Research Service, National Animal Disease Center	Nguyen,T., Hutter,C., Markin,A., Thomas,M., Lantz,K., Killian,M.L., Janzen,G.M., Vijendran,S., Wagle,S., Inderski,B., Magstadt,D.R., Li,G., Diel,D.G., Frye,E.A., Dimitrov,K.M., Swinford,A.K., Thompson,A.C., Snevik,K.R., Suarez,D.L., Spackman,E., Lakin,S.M., C,S., Johnson,K.R., Baker,A.L., Robbe-Austerman,S., Torchetti,M.K.; Anderson,T.K.
EPI3260930	PA	United States	2024-Mar-08	EPI_ISL_19094629	A/goat/Minnesota/24_007234-048/2024	United States Department of Agriculture, Agricultural Research Service, National Animal Disease Center	United States Department of Agriculture, Agricultural Research Service, National Animal Disease Center	Nguyen,T., Hutter,C., Markin,A., Thomas,M., Lantz,K., Killian,M.L., Janzen,G.M., Vijendran,S., Wagle,S., Inderski,B., Magstadt,D.R., Li,G., Diel,D.G., Frye,E.A., Dimitrov,K.M., Swinford,A.K., Thompson,A.C., Snevik,K.R., Suarez,D.L., Spackman,E., Lakin,S.M., C,S., Johnson,K.R., Baker,A.L., Robbe-Austerman,S., Torchetti,M.K.; Anderson,T.K.
EPI3244334	PA	United States	2024-Feb-26	EPI_ISL_19083124	A/Mountain Lion/Montana/01/2024	Montana Public Health Laboratory	National Institute of Allergy and Infectious Diseases NIAID/NIH	Williamson, Brandi; Anzick, Sarah; Yinda, C. Kwe; Beare, Paul; Kanakabandi, Kishore; Martens, Craig; de Wit, Emmie; Munster, Vincent
EPI3229799	PA	Uruguay	2023-Sep-06	EPI_ISL_19070498	A/pinniped/Uruguay/P4_6923/2023	Universidad de la Rep√∫blica, Facultad de Ciencias, Genetica Evolutiva/Divisi√≥n de Laboratorios Veterinarios, Plataforma Genomica		Tomas,G., Marandino,A., Panzera,Y., Rodriguez,S., Wallau,G.L., Dezordi,F.Z., Perez,R., Bassetti,L., Negro,R., Williman,J., Uriarte,V., Grazioli,F., Leizagoyen,C., Riveron,S., Coronel,J., Bello,S., Paez,E., Lima,M., Mendez,V.; Perez,R.
EPI3229726	PA	Uruguay	2023-Sep-14	EPI_ISL_19070486	A/pinniped/Uruguay/P18_14923/2023	Universidad de la Rep√∫blica, Facultad de Ciencias, Genetica Evolutiva/Divisi√≥n de Laboratorios Veterinarios, Plataforma Genomica		Tomas,G., Marandino,A., Panzera,Y., Rodriguez,S., Wallau,G.L., Dezordi,F.Z., Perez,R., Bassetti,L., Negro,R., Williman,J., Uriarte,V., Grazioli,F., Leizagoyen,C., Riveron,S., Coronel,J., Bello,S., Paez,E., Lima,M., Mendez,V.; Perez,R.
EPI3229718	PA	Uruguay	2023-Sep-14	EPI_ISL_19070485	A/pinniped/Uruguay/P17_14923/2023	Universidad de la Rep√∫blica, Facultad de Ciencias, Genetica Evolutiva/Divisi√≥n de Laboratorios Veterinarios, Plataforma Genomica		Tomas,G., Marandino,A., Panzera,Y., Rodriguez,S., Wallau,G.L., Dezordi,F.Z., Perez,R., Bassetti,L., Negro,R., Williman,J., Uriarte,V., Grazioli,F., Leizagoyen,C., Riveron,S., Coronel,J., Bello,S., Paez,E., Lima,M., Mendez,V.; Perez,R.
EPI3229704	PA	Uruguay	2023-Sep-11	EPI_ISL_19070483	A/pinniped/Uruguay/P14_11923/2023	Universidad de la Rep√∫blica, Facultad de Ciencias, Genetica Evolutiva/Divisi√≥n de Laboratorios Veterinarios, Plataforma Genomica		Tomas,G., Marandino,A., Panzera,Y., Rodriguez,S., Wallau,G.L., Dezordi,F.Z., Perez,R., Bassetti,L., Negro,R., Williman,J., Uriarte,V., Grazioli,F., Leizagoyen,C., Riveron,S., Coronel,J., Bello,S., Paez,E., Lima,M., Mendez,V.; Perez,R.
EPI3229696	PA	Uruguay	2023-Sep-11	EPI_ISL_19070482	A/pinniped/Uruguay/P13_11923/2023	Universidad de la Rep√∫blica, Facultad de Ciencias, Genetica Evolutiva/Divisi√≥n de Laboratorios Veterinarios, Plataforma Genomica		Tomas,G., Marandino,A., Panzera,Y., Rodriguez,S., Wallau,G.L., Dezordi,F.Z., Perez,R., Bassetti,L., Negro,R., Williman,J., Uriarte,V., Grazioli,F., Leizagoyen,C., Riveron,S., Coronel,J., Bello,S., Paez,E., Lima,M., Mendez,V.; Perez,R.
EPI3229688	PA	Uruguay	2023-Sep-08	EPI_ISL_19070481	A/pinniped/Uruguay/P10_8923/2023	Universidad de la Rep√∫blica, Facultad de Ciencias, Genetica Evolutiva/Divisi√≥n de Laboratorios Veterinarios, Plataforma Genomica		Tomas,G., Marandino,A., Panzera,Y., Rodriguez,S., Wallau,G.L., Dezordi,F.Z., Perez,R., Bassetti,L., Negro,R., Williman,J., Uriarte,V., Grazioli,F., Leizagoyen,C., Riveron,S., Coronel,J., Bello,S., Paez,E., Lima,M., Mendez,V.; Perez,R.
EPI3162329	PA	United States	2024-Mar-08	EPI_ISL_19015125	A/goat/Minnesota/24-007234-009/2024	National Veterinary Services Laboratories - USDA	National Veterinary Services Laboratories - USDA	Aufderhar,Matthew;Franzen,Kerrie;Love,Emily;Killian,Mary;Lantz,Kristina;Stuber,Tod;Hicks,Jessica;Norris,Cameron
EPI3162321	PA	United States	2024-Mar-08	EPI_ISL_19015124	A/goat/Minnesota/24-007234-006/2024	National Veterinary Services Laboratories - USDA	National Veterinary Services Laboratories - USDA	Aufderhar,Matthew;Franzen,Kerrie;Love,Emily;Killian,Mary;Lantz,Kristina;Stuber,Tod;Hicks,Jessica;Norris,Cameron
EPI3162313	PA	United States	2024-Mar-08	EPI_ISL_19015123	A/goat/Minnesota/24-007234-003/2024	National Veterinary Services Laboratories - USDA	National Veterinary Services Laboratories - USDA	Aufderhar,Matthew;Franzen,Kerrie;Love,Emily;Killian,Mary;Lantz,Kristina;Stuber,Tod;Hicks,Jessica;Norris,Cameron
EPI3110583	PA	United States	2023-Oct-01	EPI_ISL_18976667	A/polar bear/Alaska/23-038123/2023	United States Department of Agriculture, National Veterinary Services Laboratories-Diagnostic Virology Laboratory	National Veterinary Services Laboratories - USDA	Franzen,Kerrie;Love,Emily;Ozella,Mikaela;Killian,Mary;Lantz,Kristina;Stuber,Tod;Hicks,Jessica;Norris,Cameron
EPI3084240	PA	Argentina	2023-Aug-26	EPI_ISL_18945320	A/South American fur seal/Argentina/RN-PB019/2023	Instituto Nacional de Tecnologia Agropecuaria, Instituto de Virologia e Innovaciones Tecnologicas		Rimondi,A., Vanstreels,R.E.T., Olivera,V.S., Donini,A., Miqueo Lauriente,M.; Uhart,M.
EPI2759135	PA	United States	2023-Aug-29	EPI_ISL_18311028	A/harbor seal/Washington/23-026504-002/2023	National Veterinary Services Laboratories - USDA	National Veterinary Services Laboratories - USDA	Chinh,Thanh;Franzen,Kerrie;Love,Emily;Ozella,Mikaela;Killian,Mary;Lantz,Kristina;Stuber,Tod;Hicks,Jessica;Norris,Cameron
EPI2759127	PA	United States	2023-Aug-29	EPI_ISL_18311027	A/harbor seal/Washington/23-026504-001/2023	National Veterinary Services Laboratories - USDA	National Veterinary Services Laboratories - USDA	Chinh,Thanh;Franzen,Kerrie;Love,Emily;Ozella,Mikaela;Killian,Mary;Lantz,Kristina;Stuber,Tod;Hicks,Jessica;Norris,Cameron
EPI2759111	PA	United States	2023-Aug-25	EPI_ISL_18311025	A/harbor seal/Washington/23-025991-001/2023	National Veterinary Services Laboratories - USDA	National Veterinary Services Laboratories - USDA	Chinh,Thanh;Franzen,Kerrie;Love,Emily;Ozella,Mikaela;Killian,Mary;Lantz,Kristina;Stuber,Tod;Hicks,Jessica;Norris,Cameron
EPI2759103	PA	United States	2023-Aug-19	EPI_ISL_18311024	A/harbor seal/Washington/23-025744-002/2023	National Veterinary Services Laboratories - USDA	National Veterinary Services Laboratories - USDA	Chinh,Thanh;Franzen,Kerrie;Love,Emily;Ozella,Mikaela;Killian,Mary;Lantz,Kristina;Stuber,Tod;Hicks,Jessica;Norris,Cameron
EPI2759095	PA	United States	2023-Aug-19	EPI_ISL_18311023	A/harbor seal/Washington/23-025744-001/2023	National Veterinary Services Laboratories - USDA	National Veterinary Services Laboratories - USDA	Chinh,Thanh;Franzen,Kerrie;Love,Emily;Ozella,Mikaela;Killian,Mary;Lantz,Kristina;Stuber,Tod;Hicks,Jessica;Norris,Cameron
EPI2745241	PA	Peru	2022-Nov-22	EPI_ISL_18265431	A/dolphin/Peru/PIU-SER002/2022	Servicio Nacional Forestal y de Fauna Silvestre (SERFOR)	Pontificia Universidad Catolica del Peru	Leguia,M.; Garcia-Glaessner,A.; Munoz-Saavedra,B.; Juarez,D.; Barrera,P.; Jara,J.; Silva,W.; Ploog,K.; Colchao-Claux,P.; Lescano,J.
EPI2664222	PA	Peru	2022-Nov-22	EPI_ISL_18054503	A/dolphin/Peru/PIU-002/2022			Leguia,M., Garcia-Glaessner,A., Munoz-Saavedra,B., Juarez,D., Barrera,P., Jara,J., Silva,W., Ploog,K., Colchao-Claux,P.; Lescano,J.
EPI2471932	PA	United Kingdom	2022-Nov-18	EPI_ISL_17257532	A/Bush_dog/England/037680/2022	Animal and Plant Health Agency (APHA)	Animal and Plant Health Agency (APHA)
EPI2437551	PA	Canada	2022-May-18	EPI_ISL_17073215	A/striped_skunk/BC/AIVPHL-118/2022	B.C. Centre for Disease Control	British Columbia Centre for Disease Control	Himsworth, Chelsea; Prystajecky,Natalie; Tyson,John; Jassem,Agatha; Kuchinski,Kevin; Coombe, Michelle; Lee,Tracy; Azana,Rob; Fung,Janet; Chan,Michael; Cheung,Branco; Caleta,Jessica; Tsang,Frankie; Russell,Shannon; Zlosnik,James; Hoang,Linda
EPI2437034	PA	Belgium	2023-Feb-09	EPI_ISL_17072114	A/Mustela_putorius/Belgium/01421_0001/2023	Sciensano - Animal Infectious Diseases	Sciensano, Department of Animal Infectious Diseases	Van Borm, Steven; Roupie, Virginie; Hostyn, Pierre; Mathijs, Elisabeth; Lambrecht, Benedicte; Steensels, Mieke
EPI2263646	PA	United States	2022-Nov-15	EPI_ISL_16297122	A/skunk/Wisconsin/22-037029-001/2022	National Veterinary Services Laboratories - USDA	National Veterinary Services Laboratories - USDA	Chinh,Thanh;Love, Emily;Franzen,Kerrie;Killian,Mary;Koster,Leo;Lantz,Kristina;Stuber,Tod;Hicks,Jessica
EPI2263438	PA	United States	2022-Oct-21	EPI_ISL_16297066	A/skunk/Minnesota/22-034925-001/2022	National Veterinary Services Laboratories - USDA	National Veterinary Services Laboratories - USDA	Chinh,Thanh;Love, Emily;Franzen,Kerrie;Killian,Mary;Koster,Leo;Lantz,Kristina;Stuber,Tod;Hicks,Jessica
EPI2236751	PA	Canada	2022-Apr-26	EPI_ISL_16023453	A/Skunk/AB/FAV-0416-03/2022	Alberta Agriculture and Forestry, Government of Alberta	Canadian Food Inspection Agency	Alkie, Tamiru; Hicks, Mark; Pybuse, Margo J; Xu, Wanhong; Hisanaga, Tamiko; Suderman, Suderman; Koziuk, Janice; Kruczkiewicz, Peter; Nguyen, Hoang Hai; Fisher, Mathew; Lung, Oliver; Berhane, Yohannes
EPI2236759	PA	Canada	2022-Apr-22	EPI_ISL_16023452	A/Skunk/AB/FAV-0416-02/2022	Alberta Agriculture and Forestry, Government of Alberta	Canadian Food Inspection Agency	Alkie, Tamiru; Hicks, Mark; Pybuse, Margo J; Xu, Wanhong; Hisanaga, Tamiko; Suderman, Suderman; Koziuk, Janice; Kruczkiewicz, Peter; Nguyen, Hoang Hai; Fisher, Mathew; Lung, Oliver; Berhane, Yohannes
EPI2236743	PA	Canada	2022-Apr-22	EPI_ISL_16023451	A/Skunk/AB/FAV-0416-01/2022	Alberta Agriculture and Forestry, Government of Alberta	Canadian Food Inspection Agency	Alkie, Tamiru; Hicks, Mark; Pybuse, Margo J; Xu, Wanhong; Hisanaga, Tamiko; Suderman, Suderman; Koziuk, Janice; Kruczkiewicz, Peter; Nguyen, Hoang Hai; Fisher, Mathew; Lung, Oliver; Berhane, Yohannes
EPI2236735	PA	Canada	2022-May-31	EPI_ISL_16023450	A/Skunk/AB/FAV-0835-10/2022	Alberta Agriculture and Forestry, Government of Alberta	Canadian Food Inspection Agency	Alkie, Tamiru; Hicks, Mark; Pybuse, Margo J; Xu, Wanhong; Hisanaga, Tamiko; Suderman, Suderman; Koziuk, Janice; Kruczkiewicz, Peter; Nguyen, Hoang Hai; Fisher, Mathew; Lung, Oliver; Berhane, Yohannes
EPI2236727	PA	Canada	2022-May-04	EPI_ISL_16023449	A/Skunk/AB/FAV-0835-07/2022	Alberta Agriculture and Forestry, Government of Alberta	Canadian Food Inspection Agency	Alkie, Tamiru; Hicks, Mark; Pybuse, Margo J; Xu, Wanhong; Hisanaga, Tamiko; Suderman, Suderman; Koziuk, Janice; Kruczkiewicz, Peter; Nguyen, Hoang Hai; Fisher, Mathew; Lung, Oliver; Berhane, Yohannes
EPI2236719	PA	Canada	2022-May-04	EPI_ISL_16023377	A/Skunk/AB/FAV-0835-05/2022	Alberta Agriculture and Forestry, Government of Alberta	Canadian Food Inspection Agency	Alkie, Tamiru; Hicks, Mark; Pybuse, Margo J; Xu, Wanhong; Hisanaga, Tamiko; Suderman, Suderman; Koziuk, Janice; Kruczkiewicz, Peter; Nguyen, Hoang Hai; Fisher, Mathew; Lung, Oliver; Berhane, Yohannes
EPI2236711	PA	Canada	2022-May-31	EPI_ISL_16023376	A/Skunk/AB/FAV-0835-11/2022	Alberta Agriculture and Forestry, Government of Alberta	Canadian Food Inspection Agency	Alkie, Tamiru; Hicks, Mark; Pybuse, Margo J; Xu, Wanhong; Hisanaga, Tamiko; Suderman, Suderman; Koziuk, Janice; Kruczkiewicz, Peter; Nguyen, Hoang Hai; Fisher, Mathew; Lung, Oliver; Berhane, Yohannes
EPI2236703	PA	Canada	2022-Jul-19	EPI_ISL_16023375	A/Skunk/AB/FAV-0897-03/2022	Alberta Agriculture and Forestry, Government of Alberta	Canadian Food Inspection Agency	Alkie, Tamiru; Hicks, Mark; Pybuse, Margo J; Xu, Wanhong; Hisanaga, Tamiko; Suderman, Suderman; Koziuk, Janice; Kruczkiewicz, Peter; Nguyen, Hoang Hai; Fisher, Mathew; Lung, Oliver; Berhane, Yohannes
EPI2236695	PA	Canada	2022-Jul-19	EPI_ISL_16023374	A/Skunk/AB/FAV-0897-02/2022	Alberta Agriculture and Forestry, Government of Alberta	Canadian Food Inspection Agency	Alkie, Tamiru; Hicks, Mark; Pybuse, Margo J; Xu, Wanhong; Hisanaga, Tamiko; Suderman, Suderman; Koziuk, Janice; Kruczkiewicz, Peter; Nguyen, Hoang Hai; Fisher, Mathew; Lung, Oliver; Berhane, Yohannes
EPI2236687	PA	Canada	2022-Jun-28	EPI_ISL_16023372	A/Skunk/AB/FAV-0897-01/2022	Alberta Agriculture and Forestry, Government of Alberta	Canadian Food Inspection Agency	Alkie, Tamiru; Hicks, Mark; Pybuse, Margo J; Xu, Wanhong; Hisanaga, Tamiko; Suderman, Suderman; Koziuk, Janice; Kruczkiewicz, Peter; Nguyen, Hoang Hai; Fisher, Mathew; Lung, Oliver; Berhane, Yohannes
EPI2150623	PA	Sweden	2022-Jun-29	EPI_ISL_14810369	A/porpoise /Sweden/SVA220712SZ0367/FB002184/O-2022	Swedish Veterinary Agency (SVA)	Swedish Veterinary Agency (SVA)
EPI1958453	PA	Netherlands	2022-Jan-08	EPI_ISL_8799320	A/polecat/Netherlands/22000516-003/2022	Wageningen Bioveterinary Research	Wageningen Bioveterinary Research	Beerens, Nancy; Harders, Frank; Pritz-Verschuren, Sylvia; Roose, Marit; Venema, Sandra; Germeraad, Evelien; Engelsma, Marc; Heutink, Rene
EPI2296208	PA	Belgium	2022-Dec-08	EPI_ISL_16547666	A/Mustela_furo/Belgium/14312-0002/2022	Sciensano - Animal Infectious Diseases	Sciensano, Department of Animal Infectious Diseases	Van Borm, Steven; Roupie, Virginie; Hostyn, Pierre; Lambrecht, Benedicte; Steensels, Mieke
EPI2296196	PA	Belgium	2022-Dec-08	EPI_ISL_16547552	A/Mustela_furo/Belgium/14312-0001/2022	Sciensano - Animal Infectious Diseases	Sciensano, Department of Animal Infectious Diseases	Van Borm, Steven; Roupie, Virginie; Hostyn, Pierre; Lambrecht, Benedicte; Steensels, Mieke
EPI1995128	PA	Slovenia	2022-Jan-05	EPI_ISL_11007536	A/ferret/Slovenia/308MZ_22VIR777-9/2022	Beijing Genomics Institute (BGI)	Istituto Zooprofilattico Sperimentale delle Venezie	Slavec, B.; Ra?nik, J.; Krape?, U.; ?labravec, Z.; A?ko, J.; Cociancich, V.; Paller, T.; Vidrih, ?.; Rojs, O.Z.; Arseniev, S.; Groza, O.; Barbierato, G.; Zecchin, B.; Fusaro, A.; Schivo, A.; Salviato, A.; Palumbo, E.; Giussani, E.; Monne, I.; Terregino, C.
EPI2611371	PA	Poland	2023-Jun-21	EPI_ISL_17956379	A/domestic_cat/Poland/H255-M/2023	National Veterinary Research Institut Poland, PIWet-PIB	National Veterinary Research Institut Poland, PIWet-PIB	Edyta,≈öwiƒôto≈Ñ; Katarzyna,Doma≈Ñska-Blicharz; Aleksandra,Giza; Marta,Pietruk; Karolina,Tarasiuk; Krzysztof,Wyrostek; Natalia, Sty≈õ-Fijo≈Ç
EPI2610689	PA	Poland	2023-Jun-21	EPI_ISL_17949824	A/cat/Poland/Gda1/2023	University of Gdansk	University of Gdansk	Maciej,Grzybek; Tomasz,Lepionka; Krzysztof,Pyrc; Lukasz,Rabalski
EPI2837130	PB1	Finland	2023-Sep-20	EPI_ISL_18618768	A/mink/Finland/3079/2023	Finnish Food Authority	Finnish Food Authority	Kauppinen, Ari; Kareinen, Lauri; Tammiranta, Niina; Kantala, Tuija; Fusaro, Alice; Gadd, Tuija
EPI2837122	PB1	Finland	2023-Sep-20	EPI_ISL_18618767	A/mink/Finland/3078/2023	Finnish Food Authority	Finnish Food Authority	Kauppinen, Ari; Kareinen, Lauri; Tammiranta, Niina; Kantala, Tuija; Fusaro, Alice; Gadd, Tuija
EPI2837120	PB1	Finland	2023-Sep-20	EPI_ISL_18618766	A/mink/Finland/3081/2023	Finnish Food Authority	Finnish Food Authority	Kauppinen, Ari; Kareinen, Lauri; Tammiranta, Niina; Kantala, Tuija; Fusaro, Alice; Gadd, Tuija
EPI2837102	PB1	Finland	2023-Sep-20	EPI_ISL_18618701	A/mink/Finland/3076/2023	Finnish Food Authority	Finnish Food Authority	Kauppinen, Ari; Kareinen, Lauri; Tammiranta, Niina; Kantala, Tuija; Fusaro, Alice; Gadd, Tuija
EPI2837078	PB1	Finland	2023-Aug-05	EPI_ISL_18618377	A/mink/Finland/688/2023	Finnish Food Authority	Finnish Food Authority	Kauppinen, Ari; Kareinen, Lauri; Tammiranta, Niina; Kantala, Tuija; Fusaro, Alice; Gadd, Tuija
EPI2760292	PB1	Finland	2023-Jul-17	EPI_ISL_18321746	A/raccoon_dog/Finland/552_23VIR6928-5/2023	Finnish Food Authority	Istituto Zooprofilattico Sperimentale Delle Venezie	Gadd, T.; Tammiranta, N; Kantala, K.; Nokireki, T.; Pastori, A.; Zecchin, B.; Fusaro, A.; Schivo, A.; Salviato, A.; Palumbo, E.; Giussani, E.; Monne, I.; Terregino, C.
EPI2755520	PB1	Finland	2023-Aug-05	EPI_ISL_18292966	A/mink/Finland/710/2023	Finnish Food Authority	Finnish Food Authority	Kauppinen, Ari; Kareinen, Lauri; Tammiranta, Niina; Kantala, Tuija; Fusaro, Alice; Giussani, Edoardo; Gadd, Tuija
EPI2755512	PB1	Finland	2023-Aug-05	EPI_ISL_18292965	A/mink/Finland/709/2023	Finnish Food Authority	Finnish Food Authority	Kauppinen, Ari; Kareinen, Lauri; Tammiranta, Niina; Kantala, Tuija; Fusaro, Alice; Giussani, Edoardo; Gadd, Tuija
EPI2755417	PB1	Finland	2023-Jul-03	EPI_ISL_18292952	A/mink/Finland/506/2023	Finnish Food Authority	Finnish Food Authority	Kauppinen, Ari; Kareinen, Lauri; Tammiranta, Niina; Kantala, Tuija; Fusaro, Alice; Galiano, Monica; Ikonen, Niina; Lindh, Erika; Gadd, Tuija
EPI2536813	PB1	Netherlands	2022-Jan-16	EPI_ISL_17580930	A/Stone Marten/Netherlands/1/2022	Erasmus Medical Center	Erasmus Medical Center	Vuong,O;Thewessen, S;Bellido-Martin,A.B; Chestakova, I; Sikkema, R;Fouchier, R.A.M.
EPI2513413	PB1	Canada	2022-Dec-26	EPI_ISL_17494319	A/American crow/PEI/FAV-0019-01/2022	Atlantic Veterinary College, University of Prince Edward Island	Canadian Food Inspection Agency	Parma, L; Hisanaga, T; Xu, W; Alkie, T; Fisher, M; Lung, O; Yason, C; Jones, M; Berhane, Y
EPI2197222	PB1	Finland	2022-Feb-01	EPI_ISL_15518269	A/lynx/Finland/Vi209-22_22VIR3127-2/2022	Finnish Food Authority	Istituto Zooprofilattico Sperimentale Delle Venezie	Tammiranta, N.;Kantala, T.;Laamanen, I.;Gadd, T.;Zecchin, B.;Fusaro, A.;Schivo, A.;Salviato, A.;Palumbo, E.;Milani, A.;Giussani, E.;Pastori, A.;Monne, I.;Terregino, C.
EPI1987256	PB1	Netherlands	2022-Feb-13	EPI_ISL_10220432	A/badger/Netherlands/22003078-004/2022	Wageningen Bioveterinary Research	Wageningen Bioveterinary Research	Beerens, Nancy; Harders, Frank; Pritz-Verschuren, Sylvia; Roose, Marit; Venema, Sandra; Germeraad, Evelien; Engelsma, Marc; Heutink, Rene
EPI1987232	PB1	Netherlands	2022-Feb-09	EPI_ISL_10220429	A/polecat/Netherlands/22002792-005/2022	Wageningen Bioveterinary Research	Wageningen Bioveterinary Research	Beerens, Nancy; Harders, Frank; Pritz-Verschuren, Sylvia; Roose, Marit; Venema, Sandra; Germeraad, Evelien; Engelsma, Marc; Heutink, Rene
EPI1981002	PB1	Netherlands	2022-Jan-24	EPI_ISL_9616266	A/polecat/Netherlands/22002047-001/2022	Wageningen Bioveterinary Research	Wageningen Bioveterinary Research	Beerens, Nancy; Harders, Frank; Pritz-Verschuren, Sylvia; Roose, Marit; Venema, Sandra; Germeraad, Evelien; Engelsma, Marc; Heutink, Rene
EPI2780159	PB1	Korea, Republic of	2023-Jul-04	EPI_ISL_18102701	A/feline/South Korea/SNU-02/2023			K,Lee; M,Yeom; T,Vu; Q,Do; W,NA; M,Lee; D,Jeong; D,Cheon; D,Song
EPI2780152	PB1	Korea, Republic of	2023-Jul-04	EPI_ISL_18102700	A/feline/South Korea/SNU-01/2023			K,Lee; M,Yeom; T,Vu; Q,Do; W,NA; M,Lee; D,Jeong; D,Cheon; D,Song
EPI2652228	PB1	Poland	2023-Jun-17	EPI_ISL_18033408	A/caracal/Poland/H303-P/2023	National Veterinary Research Institut Poland, PIWet-PIB	National Veterinary Research Institut Poland, PIWet-PIB	Swieton,Edyta;Tarasiuk,Karolina;Wyrostek,Krzysztof;Stys-Fijol,Natalia;Domanska-Blicharz,Katarzyna
EPI2597246	PB1	Peru	2023-Feb-08	EPI_ISL_17805999	A/lion/Peru/AIS0554/2023			Cruz,C.D., Conza,L.B., Espejo,V., Troncos,G., Perez,D.R., Marcelo,O.L., Schilling,M.; Tinoco,Y.
EPI3260239	PB1	United States	2024-Apr-01	EPI_ISL_19094506	A/mountain lion/Montana/24_010315-001/2024	United States Department of Agriculture, Agricultural Research Service, National Animal Disease Center	United States Department of Agriculture, Agricultural Research Service, National Animal Disease Center	T.,Nguyen; C.,Hutter; A.,Markin; M.,Thomas; K.,Lantz; M.L.,Killian; G.M.,Janzen; S.,Vijendran; S.,Wagle; B.,Inderski; D.R.,Magstadt; G.,Li; D.G.,Diel; E.A.,Frye; K.M.,Dimitrov; A.K.,Swinford; A.C.,Thompson; K.R.,Snevik; D.L.,Suarez; E.,Spackman; S.M.,Lakin; S.,C; K.R.,Johnson; A.L.,Baker; Robbe-S.,Austerman; M.K.,Torchetti; Anderson,T.K.
EPI3260222	PB1	United States	2024-Mar-11	EPI_ISL_19094504	A/skunk/Montana/24_007939-001/2024	United States Department of Agriculture, Agricultural Research Service, National Animal Disease Center	United States Department of Agriculture, Agricultural Research Service, National Animal Disease Center	T.,Nguyen; C.,Hutter; A.,Markin; M.,Thomas; K.,Lantz; M.L.,Killian; G.M.,Janzen; S.,Vijendran; S.,Wagle; B.,Inderski; D.R.,Magstadt; G.,Li; D.G.,Diel; E.A.,Frye; K.M.,Dimitrov; A.K.,Swinford; A.C.,Thompson; K.R.,Snevik; D.L.,Suarez; E.,Spackman; S.M.,Lakin; S.,C; K.R.,Johnson; A.L.,Baker; Robbe-S.,Austerman; M.K.,Torchetti; Anderson,T.K.
EPI3260198	PB1	United States	2024-Feb-23	EPI_ISL_19094501	A/skunk/Washington/24_005959-001/2024	United States Department of Agriculture, Agricultural Research Service, National Animal Disease Center	United States Department of Agriculture, Agricultural Research Service, National Animal Disease Center	T.,Nguyen; C.,Hutter; A.,Markin; M.,Thomas; K.,Lantz; M.L.,Killian; G.M.,Janzen; S.,Vijendran; S.,Wagle; B.,Inderski; D.R.,Magstadt; G.,Li; D.G.,Diel; E.A.,Frye; K.M.,Dimitrov; A.K.,Swinford; A.C.,Thompson; K.R.,Snevik; D.L.,Suarez; E.,Spackman; S.M.,Lakin; S.,C; K.R.,Johnson; A.L.,Baker; Robbe-S.,Austerman; M.K.,Torchetti; Anderson,T.K.
EPI3260190	PB1	United States	2024-Feb-23	EPI_ISL_19094500	A/skunk/Washington/24_005959-002/2024	United States Department of Agriculture, Agricultural Research Service, National Animal Disease Center	United States Department of Agriculture, Agricultural Research Service, National Animal Disease Center	T.,Nguyen; C.,Hutter; A.,Markin; M.,Thomas; K.,Lantz; M.L.,Killian; G.M.,Janzen; S.,Vijendran; S.,Wagle; B.,Inderski; D.R.,Magstadt; G.,Li; D.G.,Diel; E.A.,Frye; K.M.,Dimitrov; A.K.,Swinford; A.C.,Thompson; K.R.,Snevik; D.L.,Suarez; E.,Spackman; S.M.,Lakin; S.,C; K.R.,Johnson; A.L.,Baker; Robbe-S.,Austerman; M.K.,Torchetti; Anderson,T.K.
EPI3260182	PB1	United States	2024-Feb-23	EPI_ISL_19094499	A/skunk/Washington/24_005959-003/2024	United States Department of Agriculture, Agricultural Research Service, National Animal Disease Center	United States Department of Agriculture, Agricultural Research Service, National Animal Disease Center	T.,Nguyen; C.,Hutter; A.,Markin; M.,Thomas; K.,Lantz; M.L.,Killian; G.M.,Janzen; S.,Vijendran; S.,Wagle; B.,Inderski; D.R.,Magstadt; G.,Li; D.G.,Diel; E.A.,Frye; K.M.,Dimitrov; A.K.,Swinford; A.C.,Thompson; K.R.,Snevik; D.L.,Suarez; E.,Spackman; S.M.,Lakin; S.,C; K.R.,Johnson; A.L.,Baker; Robbe-S.,Austerman; M.K.,Torchetti; Anderson,T.K.
EPI3259738	PB1	United States	2024-Mar-19	EPI_ISL_19094443	A/feline/Montana/24-009038-001/2024	National Veterinary Services Laboratories - USDA	National Veterinary Services Laboratories - USDA	Aufderhar,Matthew;Franzen,Kerrie;Killian,Mary;Lantz,Kristina;Stuber,Tod;Hicks,Jessica;Norris,Cameron
EPI3158798	PB1	United States	2024-Feb-23	EPI_ISL_19014400	A/skunk/New Mexico/24-006483-001/2024	National Veterinary Services Laboratories - USDA	National Veterinary Services Laboratories - USDA	Aufderhar,Matthew;Franzen,Kerrie;Love,Emily;Killian,Mary;Lantz,Kristina;Stuber,Tod;Hicks,Jessica;Norris,Cameron
EPI2906703	PB1	France	2022-Nov-01	EPI_ISL_18750109	A/tibetan blue bear/France/CHUT-0007R2/2022	Centre Hospitalier Universitaire de Toulouse	Centre Hospitalier Universitaire de Toulouse	Bessiere,P., Gaide,N., Crispo,M., Dirat,M., Croville,G., Le Loc'h,G.; Guerin,J.-L.
EPI2895493	PB1	United States	2023-Aug-19	EPI_ISL_18737559	A/harbor seal/Washington/23-025744-002/2023	National Veterinary Services Laboratories - USDA	National Veterinary Services Laboratories - USDA	Franzen,Kerrie;Love,Emily;Ozella,Mikaela;Killian,Mary;Lantz,Kristina;Stuber,Tod;Hicks,Jessica;Norris,Cameron
EPI2895021	PB1	United States	2023-Aug-13	EPI_ISL_18731638	A/harbor seal/Washington/23-027069-002/2023	National Veterinary Services Laboratories - USDA	National Veterinary Services Laboratories - USDA	Franzen,Kerrie;Love,Emily;Ozella,Mikaela;Killian,Mary;Lantz,Kristina;Stuber,Tod;Hicks,Jessica;Norris,Cameron
EPI2894997	PB1	United States	2023-Aug-25	EPI_ISL_18731622	A/harbor seal/Washington/23-025991-001/2023	National Veterinary Services Laboratories - USDA	National Veterinary Services Laboratories - USDA	Franzen,Kerrie;Love,Emily;Ozella,Mikaela;Killian,Mary;Lantz,Kristina;Stuber,Tod;Hicks,Jessica;Norris,Cameron
EPI2894989	PB1	United States	2023-Aug-29	EPI_ISL_18731621	A/harbor seal/Washington/23-026504-002/2023	National Veterinary Services Laboratories - USDA	National Veterinary Services Laboratories - USDA	Franzen,Kerrie;Love,Emily;Ozella,Mikaela;Killian,Mary;Lantz,Kristina;Stuber,Tod;Hicks,Jessica;Norris,Cameron
EPI2894981	PB1	United States	2023-Aug-29	EPI_ISL_18731620	A/harbor seal/Washington/23-026504-001/2023	National Veterinary Services Laboratories - USDA	National Veterinary Services Laboratories - USDA	Franzen,Kerrie;Love,Emily;Ozella,Mikaela;Killian,Mary;Lantz,Kristina;Stuber,Tod;Hicks,Jessica;Norris,Cameron
EPI2856653	PB1	Canada	2023-Apr-20	EPI_ISL_18665592	A/Striped_Skunk/BC/AIVPHL-1083/2023	B.C. Centre for Disease Control	Public Health Agency of Canada	Himsworth, Chelsea; Prystajecky,Natalie; Tyson,John; Jassem,Agatha; Kuchinski,Kevin; Coombe, Michelle; Lee,Tracy; Azana,Rob; Fung,Janet; Chan,Michael; Cheung,Branco; Caleta,Jessica; Tsang,Frankie; Yang,Kevin; Russell,Shannon; Zlosnik,James; Hoang,Linda
EPI2856629	PB1	Canada	2023-Apr-20	EPI_ISL_18665588	A/Striped_Skunk/BC/AIVPHL-1082/2023	B.C. Centre for Disease Control	Public Health Agency of Canada	Himsworth, Chelsea; Prystajecky,Natalie; Tyson,John; Jassem,Agatha; Kuchinski,Kevin; Coombe, Michelle; Lee,Tracy; Azana,Rob; Fung,Janet; Chan,Michael; Cheung,Branco; Caleta,Jessica; Tsang,Frankie; Yang,Kevin; Russell,Shannon; Zlosnik,James; Hoang,Linda
EPI2856230	PB1	Canada	2023-Mar-09	EPI_ISL_18665535	A/Striped_Skunk/BC/AIVPHL-977/2023	B.C. Centre for Disease Control	Public Health Agency of Canada	Himsworth, Chelsea; Prystajecky,Natalie; Tyson,John; Jassem,Agatha; Kuchinski,Kevin; Coombe, Michelle; Lee,Tracy; Azana,Rob; Fung,Janet; Chan,Michael; Cheung,Branco; Caleta,Jessica; Tsang,Frankie; Yang,Kevin; Russell,Shannon; Zlosnik,James; Hoang,Linda
EPI2856206	PB1	Canada	2023-Mar-09	EPI_ISL_18665532	A/Striped_Skunk/BC/AIVPHL-976/2023	B.C. Centre for Disease Control	Public Health Agency of Canada	Himsworth, Chelsea; Prystajecky,Natalie; Tyson,John; Jassem,Agatha; Kuchinski,Kevin; Coombe, Michelle; Lee,Tracy; Azana,Rob; Fung,Janet; Chan,Michael; Cheung,Branco; Caleta,Jessica; Tsang,Frankie; Yang,Kevin; Russell,Shannon; Zlosnik,James; Hoang,Linda
EPI2816118	PB1	Denmark	2023-Apr-29	EPI_ISL_18594303	A_red_fox_Denmark_08303-1.01_2023-04-29	Statens Serumm Institute	Statens Serum Institute	Hjulsager,C;Liang,Y
EPI2512573	PB1	Canada	2022-Jun-14	EPI_ISL_17478645	A/Black Bear/QC/FAV-0902/2022	Laboratoire de sant√© animale Minist√®re de l'Agriculture, des P√™cheries et de l'A	Canadian Food Inspection Agency	Koziuk, J; Hisanaga, T; Xu, W; Alkie, T; Lung, O; Fisher, M; Nadeau, M.S; Lair, S; Berhane, Y
EPI2512504	PB1	Canada	2022-Jun-24	EPI_ISL_17478584	A/Black Bear/QC/FAV-0935/2022	Laboratoire de sant√© animale Minist√®re de l'Agriculture, des P√™cheries et de l'A	Canadian Food Inspection Agency	Koziuk, J; Hisanaga, T; Xu, W; Alkie, T; Lung, O; Fisher, M; Nadeau, M.S; Lair, S; Berhane, Y
EPI2509905	PB1	United Kingdom	2022-Jun-19	EPI_ISL_17465835	A/harbour_seal/Scotland/054948/2022	Animal and Plant Health Agency (APHA)	Animal and Plant Health Agency (APHA)
EPI2509897	PB1	United Kingdom	2023-Feb-20	EPI_ISL_17465834	A/common_dolphin/England/040499/2023	Animal and Plant Health Agency (APHA)	Animal and Plant Health Agency (APHA)
EPI2509889	PB1	United Kingdom	2023-Feb-20	EPI_ISL_17465833	A/common_dolphin/Wales/040498/2023	Animal and Plant Health Agency (APHA)	Animal and Plant Health Agency (APHA)
EPI2509881	PB1	United Kingdom	2023-Feb-06	EPI_ISL_17465832	A/harbour_porpoise/England/040497/2023	Animal and Plant Health Agency (APHA)	Animal and Plant Health Agency (APHA)
EPI2507009	PB1	United States	2023-Jan-27	EPI_ISL_17424646	A/striped skunk/Kansas/W23-094/2023	St. Jude Center of Excellence for Influenza Research and Response - CEIRR Influenza Data Processing and Communication Center	St. Jude Center of Excellence for Influenza Research and Response - CEIRR Influenza Data Processing and Communication Center	Poulson,R., Stallknecht,D., Rubrum,A., Jeevan,T., Walker,D. and Webby,R.
EPI2506857	PB1	United States	2022-Jul-07	EPI_ISL_17424627	A/harbor seal/Maine/MME-185-ns/2022			Fauquier,D.; Doughty,L.A.; Rubrum,A.; Jeevan,T.; Walker,D.; Webby,R.
EPI2506849	PB1	United States	2022-Jun-24	EPI_ISL_17424626	A/harbor seal/Maine/MME-117-ns/2022			Fauquier,D.; Doughty,L.A.; Rubrum,A.; Jeevan,T.; Walker,D.; Webby,R.
EPI2506841	PB1	United States	2022-Jul-02	EPI_ISL_17424625	A/harbor seal/Maine/MME-150-L/2022			Fauquier,D.; Doughty,L.A.; Rubrum,A.; Jeevan,T.; Walker,D.; Webby,R.
EPI2506833	PB1	United States	2022-Jul-07	EPI_ISL_17424624	A/harbor seal/Maine/MME-185-L/2022	St. Jude Center of Excellence for Influenza Research and Response - CEIRR Influenza Data Processing and Communication Center	St. Jude Center of Excellence for Influenza Research and Response - CEIRR Influenza Data Processing and Communication Center	Fauquier,D., Doughty,L.A., Rubrum,A., Jeevan,T., Walker,D. and Webby,R.
EPI2506825	PB1	United States	2022-Jul-02	EPI_ISL_17424623	A/harbor seal/Maine/MME-150-ns/2022			Fauquier,D.; Doughty,L.A.; Rubrum,A.; Jeevan,T.; Walker,D.; Webby,R.
EPI2506817	PB1	United States	2022-Jul-02	EPI_ISL_17424622	A/harbor seal/Maine/MME-147-L/2022	St. Jude Center of Excellence for Influenza Research and Response - CEIRR Influenza Data Processing and Communication Center	St. Jude Center of Excellence for Influenza Research and Response - CEIRR Influenza Data Processing and Communication Center	Fauquier,D., Doughty,L.A., Rubrum,A., Jeevan,T., Walker,D. and Webby,R.
EPI2473782	PB1	United States	2022-Jul-22	EPI_ISL_17260689	A/skunk/Idaho/22-023547-001/2022	National Veterinary Services Laboratories - USDA	National Veterinary Services Laboratories - USDA	Chinh,Thanh;Franzen,Kerrie;Love,Emily;Killian,Mary;Koster,Leo;Lantz,Kristina;Stuber,Tod;Hicks,Jessica;Norris,Cameron
EPI2473774	PB1	United States	2022-Jul-06	EPI_ISL_17260688	A/raccoon/Michigan/22-021733-010/2022	National Veterinary Services Laboratories - USDA	National Veterinary Services Laboratories - USDA	Chinh,Thanh;Franzen,Kerrie;Love,Emily;Killian,Mary;Koster,Leo;Lantz,Kristina;Stuber,Tod;Hicks,Jessica;Norris,Cameron
EPI2473699	PB1	United States	2022-Apr-14	EPI_ISL_17260683	A/fisher/Wisconsin/22-019946-001/2022	National Veterinary Services Laboratories - USDA	National Veterinary Services Laboratories - USDA	Chinh,Thanh;Franzen,Kerrie;Love,Emily;Killian,Mary;Koster,Leo;Lantz,Kristina;Stuber,Tod;Hicks,Jessica;Norris,Cameron
EPI2473685	PB1	United States	2022-Jun-07	EPI_ISL_17260682	A/skunk/Washington/22-019274-004/2022	National Veterinary Services Laboratories - USDA	National Veterinary Services Laboratories - USDA	Chinh,Thanh;Franzen,Kerrie;Love,Emily;Killian,Mary;Koster,Leo;Lantz,Kristina;Stuber,Tod;Hicks,Jessica;Norris,Cameron
EPI2473657	PB1	United States	2022-Jun-06	EPI_ISL_17260680	A/skunk/Idaho/22-018976-004/2022	National Veterinary Services Laboratories - USDA	National Veterinary Services Laboratories - USDA	Chinh,Thanh;Franzen,Kerrie;Love,Emily;Killian,Mary;Koster,Leo;Lantz,Kristina;Stuber,Tod;Hicks,Jessica;Norris,Cameron
EPI2473587	PB1	United States	2022-May-03	EPI_ISL_17260675	A/coyote/Michigan/22-017507-005/2022	National Veterinary Services Laboratories - USDA	National Veterinary Services Laboratories - USDA	Chinh,Thanh;Franzen,Kerrie;Love,Emily;Killian,Mary;Koster,Leo;Lantz,Kristina;Stuber,Tod;Hicks,Jessica;Norris,Cameron
EPI2473531	PB1	United States	2022-May-25	EPI_ISL_17260671	A/Virginia opossum/Iowa/22-016780-003/2022	National Veterinary Services Laboratories - USDA	National Veterinary Services Laboratories - USDA	Chinh,Thanh;Franzen,Kerrie;Love,Emily;Killian,Mary;Koster,Leo;Lantz,Kristina;Stuber,Tod;Hicks,Jessica;Norris,Cameron
EPI2469495	PB1	Belgium	2023-Mar-02	EPI_ISL_17246921	A/Mustela_putorius/Belgium/01922_0001/2023	Sciensano - Animal Infectious Diseases	Sciensano, Department of Animal Infectious Diseases	Van Borm, Steven; Roupie, Virginie; Hostyn, Pierre; Mathijs, Elisabeth; Lambrecht, Benedicte; Steensels, Mieke
EPI2274964	PB1	Canada	2022-May-30	EPI_ISL_16367971	A/Striped Skunk/SK/FAV-0824-01/2022	Western College of Veterinary Medicine, University of Saskatchewan	Canadian Food Inspection Agency
EPI2260732	PB1	United States	2022-Jan-01	EPI_ISL_16271848	A/black bear/Alaska/22-036396-001/2022	National Veterinary Services Laboratories - USDA	National Veterinary Services Laboratories - USDA	Chinh,Thanh;Love, Emily;Franzen,Kerrie;Killian,Mary;Koster,Leo;Lantz,Kristina;Stuber,Tod;Hicks,Jessica
EPI2260628	PB1	United States	2022-Nov-04	EPI_ISL_16271835	A/striped skunk/Idaho/22-037165-002/2022	National Veterinary Services Laboratories - USDA	National Veterinary Services Laboratories - USDA	Chinh,Thanh;Love, Emily;Franzen,Kerrie;Killian,Mary;Koster,Leo;Lantz,Kristina;Stuber,Tod;Hicks,Jessica
EPI2257434	PB1	United States	2022-Mar-30	EPI_ISL_16212269	A/bottlenose dolphin/Florida/UFTt2203/2022			Murawski,A.; Allison,A.; Ossiboff,R.; Fabrizio,T.; Jeevan,T.; Mukherjee,N.; Killian,M.L.; Torchetti,M.; Walsh,M.; Webby,R.
EPI2235582	PB1	Canada	2022-May-18	EPI_ISL_16003268	A/Skunk/MB/FAV-470/2022	Manitoba Agriculture	Canadian Food Inspection Agency	Alkie, Tamiru; Cox, Sherri; Pople, Neil; Xu, Wanhong; Hisanaga, Tamiko; Suderman, Suderman; Koziuk, Janice; Kruczkiewicz, Peter; Nguyen, Hoang Hai; Fisher, Mathew; Lung, Oliver; Berhane, Yohannes
EPI2182141	PB1	United States	2022-Mar-30	EPI_ISL_15078255	A/dolphin/Florida/22-025319-002/2022	National Veterinary Services Laboratories - USDA	National Veterinary Services Laboratories - USDA	Chinh,Thanh;Love, Emily;Franzen,Kerrie;Killian,Mary;Koster,Leo;Lantz,Kristina;Stuber,Tod;Hicks,Jessica
EPI2182133	PB1	United States	2022-Jun-07	EPI_ISL_15078254	A/skunk/Washington/22-019274-001/2022	National Veterinary Services Laboratories - USDA	National Veterinary Services Laboratories - USDA	Chinh,Thanh;Love, Emily;Franzen,Kerrie;Killian,Mary;Koster,Leo;Lantz,Kristina;Stuber,Tod;Hicks,Jessica
EPI2182117	PB1	United States	2022-Jun-08	EPI_ISL_15078252	A/raccoon/Washington/22-018406-002/2022	National Veterinary Services Laboratories - USDA	National Veterinary Services Laboratories - USDA	Chinh,Thanh;Love, Emily;Franzen,Kerrie;Killian,Mary;Koster,Leo;Lantz,Kristina;Stuber,Tod;Hicks,Jessica
EPI2182101	PB1	United States	2022-May-25	EPI_ISL_15078250	A/Virginia opossum/Iowa/22-016780-001/2022	National Veterinary Services Laboratories - USDA	National Veterinary Services Laboratories - USDA	Chinh,Thanh;Love, Emily;Franzen,Kerrie;Killian,Mary;Koster,Leo;Lantz,Kristina;Stuber,Tod;Hicks,Jessica
EPI2182085	PB1	United States	2022-May-24	EPI_ISL_15078248	A/bobcat/Wisconsin/22-016051-001/2022	National Veterinary Services Laboratories - USDA	National Veterinary Services Laboratories - USDA	Chinh,Thanh;Love, Emily;Franzen,Kerrie;Killian,Mary;Koster,Leo;Lantz,Kristina;Stuber,Tod;Hicks,Jessica
EPI2181750	PB1	United States	2022-Mar-30	EPI_ISL_15069397	A/bottlenose dolphin/Florida/UFTt2203/2022	University of Florida, College of Veterinary Medicine	St. Jude Children's Research Hospital	Murawski, Allison; Allison, Andrew; Ossiboff, Robert; Fabrizio, Thomas; Jeevan, Trushar; Killian, Mary Lea; Torchetti, Mia; Walsh, Michael; Webby, Richard
EPI2158646	PB1	United Kingdom	2022-Jan-01	EPI_ISL_14864642	A/otter/Scotland/M100366/2022	Animal and Plant Health Agency (APHA)	Animal and Plant Health Agency (APHA)
EPI2158638	PB1	United Kingdom	2022-Jan-01	EPI_ISL_14864641	A/otter/Scotland/M100839/2022	Animal and Plant Health Agency (APHA)	Animal and Plant Health Agency (APHA)
EPI2109941	PB1	Japan	2022-Apr-01	EPI_ISL_14070455	A/tanuki/Hokkaido/1/2022	Graduate School of Veterinary Medicine, Hokkaido University	Graduate School of Veterinary Medicine, Hokkaido University	Yoshihiro, Sakoda; Takahiro, Hiono; Norikazu, Isoda
EPI2557217	PB1	Netherlands	2023-Jan-01	EPI_ISL_17672782	A/grey seal/Netherlands/302603/2023	Tier√§rztliche Hochschule Hannover	Friedrich-Loeffler-Institut
EPI2557209	PB1	Netherlands	2023-Jan-01	EPI_ISL_17672781	A/grey seal/Netherlands/302579/2023	Tier√§rztliche Hochschule Hannover	Friedrich-Loeffler-Institut
EPI2398401	PB1	United Kingdom	2022-Mar-12	EPI_ISL_16904553	A/Harbour_Seal/Scotland/162919/2022	Animal and Plant Health Agency (APHA)	Animal and Plant Health Agency (APHA)
EPI2310442	PB1	United States	2022-Jul-15	EPI_ISL_16632542	A/harbor seal/Maine/22-025072-002/2022	Cummings School of Veterinary Medicine at Tufts University	Cummings School of Veterinary Medicine at Tufts University	Chinh,Thanh; Franzen,Kerrie; Love,Emily; Killian,Mary; Lantz,Kristina; Hicks,Jessica; Norris, Cameron; Stuber,Tod; Sawatzki, Kaitlin; Puryear, Wendy; Foss, Alexa; Doughty,Linda; Runstadler, Jonathan
EPI2310434	PB1	United States	2022-Jul-09	EPI_ISL_16632541	A/harbor seal/Maine/22-022528-008/2022	Cummings School of Veterinary Medicine at Tufts University	Cummings School of Veterinary Medicine at Tufts University	Chinh,Thanh; Franzen,Kerrie; Love,Emily; Killian,Mary; Lantz,Kristina; Hicks,Jessica; Norris, Cameron; Stuber,Tod; Sawatzki, Kaitlin; Puryear, Wendy; Foss, Alexa; Doughty,Linda; Runstadler, Jonathan
EPI2310426	PB1	United States	2022-Jul-09	EPI_ISL_16632540	A/harbor seal/Maine/22-022528-006/2022	Cummings School of Veterinary Medicine at Tufts University	Cummings School of Veterinary Medicine at Tufts University	Chinh,Thanh; Franzen,Kerrie; Love,Emily; Killian,Mary; Lantz,Kristina; Hicks,Jessica; Norris, Cameron; Stuber,Tod; Sawatzki, Kaitlin; Puryear, Wendy; Foss, Alexa; Doughty,Linda; Runstadler, Jonathan
EPI2310418	PB1	United States	2022-Jul-08	EPI_ISL_16632539	A/harbor seal/Maine/22-022528-003/2022	Cummings School of Veterinary Medicine at Tufts University	Cummings School of Veterinary Medicine at Tufts University	Chinh,Thanh; Franzen,Kerrie; Love,Emily; Killian,Mary; Lantz,Kristina; Hicks,Jessica; Norris, Cameron; Stuber,Tod; Sawatzki, Kaitlin; Puryear, Wendy; Foss, Alexa; Doughty,Linda; Runstadler, Jonathan
EPI2110523	PB1	United States	2022-Jun-29	EPI_ISL_14098924	A/harbor seal/Maine/22-020983-007/2022	National Veterinary Services Laboratories - USDA	National Veterinary Services Laboratories - USDA	Chinh,Thanh;Franzen,Kerrie;Love, Emily;Killian,Mary;Koster,Leo;Lantz,Kristina;Torchetti,Mia;Stuber,Tod;Hicks,Jessica
EPI2110515	PB1	United States	2022-Jun-29	EPI_ISL_14098923	A/harbor seal/Maine/22-020983-006/2022	National Veterinary Services Laboratories - USDA	National Veterinary Services Laboratories - USDA	Chinh,Thanh;Franzen,Kerrie;Love, Emily;Killian,Mary;Koster,Leo;Lantz,Kristina;Torchetti,Mia;Stuber,Tod;Hicks,Jessica
EPI2110507	PB1	United States	2022-Jun-29	EPI_ISL_14098922	A/grey seal/Maine/22-020983-003/2022	National Veterinary Services Laboratories - USDA	National Veterinary Services Laboratories - USDA	Chinh,Thanh;Franzen,Kerrie;Love, Emily;Killian,Mary;Koster,Leo;Lantz,Kristina;Torchetti,Mia;Stuber,Tod;Hicks,Jessica
EPI2110499	PB1	United States	2022-Jun-29	EPI_ISL_14098921	A/harbor seal/Maine/22-020983-002/2022	National Veterinary Services Laboratories - USDA	National Veterinary Services Laboratories - USDA	Chinh,Thanh;Franzen,Kerrie;Love, Emily;Killian,Mary;Koster,Leo;Lantz,Kristina;Torchetti,Mia;Stuber,Tod;Hicks,Jessica
EPI2110491	PB1	United States	2022-Jun-29	EPI_ISL_14098920	A/harbor seal/Maine/22-020983-001/2022	National Veterinary Services Laboratories - USDA	National Veterinary Services Laboratories - USDA	Chinh,Thanh;Franzen,Kerrie;Love, Emily;Killian,Mary;Koster,Leo;Lantz,Kristina;Torchetti,Mia;Stuber,Tod;Hicks,Jessica
EPI2110483	PB1	United States	2022-Jun-27	EPI_ISL_14098919	A/harbor seal/Maine/22-020455-005/2022	National Veterinary Services Laboratories - USDA	National Veterinary Services Laboratories - USDA	Chinh,Thanh;Franzen,Kerrie;Love, Emily;Killian,Mary;Koster,Leo;Lantz,Kristina;Torchetti,Mia;Stuber,Tod;Hicks,Jessica
EPI2110475	PB1	United States	2022-Jun-26	EPI_ISL_14098918	A/harbor seal/Maine/22-020455-004/2022	National Veterinary Services Laboratories - USDA	National Veterinary Services Laboratories - USDA	Chinh,Thanh;Franzen,Kerrie;Love, Emily;Killian,Mary;Koster,Leo;Lantz,Kristina;Torchetti,Mia;Stuber,Tod;Hicks,Jessica
EPI2110467	PB1	United States	2022-Jun-22	EPI_ISL_14098917	A/harbor seal/Maine/22-020455-003/2022	National Veterinary Services Laboratories - USDA	National Veterinary Services Laboratories - USDA	Chinh,Thanh;Franzen,Kerrie;Love, Emily;Killian,Mary;Koster,Leo;Lantz,Kristina;Torchetti,Mia;Stuber,Tod;Hicks,Jessica
EPI2110459	PB1	United States	2022-Jun-24	EPI_ISL_14098916	A/harbor seal/Maine/22-020455-002/2022	National Veterinary Services Laboratories - USDA	National Veterinary Services Laboratories - USDA	Chinh,Thanh;Franzen,Kerrie;Love, Emily;Killian,Mary;Koster,Leo;Lantz,Kristina;Torchetti,Mia;Stuber,Tod;Hicks,Jessica
EPI2110451	PB1	United States	2022-Jun-24	EPI_ISL_14098915	A/harbor seal/Maine/22-020455-001/2022	National Veterinary Services Laboratories - USDA	National Veterinary Services Laboratories - USDA	Chinh,Thanh;Franzen,Kerrie;Love, Emily;Killian,Mary;Koster,Leo;Lantz,Kristina;Torchetti,Mia;Stuber,Tod;Hicks,Jessica
EPI2641358	PB1	Finland	2023-Jul-10	EPI_ISL_18011099	A/mink/Finland/512-23/2023	Finnish Food Authority	Finnish Institute for Health and Welfare, THL	Tuija,Kantala; Alice,Fusaro; Tuija,Gadd; Monica,Galiano; Niina,Ikonen; Lauri,Kareinen; Ari,Kauppinen; Erika,Lindh
EPI2291516	PB1	Spain	2022-Oct-26	EPI_ISL_16507096	A/mink/Spain/22VIR12774-14_3869-3/2022	Istituto Zooprofilattico Sperimentale delle Venezie, EU/OIE/Reference Laboratory and FAO Reference Centre for AI and ND	Istituto Zooprofilattico Sperimentale Delle Venezie	Ruano,M.J.; Rocha,A.; Sanchez,A.; Aguero,M.; Pastori, A.; Zecchin, B.; Fusaro, A.; Schivo, A.; Salviato, A.; Palumbo, E.; Giussani, E.; Monne, I.; Terregino, C.
EPI2236190	PB1	Canada	2022-May-19	EPI_ISL_16013982	A/Wild Mink/ON/FAV-0529-01/2022	Ontario Veterinary College, University of Guelph	Canadian Food Inspection Agency	Alkie, Tamiru; Cox, Sherri; Ojkic, Davor; Stevens, Brian; Xu, Wanhong; Hisanaga, Tamiko; Suderman, Suderman; Koziuk, Janice; Kruczkiewicz, Peter; Nguyen, Hoang Hai; Fisher, Mathew; Lung, Oliver; Berhane, Yohannes
EPI2220619	PB1	Spain	2022-Oct-18	EPI_ISL_15878542	A/Mink/Spain/3691-3_22VIR10586-9/2022	Laboratorio Central de Veterinaria	Istituto Zooprofilattico Sperimentale delle Venezie	Ruano, M.J.; Rocha, A.; Sanchez, A.; Aguero, M; Barbierato, G.; Zecchin, B.; Fusaro, A.; Schivo, A.; Salviato, A.; Palumbo, E.; Giussani, E.; Pastori, A.; Monne, I.; Terregino, C.
EPI2220611	PB1	Spain	2022-Oct-18	EPI_ISL_15878541	A/Mink/Spain/3691-2_22VIR10586-8/2022	Laboratorio Central de Veterinaria	Istituto Zooprofilattico Sperimentale delle Venezie	Ruano, M.J.; Rocha, A.; Sanchez, A.; Aguero, M; Barbierato, G.; Zecchin, B.; Fusaro, A.; Schivo, A.; Salviato, A.; Palumbo, E.; Giussani, E.; Pastori, A.; Monne, I.; Terregino, C.
EPI2220603	PB1	Spain	2022-Oct-18	EPI_ISL_15878540	A/Mink/Spain/3691-10_22VIR10586-11/2022	Laboratorio Central de Veterinaria	Istituto Zooprofilattico Sperimentale delle Venezie	Ruano, M.J.; Rocha, A.; Sanchez, A.; Aguero, M; Barbierato, G.; Zecchin, B.; Fusaro, A.; Schivo, A.; Salviato, A.; Palumbo, E.; Giussani, E.; Pastori, A.; Monne, I.; Terregino, C.
EPI2220595	PB1	Spain	2022-Oct-18	EPI_ISL_15878539	A/Mink/Spain/3691-8_22VIR10586-10/2022	Laboratorio Central de Veterinaria	Istituto Zooprofilattico Sperimentale delle Venezie	Ruano, M.J.; Rocha, A.; Sanchez, A.; Aguero, M; Barbierato, G.; Zecchin, B.; Fusaro, A.; Schivo, A.; Salviato, A.; Palumbo, E.; Giussani, E.; Pastori, A.; Monne, I.; Terregino, C.
EPI2652298	PB1	Poland	2023-Jan-01	EPI_ISL_18033418	A/domestic_cat/Poland/H322-M/2023	National Veterinary Research Institut Poland, PIWet-PIB	National Veterinary Research Institut Poland, PIWet-PIB	Swieton,Edyta;Tarasiuk,Karolina;Wyrostek,Krzysztof;Stys-Fijol,Natalia;Domanska-Blicharz,Katarzyna
EPI2652291	PB1	Poland	2023-Jan-01	EPI_ISL_18033417	A/domestic_cat/Poland/H321-M/2023	National Veterinary Research Institut Poland, PIWet-PIB	National Veterinary Research Institut Poland, PIWet-PIB	Swieton,Edyta;Tarasiuk,Karolina;Wyrostek,Krzysztof;Stys-Fijol,Natalia;Domanska-Blicharz,Katarzyna
EPI2652284	PB1	Poland	2023-Jan-01	EPI_ISL_18033416	A/domestic_cat/Poland/H320-M/2023	National Veterinary Research Institut Poland, PIWet-PIB	National Veterinary Research Institut Poland, PIWet-PIB	Swieton,Edyta;Tarasiuk,Karolina;Wyrostek,Krzysztof;Stys-Fijol,Natalia;Domanska-Blicharz,Katarzyna
EPI2652277	PB1	Poland	2023-Jan-01	EPI_ISL_18033415	A/domestic_cat/Poland/H319-M/2023	National Veterinary Research Institut Poland, PIWet-PIB	National Veterinary Research Institut Poland, PIWet-PIB	Swieton,Edyta;Tarasiuk,Karolina;Wyrostek,Krzysztof;Stys-Fijol,Natalia;Domanska-Blicharz,Katarzyna
EPI2652270	PB1	Poland	2023-Jul-06	EPI_ISL_18033414	A/domestic_cat/Poland/H314-W3/2023	National Veterinary Research Institut Poland, PIWet-PIB	National Veterinary Research Institut Poland, PIWet-PIB	Swieton,Edyta;Tarasiuk,Karolina;Wyrostek,Krzysztof;Stys-Fijol,Natalia;Domanska-Blicharz,Katarzyna
EPI2652263	PB1	Poland	2023-Jan-01	EPI_ISL_18033413	A/domestic_cat/Poland/H304-M2/2023	National Veterinary Research Institut Poland, PIWet-PIB	National Veterinary Research Institut Poland, PIWet-PIB	Swieton,Edyta;Tarasiuk,Karolina;Wyrostek,Krzysztof;Stys-Fijol,Natalia;Domanska-Blicharz,Katarzyna
EPI2652256	PB1	Poland	2023-Jan-01	EPI_ISL_18033412	A/domestic_cat/Poland/H304-M1/2023	National Veterinary Research Institut Poland, PIWet-PIB	National Veterinary Research Institut Poland, PIWet-PIB	Swieton,Edyta;Tarasiuk,Karolina;Wyrostek,Krzysztof;Stys-Fijol,Natalia;Domanska-Blicharz,Katarzyna
EPI2652249	PB1	Poland	2023-Jan-01	EPI_ISL_18033411	A/domestic_cat/Poland/H299-N/2023	National Veterinary Research Institut Poland, PIWet-PIB	National Veterinary Research Institut Poland, PIWet-PIB	Swieton,Edyta;Tarasiuk,Karolina;Wyrostek,Krzysztof;Stys-Fijol,Natalia;Domanska-Blicharz,Katarzyna
EPI2652242	PB1	Poland	2023-Jan-01	EPI_ISL_18033410	A/domestic_cat/Poland/H293-N/2023	National Veterinary Research Institut Poland, PIWet-PIB	National Veterinary Research Institut Poland, PIWet-PIB	Swieton,Edyta;Tarasiuk,Karolina;Wyrostek,Krzysztof;Stys-Fijol,Natalia;Domanska-Blicharz,Katarzyna
EPI2652235	PB1	Poland	2023-Jan-01	EPI_ISL_18033409	A/domestic_cat/Poland/H275k3-M/2023	National Veterinary Research Institut Poland, PIWet-PIB	National Veterinary Research Institut Poland, PIWet-PIB	Swieton,Edyta;Tarasiuk,Karolina;Wyrostek,Krzysztof;Stys-Fijol,Natalia;Domanska-Blicharz,Katarzyna
EPI2616228	PB1	Poland	2023-Jun-26	EPI_ISL_17971998	A/domestic_cat/Poland/H264-G/2023(H5N1)	National Veterinary Research Institut Poland, PIWet-PIB	National Veterinary Research Institut Poland, PIWet-PIB	Swieton, E.;Domanska-Blicharz, K.;Tarasiuk, K.; Wyrostek, K.;Stys-Fijol, N.
EPI2616220	PB1	Poland	2023-Jun-26	EPI_ISL_17971997	A/domestic_cat/Poland/H277-W1/2023(H5N1)	National Veterinary Research Institut Poland, PIWet-PIB	National Veterinary Research Institut Poland, PIWet-PIB	Swieton, E.;Domanska-Blicharz, K.;Tarasiuk, K.; Wyrostek, K.;Stys-Fijol, N.
EPI2616212	PB1	Poland	2023-Jun-25	EPI_ISL_17971996	A/domestic_cat/Poland/H271-W/2023(H5N1)	National Veterinary Research Institut Poland, PIWet-PIB	National Veterinary Research Institut Poland, PIWet-PIB	Swieton, E.;Domanska-Blicharz, K.;Tarasiuk, K.; Wyrostek, K.;Stys-Fijol, N.
EPI2616204	PB1	Poland	2023-Jun-25	EPI_ISL_17971995	A/domestic_cat/Poland/H270-W/2023(H5N1)	National Veterinary Research Institut Poland, PIWet-PIB	National Veterinary Research Institut Poland, PIWet-PIB	Swieton, E.;Domanska-Blicharz, K.;Tarasiuk, K.; Wyrostek, K.;Stys-Fijol, N.
EPI2616196	PB1	Poland	2023-Jun-25	EPI_ISL_17971994	A/domestic_cat/Poland/H267-W/2023(H5N1)	National Veterinary Research Institut Poland, PIWet-PIB	National Veterinary Research Institut Poland, PIWet-PIB	Swieton, E.;Domanska-Blicharz, K.;Tarasiuk, K.; Wyrostek, K.;Stys-Fijol, N.
EPI2616188	PB1	Poland	2023-Jun-19	EPI_ISL_17971993	A/domestic_cat/Poland/H266-W/2023(H5N1)	National Veterinary Research Institut Poland, PIWet-PIB	National Veterinary Research Institut Poland, PIWet-PIB	Swieton, E.;Domanska-Blicharz, K.;Tarasiuk, K.; Wyrostek, K.;Stys-Fijol, N.
EPI2616180	PB1	Poland	2023-Jun-26	EPI_ISL_17971992	A/domestic_cat/Poland/H263-G/2023(H5N1)	National Veterinary Research Institut Poland, PIWet-PIB	National Veterinary Research Institut Poland, PIWet-PIB	Swieton, E.;Domanska-Blicharz, K.;Tarasiuk, K.; Wyrostek, K.;Stys-Fijol, N.
EPI2616172	PB1	Poland	2023-Jun-24	EPI_ISL_17971991	A/domestic_cat/Poland/H257-G/2023(H5N1)	National Veterinary Research Institut Poland, PIWet-PIB	National Veterinary Research Institut Poland, PIWet-PIB	Swieton, E.;Domanska-Blicharz, K.;Tarasiuk, K.; Wyrostek, K.;Stys-Fijol, N.
EPI2616164	PB1	Poland	2023-Jun-24	EPI_ISL_17971990	A/domestic_cat/Poland/H256-G/2023(H5N1)	National Veterinary Research Institut Poland, PIWet-PIB	National Veterinary Research Institut Poland, PIWet-PIB	Swieton, E.;Domanska-Blicharz, K.;Tarasiuk, K.; Wyrostek, K.;Stys-Fijol, N.
EPI2616156	PB1	Poland	2023-Jun-21	EPI_ISL_17971989	A/domestic_cat/Poland/H255-M/2023(H5N1)	National Veterinary Research Institut Poland, PIWet-PIB	National Veterinary Research Institut Poland, PIWet-PIB	Swieton, E.;Domanska-Blicharz, K.;Tarasiuk, K.; Wyrostek, K.;Stys-Fijol, N.
EPI2610819	PB1	Poland	2023-Jun-19	EPI_ISL_17951056	A/domestic_cat/Poland/Kot1/2023	National Veterinary Research Institut Poland, PIWet-PIB	National Veterinary Research Institut Poland, PIWet-PIB	Edyta,≈öwiƒôto≈Ñ; Katarzyna,Doma≈Ñska-Blicharz; Aleksandra,Giza; Marta,Pietruk; Karolina,Tarasiuk; Krzysztof,Wyrostek; Natalia, Sty≈õ-Fijo≈Ç
EPI2610811	PB1	Poland	2023-Jun-20	EPI_ISL_17951055	A/domestic_cat/Poland/H247/2023	National Veterinary Research Institut Poland, PIWet-PIB	National Veterinary Research Institut Poland, PIWet-PIB	Edyta,≈öwiƒôto≈Ñ; Katarzyna,Doma≈Ñska-Blicharz; Aleksandra,Giza; Marta,Pietruk; Karolina,Tarasiuk; Krzysztof,Wyrostek; Natalia, Sty≈õ-Fijo≈Ç
EPI2610795	PB1	Poland	2023-Jun-22	EPI_ISL_17951053	A/domestic_cat/Poland/H254/2023	National Veterinary Research Institut Poland, PIWet-PIB	National Veterinary Research Institut Poland, PIWet-PIB	Edyta,≈öwiƒôto≈Ñ; Katarzyna,Doma≈Ñska-Blicharz; Aleksandra,Giza; Marta,Pietruk; Karolina,Tarasiuk; Krzysztof,Wyrostek; Natalia, Sty≈õ-Fijo≈Ç
EPI2610779	PB1	Poland	2023-Jun-22	EPI_ISL_17951051	A/domestic_cat/Poland/H252/2023	National Veterinary Research Institut Poland, PIWet-PIB	National Veterinary Research Institut Poland, PIWet-PIB	Edyta,≈öwiƒôto≈Ñ; Katarzyna,Doma≈Ñska-Blicharz; Aleksandra,Giza; Marta,Pietruk; Karolina,Tarasiuk; Krzysztof,Wyrostek; Natalia, Sty≈õ-Fijo≈Ç
EPI2610771	PB1	Poland	2023-Jun-22	EPI_ISL_17950995	A/domestic_cat/Poland/H249/2023	National Veterinary Research Institut Poland, PIWet-PIB	National Veterinary Research Institut Poland, PIWet-PIB	Edyta,≈öwiƒôto≈Ñ; Katarzyna,Doma≈Ñska-Blicharz; Aleksandra,Giza; Marta,Pietruk; Karolina,Tarasiuk; Krzysztof,Wyrostek; Natalia, Sty≈õ-Fijo≈Ç
EPI2603669	PB1	United States	2023-Mar-30	EPI_ISL_17821770	A/cat/Nebraska/23-010184-001/2023	Nebraska Veterinary Diagnostic Center	National Veterinary Services Laboratories - USDA	Chinh,Thanh;Franzen,Kerrie;Love,Emily;Ozella,Mikaela;Killian,Mary;Lantz,Kristina;Stuber,Tod;Hicks,Jessica;Norris,Cameron
EPI2281676	PB1	France	2022-Dec-24	EPI_ISL_16395206	A/cat/France/22P026544/2022	Anses (Ploufragan-Plouzan√©)	ANSES Agence Nationale De Securite Sanitaire De L‚Äôalimentation
EPI2917765	PB1	Finland	2023-Oct-17	EPI_ISL_18771245	A/white mink/Finland/UH-361-E1/2023	University of Helsinki, Department of Virology	Finnish Institute for Health and Welfare, THL	Altan, E; Avelin, V; Lindh, E; Savolainen-Kopra, C; Sironen, T; √ñsterlund, P.
EPI2917757	PB1	Finland	2023-Oct-17	EPI_ISL_18771244	A/white mink/Finland/UH-357-E1/2023	University of Helsinki, Department of Virology	Finnish Institute for Health and Welfare, THL	Altan, E; Avelin, V; Lindh, E; Savolainen-Kopra, C; Sironen, T; √ñsterlund, P.
EPI2907888	PB1	Finland	2023-Sep-20	EPI_ISL_18755130	A/mink/Finland/3082/2023	Finnish Food Authority	Finnish Food Authority	Kauppinen, Ari; Kareinen, Lauri; Tammiranta, Niina; Kantala, Tuija; Fusaro, Alice; Gadd, Tuija
EPI2907879	PB1	Finland	2023-Sep-20	EPI_ISL_18755129	A/mink/Finland/3080/2023	Finnish Food Authority	Finnish Food Authority	Kauppinen, Ari; Kareinen, Lauri; Tammiranta, Niina; Kantala, Tuija; Fusaro, Alice; Gadd, Tuija
EPI2755657	PB1	Finland	2023-Aug-07	EPI_ISL_18290480	A/mink/Finland/735/2023	Finnish Food Authority	Finnish Food Authority	Kauppinen, Ari; Kareinen, Lauri; Tammiranta, Niina; Kantala, Tuija; Fusaro, Alice; Gadd, Tuija
EPI2755649	PB1	Finland	2023-Aug-07	EPI_ISL_18290479	A/mink/Finland/731/2023	Finnish Food Authority	Finnish Food Authority	Kauppinen, Ari; Kareinen, Lauri; Tammiranta, Niina; Kantala, Tuija; Fusaro, Alice; Gadd, Tuija
EPI2755565	PB1	Finland	2023-Jul-03	EPI_ISL_18290468	A/mink/Finland/1003/2023	Finnish Food Authority	Finnish Food Authority	Kauppinen, Ari; Kareinen, Lauri; Tammiranta, Niina; Kantala, Tuija; Fusaro, Alice; Gadd, Tuija
EPI2755771	PB1	Finland	2023-Jul-03	EPI_ISL_18290467	A/mink/Finland/1002/2023	Finnish Food Authority	Finnish Food Authority	Kauppinen, Ari; Kareinen, Lauri; Tammiranta, Niina; Kantala, Tuija; Fusaro, Alice; Gadd, Tuija
EPI2641541	PB1	Finland	2023-Jul-03	EPI_ISL_18011231	A/mink/Finland/1002_23VIR6803-8/2023	Finnish Food Authority	Istituto Zooprofilattico Sperimentale Delle Venezie	Kantala, T.;Kauppinen, A.;Kareinen, L.;Gadd, T.;Galiano, M.;Ikonen, N.;Lindh, E.;Ormelli, S.;Varotto, M.;Zecchin, B.;Pastori, A.;Fusaro, A.;Zamperin, G.;Monne, I.;Terregino, C
EPI2536829	PB1	Netherlands	2022-Jan-16	EPI_ISL_17583227	A/Stone Marten/Netherlands/EMC1/2022	Erasmus Medical Center	Erasmus Medical Center	Vuong,O;Thewessen, S;Bellido-Martin,A.B; Chestakova, I; Sikkema, R;Fouchier, R.A.M.
EPI1965227	PB1	Netherlands	2022-Jan-17	EPI_ISL_9111104	A/otter/Netherlands/22001014-005/2022	Wageningen Bioveterinary Research	Wageningen Bioveterinary Research	Beerens, Nancy; Harders, Frank; Pritz-Verschuren, Sylvia; Roose, Marit; Venema, Sandra; Germeraad, Evelien; Engelsma, Marc; Heutink, Rene
EPI3261181	PB1	United States	2024-Mar-20	EPI_ISL_19094660	A/domestic cat/Oklahoma/24_009118-002/2024	United States Department of Agriculture, Agricultural Research Service, National Animal Disease Center	United States Department of Agriculture, Agricultural Research Service, National Animal Disease Center	Nguyen,T., Hutter,C., Markin,A., Thomas,M., Lantz,K., Killian,M.L., Janzen,G.M., Vijendran,S., Wagle,S., Inderski,B., Magstadt,D.R., Li,G., Diel,D.G., Frye,E.A., Dimitrov,K.M., Swinford,A.K., Thompson,A.C., Snevik,K.R., Suarez,D.L., Spackman,E., Lakin,S.M., C,S., Johnson,K.R., Baker,A.L., Robbe-Austerman,S., Torchetti,M.K.; Anderson,T.K.
EPI3255566	PB1	United States	2024-Mar-20	EPI_ISL_19088568	A/feline/Texas/24-029329-02/2024	Iowa State University, Veterinary Microbiology and Preventive Medicine Faculty	Iowa State University, Veterinary Microbiology and Preventive Medicine Faculty	Burrough,E.R., Magstadt,D.R., Petersen,B., Timmermans,S.J., Gauger,P.C., Zhang,J., Siepker,C., Mainenti,M., Li,G., Thompson,A.C., Gorden,P.J., Plummer,P.J.; Main,R.
EPI3255575	PB1	United States	2024-Mar-20	EPI_ISL_19088567	A/feline/Texas/24-029329-01/2024	Iowa State University, Veterinary Microbiology and Preventive Medicine Faculty	Iowa State University, Veterinary Microbiology and Preventive Medicine Faculty	Burrough,E.R., Magstadt,D.R., Petersen,B., Timmermans,S.J., Gauger,P.C., Zhang,J., Siepker,C., Mainenti,M., Li,G., Thompson,A.C., Gorden,P.J., Plummer,P.J.; Main,R.
EPI3208233	PB1	United States	2023-Jan-01	EPI_ISL_19054399	A/feline/USA/23-037332-001/2023	National Veterinary Services Laboratories - USDA	National Veterinary Services Laboratories - USDA	Aufderhar,Matthew;Franzen,Kerrie;Love,Emily;Killian,Mary;Lantz,Kristina;Stuber,Tod;Hicks,Jessica;Norris,Cameron
EPI3208225	PB1	United States	2024-Mar-16	EPI_ISL_19054398	A/feline/USA/24-009311-006/2024	National Veterinary Services Laboratories - USDA	National Veterinary Services Laboratories - USDA	Aufderhar,Matthew;Franzen,Kerrie;Love,Emily;Killian,Mary;Lantz,Kristina;Stuber,Tod;Hicks,Jessica;Norris,Cameron
EPI3208217	PB1	United States	2024-Mar-16	EPI_ISL_19054397	A/feline/Texas/24-009311-004/2024	National Veterinary Services Laboratories - USDA	National Veterinary Services Laboratories - USDA	Aufderhar,Matthew;Franzen,Kerrie;Love,Emily;Killian,Mary;Lantz,Kristina;Stuber,Tod;Hicks,Jessica;Norris,Cameron
EPI3208209	PB1	United States	2024-Mar-20	EPI_ISL_19054396	A/feline/New Mexico/24-009116-005/2024	National Veterinary Services Laboratories - USDA	National Veterinary Services Laboratories - USDA	Aufderhar,Matthew;Franzen,Kerrie;Love,Emily;Killian,Mary;Lantz,Kristina;Stuber,Tod;Hicks,Jessica;Norris,Cameron
EPI3208201	PB1	United States	2024-Mar-20	EPI_ISL_19054395	A/feline/New Mexico/24-009116-004/2024	National Veterinary Services Laboratories - USDA	National Veterinary Services Laboratories - USDA	Aufderhar,Matthew;Franzen,Kerrie;Love,Emily;Killian,Mary;Lantz,Kristina;Stuber,Tod;Hicks,Jessica;Norris,Cameron
EPI3208193	PB1	United States	2024-Mar-20	EPI_ISL_19054394	A/feline/New Mexico/24-009116-002/2024	National Veterinary Services Laboratories - USDA	National Veterinary Services Laboratories - USDA	Aufderhar,Matthew;Franzen,Kerrie;Love,Emily;Killian,Mary;Lantz,Kristina;Stuber,Tod;Hicks,Jessica;Norris,Cameron
EPI3208185	PB1	United States	2024-Mar-20	EPI_ISL_19054393	A/feline/Texas/24-008850-002/2024	National Veterinary Services Laboratories - USDA	National Veterinary Services Laboratories - USDA	Aufderhar,Matthew;Franzen,Kerrie;Love,Emily;Killian,Mary;Lantz,Kristina;Stuber,Tod;Hicks,Jessica;Norris,Cameron
EPI3208177	PB1	United States	2024-Mar-20	EPI_ISL_19054392	A/feline/Texas/24-008850-001/2024	National Veterinary Services Laboratories - USDA	National Veterinary Services Laboratories - USDA	Aufderhar,Matthew;Franzen,Kerrie;Love,Emily;Killian,Mary;Lantz,Kristina;Stuber,Tod;Hicks,Jessica;Norris,Cameron
EPI3208169	PB1	United States	2024-Mar-22	EPI_ISL_19054391	A/feline/Texas/24-008764-002/2024	National Veterinary Services Laboratories - USDA	National Veterinary Services Laboratories - USDA	Aufderhar,Matthew;Franzen,Kerrie;Love,Emily;Killian,Mary;Lantz,Kristina;Stuber,Tod;Hicks,Jessica;Norris,Cameron
EPI3208161	PB1	United States	2024-Mar-22	EPI_ISL_19054390	A/feline/Texas/24-008764-001/2024	National Veterinary Services Laboratories - USDA	National Veterinary Services Laboratories - USDA	Aufderhar,Matthew;Franzen,Kerrie;Love,Emily;Killian,Mary;Lantz,Kristina;Stuber,Tod;Hicks,Jessica;Norris,Cameron
EPI3261253	PB1	United States	2024-Mar-08	EPI_ISL_19094669	A/goat/Minnesota/24_007234-035/2024	United States Department of Agriculture, Agricultural Research Service, National Animal Disease Center	United States Department of Agriculture, Agricultural Research Service, National Animal Disease Center	Nguyen,T., Hutter,C., Markin,A., Thomas,M., Lantz,K., Killian,M.L., Janzen,G.M., Vijendran,S., Wagle,S., Inderski,B., Magstadt,D.R., Li,G., Diel,D.G., Frye,E.A., Dimitrov,K.M., Swinford,A.K., Thompson,A.C., Snevik,K.R., Suarez,D.L., Spackman,E., Lakin,S.M., C,S., Johnson,K.R., Baker,A.L., Robbe-Austerman,S., Torchetti,M.K.; Anderson,T.K.
EPI3261237	PB1	United States	2024-Mar-08	EPI_ISL_19094667	A/goat/Minnesota/24_007234-032/2024	United States Department of Agriculture, Agricultural Research Service, National Animal Disease Center	United States Department of Agriculture, Agricultural Research Service, National Animal Disease Center	Nguyen,T., Hutter,C., Markin,A., Thomas,M., Lantz,K., Killian,M.L., Janzen,G.M., Vijendran,S., Wagle,S., Inderski,B., Magstadt,D.R., Li,G., Diel,D.G., Frye,E.A., Dimitrov,K.M., Swinford,A.K., Thompson,A.C., Snevik,K.R., Suarez,D.L., Spackman,E., Lakin,S.M., C,S., Johnson,K.R., Baker,A.L., Robbe-Austerman,S., Torchetti,M.K.; Anderson,T.K.
EPI3261229	PB1	United States	2024-Mar-08	EPI_ISL_19094666	A/goat/Minnesota/24_007234-030/2024	United States Department of Agriculture, Agricultural Research Service, National Animal Disease Center	United States Department of Agriculture, Agricultural Research Service, National Animal Disease Center	Nguyen,T., Hutter,C., Markin,A., Thomas,M., Lantz,K., Killian,M.L., Janzen,G.M., Vijendran,S., Wagle,S., Inderski,B., Magstadt,D.R., Li,G., Diel,D.G., Frye,E.A., Dimitrov,K.M., Swinford,A.K., Thompson,A.C., Snevik,K.R., Suarez,D.L., Spackman,E., Lakin,S.M., C,S., Johnson,K.R., Baker,A.L., Robbe-Austerman,S., Torchetti,M.K.; Anderson,T.K.
EPI3261221	PB1	United States	2024-Mar-08	EPI_ISL_19094665	A/goat/Minnesota/24_007234-029/2024	United States Department of Agriculture, Agricultural Research Service, National Animal Disease Center	United States Department of Agriculture, Agricultural Research Service, National Animal Disease Center	Nguyen,T., Hutter,C., Markin,A., Thomas,M., Lantz,K., Killian,M.L., Janzen,G.M., Vijendran,S., Wagle,S., Inderski,B., Magstadt,D.R., Li,G., Diel,D.G., Frye,E.A., Dimitrov,K.M., Swinford,A.K., Thompson,A.C., Snevik,K.R., Suarez,D.L., Spackman,E., Lakin,S.M., C,S., Johnson,K.R., Baker,A.L., Robbe-Austerman,S., Torchetti,M.K.; Anderson,T.K.
EPI3261093	PB1	United States	2024-Mar-08	EPI_ISL_19094649	A/goat/Minnesota/24_007234-036/2024	United States Department of Agriculture, Agricultural Research Service, National Animal Disease Center	United States Department of Agriculture, Agricultural Research Service, National Animal Disease Center	Nguyen,T., Hutter,C., Markin,A., Thomas,M., Lantz,K., Killian,M.L., Janzen,G.M., Vijendran,S., Wagle,S., Inderski,B., Magstadt,D.R., Li,G., Diel,D.G., Frye,E.A., Dimitrov,K.M., Swinford,A.K., Thompson,A.C., Snevik,K.R., Suarez,D.L., Spackman,E., Lakin,S.M., C,S., Johnson,K.R., Baker,A.L., Robbe-Austerman,S., Torchetti,M.K.; Anderson,T.K.
EPI3261085	PB1	United States	2024-Mar-08	EPI_ISL_19094648	A/goat/Minnesota/24_007234-037/2024	United States Department of Agriculture, Agricultural Research Service, National Animal Disease Center	United States Department of Agriculture, Agricultural Research Service, National Animal Disease Center	Nguyen,T., Hutter,C., Markin,A., Thomas,M., Lantz,K., Killian,M.L., Janzen,G.M., Vijendran,S., Wagle,S., Inderski,B., Magstadt,D.R., Li,G., Diel,D.G., Frye,E.A., Dimitrov,K.M., Swinford,A.K., Thompson,A.C., Snevik,K.R., Suarez,D.L., Spackman,E., Lakin,S.M., C,S., Johnson,K.R., Baker,A.L., Robbe-Austerman,S., Torchetti,M.K.; Anderson,T.K.
EPI3261077	PB1	United States	2024-Mar-08	EPI_ISL_19094647	A/goat/Minnesota/24_007234-044/2024	United States Department of Agriculture, Agricultural Research Service, National Animal Disease Center	United States Department of Agriculture, Agricultural Research Service, National Animal Disease Center	Nguyen,T., Hutter,C., Markin,A., Thomas,M., Lantz,K., Killian,M.L., Janzen,G.M., Vijendran,S., Wagle,S., Inderski,B., Magstadt,D.R., Li,G., Diel,D.G., Frye,E.A., Dimitrov,K.M., Swinford,A.K., Thompson,A.C., Snevik,K.R., Suarez,D.L., Spackman,E., Lakin,S.M., C,S., Johnson,K.R., Baker,A.L., Robbe-Austerman,S., Torchetti,M.K.; Anderson,T.K.
EPI3261069	PB1	United States	2024-Mar-08	EPI_ISL_19094646	A/goat/Minnesota/24_007234-047/2024	United States Department of Agriculture, Agricultural Research Service, National Animal Disease Center	United States Department of Agriculture, Agricultural Research Service, National Animal Disease Center	Nguyen,T., Hutter,C., Markin,A., Thomas,M., Lantz,K., Killian,M.L., Janzen,G.M., Vijendran,S., Wagle,S., Inderski,B., Magstadt,D.R., Li,G., Diel,D.G., Frye,E.A., Dimitrov,K.M., Swinford,A.K., Thompson,A.C., Snevik,K.R., Suarez,D.L., Spackman,E., Lakin,S.M., C,S., Johnson,K.R., Baker,A.L., Robbe-Austerman,S., Torchetti,M.K.; Anderson,T.K.
EPI3260997	PB1	United States	2024-Feb-23	EPI_ISL_19094637	A/skunk/Washington/24_005959-006/2024	United States Department of Agriculture, Agricultural Research Service, National Animal Disease Center	United States Department of Agriculture, Agricultural Research Service, National Animal Disease Center	Nguyen,T., Hutter,C., Markin,A., Thomas,M., Lantz,K., Killian,M.L., Janzen,G.M., Vijendran,S., Wagle,S., Inderski,B., Magstadt,D.R., Li,G., Diel,D.G., Frye,E.A., Dimitrov,K.M., Swinford,A.K., Thompson,A.C., Snevik,K.R., Suarez,D.L., Spackman,E., Lakin,S.M., C,S., Johnson,K.R., Baker,A.L., Robbe-Austerman,S., Torchetti,M.K.; Anderson,T.K.
EPI3260989	PB1	United States	2024-Feb-23	EPI_ISL_19094636	A/skunk/Washington/24_005959-005/2024	United States Department of Agriculture, Agricultural Research Service, National Animal Disease Center	United States Department of Agriculture, Agricultural Research Service, National Animal Disease Center	Nguyen,T., Hutter,C., Markin,A., Thomas,M., Lantz,K., Killian,M.L., Janzen,G.M., Vijendran,S., Wagle,S., Inderski,B., Magstadt,D.R., Li,G., Diel,D.G., Frye,E.A., Dimitrov,K.M., Swinford,A.K., Thompson,A.C., Snevik,K.R., Suarez,D.L., Spackman,E., Lakin,S.M., C,S., Johnson,K.R., Baker,A.L., Robbe-Austerman,S., Torchetti,M.K.; Anderson,T.K.
EPI3260981	PB1	United States	2024-Feb-23	EPI_ISL_19094635	A/skunk/Washington/24_005959-004/2024	United States Department of Agriculture, Agricultural Research Service, National Animal Disease Center	United States Department of Agriculture, Agricultural Research Service, National Animal Disease Center	Nguyen,T., Hutter,C., Markin,A., Thomas,M., Lantz,K., Killian,M.L., Janzen,G.M., Vijendran,S., Wagle,S., Inderski,B., Magstadt,D.R., Li,G., Diel,D.G., Frye,E.A., Dimitrov,K.M., Swinford,A.K., Thompson,A.C., Snevik,K.R., Suarez,D.L., Spackman,E., Lakin,S.M., C,S., Johnson,K.R., Baker,A.L., Robbe-Austerman,S., Torchetti,M.K.; Anderson,T.K.
EPI3260973	PB1	United States	2024-Mar-23	EPI_ISL_19094634	A/raccoon/New Mexico/24_009496-002/2024	United States Department of Agriculture, Agricultural Research Service, National Animal Disease Center	United States Department of Agriculture, Agricultural Research Service, National Animal Disease Center	Nguyen,T., Hutter,C., Markin,A., Thomas,M., Lantz,K., Killian,M.L., Janzen,G.M., Vijendran,S., Wagle,S., Inderski,B., Magstadt,D.R., Li,G., Diel,D.G., Frye,E.A., Dimitrov,K.M., Swinford,A.K., Thompson,A.C., Snevik,K.R., Suarez,D.L., Spackman,E., Lakin,S.M., C,S., Johnson,K.R., Baker,A.L., Robbe-Austerman,S., Torchetti,M.K.; Anderson,T.K.
EPI3260941	PB1	United States	2024-Mar-08	EPI_ISL_19094630	A/goat/Minnesota/24_007234-050/2024	United States Department of Agriculture, Agricultural Research Service, National Animal Disease Center	United States Department of Agriculture, Agricultural Research Service, National Animal Disease Center	Nguyen,T., Hutter,C., Markin,A., Thomas,M., Lantz,K., Killian,M.L., Janzen,G.M., Vijendran,S., Wagle,S., Inderski,B., Magstadt,D.R., Li,G., Diel,D.G., Frye,E.A., Dimitrov,K.M., Swinford,A.K., Thompson,A.C., Snevik,K.R., Suarez,D.L., Spackman,E., Lakin,S.M., C,S., Johnson,K.R., Baker,A.L., Robbe-Austerman,S., Torchetti,M.K.; Anderson,T.K.
EPI3260933	PB1	United States	2024-Mar-08	EPI_ISL_19094629	A/goat/Minnesota/24_007234-048/2024	United States Department of Agriculture, Agricultural Research Service, National Animal Disease Center	United States Department of Agriculture, Agricultural Research Service, National Animal Disease Center	Nguyen,T., Hutter,C., Markin,A., Thomas,M., Lantz,K., Killian,M.L., Janzen,G.M., Vijendran,S., Wagle,S., Inderski,B., Magstadt,D.R., Li,G., Diel,D.G., Frye,E.A., Dimitrov,K.M., Swinford,A.K., Thompson,A.C., Snevik,K.R., Suarez,D.L., Spackman,E., Lakin,S.M., C,S., Johnson,K.R., Baker,A.L., Robbe-Austerman,S., Torchetti,M.K.; Anderson,T.K.
EPI3244333	PB1	United States	2024-Feb-26	EPI_ISL_19083124	A/Mountain Lion/Montana/01/2024	Montana Public Health Laboratory	National Institute of Allergy and Infectious Diseases NIAID/NIH	Williamson, Brandi; Anzick, Sarah; Yinda, C. Kwe; Beare, Paul; Kanakabandi, Kishore; Martens, Craig; de Wit, Emmie; Munster, Vincent
EPI3229802	PB1	Uruguay	2023-Sep-06	EPI_ISL_19070498	A/pinniped/Uruguay/P4_6923/2023	Universidad de la Rep√∫blica, Facultad de Ciencias, Genetica Evolutiva/Divisi√≥n de Laboratorios Veterinarios, Plataforma Genomica		Tomas,G., Marandino,A., Panzera,Y., Rodriguez,S., Wallau,G.L., Dezordi,F.Z., Perez,R., Bassetti,L., Negro,R., Williman,J., Uriarte,V., Grazioli,F., Leizagoyen,C., Riveron,S., Coronel,J., Bello,S., Paez,E., Lima,M., Mendez,V.; Perez,R.
EPI3229729	PB1	Uruguay	2023-Sep-14	EPI_ISL_19070486	A/pinniped/Uruguay/P18_14923/2023	Universidad de la Rep√∫blica, Facultad de Ciencias, Genetica Evolutiva/Divisi√≥n de Laboratorios Veterinarios, Plataforma Genomica		Tomas,G., Marandino,A., Panzera,Y., Rodriguez,S., Wallau,G.L., Dezordi,F.Z., Perez,R., Bassetti,L., Negro,R., Williman,J., Uriarte,V., Grazioli,F., Leizagoyen,C., Riveron,S., Coronel,J., Bello,S., Paez,E., Lima,M., Mendez,V.; Perez,R.
EPI3229721	PB1	Uruguay	2023-Sep-14	EPI_ISL_19070485	A/pinniped/Uruguay/P17_14923/2023	Universidad de la Rep√∫blica, Facultad de Ciencias, Genetica Evolutiva/Divisi√≥n de Laboratorios Veterinarios, Plataforma Genomica		Tomas,G., Marandino,A., Panzera,Y., Rodriguez,S., Wallau,G.L., Dezordi,F.Z., Perez,R., Bassetti,L., Negro,R., Williman,J., Uriarte,V., Grazioli,F., Leizagoyen,C., Riveron,S., Coronel,J., Bello,S., Paez,E., Lima,M., Mendez,V.; Perez,R.
EPI3229707	PB1	Uruguay	2023-Sep-11	EPI_ISL_19070483	A/pinniped/Uruguay/P14_11923/2023	Universidad de la Rep√∫blica, Facultad de Ciencias, Genetica Evolutiva/Divisi√≥n de Laboratorios Veterinarios, Plataforma Genomica		Tomas,G., Marandino,A., Panzera,Y., Rodriguez,S., Wallau,G.L., Dezordi,F.Z., Perez,R., Bassetti,L., Negro,R., Williman,J., Uriarte,V., Grazioli,F., Leizagoyen,C., Riveron,S., Coronel,J., Bello,S., Paez,E., Lima,M., Mendez,V.; Perez,R.
EPI3229699	PB1	Uruguay	2023-Sep-11	EPI_ISL_19070482	A/pinniped/Uruguay/P13_11923/2023	Universidad de la Rep√∫blica, Facultad de Ciencias, Genetica Evolutiva/Divisi√≥n de Laboratorios Veterinarios, Plataforma Genomica		Tomas,G., Marandino,A., Panzera,Y., Rodriguez,S., Wallau,G.L., Dezordi,F.Z., Perez,R., Bassetti,L., Negro,R., Williman,J., Uriarte,V., Grazioli,F., Leizagoyen,C., Riveron,S., Coronel,J., Bello,S., Paez,E., Lima,M., Mendez,V.; Perez,R.
EPI3229691	PB1	Uruguay	2023-Sep-08	EPI_ISL_19070481	A/pinniped/Uruguay/P10_8923/2023	Universidad de la Rep√∫blica, Facultad de Ciencias, Genetica Evolutiva/Divisi√≥n de Laboratorios Veterinarios, Plataforma Genomica		Tomas,G., Marandino,A., Panzera,Y., Rodriguez,S., Wallau,G.L., Dezordi,F.Z., Perez,R., Bassetti,L., Negro,R., Williman,J., Uriarte,V., Grazioli,F., Leizagoyen,C., Riveron,S., Coronel,J., Bello,S., Paez,E., Lima,M., Mendez,V.; Perez,R.
EPI3162331	PB1	United States	2024-Mar-08	EPI_ISL_19015125	A/goat/Minnesota/24-007234-009/2024	National Veterinary Services Laboratories - USDA	National Veterinary Services Laboratories - USDA	Aufderhar,Matthew;Franzen,Kerrie;Love,Emily;Killian,Mary;Lantz,Kristina;Stuber,Tod;Hicks,Jessica;Norris,Cameron
EPI3162323	PB1	United States	2024-Mar-08	EPI_ISL_19015124	A/goat/Minnesota/24-007234-006/2024	National Veterinary Services Laboratories - USDA	National Veterinary Services Laboratories - USDA	Aufderhar,Matthew;Franzen,Kerrie;Love,Emily;Killian,Mary;Lantz,Kristina;Stuber,Tod;Hicks,Jessica;Norris,Cameron
EPI3162315	PB1	United States	2024-Mar-08	EPI_ISL_19015123	A/goat/Minnesota/24-007234-003/2024	National Veterinary Services Laboratories - USDA	National Veterinary Services Laboratories - USDA	Aufderhar,Matthew;Franzen,Kerrie;Love,Emily;Killian,Mary;Lantz,Kristina;Stuber,Tod;Hicks,Jessica;Norris,Cameron
EPI3110566	PB1	United States	2023-Oct-01	EPI_ISL_18976667	A/polar bear/Alaska/23-038123/2023	United States Department of Agriculture, National Veterinary Services Laboratories-Diagnostic Virology Laboratory	National Veterinary Services Laboratories - USDA	Franzen,Kerrie;Love,Emily;Ozella,Mikaela;Killian,Mary;Lantz,Kristina;Stuber,Tod;Hicks,Jessica;Norris,Cameron
EPI2759137	PB1	United States	2023-Aug-29	EPI_ISL_18311028	A/harbor seal/Washington/23-026504-002/2023	National Veterinary Services Laboratories - USDA	National Veterinary Services Laboratories - USDA	Chinh,Thanh;Franzen,Kerrie;Love,Emily;Ozella,Mikaela;Killian,Mary;Lantz,Kristina;Stuber,Tod;Hicks,Jessica;Norris,Cameron
EPI2759129	PB1	United States	2023-Aug-29	EPI_ISL_18311027	A/harbor seal/Washington/23-026504-001/2023	National Veterinary Services Laboratories - USDA	National Veterinary Services Laboratories - USDA	Chinh,Thanh;Franzen,Kerrie;Love,Emily;Ozella,Mikaela;Killian,Mary;Lantz,Kristina;Stuber,Tod;Hicks,Jessica;Norris,Cameron
EPI2759113	PB1	United States	2023-Aug-25	EPI_ISL_18311025	A/harbor seal/Washington/23-025991-001/2023	National Veterinary Services Laboratories - USDA	National Veterinary Services Laboratories - USDA	Chinh,Thanh;Franzen,Kerrie;Love,Emily;Ozella,Mikaela;Killian,Mary;Lantz,Kristina;Stuber,Tod;Hicks,Jessica;Norris,Cameron
EPI2759105	PB1	United States	2023-Aug-19	EPI_ISL_18311024	A/harbor seal/Washington/23-025744-002/2023	National Veterinary Services Laboratories - USDA	National Veterinary Services Laboratories - USDA	Chinh,Thanh;Franzen,Kerrie;Love,Emily;Ozella,Mikaela;Killian,Mary;Lantz,Kristina;Stuber,Tod;Hicks,Jessica;Norris,Cameron
EPI2745240	PB1	Peru	2022-Nov-22	EPI_ISL_18265431	A/dolphin/Peru/PIU-SER002/2022	Servicio Nacional Forestal y de Fauna Silvestre (SERFOR)	Pontificia Universidad Catolica del Peru	Leguia,M.; Garcia-Glaessner,A.; Munoz-Saavedra,B.; Juarez,D.; Barrera,P.; Jara,J.; Silva,W.; Ploog,K.; Colchao-Claux,P.; Lescano,J.
EPI2664225	PB1	Peru	2022-Nov-22	EPI_ISL_18054503	A/dolphin/Peru/PIU-002/2022			Leguia,M., Garcia-Glaessner,A., Munoz-Saavedra,B., Juarez,D., Barrera,P., Jara,J., Silva,W., Ploog,K., Colchao-Claux,P.; Lescano,J.
EPI2471934	PB1	United Kingdom	2022-Nov-18	EPI_ISL_17257532	A/Bush_dog/England/037680/2022	Animal and Plant Health Agency (APHA)	Animal and Plant Health Agency (APHA)
EPI2467157	PB1	France	2022-Nov-07	EPI_ISL_17233426	A/bear/France/23P002848/2022	Anses (Ploufragan-Plouzan√©)	ANSES Agence Nationale De Securite Sanitaire De L‚Äôalimentation	FX,Briand
EPI2437553	PB1	Canada	2022-May-18	EPI_ISL_17073215	A/striped_skunk/BC/AIVPHL-118/2022	B.C. Centre for Disease Control	British Columbia Centre for Disease Control	Himsworth, Chelsea; Prystajecky,Natalie; Tyson,John; Jassem,Agatha; Kuchinski,Kevin; Coombe, Michelle; Lee,Tracy; Azana,Rob; Fung,Janet; Chan,Michael; Cheung,Branco; Caleta,Jessica; Tsang,Frankie; Russell,Shannon; Zlosnik,James; Hoang,Linda
EPI2437032	PB1	Belgium	2023-Feb-09	EPI_ISL_17072114	A/Mustela_putorius/Belgium/01421_0001/2023	Sciensano - Animal Infectious Diseases	Sciensano, Department of Animal Infectious Diseases	Van Borm, Steven; Roupie, Virginie; Hostyn, Pierre; Mathijs, Elisabeth; Lambrecht, Benedicte; Steensels, Mieke
EPI2263648	PB1	United States	2022-Nov-15	EPI_ISL_16297122	A/skunk/Wisconsin/22-037029-001/2022	National Veterinary Services Laboratories - USDA	National Veterinary Services Laboratories - USDA	Chinh,Thanh;Love, Emily;Franzen,Kerrie;Killian,Mary;Koster,Leo;Lantz,Kristina;Stuber,Tod;Hicks,Jessica
EPI2263440	PB1	United States	2022-Oct-21	EPI_ISL_16297066	A/skunk/Minnesota/22-034925-001/2022	National Veterinary Services Laboratories - USDA	National Veterinary Services Laboratories - USDA	Chinh,Thanh;Love, Emily;Franzen,Kerrie;Killian,Mary;Koster,Leo;Lantz,Kristina;Stuber,Tod;Hicks,Jessica
EPI2236750	PB1	Canada	2022-Apr-26	EPI_ISL_16023453	A/Skunk/AB/FAV-0416-03/2022	Alberta Agriculture and Forestry, Government of Alberta	Canadian Food Inspection Agency	Alkie, Tamiru; Hicks, Mark; Pybuse, Margo J; Xu, Wanhong; Hisanaga, Tamiko; Suderman, Suderman; Koziuk, Janice; Kruczkiewicz, Peter; Nguyen, Hoang Hai; Fisher, Mathew; Lung, Oliver; Berhane, Yohannes
EPI2236758	PB1	Canada	2022-Apr-22	EPI_ISL_16023452	A/Skunk/AB/FAV-0416-02/2022	Alberta Agriculture and Forestry, Government of Alberta	Canadian Food Inspection Agency	Alkie, Tamiru; Hicks, Mark; Pybuse, Margo J; Xu, Wanhong; Hisanaga, Tamiko; Suderman, Suderman; Koziuk, Janice; Kruczkiewicz, Peter; Nguyen, Hoang Hai; Fisher, Mathew; Lung, Oliver; Berhane, Yohannes
EPI2236742	PB1	Canada	2022-Apr-22	EPI_ISL_16023451	A/Skunk/AB/FAV-0416-01/2022	Alberta Agriculture and Forestry, Government of Alberta	Canadian Food Inspection Agency	Alkie, Tamiru; Hicks, Mark; Pybuse, Margo J; Xu, Wanhong; Hisanaga, Tamiko; Suderman, Suderman; Koziuk, Janice; Kruczkiewicz, Peter; Nguyen, Hoang Hai; Fisher, Mathew; Lung, Oliver; Berhane, Yohannes
EPI2236734	PB1	Canada	2022-May-31	EPI_ISL_16023450	A/Skunk/AB/FAV-0835-10/2022	Alberta Agriculture and Forestry, Government of Alberta	Canadian Food Inspection Agency	Alkie, Tamiru; Hicks, Mark; Pybuse, Margo J; Xu, Wanhong; Hisanaga, Tamiko; Suderman, Suderman; Koziuk, Janice; Kruczkiewicz, Peter; Nguyen, Hoang Hai; Fisher, Mathew; Lung, Oliver; Berhane, Yohannes
EPI2236726	PB1	Canada	2022-May-04	EPI_ISL_16023449	A/Skunk/AB/FAV-0835-07/2022	Alberta Agriculture and Forestry, Government of Alberta	Canadian Food Inspection Agency	Alkie, Tamiru; Hicks, Mark; Pybuse, Margo J; Xu, Wanhong; Hisanaga, Tamiko; Suderman, Suderman; Koziuk, Janice; Kruczkiewicz, Peter; Nguyen, Hoang Hai; Fisher, Mathew; Lung, Oliver; Berhane, Yohannes
EPI2236718	PB1	Canada	2022-May-04	EPI_ISL_16023377	A/Skunk/AB/FAV-0835-05/2022	Alberta Agriculture and Forestry, Government of Alberta	Canadian Food Inspection Agency	Alkie, Tamiru; Hicks, Mark; Pybuse, Margo J; Xu, Wanhong; Hisanaga, Tamiko; Suderman, Suderman; Koziuk, Janice; Kruczkiewicz, Peter; Nguyen, Hoang Hai; Fisher, Mathew; Lung, Oliver; Berhane, Yohannes
EPI2236710	PB1	Canada	2022-May-31	EPI_ISL_16023376	A/Skunk/AB/FAV-0835-11/2022	Alberta Agriculture and Forestry, Government of Alberta	Canadian Food Inspection Agency	Alkie, Tamiru; Hicks, Mark; Pybuse, Margo J; Xu, Wanhong; Hisanaga, Tamiko; Suderman, Suderman; Koziuk, Janice; Kruczkiewicz, Peter; Nguyen, Hoang Hai; Fisher, Mathew; Lung, Oliver; Berhane, Yohannes
EPI2236702	PB1	Canada	2022-Jul-19	EPI_ISL_16023375	A/Skunk/AB/FAV-0897-03/2022	Alberta Agriculture and Forestry, Government of Alberta	Canadian Food Inspection Agency	Alkie, Tamiru; Hicks, Mark; Pybuse, Margo J; Xu, Wanhong; Hisanaga, Tamiko; Suderman, Suderman; Koziuk, Janice; Kruczkiewicz, Peter; Nguyen, Hoang Hai; Fisher, Mathew; Lung, Oliver; Berhane, Yohannes
EPI2236694	PB1	Canada	2022-Jul-19	EPI_ISL_16023374	A/Skunk/AB/FAV-0897-02/2022	Alberta Agriculture and Forestry, Government of Alberta	Canadian Food Inspection Agency	Alkie, Tamiru; Hicks, Mark; Pybuse, Margo J; Xu, Wanhong; Hisanaga, Tamiko; Suderman, Suderman; Koziuk, Janice; Kruczkiewicz, Peter; Nguyen, Hoang Hai; Fisher, Mathew; Lung, Oliver; Berhane, Yohannes
EPI2236686	PB1	Canada	2022-Jun-28	EPI_ISL_16023372	A/Skunk/AB/FAV-0897-01/2022	Alberta Agriculture and Forestry, Government of Alberta	Canadian Food Inspection Agency	Alkie, Tamiru; Hicks, Mark; Pybuse, Margo J; Xu, Wanhong; Hisanaga, Tamiko; Suderman, Suderman; Koziuk, Janice; Kruczkiewicz, Peter; Nguyen, Hoang Hai; Fisher, Mathew; Lung, Oliver; Berhane, Yohannes
EPI2150622	PB1	Sweden	2022-Jun-29	EPI_ISL_14810369	A/porpoise /Sweden/SVA220712SZ0367/FB002184/O-2022	Swedish Veterinary Agency (SVA)	Swedish Veterinary Agency (SVA)
EPI1958455	PB1	Netherlands	2022-Jan-08	EPI_ISL_8799320	A/polecat/Netherlands/22000516-003/2022	Wageningen Bioveterinary Research	Wageningen Bioveterinary Research	Beerens, Nancy; Harders, Frank; Pritz-Verschuren, Sylvia; Roose, Marit; Venema, Sandra; Germeraad, Evelien; Engelsma, Marc; Heutink, Rene
EPI2296207	PB1	Belgium	2022-Dec-08	EPI_ISL_16547666	A/Mustela_furo/Belgium/14312-0002/2022	Sciensano - Animal Infectious Diseases	Sciensano, Department of Animal Infectious Diseases	Van Borm, Steven; Roupie, Virginie; Hostyn, Pierre; Lambrecht, Benedicte; Steensels, Mieke
EPI2296195	PB1	Belgium	2022-Dec-08	EPI_ISL_16547552	A/Mustela_furo/Belgium/14312-0001/2022	Sciensano - Animal Infectious Diseases	Sciensano, Department of Animal Infectious Diseases	Van Borm, Steven; Roupie, Virginie; Hostyn, Pierre; Lambrecht, Benedicte; Steensels, Mieke
EPI1995130	PB1	Slovenia	2022-Jan-05	EPI_ISL_11007536	A/ferret/Slovenia/308MZ_22VIR777-9/2022	Beijing Genomics Institute (BGI)	Istituto Zooprofilattico Sperimentale delle Venezie	Slavec, B.; Ra?nik, J.; Krape?, U.; ?labravec, Z.; A?ko, J.; Cociancich, V.; Paller, T.; Vidrih, ?.; Rojs, O.Z.; Arseniev, S.; Groza, O.; Barbierato, G.; Zecchin, B.; Fusaro, A.; Schivo, A.; Salviato, A.; Palumbo, E.; Giussani, E.; Monne, I.; Terregino, C.
EPI2611373	PB1	Poland	2023-Jun-21	EPI_ISL_17956379	A/domestic_cat/Poland/H255-M/2023	National Veterinary Research Institut Poland, PIWet-PIB	National Veterinary Research Institut Poland, PIWet-PIB	Edyta,≈öwiƒôto≈Ñ; Katarzyna,Doma≈Ñska-Blicharz; Aleksandra,Giza; Marta,Pietruk; Karolina,Tarasiuk; Krzysztof,Wyrostek; Natalia, Sty≈õ-Fijo≈Ç
EPI2837121	PB2	Finland	2023-Sep-20	EPI_ISL_18618767	A/mink/Finland/3078/2023	Finnish Food Authority	Finnish Food Authority	Kauppinen, Ari; Kareinen, Lauri; Tammiranta, Niina; Kantala, Tuija; Fusaro, Alice; Gadd, Tuija
EPI2837119	PB2	Finland	2023-Sep-20	EPI_ISL_18618766	A/mink/Finland/3081/2023	Finnish Food Authority	Finnish Food Authority	Kauppinen, Ari; Kareinen, Lauri; Tammiranta, Niina; Kantala, Tuija; Fusaro, Alice; Gadd, Tuija
EPI2837101	PB2	Finland	2023-Sep-20	EPI_ISL_18618701	A/mink/Finland/3076/2023	Finnish Food Authority	Finnish Food Authority	Kauppinen, Ari; Kareinen, Lauri; Tammiranta, Niina; Kantala, Tuija; Fusaro, Alice; Gadd, Tuija
EPI2837077	PB2	Finland	2023-Aug-05	EPI_ISL_18618377	A/mink/Finland/688/2023	Finnish Food Authority	Finnish Food Authority	Kauppinen, Ari; Kareinen, Lauri; Tammiranta, Niina; Kantala, Tuija; Fusaro, Alice; Gadd, Tuija
EPI2755519	PB2	Finland	2023-Aug-05	EPI_ISL_18292966	A/mink/Finland/710/2023	Finnish Food Authority	Finnish Food Authority	Kauppinen, Ari; Kareinen, Lauri; Tammiranta, Niina; Kantala, Tuija; Fusaro, Alice; Giussani, Edoardo; Gadd, Tuija
EPI2755511	PB2	Finland	2023-Aug-05	EPI_ISL_18292965	A/mink/Finland/709/2023	Finnish Food Authority	Finnish Food Authority	Kauppinen, Ari; Kareinen, Lauri; Tammiranta, Niina; Kantala, Tuija; Fusaro, Alice; Giussani, Edoardo; Gadd, Tuija
EPI2755418	PB2	Finland	2023-Jul-03	EPI_ISL_18292952	A/mink/Finland/506/2023	Finnish Food Authority	Finnish Food Authority	Kauppinen, Ari; Kareinen, Lauri; Tammiranta, Niina; Kantala, Tuija; Fusaro, Alice; Galiano, Monica; Ikonen, Niina; Lindh, Erika; Gadd, Tuija
EPI2536812	PB2	Netherlands	2022-Jan-16	EPI_ISL_17580930	A/Stone Marten/Netherlands/1/2022	Erasmus Medical Center	Erasmus Medical Center	Vuong,O;Thewessen, S;Bellido-Martin,A.B; Chestakova, I; Sikkema, R;Fouchier, R.A.M.
EPI2513412	PB2	Canada	2022-Dec-26	EPI_ISL_17494319	A/American crow/PEI/FAV-0019-01/2022	Atlantic Veterinary College, University of Prince Edward Island	Canadian Food Inspection Agency	Parma, L; Hisanaga, T; Xu, W; Alkie, T; Fisher, M; Lung, O; Yason, C; Jones, M; Berhane, Y
EPI2197229	PB2	Finland	2021-Sep-01	EPI_ISL_15518270	A/otter/Finland/2860_21VIR9619-5/2021	Finnish Food Authority	Istituto Zooprofilattico Sperimentale Delle Venezie	Tammiranta, N.;Kantala, T.;Laamanen, I.;Gadd, T.;Zecchin, B.;Fusaro, A.;Schivo, A.;Salviato, A.;Palumbo, E.;Milani, A.;Giussani, E.;Pastori, A.;Monne, I.;Terregino, C.
EPI2197221	PB2	Finland	2022-Feb-01	EPI_ISL_15518269	A/lynx/Finland/Vi209-22_22VIR3127-2/2022	Finnish Food Authority	Istituto Zooprofilattico Sperimentale Delle Venezie	Tammiranta, N.;Kantala, T.;Laamanen, I.;Gadd, T.;Zecchin, B.;Fusaro, A.;Schivo, A.;Salviato, A.;Palumbo, E.;Milani, A.;Giussani, E.;Pastori, A.;Monne, I.;Terregino, C.
EPI1987255	PB2	Netherlands	2022-Feb-13	EPI_ISL_10220432	A/badger/Netherlands/22003078-004/2022	Wageningen Bioveterinary Research	Wageningen Bioveterinary Research	Beerens, Nancy; Harders, Frank; Pritz-Verschuren, Sylvia; Roose, Marit; Venema, Sandra; Germeraad, Evelien; Engelsma, Marc; Heutink, Rene
EPI1987231	PB2	Netherlands	2022-Feb-09	EPI_ISL_10220429	A/polecat/Netherlands/22002792-005/2022	Wageningen Bioveterinary Research	Wageningen Bioveterinary Research	Beerens, Nancy; Harders, Frank; Pritz-Verschuren, Sylvia; Roose, Marit; Venema, Sandra; Germeraad, Evelien; Engelsma, Marc; Heutink, Rene
EPI1981001	PB2	Netherlands	2022-Jan-24	EPI_ISL_9616266	A/polecat/Netherlands/22002047-001/2022	Wageningen Bioveterinary Research	Wageningen Bioveterinary Research	Beerens, Nancy; Harders, Frank; Pritz-Verschuren, Sylvia; Roose, Marit; Venema, Sandra; Germeraad, Evelien; Engelsma, Marc; Heutink, Rene
EPI2780166	PB2	Korea, Republic of	2023-Jul-04	EPI_ISL_18102701	A/feline/South Korea/SNU-02/2023			K,Lee; M,Yeom; T,Vu; Q,Do; W,NA; M,Lee; D,Jeong; D,Cheon; D,Song
EPI2780155	PB2	Korea, Republic of	2023-Jul-04	EPI_ISL_18102700	A/feline/South Korea/SNU-01/2023			K,Lee; M,Yeom; T,Vu; Q,Do; W,NA; M,Lee; D,Jeong; D,Cheon; D,Song
EPI2652227	PB2	Poland	2023-Jun-17	EPI_ISL_18033408	A/caracal/Poland/H303-P/2023	National Veterinary Research Institut Poland, PIWet-PIB	National Veterinary Research Institut Poland, PIWet-PIB	Swieton,Edyta;Tarasiuk,Karolina;Wyrostek,Krzysztof;Stys-Fijol,Natalia;Domanska-Blicharz,Katarzyna
EPI2597248	PB2	Peru	2023-Feb-08	EPI_ISL_17805999	A/lion/Peru/AIS0554/2023			Cruz,C.D., Conza,L.B., Espejo,V., Troncos,G., Perez,D.R., Marcelo,O.L., Schilling,M.; Tinoco,Y.
EPI3260241	PB2	United States	2024-Apr-01	EPI_ISL_19094506	A/mountain lion/Montana/24_010315-001/2024	United States Department of Agriculture, Agricultural Research Service, National Animal Disease Center	United States Department of Agriculture, Agricultural Research Service, National Animal Disease Center	T.,Nguyen; C.,Hutter; A.,Markin; M.,Thomas; K.,Lantz; M.L.,Killian; G.M.,Janzen; S.,Vijendran; S.,Wagle; B.,Inderski; D.R.,Magstadt; G.,Li; D.G.,Diel; E.A.,Frye; K.M.,Dimitrov; A.K.,Swinford; A.C.,Thompson; K.R.,Snevik; D.L.,Suarez; E.,Spackman; S.M.,Lakin; S.,C; K.R.,Johnson; A.L.,Baker; Robbe-S.,Austerman; M.K.,Torchetti; Anderson,T.K.
EPI3260224	PB2	United States	2024-Mar-11	EPI_ISL_19094504	A/skunk/Montana/24_007939-001/2024	United States Department of Agriculture, Agricultural Research Service, National Animal Disease Center	United States Department of Agriculture, Agricultural Research Service, National Animal Disease Center	T.,Nguyen; C.,Hutter; A.,Markin; M.,Thomas; K.,Lantz; M.L.,Killian; G.M.,Janzen; S.,Vijendran; S.,Wagle; B.,Inderski; D.R.,Magstadt; G.,Li; D.G.,Diel; E.A.,Frye; K.M.,Dimitrov; A.K.,Swinford; A.C.,Thompson; K.R.,Snevik; D.L.,Suarez; E.,Spackman; S.M.,Lakin; S.,C; K.R.,Johnson; A.L.,Baker; Robbe-S.,Austerman; M.K.,Torchetti; Anderson,T.K.
EPI3260201	PB2	United States	2024-Feb-23	EPI_ISL_19094501	A/skunk/Washington/24_005959-001/2024	United States Department of Agriculture, Agricultural Research Service, National Animal Disease Center	United States Department of Agriculture, Agricultural Research Service, National Animal Disease Center	T.,Nguyen; C.,Hutter; A.,Markin; M.,Thomas; K.,Lantz; M.L.,Killian; G.M.,Janzen; S.,Vijendran; S.,Wagle; B.,Inderski; D.R.,Magstadt; G.,Li; D.G.,Diel; E.A.,Frye; K.M.,Dimitrov; A.K.,Swinford; A.C.,Thompson; K.R.,Snevik; D.L.,Suarez; E.,Spackman; S.M.,Lakin; S.,C; K.R.,Johnson; A.L.,Baker; Robbe-S.,Austerman; M.K.,Torchetti; Anderson,T.K.
EPI3260184	PB2	United States	2024-Feb-23	EPI_ISL_19094499	A/skunk/Washington/24_005959-003/2024	United States Department of Agriculture, Agricultural Research Service, National Animal Disease Center	United States Department of Agriculture, Agricultural Research Service, National Animal Disease Center	T.,Nguyen; C.,Hutter; A.,Markin; M.,Thomas; K.,Lantz; M.L.,Killian; G.M.,Janzen; S.,Vijendran; S.,Wagle; B.,Inderski; D.R.,Magstadt; G.,Li; D.G.,Diel; E.A.,Frye; K.M.,Dimitrov; A.K.,Swinford; A.C.,Thompson; K.R.,Snevik; D.L.,Suarez; E.,Spackman; S.M.,Lakin; S.,C; K.R.,Johnson; A.L.,Baker; Robbe-S.,Austerman; M.K.,Torchetti; Anderson,T.K.
EPI3259737	PB2	United States	2024-Mar-19	EPI_ISL_19094443	A/feline/Montana/24-009038-001/2024	National Veterinary Services Laboratories - USDA	National Veterinary Services Laboratories - USDA	Aufderhar,Matthew;Franzen,Kerrie;Killian,Mary;Lantz,Kristina;Stuber,Tod;Hicks,Jessica;Norris,Cameron
EPI3158796	PB2	United States	2024-Feb-23	EPI_ISL_19014400	A/skunk/New Mexico/24-006483-001/2024	National Veterinary Services Laboratories - USDA	National Veterinary Services Laboratories - USDA	Aufderhar,Matthew;Franzen,Kerrie;Love,Emily;Killian,Mary;Lantz,Kristina;Stuber,Tod;Hicks,Jessica;Norris,Cameron
EPI2906705	PB2	France	2022-Nov-01	EPI_ISL_18750109	A/tibetan blue bear/France/CHUT-0007R2/2022	Centre Hospitalier Universitaire de Toulouse	Centre Hospitalier Universitaire de Toulouse	Bessiere,P., Gaide,N., Crispo,M., Dirat,M., Croville,G., Le Loc'h,G.; Guerin,J.-L.
EPI2895492	PB2	United States	2023-Aug-19	EPI_ISL_18737559	A/harbor seal/Washington/23-025744-002/2023	National Veterinary Services Laboratories - USDA	National Veterinary Services Laboratories - USDA	Franzen,Kerrie;Love,Emily;Ozella,Mikaela;Killian,Mary;Lantz,Kristina;Stuber,Tod;Hicks,Jessica;Norris,Cameron
EPI2895484	PB2	United States	2023-Aug-19	EPI_ISL_18737558	A/harbor seal/Washington/23-025744-001/2023	National Veterinary Services Laboratories - USDA	National Veterinary Services Laboratories - USDA	Franzen,Kerrie;Love,Emily;Ozella,Mikaela;Killian,Mary;Lantz,Kristina;Stuber,Tod;Hicks,Jessica;Norris,Cameron
EPI2895020	PB2	United States	2023-Aug-13	EPI_ISL_18731638	A/harbor seal/Washington/23-027069-002/2023	National Veterinary Services Laboratories - USDA	National Veterinary Services Laboratories - USDA	Franzen,Kerrie;Love,Emily;Ozella,Mikaela;Killian,Mary;Lantz,Kristina;Stuber,Tod;Hicks,Jessica;Norris,Cameron
EPI2894996	PB2	United States	2023-Aug-25	EPI_ISL_18731622	A/harbor seal/Washington/23-025991-001/2023	National Veterinary Services Laboratories - USDA	National Veterinary Services Laboratories - USDA	Franzen,Kerrie;Love,Emily;Ozella,Mikaela;Killian,Mary;Lantz,Kristina;Stuber,Tod;Hicks,Jessica;Norris,Cameron
EPI2894988	PB2	United States	2023-Aug-29	EPI_ISL_18731621	A/harbor seal/Washington/23-026504-002/2023	National Veterinary Services Laboratories - USDA	National Veterinary Services Laboratories - USDA	Franzen,Kerrie;Love,Emily;Ozella,Mikaela;Killian,Mary;Lantz,Kristina;Stuber,Tod;Hicks,Jessica;Norris,Cameron
EPI2894980	PB2	United States	2023-Aug-29	EPI_ISL_18731620	A/harbor seal/Washington/23-026504-001/2023	National Veterinary Services Laboratories - USDA	National Veterinary Services Laboratories - USDA	Franzen,Kerrie;Love,Emily;Ozella,Mikaela;Killian,Mary;Lantz,Kristina;Stuber,Tod;Hicks,Jessica;Norris,Cameron
EPI2856659	PB2	Canada	2023-Apr-20	EPI_ISL_18665592	A/Striped_Skunk/BC/AIVPHL-1083/2023	B.C. Centre for Disease Control	Public Health Agency of Canada	Himsworth, Chelsea; Prystajecky,Natalie; Tyson,John; Jassem,Agatha; Kuchinski,Kevin; Coombe, Michelle; Lee,Tracy; Azana,Rob; Fung,Janet; Chan,Michael; Cheung,Branco; Caleta,Jessica; Tsang,Frankie; Yang,Kevin; Russell,Shannon; Zlosnik,James; Hoang,Linda
EPI2856636	PB2	Canada	2023-Apr-20	EPI_ISL_18665588	A/Striped_Skunk/BC/AIVPHL-1082/2023	B.C. Centre for Disease Control	Public Health Agency of Canada	Himsworth, Chelsea; Prystajecky,Natalie; Tyson,John; Jassem,Agatha; Kuchinski,Kevin; Coombe, Michelle; Lee,Tracy; Azana,Rob; Fung,Janet; Chan,Michael; Cheung,Branco; Caleta,Jessica; Tsang,Frankie; Yang,Kevin; Russell,Shannon; Zlosnik,James; Hoang,Linda
EPI2856235	PB2	Canada	2023-Mar-09	EPI_ISL_18665535	A/Striped_Skunk/BC/AIVPHL-977/2023	B.C. Centre for Disease Control	Public Health Agency of Canada	Himsworth, Chelsea; Prystajecky,Natalie; Tyson,John; Jassem,Agatha; Kuchinski,Kevin; Coombe, Michelle; Lee,Tracy; Azana,Rob; Fung,Janet; Chan,Michael; Cheung,Branco; Caleta,Jessica; Tsang,Frankie; Yang,Kevin; Russell,Shannon; Zlosnik,James; Hoang,Linda
EPI2856211	PB2	Canada	2023-Mar-09	EPI_ISL_18665532	A/Striped_Skunk/BC/AIVPHL-976/2023	B.C. Centre for Disease Control	Public Health Agency of Canada	Himsworth, Chelsea; Prystajecky,Natalie; Tyson,John; Jassem,Agatha; Kuchinski,Kevin; Coombe, Michelle; Lee,Tracy; Azana,Rob; Fung,Janet; Chan,Michael; Cheung,Branco; Caleta,Jessica; Tsang,Frankie; Yang,Kevin; Russell,Shannon; Zlosnik,James; Hoang,Linda
EPI2856187	PB2	Canada	2023-Mar-06	EPI_ISL_18665529	A/Striped_Skunk/BC/AIVPHL-975/2023	B.C. Centre for Disease Control	Public Health Agency of Canada	Himsworth, Chelsea; Prystajecky,Natalie; Tyson,John; Jassem,Agatha; Kuchinski,Kevin; Coombe, Michelle; Lee,Tracy; Azana,Rob; Fung,Janet; Chan,Michael; Cheung,Branco; Caleta,Jessica; Tsang,Frankie; Yang,Kevin; Russell,Shannon; Zlosnik,James; Hoang,Linda
EPI2816117	PB2	Denmark	2023-Apr-29	EPI_ISL_18594303	A_red_fox_Denmark_08303-1.01_2023-04-29	Statens Serumm Institute	Statens Serum Institute	Hjulsager,C;Liang,Y
EPI2512569	PB2	Canada	2022-Jun-14	EPI_ISL_17478645	A/Black Bear/QC/FAV-0902/2022	Laboratoire de sant√© animale Minist√®re de l'Agriculture, des P√™cheries et de l'A	Canadian Food Inspection Agency	Koziuk, J; Hisanaga, T; Xu, W; Alkie, T; Lung, O; Fisher, M; Nadeau, M.S; Lair, S; Berhane, Y
EPI2512500	PB2	Canada	2022-Jun-24	EPI_ISL_17478584	A/Black Bear/QC/FAV-0935/2022	Laboratoire de sant√© animale Minist√®re de l'Agriculture, des P√™cheries et de l'A	Canadian Food Inspection Agency	Koziuk, J; Hisanaga, T; Xu, W; Alkie, T; Lung, O; Fisher, M; Nadeau, M.S; Lair, S; Berhane, Y
EPI2509904	PB2	United Kingdom	2022-Jun-19	EPI_ISL_17465835	A/harbour_seal/Scotland/054948/2022	Animal and Plant Health Agency (APHA)	Animal and Plant Health Agency (APHA)
EPI2509896	PB2	United Kingdom	2023-Feb-20	EPI_ISL_17465834	A/common_dolphin/England/040499/2023	Animal and Plant Health Agency (APHA)	Animal and Plant Health Agency (APHA)
EPI2509888	PB2	United Kingdom	2023-Feb-20	EPI_ISL_17465833	A/common_dolphin/Wales/040498/2023	Animal and Plant Health Agency (APHA)	Animal and Plant Health Agency (APHA)
EPI2509880	PB2	United Kingdom	2023-Feb-06	EPI_ISL_17465832	A/harbour_porpoise/England/040497/2023	Animal and Plant Health Agency (APHA)	Animal and Plant Health Agency (APHA)
EPI2507010	PB2	United States	2023-Jan-27	EPI_ISL_17424646	A/striped skunk/Kansas/W23-094/2023	St. Jude Center of Excellence for Influenza Research and Response - CEIRR Influenza Data Processing and Communication Center	St. Jude Center of Excellence for Influenza Research and Response - CEIRR Influenza Data Processing and Communication Center	Poulson,R., Stallknecht,D., Rubrum,A., Jeevan,T., Walker,D. and Webby,R.
EPI2506858	PB2	United States	2022-Jul-07	EPI_ISL_17424627	A/harbor seal/Maine/MME-185-ns/2022			Fauquier,D.; Doughty,L.A.; Rubrum,A.; Jeevan,T.; Walker,D.; Webby,R.
EPI2506850	PB2	United States	2022-Jun-24	EPI_ISL_17424626	A/harbor seal/Maine/MME-117-ns/2022			Fauquier,D.; Doughty,L.A.; Rubrum,A.; Jeevan,T.; Walker,D.; Webby,R.
EPI2506842	PB2	United States	2022-Jul-02	EPI_ISL_17424625	A/harbor seal/Maine/MME-150-L/2022			Fauquier,D.; Doughty,L.A.; Rubrum,A.; Jeevan,T.; Walker,D.; Webby,R.
EPI2506834	PB2	United States	2022-Jul-07	EPI_ISL_17424624	A/harbor seal/Maine/MME-185-L/2022	St. Jude Center of Excellence for Influenza Research and Response - CEIRR Influenza Data Processing and Communication Center	St. Jude Center of Excellence for Influenza Research and Response - CEIRR Influenza Data Processing and Communication Center	Fauquier,D., Doughty,L.A., Rubrum,A., Jeevan,T., Walker,D. and Webby,R.
EPI2506826	PB2	United States	2022-Jul-02	EPI_ISL_17424623	A/harbor seal/Maine/MME-150-ns/2022			Fauquier,D.; Doughty,L.A.; Rubrum,A.; Jeevan,T.; Walker,D.; Webby,R.
EPI2506818	PB2	United States	2022-Jul-02	EPI_ISL_17424622	A/harbor seal/Maine/MME-147-L/2022	St. Jude Center of Excellence for Influenza Research and Response - CEIRR Influenza Data Processing and Communication Center	St. Jude Center of Excellence for Influenza Research and Response - CEIRR Influenza Data Processing and Communication Center	Fauquier,D., Doughty,L.A., Rubrum,A., Jeevan,T., Walker,D. and Webby,R.
EPI2473781	PB2	United States	2022-Jul-22	EPI_ISL_17260689	A/skunk/Idaho/22-023547-001/2022	National Veterinary Services Laboratories - USDA	National Veterinary Services Laboratories - USDA	Chinh,Thanh;Franzen,Kerrie;Love,Emily;Killian,Mary;Koster,Leo;Lantz,Kristina;Stuber,Tod;Hicks,Jessica;Norris,Cameron
EPI2473773	PB2	United States	2022-Jul-06	EPI_ISL_17260688	A/raccoon/Michigan/22-021733-010/2022	National Veterinary Services Laboratories - USDA	National Veterinary Services Laboratories - USDA	Chinh,Thanh;Franzen,Kerrie;Love,Emily;Killian,Mary;Koster,Leo;Lantz,Kristina;Stuber,Tod;Hicks,Jessica;Norris,Cameron
EPI2473697	PB2	United States	2022-Apr-14	EPI_ISL_17260683	A/fisher/Wisconsin/22-019946-001/2022	National Veterinary Services Laboratories - USDA	National Veterinary Services Laboratories - USDA	Chinh,Thanh;Franzen,Kerrie;Love,Emily;Killian,Mary;Koster,Leo;Lantz,Kristina;Stuber,Tod;Hicks,Jessica;Norris,Cameron
EPI2473683	PB2	United States	2022-Jun-07	EPI_ISL_17260682	A/skunk/Washington/22-019274-004/2022	National Veterinary Services Laboratories - USDA	National Veterinary Services Laboratories - USDA	Chinh,Thanh;Franzen,Kerrie;Love,Emily;Killian,Mary;Koster,Leo;Lantz,Kristina;Stuber,Tod;Hicks,Jessica;Norris,Cameron
EPI2473655	PB2	United States	2022-Jun-06	EPI_ISL_17260680	A/skunk/Idaho/22-018976-004/2022	National Veterinary Services Laboratories - USDA	National Veterinary Services Laboratories - USDA	Chinh,Thanh;Franzen,Kerrie;Love,Emily;Killian,Mary;Koster,Leo;Lantz,Kristina;Stuber,Tod;Hicks,Jessica;Norris,Cameron
EPI2473585	PB2	United States	2022-May-03	EPI_ISL_17260675	A/coyote/Michigan/22-017507-005/2022	National Veterinary Services Laboratories - USDA	National Veterinary Services Laboratories - USDA	Chinh,Thanh;Franzen,Kerrie;Love,Emily;Killian,Mary;Koster,Leo;Lantz,Kristina;Stuber,Tod;Hicks,Jessica;Norris,Cameron
EPI2473529	PB2	United States	2022-May-25	EPI_ISL_17260671	A/Virginia opossum/Iowa/22-016780-003/2022	National Veterinary Services Laboratories - USDA	National Veterinary Services Laboratories - USDA	Chinh,Thanh;Franzen,Kerrie;Love,Emily;Killian,Mary;Koster,Leo;Lantz,Kristina;Stuber,Tod;Hicks,Jessica;Norris,Cameron
EPI2469496	PB2	Belgium	2023-Mar-02	EPI_ISL_17246921	A/Mustela_putorius/Belgium/01922_0001/2023	Sciensano - Animal Infectious Diseases	Sciensano, Department of Animal Infectious Diseases	Van Borm, Steven; Roupie, Virginie; Hostyn, Pierre; Mathijs, Elisabeth; Lambrecht, Benedicte; Steensels, Mieke
EPI2274963	PB2	Canada	2022-May-30	EPI_ISL_16367971	A/Striped Skunk/SK/FAV-0824-01/2022	Western College of Veterinary Medicine, University of Saskatchewan	Canadian Food Inspection Agency
EPI2260731	PB2	United States	2022-Jan-01	EPI_ISL_16271848	A/black bear/Alaska/22-036396-001/2022	National Veterinary Services Laboratories - USDA	National Veterinary Services Laboratories - USDA	Chinh,Thanh;Love, Emily;Franzen,Kerrie;Killian,Mary;Koster,Leo;Lantz,Kristina;Stuber,Tod;Hicks,Jessica
EPI2260627	PB2	United States	2022-Nov-04	EPI_ISL_16271835	A/striped skunk/Idaho/22-037165-002/2022	National Veterinary Services Laboratories - USDA	National Veterinary Services Laboratories - USDA	Chinh,Thanh;Love, Emily;Franzen,Kerrie;Killian,Mary;Koster,Leo;Lantz,Kristina;Stuber,Tod;Hicks,Jessica
EPI2257433	PB2	United States	2022-Mar-30	EPI_ISL_16212269	A/bottlenose dolphin/Florida/UFTt2203/2022			Murawski,A.; Allison,A.; Ossiboff,R.; Fabrizio,T.; Jeevan,T.; Mukherjee,N.; Killian,M.L.; Torchetti,M.; Walsh,M.; Webby,R.
EPI2235581	PB2	Canada	2022-May-18	EPI_ISL_16003268	A/Skunk/MB/FAV-470/2022	Manitoba Agriculture	Canadian Food Inspection Agency	Alkie, Tamiru; Cox, Sherri; Pople, Neil; Xu, Wanhong; Hisanaga, Tamiko; Suderman, Suderman; Koziuk, Janice; Kruczkiewicz, Peter; Nguyen, Hoang Hai; Fisher, Mathew; Lung, Oliver; Berhane, Yohannes
EPI2182140	PB2	United States	2022-Mar-30	EPI_ISL_15078255	A/dolphin/Florida/22-025319-002/2022	National Veterinary Services Laboratories - USDA	National Veterinary Services Laboratories - USDA	Chinh,Thanh;Love, Emily;Franzen,Kerrie;Killian,Mary;Koster,Leo;Lantz,Kristina;Stuber,Tod;Hicks,Jessica
EPI2182132	PB2	United States	2022-Jun-07	EPI_ISL_15078254	A/skunk/Washington/22-019274-001/2022	National Veterinary Services Laboratories - USDA	National Veterinary Services Laboratories - USDA	Chinh,Thanh;Love, Emily;Franzen,Kerrie;Killian,Mary;Koster,Leo;Lantz,Kristina;Stuber,Tod;Hicks,Jessica
EPI2182116	PB2	United States	2022-Jun-08	EPI_ISL_15078252	A/raccoon/Washington/22-018406-002/2022	National Veterinary Services Laboratories - USDA	National Veterinary Services Laboratories - USDA	Chinh,Thanh;Love, Emily;Franzen,Kerrie;Killian,Mary;Koster,Leo;Lantz,Kristina;Stuber,Tod;Hicks,Jessica
EPI2182100	PB2	United States	2022-May-25	EPI_ISL_15078250	A/Virginia opossum/Iowa/22-016780-001/2022	National Veterinary Services Laboratories - USDA	National Veterinary Services Laboratories - USDA	Chinh,Thanh;Love, Emily;Franzen,Kerrie;Killian,Mary;Koster,Leo;Lantz,Kristina;Stuber,Tod;Hicks,Jessica
EPI2182084	PB2	United States	2022-May-24	EPI_ISL_15078248	A/bobcat/Wisconsin/22-016051-001/2022	National Veterinary Services Laboratories - USDA	National Veterinary Services Laboratories - USDA	Chinh,Thanh;Love, Emily;Franzen,Kerrie;Killian,Mary;Koster,Leo;Lantz,Kristina;Stuber,Tod;Hicks,Jessica
EPI2181749	PB2	United States	2022-Mar-30	EPI_ISL_15069397	A/bottlenose dolphin/Florida/UFTt2203/2022	University of Florida, College of Veterinary Medicine	St. Jude Children's Research Hospital	Murawski, Allison; Allison, Andrew; Ossiboff, Robert; Fabrizio, Thomas; Jeevan, Trushar; Killian, Mary Lea; Torchetti, Mia; Walsh, Michael; Webby, Richard
EPI2158645	PB2	United Kingdom	2022-Jan-01	EPI_ISL_14864642	A/otter/Scotland/M100366/2022	Animal and Plant Health Agency (APHA)	Animal and Plant Health Agency (APHA)
EPI2158637	PB2	United Kingdom	2022-Jan-01	EPI_ISL_14864641	A/otter/Scotland/M100839/2022	Animal and Plant Health Agency (APHA)	Animal and Plant Health Agency (APHA)
EPI2109940	PB2	Japan	2022-Apr-01	EPI_ISL_14070455	A/tanuki/Hokkaido/1/2022	Graduate School of Veterinary Medicine, Hokkaido University	Graduate School of Veterinary Medicine, Hokkaido University	Yoshihiro, Sakoda; Takahiro, Hiono; Norikazu, Isoda
EPI2455325	PB2	Germany	2023-Feb-27	EPI_ISL_17167249	A/grey seal/Germany-SH/AI01973/2023	Landeslabor Schleswig-Holstein	Friedrich-Loeffler-Institut
EPI2398408	PB2	United Kingdom	2022-Jul-25	EPI_ISL_16904554	A/Harbour_Seal/Scotland/162925/2022	Animal and Plant Health Agency (APHA)	Animal and Plant Health Agency (APHA)
EPI2398400	PB2	United Kingdom	2022-Mar-12	EPI_ISL_16904553	A/Harbour_Seal/Scotland/162919/2022	Animal and Plant Health Agency (APHA)	Animal and Plant Health Agency (APHA)
EPI2310441	PB2	United States	2022-Jul-15	EPI_ISL_16632542	A/harbor seal/Maine/22-025072-002/2022	Cummings School of Veterinary Medicine at Tufts University	Cummings School of Veterinary Medicine at Tufts University	Chinh,Thanh; Franzen,Kerrie; Love,Emily; Killian,Mary; Lantz,Kristina; Hicks,Jessica; Norris, Cameron; Stuber,Tod; Sawatzki, Kaitlin; Puryear, Wendy; Foss, Alexa; Doughty,Linda; Runstadler, Jonathan
EPI2310433	PB2	United States	2022-Jul-09	EPI_ISL_16632541	A/harbor seal/Maine/22-022528-008/2022	Cummings School of Veterinary Medicine at Tufts University	Cummings School of Veterinary Medicine at Tufts University	Chinh,Thanh; Franzen,Kerrie; Love,Emily; Killian,Mary; Lantz,Kristina; Hicks,Jessica; Norris, Cameron; Stuber,Tod; Sawatzki, Kaitlin; Puryear, Wendy; Foss, Alexa; Doughty,Linda; Runstadler, Jonathan
EPI2310425	PB2	United States	2022-Jul-09	EPI_ISL_16632540	A/harbor seal/Maine/22-022528-006/2022	Cummings School of Veterinary Medicine at Tufts University	Cummings School of Veterinary Medicine at Tufts University	Chinh,Thanh; Franzen,Kerrie; Love,Emily; Killian,Mary; Lantz,Kristina; Hicks,Jessica; Norris, Cameron; Stuber,Tod; Sawatzki, Kaitlin; Puryear, Wendy; Foss, Alexa; Doughty,Linda; Runstadler, Jonathan
EPI2310417	PB2	United States	2022-Jul-08	EPI_ISL_16632539	A/harbor seal/Maine/22-022528-003/2022	Cummings School of Veterinary Medicine at Tufts University	Cummings School of Veterinary Medicine at Tufts University	Chinh,Thanh; Franzen,Kerrie; Love,Emily; Killian,Mary; Lantz,Kristina; Hicks,Jessica; Norris, Cameron; Stuber,Tod; Sawatzki, Kaitlin; Puryear, Wendy; Foss, Alexa; Doughty,Linda; Runstadler, Jonathan
EPI2110522	PB2	United States	2022-Jun-29	EPI_ISL_14098924	A/harbor seal/Maine/22-020983-007/2022	National Veterinary Services Laboratories - USDA	National Veterinary Services Laboratories - USDA	Chinh,Thanh;Franzen,Kerrie;Love, Emily;Killian,Mary;Koster,Leo;Lantz,Kristina;Torchetti,Mia;Stuber,Tod;Hicks,Jessica
EPI2110514	PB2	United States	2022-Jun-29	EPI_ISL_14098923	A/harbor seal/Maine/22-020983-006/2022	National Veterinary Services Laboratories - USDA	National Veterinary Services Laboratories - USDA	Chinh,Thanh;Franzen,Kerrie;Love, Emily;Killian,Mary;Koster,Leo;Lantz,Kristina;Torchetti,Mia;Stuber,Tod;Hicks,Jessica
EPI2110506	PB2	United States	2022-Jun-29	EPI_ISL_14098922	A/grey seal/Maine/22-020983-003/2022	National Veterinary Services Laboratories - USDA	National Veterinary Services Laboratories - USDA	Chinh,Thanh;Franzen,Kerrie;Love, Emily;Killian,Mary;Koster,Leo;Lantz,Kristina;Torchetti,Mia;Stuber,Tod;Hicks,Jessica
EPI2110498	PB2	United States	2022-Jun-29	EPI_ISL_14098921	A/harbor seal/Maine/22-020983-002/2022	National Veterinary Services Laboratories - USDA	National Veterinary Services Laboratories - USDA	Chinh,Thanh;Franzen,Kerrie;Love, Emily;Killian,Mary;Koster,Leo;Lantz,Kristina;Torchetti,Mia;Stuber,Tod;Hicks,Jessica
EPI2110490	PB2	United States	2022-Jun-29	EPI_ISL_14098920	A/harbor seal/Maine/22-020983-001/2022	National Veterinary Services Laboratories - USDA	National Veterinary Services Laboratories - USDA	Chinh,Thanh;Franzen,Kerrie;Love, Emily;Killian,Mary;Koster,Leo;Lantz,Kristina;Torchetti,Mia;Stuber,Tod;Hicks,Jessica
EPI2110482	PB2	United States	2022-Jun-27	EPI_ISL_14098919	A/harbor seal/Maine/22-020455-005/2022	National Veterinary Services Laboratories - USDA	National Veterinary Services Laboratories - USDA	Chinh,Thanh;Franzen,Kerrie;Love, Emily;Killian,Mary;Koster,Leo;Lantz,Kristina;Torchetti,Mia;Stuber,Tod;Hicks,Jessica
EPI2110474	PB2	United States	2022-Jun-26	EPI_ISL_14098918	A/harbor seal/Maine/22-020455-004/2022	National Veterinary Services Laboratories - USDA	National Veterinary Services Laboratories - USDA	Chinh,Thanh;Franzen,Kerrie;Love, Emily;Killian,Mary;Koster,Leo;Lantz,Kristina;Torchetti,Mia;Stuber,Tod;Hicks,Jessica
EPI2110466	PB2	United States	2022-Jun-22	EPI_ISL_14098917	A/harbor seal/Maine/22-020455-003/2022	National Veterinary Services Laboratories - USDA	National Veterinary Services Laboratories - USDA	Chinh,Thanh;Franzen,Kerrie;Love, Emily;Killian,Mary;Koster,Leo;Lantz,Kristina;Torchetti,Mia;Stuber,Tod;Hicks,Jessica
EPI2110458	PB2	United States	2022-Jun-24	EPI_ISL_14098916	A/harbor seal/Maine/22-020455-002/2022	National Veterinary Services Laboratories - USDA	National Veterinary Services Laboratories - USDA	Chinh,Thanh;Franzen,Kerrie;Love, Emily;Killian,Mary;Koster,Leo;Lantz,Kristina;Torchetti,Mia;Stuber,Tod;Hicks,Jessica
EPI2134832	PB2	United States	2022-Jun-24	EPI_ISL_14098915	A/harbor seal/Maine/22-020455-001/2022	National Veterinary Services Laboratories - USDA	National Veterinary Services Laboratories - USDA	Chinh,Thanh;Franzen,Kerrie;Love, Emily;Killian,Mary;Koster,Leo;Lantz,Kristina;Torchetti,Mia;Stuber,Tod;Hicks,Jessica
EPI2641359	PB2	Finland	2023-Jul-10	EPI_ISL_18011099	A/mink/Finland/512-23/2023	Finnish Food Authority	Finnish Institute for Health and Welfare, THL	Tuija,Kantala; Alice,Fusaro; Tuija,Gadd; Monica,Galiano; Niina,Ikonen; Lauri,Kareinen; Ari,Kauppinen; Erika,Lindh
EPI2291515	PB2	Spain	2022-Oct-26	EPI_ISL_16507096	A/mink/Spain/22VIR12774-14_3869-3/2022	Istituto Zooprofilattico Sperimentale delle Venezie, EU/OIE/Reference Laboratory and FAO Reference Centre for AI and ND	Istituto Zooprofilattico Sperimentale Delle Venezie	Ruano,M.J.; Rocha,A.; Sanchez,A.; Aguero,M.; Pastori, A.; Zecchin, B.; Fusaro, A.; Schivo, A.; Salviato, A.; Palumbo, E.; Giussani, E.; Monne, I.; Terregino, C.
EPI2291507	PB2	Spain	2022-Oct-26	EPI_ISL_16507095	A/mink/Spain/22VIR12774-13_3869-2/2022	Istituto Zooprofilattico Sperimentale delle Venezie, EU/OIE/Reference Laboratory and FAO Reference Centre for AI and ND	Istituto Zooprofilattico Sperimentale Delle Venezie	Ruano,M.J.; Rocha,A.; Sanchez,A.; Aguero,M.; Pastori, A.; Zecchin, B.; Fusaro, A.; Schivo, A.; Salviato, A.; Palumbo, E.; Giussani, E.; Monne, I.; Terregino, C.
EPI2236189	PB2	Canada	2022-May-19	EPI_ISL_16013982	A/Wild Mink/ON/FAV-0529-01/2022	Ontario Veterinary College, University of Guelph	Canadian Food Inspection Agency	Alkie, Tamiru; Cox, Sherri; Ojkic, Davor; Stevens, Brian; Xu, Wanhong; Hisanaga, Tamiko; Suderman, Suderman; Koziuk, Janice; Kruczkiewicz, Peter; Nguyen, Hoang Hai; Fisher, Mathew; Lung, Oliver; Berhane, Yohannes
EPI2220618	PB2	Spain	2022-Oct-18	EPI_ISL_15878542	A/Mink/Spain/3691-3_22VIR10586-9/2022	Laboratorio Central de Veterinaria	Istituto Zooprofilattico Sperimentale delle Venezie	Ruano, M.J.; Rocha, A.; Sanchez, A.; Aguero, M; Barbierato, G.; Zecchin, B.; Fusaro, A.; Schivo, A.; Salviato, A.; Palumbo, E.; Giussani, E.; Pastori, A.; Monne, I.; Terregino, C.
EPI2220610	PB2	Spain	2022-Oct-18	EPI_ISL_15878541	A/Mink/Spain/3691-2_22VIR10586-8/2022	Laboratorio Central de Veterinaria	Istituto Zooprofilattico Sperimentale delle Venezie	Ruano, M.J.; Rocha, A.; Sanchez, A.; Aguero, M; Barbierato, G.; Zecchin, B.; Fusaro, A.; Schivo, A.; Salviato, A.; Palumbo, E.; Giussani, E.; Pastori, A.; Monne, I.; Terregino, C.
EPI2220602	PB2	Spain	2022-Oct-18	EPI_ISL_15878540	A/Mink/Spain/3691-10_22VIR10586-11/2022	Laboratorio Central de Veterinaria	Istituto Zooprofilattico Sperimentale delle Venezie	Ruano, M.J.; Rocha, A.; Sanchez, A.; Aguero, M; Barbierato, G.; Zecchin, B.; Fusaro, A.; Schivo, A.; Salviato, A.; Palumbo, E.; Giussani, E.; Pastori, A.; Monne, I.; Terregino, C.
EPI2220594	PB2	Spain	2022-Oct-18	EPI_ISL_15878539	A/Mink/Spain/3691-8_22VIR10586-10/2022	Laboratorio Central de Veterinaria	Istituto Zooprofilattico Sperimentale delle Venezie	Ruano, M.J.; Rocha, A.; Sanchez, A.; Aguero, M; Barbierato, G.; Zecchin, B.; Fusaro, A.; Schivo, A.; Salviato, A.; Palumbo, E.; Giussani, E.; Pastori, A.; Monne, I.; Terregino, C.
EPI2652297	PB2	Poland	2023-Jan-01	EPI_ISL_18033418	A/domestic_cat/Poland/H322-M/2023	National Veterinary Research Institut Poland, PIWet-PIB	National Veterinary Research Institut Poland, PIWet-PIB	Swieton,Edyta;Tarasiuk,Karolina;Wyrostek,Krzysztof;Stys-Fijol,Natalia;Domanska-Blicharz,Katarzyna
EPI2652290	PB2	Poland	2023-Jan-01	EPI_ISL_18033417	A/domestic_cat/Poland/H321-M/2023	National Veterinary Research Institut Poland, PIWet-PIB	National Veterinary Research Institut Poland, PIWet-PIB	Swieton,Edyta;Tarasiuk,Karolina;Wyrostek,Krzysztof;Stys-Fijol,Natalia;Domanska-Blicharz,Katarzyna
EPI2652283	PB2	Poland	2023-Jan-01	EPI_ISL_18033416	A/domestic_cat/Poland/H320-M/2023	National Veterinary Research Institut Poland, PIWet-PIB	National Veterinary Research Institut Poland, PIWet-PIB	Swieton,Edyta;Tarasiuk,Karolina;Wyrostek,Krzysztof;Stys-Fijol,Natalia;Domanska-Blicharz,Katarzyna
EPI2652276	PB2	Poland	2023-Jan-01	EPI_ISL_18033415	A/domestic_cat/Poland/H319-M/2023	National Veterinary Research Institut Poland, PIWet-PIB	National Veterinary Research Institut Poland, PIWet-PIB	Swieton,Edyta;Tarasiuk,Karolina;Wyrostek,Krzysztof;Stys-Fijol,Natalia;Domanska-Blicharz,Katarzyna
EPI2652269	PB2	Poland	2023-Jul-06	EPI_ISL_18033414	A/domestic_cat/Poland/H314-W3/2023	National Veterinary Research Institut Poland, PIWet-PIB	National Veterinary Research Institut Poland, PIWet-PIB	Swieton,Edyta;Tarasiuk,Karolina;Wyrostek,Krzysztof;Stys-Fijol,Natalia;Domanska-Blicharz,Katarzyna
EPI2652262	PB2	Poland	2023-Jan-01	EPI_ISL_18033413	A/domestic_cat/Poland/H304-M2/2023	National Veterinary Research Institut Poland, PIWet-PIB	National Veterinary Research Institut Poland, PIWet-PIB	Swieton,Edyta;Tarasiuk,Karolina;Wyrostek,Krzysztof;Stys-Fijol,Natalia;Domanska-Blicharz,Katarzyna
EPI2652255	PB2	Poland	2023-Jan-01	EPI_ISL_18033412	A/domestic_cat/Poland/H304-M1/2023	National Veterinary Research Institut Poland, PIWet-PIB	National Veterinary Research Institut Poland, PIWet-PIB	Swieton,Edyta;Tarasiuk,Karolina;Wyrostek,Krzysztof;Stys-Fijol,Natalia;Domanska-Blicharz,Katarzyna
EPI2652248	PB2	Poland	2023-Jan-01	EPI_ISL_18033411	A/domestic_cat/Poland/H299-N/2023	National Veterinary Research Institut Poland, PIWet-PIB	National Veterinary Research Institut Poland, PIWet-PIB	Swieton,Edyta;Tarasiuk,Karolina;Wyrostek,Krzysztof;Stys-Fijol,Natalia;Domanska-Blicharz,Katarzyna
EPI2652241	PB2	Poland	2023-Jan-01	EPI_ISL_18033410	A/domestic_cat/Poland/H293-N/2023	National Veterinary Research Institut Poland, PIWet-PIB	National Veterinary Research Institut Poland, PIWet-PIB	Swieton,Edyta;Tarasiuk,Karolina;Wyrostek,Krzysztof;Stys-Fijol,Natalia;Domanska-Blicharz,Katarzyna
EPI2652234	PB2	Poland	2023-Jan-01	EPI_ISL_18033409	A/domestic_cat/Poland/H275k3-M/2023	National Veterinary Research Institut Poland, PIWet-PIB	National Veterinary Research Institut Poland, PIWet-PIB	Swieton,Edyta;Tarasiuk,Karolina;Wyrostek,Krzysztof;Stys-Fijol,Natalia;Domanska-Blicharz,Katarzyna
EPI2616227	PB2	Poland	2023-Jun-26	EPI_ISL_17971998	A/domestic_cat/Poland/H264-G/2023(H5N1)	National Veterinary Research Institut Poland, PIWet-PIB	National Veterinary Research Institut Poland, PIWet-PIB	Swieton, E.;Domanska-Blicharz, K.;Tarasiuk, K.; Wyrostek, K.;Stys-Fijol, N.
EPI2616219	PB2	Poland	2023-Jun-26	EPI_ISL_17971997	A/domestic_cat/Poland/H277-W1/2023(H5N1)	National Veterinary Research Institut Poland, PIWet-PIB	National Veterinary Research Institut Poland, PIWet-PIB	Swieton, E.;Domanska-Blicharz, K.;Tarasiuk, K.; Wyrostek, K.;Stys-Fijol, N.
EPI2616211	PB2	Poland	2023-Jun-25	EPI_ISL_17971996	A/domestic_cat/Poland/H271-W/2023(H5N1)	National Veterinary Research Institut Poland, PIWet-PIB	National Veterinary Research Institut Poland, PIWet-PIB	Swieton, E.;Domanska-Blicharz, K.;Tarasiuk, K.; Wyrostek, K.;Stys-Fijol, N.
EPI2616203	PB2	Poland	2023-Jun-25	EPI_ISL_17971995	A/domestic_cat/Poland/H270-W/2023(H5N1)	National Veterinary Research Institut Poland, PIWet-PIB	National Veterinary Research Institut Poland, PIWet-PIB	Swieton, E.;Domanska-Blicharz, K.;Tarasiuk, K.; Wyrostek, K.;Stys-Fijol, N.
EPI2616179	PB2	Poland	2023-Jun-26	EPI_ISL_17971992	A/domestic_cat/Poland/H263-G/2023(H5N1)	National Veterinary Research Institut Poland, PIWet-PIB	National Veterinary Research Institut Poland, PIWet-PIB	Swieton, E.;Domanska-Blicharz, K.;Tarasiuk, K.; Wyrostek, K.;Stys-Fijol, N.
EPI2616171	PB2	Poland	2023-Jun-24	EPI_ISL_17971991	A/domestic_cat/Poland/H257-G/2023(H5N1)	National Veterinary Research Institut Poland, PIWet-PIB	National Veterinary Research Institut Poland, PIWet-PIB	Swieton, E.;Domanska-Blicharz, K.;Tarasiuk, K.; Wyrostek, K.;Stys-Fijol, N.
EPI2616155	PB2	Poland	2023-Jun-21	EPI_ISL_17971989	A/domestic_cat/Poland/H255-M/2023(H5N1)	National Veterinary Research Institut Poland, PIWet-PIB	National Veterinary Research Institut Poland, PIWet-PIB	Swieton, E.;Domanska-Blicharz, K.;Tarasiuk, K.; Wyrostek, K.;Stys-Fijol, N.
EPI2610818	PB2	Poland	2023-Jun-19	EPI_ISL_17951056	A/domestic_cat/Poland/Kot1/2023	National Veterinary Research Institut Poland, PIWet-PIB	National Veterinary Research Institut Poland, PIWet-PIB	Edyta,≈öwiƒôto≈Ñ; Katarzyna,Doma≈Ñska-Blicharz; Aleksandra,Giza; Marta,Pietruk; Karolina,Tarasiuk; Krzysztof,Wyrostek; Natalia, Sty≈õ-Fijo≈Ç
EPI2610810	PB2	Poland	2023-Jun-20	EPI_ISL_17951055	A/domestic_cat/Poland/H247/2023	National Veterinary Research Institut Poland, PIWet-PIB	National Veterinary Research Institut Poland, PIWet-PIB	Edyta,≈öwiƒôto≈Ñ; Katarzyna,Doma≈Ñska-Blicharz; Aleksandra,Giza; Marta,Pietruk; Karolina,Tarasiuk; Krzysztof,Wyrostek; Natalia, Sty≈õ-Fijo≈Ç
EPI2610794	PB2	Poland	2023-Jun-22	EPI_ISL_17951053	A/domestic_cat/Poland/H254/2023	National Veterinary Research Institut Poland, PIWet-PIB	National Veterinary Research Institut Poland, PIWet-PIB	Edyta,≈öwiƒôto≈Ñ; Katarzyna,Doma≈Ñska-Blicharz; Aleksandra,Giza; Marta,Pietruk; Karolina,Tarasiuk; Krzysztof,Wyrostek; Natalia, Sty≈õ-Fijo≈Ç
EPI2610786	PB2	Poland	2023-Jun-22	EPI_ISL_17951052	A/domestic_cat/Poland/H253/2023	National Veterinary Research Institut Poland, PIWet-PIB	National Veterinary Research Institut Poland, PIWet-PIB	Edyta,≈öwiƒôto≈Ñ; Katarzyna,Doma≈Ñska-Blicharz; Aleksandra,Giza; Marta,Pietruk; Karolina,Tarasiuk; Krzysztof,Wyrostek; Natalia, Sty≈õ-Fijo≈Ç
EPI2610778	PB2	Poland	2023-Jun-22	EPI_ISL_17951051	A/domestic_cat/Poland/H252/2023	National Veterinary Research Institut Poland, PIWet-PIB	National Veterinary Research Institut Poland, PIWet-PIB	Edyta,≈öwiƒôto≈Ñ; Katarzyna,Doma≈Ñska-Blicharz; Aleksandra,Giza; Marta,Pietruk; Karolina,Tarasiuk; Krzysztof,Wyrostek; Natalia, Sty≈õ-Fijo≈Ç
EPI2610770	PB2	Poland	2023-Jun-22	EPI_ISL_17950995	A/domestic_cat/Poland/H249/2023	National Veterinary Research Institut Poland, PIWet-PIB	National Veterinary Research Institut Poland, PIWet-PIB	Edyta,≈öwiƒôto≈Ñ; Katarzyna,Doma≈Ñska-Blicharz; Aleksandra,Giza; Marta,Pietruk; Karolina,Tarasiuk; Krzysztof,Wyrostek; Natalia, Sty≈õ-Fijo≈Ç
EPI2603668	PB2	United States	2023-Mar-30	EPI_ISL_17821770	A/cat/Nebraska/23-010184-001/2023	Nebraska Veterinary Diagnostic Center	National Veterinary Services Laboratories - USDA	Chinh,Thanh;Franzen,Kerrie;Love,Emily;Ozella,Mikaela;Killian,Mary;Lantz,Kristina;Stuber,Tod;Hicks,Jessica;Norris,Cameron
EPI2281675	PB2	France	2022-Dec-24	EPI_ISL_16395206	A/cat/France/22P026544/2022	Anses (Ploufragan-Plouzan√©)	ANSES Agence Nationale De Securite Sanitaire De L‚Äôalimentation
EPI2917764	PB2	Finland	2023-Oct-17	EPI_ISL_18771245	A/white mink/Finland/UH-361-E1/2023	University of Helsinki, Department of Virology	Finnish Institute for Health and Welfare, THL	Altan, E; Avelin, V; Lindh, E; Savolainen-Kopra, C; Sironen, T; √ñsterlund, P.
EPI2917756	PB2	Finland	2023-Oct-17	EPI_ISL_18771244	A/white mink/Finland/UH-357-E1/2023	University of Helsinki, Department of Virology	Finnish Institute for Health and Welfare, THL	Altan, E; Avelin, V; Lindh, E; Savolainen-Kopra, C; Sironen, T; √ñsterlund, P.
EPI2917726	PB2	Finland	2023-Oct-17	EPI_ISL_18771178	A/white mink/Finland/UH-353-E1/2023	University of Helsinki, Department of Virology	Finnish Institute for Health and Welfare, THL	Altan, E; Avelin, V; Lindh, E; Savolainen-Kopra, C; Sironen, T; √ñsterlund, P.
EPI2907887	PB2	Finland	2023-Sep-20	EPI_ISL_18755130	A/mink/Finland/3082/2023	Finnish Food Authority	Finnish Food Authority	Kauppinen, Ari; Kareinen, Lauri; Tammiranta, Niina; Kantala, Tuija; Fusaro, Alice; Gadd, Tuija
EPI2907878	PB2	Finland	2023-Sep-20	EPI_ISL_18755129	A/mink/Finland/3080/2023	Finnish Food Authority	Finnish Food Authority	Kauppinen, Ari; Kareinen, Lauri; Tammiranta, Niina; Kantala, Tuija; Fusaro, Alice; Gadd, Tuija
EPI2755656	PB2	Finland	2023-Aug-07	EPI_ISL_18290480	A/mink/Finland/735/2023	Finnish Food Authority	Finnish Food Authority	Kauppinen, Ari; Kareinen, Lauri; Tammiranta, Niina; Kantala, Tuija; Fusaro, Alice; Gadd, Tuija
EPI2755648	PB2	Finland	2023-Aug-07	EPI_ISL_18290479	A/mink/Finland/731/2023	Finnish Food Authority	Finnish Food Authority	Kauppinen, Ari; Kareinen, Lauri; Tammiranta, Niina; Kantala, Tuija; Fusaro, Alice; Gadd, Tuija
EPI2755564	PB2	Finland	2023-Jul-03	EPI_ISL_18290468	A/mink/Finland/1003/2023	Finnish Food Authority	Finnish Food Authority	Kauppinen, Ari; Kareinen, Lauri; Tammiranta, Niina; Kantala, Tuija; Fusaro, Alice; Gadd, Tuija
EPI2755770	PB2	Finland	2023-Jul-03	EPI_ISL_18290467	A/mink/Finland/1002/2023	Finnish Food Authority	Finnish Food Authority	Kauppinen, Ari; Kareinen, Lauri; Tammiranta, Niina; Kantala, Tuija; Fusaro, Alice; Gadd, Tuija
EPI2641540	PB2	Finland	2023-Jul-03	EPI_ISL_18011231	A/mink/Finland/1002_23VIR6803-8/2023	Finnish Food Authority	Istituto Zooprofilattico Sperimentale Delle Venezie	Kantala, T.;Kauppinen, A.;Kareinen, L.;Gadd, T.;Galiano, M.;Ikonen, N.;Lindh, E.;Ormelli, S.;Varotto, M.;Zecchin, B.;Pastori, A.;Fusaro, A.;Zamperin, G.;Monne, I.;Terregino, C
EPI2536828	PB2	Netherlands	2022-Jan-16	EPI_ISL_17583227	A/Stone Marten/Netherlands/EMC1/2022	Erasmus Medical Center	Erasmus Medical Center	Vuong,O;Thewessen, S;Bellido-Martin,A.B; Chestakova, I; Sikkema, R;Fouchier, R.A.M.
EPI1965226	PB2	Netherlands	2022-Jan-17	EPI_ISL_9111104	A/otter/Netherlands/22001014-005/2022	Wageningen Bioveterinary Research	Wageningen Bioveterinary Research	Beerens, Nancy; Harders, Frank; Pritz-Verschuren, Sylvia; Roose, Marit; Venema, Sandra; Germeraad, Evelien; Engelsma, Marc; Heutink, Rene
EPI3261183	PB2	United States	2024-Mar-20	EPI_ISL_19094660	A/domestic cat/Oklahoma/24_009118-002/2024	United States Department of Agriculture, Agricultural Research Service, National Animal Disease Center	United States Department of Agriculture, Agricultural Research Service, National Animal Disease Center	Nguyen,T., Hutter,C., Markin,A., Thomas,M., Lantz,K., Killian,M.L., Janzen,G.M., Vijendran,S., Wagle,S., Inderski,B., Magstadt,D.R., Li,G., Diel,D.G., Frye,E.A., Dimitrov,K.M., Swinford,A.K., Thompson,A.C., Snevik,K.R., Suarez,D.L., Spackman,E., Lakin,S.M., C,S., Johnson,K.R., Baker,A.L., Robbe-Austerman,S., Torchetti,M.K.; Anderson,T.K.
EPI3255565	PB2	United States	2024-Mar-20	EPI_ISL_19088568	A/feline/Texas/24-029329-02/2024	Iowa State University, Veterinary Microbiology and Preventive Medicine Faculty	Iowa State University, Veterinary Microbiology and Preventive Medicine Faculty	Burrough,E.R., Magstadt,D.R., Petersen,B., Timmermans,S.J., Gauger,P.C., Zhang,J., Siepker,C., Mainenti,M., Li,G., Thompson,A.C., Gorden,P.J., Plummer,P.J.; Main,R.
EPI3255574	PB2	United States	2024-Mar-20	EPI_ISL_19088567	A/feline/Texas/24-029329-01/2024	Iowa State University, Veterinary Microbiology and Preventive Medicine Faculty	Iowa State University, Veterinary Microbiology and Preventive Medicine Faculty	Burrough,E.R., Magstadt,D.R., Petersen,B., Timmermans,S.J., Gauger,P.C., Zhang,J., Siepker,C., Mainenti,M., Li,G., Thompson,A.C., Gorden,P.J., Plummer,P.J.; Main,R.
EPI3208232	PB2	United States	2023-Jan-01	EPI_ISL_19054399	A/feline/USA/23-037332-001/2023	National Veterinary Services Laboratories - USDA	National Veterinary Services Laboratories - USDA	Aufderhar,Matthew;Franzen,Kerrie;Love,Emily;Killian,Mary;Lantz,Kristina;Stuber,Tod;Hicks,Jessica;Norris,Cameron
EPI3208224	PB2	United States	2024-Mar-16	EPI_ISL_19054398	A/feline/USA/24-009311-006/2024	National Veterinary Services Laboratories - USDA	National Veterinary Services Laboratories - USDA	Aufderhar,Matthew;Franzen,Kerrie;Love,Emily;Killian,Mary;Lantz,Kristina;Stuber,Tod;Hicks,Jessica;Norris,Cameron
EPI3208216	PB2	United States	2024-Mar-16	EPI_ISL_19054397	A/feline/Texas/24-009311-004/2024	National Veterinary Services Laboratories - USDA	National Veterinary Services Laboratories - USDA	Aufderhar,Matthew;Franzen,Kerrie;Love,Emily;Killian,Mary;Lantz,Kristina;Stuber,Tod;Hicks,Jessica;Norris,Cameron
EPI3208208	PB2	United States	2024-Mar-20	EPI_ISL_19054396	A/feline/New Mexico/24-009116-005/2024	National Veterinary Services Laboratories - USDA	National Veterinary Services Laboratories - USDA	Aufderhar,Matthew;Franzen,Kerrie;Love,Emily;Killian,Mary;Lantz,Kristina;Stuber,Tod;Hicks,Jessica;Norris,Cameron
EPI3208200	PB2	United States	2024-Mar-20	EPI_ISL_19054395	A/feline/New Mexico/24-009116-004/2024	National Veterinary Services Laboratories - USDA	National Veterinary Services Laboratories - USDA	Aufderhar,Matthew;Franzen,Kerrie;Love,Emily;Killian,Mary;Lantz,Kristina;Stuber,Tod;Hicks,Jessica;Norris,Cameron
EPI3208192	PB2	United States	2024-Mar-20	EPI_ISL_19054394	A/feline/New Mexico/24-009116-002/2024	National Veterinary Services Laboratories - USDA	National Veterinary Services Laboratories - USDA	Aufderhar,Matthew;Franzen,Kerrie;Love,Emily;Killian,Mary;Lantz,Kristina;Stuber,Tod;Hicks,Jessica;Norris,Cameron
EPI3208184	PB2	United States	2024-Mar-20	EPI_ISL_19054393	A/feline/Texas/24-008850-002/2024	National Veterinary Services Laboratories - USDA	National Veterinary Services Laboratories - USDA	Aufderhar,Matthew;Franzen,Kerrie;Love,Emily;Killian,Mary;Lantz,Kristina;Stuber,Tod;Hicks,Jessica;Norris,Cameron
EPI3208176	PB2	United States	2024-Mar-20	EPI_ISL_19054392	A/feline/Texas/24-008850-001/2024	National Veterinary Services Laboratories - USDA	National Veterinary Services Laboratories - USDA	Aufderhar,Matthew;Franzen,Kerrie;Love,Emily;Killian,Mary;Lantz,Kristina;Stuber,Tod;Hicks,Jessica;Norris,Cameron
EPI3208168	PB2	United States	2024-Mar-22	EPI_ISL_19054391	A/feline/Texas/24-008764-002/2024	National Veterinary Services Laboratories - USDA	National Veterinary Services Laboratories - USDA	Aufderhar,Matthew;Franzen,Kerrie;Love,Emily;Killian,Mary;Lantz,Kristina;Stuber,Tod;Hicks,Jessica;Norris,Cameron
EPI3208160	PB2	United States	2024-Mar-22	EPI_ISL_19054390	A/feline/Texas/24-008764-001/2024	National Veterinary Services Laboratories - USDA	National Veterinary Services Laboratories - USDA	Aufderhar,Matthew;Franzen,Kerrie;Love,Emily;Killian,Mary;Lantz,Kristina;Stuber,Tod;Hicks,Jessica;Norris,Cameron
EPI3261255	PB2	United States	2024-Mar-08	EPI_ISL_19094669	A/goat/Minnesota/24_007234-035/2024	United States Department of Agriculture, Agricultural Research Service, National Animal Disease Center	United States Department of Agriculture, Agricultural Research Service, National Animal Disease Center	Nguyen,T., Hutter,C., Markin,A., Thomas,M., Lantz,K., Killian,M.L., Janzen,G.M., Vijendran,S., Wagle,S., Inderski,B., Magstadt,D.R., Li,G., Diel,D.G., Frye,E.A., Dimitrov,K.M., Swinford,A.K., Thompson,A.C., Snevik,K.R., Suarez,D.L., Spackman,E., Lakin,S.M., C,S., Johnson,K.R., Baker,A.L., Robbe-Austerman,S., Torchetti,M.K.; Anderson,T.K.
EPI3261247	PB2	United States	2024-Mar-08	EPI_ISL_19094668	A/goat/Minnesota/24_007234-034/2024	United States Department of Agriculture, Agricultural Research Service, National Animal Disease Center	United States Department of Agriculture, Agricultural Research Service, National Animal Disease Center	Nguyen,T., Hutter,C., Markin,A., Thomas,M., Lantz,K., Killian,M.L., Janzen,G.M., Vijendran,S., Wagle,S., Inderski,B., Magstadt,D.R., Li,G., Diel,D.G., Frye,E.A., Dimitrov,K.M., Swinford,A.K., Thompson,A.C., Snevik,K.R., Suarez,D.L., Spackman,E., Lakin,S.M., C,S., Johnson,K.R., Baker,A.L., Robbe-Austerman,S., Torchetti,M.K.; Anderson,T.K.
EPI3261239	PB2	United States	2024-Mar-08	EPI_ISL_19094667	A/goat/Minnesota/24_007234-032/2024	United States Department of Agriculture, Agricultural Research Service, National Animal Disease Center	United States Department of Agriculture, Agricultural Research Service, National Animal Disease Center	Nguyen,T., Hutter,C., Markin,A., Thomas,M., Lantz,K., Killian,M.L., Janzen,G.M., Vijendran,S., Wagle,S., Inderski,B., Magstadt,D.R., Li,G., Diel,D.G., Frye,E.A., Dimitrov,K.M., Swinford,A.K., Thompson,A.C., Snevik,K.R., Suarez,D.L., Spackman,E., Lakin,S.M., C,S., Johnson,K.R., Baker,A.L., Robbe-Austerman,S., Torchetti,M.K.; Anderson,T.K.
EPI3261231	PB2	United States	2024-Mar-08	EPI_ISL_19094666	A/goat/Minnesota/24_007234-030/2024	United States Department of Agriculture, Agricultural Research Service, National Animal Disease Center	United States Department of Agriculture, Agricultural Research Service, National Animal Disease Center	Nguyen,T., Hutter,C., Markin,A., Thomas,M., Lantz,K., Killian,M.L., Janzen,G.M., Vijendran,S., Wagle,S., Inderski,B., Magstadt,D.R., Li,G., Diel,D.G., Frye,E.A., Dimitrov,K.M., Swinford,A.K., Thompson,A.C., Snevik,K.R., Suarez,D.L., Spackman,E., Lakin,S.M., C,S., Johnson,K.R., Baker,A.L., Robbe-Austerman,S., Torchetti,M.K.; Anderson,T.K.
EPI3261223	PB2	United States	2024-Mar-08	EPI_ISL_19094665	A/goat/Minnesota/24_007234-029/2024	United States Department of Agriculture, Agricultural Research Service, National Animal Disease Center	United States Department of Agriculture, Agricultural Research Service, National Animal Disease Center	Nguyen,T., Hutter,C., Markin,A., Thomas,M., Lantz,K., Killian,M.L., Janzen,G.M., Vijendran,S., Wagle,S., Inderski,B., Magstadt,D.R., Li,G., Diel,D.G., Frye,E.A., Dimitrov,K.M., Swinford,A.K., Thompson,A.C., Snevik,K.R., Suarez,D.L., Spackman,E., Lakin,S.M., C,S., Johnson,K.R., Baker,A.L., Robbe-Austerman,S., Torchetti,M.K.; Anderson,T.K.
EPI3261095	PB2	United States	2024-Mar-08	EPI_ISL_19094649	A/goat/Minnesota/24_007234-036/2024	United States Department of Agriculture, Agricultural Research Service, National Animal Disease Center	United States Department of Agriculture, Agricultural Research Service, National Animal Disease Center	Nguyen,T., Hutter,C., Markin,A., Thomas,M., Lantz,K., Killian,M.L., Janzen,G.M., Vijendran,S., Wagle,S., Inderski,B., Magstadt,D.R., Li,G., Diel,D.G., Frye,E.A., Dimitrov,K.M., Swinford,A.K., Thompson,A.C., Snevik,K.R., Suarez,D.L., Spackman,E., Lakin,S.M., C,S., Johnson,K.R., Baker,A.L., Robbe-Austerman,S., Torchetti,M.K.; Anderson,T.K.
EPI3261087	PB2	United States	2024-Mar-08	EPI_ISL_19094648	A/goat/Minnesota/24_007234-037/2024	United States Department of Agriculture, Agricultural Research Service, National Animal Disease Center	United States Department of Agriculture, Agricultural Research Service, National Animal Disease Center	Nguyen,T., Hutter,C., Markin,A., Thomas,M., Lantz,K., Killian,M.L., Janzen,G.M., Vijendran,S., Wagle,S., Inderski,B., Magstadt,D.R., Li,G., Diel,D.G., Frye,E.A., Dimitrov,K.M., Swinford,A.K., Thompson,A.C., Snevik,K.R., Suarez,D.L., Spackman,E., Lakin,S.M., C,S., Johnson,K.R., Baker,A.L., Robbe-Austerman,S., Torchetti,M.K.; Anderson,T.K.
EPI3261079	PB2	United States	2024-Mar-08	EPI_ISL_19094647	A/goat/Minnesota/24_007234-044/2024	United States Department of Agriculture, Agricultural Research Service, National Animal Disease Center	United States Department of Agriculture, Agricultural Research Service, National Animal Disease Center	Nguyen,T., Hutter,C., Markin,A., Thomas,M., Lantz,K., Killian,M.L., Janzen,G.M., Vijendran,S., Wagle,S., Inderski,B., Magstadt,D.R., Li,G., Diel,D.G., Frye,E.A., Dimitrov,K.M., Swinford,A.K., Thompson,A.C., Snevik,K.R., Suarez,D.L., Spackman,E., Lakin,S.M., C,S., Johnson,K.R., Baker,A.L., Robbe-Austerman,S., Torchetti,M.K.; Anderson,T.K.
EPI3261071	PB2	United States	2024-Mar-08	EPI_ISL_19094646	A/goat/Minnesota/24_007234-047/2024	United States Department of Agriculture, Agricultural Research Service, National Animal Disease Center	United States Department of Agriculture, Agricultural Research Service, National Animal Disease Center	Nguyen,T., Hutter,C., Markin,A., Thomas,M., Lantz,K., Killian,M.L., Janzen,G.M., Vijendran,S., Wagle,S., Inderski,B., Magstadt,D.R., Li,G., Diel,D.G., Frye,E.A., Dimitrov,K.M., Swinford,A.K., Thompson,A.C., Snevik,K.R., Suarez,D.L., Spackman,E., Lakin,S.M., C,S., Johnson,K.R., Baker,A.L., Robbe-Austerman,S., Torchetti,M.K.; Anderson,T.K.
EPI3260999	PB2	United States	2024-Feb-23	EPI_ISL_19094637	A/skunk/Washington/24_005959-006/2024	United States Department of Agriculture, Agricultural Research Service, National Animal Disease Center	United States Department of Agriculture, Agricultural Research Service, National Animal Disease Center	Nguyen,T., Hutter,C., Markin,A., Thomas,M., Lantz,K., Killian,M.L., Janzen,G.M., Vijendran,S., Wagle,S., Inderski,B., Magstadt,D.R., Li,G., Diel,D.G., Frye,E.A., Dimitrov,K.M., Swinford,A.K., Thompson,A.C., Snevik,K.R., Suarez,D.L., Spackman,E., Lakin,S.M., C,S., Johnson,K.R., Baker,A.L., Robbe-Austerman,S., Torchetti,M.K.; Anderson,T.K.
EPI3260991	PB2	United States	2024-Feb-23	EPI_ISL_19094636	A/skunk/Washington/24_005959-005/2024	United States Department of Agriculture, Agricultural Research Service, National Animal Disease Center	United States Department of Agriculture, Agricultural Research Service, National Animal Disease Center	Nguyen,T., Hutter,C., Markin,A., Thomas,M., Lantz,K., Killian,M.L., Janzen,G.M., Vijendran,S., Wagle,S., Inderski,B., Magstadt,D.R., Li,G., Diel,D.G., Frye,E.A., Dimitrov,K.M., Swinford,A.K., Thompson,A.C., Snevik,K.R., Suarez,D.L., Spackman,E., Lakin,S.M., C,S., Johnson,K.R., Baker,A.L., Robbe-Austerman,S., Torchetti,M.K.; Anderson,T.K.
EPI3260983	PB2	United States	2024-Feb-23	EPI_ISL_19094635	A/skunk/Washington/24_005959-004/2024	United States Department of Agriculture, Agricultural Research Service, National Animal Disease Center	United States Department of Agriculture, Agricultural Research Service, National Animal Disease Center	Nguyen,T., Hutter,C., Markin,A., Thomas,M., Lantz,K., Killian,M.L., Janzen,G.M., Vijendran,S., Wagle,S., Inderski,B., Magstadt,D.R., Li,G., Diel,D.G., Frye,E.A., Dimitrov,K.M., Swinford,A.K., Thompson,A.C., Snevik,K.R., Suarez,D.L., Spackman,E., Lakin,S.M., C,S., Johnson,K.R., Baker,A.L., Robbe-Austerman,S., Torchetti,M.K.; Anderson,T.K.
EPI3260975	PB2	United States	2024-Mar-23	EPI_ISL_19094634	A/raccoon/New Mexico/24_009496-002/2024	United States Department of Agriculture, Agricultural Research Service, National Animal Disease Center	United States Department of Agriculture, Agricultural Research Service, National Animal Disease Center	Nguyen,T., Hutter,C., Markin,A., Thomas,M., Lantz,K., Killian,M.L., Janzen,G.M., Vijendran,S., Wagle,S., Inderski,B., Magstadt,D.R., Li,G., Diel,D.G., Frye,E.A., Dimitrov,K.M., Swinford,A.K., Thompson,A.C., Snevik,K.R., Suarez,D.L., Spackman,E., Lakin,S.M., C,S., Johnson,K.R., Baker,A.L., Robbe-Austerman,S., Torchetti,M.K.; Anderson,T.K.
[truncated: 43 more rows]
