# Supplementary material for: Decoding non-human mammalian adaptive signatures of 2.3.4.4b H5N1 to assess its human adaptive potential
Source: Research Square preprint supplement (doi:10.21203/rs.3.rs-5157982/v1), 2024-10-04
Supplement: Supplementary file 2 [file 810471e79589ffc6a3a8ce67.xlsx]

## Sheet: Sheet1
We gratefully acknowledge the authors, originating and submitting laboratories of the sequences from GISAID’s EpiFlu™ Database on which this research is based. The list is detailed below.
All submitters of data may be contacted directly via www.gisaid.org
Segment ID	Segment	Country	Collection date	Isolate-ID	Isolate name	Originating Lab	Submitting Lab	Authors
EPI3217374	HA	Netherlands	2021-Dec-03	EPI_ISL_19057417	A/red fox/Netherlands/21040099-006_PB2K/2021	Wageningen Bioveterinary Research	Wageningen Bioveterinary Research	Beerens, Nancy; Harders, Frank; Pritz-Verschuren, Sylvia; Roose, Marit; Venema, Sandra; Germeraad, Evelien; Engelsma, Marc; Heutink, Rene
EPI3217366	HA	Netherlands	2021-Dec-03	EPI_ISL_19057416	A/red fox/Netherlands/21040099-006_PB2E/2021	Wageningen Bioveterinary Research	Wageningen Bioveterinary Research	Beerens, Nancy; Harders, Frank; Pritz-Verschuren, Sylvia; Roose, Marit; Venema, Sandra; Germeraad, Evelien; Engelsma, Marc; Heutink, Rene
EPI2837096	HA	Finland	2023-Aug-07	EPI_ISL_18618528	A/arctic-fox/Finland/752/2023	Finnish Food Authority	Finnish Food Authority	Kauppinen, Ari; Kareinen, Lauri; Tammiranta, Niina; Kantala, Tuija; Fusaro, Alice; Gadd, Tuija
EPI2760286	HA	Finland	2023-Jul-10	EPI_ISL_18321745	A/arctic-fox/Finland/HVVI_503_23_23VIR6803-6/2023	Finnish Food Authority	Istituto Zooprofilattico Sperimentale Delle Venezie	Gadd, T.; Tammiranta, N; Kantala, K.; Nokireki, T.; Pastori, A.; Zecchin, B.; Fusaro, A.; Schivo, A.; Salviato, A.; Palumbo, E.; Giussani, E.; Monne, I.; Terregino, C.
EPI2760278	HA	Finland	2023-Jul-06	EPI_ISL_18321744	A/arctic-fox/Finland/HVVI_491_23_23VIR6803-1/2023	Finnish Food Authority	Istituto Zooprofilattico Sperimentale Delle Venezie	Gadd, T.; Tammiranta, N; Kantala, K.; Nokireki, T.; Pastori, A.; Zecchin, B.; Fusaro, A.; Schivo, A.; Salviato, A.; Palumbo, E.; Giussani, E.; Monne, I.; Terregino, C.
EPI2760270	HA	Finland	2023-Jul-06	EPI_ISL_18321743	A/arctic-fox/Finland/HVVI_492_23_23VIR6803-2/2023	Finnish Food Authority	Istituto Zooprofilattico Sperimentale Delle Venezie	Gadd, T.; Tammiranta, N; Kantala, K.; Nokireki, T.; Pastori, A.; Zecchin, B.; Fusaro, A.; Schivo, A.; Salviato, A.; Palumbo, E.; Giussani, E.; Monne, I.; Terregino, C.
EPI2755502	HA	Finland	2023-Aug-04	EPI_ISL_18292963	A/arctic-fox/Finland/684/2023	Finnish Food Authority	Finnish Food Authority	Kauppinen, Ari; Kareinen, Lauri; Tammiranta, Niina; Kantala, Tuija; Fusaro, Alice; Giussani, Edoardo; Gadd, Tuija
EPI2755462	HA	Finland	2023-Aug-01	EPI_ISL_18292958	A/arctic-fox/Finland/675/2023	Finnish Food Authority	Finnish Food Authority	Kauppinen, Ari; Kareinen, Lauri; Tammiranta, Niina; Kantala, Tuija; Fusaro, Alice; Giussani, Edoardo; Gadd, Tuija
EPI2755438	HA	Finland	2023-Jul-31	EPI_ISL_18292955	A/arctic-fox/Finland/670/2023	Finnish Food Authority	Finnish Food Authority	Kauppinen, Ari; Kareinen, Lauri; Tammiranta, Niina; Kantala, Tuija; Fusaro, Alice; Galiano, Monica; Ikonen, Niina; Lindh, Erika; Gadd, Tuija
EPI2755430	HA	Finland	2023-Jul-31	EPI_ISL_18292954	A/arctic-fox/Finland/666/2023	Finnish Food Authority	Finnish Food Authority	Kauppinen, Ari; Kareinen, Lauri; Tammiranta, Niina; Kantala, Tuija; Fusaro, Alice; Galiano, Monica; Ikonen, Niina; Lindh, Erika; Gadd, Tuija
EPI2701783	HA	Finland	2023-Aug-04	EPI_ISL_18131280	A/blue fox/Finland/2023AI06876_071/2023	University of Helsinki, Department of Virology	Friedrich-Loeffler-Institut
EPI2701775	HA	Finland	2023-Aug-04	EPI_ISL_18131279	A/silver fox/Finland/2023AI06834_029/2023	University of Helsinki, Department of Virology	Friedrich-Loeffler-Institut
EPI2701767	HA	Finland	2023-Aug-03	EPI_ISL_18131278	A/silver fox/Finland/2023AI06838_033/2023	University of Helsinki, Department of Virology	Friedrich-Loeffler-Institut
EPI2701759	HA	Finland	2023-Aug-03	EPI_ISL_18131277	A/red fox/Finland/2023AI06879_074/2023	University of Helsinki, Department of Virology	Friedrich-Loeffler-Institut
EPI2701751	HA	Finland	2023-Aug-03	EPI_ISL_18131276	A/blue fox/Finland/2023AI06820_015/2023	University of Helsinki, Department of Virology	Friedrich-Loeffler-Institut
EPI2235560	HA	Canada	2022-May-09	EPI_ISL_16003265	A/Red Fox/MB/FAV-414-004/2022	Manitoba Agriculture	Canadian Food Inspection Agency	Alkie, Tamiru; Cox, Sherri; Pople, Neil; Xu, Wanhong; Hisanaga, Tamiko; Suderman, Suderman; Koziuk, Janice; Kruczkiewicz, Peter; Nguyen, Hoang Hai; Fisher, Mathew; Lung, Oliver; Berhane, Yohannes
EPI2197240	HA	Finland	2021-Nov-01	EPI_ISL_15518271	A/red_fox/Finland/2891_21RS3535-1/2021	Finnish Food Authority	Istituto Zooprofilattico Sperimentale Delle Venezie	Tammiranta, N.;Kantala, T.;Laamanen, I.;Gadd, T.;Zecchin, B.;Fusaro, A.;Schivo, A.;Salviato, A.;Palumbo, E.;Milani, A.;Giussani, E.;Pastori, A.;Monne, I.;Terregino, C.
EPI2197216	HA	Finland	2021-Sep-01	EPI_ISL_15518268	A/fox/Finland/2844_21VIR9619-1/2021	Finnish Food Authority	Istituto Zooprofilattico Sperimentale Delle Venezie	Tammiranta, N.;Kantala, T.;Laamanen, I.;Gadd, T.;Zecchin, B.;Fusaro, A.;Schivo, A.;Salviato, A.;Palumbo, E.;Giussani, E.;Pastori, A.;Monne, I.;Terregino, C.
EPI2131357	HA	United States	2022-Apr-25	EPI_ISL_14551957	A/Vulpes vulpes/New_York/088592/2022	Cornell University	Cornell University	Diel, Diego G; Caserta, Leonardo Cardia; Cronk, Brittany D.
EPI2018083	HA	Netherlands	2022-Jan-22	EPI_ISL_12069289	A/Fox/Netherlands/EMC3/2022	Erasmus Medical Center	Erasmus Medical Center	R.A.M., Fouchier; S., Thewessen; O., Vuong; I., Chestakova; R., Sikkema; P., Lexmond; M., Pronk
EPI2018075	HA	Netherlands	2022-Jan-10	EPI_ISL_12069288	A/Fox/Netherlands/EMC2/2022	Erasmus Medical Center	Erasmus Medical Center	R.A.M., Fouchier; S., Thewessen; O., Vuong; I., Chestakova; R., Sikkema; P., Lexmond; M., Pronk
EPI1994446	HA	Netherlands	2022-Mar-01	EPI_ISL_10915976	A/red fox/Netherlands/22004172-003/2022	Wageningen Bioveterinary Research	Wageningen Bioveterinary Research	Beerens, Nancy; Harders, Frank; Pritz-Verschuren, Sylvia; Roose, Marit; Venema, Sandra; Germeraad, Evelien; Engelsma, Marc; Heutink, Rene
EPI1987226	HA	Netherlands	2022-Feb-08	EPI_ISL_10220428	A/red fox/Netherlands/22002722-004/2022	Wageningen Bioveterinary Research	Wageningen Bioveterinary Research	Beerens, Nancy; Harders, Frank; Pritz-Verschuren, Sylvia; Roose, Marit; Venema, Sandra; Germeraad, Evelien; Engelsma, Marc; Heutink, Rene
EPI1987218	HA	Netherlands	2022-Feb-07	EPI_ISL_10220427	A/red fox/Netherlands/22002636-005/2022	Wageningen Bioveterinary Research	Wageningen Bioveterinary Research	Beerens, Nancy; Harders, Frank; Pritz-Verschuren, Sylvia; Roose, Marit; Venema, Sandra; Germeraad, Evelien; Engelsma, Marc; Heutink, Rene
EPI1981020	HA	Netherlands	2022-Jan-31	EPI_ISL_9616272	A/red fox/Netherlands/22002191-003/2022	Wageningen Bioveterinary Research	Wageningen Bioveterinary Research	Beerens, Nancy; Harders, Frank; Pritz-Verschuren, Sylvia; Roose, Marit; Venema, Sandra; Germeraad, Evelien; Engelsma, Marc; Heutink, Rene
EPI1981012	HA	Netherlands	2022-Jan-31	EPI_ISL_9616271	A/red fox/Netherlands/22002190-003/2022	Wageningen Bioveterinary Research	Wageningen Bioveterinary Research	Beerens, Nancy; Harders, Frank; Pritz-Verschuren, Sylvia; Roose, Marit; Venema, Sandra; Germeraad, Evelien; Engelsma, Marc; Heutink, Rene
EPI1980996	HA	Netherlands	2022-Jan-27	EPI_ISL_9616265	A/red fox/Netherlands/22001901-005/2022	Wageningen Bioveterinary Research	Wageningen Bioveterinary Research	Beerens, Nancy; Harders, Frank; Pritz-Verschuren, Sylvia; Roose, Marit; Venema, Sandra; Germeraad, Evelien; Engelsma, Marc; Heutink, Rene
EPI1956640	HA	Netherlands	2022-Jan-03	EPI_ISL_8650947	A/red fox/Netherlands/22000097-004/2022	Wageningen Bioveterinary Research	Wageningen Bioveterinary Research	Beerens, Nancy; Harders, Frank; Pritz-Verschuren, Sylvia; Roose, Marit; Venema, Sandra; Germeraad, Evelien; Engelsma, Marc; Heutink, Rene
EPI1859953	HA	Netherlands	2021-May-17	EPI_ISL_2194219	A/red fox/Netherlands/21028774-004/2021	Wageningen Bioveterinary Research	Wageningen Bioveterinary Research	Beerens, Nancy; Harders, Frank; Pritz-Verschuren, Sylvia; Roose, Marit; Germeraad, Evelien; Engelsma, Marc; Bossers, Alex; Heutink, Rene
EPI2697618	HA	Finland	2023-Jul-31	EPI_ISL_18123725	A/arctic-fox/Finland/660/2023	Finnish Food Authority	Finnish Institute for Health and Welfare, THL	Tuija Kantala, Alice Fusaro, Tuija Gadd, Monica Gallo, Niina Ikonen, Lauri Kareinen, Ari Kauppinen, Niina Tammiranta, Erika Lindh
EPI2697610	HA	Finland	2023-Jul-27	EPI_ISL_18123724	A/arctic-fox/Finland/654/2023	Finnish Food Authority	Finnish Institute for Health and Welfare, THL	Tuija Kantala, Alice Fusaro, Tuija Gadd, Monica Gallo, Niina Ikonen, Lauri Kareinen, Ari Kauppinen, Niina Tammiranta, Erika Lindh
EPI2697595	HA	Finland	2023-Jul-17	EPI_ISL_18123722	A/arctic-fox/Finland/564/2023	Finnish Food Authority	Finnish Institute for Health and Welfare, THL	Tuija Kantala, Alice Fusaro, Tuija Gadd, Monica Gallo, Niina Ikonen, Lauri Kareinen, Ari Kauppinen, Niina Tammiranta, Erika Lindh
EPI2468404	HA	Belgium	2023-Mar-02	EPI_ISL_17245141	A/Vulpes_vulpes/Belgium/01924_0003/2023	Sciensano - Animal Infectious Diseases	Sciensano, Department of Animal Infectious Diseases	Van Borm, Steven; Roupie, Virginie; Hostyn, Pierre; Mathijs, Elisabeth; Lambrecht, Benedicte; Steensels, Mieke
EPI2468396	HA	Belgium	2023-Feb-27	EPI_ISL_17245099	A/Vulpes_vulpes/Belgium/01784_0010/2023	Sciensano - Animal Infectious Diseases	Sciensano, Department of Animal Infectious Diseases	Van Borm, Steven; Roupie, Virginie; Hostyn, Pierre; Mathijs, Elisabeth; Lambrecht, Benedicte; Steensels, Mieke
EPI2468388	HA	Belgium	2023-Feb-27	EPI_ISL_17245098	A/Vulpes_vulpes/Belgium/01784_0008/2023	Sciensano - Animal Infectious Diseases	Sciensano, Department of Animal Infectious Diseases	Van Borm, Steven; Roupie, Virginie; Hostyn, Pierre; Mathijs, Elisabeth; Lambrecht, Benedicte; Steensels, Mieke
EPI2468380	HA	Belgium	2023-Feb-27	EPI_ISL_17244973	A/Vulpes_vulpes/Belgium/01784_0004/2023	Sciensano - Animal Infectious Diseases	Sciensano, Department of Animal Infectious Diseases	Van Borm, Steven; Roupie, Virginie; Hostyn, Pierre; Mathijs, Elisabeth; Lambrecht, Benedicte; Steensels, Mieke
EPI2856923	HA	Canada	2023-Aug-22	EPI_ISL_18665627	A/Red_Fox/BC/AIVPHL-1286/2023	B.C. Centre for Disease Control	Public Health Agency of Canada	Himsworth, Chelsea; Prystajecky,Natalie; Tyson,John; Jassem,Agatha; Kuchinski,Kevin; Coombe, Michelle; Lee,Tracy; Azana,Rob; Fung,Janet; Chan,Michael; Cheung,Branco; Caleta,Jessica; Tsang,Frankie; Yang,Kevin; Russell,Shannon; Zlosnik,James; Hoang,Linda
EPI2782179	HA	Norway	2022-Jul-26	EPI_ISL_18455203	A/Red_fox/Norway/2022-07-1768-2T/2022	Norwegian Veterinary Institute	Norwegian Veterinary Institute	Britt Gjerset, Cathrine Arnason B√∏e
EPI2677004	HA	United States	2022-May-27	EPI_ISL_18090482	A/red fox/Michigan/22-018712-003/2022	National Veterinary Services Laboratories - USDA	National Veterinary Services Laboratories - USDA	Chinh,Thanh;Franzen,Kerrie;Love,Emily;Ozella,Mikaela;Killian,Mary;Lantz,Kristina;Stuber,Tod;Hicks,Jessica;Norris,Cameron
EPI2540332	HA	Belgium	2023-Mar-29	EPI_ISL_17606758	A/Vulpes_vulpes/Belgium/03117_0004/2023	Sciensano - Animal Infectious Diseases	Sciensano, Department of Animal Infectious Diseases	Van Borm, Steven; Roupie, Virginie; Hostyn, Pierre; Mathijs, Elisabeth; Lambrecht, Benedicte; Steensels, Mieke
EPI2540323	HA	Belgium	2023-Mar-29	EPI_ISL_17606757	A/Vulpes_vulpes/Belgium/03117_0001/2023	Sciensano - Animal Infectious Diseases	Sciensano, Department of Animal Infectious Diseases	Van Borm, Steven; Roupie, Virginie; Hostyn, Pierre; Mathijs, Elisabeth; Lambrecht, Benedicte; Steensels, Mieke
EPI2540314	HA	Belgium	2023-Mar-14	EPI_ISL_17606756	A/Vulpes_vulpes/Belgium/02359_0006/2023	Sciensano - Animal Infectious Diseases	Sciensano, Department of Animal Infectious Diseases	Van Borm, Steven; Roupie, Virginie; Hostyn, Pierre; Mathijs, Elisabeth; Lambrecht, Benedicte; Steensels, Mieke
EPI2540306	HA	Belgium	2023-Mar-14	EPI_ISL_17606755	A/Vulpes_vulpes/Belgium/02359_0002/2023	Sciensano - Animal Infectious Diseases	Sciensano, Department of Animal Infectious Diseases	Van Borm, Steven; Roupie, Virginie; Hostyn, Pierre; Mathijs, Elisabeth; Lambrecht, Benedicte; Steensels, Mieke
EPI2513407	HA	Canada	2023-Jan-31	EPI_ISL_17494318	A/Red Fox/NL/FAV-0075/2023	Atlantic Veterinary College, University of Prince Edward Island	Canadian Food Inspection Agency	Parma, L; Hisanaga, T; Xu, W; Alkie, T; Jones, M; Yason, C; Lung, O; Berhane, Y
EPI2576157	HA	Denmark	2022-Apr-28	EPI_ISL_17447440	A/red fox/Denmark/08658-3.02-2/2022	Statens Serumm Institute	Statens Serum Institute	Hjulsager,Charlotte;Liang,Yuan
EPI2576149	HA	Denmark	2022-Apr-28	EPI_ISL_17447414	A/red fox/Denmark/08658-2.02-2/2022	Statens Serum Institute	Statens Serum Institute	Hjulsager,Charlotte; Liang,Yuan
EPI2576141	HA	Denmark	2022-Apr-28	EPI_ISL_17447413	A/red fox/Denmark/08658-1.01/2022	Statens Serumm Institute	Statens Serum Institute	Hjulsager,Charlotte; Liang,Yuan
EPI2500049	HA	Canada	2022-May-19	EPI_ISL_17394088	A/Red Fox/PEI/FAV-0544-P1/2022	Atlantic Veterinary College, University of Prince Edward Island	Canadian Food Inspection Agency	Alkie, T; Yason, C; Jones, M; Xu, W; Hisanaga, T; Koziuk, T; Fisher, M; Lung, O; Berhane, Y
EPI2473768	HA	United States	2022-Jul-06	EPI_ISL_17260687	A/red fox/Michigan/22-021733-007/2022	National Veterinary Services Laboratories - USDA	National Veterinary Services Laboratories - USDA	Chinh,Thanh;Franzen,Kerrie;Love,Emily;Killian,Mary;Koster,Leo;Lantz,Kristina;Stuber,Tod;Hicks,Jessica;Norris,Cameron
EPI2473760	HA	United States	2022-Jul-06	EPI_ISL_17260686	A/red fox/Michigan/22-021733-005/2022	National Veterinary Services Laboratories - USDA	National Veterinary Services Laboratories - USDA	Chinh,Thanh;Franzen,Kerrie;Love,Emily;Killian,Mary;Koster,Leo;Lantz,Kristina;Stuber,Tod;Hicks,Jessica;Norris,Cameron
EPI2473743	HA	United States	2022-Jul-06	EPI_ISL_17260685	A/red fox/Michigan/22-021733-003/2022	National Veterinary Services Laboratories - USDA	National Veterinary Services Laboratories - USDA	Chinh,Thanh;Franzen,Kerrie;Love,Emily;Killian,Mary;Koster,Leo;Lantz,Kristina;Stuber,Tod;Hicks,Jessica;Norris,Cameron
EPI2473724	HA	United States	2022-Jul-06	EPI_ISL_17260684	A/red fox/Michigan/22-021733-002/2022	National Veterinary Services Laboratories - USDA	National Veterinary Services Laboratories - USDA	Chinh,Thanh;Franzen,Kerrie;Love,Emily;Killian,Mary;Koster,Leo;Lantz,Kristina;Stuber,Tod;Hicks,Jessica;Norris,Cameron
EPI2473676	HA	United States	2022-Jun-15	EPI_ISL_17260681	A/red fox/Alaska/22-019272-001/2022	National Veterinary Services Laboratories - USDA	National Veterinary Services Laboratories - USDA	Chinh,Thanh;Franzen,Kerrie;Love,Emily;Killian,Mary;Koster,Leo;Lantz,Kristina;Stuber,Tod;Hicks,Jessica;Norris,Cameron
EPI2473648	HA	United States	2022-May-27	EPI_ISL_17260679	A/red fox/Michigan/22-018712-005/2022	National Veterinary Services Laboratories - USDA	National Veterinary Services Laboratories - USDA	Chinh,Thanh;Franzen,Kerrie;Love,Emily;Killian,Mary;Koster,Leo;Lantz,Kristina;Stuber,Tod;Hicks,Jessica;Norris,Cameron
EPI2473634	HA	United States	2022-May-10	EPI_ISL_17260678	A/red fox/Michigan/22-017507-008/2022	National Veterinary Services Laboratories - USDA	National Veterinary Services Laboratories - USDA	Chinh,Thanh;Franzen,Kerrie;Love,Emily;Killian,Mary;Koster,Leo;Lantz,Kristina;Stuber,Tod;Hicks,Jessica;Norris,Cameron
EPI2473620	HA	United States	2022-May-05	EPI_ISL_17260677	A/red fox/Michigan/22-017507-007/2022	National Veterinary Services Laboratories - USDA	National Veterinary Services Laboratories - USDA	Chinh,Thanh;Franzen,Kerrie;Love,Emily;Killian,Mary;Koster,Leo;Lantz,Kristina;Stuber,Tod;Hicks,Jessica;Norris,Cameron
EPI2473606	HA	United States	2022-May-18	EPI_ISL_17260676	A/red fox/Michigan/22-017507-006/2022	National Veterinary Services Laboratories - USDA	National Veterinary Services Laboratories - USDA	Chinh,Thanh;Franzen,Kerrie;Love,Emily;Killian,Mary;Koster,Leo;Lantz,Kristina;Stuber,Tod;Hicks,Jessica;Norris,Cameron
EPI2473578	HA	United States	2022-May-23	EPI_ISL_17260674	A/red fox/North Dakota/22-017061-002/2022	National Veterinary Services Laboratories - USDA	National Veterinary Services Laboratories - USDA	Chinh,Thanh;Franzen,Kerrie;Love,Emily;Killian,Mary;Koster,Leo;Lantz,Kristina;Stuber,Tod;Hicks,Jessica;Norris,Cameron
EPI2473564	HA	United States	2022-May-23	EPI_ISL_17260673	A/red fox/North Dakota/22-017061-001/2022	National Veterinary Services Laboratories - USDA	National Veterinary Services Laboratories - USDA	Chinh,Thanh;Franzen,Kerrie;Love,Emily;Killian,Mary;Koster,Leo;Lantz,Kristina;Stuber,Tod;Hicks,Jessica;Norris,Cameron
EPI2473550	HA	United States	2022-Jan-01	EPI_ISL_17260672	A/red fox/Minnesota/22-017056-001/2022	National Veterinary Services Laboratories - USDA	National Veterinary Services Laboratories - USDA	Chinh,Thanh;Franzen,Kerrie;Love,Emily;Killian,Mary;Koster,Leo;Lantz,Kristina;Stuber,Tod;Hicks,Jessica;Norris,Cameron
EPI2473522	HA	United States	2022-May-24	EPI_ISL_17260670	A/fox/Utah/22-016402-001/2022	National Veterinary Services Laboratories - USDA	National Veterinary Services Laboratories - USDA	Chinh,Thanh;Franzen,Kerrie;Love,Emily;Killian,Mary;Koster,Leo;Lantz,Kristina;Stuber,Tod;Hicks,Jessica;Norris,Cameron
EPI2473508	HA	United States	2022-May-10	EPI_ISL_17260669	A/red fox/Alaska/22-016300-001/2022	National Veterinary Services Laboratories - USDA	National Veterinary Services Laboratories - USDA	Chinh,Thanh;Franzen,Kerrie;Love,Emily;Killian,Mary;Koster,Leo;Lantz,Kristina;Stuber,Tod;Hicks,Jessica;Norris,Cameron
EPI2473482	HA	United States	2022-May-06	EPI_ISL_17260667	A/fox/Wisconsin/22-014746-026/2022	National Veterinary Services Laboratories - USDA	National Veterinary Services Laboratories - USDA	Chinh,Thanh;Franzen,Kerrie;Love,Emily;Killian,Mary;Koster,Leo;Lantz,Kristina;Stuber,Tod;Hicks,Jessica;Norris,Cameron
EPI2473469	HA	United States	2022-May-06	EPI_ISL_17260666	A/fox/Wisconsin/22-014746-021/2022	National Veterinary Services Laboratories - USDA	National Veterinary Services Laboratories - USDA	Chinh,Thanh;Franzen,Kerrie;Love,Emily;Killian,Mary;Koster,Leo;Lantz,Kristina;Stuber,Tod;Hicks,Jessica;Norris,Cameron
EPI2473455	HA	United States	2022-May-03	EPI_ISL_17260665	A/fox/Wisconsin/22-014746-015/2022	National Veterinary Services Laboratories - USDA	National Veterinary Services Laboratories - USDA	Chinh,Thanh;Franzen,Kerrie;Love,Emily;Killian,Mary;Koster,Leo;Lantz,Kristina;Stuber,Tod;Hicks,Jessica;Norris,Cameron
EPI2473442	HA	United States	2022-Apr-19	EPI_ISL_17260664	A/fox/Wisconsin/22-014746-007/2022	National Veterinary Services Laboratories - USDA	National Veterinary Services Laboratories - USDA	Chinh,Thanh;Franzen,Kerrie;Love,Emily;Killian,Mary;Koster,Leo;Lantz,Kristina;Stuber,Tod;Hicks,Jessica;Norris,Cameron
EPI2473415	HA	United States	2022-May-01	EPI_ISL_17260662	A/fox/Wisconsin/22-013774-013/2022	National Veterinary Services Laboratories - USDA	National Veterinary Services Laboratories - USDA	Chinh,Thanh;Franzen,Kerrie;Love,Emily;Killian,Mary;Koster,Leo;Lantz,Kristina;Stuber,Tod;Hicks,Jessica;Norris,Cameron
EPI2473401	HA	United States	2022-May-01	EPI_ISL_17260661	A/fox/Wisconsin/22-013774-008/2022	National Veterinary Services Laboratories - USDA	National Veterinary Services Laboratories - USDA	Chinh,Thanh;Franzen,Kerrie;Love,Emily;Killian,Mary;Koster,Leo;Lantz,Kristina;Stuber,Tod;Hicks,Jessica;Norris,Cameron
EPI2437468	HA	United Kingdom	2022-Aug-23	EPI_ISL_17072388	A/fox/England/015850/2022	Animal and Plant Health Agency (APHA)	Animal and Plant Health Agency (APHA)
EPI2398419	HA	United Kingdom	2023-Jan-12	EPI_ISL_16904555	A/Red_Fox/Wales/017836/2023	Animal and Plant Health Agency (APHA)	Animal and Plant Health Agency (APHA)
EPI2274958	HA	Canada	2022-May-05	EPI_ISL_16367899	A/Red Fox/SK/FAV-0824-96/2022	Western College of Veterinary Medicine, University of Saskatchewan	Canadian Food Inspection Agency
EPI2259127	HA	United States	2022-Apr-27	EPI_ISL_16243273	A/fox/New York/22-015065-001/2022	National Veterinary Services Laboratories - USDA	National Veterinary Services Laboratories - USDA	Chinh,Thanh;Love, Emily;Franzen,Kerrie;Killian,Mary;Koster,Leo;Lantz,Kristina;Stuber,Tod;Hicks,Jessica
EPI2259119	HA	United States	2022-Apr-27	EPI_ISL_16243264	A/fox/New York/22-015064-001/2022	National Veterinary Services Laboratories - USDA	National Veterinary Services Laboratories - USDA	Chinh,Thanh;Love, Emily;Franzen,Kerrie;Killian,Mary;Koster,Leo;Lantz,Kristina;Stuber,Tod;Hicks,Jessica
EPI2259111	HA	United States	2022-Apr-15	EPI_ISL_16243253	A/fox/New York/22-015063-001/2022	National Veterinary Services Laboratories - USDA	National Veterinary Services Laboratories - USDA	Chinh,Thanh;Love, Emily;Franzen,Kerrie;Killian,Mary;Koster,Leo;Lantz,Kristina;Stuber,Tod;Hicks,Jessica
EPI2236542	HA	Canada	2022-May-19	EPI_ISL_16022233	A/Red Fox/SK/FAV-0548-03/2022	Western College of Veterinary Medicine, University of Saskatchewan	Canadian Food Inspection Agency	Alkie, Tamiru; Maria B, Araya; Xu, Wanhong; Hisanaga, Tamiko; Suderman, Suderman; Koziuk, Janice; Kruczkiewicz, Peter; Nguyen, Hoang Hai; Fisher, Mathew; Lung, Oliver; Berhane, Yohannes
EPI2236533	HA	Canada	2022-Jun-28	EPI_ISL_16021854	A/Red Fox/NS/FAV-0879/2022	Atlantic Veterinary College, University of Prince Edward Island	Canadian Food Inspection Agency	Alkie, Tamiru; Yason, Carmencita; Jones, E.B. Megan; Bourque, Laura; Xu, Wanhong; Hisanaga, Tamiko; Suderman, Suderman; Koziuk, Janice; Kruczkiewicz, Peter; Nguyen, Hoang Hai; Fisher, Mathew; Lung, Oliver; Berhane, Yohannes
EPI2236517	HA	Canada	2022-May-19	EPI_ISL_16021788	A/Red Fox/NS/FAV-0543/2022	Atlantic Veterinary College, University of Prince Edward Island	Canadian Food Inspection Agency	Alkie, Tamiru; Yason, Carmencita; Jones, E.B. Megan; Bourque, Laura; Xu, Wanhong; Hisanaga, Tamiko; Suderman, Suderman; Koziuk, Janice; Kruczkiewicz, Peter; Nguyen, Hoang Hai; Fisher, Mathew; Lung, Oliver; Berhane, Yohannes
EPI2236509	HA	Canada	2022-May-24	EPI_ISL_16021587	A/Red Fox/PEI/FAV-0591-02/2022	Atlantic Veterinary College, University of Prince Edward Island	Canadian Food Inspection Agency	Alkie, Tamiru; Yason, Carmencita; Jones, E.B. Megan; Bourque, Laura; Xu, Wanhong; Hisanaga, Tamiko; Suderman, Suderman; Koziuk, Janice; Kruczkiewicz, Peter; Nguyen, Hoang Hai; Fisher, Mathew; Lung, Oliver; Berhane, Yohannes
EPI2236232	HA	Canada	2022-Apr-12	EPI_ISL_16014112	A/Red Fox/ON/FAV-0300-01/2022	Ontario Veterinary College, University of Guelph	Canadian Food Inspection Agency	Alkie, Tamiru; Cox, Sherri; Ojkic, Davor; Stevens, Brian; Xu, Wanhong; Hisanaga, Tamiko; Suderman, Suderman; Koziuk, Janice; Kruczkiewicz, Peter; Nguyen, Hoang Hai; Fisher, Mathew; Lung, Oliver; Berhane, Yohannes
EPI2236224	HA	Canada	2022-Apr-03	EPI_ISL_16013993	A/Red Fox/ON/FAV-0873/2022	Ontario Veterinary College, University of Guelph	Canadian Food Inspection Agency	Alkie, Tamiru; Cox, Sherri; Ojkic, Davor; Stevens, Brian; Xu, Wanhong; Hisanaga, Tamiko; Suderman, Suderman; Koziuk, Janice; Kruczkiewicz, Peter; Nguyen, Hoang Hai; Fisher, Mathew; Lung, Oliver; Berhane, Yohannes
EPI2236216	HA	Canada	2022-May-31	EPI_ISL_16013990	A/Red Fox/ON/FAV-0773-01/2022	Ontario Veterinary College, University of Guelph	Canadian Food Inspection Agency	Alkie, Tamiru; Cox, Sherri; Ojkic, Davor; Stevens, Brian; Xu, Wanhong; Hisanaga, Tamiko; Suderman, Suderman; Koziuk, Janice; Kruczkiewicz, Peter; Nguyen, Hoang Hai; Fisher, Mathew; Lung, Oliver; Berhane, Yohannes
EPI2236208	HA	Canada	2022-May-11	EPI_ISL_16013987	A/Red Fox/ON/FAV-0529-03/2022	Ontario Veterinary College, University of Guelph	Canadian Food Inspection Agency	Alkie, Tamiru; Cox, Sherri; Ojkic, Davor; Stevens, Brian; Xu, Wanhong; Hisanaga, Tamiko; Suderman, Suderman; Koziuk, Janice; Kruczkiewicz, Peter; Nguyen, Hoang Hai; Fisher, Mathew; Lung, Oliver; Berhane, Yohannes
EPI2236200	HA	Canada	2022-May-19	EPI_ISL_16013986	A/Red Fox/ON/FAV-0529-02/2022	Ontario Veterinary College, University of Guelph	Canadian Food Inspection Agency	Alkie, Tamiru; Cox, Sherri; Ojkic, Davor; Stevens, Brian; Xu, Wanhong; Hisanaga, Tamiko; Suderman, Suderman; Koziuk, Janice; Kruczkiewicz, Peter; Nguyen, Hoang Hai; Fisher, Mathew; Lung, Oliver; Berhane, Yohannes
EPI2235600	HA	Canada	2022-Apr-27	EPI_ISL_16003275	A/Red Fox/ON/FAV-0605-01/2022	Ontario Veterinary College, University of Guelph	Canadian Food Inspection Agency	Alkie, Tamiru; Cox, Sherri; Ojkic, Davor; Stevens, Brian; Xu, Wanhong; Hisanaga, Tamiko; Suderman, Suderman; Koziuk, Janice; Kruczkiewicz, Peter; Nguyen, Hoang Hai; Fisher, Mathew; Lung, Oliver; Berhane, Yohannes
EPI2235592	HA	Canada	2022-May-05	EPI_ISL_16003270	A/Red Fox/ON/FAV-0605-02/2022	Ontario Veterinary College, University of Guelph	Canadian Food Inspection Agency	Alkie, Tamiru; Cox, Sherri; Ojkic, Davor; Stevens, Brian; Xu, Wanhong; Hisanaga, Tamiko; Suderman, Suderman; Koziuk, Janice; Kruczkiewicz, Peter; Nguyen, Hoang Hai; Fisher, Mathew; Lung, Oliver; Berhane, Yohannes
EPI2235576	HA	Canada	2022-May-09	EPI_ISL_16003267	A/Red Fox/MB/FAV-0414-12/2022	Manitoba Agriculture	Canadian Food Inspection Agency	Alkie, Tamiru; Cox, Sherri; Pople, Neil; Xu, Wanhong; Hisanaga, Tamiko; Suderman, Suderman; Koziuk, Janice; Kruczkiewicz, Peter; Nguyen, Hoang Hai; Fisher, Mathew; Lung, Oliver; Berhane, Yohannes
EPI2235568	HA	Canada	2022-May-09	EPI_ISL_16003266	A/Red Fox/MB/FAV-414-08/2022	Manitoba Agriculture	Canadian Food Inspection Agency	Alkie, Tamiru; Cox, Sherri; Pople, Neil; Xu, Wanhong; Hisanaga, Tamiko; Suderman, Suderman; Koziuk, Janice; Kruczkiewicz, Peter; Nguyen, Hoang Hai; Fisher, Mathew; Lung, Oliver; Berhane, Yohannes
EPI2235552	HA	Canada	2022-Apr-07	EPI_ISL_16003253	A/Red Fox/MB/FAV-370-01/2022	Manitoba Agriculture	Canadian Food Inspection Agency	Alkie, Tamiru; Cox, Sherri; Pople, Neil; Xu, Wanhong; Hisanaga, Tamiko; Suderman, Suderman; Koziuk, Janice; Kruczkiewicz, Peter; Nguyen, Hoang Hai; Fisher, Mathew; Lung, Oliver; Berhane, Yohannes
EPI2182127	HA	United States	2022-Jun-08	EPI_ISL_15078253	A/red fox/Michigan/22-018712-001/2022	National Veterinary Services Laboratories - USDA	National Veterinary Services Laboratories - USDA	Chinh,Thanh;Love, Emily;Franzen,Kerrie;Killian,Mary;Koster,Leo;Lantz,Kristina;Stuber,Tod;Hicks,Jessica
EPI2182111	HA	United States	2022-Jun-03	EPI_ISL_15078251	A/red fox/North Dakota/22-017354-001/2022	National Veterinary Services Laboratories - USDA	National Veterinary Services Laboratories - USDA	Chinh,Thanh;Love, Emily;Franzen,Kerrie;Killian,Mary;Koster,Leo;Lantz,Kristina;Stuber,Tod;Hicks,Jessica
EPI2182095	HA	United States	2022-May-13	EPI_ISL_15078249	A/fox/Minnesota/22-016487-001/2022	National Veterinary Services Laboratories - USDA	National Veterinary Services Laboratories - USDA	Chinh,Thanh;Love, Emily;Franzen,Kerrie;Killian,Mary;Koster,Leo;Lantz,Kristina;Stuber,Tod;Hicks,Jessica
EPI2182079	HA	United States	2022-May-06	EPI_ISL_15078247	A/fox/Wisconsin/22-014746-030/2022	National Veterinary Services Laboratories - USDA	National Veterinary Services Laboratories - USDA	Chinh,Thanh;Love, Emily;Franzen,Kerrie;Killian,Mary;Koster,Leo;Lantz,Kristina;Stuber,Tod;Hicks,Jessica
EPI2182071	HA	United States	2022-May-03	EPI_ISL_15078246	A/fox/Wisconsin/22-014746-008/2022	National Veterinary Services Laboratories - USDA	National Veterinary Services Laboratories - USDA	Chinh,Thanh;Love, Emily;Franzen,Kerrie;Killian,Mary;Koster,Leo;Lantz,Kristina;Stuber,Tod;Hicks,Jessica
EPI2182063	HA	United States	2022-Apr-22	EPI_ISL_15078245	A/fox/Michigan/22-014536-004/2022	National Veterinary Services Laboratories - USDA	National Veterinary Services Laboratories - USDA	Chinh,Thanh;Love, Emily;Franzen,Kerrie;Killian,Mary;Koster,Leo;Lantz,Kristina;Stuber,Tod;Hicks,Jessica
EPI2158632	HA	United Kingdom	2021-Dec-07	EPI_ISL_14864640	A/fox/England/M0025-12-21/2021	Animal and Plant Health Agency (APHA)	Animal and Plant Health Agency (APHA)
EPI2158616	HA	United Kingdom	2022-Mar-09	EPI_ISL_14864638	A/fox/England/M0083-03-22/2022	Animal and Plant Health Agency (APHA)	Animal and Plant Health Agency (APHA)
EPI2131400	HA	United States	2022-May-12	EPI_ISL_14553997	A/Vulpes vulpes/New_York/115912/2022	Cornell University	Cornell University	Diel, Diego G; Caserta, Leonardo Cardia; Cronk, Brittany D.
EPI2131387	HA	United States	2022-May-10	EPI_ISL_14553811	A/Vulpes vulpes/New_York/103994/2022	Cornell University	Cornell University
EPI2131379	HA	United States	2022-Apr-04	EPI_ISL_14553810	A/Vulpes vulpes/New_York/099488/2022	Cornell University	Cornell University	Diel, Diego G; Caserta, Leonardo Cardia; Cronk, Brittany D.
EPI2130819	HA	United States	2022-Apr-04	EPI_ISL_14533193	A/Vulpes vulpes/New_York/074441/2022	Cornell University	Cornell University	Diel,Diego G; Caserta,Leonardo Cardia; Cronk, Brittany D
EPI2129816	HA	Belgium	2022-Apr-16	EPI_ISL_14493899	A/Vulpes_vulpes/Belgium/8660_0016/2022	Sciensano - Animal Infectious Diseases	Sciensano, Department of Animal Infectious Diseases	Van Borm, Steven; Mathijs, Elisabeth; Roupie, Virginie; Vervaeke, Muriel; Lambrecht, Benedicte; Steensels, Mieke
EPI1945585	HA	Estonia	2021-Nov-08	EPI_ISL_7778880	A/Red_fox/Estonia/TA2126820_21VIR10433-13/2021	Estonian Veterinary and Food Laboratory	Istituto Zooprofilattico Sperimentale Delle Venezie	Nurmoja, I.; Vilem, A.; Juurik, T.; Zecchin, B.; Fusaro, A.; Schivo, A.; Salviato, A.; Palumbo, E.; Milani, A.; Giussani, E.; Pastori, A.; Monne, I.; Terregino, C.
EPI1859945	HA	Netherlands	2021-May-17	EPI_ISL_2194218	A/red fox/Netherlands/21028774-002/2021	Wageningen Bioveterinary Research	Wageningen Bioveterinary Research	Beerens, Nancy; Harders, Frank; Pritz-Verschuren, Sylvia; Roose, Marit; Germeraad, Evelien; Engelsma, Marc; Bossers, Alex; Heutink, Rene
EPI2914899	HA	Finland	2023-Aug-03	EPI_ISL_18764855	A/blue fox/Finland/UH-004-E1/2023	University of Helsinki, Department of Virology	Finnish Institute for Health and Welfare, THL	Altan, E ; Avelin, V; Lindh, E; Kakkola, L; Tammiranta, N; Nokireki, T; Gadd, T; Ikonen, N; Savolainen-Kopra, C; Sironen, T; √ñsterlund, P.
EPI2892568	HA	Finland	2023-Aug-01	EPI_ISL_18728100	A/arctic-fox/Finland/677/2023	Finnish Food Authority	Finnish Food Authority	Kauppinen, Ari; Kareinen, Lauri; Tammiranta, Niina; Kantala, Tuija; Fusaro, Alice; Giussani, Edoardo; Gadd, Tuija
EPI2794121	HA	Latvia	2023-May-25	EPI_ISL_18509071	A/fox/Latvia/34393_23VIR8835-1/2023	Institute of Food Safety, Animal Health and Environment "BIOR"	Istituto Zooprofilattico Sperimentale Delle Venezie	Krivko, L.; Pastori, A.; Zecchin, B.; Fusaro, A.; Schivo, A.; Salviato, A.; Palumbo, E.; Giussani, E.; Monne, I.; Terregino, C.
EPI2755726	HA	Finland	2023-Aug-21	EPI_ISL_18290490	A/arctic-fox/Finland/1909/2023	Finnish Food Authority	Finnish Food Authority	Kauppinen, Ari; Kareinen, Lauri; Tammiranta, Niina; Kantala, Tuija; Fusaro, Alice; Gadd, Tuija
EPI2755718	HA	Finland	2023-Aug-21	EPI_ISL_18290489	A/arctic-fox/Finland/1908/2023	Finnish Food Authority	Finnish Food Authority	Kauppinen, Ari; Kareinen, Lauri; Tammiranta, Niina; Kantala, Tuija; Fusaro, Alice; Gadd, Tuija
EPI2755690	HA	Finland	2023-Aug-10	EPI_ISL_18290484	A/fox/Finland/1361/2023	Finnish Food Authority	Finnish Food Authority	Kauppinen, Ari; Kareinen, Lauri; Tammiranta, Niina; Kantala, Tuija; Fusaro, Alice; Gadd, Tuija
EPI2755667	HA	Finland	2023-Aug-07	EPI_ISL_18290481	A/arctic-fox/Finland/738/2023	Finnish Food Authority	Finnish Food Authority	Kauppinen, Ari; Kareinen, Lauri; Tammiranta, Niina; Kantala, Tuija; Fusaro, Alice; Gadd, Tuija
EPI2755629	HA	Finland	2023-Aug-09	EPI_ISL_18290476	A/arctic-fox/Finland/1086/2023	Finnish Food Authority	Finnish Food Authority	Kauppinen, Ari; Kareinen, Lauri; Tammiranta, Niina; Kantala, Tuija; Fusaro, Alice; Gadd, Tuija
EPI2755615	HA	Finland	2023-Aug-08	EPI_ISL_18290474	A/arctic-fox/Finland/783/2023	Finnish Food Authority	Finnish Food Authority	Kauppinen, Ari; Kareinen, Lauri; Tammiranta, Niina; Kantala, Tuija; Fusaro, Alice; Gadd, Tuija
EPI2755607	HA	Finland	2023-Aug-07	EPI_ISL_18290473	A/arctic-fox/Finland/736/2023	Finnish Food Authority	Finnish Food Authority	Kauppinen, Ari; Kareinen, Lauri; Tammiranta, Niina; Kantala, Tuija; Fusaro, Alice; Gadd, Tuija
EPI2755591	HA	Finland	2023-Aug-01	EPI_ISL_18290471	A/arctic-fox/Finland/673/2023	Finnish Food Authority	Finnish Food Authority	Kauppinen, Ari; Kareinen, Lauri; Tammiranta, Niina; Kantala, Tuija; Fusaro, Alice; Gadd, Tuija
EPI2755575	HA	Finland	2023-Jul-14	EPI_ISL_18290469	A/arctic-fox/Finland/545/2023	Finnish Food Authority	Finnish Food Authority	Kauppinen, Ari; Kareinen, Lauri; Tammiranta, Niina; Kantala, Tuija; Fusaro, Alice; Gadd, Tuija
EPI2122960	HA	Netherlands	2022-Feb-15	EPI_ISL_14393126	A/Fox/Netherlands/EMC6/2022	Erasmus Medical Center	Erasmus Medical Center
EPI2122945	HA	Netherlands	2022-Apr-02	EPI_ISL_14393097	A/Fox/Netherlands/EMC4/2022	Erasmus Medical Center	Erasmus Medical Center
EPI2018060	HA	Netherlands	2022-Jan-26	EPI_ISL_12066188	A/Fox/Netherlands/EMC1/2022	Erasmus Medical Center	Erasmus Medical Center	R.A.M., Fouchier; S., Therwessen; O., Vuong; I., Chestakova; R., Sikkema; P., Lexmond; M., Pronk
EPI1995282	HA	Netherlands	2022-Feb-07	EPI_ISL_11019882	A/red fox/Netherlands/22002636-002/2022	Wageningen Bioveterinary Research	Wageningen Bioveterinary Research	Beerens, Nancy; Harders, Frank; Pritz-Verschuren, Sylvia; Roose, Marit; Venema, Sandra; Germeraad, Evelien; Engelsma, Marc; Heutink, Rene
EPI1995273	HA	Netherlands	2022-Jan-03	EPI_ISL_11019784	A/red fox/Netherlands/22000097-005/2022	Wageningen Bioveterinary Research	Wageningen Bioveterinary Research	Beerens, Nancy; Harders, Frank; Pritz-Verschuren, Sylvia; Roose, Marit; Venema, Sandra; Germeraad, Evelien; Engelsma, Marc; Heutink, Rene
EPI1988053	HA	Netherlands	2022-Feb-18	EPI_ISL_10454887	A/red fox/Netherlands/22003495-003/2022	Wageningen Bioveterinary Research	Wageningen Bioveterinary Research	Beerens, Nancy; Harders, Frank; Pritz-Verschuren, Sylvia; Roose, Marit; Venema, Sandra; Germeraad, Evelien; Engelsma, Marc; Heutink, Rene
EPI1987364	HA	Netherlands	2022-Feb-11	EPI_ISL_10255587	A/red fox/Netherlands/22002993-003 /2022	Wageningen Bioveterinary Research	Wageningen Bioveterinary Research	Beerens, Nancy; Harders, Frank; Pritz-Verschuren, Sylvia; Roose, Marit; Venema, Sandra; Germeraad, Evelien; Engelsma, Marc; Heutink, Rene
EPI1987356	HA	Netherlands	2022-Feb-11	EPI_ISL_10255581	A/red fox/Netherlands/22002992-003/2022	Wageningen Bioveterinary Research	Wageningen Bioveterinary Research	Beerens, Nancy; Harders, Frank; Pritz-Verschuren, Sylvia; Roose, Marit; Venema, Sandra; Germeraad, Evelien; Engelsma, Marc; Heutink, Rene
EPI1988017	HA	Netherlands	2021-Dec-03	EPI_ISL_7683138	A/red fox/Netherlands/21040099-007/2021	Wageningen Bioveterinary Research	Wageningen Bioveterinary Research	Beerens, Nancy; Harders, Frank; Pritz-Verschuren, Sylvia; Roose, Marit; Venema, Sandra; Germeraad, Evelien; Engelsma, Marc; Heutink, Rene
EPI1988009	HA	Netherlands	2021-Dec-03	EPI_ISL_7683137	A/red fox/Netherlands/21040099-006/2021	Wageningen Bioveterinary Research	Wageningen Bioveterinary Research	Beerens, Nancy; Harders, Frank; Pritz-Verschuren, Sylvia; Roose, Marit; Venema, Sandra; Germeraad, Evelien; Engelsma, Marc; Heutink, Rene
EPI1943565	HA	Netherlands	2021-Dec-03	EPI_ISL_7683118	A/red fox/Netherlands/21040099-001/2021	Wageningen Bioveterinary Research	Wageningen Bioveterinary Research	Beerens, Nancy; Harders, Frank; Pritz-Verschuren, Sylvia; Roose, Marit; Venema, Sandra; Germeraad, Evelien; Engelsma, Marc; Heutink, Rene
EPI3177558	HA	Germany	2023-Jun-12	EPI_ISL_19029378	A/Fox/Bavaria/i193/2023	Bayerisches Landesamt f√ºr Gesundheit und Lebensmittelsicherheit	Bayerisches Landesamt f√ºr Gesundheit und Lebensmittelsicherheit
EPI2730917	HA	United Kingdom	2023-Jul-26	EPI_ISL_18226744	A/red fox/Northern Ireland/22191/2023	AFBI - Agri-Food & Bioscience Institute	Agri-Food and Biosciences Institute (AFBINI)	Lagan, P.; Lemon, K.
EPI2730909	HA	United Kingdom	2023-Jul-26	EPI_ISL_18226743	A/red fox/Northern Ireland/22185/2023	AFBI - Agri-Food & Bioscience Institute	Agri-Food and Biosciences Institute (AFBINI)	Lagan, P.; Lemon, K.
EPI2697666	HA	Finland	2023-Jul-24	EPI_ISL_18123935	A/arctic-fox/Finland/615/2023	Finnish Food Authority	Finnish Institute for Health and Welfare, THL	Tuija Kantala, Alice Fusaro, Tuija Gadd, Monica Gallo, Niina Ikonen, Lauri Kareinen, Ari Kauppinen, Niina Tammiranta, Erika Lindh
EPI2697658	HA	Finland	2023-Jul-24	EPI_ISL_18123934	A/arctic-fox/Finland/614/2023	Finnish Food Authority	Finnish Institute for Health and Welfare, THL	Tuija Kantala, Alice Fusaro, Tuija Gadd, Monica Gallo, Niina Ikonen, Lauri Kareinen, Ari Kauppinen, Niina Tammiranta, Erika Lindh
EPI2697650	HA	Finland	2023-Jul-24	EPI_ISL_18123933	A/arctic-fox/Finland/613/2023	Finnish Food Authority	Finnish Institute for Health and Welfare, THL	Tuija Kantala, Alice Fusaro, Tuija Gadd, Monica Gallo, Niina Ikonen, Lauri Kareinen, Ari Kauppinen, Niina Tammiranta, Erika Lindh
EPI2697642	HA	Finland	2023-Jul-20	EPI_ISL_18123932	A/fox/Finland/610/2023	Finnish Food Authority	Finnish Institute for Health and Welfare, THL	Tuija Kantala, Alice Fusaro, Tuija Gadd, Monica Gallo, Niina Ikonen, Lauri Kareinen, Ari Kauppinen, Niina Tammiranta, Erika Lindh
EPI2697634	HA	Finland	2023-Jul-20	EPI_ISL_18123931	A/fox/Finland/602/2023	Finnish Food Authority	Finnish Institute for Health and Welfare, THL	Tuija Kantala, Alice Fusaro, Tuija Gadd, Monica Gallo, Niina Ikonen, Lauri Kareinen, Ari Kauppinen, Niina Tammiranta, Erika Lindh
EPI2697502	HA	Finland	2023-Jul-17	EPI_ISL_18122445	A/red-fox/Finland/553/2023	Finnish Food Authority	Finnish Institute for Health and Welfare, THL	Tuija Kantala, Alice Fusaro, Tuija Gadd, Monica Gallo, Niina Ikonen, Lauri Kareinen, Ari Kauppinen, Niina Tammiranta, Erika Lindh
EPI2697488	HA	Finland	2023-Jul-24	EPI_ISL_18122443	A/fox/Finland/612/2023	Finnish Food Authority	Finnish Institute for Health and Welfare, THL	Tuija Kantala, Alice Fusaro, Tuija Gadd, Monica Gallo, Niina Ikonen, Lauri Kareinen, Ari Kauppinen, Niina Tammiranta, Erika Lindh
EPI2697480	HA	Finland	2023-Jul-20	EPI_ISL_18122442	A/fox/Finland/603/2023	Finnish Food Authority	Finnish Institute for Health and Welfare, THL	Tuija Kantala, Alice Fusaro, Tuija Gadd, Monica Gallo, Niina Ikonen, Lauri Kareinen, Ari Kauppinen, Niina Tammiranta, Erika Lindh
EPI2697472	HA	Finland	2023-Jul-20	EPI_ISL_18122441	A/fox/Finland/601/2023	Finnish Food Authority	Finnish Institute for Health and Welfare, THL	Tuija Kantala, Alice Fusaro, Tuija Gadd, Monica Gallo, Niina Ikonen, Lauri Kareinen, Ari Kauppinen, Niina Tammiranta, Erika Lindh
EPI2697464	HA	Finland	2023-Jul-24	EPI_ISL_18122440	A/arctic-fox/Finland/622/2023	Finnish Food Authority	Finnish Institute for Health and Welfare, THL	Tuija Kantala, Alice Fusaro, Tuija Gadd, Monica Gallo, Niina Ikonen, Lauri Kareinen, Ari Kauppinen, Niina Tammiranta, Erika Lindh
EPI2697456	HA	Finland	2023-Jul-24	EPI_ISL_18122439	A/arctic-fox/Finland/621/2023	Finnish Food Authority	Finnish Institute for Health and Welfare, THL	Tuija Kantala, Alice Fusaro, Tuija Gadd, Monica Gallo, Niina Ikonen, Lauri Kareinen, Ari Kauppinen, Niina Tammiranta, Erika Lindh
EPI2697448	HA	Finland	2023-Jul-24	EPI_ISL_18122438	A/arctic-fox/Finland/620/2023	Finnish Food Authority	Finnish Institute for Health and Welfare, THL	Tuija Kantala, Alice Fusaro, Tuija Gadd, Monica Gallo, Niina Ikonen, Lauri Kareinen, Ari Kauppinen, Niina Tammiranta, Erika Lindh
EPI2697440	HA	Finland	2023-Jul-24	EPI_ISL_18122437	A/arctic-fox/Finland/619/2023	Finnish Food Authority	Finnish Institute for Health and Welfare, THL	Tuija Kantala, Alice Fusaro, Tuija Gadd, Monica Gallo, Niina Ikonen, Lauri Kareinen, Ari Kauppinen, Niina Tammiranta, Erika Lindh
EPI2697432	HA	Finland	2023-Jul-24	EPI_ISL_18122436	A/arctic-fox/Finland/618/2023	Finnish Food Authority	Finnish Institute for Health and Welfare, THL	Tuija Kantala, Alice Fusaro, Tuija Gadd, Monica Gallo, Niina Ikonen, Lauri Kareinen, Ari Kauppinen, Niina Tammiranta, Erika Lindh
EPI2697424	HA	Finland	2023-Jul-24	EPI_ISL_18122435	A/arctic-fox/Finland/616/2023	Finnish Food Authority	Finnish Institute for Health and Welfare, THL	Tuija Kantala, Alice Fusaro, Tuija Gadd, Monica Gallo, Niina Ikonen, Lauri Kareinen, Ari Kauppinen, Niina Tammiranta, Erika Lindh
EPI2697409	HA	Finland	2023-Jul-18	EPI_ISL_18122433	A/arctic-fox/Finland/577/2023	Finnish Food Authority	Finnish Institute for Health and Welfare, THL	Tuija Kantala, Alice Fusaro, Tuija Gadd, Monica Gallo, Niina Ikonen, Lauri Kareinen, Ari Kauppinen, Niina Tammiranta, Erika Lindh
EPI2697401	HA	Finland	2023-Jul-18	EPI_ISL_18122432	A/arctic-fox/Finland/576/2023	Finnish Food Authority	Finnish Institute for Health and Welfare, THL	Tuija Kantala, Alice Fusaro, Tuija Gadd, Monica Gallo, Niina Ikonen, Lauri Kareinen, Ari Kauppinen, Niina Tammiranta, Erika Lindh
EPI2697393	HA	Finland	2023-Jul-18	EPI_ISL_18122431	A/arctic-fox/Finland/575/2023	Finnish Food Authority	Finnish Institute for Health and Welfare, THL	Tuija Kantala, Alice Fusaro, Tuija Gadd, Monica Gallo, Niina Ikonen, Lauri Kareinen, Ari Kauppinen, Niina Tammiranta, Erika Lindh
EPI2697377	HA	Finland	2023-Jul-17	EPI_ISL_18122429	A/arctic-fox/Finland/567/2023	Finnish Food Authority	Finnish Institute for Health and Welfare, THL	Tuija Kantala, Alice Fusaro, Tuija Gadd, Monica Gallo, Niina Ikonen, Lauri Kareinen, Ari Kauppinen, Niina Tammiranta, Erika Lindh
EPI2697362	HA	Finland	2023-Jul-17	EPI_ISL_18122427	A/arctic-fox/Finland/565/2023	Finnish Food Authority	Finnish Institute for Health and Welfare, THL	Tuija Kantala, Alice Fusaro, Tuija Gadd, Monica Gallo, Niina Ikonen, Lauri Kareinen, Ari Kauppinen, Niina Tammiranta, Erika Lindh
EPI2697354	HA	Finland	2023-Jul-14	EPI_ISL_18122426	A/arctic-fox/Finland/549/2023	Finnish Food Authority	Finnish Institute for Health and Welfare, THL	Tuija Kantala, Alice Fusaro, Tuija Gadd, Monica Gallo, Niina Ikonen, Lauri Kareinen, Ari Kauppinen, Niina Tammiranta, Erika Lindh
EPI2697346	HA	Finland	2023-Jul-14	EPI_ISL_18122425	A/arctic-fox/Finland/547/2023	Finnish Food Authority	Finnish Institute for Health and Welfare, THL	Tuija Kantala, Alice Fusaro, Tuija Gadd, Monica Gallo, Niina Ikonen, Lauri Kareinen, Ari Kauppinen, Niina Tammiranta, Erika Lindh
EPI2697338	HA	Finland	2023-Jul-14	EPI_ISL_18122424	A/arctic-fox/Finland/544/2023	Finnish Food Authority	Finnish Institute for Health and Welfare, THL	Tuija Kantala, Alice Fusaro, Tuija Gadd, Monica Gallo, Niina Ikonen, Lauri Kareinen, Ari Kauppinen, Niina Tammiranta, Erika Lindh
EPI2697322	HA	Finland	2023-Jul-14	EPI_ISL_18122422	A/arctic-fox/Finland/542/2023	Finnish Food Authority	Finnish Institute for Health and Welfare, THL	Tuija Kantala, Alice Fusaro, Tuija Gadd, Monica Gallo, Niina Ikonen, Lauri Kareinen, Ari Kauppinen, Niina Tammiranta, Erika Lindh
EPI2697313	HA	Finland	2023-Jul-14	EPI_ISL_18122421	A/arctic-fox/Finland/536/2023	Finnish Food Authority	Finnish Institute for Health and Welfare, THL	Tuija Kantala, Alice Fusaro, Tuija Gadd, Monica Gallo, Niina Ikonen, Lauri Kareinen, Ari Kauppinen, Niina Tammiranta, Erika Lindh
EPI2697305	HA	Finland	2023-Jul-10	EPI_ISL_18122420	A/arctic-fox/Finland/504/2023	Finnish Food Authority	Finnish Institute for Health and Welfare, THL	Tuija Kantala, Alice Fusaro, Tuija Gadd, Monica Gallo, Niina Ikonen, Lauri Kareinen, Ari Kauppinen, Niina Tammiranta, Erika Lindh
EPI2697290	HA	Finland	2023-Jul-10	EPI_ISL_18122418	A/arctic-fox/Finland/495/2023	Finnish Food Authority	Finnish Institute for Health and Welfare, THL	Tuija Kantala, Alice Fusaro, Tuija Gadd, Monica Gallo, Niina Ikonen, Lauri Kareinen, Ari Kauppinen, Niina Tammiranta, Erika Lindh
EPI2608636	HA	Germany	2023-Mar-29	EPI_ISL_17880914	A/Red fox/Germany/51023-261/2023	Lower Saxony State Office for Consumer Protection and Food Safety	Lower Saxony State Office for Consumer Protection & Food Safety
EPI2608619	HA	Germany	2023-Feb-09	EPI_ISL_17880911	A/Red fox/Germany/51023-124/2023	Lower Saxony State Office for Consumer Protection and Food Safety	Lower Saxony State Office for Consumer Protection & Food Safety
EPI2608595	HA	Germany	2023-Jan-31	EPI_ISL_17880908	A/Red fox/Germany/51023-113/2023	Lower Saxony State Office for Consumer Protection and Food Safety	Lower Saxony State Office for Consumer Protection & Food Safety
EPI2608564	HA	Germany	2023-Jan-09	EPI_ISL_17880904	A/Red fox/Germany/51023-60/2023	Lower Saxony State Office for Consumer Protection and Food Safety	Lower Saxony State Office for Consumer Protection & Food Safety
EPI2467145	HA	France	2023-Feb-10	EPI_ISL_17233302	A/fox/France/23P002844/2023	Anses (Ploufragan-Plouzan√©)	ANSES Agence Nationale De Securite Sanitaire De L‚Äôalimentation
EPI2297256	HA	Belgium	2022-Dec-08	EPI_ISL_16549380	A/Vulpes_vulpes/Belgium/14775-0001/2022	Sciensano - Animal Infectious Diseases	Sciensano, Department of Animal Infectious Diseases	Van Borm, Steven; Roupie, Virginie; Hostyn, Pierre; Lambrecht, Benedicte; Steensels, Mieke
EPI2764342	HA	Belgium	2023-May-17	EPI_ISL_18347730	A/Vulpes_vulpes/Belgium/04757_0004/2023	Sciensano - Animal Infectious Diseases	Sciensano, Department of Animal Infectious Diseases	Van Borm, Steven; Roupie, Virginie; Hostyn, Pierre; Mathijs, Elisabeth; Lambrecht, Benedicte; Steensels, Mieke
EPI2607404	HA	Japan	2023-Feb-20	EPI_ISL_17857959	A/Ezo red fox/Hokkaido/3/2023	Graduate School of Veterinary Medicine, Hokkaido University	Graduate School of Veterinary Medicine, Hokkaido University	Yoshihiro, Sakoda; Norikazu, Isoda; Takahiro, Hiono; Yik Lim, Hew; Tatsuru, Morita
EPI2585317	HA	Belgium	2023-Apr-24	EPI_ISL_17774571	A/Vulpes_Vulpes/Belgium/04018_0005/2023	Sciensano - Animal Infectious Diseases	Sciensano, Department of Animal Infectious Diseases	Van Borm, Steven; Roupie, Virginie; Hostyn, Pierre; Mathijs, Elisabeth; Lambrecht, Benedicte; Steensels, Mieke
EPI2585308	HA	Belgium	2023-Apr-24	EPI_ISL_17774570	A/Vulpes_Vulpes/Belgium/04016_0001/2023	Sciensano - Animal Infectious Diseases	Sciensano, Department of Animal Infectious Diseases	Van Borm, Steven; Roupie, Virginie; Hostyn, Pierre; Mathijs, Elisabeth; Lambrecht, Benedicte; Steensels, Mieke
EPI2585300	HA	Belgium	2023-Apr-14	EPI_ISL_17774358	A/Vulpes_Vulpes/Belgium/03704_0001/2023	Sciensano - Animal Infectious Diseases	Sciensano, Department of Animal Infectious Diseases	Van Borm, Steven; Roupie, Virginie; Hostyn, Pierre; Mathijs, Elisabeth; Lambrecht, Benedicte; Steensels, Mieke
EPI2585292	HA	Belgium	2023-Apr-14	EPI_ISL_17774357	A/Vulpes_Vulpes/Belgium/03703_0007/2023	Sciensano - Animal Infectious Diseases	Sciensano, Department of Animal Infectious Diseases	Van Borm, Steven; Roupie, Virginie; Hostyn, Pierre; Mathijs, Elisabeth; Lambrecht, Benedicte; Steensels, Mieke
EPI2585283	HA	Belgium	2023-Apr-14	EPI_ISL_17774308	A/Vulpes_Vulpes/Belgium/03703_0003/2023	Sciensano - Animal Infectious Diseases	Sciensano, Department of Animal Infectious Diseases	Van Borm, Steven; Roupie, Virginie; Hostyn, Pierre; Mathijs, Elisabeth; Lambrecht, Benedicte; Steensels, Mieke
EPI2585275	HA	Belgium	2023-Apr-14	EPI_ISL_17774224	A/Vulpes_Vulpes/Belgium/03703_0001/2023	Sciensano - Animal Infectious Diseases	Sciensano, Department of Animal Infectious Diseases	Van Borm, Steven; Roupie, Virginie; Hostyn, Pierre; Mathijs, Elisabeth; Lambrecht, Benedicte; Steensels, Mieke
EPI2584339	HA	Japan	2023-Apr-12	EPI_ISL_17766057	A/Ezo red fox/Hokkaido/2/2023	Graduate School of Veterinary Medicine, Hokkaido University	Graduate School of Veterinary Medicine, Hokkaido University	Yoshihiro,Sakoda; Norikazu,Isoda; Takahiro,Hiono; Yik Lim,Hew; Tatsuru,Morita
EPI2540297	HA	Belgium	2023-Feb-10	EPI_ISL_17606263	A/Vulpes_vulpes/Belgium/01295_0002/2023	Sciensano - Animal Infectious Diseases	Sciensano, Department of Animal Infectious Diseases	Van Borm, Steven; Roupie, Virginie; Hostyn, Pierre; Mathijs, Elisabeth; Lambrecht, Benedicte; Steensels, Mieke
EPI2499738	HA	Canada	2022-Apr-15	EPI_ISL_17393093	A/Red Fox/ON/FAV-0301-05/2022	Ontario Veterinary College, University of Guelph	Canadian Food Inspection Agency	Alkie, T; Ojkic, D; Stevens, B; Xu, W; Hisanaga, T; Koziuk, T; Fisher, M; Lung, O; Berhane, Y
EPI2259579	HA	Canada	2022-Apr-15	EPI_ISL_16248229	A/Red fox/ON/FAV-0301-05/2022	Ontario Veterinary College, University of Guelph	Canadian Food Inspection Agency	Alkie, Tamiru; Cox, Sherri; Ojkic, Davor; Stevens, Brian; Xu, Wanhong; Hisanaga, Tamiko; Suderman, Suderman; Koziuk, Janice; Kruczkiewicz, Peter; Nguyen, Hoang Hai; Fisher, Mathew; Lung, Oliver; Berhane, Yohannes
EPI2259571	HA	Canada	2022-May-24	EPI_ISL_16244526	A/Red fox/PEI/FAV-0592-01/2022	Atlantic Veterinary College, University of Prince Edward Island	Canadian Food Inspection Agency	Alkie, Tamiru; Yason, Carmencita; Jones, Megan E. B.; Bourque, Laura; Xu, Wanhong; Hisanaga, Tamiko; Suderman, Suderman; Koziuk, Janice; Kruczkiewicz, Peter; Nguyen, Hoang Hai; Fisher, Mathew; Lung, Oliver; Berhane, Yohannes
EPI2259319	HA	United States	2022-May-11	EPI_ISL_16243970	A/fox/Iowa/22-015357-002/2022	National Veterinary Services Laboratories - USDA	National Veterinary Services Laboratories - USDA	Chinh,Thanh;Love, Emily;Franzen,Kerrie;Killian,Mary;Koster,Leo;Lantz,Kristina;Stuber,Tod;Hicks,Jessica
EPI2258919	HA	United States	2022-Apr-22	EPI_ISL_16240637	A/fox/Michigan/22-014536-008/2022	National Veterinary Services Laboratories - USDA	National Veterinary Services Laboratories - USDA	Chinh,Thanh;Love, Emily;Franzen,Kerrie;Killian,Mary;Koster,Leo;Lantz,Kristina;Stuber,Tod;Hicks,Jessica
EPI2258911	HA	United States	2022-Apr-22	EPI_ISL_16240636	A/fox/Michigan/22-014536-007/2022	National Veterinary Services Laboratories - USDA	National Veterinary Services Laboratories - USDA	Chinh,Thanh;Love, Emily;Franzen,Kerrie;Killian,Mary;Koster,Leo;Lantz,Kristina;Stuber,Tod;Hicks,Jessica
EPI2258903	HA	United States	2022-Apr-22	EPI_ISL_16240635	A/fox/Michigan/22-014536-002/2022	National Veterinary Services Laboratories - USDA	National Veterinary Services Laboratories - USDA	Chinh,Thanh;Love, Emily;Franzen,Kerrie;Killian,Mary;Koster,Leo;Lantz,Kristina;Stuber,Tod;Hicks,Jessica
EPI2258895	HA	United States	2022-Apr-22	EPI_ISL_16240634	A/fox/Michigan/22-014536-001/2022	National Veterinary Services Laboratories - USDA	National Veterinary Services Laboratories - USDA	Chinh,Thanh;Love, Emily;Franzen,Kerrie;Killian,Mary;Koster,Leo;Lantz,Kristina;Stuber,Tod;Hicks,Jessica
EPI2236678	HA	Canada	2022-Jun-10	EPI_ISL_16023371	A/Red Fox/AB/FAV-0835-13/2022	Alberta Agriculture and Forestry, Government of Alberta	Canadian Food Inspection Agency	Alkie, Tamiru; Hicks, Mark; Pybuse, Margo J; Xu, Wanhong; Hisanaga, Tamiko; Suderman, Suderman; Koziuk, Janice; Kruczkiewicz, Peter; Nguyen, Hoang Hai; Fisher, Mathew; Lung, Oliver; Berhane, Yohannes
EPI2236670	HA	Canada	2022-May-05	EPI_ISL_16023370	A/Red Fox/AB/FAV-0835-02/2022	Alberta Agriculture and Forestry, Government of Alberta	Canadian Food Inspection Agency	Alkie, Tamiru; Hicks, Mark; Pybuse, Margo J; Xu, Wanhong; Hisanaga, Tamiko; Suderman, Suderman; Koziuk, Janice; Kruczkiewicz, Peter; Nguyen, Hoang Hai; Fisher, Mathew; Lung, Oliver; Berhane, Yohannes
EPI2236553	HA	Canada	2022-May-05	EPI_ISL_16023345	A/Red Fox/AB/FAV-0835-01/2022	Alberta Agriculture and Forestry, Government of Alberta	Canadian Food Inspection Agency	Alkie, Tamiru; Hicks, Mark; Pybuse, Margo; Xu, Wanhong; Hisanaga, Tamiko; Suderman, Suderman; Koziuk, Janice; Kruczkiewicz, Peter; Nguyen, Hoang Hai; Fisher, Mathew; Lung, Oliver; Berhane, Yohannes
EPI2236495	HA	Canada	2022-May-24	EPI_ISL_16020774	A/Red Fox/PEI/FAV-0591-01/2022	Atlantic Veterinary College, University of Prince Edward Island	Canadian Food Inspection Agency	Alkie, Tamiru; Yason, Carmencita; Jones, E.B. Megan; Bourque, Laura; Xu, Wanhong; Hisanaga, Tamiko; Suderman, Suderman; Koziuk, Janice; Kruczkiewicz, Peter; Nguyen, Hoang Hai; Fisher, Mathew; Lung, Oliver; Berhane, Yohannes
EPI2236487	HA	Canada	2022-May-19	EPI_ISL_16020773	A/Red Fox/PEI/FAV-0544/2022	Atlantic Veterinary College, University of Prince Edward Island	Canadian Food Inspection Agency	Alkie, Tamiru; Yason, Carmencita; Jones, E.B. Megan; Bourque, Laura; Xu, Wanhong; Hisanaga, Tamiko; Suderman, Suderman; Koziuk, Janice; Kruczkiewicz, Peter; Nguyen, Hoang Hai; Fisher, Mathew; Lung, Oliver; Berhane, Yohannes
EPI2236479	HA	Canada	2022-May-24	EPI_ISL_16020772	A/Red Fox/PEI/FAV-0592-02/2022	Atlantic Veterinary College, University of Prince Edward Island	Canadian Food Inspection Agency	Alkie, Tamiru; Yason, Carmencita; Jones, E.B. Megan; Bourque, Laura; Xu, Wanhong; Hisanaga, Tamiko; Suderman, Suderman; Koziuk, Janice; Kruczkiewicz, Peter; Nguyen, Hoang Hai; Fisher, Mathew; Lung, Oliver; Berhane, Yohannes
EPI2236768	HA	Canada	2022-Apr-22	EPI_ISL_16014529	A/Red Fox/ON/FAV-0558-02/2022	Ontario Veterinary College, University of Guelph	Canadian Food Inspection Agency	Alkie, Tamiru; Cox, Sherri; Ojkic, Davor; Stevens, Brian; Xu, Wanhong; Hisanaga, Tamiko; Suderman, Suderman; Koziuk, Janice; Kruczkiewicz, Peter; Nguyen, Hoang Hai; Fisher, Mathew; Lung, Oliver; Berhane, Yohannes
EPI2236292	HA	Canada	2022-Apr-22	EPI_ISL_16014527	A/Red Fox/ON/FAV-0558-01/2022	Ontario Veterinary College, University of Guelph	Canadian Food Inspection Agency	Alkie, Tamiru; Cox, Sherri; Ojkic, Davor; Stevens, Brian; Xu, Wanhong; Hisanaga, Tamiko; Suderman, Suderman; Koziuk, Janice; Kruczkiewicz, Peter; Nguyen, Hoang Hai; Fisher, Mathew; Lung, Oliver; Berhane, Yohannes
EPI2236256	HA	Canada	2022-Apr-16	EPI_ISL_16014448	A/Red Fox/ON/FAV-0531/2022	Ontario Veterinary College, University of Guelph	Canadian Food Inspection Agency	Alkie, Tamiru; Cox, Sherri; Ojkic, Davor; Stevens, Brian; Xu, Wanhong; Hisanaga, Tamiko; Suderman, Suderman; Koziuk, Janice; Kruczkiewicz, Peter; Nguyen, Hoang Hai; Fisher, Mathew; Lung, Oliver; Berhane, Yohannes
EPI2236248	HA	Canada	2022-Apr-13	EPI_ISL_16014445	A/Red Fox/ON/FAV-0300-06/2022	Ontario Veterinary College, University of Guelph	Canadian Food Inspection Agency	Alkie, Tamiru; Cox, Sherri; Ojkic, Davor; Stevens, Brian; Xu, Wanhong; Hisanaga, Tamiko; Suderman, Suderman; Koziuk, Janice; Kruczkiewicz, Peter; Nguyen, Hoang Hai; Fisher, Mathew; Lung, Oliver; Berhane, Yohannes
EPI2236240	HA	Canada	2022-Apr-22	EPI_ISL_16014368	A/Red Fox/ON/FAV-0300-05/2022	Ontario Veterinary College, University of Guelph	Canadian Food Inspection Agency	Alkie, Tamiru; Cox, Sherri; Ojkic, Davor; Stevens, Brian; Xu, Wanhong; Hisanaga, Tamiko; Suderman, Suderman; Koziuk, Janice; Kruczkiewicz, Peter; Nguyen, Hoang Hai; Fisher, Mathew; Lung, Oliver; Berhane, Yohannes
EPI2131367	HA	United States	2022-May-04	EPI_ISL_14552975	A/Vulpes vulpes/New_York/099451/2022	Cornell University	Cornell University	Diel, Diego G; Caserta, Leonardo Cardia; Cronk, Brittany D.
EPI2129832	HA	Belgium	2022-Jun-16	EPI_ISL_14494796	A/Vulpes_vulpes/Belgium/9031_0008/2022	Sciensano - Animal Infectious Diseases	Sciensano, Department of Animal Infectious Diseases	Van Borm, Steven; Mathijs, Elisabeth; Roupie, Virginie; Vervaeke, Muriel; Lambrecht, Benedicte; Steensels, Mieke
EPI2053953	HA	United States	2022-May-06	EPI_ISL_13052728	A/fox/Wisconsin/22-014746-029/2022	National Veterinary Services Laboratories - USDA	National Veterinary Services Laboratories - USDA	Chinh,Thanh;Franzen,Kerrie;Love, Emily;Killian,Mary;Koster,Leo;Lantz,Kristina;Stuber,Tod;Hicks,Jessica
EPI2053945	HA	United States	2022-May-06	EPI_ISL_13052727	A/fox/Wisconsin/22-014746-023/2022	National Veterinary Services Laboratories - USDA	National Veterinary Services Laboratories - USDA	Chinh,Thanh;Franzen,Kerrie;Love, Emily;Killian,Mary;Koster,Leo;Lantz,Kristina;Stuber,Tod;Hicks,Jessica
EPI2053937	HA	United States	2022-May-03	EPI_ISL_13052726	A/fox/Wisconsin/22-014746-016/2022	National Veterinary Services Laboratories - USDA	National Veterinary Services Laboratories - USDA	Chinh,Thanh;Franzen,Kerrie;Love, Emily;Killian,Mary;Koster,Leo;Lantz,Kristina;Stuber,Tod;Hicks,Jessica
EPI2053929	HA	United States	2022-May-03	EPI_ISL_13052725	A/fox/Wisconsin/22-014746-010/2022	National Veterinary Services Laboratories - USDA	National Veterinary Services Laboratories - USDA	Chinh,Thanh;Franzen,Kerrie;Love, Emily;Killian,Mary;Koster,Leo;Lantz,Kristina;Stuber,Tod;Hicks,Jessica
EPI2053921	HA	United States	2022-May-09	EPI_ISL_13052724	A/fox/Minnesota/22-014661-001/2022	National Veterinary Services Laboratories - USDA	National Veterinary Services Laboratories - USDA	Chinh,Thanh;Franzen,Kerrie;Love, Emily;Killian,Mary;Koster,Leo;Lantz,Kristina;Stuber,Tod;Hicks,Jessica
EPI2053913	HA	United States	2022-May-10	EPI_ISL_13052723	A/fox/Minnesota/22-014660-002/2022	National Veterinary Services Laboratories - USDA	National Veterinary Services Laboratories - USDA	Chinh,Thanh;Franzen,Kerrie;Love, Emily;Killian,Mary;Koster,Leo;Lantz,Kristina;Stuber,Tod;Hicks,Jessica
EPI2053905	HA	United States	2022-May-10	EPI_ISL_13052722	A/fox/Minnesota/22-014660-001/2022	National Veterinary Services Laboratories - USDA	National Veterinary Services Laboratories - USDA	Chinh,Thanh;Franzen,Kerrie;Love, Emily;Killian,Mary;Koster,Leo;Lantz,Kristina;Stuber,Tod;Hicks,Jessica
EPI2053897	HA	United States	2022-May-06	EPI_ISL_13052721	A/fox/Iowa/22-014421-001/2022	National Veterinary Services Laboratories - USDA	National Veterinary Services Laboratories - USDA	Chinh,Thanh;Franzen,Kerrie;Love, Emily;Killian,Mary;Koster,Leo;Lantz,Kristina;Stuber,Tod;Hicks,Jessica
EPI2053889	HA	United States	2022-Apr-22	EPI_ISL_13052720	A/fox/Minnesota/22-014182-001/2022	National Veterinary Services Laboratories - USDA	National Veterinary Services Laboratories - USDA	Chinh,Thanh;Franzen,Kerrie;Love, Emily;Killian,Mary;Koster,Leo;Lantz,Kristina;Stuber,Tod;Hicks,Jessica
EPI2053881	HA	United States	2022-May-01	EPI_ISL_13052719	A/fox/Wisconsin/22-013774-014/2022	National Veterinary Services Laboratories - USDA	National Veterinary Services Laboratories - USDA	Chinh,Thanh;Franzen,Kerrie;Love, Emily;Killian,Mary;Koster,Leo;Lantz,Kristina;Stuber,Tod;Hicks,Jessica
EPI2053873	HA	United States	2022-May-01	EPI_ISL_13052718	A/fox/Wisconsin/22-013774-009/2022	National Veterinary Services Laboratories - USDA	National Veterinary Services Laboratories - USDA	Chinh,Thanh;Franzen,Kerrie;Love, Emily;Killian,Mary;Koster,Leo;Lantz,Kristina;Stuber,Tod;Hicks,Jessica
EPI2053865	HA	United States	2022-May-01	EPI_ISL_13052717	A/fox/Wisconsin/22-013774-002/2022	National Veterinary Services Laboratories - USDA	National Veterinary Services Laboratories - USDA	Chinh,Thanh;Franzen,Kerrie;Love, Emily;Killian,Mary;Koster,Leo;Lantz,Kristina;Stuber,Tod;Hicks,Jessica
EPI2021932	HA	Japan	2022-Mar-31	EPI_ISL_12174842	A/Ezo red fox/Hokkaido/1/2022	Graduate School of Veterinary Medicine, Hokkaido University	Graduate School of Veterinary Medicine, Hokkaido University	Yoshihiro, SAKODA; Takahiro, HIONO; Norikazu, ISODA
EPI1998138	HA	Ireland	2022-Feb-14	EPI_ISL_11259283	A/fox/Ireland/3866_22VIR2064-1/2022	Central Veterinary Research Laboratory	Istituto Zooprofilattico Sperimentale delle Venezie	Byrne, C.; Garcia, K.; Cuartero, L.G.; Barbierato, G.; Zecchin, B.; Fusaro, A.; Schivo, A.; Salviato, A.; Palumbo, E.; Giussani, E.; Monne, I.; Terregino, C.
EPI3217373	NA	Netherlands	2021-Dec-03	EPI_ISL_19057417	A/red fox/Netherlands/21040099-006_PB2K/2021	Wageningen Bioveterinary Research	Wageningen Bioveterinary Research	Beerens, Nancy; Harders, Frank; Pritz-Verschuren, Sylvia; Roose, Marit; Venema, Sandra; Germeraad, Evelien; Engelsma, Marc; Heutink, Rene
EPI3217365	NA	Netherlands	2021-Dec-03	EPI_ISL_19057416	A/red fox/Netherlands/21040099-006_PB2E/2021	Wageningen Bioveterinary Research	Wageningen Bioveterinary Research	Beerens, Nancy; Harders, Frank; Pritz-Verschuren, Sylvia; Roose, Marit; Venema, Sandra; Germeraad, Evelien; Engelsma, Marc; Heutink, Rene
EPI2837098	NA	Finland	2023-Aug-07	EPI_ISL_18618528	A/arctic-fox/Finland/752/2023	Finnish Food Authority	Finnish Food Authority	Kauppinen, Ari; Kareinen, Lauri; Tammiranta, Niina; Kantala, Tuija; Fusaro, Alice; Gadd, Tuija
EPI2837090	NA	Finland	2023-Aug-04	EPI_ISL_18618442	A/arctic-fox/Finland/682/2023	Finnish Food Authority	Finnish Food Authority	Kauppinen, Ari; Kareinen, Lauri; Tammiranta, Niina; Kantala, Tuija; Fusaro, Alice; Gadd, Tuija
EPI2760285	NA	Finland	2023-Jul-10	EPI_ISL_18321745	A/arctic-fox/Finland/HVVI_503_23_23VIR6803-6/2023	Finnish Food Authority	Istituto Zooprofilattico Sperimentale Delle Venezie	Gadd, T.; Tammiranta, N; Kantala, K.; Nokireki, T.; Pastori, A.; Zecchin, B.; Fusaro, A.; Schivo, A.; Salviato, A.; Palumbo, E.; Giussani, E.; Monne, I.; Terregino, C.
EPI2760277	NA	Finland	2023-Jul-06	EPI_ISL_18321744	A/arctic-fox/Finland/HVVI_491_23_23VIR6803-1/2023	Finnish Food Authority	Istituto Zooprofilattico Sperimentale Delle Venezie	Gadd, T.; Tammiranta, N; Kantala, K.; Nokireki, T.; Pastori, A.; Zecchin, B.; Fusaro, A.; Schivo, A.; Salviato, A.; Palumbo, E.; Giussani, E.; Monne, I.; Terregino, C.
EPI2760269	NA	Finland	2023-Jul-06	EPI_ISL_18321743	A/arctic-fox/Finland/HVVI_492_23_23VIR6803-2/2023	Finnish Food Authority	Istituto Zooprofilattico Sperimentale Delle Venezie	Gadd, T.; Tammiranta, N; Kantala, K.; Nokireki, T.; Pastori, A.; Zecchin, B.; Fusaro, A.; Schivo, A.; Salviato, A.; Palumbo, E.; Giussani, E.; Monne, I.; Terregino, C.
EPI2755501	NA	Finland	2023-Aug-04	EPI_ISL_18292963	A/arctic-fox/Finland/684/2023	Finnish Food Authority	Finnish Food Authority	Kauppinen, Ari; Kareinen, Lauri; Tammiranta, Niina; Kantala, Tuija; Fusaro, Alice; Giussani, Edoardo; Gadd, Tuija
EPI2755461	NA	Finland	2023-Aug-01	EPI_ISL_18292958	A/arctic-fox/Finland/675/2023	Finnish Food Authority	Finnish Food Authority	Kauppinen, Ari; Kareinen, Lauri; Tammiranta, Niina; Kantala, Tuija; Fusaro, Alice; Giussani, Edoardo; Gadd, Tuija
EPI2755437	NA	Finland	2023-Jul-31	EPI_ISL_18292955	A/arctic-fox/Finland/670/2023	Finnish Food Authority	Finnish Food Authority	Kauppinen, Ari; Kareinen, Lauri; Tammiranta, Niina; Kantala, Tuija; Fusaro, Alice; Galiano, Monica; Ikonen, Niina; Lindh, Erika; Gadd, Tuija
EPI2755429	NA	Finland	2023-Jul-31	EPI_ISL_18292954	A/arctic-fox/Finland/666/2023	Finnish Food Authority	Finnish Food Authority	Kauppinen, Ari; Kareinen, Lauri; Tammiranta, Niina; Kantala, Tuija; Fusaro, Alice; Galiano, Monica; Ikonen, Niina; Lindh, Erika; Gadd, Tuija
EPI2701782	NA	Finland	2023-Aug-04	EPI_ISL_18131280	A/blue fox/Finland/2023AI06876_071/2023	University of Helsinki, Department of Virology	Friedrich-Loeffler-Institut
EPI2701774	NA	Finland	2023-Aug-04	EPI_ISL_18131279	A/silver fox/Finland/2023AI06834_029/2023	University of Helsinki, Department of Virology	Friedrich-Loeffler-Institut
EPI2701766	NA	Finland	2023-Aug-03	EPI_ISL_18131278	A/silver fox/Finland/2023AI06838_033/2023	University of Helsinki, Department of Virology	Friedrich-Loeffler-Institut
EPI2701758	NA	Finland	2023-Aug-03	EPI_ISL_18131277	A/red fox/Finland/2023AI06879_074/2023	University of Helsinki, Department of Virology	Friedrich-Loeffler-Institut
EPI2701750	NA	Finland	2023-Aug-03	EPI_ISL_18131276	A/blue fox/Finland/2023AI06820_015/2023	University of Helsinki, Department of Virology	Friedrich-Loeffler-Institut
EPI2235562	NA	Canada	2022-May-09	EPI_ISL_16003265	A/Red Fox/MB/FAV-414-004/2022	Manitoba Agriculture	Canadian Food Inspection Agency	Alkie, Tamiru; Cox, Sherri; Pople, Neil; Xu, Wanhong; Hisanaga, Tamiko; Suderman, Suderman; Koziuk, Janice; Kruczkiewicz, Peter; Nguyen, Hoang Hai; Fisher, Mathew; Lung, Oliver; Berhane, Yohannes
EPI2197239	NA	Finland	2021-Nov-01	EPI_ISL_15518271	A/red_fox/Finland/2891_21RS3535-1/2021	Finnish Food Authority	Istituto Zooprofilattico Sperimentale Delle Venezie	Tammiranta, N.;Kantala, T.;Laamanen, I.;Gadd, T.;Zecchin, B.;Fusaro, A.;Schivo, A.;Salviato, A.;Palumbo, E.;Milani, A.;Giussani, E.;Pastori, A.;Monne, I.;Terregino, C.
EPI2197215	NA	Finland	2021-Sep-01	EPI_ISL_15518268	A/fox/Finland/2844_21VIR9619-1/2021	Finnish Food Authority	Istituto Zooprofilattico Sperimentale Delle Venezie	Tammiranta, N.;Kantala, T.;Laamanen, I.;Gadd, T.;Zecchin, B.;Fusaro, A.;Schivo, A.;Salviato, A.;Palumbo, E.;Giussani, E.;Pastori, A.;Monne, I.;Terregino, C.
EPI2018074	NA	Netherlands	2022-Jan-10	EPI_ISL_12069288	A/Fox/Netherlands/EMC2/2022	Erasmus Medical Center	Erasmus Medical Center	R.A.M., Fouchier; S., Thewessen; O., Vuong; I., Chestakova; R., Sikkema; P., Lexmond; M., Pronk
EPI1994445	NA	Netherlands	2022-Mar-01	EPI_ISL_10915976	A/red fox/Netherlands/22004172-003/2022	Wageningen Bioveterinary Research	Wageningen Bioveterinary Research	Beerens, Nancy; Harders, Frank; Pritz-Verschuren, Sylvia; Roose, Marit; Venema, Sandra; Germeraad, Evelien; Engelsma, Marc; Heutink, Rene
EPI1987225	NA	Netherlands	2022-Feb-08	EPI_ISL_10220428	A/red fox/Netherlands/22002722-004/2022	Wageningen Bioveterinary Research	Wageningen Bioveterinary Research	Beerens, Nancy; Harders, Frank; Pritz-Verschuren, Sylvia; Roose, Marit; Venema, Sandra; Germeraad, Evelien; Engelsma, Marc; Heutink, Rene
EPI1987217	NA	Netherlands	2022-Feb-07	EPI_ISL_10220427	A/red fox/Netherlands/22002636-005/2022	Wageningen Bioveterinary Research	Wageningen Bioveterinary Research	Beerens, Nancy; Harders, Frank; Pritz-Verschuren, Sylvia; Roose, Marit; Venema, Sandra; Germeraad, Evelien; Engelsma, Marc; Heutink, Rene
EPI1981019	NA	Netherlands	2022-Jan-31	EPI_ISL_9616272	A/red fox/Netherlands/22002191-003/2022	Wageningen Bioveterinary Research	Wageningen Bioveterinary Research	Beerens, Nancy; Harders, Frank; Pritz-Verschuren, Sylvia; Roose, Marit; Venema, Sandra; Germeraad, Evelien; Engelsma, Marc; Heutink, Rene
EPI1981011	NA	Netherlands	2022-Jan-31	EPI_ISL_9616271	A/red fox/Netherlands/22002190-003/2022	Wageningen Bioveterinary Research	Wageningen Bioveterinary Research	Beerens, Nancy; Harders, Frank; Pritz-Verschuren, Sylvia; Roose, Marit; Venema, Sandra; Germeraad, Evelien; Engelsma, Marc; Heutink, Rene
EPI1980995	NA	Netherlands	2022-Jan-27	EPI_ISL_9616265	A/red fox/Netherlands/22001901-005/2022	Wageningen Bioveterinary Research	Wageningen Bioveterinary Research	Beerens, Nancy; Harders, Frank; Pritz-Verschuren, Sylvia; Roose, Marit; Venema, Sandra; Germeraad, Evelien; Engelsma, Marc; Heutink, Rene
EPI1956639	NA	Netherlands	2022-Jan-03	EPI_ISL_8650947	A/red fox/Netherlands/22000097-004/2022	Wageningen Bioveterinary Research	Wageningen Bioveterinary Research	Beerens, Nancy; Harders, Frank; Pritz-Verschuren, Sylvia; Roose, Marit; Venema, Sandra; Germeraad, Evelien; Engelsma, Marc; Heutink, Rene
EPI1859955	NA	Netherlands	2021-May-17	EPI_ISL_2194219	A/red fox/Netherlands/21028774-004/2021	Wageningen Bioveterinary Research	Wageningen Bioveterinary Research	Beerens, Nancy; Harders, Frank; Pritz-Verschuren, Sylvia; Roose, Marit; Germeraad, Evelien; Engelsma, Marc; Bossers, Alex; Heutink, Rene
EPI2697594	NA	Finland	2023-Jul-17	EPI_ISL_18123722	A/arctic-fox/Finland/564/2023	Finnish Food Authority	Finnish Institute for Health and Welfare, THL	Tuija Kantala, Alice Fusaro, Tuija Gadd, Monica Gallo, Niina Ikonen, Lauri Kareinen, Ari Kauppinen, Niina Tammiranta, Erika Lindh
EPI2468406	NA	Belgium	2023-Mar-02	EPI_ISL_17245141	A/Vulpes_vulpes/Belgium/01924_0003/2023	Sciensano - Animal Infectious Diseases	Sciensano, Department of Animal Infectious Diseases	Van Borm, Steven; Roupie, Virginie; Hostyn, Pierre; Mathijs, Elisabeth; Lambrecht, Benedicte; Steensels, Mieke
EPI2468398	NA	Belgium	2023-Feb-27	EPI_ISL_17245099	A/Vulpes_vulpes/Belgium/01784_0010/2023	Sciensano - Animal Infectious Diseases	Sciensano, Department of Animal Infectious Diseases	Van Borm, Steven; Roupie, Virginie; Hostyn, Pierre; Mathijs, Elisabeth; Lambrecht, Benedicte; Steensels, Mieke
EPI2468382	NA	Belgium	2023-Feb-27	EPI_ISL_17244973	A/Vulpes_vulpes/Belgium/01784_0004/2023	Sciensano - Animal Infectious Diseases	Sciensano, Department of Animal Infectious Diseases	Van Borm, Steven; Roupie, Virginie; Hostyn, Pierre; Mathijs, Elisabeth; Lambrecht, Benedicte; Steensels, Mieke
EPI2856913	NA	Canada	2023-Aug-22	EPI_ISL_18665627	A/Red_Fox/BC/AIVPHL-1286/2023	B.C. Centre for Disease Control	Public Health Agency of Canada	Himsworth, Chelsea; Prystajecky,Natalie; Tyson,John; Jassem,Agatha; Kuchinski,Kevin; Coombe, Michelle; Lee,Tracy; Azana,Rob; Fung,Janet; Chan,Michael; Cheung,Branco; Caleta,Jessica; Tsang,Frankie; Yang,Kevin; Russell,Shannon; Zlosnik,James; Hoang,Linda
EPI2782181	NA	Norway	2022-Jul-26	EPI_ISL_18455203	A/Red_fox/Norway/2022-07-1768-2T/2022	Norwegian Veterinary Institute	Norwegian Veterinary Institute	Britt Gjerset, Cathrine Arnason B√∏e
EPI2677006	NA	United States	2022-May-27	EPI_ISL_18090482	A/red fox/Michigan/22-018712-003/2022	National Veterinary Services Laboratories - USDA	National Veterinary Services Laboratories - USDA	Chinh,Thanh;Franzen,Kerrie;Love,Emily;Ozella,Mikaela;Killian,Mary;Lantz,Kristina;Stuber,Tod;Hicks,Jessica;Norris,Cameron
EPI2540334	NA	Belgium	2023-Mar-29	EPI_ISL_17606758	A/Vulpes_vulpes/Belgium/03117_0004/2023	Sciensano - Animal Infectious Diseases	Sciensano, Department of Animal Infectious Diseases	Van Borm, Steven; Roupie, Virginie; Hostyn, Pierre; Mathijs, Elisabeth; Lambrecht, Benedicte; Steensels, Mieke
EPI2540326	NA	Belgium	2023-Mar-29	EPI_ISL_17606757	A/Vulpes_vulpes/Belgium/03117_0001/2023	Sciensano - Animal Infectious Diseases	Sciensano, Department of Animal Infectious Diseases	Van Borm, Steven; Roupie, Virginie; Hostyn, Pierre; Mathijs, Elisabeth; Lambrecht, Benedicte; Steensels, Mieke
EPI2540316	NA	Belgium	2023-Mar-14	EPI_ISL_17606756	A/Vulpes_vulpes/Belgium/02359_0006/2023	Sciensano - Animal Infectious Diseases	Sciensano, Department of Animal Infectious Diseases	Van Borm, Steven; Roupie, Virginie; Hostyn, Pierre; Mathijs, Elisabeth; Lambrecht, Benedicte; Steensels, Mieke
EPI2540308	NA	Belgium	2023-Mar-14	EPI_ISL_17606755	A/Vulpes_vulpes/Belgium/02359_0002/2023	Sciensano - Animal Infectious Diseases	Sciensano, Department of Animal Infectious Diseases	Van Borm, Steven; Roupie, Virginie; Hostyn, Pierre; Mathijs, Elisabeth; Lambrecht, Benedicte; Steensels, Mieke
EPI2513409	NA	Canada	2023-Jan-31	EPI_ISL_17494318	A/Red Fox/NL/FAV-0075/2023	Atlantic Veterinary College, University of Prince Edward Island	Canadian Food Inspection Agency	Parma, L; Hisanaga, T; Xu, W; Alkie, T; Jones, M; Yason, C; Lung, O; Berhane, Y
EPI2576159	NA	Denmark	2022-Apr-28	EPI_ISL_17447440	A/red fox/Denmark/08658-3.02-2/2022	Statens Serumm Institute	Statens Serum Institute	Hjulsager,Charlotte;Liang,Yuan
EPI2576151	NA	Denmark	2022-Apr-28	EPI_ISL_17447414	A/red fox/Denmark/08658-2.02-2/2022	Statens Serum Institute	Statens Serum Institute	Hjulsager,Charlotte; Liang,Yuan
EPI2576143	NA	Denmark	2022-Apr-28	EPI_ISL_17447413	A/red fox/Denmark/08658-1.01/2022	Statens Serumm Institute	Statens Serum Institute	Hjulsager,Charlotte; Liang,Yuan
EPI2576135	NA	Denmark	2022-Jan-17	EPI_ISL_17447412	A/red fox/Denmark/01679-1.01-2/2022	Statens Serum Institute	Statens Serum Institute	Hjulsager,Charlotte; Liang,Yuan
EPI2500051	NA	Canada	2022-May-19	EPI_ISL_17394088	A/Red Fox/PEI/FAV-0544-P1/2022	Atlantic Veterinary College, University of Prince Edward Island	Canadian Food Inspection Agency	Alkie, T; Yason, C; Jones, M; Xu, W; Hisanaga, T; Koziuk, T; Fisher, M; Lung, O; Berhane, Y
EPI2473767	NA	United States	2022-Jul-06	EPI_ISL_17260687	A/red fox/Michigan/22-021733-007/2022	National Veterinary Services Laboratories - USDA	National Veterinary Services Laboratories - USDA	Chinh,Thanh;Franzen,Kerrie;Love,Emily;Killian,Mary;Koster,Leo;Lantz,Kristina;Stuber,Tod;Hicks,Jessica;Norris,Cameron
EPI2473757	NA	United States	2022-Jul-06	EPI_ISL_17260686	A/red fox/Michigan/22-021733-005/2022	National Veterinary Services Laboratories - USDA	National Veterinary Services Laboratories - USDA	Chinh,Thanh;Franzen,Kerrie;Love,Emily;Killian,Mary;Koster,Leo;Lantz,Kristina;Stuber,Tod;Hicks,Jessica;Norris,Cameron
EPI2473738	NA	United States	2022-Jul-06	EPI_ISL_17260685	A/red fox/Michigan/22-021733-003/2022	National Veterinary Services Laboratories - USDA	National Veterinary Services Laboratories - USDA	Chinh,Thanh;Franzen,Kerrie;Love,Emily;Killian,Mary;Koster,Leo;Lantz,Kristina;Stuber,Tod;Hicks,Jessica;Norris,Cameron
EPI2473720	NA	United States	2022-Jul-06	EPI_ISL_17260684	A/red fox/Michigan/22-021733-002/2022	National Veterinary Services Laboratories - USDA	National Veterinary Services Laboratories - USDA	Chinh,Thanh;Franzen,Kerrie;Love,Emily;Killian,Mary;Koster,Leo;Lantz,Kristina;Stuber,Tod;Hicks,Jessica;Norris,Cameron
EPI2473673	NA	United States	2022-Jun-15	EPI_ISL_17260681	A/red fox/Alaska/22-019272-001/2022	National Veterinary Services Laboratories - USDA	National Veterinary Services Laboratories - USDA	Chinh,Thanh;Franzen,Kerrie;Love,Emily;Killian,Mary;Koster,Leo;Lantz,Kristina;Stuber,Tod;Hicks,Jessica;Norris,Cameron
EPI2473645	NA	United States	2022-May-27	EPI_ISL_17260679	A/red fox/Michigan/22-018712-005/2022	National Veterinary Services Laboratories - USDA	National Veterinary Services Laboratories - USDA	Chinh,Thanh;Franzen,Kerrie;Love,Emily;Killian,Mary;Koster,Leo;Lantz,Kristina;Stuber,Tod;Hicks,Jessica;Norris,Cameron
EPI2473631	NA	United States	2022-May-10	EPI_ISL_17260678	A/red fox/Michigan/22-017507-008/2022	National Veterinary Services Laboratories - USDA	National Veterinary Services Laboratories - USDA	Chinh,Thanh;Franzen,Kerrie;Love,Emily;Killian,Mary;Koster,Leo;Lantz,Kristina;Stuber,Tod;Hicks,Jessica;Norris,Cameron
EPI2473617	NA	United States	2022-May-05	EPI_ISL_17260677	A/red fox/Michigan/22-017507-007/2022	National Veterinary Services Laboratories - USDA	National Veterinary Services Laboratories - USDA	Chinh,Thanh;Franzen,Kerrie;Love,Emily;Killian,Mary;Koster,Leo;Lantz,Kristina;Stuber,Tod;Hicks,Jessica;Norris,Cameron
EPI2473603	NA	United States	2022-May-18	EPI_ISL_17260676	A/red fox/Michigan/22-017507-006/2022	National Veterinary Services Laboratories - USDA	National Veterinary Services Laboratories - USDA	Chinh,Thanh;Franzen,Kerrie;Love,Emily;Killian,Mary;Koster,Leo;Lantz,Kristina;Stuber,Tod;Hicks,Jessica;Norris,Cameron
EPI2473575	NA	United States	2022-May-23	EPI_ISL_17260674	A/red fox/North Dakota/22-017061-002/2022	National Veterinary Services Laboratories - USDA	National Veterinary Services Laboratories - USDA	Chinh,Thanh;Franzen,Kerrie;Love,Emily;Killian,Mary;Koster,Leo;Lantz,Kristina;Stuber,Tod;Hicks,Jessica;Norris,Cameron
EPI2473561	NA	United States	2022-May-23	EPI_ISL_17260673	A/red fox/North Dakota/22-017061-001/2022	National Veterinary Services Laboratories - USDA	National Veterinary Services Laboratories - USDA	Chinh,Thanh;Franzen,Kerrie;Love,Emily;Killian,Mary;Koster,Leo;Lantz,Kristina;Stuber,Tod;Hicks,Jessica;Norris,Cameron
EPI2473547	NA	United States	2022-Jan-01	EPI_ISL_17260672	A/red fox/Minnesota/22-017056-001/2022	National Veterinary Services Laboratories - USDA	National Veterinary Services Laboratories - USDA	Chinh,Thanh;Franzen,Kerrie;Love,Emily;Killian,Mary;Koster,Leo;Lantz,Kristina;Stuber,Tod;Hicks,Jessica;Norris,Cameron
EPI2473519	NA	United States	2022-May-24	EPI_ISL_17260670	A/fox/Utah/22-016402-001/2022	National Veterinary Services Laboratories - USDA	National Veterinary Services Laboratories - USDA	Chinh,Thanh;Franzen,Kerrie;Love,Emily;Killian,Mary;Koster,Leo;Lantz,Kristina;Stuber,Tod;Hicks,Jessica;Norris,Cameron
EPI2473505	NA	United States	2022-May-10	EPI_ISL_17260669	A/red fox/Alaska/22-016300-001/2022	National Veterinary Services Laboratories - USDA	National Veterinary Services Laboratories - USDA	Chinh,Thanh;Franzen,Kerrie;Love,Emily;Killian,Mary;Koster,Leo;Lantz,Kristina;Stuber,Tod;Hicks,Jessica;Norris,Cameron
EPI2473479	NA	United States	2022-May-06	EPI_ISL_17260667	A/fox/Wisconsin/22-014746-026/2022	National Veterinary Services Laboratories - USDA	National Veterinary Services Laboratories - USDA	Chinh,Thanh;Franzen,Kerrie;Love,Emily;Killian,Mary;Koster,Leo;Lantz,Kristina;Stuber,Tod;Hicks,Jessica;Norris,Cameron
EPI2473466	NA	United States	2022-May-06	EPI_ISL_17260666	A/fox/Wisconsin/22-014746-021/2022	National Veterinary Services Laboratories - USDA	National Veterinary Services Laboratories - USDA	Chinh,Thanh;Franzen,Kerrie;Love,Emily;Killian,Mary;Koster,Leo;Lantz,Kristina;Stuber,Tod;Hicks,Jessica;Norris,Cameron
EPI2473452	NA	United States	2022-May-03	EPI_ISL_17260665	A/fox/Wisconsin/22-014746-015/2022	National Veterinary Services Laboratories - USDA	National Veterinary Services Laboratories - USDA	Chinh,Thanh;Franzen,Kerrie;Love,Emily;Killian,Mary;Koster,Leo;Lantz,Kristina;Stuber,Tod;Hicks,Jessica;Norris,Cameron
EPI2473439	NA	United States	2022-Apr-19	EPI_ISL_17260664	A/fox/Wisconsin/22-014746-007/2022	National Veterinary Services Laboratories - USDA	National Veterinary Services Laboratories - USDA	Chinh,Thanh;Franzen,Kerrie;Love,Emily;Killian,Mary;Koster,Leo;Lantz,Kristina;Stuber,Tod;Hicks,Jessica;Norris,Cameron
EPI2473425	NA	United States	2022-May-09	EPI_ISL_17260663	A/red fox/Minnesota/22-014661-002/2022	National Veterinary Services Laboratories - USDA	National Veterinary Services Laboratories - USDA	Chinh,Thanh;Franzen,Kerrie;Love,Emily;Killian,Mary;Koster,Leo;Lantz,Kristina;Stuber,Tod;Hicks,Jessica;Norris,Cameron
EPI2473412	NA	United States	2022-May-01	EPI_ISL_17260662	A/fox/Wisconsin/22-013774-013/2022	National Veterinary Services Laboratories - USDA	National Veterinary Services Laboratories - USDA	Chinh,Thanh;Franzen,Kerrie;Love,Emily;Killian,Mary;Koster,Leo;Lantz,Kristina;Stuber,Tod;Hicks,Jessica;Norris,Cameron
EPI2473398	NA	United States	2022-May-01	EPI_ISL_17260661	A/fox/Wisconsin/22-013774-008/2022	National Veterinary Services Laboratories - USDA	National Veterinary Services Laboratories - USDA	Chinh,Thanh;Franzen,Kerrie;Love,Emily;Killian,Mary;Koster,Leo;Lantz,Kristina;Stuber,Tod;Hicks,Jessica;Norris,Cameron
EPI2437467	NA	United Kingdom	2022-Aug-23	EPI_ISL_17072388	A/fox/England/015850/2022	Animal and Plant Health Agency (APHA)	Animal and Plant Health Agency (APHA)
EPI2398418	NA	United Kingdom	2023-Jan-12	EPI_ISL_16904555	A/Red_Fox/Wales/017836/2023	Animal and Plant Health Agency (APHA)	Animal and Plant Health Agency (APHA)
EPI2274960	NA	Canada	2022-May-05	EPI_ISL_16367899	A/Red Fox/SK/FAV-0824-96/2022	Western College of Veterinary Medicine, University of Saskatchewan	Canadian Food Inspection Agency
EPI2259126	NA	United States	2022-Apr-27	EPI_ISL_16243273	A/fox/New York/22-015065-001/2022	National Veterinary Services Laboratories - USDA	National Veterinary Services Laboratories - USDA	Chinh,Thanh;Love, Emily;Franzen,Kerrie;Killian,Mary;Koster,Leo;Lantz,Kristina;Stuber,Tod;Hicks,Jessica
EPI2259118	NA	United States	2022-Apr-27	EPI_ISL_16243264	A/fox/New York/22-015064-001/2022	National Veterinary Services Laboratories - USDA	National Veterinary Services Laboratories - USDA	Chinh,Thanh;Love, Emily;Franzen,Kerrie;Killian,Mary;Koster,Leo;Lantz,Kristina;Stuber,Tod;Hicks,Jessica
EPI2259110	NA	United States	2022-Apr-15	EPI_ISL_16243253	A/fox/New York/22-015063-001/2022	National Veterinary Services Laboratories - USDA	National Veterinary Services Laboratories - USDA	Chinh,Thanh;Love, Emily;Franzen,Kerrie;Killian,Mary;Koster,Leo;Lantz,Kristina;Stuber,Tod;Hicks,Jessica
EPI2236535	NA	Canada	2022-Jun-28	EPI_ISL_16021854	A/Red Fox/NS/FAV-0879/2022	Atlantic Veterinary College, University of Prince Edward Island	Canadian Food Inspection Agency	Alkie, Tamiru; Yason, Carmencita; Jones, E.B. Megan; Bourque, Laura; Xu, Wanhong; Hisanaga, Tamiko; Suderman, Suderman; Koziuk, Janice; Kruczkiewicz, Peter; Nguyen, Hoang Hai; Fisher, Mathew; Lung, Oliver; Berhane, Yohannes
EPI2236511	NA	Canada	2022-May-24	EPI_ISL_16021587	A/Red Fox/PEI/FAV-0591-02/2022	Atlantic Veterinary College, University of Prince Edward Island	Canadian Food Inspection Agency	Alkie, Tamiru; Yason, Carmencita; Jones, E.B. Megan; Bourque, Laura; Xu, Wanhong; Hisanaga, Tamiko; Suderman, Suderman; Koziuk, Janice; Kruczkiewicz, Peter; Nguyen, Hoang Hai; Fisher, Mathew; Lung, Oliver; Berhane, Yohannes
EPI2236234	NA	Canada	2022-Apr-12	EPI_ISL_16014112	A/Red Fox/ON/FAV-0300-01/2022	Ontario Veterinary College, University of Guelph	Canadian Food Inspection Agency	Alkie, Tamiru; Cox, Sherri; Ojkic, Davor; Stevens, Brian; Xu, Wanhong; Hisanaga, Tamiko; Suderman, Suderman; Koziuk, Janice; Kruczkiewicz, Peter; Nguyen, Hoang Hai; Fisher, Mathew; Lung, Oliver; Berhane, Yohannes
EPI2236226	NA	Canada	2022-Apr-03	EPI_ISL_16013993	A/Red Fox/ON/FAV-0873/2022	Ontario Veterinary College, University of Guelph	Canadian Food Inspection Agency	Alkie, Tamiru; Cox, Sherri; Ojkic, Davor; Stevens, Brian; Xu, Wanhong; Hisanaga, Tamiko; Suderman, Suderman; Koziuk, Janice; Kruczkiewicz, Peter; Nguyen, Hoang Hai; Fisher, Mathew; Lung, Oliver; Berhane, Yohannes
EPI2236218	NA	Canada	2022-May-31	EPI_ISL_16013990	A/Red Fox/ON/FAV-0773-01/2022	Ontario Veterinary College, University of Guelph	Canadian Food Inspection Agency	Alkie, Tamiru; Cox, Sherri; Ojkic, Davor; Stevens, Brian; Xu, Wanhong; Hisanaga, Tamiko; Suderman, Suderman; Koziuk, Janice; Kruczkiewicz, Peter; Nguyen, Hoang Hai; Fisher, Mathew; Lung, Oliver; Berhane, Yohannes
EPI2236210	NA	Canada	2022-May-11	EPI_ISL_16013987	A/Red Fox/ON/FAV-0529-03/2022	Ontario Veterinary College, University of Guelph	Canadian Food Inspection Agency	Alkie, Tamiru; Cox, Sherri; Ojkic, Davor; Stevens, Brian; Xu, Wanhong; Hisanaga, Tamiko; Suderman, Suderman; Koziuk, Janice; Kruczkiewicz, Peter; Nguyen, Hoang Hai; Fisher, Mathew; Lung, Oliver; Berhane, Yohannes
EPI2236202	NA	Canada	2022-May-19	EPI_ISL_16013986	A/Red Fox/ON/FAV-0529-02/2022	Ontario Veterinary College, University of Guelph	Canadian Food Inspection Agency	Alkie, Tamiru; Cox, Sherri; Ojkic, Davor; Stevens, Brian; Xu, Wanhong; Hisanaga, Tamiko; Suderman, Suderman; Koziuk, Janice; Kruczkiewicz, Peter; Nguyen, Hoang Hai; Fisher, Mathew; Lung, Oliver; Berhane, Yohannes
EPI2235612	NA	Canada	2022-May-05	EPI_ISL_16003281	A/Red Fox/ON/FAV-0605-03/2022	Ontario Veterinary College, University of Guelph	Canadian Food Inspection Agency	Alkie, Tamiru; Cox, Sherri; Ojkic, Davor; Stevens, Brian; Xu, Wanhong; Hisanaga, Tamiko; Suderman, Suderman; Koziuk, Janice; Kruczkiewicz, Peter; Nguyen, Hoang Hai; Fisher, Mathew; Lung, Oliver; Berhane, Yohannes
EPI2235602	NA	Canada	2022-Apr-27	EPI_ISL_16003275	A/Red Fox/ON/FAV-0605-01/2022	Ontario Veterinary College, University of Guelph	Canadian Food Inspection Agency	Alkie, Tamiru; Cox, Sherri; Ojkic, Davor; Stevens, Brian; Xu, Wanhong; Hisanaga, Tamiko; Suderman, Suderman; Koziuk, Janice; Kruczkiewicz, Peter; Nguyen, Hoang Hai; Fisher, Mathew; Lung, Oliver; Berhane, Yohannes
EPI2235594	NA	Canada	2022-May-05	EPI_ISL_16003270	A/Red Fox/ON/FAV-0605-02/2022	Ontario Veterinary College, University of Guelph	Canadian Food Inspection Agency	Alkie, Tamiru; Cox, Sherri; Ojkic, Davor; Stevens, Brian; Xu, Wanhong; Hisanaga, Tamiko; Suderman, Suderman; Koziuk, Janice; Kruczkiewicz, Peter; Nguyen, Hoang Hai; Fisher, Mathew; Lung, Oliver; Berhane, Yohannes
EPI2235578	NA	Canada	2022-May-09	EPI_ISL_16003267	A/Red Fox/MB/FAV-0414-12/2022	Manitoba Agriculture	Canadian Food Inspection Agency	Alkie, Tamiru; Cox, Sherri; Pople, Neil; Xu, Wanhong; Hisanaga, Tamiko; Suderman, Suderman; Koziuk, Janice; Kruczkiewicz, Peter; Nguyen, Hoang Hai; Fisher, Mathew; Lung, Oliver; Berhane, Yohannes
EPI2235570	NA	Canada	2022-May-09	EPI_ISL_16003266	A/Red Fox/MB/FAV-414-08/2022	Manitoba Agriculture	Canadian Food Inspection Agency	Alkie, Tamiru; Cox, Sherri; Pople, Neil; Xu, Wanhong; Hisanaga, Tamiko; Suderman, Suderman; Koziuk, Janice; Kruczkiewicz, Peter; Nguyen, Hoang Hai; Fisher, Mathew; Lung, Oliver; Berhane, Yohannes
EPI2235554	NA	Canada	2022-Apr-07	EPI_ISL_16003253	A/Red Fox/MB/FAV-370-01/2022	Manitoba Agriculture	Canadian Food Inspection Agency	Alkie, Tamiru; Cox, Sherri; Pople, Neil; Xu, Wanhong; Hisanaga, Tamiko; Suderman, Suderman; Koziuk, Janice; Kruczkiewicz, Peter; Nguyen, Hoang Hai; Fisher, Mathew; Lung, Oliver; Berhane, Yohannes
EPI2182126	NA	United States	2022-Jun-08	EPI_ISL_15078253	A/red fox/Michigan/22-018712-001/2022	National Veterinary Services Laboratories - USDA	National Veterinary Services Laboratories - USDA	Chinh,Thanh;Love, Emily;Franzen,Kerrie;Killian,Mary;Koster,Leo;Lantz,Kristina;Stuber,Tod;Hicks,Jessica
EPI2182110	NA	United States	2022-Jun-03	EPI_ISL_15078251	A/red fox/North Dakota/22-017354-001/2022	National Veterinary Services Laboratories - USDA	National Veterinary Services Laboratories - USDA	Chinh,Thanh;Love, Emily;Franzen,Kerrie;Killian,Mary;Koster,Leo;Lantz,Kristina;Stuber,Tod;Hicks,Jessica
EPI2182094	NA	United States	2022-May-13	EPI_ISL_15078249	A/fox/Minnesota/22-016487-001/2022	National Veterinary Services Laboratories - USDA	National Veterinary Services Laboratories - USDA	Chinh,Thanh;Love, Emily;Franzen,Kerrie;Killian,Mary;Koster,Leo;Lantz,Kristina;Stuber,Tod;Hicks,Jessica
EPI2182078	NA	United States	2022-May-06	EPI_ISL_15078247	A/fox/Wisconsin/22-014746-030/2022	National Veterinary Services Laboratories - USDA	National Veterinary Services Laboratories - USDA	Chinh,Thanh;Love, Emily;Franzen,Kerrie;Killian,Mary;Koster,Leo;Lantz,Kristina;Stuber,Tod;Hicks,Jessica
EPI2182070	NA	United States	2022-May-03	EPI_ISL_15078246	A/fox/Wisconsin/22-014746-008/2022	National Veterinary Services Laboratories - USDA	National Veterinary Services Laboratories - USDA	Chinh,Thanh;Love, Emily;Franzen,Kerrie;Killian,Mary;Koster,Leo;Lantz,Kristina;Stuber,Tod;Hicks,Jessica
EPI2158631	NA	United Kingdom	2021-Dec-07	EPI_ISL_14864640	A/fox/England/M0025-12-21/2021	Animal and Plant Health Agency (APHA)	Animal and Plant Health Agency (APHA)
EPI2158615	NA	United Kingdom	2022-Mar-09	EPI_ISL_14864638	A/fox/England/M0083-03-22/2022	Animal and Plant Health Agency (APHA)	Animal and Plant Health Agency (APHA)
EPI2131401	NA	United States	2022-May-12	EPI_ISL_14553997	A/Vulpes vulpes/New_York/115912/2022	Cornell University	Cornell University	Diel, Diego G; Caserta, Leonardo Cardia; Cronk, Brittany D.
EPI2131385	NA	United States	2022-May-10	EPI_ISL_14553811	A/Vulpes vulpes/New_York/103994/2022	Cornell University	Cornell University
EPI2130814	NA	United States	2022-Apr-04	EPI_ISL_14533193	A/Vulpes vulpes/New_York/074441/2022	Cornell University	Cornell University	Diel,Diego G; Caserta,Leonardo Cardia; Cronk, Brittany D
EPI2129818	NA	Belgium	2022-Apr-16	EPI_ISL_14493899	A/Vulpes_vulpes/Belgium/8660_0016/2022	Sciensano - Animal Infectious Diseases	Sciensano, Department of Animal Infectious Diseases	Van Borm, Steven; Mathijs, Elisabeth; Roupie, Virginie; Vervaeke, Muriel; Lambrecht, Benedicte; Steensels, Mieke
EPI1945584	NA	Estonia	2021-Nov-08	EPI_ISL_7778880	A/Red_fox/Estonia/TA2126820_21VIR10433-13/2021	Estonian Veterinary and Food Laboratory	Istituto Zooprofilattico Sperimentale Delle Venezie	Nurmoja, I.; Vilem, A.; Juurik, T.; Zecchin, B.; Fusaro, A.; Schivo, A.; Salviato, A.; Palumbo, E.; Milani, A.; Giussani, E.; Pastori, A.; Monne, I.; Terregino, C.
EPI1859947	NA	Netherlands	2021-May-17	EPI_ISL_2194218	A/red fox/Netherlands/21028774-002/2021	Wageningen Bioveterinary Research	Wageningen Bioveterinary Research	Beerens, Nancy; Harders, Frank; Pritz-Verschuren, Sylvia; Roose, Marit; Germeraad, Evelien; Engelsma, Marc; Bossers, Alex; Heutink, Rene
EPI2914906	NA	Finland	2023-Aug-03	EPI_ISL_18764855	A/blue fox/Finland/UH-004-E1/2023	University of Helsinki, Department of Virology	Finnish Institute for Health and Welfare, THL	Altan, E ; Avelin, V; Lindh, E; Kakkola, L; Tammiranta, N; Nokireki, T; Gadd, T; Ikonen, N; Savolainen-Kopra, C; Sironen, T; √ñsterlund, P.
EPI2892570	NA	Finland	2023-Aug-01	EPI_ISL_18728100	A/arctic-fox/Finland/677/2023	Finnish Food Authority	Finnish Food Authority	Kauppinen, Ari; Kareinen, Lauri; Tammiranta, Niina; Kantala, Tuija; Fusaro, Alice; Giussani, Edoardo; Gadd, Tuija
EPI2794120	NA	Latvia	2023-May-25	EPI_ISL_18509071	A/fox/Latvia/34393_23VIR8835-1/2023	Institute of Food Safety, Animal Health and Environment "BIOR"	Istituto Zooprofilattico Sperimentale Delle Venezie	Krivko, L.; Pastori, A.; Zecchin, B.; Fusaro, A.; Schivo, A.; Salviato, A.; Palumbo, E.; Giussani, E.; Monne, I.; Terregino, C.
EPI2755725	NA	Finland	2023-Aug-21	EPI_ISL_18290490	A/arctic-fox/Finland/1909/2023	Finnish Food Authority	Finnish Food Authority	Kauppinen, Ari; Kareinen, Lauri; Tammiranta, Niina; Kantala, Tuija; Fusaro, Alice; Gadd, Tuija
EPI2755717	NA	Finland	2023-Aug-21	EPI_ISL_18290489	A/arctic-fox/Finland/1908/2023	Finnish Food Authority	Finnish Food Authority	Kauppinen, Ari; Kareinen, Lauri; Tammiranta, Niina; Kantala, Tuija; Fusaro, Alice; Gadd, Tuija
EPI2755689	NA	Finland	2023-Aug-10	EPI_ISL_18290484	A/fox/Finland/1361/2023	Finnish Food Authority	Finnish Food Authority	Kauppinen, Ari; Kareinen, Lauri; Tammiranta, Niina; Kantala, Tuija; Fusaro, Alice; Gadd, Tuija
EPI2755674	NA	Finland	2023-Aug-10	EPI_ISL_18290482	A/arctic-fox/Finland/966/2023	Finnish Food Authority	Finnish Food Authority	Kauppinen, Ari; Kareinen, Lauri; Tammiranta, Niina; Kantala, Tuija; Fusaro, Alice; Gadd, Tuija
EPI2755666	NA	Finland	2023-Aug-07	EPI_ISL_18290481	A/arctic-fox/Finland/738/2023	Finnish Food Authority	Finnish Food Authority	Kauppinen, Ari; Kareinen, Lauri; Tammiranta, Niina; Kantala, Tuija; Fusaro, Alice; Gadd, Tuija
EPI2755628	NA	Finland	2023-Aug-09	EPI_ISL_18290476	A/arctic-fox/Finland/1086/2023	Finnish Food Authority	Finnish Food Authority	Kauppinen, Ari; Kareinen, Lauri; Tammiranta, Niina; Kantala, Tuija; Fusaro, Alice; Gadd, Tuija
EPI2755614	NA	Finland	2023-Aug-08	EPI_ISL_18290474	A/arctic-fox/Finland/783/2023	Finnish Food Authority	Finnish Food Authority	Kauppinen, Ari; Kareinen, Lauri; Tammiranta, Niina; Kantala, Tuija; Fusaro, Alice; Gadd, Tuija
EPI2755606	NA	Finland	2023-Aug-07	EPI_ISL_18290473	A/arctic-fox/Finland/736/2023	Finnish Food Authority	Finnish Food Authority	Kauppinen, Ari; Kareinen, Lauri; Tammiranta, Niina; Kantala, Tuija; Fusaro, Alice; Gadd, Tuija
EPI2755590	NA	Finland	2023-Aug-01	EPI_ISL_18290471	A/arctic-fox/Finland/673/2023	Finnish Food Authority	Finnish Food Authority	Kauppinen, Ari; Kareinen, Lauri; Tammiranta, Niina; Kantala, Tuija; Fusaro, Alice; Gadd, Tuija
EPI2755582	NA	Finland	2023-Jul-18	EPI_ISL_18290470	A/arctic-fox/Finland/578/2023	Finnish Food Authority	Finnish Food Authority	Kauppinen, Ari; Kareinen, Lauri; Tammiranta, Niina; Kantala, Tuija; Fusaro, Alice; Gadd, Tuija
EPI2755574	NA	Finland	2023-Jul-14	EPI_ISL_18290469	A/arctic-fox/Finland/545/2023	Finnish Food Authority	Finnish Food Authority	Kauppinen, Ari; Kareinen, Lauri; Tammiranta, Niina; Kantala, Tuija; Fusaro, Alice; Gadd, Tuija
EPI2641478	NA	Finland	2023-Jul-10	EPI_ISL_18011223	A/arctic-fox/Finland/504_23VIR6803-7/2023	Finnish Food Authority	Istituto Zooprofilattico Sperimentale Delle Venezie	Kantala, T.;Kauppinen, A.;Kareinen, L.;Gadd, T.;Galiano, M.;Ikonen, N.;Lindh, E.;Ormelli, S.;Varotto, M.;Zecchin, B.;Pastori, A.;Fusaro, A.;Zamperin, G.;Monne, I.;Terregino, C
EPI2641470	NA	Finland	2023-Jul-10	EPI_ISL_18011222	A/arctic-fox/Finland/497_23VIR6803-5/2023	Finnish Food Authority	Istituto Zooprofilattico Sperimentale Delle Venezie	Kantala, T.;Kauppinen, A.;Kareinen, L.;Gadd, T.;Galiano, M.;Ikonen, N.;Lindh, E.;Ormelli, S.;Varotto, M.;Zecchin, B.;Pastori, A.;Fusaro, A.;Zamperin, G.;Monne, I.;Terregino, C
EPI2018067	NA	Netherlands	2022-Jan-26	EPI_ISL_12066188	A/Fox/Netherlands/EMC1/2022	Erasmus Medical Center	Erasmus Medical Center	R.A.M., Fouchier; S., Therwessen; O., Vuong; I., Chestakova; R., Sikkema; P., Lexmond; M., Pronk
EPI1995281	NA	Netherlands	2022-Feb-07	EPI_ISL_11019882	A/red fox/Netherlands/22002636-002/2022	Wageningen Bioveterinary Research	Wageningen Bioveterinary Research	Beerens, Nancy; Harders, Frank; Pritz-Verschuren, Sylvia; Roose, Marit; Venema, Sandra; Germeraad, Evelien; Engelsma, Marc; Heutink, Rene
EPI1995272	NA	Netherlands	2022-Jan-03	EPI_ISL_11019784	A/red fox/Netherlands/22000097-005/2022	Wageningen Bioveterinary Research	Wageningen Bioveterinary Research	Beerens, Nancy; Harders, Frank; Pritz-Verschuren, Sylvia; Roose, Marit; Venema, Sandra; Germeraad, Evelien; Engelsma, Marc; Heutink, Rene
EPI1988052	NA	Netherlands	2022-Feb-18	EPI_ISL_10454887	A/red fox/Netherlands/22003495-003/2022	Wageningen Bioveterinary Research	Wageningen Bioveterinary Research	Beerens, Nancy; Harders, Frank; Pritz-Verschuren, Sylvia; Roose, Marit; Venema, Sandra; Germeraad, Evelien; Engelsma, Marc; Heutink, Rene
EPI1987363	NA	Netherlands	2022-Feb-11	EPI_ISL_10255587	A/red fox/Netherlands/22002993-003 /2022	Wageningen Bioveterinary Research	Wageningen Bioveterinary Research	Beerens, Nancy; Harders, Frank; Pritz-Verschuren, Sylvia; Roose, Marit; Venema, Sandra; Germeraad, Evelien; Engelsma, Marc; Heutink, Rene
EPI1987355	NA	Netherlands	2022-Feb-11	EPI_ISL_10255581	A/red fox/Netherlands/22002992-003/2022	Wageningen Bioveterinary Research	Wageningen Bioveterinary Research	Beerens, Nancy; Harders, Frank; Pritz-Verschuren, Sylvia; Roose, Marit; Venema, Sandra; Germeraad, Evelien; Engelsma, Marc; Heutink, Rene
EPI1988019	NA	Netherlands	2021-Dec-03	EPI_ISL_7683138	A/red fox/Netherlands/21040099-007/2021	Wageningen Bioveterinary Research	Wageningen Bioveterinary Research	Beerens, Nancy; Harders, Frank; Pritz-Verschuren, Sylvia; Roose, Marit; Venema, Sandra; Germeraad, Evelien; Engelsma, Marc; Heutink, Rene
EPI1988011	NA	Netherlands	2021-Dec-03	EPI_ISL_7683137	A/red fox/Netherlands/21040099-006/2021	Wageningen Bioveterinary Research	Wageningen Bioveterinary Research	Beerens, Nancy; Harders, Frank; Pritz-Verschuren, Sylvia; Roose, Marit; Venema, Sandra; Germeraad, Evelien; Engelsma, Marc; Heutink, Rene
EPI1943564	NA	Netherlands	2021-Dec-03	EPI_ISL_7683118	A/red fox/Netherlands/21040099-001/2021	Wageningen Bioveterinary Research	Wageningen Bioveterinary Research	Beerens, Nancy; Harders, Frank; Pritz-Verschuren, Sylvia; Roose, Marit; Venema, Sandra; Germeraad, Evelien; Engelsma, Marc; Heutink, Rene
EPI3177560	NA	Germany	2023-Jun-12	EPI_ISL_19029378	A/Fox/Bavaria/i193/2023	Bayerisches Landesamt f√ºr Gesundheit und Lebensmittelsicherheit	Bayerisches Landesamt f√ºr Gesundheit und Lebensmittelsicherheit
EPI2730916	NA	United Kingdom	2023-Jul-26	EPI_ISL_18226744	A/red fox/Northern Ireland/22191/2023	AFBI - Agri-Food & Bioscience Institute	Agri-Food and Biosciences Institute (AFBINI)	Lagan, P.; Lemon, K.
EPI2730908	NA	United Kingdom	2023-Jul-26	EPI_ISL_18226743	A/red fox/Northern Ireland/22185/2023	AFBI - Agri-Food & Bioscience Institute	Agri-Food and Biosciences Institute (AFBINI)	Lagan, P.; Lemon, K.
EPI2697649	NA	Finland	2023-Jul-24	EPI_ISL_18123933	A/arctic-fox/Finland/613/2023	Finnish Food Authority	Finnish Institute for Health and Welfare, THL	Tuija Kantala, Alice Fusaro, Tuija Gadd, Monica Gallo, Niina Ikonen, Lauri Kareinen, Ari Kauppinen, Niina Tammiranta, Erika Lindh
EPI2608638	NA	Germany	2023-Mar-29	EPI_ISL_17880914	A/Red fox/Germany/51023-261/2023	Lower Saxony State Office for Consumer Protection and Food Safety	Lower Saxony State Office for Consumer Protection & Food Safety
EPI2608623	NA	Germany	2023-Feb-09	EPI_ISL_17880911	A/Red fox/Germany/51023-124/2023	Lower Saxony State Office for Consumer Protection and Food Safety	Lower Saxony State Office for Consumer Protection & Food Safety
EPI2608599	NA	Germany	2023-Jan-31	EPI_ISL_17880908	A/Red fox/Germany/51023-113/2023	Lower Saxony State Office for Consumer Protection and Food Safety	Lower Saxony State Office for Consumer Protection & Food Safety
EPI2608566	NA	Germany	2023-Jan-09	EPI_ISL_17880904	A/Red fox/Germany/51023-60/2023	Lower Saxony State Office for Consumer Protection and Food Safety	Lower Saxony State Office for Consumer Protection & Food Safety
EPI2297258	NA	Belgium	2022-Dec-08	EPI_ISL_16549380	A/Vulpes_vulpes/Belgium/14775-0001/2022	Sciensano - Animal Infectious Diseases	Sciensano, Department of Animal Infectious Diseases	Van Borm, Steven; Roupie, Virginie; Hostyn, Pierre; Lambrecht, Benedicte; Steensels, Mieke
EPI3073420	NA	Germany	2024-Jan-01	EPI_ISL_18937337	A/fox/Germany-BW/2024AI00417/2024	Friedrich-Loeffler-Institut	Friedrich-Loeffler-Institut
EPI2764344	NA	Belgium	2023-May-17	EPI_ISL_18347730	A/Vulpes_vulpes/Belgium/04757_0004/2023	Sciensano - Animal Infectious Diseases	Sciensano, Department of Animal Infectious Diseases	Van Borm, Steven; Roupie, Virginie; Hostyn, Pierre; Mathijs, Elisabeth; Lambrecht, Benedicte; Steensels, Mieke
EPI2607405	NA	Japan	2023-Feb-20	EPI_ISL_17857959	A/Ezo red fox/Hokkaido/3/2023	Graduate School of Veterinary Medicine, Hokkaido University	Graduate School of Veterinary Medicine, Hokkaido University	Yoshihiro, Sakoda; Norikazu, Isoda; Takahiro, Hiono; Yik Lim, Hew; Tatsuru, Morita
EPI2585319	NA	Belgium	2023-Apr-24	EPI_ISL_17774571	A/Vulpes_Vulpes/Belgium/04018_0005/2023	Sciensano - Animal Infectious Diseases	Sciensano, Department of Animal Infectious Diseases	Van Borm, Steven; Roupie, Virginie; Hostyn, Pierre; Mathijs, Elisabeth; Lambrecht, Benedicte; Steensels, Mieke
EPI2585310	NA	Belgium	2023-Apr-24	EPI_ISL_17774570	A/Vulpes_Vulpes/Belgium/04016_0001/2023	Sciensano - Animal Infectious Diseases	Sciensano, Department of Animal Infectious Diseases	Van Borm, Steven; Roupie, Virginie; Hostyn, Pierre; Mathijs, Elisabeth; Lambrecht, Benedicte; Steensels, Mieke
EPI2585302	NA	Belgium	2023-Apr-14	EPI_ISL_17774358	A/Vulpes_Vulpes/Belgium/03704_0001/2023	Sciensano - Animal Infectious Diseases	Sciensano, Department of Animal Infectious Diseases	Van Borm, Steven; Roupie, Virginie; Hostyn, Pierre; Mathijs, Elisabeth; Lambrecht, Benedicte; Steensels, Mieke
EPI2585294	NA	Belgium	2023-Apr-14	EPI_ISL_17774357	A/Vulpes_Vulpes/Belgium/03703_0007/2023	Sciensano - Animal Infectious Diseases	Sciensano, Department of Animal Infectious Diseases	Van Borm, Steven; Roupie, Virginie; Hostyn, Pierre; Mathijs, Elisabeth; Lambrecht, Benedicte; Steensels, Mieke
EPI2585287	NA	Belgium	2023-Apr-14	EPI_ISL_17774308	A/Vulpes_Vulpes/Belgium/03703_0003/2023	Sciensano - Animal Infectious Diseases	Sciensano, Department of Animal Infectious Diseases	Van Borm, Steven; Roupie, Virginie; Hostyn, Pierre; Mathijs, Elisabeth; Lambrecht, Benedicte; Steensels, Mieke
EPI2585277	NA	Belgium	2023-Apr-14	EPI_ISL_17774224	A/Vulpes_Vulpes/Belgium/03703_0001/2023	Sciensano - Animal Infectious Diseases	Sciensano, Department of Animal Infectious Diseases	Van Borm, Steven; Roupie, Virginie; Hostyn, Pierre; Mathijs, Elisabeth; Lambrecht, Benedicte; Steensels, Mieke
EPI2584341	NA	Japan	2023-Apr-12	EPI_ISL_17766057	A/Ezo red fox/Hokkaido/2/2023	Graduate School of Veterinary Medicine, Hokkaido University	Graduate School of Veterinary Medicine, Hokkaido University	Yoshihiro,Sakoda; Norikazu,Isoda; Takahiro,Hiono; Yik Lim,Hew; Tatsuru,Morita
EPI2540299	NA	Belgium	2023-Feb-10	EPI_ISL_17606263	A/Vulpes_vulpes/Belgium/01295_0002/2023	Sciensano - Animal Infectious Diseases	Sciensano, Department of Animal Infectious Diseases	Van Borm, Steven; Roupie, Virginie; Hostyn, Pierre; Mathijs, Elisabeth; Lambrecht, Benedicte; Steensels, Mieke
EPI2499740	NA	Canada	2022-Apr-15	EPI_ISL_17393093	A/Red Fox/ON/FAV-0301-05/2022	Ontario Veterinary College, University of Guelph	Canadian Food Inspection Agency	Alkie, T; Ojkic, D; Stevens, B; Xu, W; Hisanaga, T; Koziuk, T; Fisher, M; Lung, O; Berhane, Y
EPI2259581	NA	Canada	2022-Apr-15	EPI_ISL_16248229	A/Red fox/ON/FAV-0301-05/2022	Ontario Veterinary College, University of Guelph	Canadian Food Inspection Agency	Alkie, Tamiru; Cox, Sherri; Ojkic, Davor; Stevens, Brian; Xu, Wanhong; Hisanaga, Tamiko; Suderman, Suderman; Koziuk, Janice; Kruczkiewicz, Peter; Nguyen, Hoang Hai; Fisher, Mathew; Lung, Oliver; Berhane, Yohannes
EPI2259573	NA	Canada	2022-May-24	EPI_ISL_16244526	A/Red fox/PEI/FAV-0592-01/2022	Atlantic Veterinary College, University of Prince Edward Island	Canadian Food Inspection Agency	Alkie, Tamiru; Yason, Carmencita; Jones, Megan E. B.; Bourque, Laura; Xu, Wanhong; Hisanaga, Tamiko; Suderman, Suderman; Koziuk, Janice; Kruczkiewicz, Peter; Nguyen, Hoang Hai; Fisher, Mathew; Lung, Oliver; Berhane, Yohannes
EPI2259318	NA	United States	2022-May-11	EPI_ISL_16243970	A/fox/Iowa/22-015357-002/2022	National Veterinary Services Laboratories - USDA	National Veterinary Services Laboratories - USDA	Chinh,Thanh;Love, Emily;Franzen,Kerrie;Killian,Mary;Koster,Leo;Lantz,Kristina;Stuber,Tod;Hicks,Jessica
EPI2258918	NA	United States	2022-Apr-22	EPI_ISL_16240637	A/fox/Michigan/22-014536-008/2022	National Veterinary Services Laboratories - USDA	National Veterinary Services Laboratories - USDA	Chinh,Thanh;Love, Emily;Franzen,Kerrie;Killian,Mary;Koster,Leo;Lantz,Kristina;Stuber,Tod;Hicks,Jessica
EPI2258910	NA	United States	2022-Apr-22	EPI_ISL_16240636	A/fox/Michigan/22-014536-007/2022	National Veterinary Services Laboratories - USDA	National Veterinary Services Laboratories - USDA	Chinh,Thanh;Love, Emily;Franzen,Kerrie;Killian,Mary;Koster,Leo;Lantz,Kristina;Stuber,Tod;Hicks,Jessica
EPI2258902	NA	United States	2022-Apr-22	EPI_ISL_16240635	A/fox/Michigan/22-014536-002/2022	National Veterinary Services Laboratories - USDA	National Veterinary Services Laboratories - USDA	Chinh,Thanh;Love, Emily;Franzen,Kerrie;Killian,Mary;Koster,Leo;Lantz,Kristina;Stuber,Tod;Hicks,Jessica
EPI2258894	NA	United States	2022-Apr-22	EPI_ISL_16240634	A/fox/Michigan/22-014536-001/2022	National Veterinary Services Laboratories - USDA	National Veterinary Services Laboratories - USDA	Chinh,Thanh;Love, Emily;Franzen,Kerrie;Killian,Mary;Koster,Leo;Lantz,Kristina;Stuber,Tod;Hicks,Jessica
EPI2236680	NA	Canada	2022-Jun-10	EPI_ISL_16023371	A/Red Fox/AB/FAV-0835-13/2022	Alberta Agriculture and Forestry, Government of Alberta	Canadian Food Inspection Agency	Alkie, Tamiru; Hicks, Mark; Pybuse, Margo J; Xu, Wanhong; Hisanaga, Tamiko; Suderman, Suderman; Koziuk, Janice; Kruczkiewicz, Peter; Nguyen, Hoang Hai; Fisher, Mathew; Lung, Oliver; Berhane, Yohannes
EPI2236672	NA	Canada	2022-May-05	EPI_ISL_16023370	A/Red Fox/AB/FAV-0835-02/2022	Alberta Agriculture and Forestry, Government of Alberta	Canadian Food Inspection Agency	Alkie, Tamiru; Hicks, Mark; Pybuse, Margo J; Xu, Wanhong; Hisanaga, Tamiko; Suderman, Suderman; Koziuk, Janice; Kruczkiewicz, Peter; Nguyen, Hoang Hai; Fisher, Mathew; Lung, Oliver; Berhane, Yohannes
EPI2236555	NA	Canada	2022-May-05	EPI_ISL_16023345	A/Red Fox/AB/FAV-0835-01/2022	Alberta Agriculture and Forestry, Government of Alberta	Canadian Food Inspection Agency	Alkie, Tamiru; Hicks, Mark; Pybuse, Margo; Xu, Wanhong; Hisanaga, Tamiko; Suderman, Suderman; Koziuk, Janice; Kruczkiewicz, Peter; Nguyen, Hoang Hai; Fisher, Mathew; Lung, Oliver; Berhane, Yohannes
EPI2236497	NA	Canada	2022-May-24	EPI_ISL_16020774	A/Red Fox/PEI/FAV-0591-01/2022	Atlantic Veterinary College, University of Prince Edward Island	Canadian Food Inspection Agency	Alkie, Tamiru; Yason, Carmencita; Jones, E.B. Megan; Bourque, Laura; Xu, Wanhong; Hisanaga, Tamiko; Suderman, Suderman; Koziuk, Janice; Kruczkiewicz, Peter; Nguyen, Hoang Hai; Fisher, Mathew; Lung, Oliver; Berhane, Yohannes
EPI2236489	NA	Canada	2022-May-19	EPI_ISL_16020773	A/Red Fox/PEI/FAV-0544/2022	Atlantic Veterinary College, University of Prince Edward Island	Canadian Food Inspection Agency	Alkie, Tamiru; Yason, Carmencita; Jones, E.B. Megan; Bourque, Laura; Xu, Wanhong; Hisanaga, Tamiko; Suderman, Suderman; Koziuk, Janice; Kruczkiewicz, Peter; Nguyen, Hoang Hai; Fisher, Mathew; Lung, Oliver; Berhane, Yohannes
EPI2236481	NA	Canada	2022-May-24	EPI_ISL_16020772	A/Red Fox/PEI/FAV-0592-02/2022	Atlantic Veterinary College, University of Prince Edward Island	Canadian Food Inspection Agency	Alkie, Tamiru; Yason, Carmencita; Jones, E.B. Megan; Bourque, Laura; Xu, Wanhong; Hisanaga, Tamiko; Suderman, Suderman; Koziuk, Janice; Kruczkiewicz, Peter; Nguyen, Hoang Hai; Fisher, Mathew; Lung, Oliver; Berhane, Yohannes
EPI2236770	NA	Canada	2022-Apr-22	EPI_ISL_16014529	A/Red Fox/ON/FAV-0558-02/2022	Ontario Veterinary College, University of Guelph	Canadian Food Inspection Agency	Alkie, Tamiru; Cox, Sherri; Ojkic, Davor; Stevens, Brian; Xu, Wanhong; Hisanaga, Tamiko; Suderman, Suderman; Koziuk, Janice; Kruczkiewicz, Peter; Nguyen, Hoang Hai; Fisher, Mathew; Lung, Oliver; Berhane, Yohannes
EPI2236294	NA	Canada	2022-Apr-22	EPI_ISL_16014527	A/Red Fox/ON/FAV-0558-01/2022	Ontario Veterinary College, University of Guelph	Canadian Food Inspection Agency	Alkie, Tamiru; Cox, Sherri; Ojkic, Davor; Stevens, Brian; Xu, Wanhong; Hisanaga, Tamiko; Suderman, Suderman; Koziuk, Janice; Kruczkiewicz, Peter; Nguyen, Hoang Hai; Fisher, Mathew; Lung, Oliver; Berhane, Yohannes
EPI2236258	NA	Canada	2022-Apr-16	EPI_ISL_16014448	A/Red Fox/ON/FAV-0531/2022	Ontario Veterinary College, University of Guelph	Canadian Food Inspection Agency	Alkie, Tamiru; Cox, Sherri; Ojkic, Davor; Stevens, Brian; Xu, Wanhong; Hisanaga, Tamiko; Suderman, Suderman; Koziuk, Janice; Kruczkiewicz, Peter; Nguyen, Hoang Hai; Fisher, Mathew; Lung, Oliver; Berhane, Yohannes
EPI2236250	NA	Canada	2022-Apr-13	EPI_ISL_16014445	A/Red Fox/ON/FAV-0300-06/2022	Ontario Veterinary College, University of Guelph	Canadian Food Inspection Agency	Alkie, Tamiru; Cox, Sherri; Ojkic, Davor; Stevens, Brian; Xu, Wanhong; Hisanaga, Tamiko; Suderman, Suderman; Koziuk, Janice; Kruczkiewicz, Peter; Nguyen, Hoang Hai; Fisher, Mathew; Lung, Oliver; Berhane, Yohannes
EPI2236242	NA	Canada	2022-Apr-22	EPI_ISL_16014368	A/Red Fox/ON/FAV-0300-05/2022	Ontario Veterinary College, University of Guelph	Canadian Food Inspection Agency	Alkie, Tamiru; Cox, Sherri; Ojkic, Davor; Stevens, Brian; Xu, Wanhong; Hisanaga, Tamiko; Suderman, Suderman; Koziuk, Janice; Kruczkiewicz, Peter; Nguyen, Hoang Hai; Fisher, Mathew; Lung, Oliver; Berhane, Yohannes
EPI2129834	NA	Belgium	2022-Jun-16	EPI_ISL_14494796	A/Vulpes_vulpes/Belgium/9031_0008/2022	Sciensano - Animal Infectious Diseases	Sciensano, Department of Animal Infectious Diseases	Van Borm, Steven; Mathijs, Elisabeth; Roupie, Virginie; Vervaeke, Muriel; Lambrecht, Benedicte; Steensels, Mieke
EPI2053952	NA	United States	2022-May-06	EPI_ISL_13052728	A/fox/Wisconsin/22-014746-029/2022	National Veterinary Services Laboratories - USDA	National Veterinary Services Laboratories - USDA	Chinh,Thanh;Franzen,Kerrie;Love, Emily;Killian,Mary;Koster,Leo;Lantz,Kristina;Stuber,Tod;Hicks,Jessica
EPI2053944	NA	United States	2022-May-06	EPI_ISL_13052727	A/fox/Wisconsin/22-014746-023/2022	National Veterinary Services Laboratories - USDA	National Veterinary Services Laboratories - USDA	Chinh,Thanh;Franzen,Kerrie;Love, Emily;Killian,Mary;Koster,Leo;Lantz,Kristina;Stuber,Tod;Hicks,Jessica
EPI2053936	NA	United States	2022-May-03	EPI_ISL_13052726	A/fox/Wisconsin/22-014746-016/2022	National Veterinary Services Laboratories - USDA	National Veterinary Services Laboratories - USDA	Chinh,Thanh;Franzen,Kerrie;Love, Emily;Killian,Mary;Koster,Leo;Lantz,Kristina;Stuber,Tod;Hicks,Jessica
EPI2053928	NA	United States	2022-May-03	EPI_ISL_13052725	A/fox/Wisconsin/22-014746-010/2022	National Veterinary Services Laboratories - USDA	National Veterinary Services Laboratories - USDA	Chinh,Thanh;Franzen,Kerrie;Love, Emily;Killian,Mary;Koster,Leo;Lantz,Kristina;Stuber,Tod;Hicks,Jessica
EPI2053920	NA	United States	2022-May-09	EPI_ISL_13052724	A/fox/Minnesota/22-014661-001/2022	National Veterinary Services Laboratories - USDA	National Veterinary Services Laboratories - USDA	Chinh,Thanh;Franzen,Kerrie;Love, Emily;Killian,Mary;Koster,Leo;Lantz,Kristina;Stuber,Tod;Hicks,Jessica
EPI2053912	NA	United States	2022-May-10	EPI_ISL_13052723	A/fox/Minnesota/22-014660-002/2022	National Veterinary Services Laboratories - USDA	National Veterinary Services Laboratories - USDA	Chinh,Thanh;Franzen,Kerrie;Love, Emily;Killian,Mary;Koster,Leo;Lantz,Kristina;Stuber,Tod;Hicks,Jessica
EPI2053904	NA	United States	2022-May-10	EPI_ISL_13052722	A/fox/Minnesota/22-014660-001/2022	National Veterinary Services Laboratories - USDA	National Veterinary Services Laboratories - USDA	Chinh,Thanh;Franzen,Kerrie;Love, Emily;Killian,Mary;Koster,Leo;Lantz,Kristina;Stuber,Tod;Hicks,Jessica
EPI2053896	NA	United States	2022-May-06	EPI_ISL_13052721	A/fox/Iowa/22-014421-001/2022	National Veterinary Services Laboratories - USDA	National Veterinary Services Laboratories - USDA	Chinh,Thanh;Franzen,Kerrie;Love, Emily;Killian,Mary;Koster,Leo;Lantz,Kristina;Stuber,Tod;Hicks,Jessica
EPI2053888	NA	United States	2022-Apr-22	EPI_ISL_13052720	A/fox/Minnesota/22-014182-001/2022	National Veterinary Services Laboratories - USDA	National Veterinary Services Laboratories - USDA	Chinh,Thanh;Franzen,Kerrie;Love, Emily;Killian,Mary;Koster,Leo;Lantz,Kristina;Stuber,Tod;Hicks,Jessica
EPI2053880	NA	United States	2022-May-01	EPI_ISL_13052719	A/fox/Wisconsin/22-013774-014/2022	National Veterinary Services Laboratories - USDA	National Veterinary Services Laboratories - USDA	Chinh,Thanh;Franzen,Kerrie;Love, Emily;Killian,Mary;Koster,Leo;Lantz,Kristina;Stuber,Tod;Hicks,Jessica
EPI2053872	NA	United States	2022-May-01	EPI_ISL_13052718	A/fox/Wisconsin/22-013774-009/2022	National Veterinary Services Laboratories - USDA	National Veterinary Services Laboratories - USDA	Chinh,Thanh;Franzen,Kerrie;Love, Emily;Killian,Mary;Koster,Leo;Lantz,Kristina;Stuber,Tod;Hicks,Jessica
EPI2053864	NA	United States	2022-May-01	EPI_ISL_13052717	A/fox/Wisconsin/22-013774-002/2022	National Veterinary Services Laboratories - USDA	National Veterinary Services Laboratories - USDA	Chinh,Thanh;Franzen,Kerrie;Love, Emily;Killian,Mary;Koster,Leo;Lantz,Kristina;Stuber,Tod;Hicks,Jessica
EPI2021934	NA	Japan	2022-Mar-31	EPI_ISL_12174842	A/Ezo red fox/Hokkaido/1/2022	Graduate School of Veterinary Medicine, Hokkaido University	Graduate School of Veterinary Medicine, Hokkaido University	Yoshihiro, SAKODA; Takahiro, HIONO; Norikazu, ISODA
EPI1998137	NA	Ireland	2022-Feb-14	EPI_ISL_11259283	A/fox/Ireland/3866_22VIR2064-1/2022	Central Veterinary Research Laboratory	Istituto Zooprofilattico Sperimentale delle Venezie	Byrne, C.; Garcia, K.; Cuartero, L.G.; Barbierato, G.; Zecchin, B.; Fusaro, A.; Schivo, A.; Salviato, A.; Palumbo, E.; Giussani, E.; Monne, I.; Terregino, C.
EPI3217367	NP	Netherlands	2021-Dec-03	EPI_ISL_19057417	A/red fox/Netherlands/21040099-006_PB2K/2021	Wageningen Bioveterinary Research	Wageningen Bioveterinary Research	Beerens, Nancy; Harders, Frank; Pritz-Verschuren, Sylvia; Roose, Marit; Venema, Sandra; Germeraad, Evelien; Engelsma, Marc; Heutink, Rene
EPI3217359	NP	Netherlands	2021-Dec-03	EPI_ISL_19057416	A/red fox/Netherlands/21040099-006_PB2E/2021	Wageningen Bioveterinary Research	Wageningen Bioveterinary Research	Beerens, Nancy; Harders, Frank; Pritz-Verschuren, Sylvia; Roose, Marit; Venema, Sandra; Germeraad, Evelien; Engelsma, Marc; Heutink, Rene
EPI2837097	NP	Finland	2023-Aug-07	EPI_ISL_18618528	A/arctic-fox/Finland/752/2023	Finnish Food Authority	Finnish Food Authority	Kauppinen, Ari; Kareinen, Lauri; Tammiranta, Niina; Kantala, Tuija; Fusaro, Alice; Gadd, Tuija
EPI2837089	NP	Finland	2023-Aug-04	EPI_ISL_18618442	A/arctic-fox/Finland/682/2023	Finnish Food Authority	Finnish Food Authority	Kauppinen, Ari; Kareinen, Lauri; Tammiranta, Niina; Kantala, Tuija; Fusaro, Alice; Gadd, Tuija
EPI2760279	NP	Finland	2023-Jul-10	EPI_ISL_18321745	A/arctic-fox/Finland/HVVI_503_23_23VIR6803-6/2023	Finnish Food Authority	Istituto Zooprofilattico Sperimentale Delle Venezie	Gadd, T.; Tammiranta, N; Kantala, K.; Nokireki, T.; Pastori, A.; Zecchin, B.; Fusaro, A.; Schivo, A.; Salviato, A.; Palumbo, E.; Giussani, E.; Monne, I.; Terregino, C.
EPI2760271	NP	Finland	2023-Jul-06	EPI_ISL_18321744	A/arctic-fox/Finland/HVVI_491_23_23VIR6803-1/2023	Finnish Food Authority	Istituto Zooprofilattico Sperimentale Delle Venezie	Gadd, T.; Tammiranta, N; Kantala, K.; Nokireki, T.; Pastori, A.; Zecchin, B.; Fusaro, A.; Schivo, A.; Salviato, A.; Palumbo, E.; Giussani, E.; Monne, I.; Terregino, C.
EPI2760263	NP	Finland	2023-Jul-06	EPI_ISL_18321743	A/arctic-fox/Finland/HVVI_492_23_23VIR6803-2/2023	Finnish Food Authority	Istituto Zooprofilattico Sperimentale Delle Venezie	Gadd, T.; Tammiranta, N; Kantala, K.; Nokireki, T.; Pastori, A.; Zecchin, B.; Fusaro, A.; Schivo, A.; Salviato, A.; Palumbo, E.; Giussani, E.; Monne, I.; Terregino, C.
EPI2755523	NP	Finland	2023-Jul-10	EPI_ISL_18292967	A/arctic-fox/Finland/501/2023	Finnish Food Authority	Finnish Food Authority	Kauppinen, Ari; Kareinen, Lauri; Tammiranta, Niina; Kantala, Tuija; Fusaro, Alice; Gadd, Tuija
EPI2755495	NP	Finland	2023-Aug-04	EPI_ISL_18292963	A/arctic-fox/Finland/684/2023	Finnish Food Authority	Finnish Food Authority	Kauppinen, Ari; Kareinen, Lauri; Tammiranta, Niina; Kantala, Tuija; Fusaro, Alice; Giussani, Edoardo; Gadd, Tuija
EPI2755455	NP	Finland	2023-Aug-01	EPI_ISL_18292958	A/arctic-fox/Finland/675/2023	Finnish Food Authority	Finnish Food Authority	Kauppinen, Ari; Kareinen, Lauri; Tammiranta, Niina; Kantala, Tuija; Fusaro, Alice; Giussani, Edoardo; Gadd, Tuija
EPI2755431	NP	Finland	2023-Jul-31	EPI_ISL_18292955	A/arctic-fox/Finland/670/2023	Finnish Food Authority	Finnish Food Authority	Kauppinen, Ari; Kareinen, Lauri; Tammiranta, Niina; Kantala, Tuija; Fusaro, Alice; Galiano, Monica; Ikonen, Niina; Lindh, Erika; Gadd, Tuija
EPI2755423	NP	Finland	2023-Jul-31	EPI_ISL_18292954	A/arctic-fox/Finland/666/2023	Finnish Food Authority	Finnish Food Authority	Kauppinen, Ari; Kareinen, Lauri; Tammiranta, Niina; Kantala, Tuija; Fusaro, Alice; Galiano, Monica; Ikonen, Niina; Lindh, Erika; Gadd, Tuija
EPI2701776	NP	Finland	2023-Aug-04	EPI_ISL_18131280	A/blue fox/Finland/2023AI06876_071/2023	University of Helsinki, Department of Virology	Friedrich-Loeffler-Institut
EPI2701768	NP	Finland	2023-Aug-04	EPI_ISL_18131279	A/silver fox/Finland/2023AI06834_029/2023	University of Helsinki, Department of Virology	Friedrich-Loeffler-Institut
EPI2701760	NP	Finland	2023-Aug-03	EPI_ISL_18131278	A/silver fox/Finland/2023AI06838_033/2023	University of Helsinki, Department of Virology	Friedrich-Loeffler-Institut
EPI2701752	NP	Finland	2023-Aug-03	EPI_ISL_18131277	A/red fox/Finland/2023AI06879_074/2023	University of Helsinki, Department of Virology	Friedrich-Loeffler-Institut
EPI2701744	NP	Finland	2023-Aug-03	EPI_ISL_18131276	A/blue fox/Finland/2023AI06820_015/2023	University of Helsinki, Department of Virology	Friedrich-Loeffler-Institut
EPI2235561	NP	Canada	2022-May-09	EPI_ISL_16003265	A/Red Fox/MB/FAV-414-004/2022	Manitoba Agriculture	Canadian Food Inspection Agency	Alkie, Tamiru; Cox, Sherri; Pople, Neil; Xu, Wanhong; Hisanaga, Tamiko; Suderman, Suderman; Koziuk, Janice; Kruczkiewicz, Peter; Nguyen, Hoang Hai; Fisher, Mathew; Lung, Oliver; Berhane, Yohannes
EPI2197233	NP	Finland	2021-Nov-01	EPI_ISL_15518271	A/red_fox/Finland/2891_21RS3535-1/2021	Finnish Food Authority	Istituto Zooprofilattico Sperimentale Delle Venezie	Tammiranta, N.;Kantala, T.;Laamanen, I.;Gadd, T.;Zecchin, B.;Fusaro, A.;Schivo, A.;Salviato, A.;Palumbo, E.;Milani, A.;Giussani, E.;Pastori, A.;Monne, I.;Terregino, C.
EPI2131351	NP	United States	2022-Apr-25	EPI_ISL_14551957	A/Vulpes vulpes/New_York/088592/2022	Cornell University	Cornell University	Diel, Diego G; Caserta, Leonardo Cardia; Cronk, Brittany D.
EPI2018076	NP	Netherlands	2022-Jan-22	EPI_ISL_12069289	A/Fox/Netherlands/EMC3/2022	Erasmus Medical Center	Erasmus Medical Center	R.A.M., Fouchier; S., Thewessen; O., Vuong; I., Chestakova; R., Sikkema; P., Lexmond; M., Pronk
EPI2018068	NP	Netherlands	2022-Jan-10	EPI_ISL_12069288	A/Fox/Netherlands/EMC2/2022	Erasmus Medical Center	Erasmus Medical Center	R.A.M., Fouchier; S., Thewessen; O., Vuong; I., Chestakova; R., Sikkema; P., Lexmond; M., Pronk
EPI1994439	NP	Netherlands	2022-Mar-01	EPI_ISL_10915976	A/red fox/Netherlands/22004172-003/2022	Wageningen Bioveterinary Research	Wageningen Bioveterinary Research	Beerens, Nancy; Harders, Frank; Pritz-Verschuren, Sylvia; Roose, Marit; Venema, Sandra; Germeraad, Evelien; Engelsma, Marc; Heutink, Rene
EPI1987219	NP	Netherlands	2022-Feb-08	EPI_ISL_10220428	A/red fox/Netherlands/22002722-004/2022	Wageningen Bioveterinary Research	Wageningen Bioveterinary Research	Beerens, Nancy; Harders, Frank; Pritz-Verschuren, Sylvia; Roose, Marit; Venema, Sandra; Germeraad, Evelien; Engelsma, Marc; Heutink, Rene
EPI1987211	NP	Netherlands	2022-Feb-07	EPI_ISL_10220427	A/red fox/Netherlands/22002636-005/2022	Wageningen Bioveterinary Research	Wageningen Bioveterinary Research	Beerens, Nancy; Harders, Frank; Pritz-Verschuren, Sylvia; Roose, Marit; Venema, Sandra; Germeraad, Evelien; Engelsma, Marc; Heutink, Rene
EPI1981013	NP	Netherlands	2022-Jan-31	EPI_ISL_9616272	A/red fox/Netherlands/22002191-003/2022	Wageningen Bioveterinary Research	Wageningen Bioveterinary Research	Beerens, Nancy; Harders, Frank; Pritz-Verschuren, Sylvia; Roose, Marit; Venema, Sandra; Germeraad, Evelien; Engelsma, Marc; Heutink, Rene
EPI1981005	NP	Netherlands	2022-Jan-31	EPI_ISL_9616271	A/red fox/Netherlands/22002190-003/2022	Wageningen Bioveterinary Research	Wageningen Bioveterinary Research	Beerens, Nancy; Harders, Frank; Pritz-Verschuren, Sylvia; Roose, Marit; Venema, Sandra; Germeraad, Evelien; Engelsma, Marc; Heutink, Rene
EPI1980989	NP	Netherlands	2022-Jan-27	EPI_ISL_9616265	A/red fox/Netherlands/22001901-005/2022	Wageningen Bioveterinary Research	Wageningen Bioveterinary Research	Beerens, Nancy; Harders, Frank; Pritz-Verschuren, Sylvia; Roose, Marit; Venema, Sandra; Germeraad, Evelien; Engelsma, Marc; Heutink, Rene
EPI1956633	NP	Netherlands	2022-Jan-03	EPI_ISL_8650947	A/red fox/Netherlands/22000097-004/2022	Wageningen Bioveterinary Research	Wageningen Bioveterinary Research	Beerens, Nancy; Harders, Frank; Pritz-Verschuren, Sylvia; Roose, Marit; Venema, Sandra; Germeraad, Evelien; Engelsma, Marc; Heutink, Rene
EPI1859954	NP	Netherlands	2021-May-17	EPI_ISL_2194219	A/red fox/Netherlands/21028774-004/2021	Wageningen Bioveterinary Research	Wageningen Bioveterinary Research	Beerens, Nancy; Harders, Frank; Pritz-Verschuren, Sylvia; Roose, Marit; Germeraad, Evelien; Engelsma, Marc; Bossers, Alex; Heutink, Rene
EPI2697611	NP	Finland	2023-Jul-31	EPI_ISL_18123725	A/arctic-fox/Finland/660/2023	Finnish Food Authority	Finnish Institute for Health and Welfare, THL	Tuija Kantala, Alice Fusaro, Tuija Gadd, Monica Gallo, Niina Ikonen, Lauri Kareinen, Ari Kauppinen, Niina Tammiranta, Erika Lindh
EPI2697603	NP	Finland	2023-Jul-27	EPI_ISL_18123724	A/arctic-fox/Finland/654/2023	Finnish Food Authority	Finnish Institute for Health and Welfare, THL	Tuija Kantala, Alice Fusaro, Tuija Gadd, Monica Gallo, Niina Ikonen, Lauri Kareinen, Ari Kauppinen, Niina Tammiranta, Erika Lindh
EPI2697588	NP	Finland	2023-Jul-17	EPI_ISL_18123722	A/arctic-fox/Finland/564/2023	Finnish Food Authority	Finnish Institute for Health and Welfare, THL	Tuija Kantala, Alice Fusaro, Tuija Gadd, Monica Gallo, Niina Ikonen, Lauri Kareinen, Ari Kauppinen, Niina Tammiranta, Erika Lindh
EPI2468405	NP	Belgium	2023-Mar-02	EPI_ISL_17245141	A/Vulpes_vulpes/Belgium/01924_0003/2023	Sciensano - Animal Infectious Diseases	Sciensano, Department of Animal Infectious Diseases	Van Borm, Steven; Roupie, Virginie; Hostyn, Pierre; Mathijs, Elisabeth; Lambrecht, Benedicte; Steensels, Mieke
EPI2468397	NP	Belgium	2023-Feb-27	EPI_ISL_17245099	A/Vulpes_vulpes/Belgium/01784_0010/2023	Sciensano - Animal Infectious Diseases	Sciensano, Department of Animal Infectious Diseases	Van Borm, Steven; Roupie, Virginie; Hostyn, Pierre; Mathijs, Elisabeth; Lambrecht, Benedicte; Steensels, Mieke
EPI2468389	NP	Belgium	2023-Feb-27	EPI_ISL_17245098	A/Vulpes_vulpes/Belgium/01784_0008/2023	Sciensano - Animal Infectious Diseases	Sciensano, Department of Animal Infectious Diseases	Van Borm, Steven; Roupie, Virginie; Hostyn, Pierre; Mathijs, Elisabeth; Lambrecht, Benedicte; Steensels, Mieke
EPI2468381	NP	Belgium	2023-Feb-27	EPI_ISL_17244973	A/Vulpes_vulpes/Belgium/01784_0004/2023	Sciensano - Animal Infectious Diseases	Sciensano, Department of Animal Infectious Diseases	Van Borm, Steven; Roupie, Virginie; Hostyn, Pierre; Mathijs, Elisabeth; Lambrecht, Benedicte; Steensels, Mieke
EPI2856927	NP	Canada	2023-Aug-22	EPI_ISL_18665627	A/Red_Fox/BC/AIVPHL-1286/2023	B.C. Centre for Disease Control	Public Health Agency of Canada	Himsworth, Chelsea; Prystajecky,Natalie; Tyson,John; Jassem,Agatha; Kuchinski,Kevin; Coombe, Michelle; Lee,Tracy; Azana,Rob; Fung,Janet; Chan,Michael; Cheung,Branco; Caleta,Jessica; Tsang,Frankie; Yang,Kevin; Russell,Shannon; Zlosnik,James; Hoang,Linda
EPI2782180	NP	Norway	2022-Jul-26	EPI_ISL_18455203	A/Red_fox/Norway/2022-07-1768-2T/2022	Norwegian Veterinary Institute	Norwegian Veterinary Institute	Britt Gjerset, Cathrine Arnason B√∏e
EPI2677005	NP	United States	2022-May-27	EPI_ISL_18090482	A/red fox/Michigan/22-018712-003/2022	National Veterinary Services Laboratories - USDA	National Veterinary Services Laboratories - USDA	Chinh,Thanh;Franzen,Kerrie;Love,Emily;Ozella,Mikaela;Killian,Mary;Lantz,Kristina;Stuber,Tod;Hicks,Jessica;Norris,Cameron
EPI2540333	NP	Belgium	2023-Mar-29	EPI_ISL_17606758	A/Vulpes_vulpes/Belgium/03117_0004/2023	Sciensano - Animal Infectious Diseases	Sciensano, Department of Animal Infectious Diseases	Van Borm, Steven; Roupie, Virginie; Hostyn, Pierre; Mathijs, Elisabeth; Lambrecht, Benedicte; Steensels, Mieke
EPI2540324	NP	Belgium	2023-Mar-29	EPI_ISL_17606757	A/Vulpes_vulpes/Belgium/03117_0001/2023	Sciensano - Animal Infectious Diseases	Sciensano, Department of Animal Infectious Diseases	Van Borm, Steven; Roupie, Virginie; Hostyn, Pierre; Mathijs, Elisabeth; Lambrecht, Benedicte; Steensels, Mieke
EPI2540315	NP	Belgium	2023-Mar-14	EPI_ISL_17606756	A/Vulpes_vulpes/Belgium/02359_0006/2023	Sciensano - Animal Infectious Diseases	Sciensano, Department of Animal Infectious Diseases	Van Borm, Steven; Roupie, Virginie; Hostyn, Pierre; Mathijs, Elisabeth; Lambrecht, Benedicte; Steensels, Mieke
EPI2540307	NP	Belgium	2023-Mar-14	EPI_ISL_17606755	A/Vulpes_vulpes/Belgium/02359_0002/2023	Sciensano - Animal Infectious Diseases	Sciensano, Department of Animal Infectious Diseases	Van Borm, Steven; Roupie, Virginie; Hostyn, Pierre; Mathijs, Elisabeth; Lambrecht, Benedicte; Steensels, Mieke
EPI2513408	NP	Canada	2023-Jan-31	EPI_ISL_17494318	A/Red Fox/NL/FAV-0075/2023	Atlantic Veterinary College, University of Prince Edward Island	Canadian Food Inspection Agency	Parma, L; Hisanaga, T; Xu, W; Alkie, T; Jones, M; Yason, C; Lung, O; Berhane, Y
EPI2576158	NP	Denmark	2022-Apr-28	EPI_ISL_17447440	A/red fox/Denmark/08658-3.02-2/2022	Statens Serumm Institute	Statens Serum Institute	Hjulsager,Charlotte;Liang,Yuan
EPI2576150	NP	Denmark	2022-Apr-28	EPI_ISL_17447414	A/red fox/Denmark/08658-2.02-2/2022	Statens Serum Institute	Statens Serum Institute	Hjulsager,Charlotte; Liang,Yuan
EPI2576142	NP	Denmark	2022-Apr-28	EPI_ISL_17447413	A/red fox/Denmark/08658-1.01/2022	Statens Serumm Institute	Statens Serum Institute	Hjulsager,Charlotte; Liang,Yuan
EPI2576134	NP	Denmark	2022-Jan-17	EPI_ISL_17447412	A/red fox/Denmark/01679-1.01-2/2022	Statens Serum Institute	Statens Serum Institute	Hjulsager,Charlotte; Liang,Yuan
EPI2500050	NP	Canada	2022-May-19	EPI_ISL_17394088	A/Red Fox/PEI/FAV-0544-P1/2022	Atlantic Veterinary College, University of Prince Edward Island	Canadian Food Inspection Agency	Alkie, T; Yason, C; Jones, M; Xu, W; Hisanaga, T; Koziuk, T; Fisher, M; Lung, O; Berhane, Y
EPI2473761	NP	United States	2022-Jul-06	EPI_ISL_17260687	A/red fox/Michigan/22-021733-007/2022	National Veterinary Services Laboratories - USDA	National Veterinary Services Laboratories - USDA	Chinh,Thanh;Franzen,Kerrie;Love,Emily;Killian,Mary;Koster,Leo;Lantz,Kristina;Stuber,Tod;Hicks,Jessica;Norris,Cameron
EPI2473744	NP	United States	2022-Jul-06	EPI_ISL_17260686	A/red fox/Michigan/22-021733-005/2022	National Veterinary Services Laboratories - USDA	National Veterinary Services Laboratories - USDA	Chinh,Thanh;Franzen,Kerrie;Love,Emily;Killian,Mary;Koster,Leo;Lantz,Kristina;Stuber,Tod;Hicks,Jessica;Norris,Cameron
EPI2473726	NP	United States	2022-Jul-06	EPI_ISL_17260685	A/red fox/Michigan/22-021733-003/2022	National Veterinary Services Laboratories - USDA	National Veterinary Services Laboratories - USDA	Chinh,Thanh;Franzen,Kerrie;Love,Emily;Killian,Mary;Koster,Leo;Lantz,Kristina;Stuber,Tod;Hicks,Jessica;Norris,Cameron
EPI2473708	NP	United States	2022-Jul-06	EPI_ISL_17260684	A/red fox/Michigan/22-021733-002/2022	National Veterinary Services Laboratories - USDA	National Veterinary Services Laboratories - USDA	Chinh,Thanh;Franzen,Kerrie;Love,Emily;Killian,Mary;Koster,Leo;Lantz,Kristina;Stuber,Tod;Hicks,Jessica;Norris,Cameron
EPI2473663	NP	United States	2022-Jun-15	EPI_ISL_17260681	A/red fox/Alaska/22-019272-001/2022	National Veterinary Services Laboratories - USDA	National Veterinary Services Laboratories - USDA	Chinh,Thanh;Franzen,Kerrie;Love,Emily;Killian,Mary;Koster,Leo;Lantz,Kristina;Stuber,Tod;Hicks,Jessica;Norris,Cameron
EPI2473635	NP	United States	2022-May-27	EPI_ISL_17260679	A/red fox/Michigan/22-018712-005/2022	National Veterinary Services Laboratories - USDA	National Veterinary Services Laboratories - USDA	Chinh,Thanh;Franzen,Kerrie;Love,Emily;Killian,Mary;Koster,Leo;Lantz,Kristina;Stuber,Tod;Hicks,Jessica;Norris,Cameron
EPI2473621	NP	United States	2022-May-10	EPI_ISL_17260678	A/red fox/Michigan/22-017507-008/2022	National Veterinary Services Laboratories - USDA	National Veterinary Services Laboratories - USDA	Chinh,Thanh;Franzen,Kerrie;Love,Emily;Killian,Mary;Koster,Leo;Lantz,Kristina;Stuber,Tod;Hicks,Jessica;Norris,Cameron
EPI2473607	NP	United States	2022-May-05	EPI_ISL_17260677	A/red fox/Michigan/22-017507-007/2022	National Veterinary Services Laboratories - USDA	National Veterinary Services Laboratories - USDA	Chinh,Thanh;Franzen,Kerrie;Love,Emily;Killian,Mary;Koster,Leo;Lantz,Kristina;Stuber,Tod;Hicks,Jessica;Norris,Cameron
EPI2473593	NP	United States	2022-May-18	EPI_ISL_17260676	A/red fox/Michigan/22-017507-006/2022	National Veterinary Services Laboratories - USDA	National Veterinary Services Laboratories - USDA	Chinh,Thanh;Franzen,Kerrie;Love,Emily;Killian,Mary;Koster,Leo;Lantz,Kristina;Stuber,Tod;Hicks,Jessica;Norris,Cameron
EPI2473565	NP	United States	2022-May-23	EPI_ISL_17260674	A/red fox/North Dakota/22-017061-002/2022	National Veterinary Services Laboratories - USDA	National Veterinary Services Laboratories - USDA	Chinh,Thanh;Franzen,Kerrie;Love,Emily;Killian,Mary;Koster,Leo;Lantz,Kristina;Stuber,Tod;Hicks,Jessica;Norris,Cameron
EPI2473551	NP	United States	2022-May-23	EPI_ISL_17260673	A/red fox/North Dakota/22-017061-001/2022	National Veterinary Services Laboratories - USDA	National Veterinary Services Laboratories - USDA	Chinh,Thanh;Franzen,Kerrie;Love,Emily;Killian,Mary;Koster,Leo;Lantz,Kristina;Stuber,Tod;Hicks,Jessica;Norris,Cameron
EPI2473537	NP	United States	2022-Jan-01	EPI_ISL_17260672	A/red fox/Minnesota/22-017056-001/2022	National Veterinary Services Laboratories - USDA	National Veterinary Services Laboratories - USDA	Chinh,Thanh;Franzen,Kerrie;Love,Emily;Killian,Mary;Koster,Leo;Lantz,Kristina;Stuber,Tod;Hicks,Jessica;Norris,Cameron
EPI2473510	NP	United States	2022-May-24	EPI_ISL_17260670	A/fox/Utah/22-016402-001/2022	National Veterinary Services Laboratories - USDA	National Veterinary Services Laboratories - USDA	Chinh,Thanh;Franzen,Kerrie;Love,Emily;Killian,Mary;Koster,Leo;Lantz,Kristina;Stuber,Tod;Hicks,Jessica;Norris,Cameron
EPI2473496	NP	United States	2022-May-10	EPI_ISL_17260669	A/red fox/Alaska/22-016300-001/2022	National Veterinary Services Laboratories - USDA	National Veterinary Services Laboratories - USDA	Chinh,Thanh;Franzen,Kerrie;Love,Emily;Killian,Mary;Koster,Leo;Lantz,Kristina;Stuber,Tod;Hicks,Jessica;Norris,Cameron
EPI2473470	NP	United States	2022-May-06	EPI_ISL_17260667	A/fox/Wisconsin/22-014746-026/2022	National Veterinary Services Laboratories - USDA	National Veterinary Services Laboratories - USDA	Chinh,Thanh;Franzen,Kerrie;Love,Emily;Killian,Mary;Koster,Leo;Lantz,Kristina;Stuber,Tod;Hicks,Jessica;Norris,Cameron
EPI2473456	NP	United States	2022-May-06	EPI_ISL_17260666	A/fox/Wisconsin/22-014746-021/2022	National Veterinary Services Laboratories - USDA	National Veterinary Services Laboratories - USDA	Chinh,Thanh;Franzen,Kerrie;Love,Emily;Killian,Mary;Koster,Leo;Lantz,Kristina;Stuber,Tod;Hicks,Jessica;Norris,Cameron
EPI2473443	NP	United States	2022-May-03	EPI_ISL_17260665	A/fox/Wisconsin/22-014746-015/2022	National Veterinary Services Laboratories - USDA	National Veterinary Services Laboratories - USDA	Chinh,Thanh;Franzen,Kerrie;Love,Emily;Killian,Mary;Koster,Leo;Lantz,Kristina;Stuber,Tod;Hicks,Jessica;Norris,Cameron
EPI2473429	NP	United States	2022-Apr-19	EPI_ISL_17260664	A/fox/Wisconsin/22-014746-007/2022	National Veterinary Services Laboratories - USDA	National Veterinary Services Laboratories - USDA	Chinh,Thanh;Franzen,Kerrie;Love,Emily;Killian,Mary;Koster,Leo;Lantz,Kristina;Stuber,Tod;Hicks,Jessica;Norris,Cameron
EPI2473416	NP	United States	2022-May-09	EPI_ISL_17260663	A/red fox/Minnesota/22-014661-002/2022	National Veterinary Services Laboratories - USDA	National Veterinary Services Laboratories - USDA	Chinh,Thanh;Franzen,Kerrie;Love,Emily;Killian,Mary;Koster,Leo;Lantz,Kristina;Stuber,Tod;Hicks,Jessica;Norris,Cameron
EPI2473402	NP	United States	2022-May-01	EPI_ISL_17260662	A/fox/Wisconsin/22-013774-013/2022	National Veterinary Services Laboratories - USDA	National Veterinary Services Laboratories - USDA	Chinh,Thanh;Franzen,Kerrie;Love,Emily;Killian,Mary;Koster,Leo;Lantz,Kristina;Stuber,Tod;Hicks,Jessica;Norris,Cameron
EPI2473389	NP	United States	2022-May-01	EPI_ISL_17260661	A/fox/Wisconsin/22-013774-008/2022	National Veterinary Services Laboratories - USDA	National Veterinary Services Laboratories - USDA	Chinh,Thanh;Franzen,Kerrie;Love,Emily;Killian,Mary;Koster,Leo;Lantz,Kristina;Stuber,Tod;Hicks,Jessica;Norris,Cameron
EPI2437461	NP	United Kingdom	2022-Aug-23	EPI_ISL_17072388	A/fox/England/015850/2022	Animal and Plant Health Agency (APHA)	Animal and Plant Health Agency (APHA)
EPI2398412	NP	United Kingdom	2023-Jan-12	EPI_ISL_16904555	A/Red_Fox/Wales/017836/2023	Animal and Plant Health Agency (APHA)	Animal and Plant Health Agency (APHA)
EPI2274959	NP	Canada	2022-May-05	EPI_ISL_16367899	A/Red Fox/SK/FAV-0824-96/2022	Western College of Veterinary Medicine, University of Saskatchewan	Canadian Food Inspection Agency
EPI2259120	NP	United States	2022-Apr-27	EPI_ISL_16243273	A/fox/New York/22-015065-001/2022	National Veterinary Services Laboratories - USDA	National Veterinary Services Laboratories - USDA	Chinh,Thanh;Love, Emily;Franzen,Kerrie;Killian,Mary;Koster,Leo;Lantz,Kristina;Stuber,Tod;Hicks,Jessica
EPI2259112	NP	United States	2022-Apr-27	EPI_ISL_16243264	A/fox/New York/22-015064-001/2022	National Veterinary Services Laboratories - USDA	National Veterinary Services Laboratories - USDA	Chinh,Thanh;Love, Emily;Franzen,Kerrie;Killian,Mary;Koster,Leo;Lantz,Kristina;Stuber,Tod;Hicks,Jessica
EPI2259104	NP	United States	2022-Apr-15	EPI_ISL_16243253	A/fox/New York/22-015063-001/2022	National Veterinary Services Laboratories - USDA	National Veterinary Services Laboratories - USDA	Chinh,Thanh;Love, Emily;Franzen,Kerrie;Killian,Mary;Koster,Leo;Lantz,Kristina;Stuber,Tod;Hicks,Jessica
EPI2236546	NP	Canada	2022-May-19	EPI_ISL_16022233	A/Red Fox/SK/FAV-0548-03/2022	Western College of Veterinary Medicine, University of Saskatchewan	Canadian Food Inspection Agency	Alkie, Tamiru; Maria B, Araya; Xu, Wanhong; Hisanaga, Tamiko; Suderman, Suderman; Koziuk, Janice; Kruczkiewicz, Peter; Nguyen, Hoang Hai; Fisher, Mathew; Lung, Oliver; Berhane, Yohannes
EPI2236534	NP	Canada	2022-Jun-28	EPI_ISL_16021854	A/Red Fox/NS/FAV-0879/2022	Atlantic Veterinary College, University of Prince Edward Island	Canadian Food Inspection Agency	Alkie, Tamiru; Yason, Carmencita; Jones, E.B. Megan; Bourque, Laura; Xu, Wanhong; Hisanaga, Tamiko; Suderman, Suderman; Koziuk, Janice; Kruczkiewicz, Peter; Nguyen, Hoang Hai; Fisher, Mathew; Lung, Oliver; Berhane, Yohannes
EPI2236518	NP	Canada	2022-May-19	EPI_ISL_16021788	A/Red Fox/NS/FAV-0543/2022	Atlantic Veterinary College, University of Prince Edward Island	Canadian Food Inspection Agency	Alkie, Tamiru; Yason, Carmencita; Jones, E.B. Megan; Bourque, Laura; Xu, Wanhong; Hisanaga, Tamiko; Suderman, Suderman; Koziuk, Janice; Kruczkiewicz, Peter; Nguyen, Hoang Hai; Fisher, Mathew; Lung, Oliver; Berhane, Yohannes
EPI2236510	NP	Canada	2022-May-24	EPI_ISL_16021587	A/Red Fox/PEI/FAV-0591-02/2022	Atlantic Veterinary College, University of Prince Edward Island	Canadian Food Inspection Agency	Alkie, Tamiru; Yason, Carmencita; Jones, E.B. Megan; Bourque, Laura; Xu, Wanhong; Hisanaga, Tamiko; Suderman, Suderman; Koziuk, Janice; Kruczkiewicz, Peter; Nguyen, Hoang Hai; Fisher, Mathew; Lung, Oliver; Berhane, Yohannes
EPI2236233	NP	Canada	2022-Apr-12	EPI_ISL_16014112	A/Red Fox/ON/FAV-0300-01/2022	Ontario Veterinary College, University of Guelph	Canadian Food Inspection Agency	Alkie, Tamiru; Cox, Sherri; Ojkic, Davor; Stevens, Brian; Xu, Wanhong; Hisanaga, Tamiko; Suderman, Suderman; Koziuk, Janice; Kruczkiewicz, Peter; Nguyen, Hoang Hai; Fisher, Mathew; Lung, Oliver; Berhane, Yohannes
EPI2236225	NP	Canada	2022-Apr-03	EPI_ISL_16013993	A/Red Fox/ON/FAV-0873/2022	Ontario Veterinary College, University of Guelph	Canadian Food Inspection Agency	Alkie, Tamiru; Cox, Sherri; Ojkic, Davor; Stevens, Brian; Xu, Wanhong; Hisanaga, Tamiko; Suderman, Suderman; Koziuk, Janice; Kruczkiewicz, Peter; Nguyen, Hoang Hai; Fisher, Mathew; Lung, Oliver; Berhane, Yohannes
EPI2236217	NP	Canada	2022-May-31	EPI_ISL_16013990	A/Red Fox/ON/FAV-0773-01/2022	Ontario Veterinary College, University of Guelph	Canadian Food Inspection Agency	Alkie, Tamiru; Cox, Sherri; Ojkic, Davor; Stevens, Brian; Xu, Wanhong; Hisanaga, Tamiko; Suderman, Suderman; Koziuk, Janice; Kruczkiewicz, Peter; Nguyen, Hoang Hai; Fisher, Mathew; Lung, Oliver; Berhane, Yohannes
EPI2236209	NP	Canada	2022-May-11	EPI_ISL_16013987	A/Red Fox/ON/FAV-0529-03/2022	Ontario Veterinary College, University of Guelph	Canadian Food Inspection Agency	Alkie, Tamiru; Cox, Sherri; Ojkic, Davor; Stevens, Brian; Xu, Wanhong; Hisanaga, Tamiko; Suderman, Suderman; Koziuk, Janice; Kruczkiewicz, Peter; Nguyen, Hoang Hai; Fisher, Mathew; Lung, Oliver; Berhane, Yohannes
EPI2236201	NP	Canada	2022-May-19	EPI_ISL_16013986	A/Red Fox/ON/FAV-0529-02/2022	Ontario Veterinary College, University of Guelph	Canadian Food Inspection Agency	Alkie, Tamiru; Cox, Sherri; Ojkic, Davor; Stevens, Brian; Xu, Wanhong; Hisanaga, Tamiko; Suderman, Suderman; Koziuk, Janice; Kruczkiewicz, Peter; Nguyen, Hoang Hai; Fisher, Mathew; Lung, Oliver; Berhane, Yohannes
EPI2235611	NP	Canada	2022-May-05	EPI_ISL_16003281	A/Red Fox/ON/FAV-0605-03/2022	Ontario Veterinary College, University of Guelph	Canadian Food Inspection Agency	Alkie, Tamiru; Cox, Sherri; Ojkic, Davor; Stevens, Brian; Xu, Wanhong; Hisanaga, Tamiko; Suderman, Suderman; Koziuk, Janice; Kruczkiewicz, Peter; Nguyen, Hoang Hai; Fisher, Mathew; Lung, Oliver; Berhane, Yohannes
EPI2235601	NP	Canada	2022-Apr-27	EPI_ISL_16003275	A/Red Fox/ON/FAV-0605-01/2022	Ontario Veterinary College, University of Guelph	Canadian Food Inspection Agency	Alkie, Tamiru; Cox, Sherri; Ojkic, Davor; Stevens, Brian; Xu, Wanhong; Hisanaga, Tamiko; Suderman, Suderman; Koziuk, Janice; Kruczkiewicz, Peter; Nguyen, Hoang Hai; Fisher, Mathew; Lung, Oliver; Berhane, Yohannes
EPI2235593	NP	Canada	2022-May-05	EPI_ISL_16003270	A/Red Fox/ON/FAV-0605-02/2022	Ontario Veterinary College, University of Guelph	Canadian Food Inspection Agency	Alkie, Tamiru; Cox, Sherri; Ojkic, Davor; Stevens, Brian; Xu, Wanhong; Hisanaga, Tamiko; Suderman, Suderman; Koziuk, Janice; Kruczkiewicz, Peter; Nguyen, Hoang Hai; Fisher, Mathew; Lung, Oliver; Berhane, Yohannes
EPI2235577	NP	Canada	2022-May-09	EPI_ISL_16003267	A/Red Fox/MB/FAV-0414-12/2022	Manitoba Agriculture	Canadian Food Inspection Agency	Alkie, Tamiru; Cox, Sherri; Pople, Neil; Xu, Wanhong; Hisanaga, Tamiko; Suderman, Suderman; Koziuk, Janice; Kruczkiewicz, Peter; Nguyen, Hoang Hai; Fisher, Mathew; Lung, Oliver; Berhane, Yohannes
EPI2235569	NP	Canada	2022-May-09	EPI_ISL_16003266	A/Red Fox/MB/FAV-414-08/2022	Manitoba Agriculture	Canadian Food Inspection Agency	Alkie, Tamiru; Cox, Sherri; Pople, Neil; Xu, Wanhong; Hisanaga, Tamiko; Suderman, Suderman; Koziuk, Janice; Kruczkiewicz, Peter; Nguyen, Hoang Hai; Fisher, Mathew; Lung, Oliver; Berhane, Yohannes
EPI2235553	NP	Canada	2022-Apr-07	EPI_ISL_16003253	A/Red Fox/MB/FAV-370-01/2022	Manitoba Agriculture	Canadian Food Inspection Agency	Alkie, Tamiru; Cox, Sherri; Pople, Neil; Xu, Wanhong; Hisanaga, Tamiko; Suderman, Suderman; Koziuk, Janice; Kruczkiewicz, Peter; Nguyen, Hoang Hai; Fisher, Mathew; Lung, Oliver; Berhane, Yohannes
EPI2182120	NP	United States	2022-Jun-08	EPI_ISL_15078253	A/red fox/Michigan/22-018712-001/2022	National Veterinary Services Laboratories - USDA	National Veterinary Services Laboratories - USDA	Chinh,Thanh;Love, Emily;Franzen,Kerrie;Killian,Mary;Koster,Leo;Lantz,Kristina;Stuber,Tod;Hicks,Jessica
EPI2182104	NP	United States	2022-Jun-03	EPI_ISL_15078251	A/red fox/North Dakota/22-017354-001/2022	National Veterinary Services Laboratories - USDA	National Veterinary Services Laboratories - USDA	Chinh,Thanh;Love, Emily;Franzen,Kerrie;Killian,Mary;Koster,Leo;Lantz,Kristina;Stuber,Tod;Hicks,Jessica
EPI2182088	NP	United States	2022-May-13	EPI_ISL_15078249	A/fox/Minnesota/22-016487-001/2022	National Veterinary Services Laboratories - USDA	National Veterinary Services Laboratories - USDA	Chinh,Thanh;Love, Emily;Franzen,Kerrie;Killian,Mary;Koster,Leo;Lantz,Kristina;Stuber,Tod;Hicks,Jessica
EPI2182072	NP	United States	2022-May-06	EPI_ISL_15078247	A/fox/Wisconsin/22-014746-030/2022	National Veterinary Services Laboratories - USDA	National Veterinary Services Laboratories - USDA	Chinh,Thanh;Love, Emily;Franzen,Kerrie;Killian,Mary;Koster,Leo;Lantz,Kristina;Stuber,Tod;Hicks,Jessica
EPI2182064	NP	United States	2022-May-03	EPI_ISL_15078246	A/fox/Wisconsin/22-014746-008/2022	National Veterinary Services Laboratories - USDA	National Veterinary Services Laboratories - USDA	Chinh,Thanh;Love, Emily;Franzen,Kerrie;Killian,Mary;Koster,Leo;Lantz,Kristina;Stuber,Tod;Hicks,Jessica
EPI2182056	NP	United States	2022-Apr-22	EPI_ISL_15078245	A/fox/Michigan/22-014536-004/2022	National Veterinary Services Laboratories - USDA	National Veterinary Services Laboratories - USDA	Chinh,Thanh;Love, Emily;Franzen,Kerrie;Killian,Mary;Koster,Leo;Lantz,Kristina;Stuber,Tod;Hicks,Jessica
EPI2158625	NP	United Kingdom	2021-Dec-07	EPI_ISL_14864640	A/fox/England/M0025-12-21/2021	Animal and Plant Health Agency (APHA)	Animal and Plant Health Agency (APHA)
EPI2158609	NP	United Kingdom	2022-Mar-09	EPI_ISL_14864638	A/fox/England/M0083-03-22/2022	Animal and Plant Health Agency (APHA)	Animal and Plant Health Agency (APHA)
EPI2131402	NP	United States	2022-May-12	EPI_ISL_14553997	A/Vulpes vulpes/New_York/115912/2022	Cornell University	Cornell University	Diel, Diego G; Caserta, Leonardo Cardia; Cronk, Brittany D.
EPI2131382	NP	United States	2022-May-10	EPI_ISL_14553811	A/Vulpes vulpes/New_York/103994/2022	Cornell University	Cornell University
EPI2131378	NP	United States	2022-Apr-04	EPI_ISL_14553810	A/Vulpes vulpes/New_York/099488/2022	Cornell University	Cornell University	Diel, Diego G; Caserta, Leonardo Cardia; Cronk, Brittany D.
EPI2130816	NP	United States	2022-Apr-04	EPI_ISL_14533193	A/Vulpes vulpes/New_York/074441/2022	Cornell University	Cornell University	Diel,Diego G; Caserta,Leonardo Cardia; Cronk, Brittany D
EPI2129817	NP	Belgium	2022-Apr-16	EPI_ISL_14493899	A/Vulpes_vulpes/Belgium/8660_0016/2022	Sciensano - Animal Infectious Diseases	Sciensano, Department of Animal Infectious Diseases	Van Borm, Steven; Mathijs, Elisabeth; Roupie, Virginie; Vervaeke, Muriel; Lambrecht, Benedicte; Steensels, Mieke
EPI1945578	NP	Estonia	2021-Nov-08	EPI_ISL_7778880	A/Red_fox/Estonia/TA2126820_21VIR10433-13/2021	Estonian Veterinary and Food Laboratory	Istituto Zooprofilattico Sperimentale Delle Venezie	Nurmoja, I.; Vilem, A.; Juurik, T.; Zecchin, B.; Fusaro, A.; Schivo, A.; Salviato, A.; Palumbo, E.; Milani, A.; Giussani, E.; Pastori, A.; Monne, I.; Terregino, C.
EPI1859946	NP	Netherlands	2021-May-17	EPI_ISL_2194218	A/red fox/Netherlands/21028774-002/2021	Wageningen Bioveterinary Research	Wageningen Bioveterinary Research	Beerens, Nancy; Harders, Frank; Pritz-Verschuren, Sylvia; Roose, Marit; Germeraad, Evelien; Engelsma, Marc; Bossers, Alex; Heutink, Rene
EPI2914902	NP	Finland	2023-Aug-03	EPI_ISL_18764855	A/blue fox/Finland/UH-004-E1/2023	University of Helsinki, Department of Virology	Finnish Institute for Health and Welfare, THL	Altan, E ; Avelin, V; Lindh, E; Kakkola, L; Tammiranta, N; Nokireki, T; Gadd, T; Ikonen, N; Savolainen-Kopra, C; Sironen, T; √ñsterlund, P.
EPI2892569	NP	Finland	2023-Aug-01	EPI_ISL_18728100	A/arctic-fox/Finland/677/2023	Finnish Food Authority	Finnish Food Authority	Kauppinen, Ari; Kareinen, Lauri; Tammiranta, Niina; Kantala, Tuija; Fusaro, Alice; Giussani, Edoardo; Gadd, Tuija
EPI2794114	NP	Latvia	2023-May-25	EPI_ISL_18509071	A/fox/Latvia/34393_23VIR8835-1/2023	Institute of Food Safety, Animal Health and Environment "BIOR"	Istituto Zooprofilattico Sperimentale Delle Venezie	Krivko, L.; Pastori, A.; Zecchin, B.; Fusaro, A.; Schivo, A.; Salviato, A.; Palumbo, E.; Giussani, E.; Monne, I.; Terregino, C.
EPI2755719	NP	Finland	2023-Aug-21	EPI_ISL_18290490	A/arctic-fox/Finland/1909/2023	Finnish Food Authority	Finnish Food Authority	Kauppinen, Ari; Kareinen, Lauri; Tammiranta, Niina; Kantala, Tuija; Fusaro, Alice; Gadd, Tuija
EPI2755711	NP	Finland	2023-Aug-21	EPI_ISL_18290489	A/arctic-fox/Finland/1908/2023	Finnish Food Authority	Finnish Food Authority	Kauppinen, Ari; Kareinen, Lauri; Tammiranta, Niina; Kantala, Tuija; Fusaro, Alice; Gadd, Tuija
EPI2755683	NP	Finland	2023-Aug-10	EPI_ISL_18290484	A/fox/Finland/1361/2023	Finnish Food Authority	Finnish Food Authority	Kauppinen, Ari; Kareinen, Lauri; Tammiranta, Niina; Kantala, Tuija; Fusaro, Alice; Gadd, Tuija
EPI2755668	NP	Finland	2023-Aug-10	EPI_ISL_18290482	A/arctic-fox/Finland/966/2023	Finnish Food Authority	Finnish Food Authority	Kauppinen, Ari; Kareinen, Lauri; Tammiranta, Niina; Kantala, Tuija; Fusaro, Alice; Gadd, Tuija
EPI2755660	NP	Finland	2023-Aug-07	EPI_ISL_18290481	A/arctic-fox/Finland/738/2023	Finnish Food Authority	Finnish Food Authority	Kauppinen, Ari; Kareinen, Lauri; Tammiranta, Niina; Kantala, Tuija; Fusaro, Alice; Gadd, Tuija
EPI2755622	NP	Finland	2023-Aug-09	EPI_ISL_18290476	A/arctic-fox/Finland/1086/2023	Finnish Food Authority	Finnish Food Authority	Kauppinen, Ari; Kareinen, Lauri; Tammiranta, Niina; Kantala, Tuija; Fusaro, Alice; Gadd, Tuija
EPI2755608	NP	Finland	2023-Aug-08	EPI_ISL_18290474	A/arctic-fox/Finland/783/2023	Finnish Food Authority	Finnish Food Authority	Kauppinen, Ari; Kareinen, Lauri; Tammiranta, Niina; Kantala, Tuija; Fusaro, Alice; Gadd, Tuija
EPI2755600	NP	Finland	2023-Aug-07	EPI_ISL_18290473	A/arctic-fox/Finland/736/2023	Finnish Food Authority	Finnish Food Authority	Kauppinen, Ari; Kareinen, Lauri; Tammiranta, Niina; Kantala, Tuija; Fusaro, Alice; Gadd, Tuija
EPI2755592	NP	Finland	2023-Aug-01	EPI_ISL_18290472	A/arctic-fox/Finland/674/2023	Finnish Food Authority	Finnish Food Authority	Kauppinen, Ari; Kareinen, Lauri; Tammiranta, Niina; Kantala, Tuija; Fusaro, Alice; Gadd, Tuija
EPI2755584	NP	Finland	2023-Aug-01	EPI_ISL_18290471	A/arctic-fox/Finland/673/2023	Finnish Food Authority	Finnish Food Authority	Kauppinen, Ari; Kareinen, Lauri; Tammiranta, Niina; Kantala, Tuija; Fusaro, Alice; Gadd, Tuija
EPI2755576	NP	Finland	2023-Jul-18	EPI_ISL_18290470	A/arctic-fox/Finland/578/2023	Finnish Food Authority	Finnish Food Authority	Kauppinen, Ari; Kareinen, Lauri; Tammiranta, Niina; Kantala, Tuija; Fusaro, Alice; Gadd, Tuija
EPI2755568	NP	Finland	2023-Jul-14	EPI_ISL_18290469	A/arctic-fox/Finland/545/2023	Finnish Food Authority	Finnish Food Authority	Kauppinen, Ari; Kareinen, Lauri; Tammiranta, Niina; Kantala, Tuija; Fusaro, Alice; Gadd, Tuija
EPI2641472	NP	Finland	2023-Jul-10	EPI_ISL_18011223	A/arctic-fox/Finland/504_23VIR6803-7/2023	Finnish Food Authority	Istituto Zooprofilattico Sperimentale Delle Venezie	Kantala, T.;Kauppinen, A.;Kareinen, L.;Gadd, T.;Galiano, M.;Ikonen, N.;Lindh, E.;Ormelli, S.;Varotto, M.;Zecchin, B.;Pastori, A.;Fusaro, A.;Zamperin, G.;Monne, I.;Terregino, C
EPI2641464	NP	Finland	2023-Jul-10	EPI_ISL_18011222	A/arctic-fox/Finland/497_23VIR6803-5/2023	Finnish Food Authority	Istituto Zooprofilattico Sperimentale Delle Venezie	Kantala, T.;Kauppinen, A.;Kareinen, L.;Gadd, T.;Galiano, M.;Ikonen, N.;Lindh, E.;Ormelli, S.;Varotto, M.;Zecchin, B.;Pastori, A.;Fusaro, A.;Zamperin, G.;Monne, I.;Terregino, C
EPI2122953	NP	Netherlands	2022-Feb-15	EPI_ISL_14393126	A/Fox/Netherlands/EMC6/2022	Erasmus Medical Center	Erasmus Medical Center
EPI2122938	NP	Netherlands	2022-Apr-02	EPI_ISL_14393097	A/Fox/Netherlands/EMC4/2022	Erasmus Medical Center	Erasmus Medical Center
EPI2018061	NP	Netherlands	2022-Jan-26	EPI_ISL_12066188	A/Fox/Netherlands/EMC1/2022	Erasmus Medical Center	Erasmus Medical Center	R.A.M., Fouchier; S., Therwessen; O., Vuong; I., Chestakova; R., Sikkema; P., Lexmond; M., Pronk
EPI1995275	NP	Netherlands	2022-Feb-07	EPI_ISL_11019882	A/red fox/Netherlands/22002636-002/2022	Wageningen Bioveterinary Research	Wageningen Bioveterinary Research	Beerens, Nancy; Harders, Frank; Pritz-Verschuren, Sylvia; Roose, Marit; Venema, Sandra; Germeraad, Evelien; Engelsma, Marc; Heutink, Rene
EPI1995266	NP	Netherlands	2022-Jan-03	EPI_ISL_11019784	A/red fox/Netherlands/22000097-005/2022	Wageningen Bioveterinary Research	Wageningen Bioveterinary Research	Beerens, Nancy; Harders, Frank; Pritz-Verschuren, Sylvia; Roose, Marit; Venema, Sandra; Germeraad, Evelien; Engelsma, Marc; Heutink, Rene
EPI1988046	NP	Netherlands	2022-Feb-18	EPI_ISL_10454887	A/red fox/Netherlands/22003495-003/2022	Wageningen Bioveterinary Research	Wageningen Bioveterinary Research	Beerens, Nancy; Harders, Frank; Pritz-Verschuren, Sylvia; Roose, Marit; Venema, Sandra; Germeraad, Evelien; Engelsma, Marc; Heutink, Rene
EPI1987357	NP	Netherlands	2022-Feb-11	EPI_ISL_10255587	A/red fox/Netherlands/22002993-003 /2022	Wageningen Bioveterinary Research	Wageningen Bioveterinary Research	Beerens, Nancy; Harders, Frank; Pritz-Verschuren, Sylvia; Roose, Marit; Venema, Sandra; Germeraad, Evelien; Engelsma, Marc; Heutink, Rene
EPI1987349	NP	Netherlands	2022-Feb-11	EPI_ISL_10255581	A/red fox/Netherlands/22002992-003/2022	Wageningen Bioveterinary Research	Wageningen Bioveterinary Research	Beerens, Nancy; Harders, Frank; Pritz-Verschuren, Sylvia; Roose, Marit; Venema, Sandra; Germeraad, Evelien; Engelsma, Marc; Heutink, Rene
EPI1988018	NP	Netherlands	2021-Dec-03	EPI_ISL_7683138	A/red fox/Netherlands/21040099-007/2021	Wageningen Bioveterinary Research	Wageningen Bioveterinary Research	Beerens, Nancy; Harders, Frank; Pritz-Verschuren, Sylvia; Roose, Marit; Venema, Sandra; Germeraad, Evelien; Engelsma, Marc; Heutink, Rene
EPI1988010	NP	Netherlands	2021-Dec-03	EPI_ISL_7683137	A/red fox/Netherlands/21040099-006/2021	Wageningen Bioveterinary Research	Wageningen Bioveterinary Research	Beerens, Nancy; Harders, Frank; Pritz-Verschuren, Sylvia; Roose, Marit; Venema, Sandra; Germeraad, Evelien; Engelsma, Marc; Heutink, Rene
EPI1943558	NP	Netherlands	2021-Dec-03	EPI_ISL_7683118	A/red fox/Netherlands/21040099-001/2021	Wageningen Bioveterinary Research	Wageningen Bioveterinary Research	Beerens, Nancy; Harders, Frank; Pritz-Verschuren, Sylvia; Roose, Marit; Venema, Sandra; Germeraad, Evelien; Engelsma, Marc; Heutink, Rene
EPI3177561	NP	Germany	2023-Jun-12	EPI_ISL_19029378	A/Fox/Bavaria/i193/2023	Bayerisches Landesamt f√ºr Gesundheit und Lebensmittelsicherheit	Bayerisches Landesamt f√ºr Gesundheit und Lebensmittelsicherheit
EPI2730910	NP	United Kingdom	2023-Jul-26	EPI_ISL_18226744	A/red fox/Northern Ireland/22191/2023	AFBI - Agri-Food & Bioscience Institute	Agri-Food and Biosciences Institute (AFBINI)	Lagan, P.; Lemon, K.
EPI2730902	NP	United Kingdom	2023-Jul-26	EPI_ISL_18226743	A/red fox/Northern Ireland/22185/2023	AFBI - Agri-Food & Bioscience Institute	Agri-Food and Biosciences Institute (AFBINI)	Lagan, P.; Lemon, K.
EPI2697659	NP	Finland	2023-Jul-24	EPI_ISL_18123935	A/arctic-fox/Finland/615/2023	Finnish Food Authority	Finnish Institute for Health and Welfare, THL	Tuija Kantala, Alice Fusaro, Tuija Gadd, Monica Gallo, Niina Ikonen, Lauri Kareinen, Ari Kauppinen, Niina Tammiranta, Erika Lindh
EPI2697651	NP	Finland	2023-Jul-24	EPI_ISL_18123934	A/arctic-fox/Finland/614/2023	Finnish Food Authority	Finnish Institute for Health and Welfare, THL	Tuija Kantala, Alice Fusaro, Tuija Gadd, Monica Gallo, Niina Ikonen, Lauri Kareinen, Ari Kauppinen, Niina Tammiranta, Erika Lindh
EPI2697643	NP	Finland	2023-Jul-24	EPI_ISL_18123933	A/arctic-fox/Finland/613/2023	Finnish Food Authority	Finnish Institute for Health and Welfare, THL	Tuija Kantala, Alice Fusaro, Tuija Gadd, Monica Gallo, Niina Ikonen, Lauri Kareinen, Ari Kauppinen, Niina Tammiranta, Erika Lindh
EPI2697635	NP	Finland	2023-Jul-20	EPI_ISL_18123932	A/fox/Finland/610/2023	Finnish Food Authority	Finnish Institute for Health and Welfare, THL	Tuija Kantala, Alice Fusaro, Tuija Gadd, Monica Gallo, Niina Ikonen, Lauri Kareinen, Ari Kauppinen, Niina Tammiranta, Erika Lindh
EPI2697627	NP	Finland	2023-Jul-20	EPI_ISL_18123931	A/fox/Finland/602/2023	Finnish Food Authority	Finnish Institute for Health and Welfare, THL	Tuija Kantala, Alice Fusaro, Tuija Gadd, Monica Gallo, Niina Ikonen, Lauri Kareinen, Ari Kauppinen, Niina Tammiranta, Erika Lindh
EPI2697495	NP	Finland	2023-Jul-17	EPI_ISL_18122445	A/red-fox/Finland/553/2023	Finnish Food Authority	Finnish Institute for Health and Welfare, THL	Tuija Kantala, Alice Fusaro, Tuija Gadd, Monica Gallo, Niina Ikonen, Lauri Kareinen, Ari Kauppinen, Niina Tammiranta, Erika Lindh
EPI2697481	NP	Finland	2023-Jul-24	EPI_ISL_18122443	A/fox/Finland/612/2023	Finnish Food Authority	Finnish Institute for Health and Welfare, THL	Tuija Kantala, Alice Fusaro, Tuija Gadd, Monica Gallo, Niina Ikonen, Lauri Kareinen, Ari Kauppinen, Niina Tammiranta, Erika Lindh
EPI2697473	NP	Finland	2023-Jul-20	EPI_ISL_18122442	A/fox/Finland/603/2023	Finnish Food Authority	Finnish Institute for Health and Welfare, THL	Tuija Kantala, Alice Fusaro, Tuija Gadd, Monica Gallo, Niina Ikonen, Lauri Kareinen, Ari Kauppinen, Niina Tammiranta, Erika Lindh
EPI2697465	NP	Finland	2023-Jul-20	EPI_ISL_18122441	A/fox/Finland/601/2023	Finnish Food Authority	Finnish Institute for Health and Welfare, THL	Tuija Kantala, Alice Fusaro, Tuija Gadd, Monica Gallo, Niina Ikonen, Lauri Kareinen, Ari Kauppinen, Niina Tammiranta, Erika Lindh
EPI2697457	NP	Finland	2023-Jul-24	EPI_ISL_18122440	A/arctic-fox/Finland/622/2023	Finnish Food Authority	Finnish Institute for Health and Welfare, THL	Tuija Kantala, Alice Fusaro, Tuija Gadd, Monica Gallo, Niina Ikonen, Lauri Kareinen, Ari Kauppinen, Niina Tammiranta, Erika Lindh
EPI2697449	NP	Finland	2023-Jul-24	EPI_ISL_18122439	A/arctic-fox/Finland/621/2023	Finnish Food Authority	Finnish Institute for Health and Welfare, THL	Tuija Kantala, Alice Fusaro, Tuija Gadd, Monica Gallo, Niina Ikonen, Lauri Kareinen, Ari Kauppinen, Niina Tammiranta, Erika Lindh
EPI2697441	NP	Finland	2023-Jul-24	EPI_ISL_18122438	A/arctic-fox/Finland/620/2023	Finnish Food Authority	Finnish Institute for Health and Welfare, THL	Tuija Kantala, Alice Fusaro, Tuija Gadd, Monica Gallo, Niina Ikonen, Lauri Kareinen, Ari Kauppinen, Niina Tammiranta, Erika Lindh
EPI2697433	NP	Finland	2023-Jul-24	EPI_ISL_18122437	A/arctic-fox/Finland/619/2023	Finnish Food Authority	Finnish Institute for Health and Welfare, THL	Tuija Kantala, Alice Fusaro, Tuija Gadd, Monica Gallo, Niina Ikonen, Lauri Kareinen, Ari Kauppinen, Niina Tammiranta, Erika Lindh
EPI2697417	NP	Finland	2023-Jul-24	EPI_ISL_18122435	A/arctic-fox/Finland/616/2023	Finnish Food Authority	Finnish Institute for Health and Welfare, THL	Tuija Kantala, Alice Fusaro, Tuija Gadd, Monica Gallo, Niina Ikonen, Lauri Kareinen, Ari Kauppinen, Niina Tammiranta, Erika Lindh
EPI2697402	NP	Finland	2023-Jul-18	EPI_ISL_18122433	A/arctic-fox/Finland/577/2023	Finnish Food Authority	Finnish Institute for Health and Welfare, THL	Tuija Kantala, Alice Fusaro, Tuija Gadd, Monica Gallo, Niina Ikonen, Lauri Kareinen, Ari Kauppinen, Niina Tammiranta, Erika Lindh
EPI2697394	NP	Finland	2023-Jul-18	EPI_ISL_18122432	A/arctic-fox/Finland/576/2023	Finnish Food Authority	Finnish Institute for Health and Welfare, THL	Tuija Kantala, Alice Fusaro, Tuija Gadd, Monica Gallo, Niina Ikonen, Lauri Kareinen, Ari Kauppinen, Niina Tammiranta, Erika Lindh
EPI2697386	NP	Finland	2023-Jul-18	EPI_ISL_18122431	A/arctic-fox/Finland/575/2023	Finnish Food Authority	Finnish Institute for Health and Welfare, THL	Tuija Kantala, Alice Fusaro, Tuija Gadd, Monica Gallo, Niina Ikonen, Lauri Kareinen, Ari Kauppinen, Niina Tammiranta, Erika Lindh
EPI2697378	NP	Finland	2023-Jul-18	EPI_ISL_18122430	A/arctic-fox/Finland/574/2023	Finnish Food Authority	Finnish Institute for Health and Welfare, THL	Tuija Kantala, Alice Fusaro, Tuija Gadd, Monica Gallo, Niina Ikonen, Lauri Kareinen, Ari Kauppinen, Niina Tammiranta, Erika Lindh
EPI2697370	NP	Finland	2023-Jul-17	EPI_ISL_18122429	A/arctic-fox/Finland/567/2023	Finnish Food Authority	Finnish Institute for Health and Welfare, THL	Tuija Kantala, Alice Fusaro, Tuija Gadd, Monica Gallo, Niina Ikonen, Lauri Kareinen, Ari Kauppinen, Niina Tammiranta, Erika Lindh
EPI2697355	NP	Finland	2023-Jul-17	EPI_ISL_18122427	A/arctic-fox/Finland/565/2023	Finnish Food Authority	Finnish Institute for Health and Welfare, THL	Tuija Kantala, Alice Fusaro, Tuija Gadd, Monica Gallo, Niina Ikonen, Lauri Kareinen, Ari Kauppinen, Niina Tammiranta, Erika Lindh
EPI2697347	NP	Finland	2023-Jul-14	EPI_ISL_18122426	A/arctic-fox/Finland/549/2023	Finnish Food Authority	Finnish Institute for Health and Welfare, THL	Tuija Kantala, Alice Fusaro, Tuija Gadd, Monica Gallo, Niina Ikonen, Lauri Kareinen, Ari Kauppinen, Niina Tammiranta, Erika Lindh
EPI2697339	NP	Finland	2023-Jul-14	EPI_ISL_18122425	A/arctic-fox/Finland/547/2023	Finnish Food Authority	Finnish Institute for Health and Welfare, THL	Tuija Kantala, Alice Fusaro, Tuija Gadd, Monica Gallo, Niina Ikonen, Lauri Kareinen, Ari Kauppinen, Niina Tammiranta, Erika Lindh
EPI2697331	NP	Finland	2023-Jul-14	EPI_ISL_18122424	A/arctic-fox/Finland/544/2023	Finnish Food Authority	Finnish Institute for Health and Welfare, THL	Tuija Kantala, Alice Fusaro, Tuija Gadd, Monica Gallo, Niina Ikonen, Lauri Kareinen, Ari Kauppinen, Niina Tammiranta, Erika Lindh
EPI2697314	NP	Finland	2023-Jul-14	EPI_ISL_18122422	A/arctic-fox/Finland/542/2023	Finnish Food Authority	Finnish Institute for Health and Welfare, THL	Tuija Kantala, Alice Fusaro, Tuija Gadd, Monica Gallo, Niina Ikonen, Lauri Kareinen, Ari Kauppinen, Niina Tammiranta, Erika Lindh
EPI2697306	NP	Finland	2023-Jul-14	EPI_ISL_18122421	A/arctic-fox/Finland/536/2023	Finnish Food Authority	Finnish Institute for Health and Welfare, THL	Tuija Kantala, Alice Fusaro, Tuija Gadd, Monica Gallo, Niina Ikonen, Lauri Kareinen, Ari Kauppinen, Niina Tammiranta, Erika Lindh
EPI2697298	NP	Finland	2023-Jul-10	EPI_ISL_18122420	A/arctic-fox/Finland/504/2023	Finnish Food Authority	Finnish Institute for Health and Welfare, THL	Tuija Kantala, Alice Fusaro, Tuija Gadd, Monica Gallo, Niina Ikonen, Lauri Kareinen, Ari Kauppinen, Niina Tammiranta, Erika Lindh
EPI2697283	NP	Finland	2023-Jul-10	EPI_ISL_18122418	A/arctic-fox/Finland/495/2023	Finnish Food Authority	Finnish Institute for Health and Welfare, THL	Tuija Kantala, Alice Fusaro, Tuija Gadd, Monica Gallo, Niina Ikonen, Lauri Kareinen, Ari Kauppinen, Niina Tammiranta, Erika Lindh
EPI2608637	NP	Germany	2023-Mar-29	EPI_ISL_17880914	A/Red fox/Germany/51023-261/2023	Lower Saxony State Office for Consumer Protection and Food Safety	Lower Saxony State Office for Consumer Protection & Food Safety
EPI2608621	NP	Germany	2023-Feb-09	EPI_ISL_17880911	A/Red fox/Germany/51023-124/2023	Lower Saxony State Office for Consumer Protection and Food Safety	Lower Saxony State Office for Consumer Protection & Food Safety
EPI2608597	NP	Germany	2023-Jan-31	EPI_ISL_17880908	A/Red fox/Germany/51023-113/2023	Lower Saxony State Office for Consumer Protection and Food Safety	Lower Saxony State Office for Consumer Protection & Food Safety
EPI2608565	NP	Germany	2023-Jan-09	EPI_ISL_17880904	A/Red fox/Germany/51023-60/2023	Lower Saxony State Office for Consumer Protection and Food Safety	Lower Saxony State Office for Consumer Protection & Food Safety
EPI2467146	NP	France	2023-Feb-10	EPI_ISL_17233302	A/fox/France/23P002844/2023	Anses (Ploufragan-Plouzan√©)	ANSES Agence Nationale De Securite Sanitaire De L‚Äôalimentation
EPI2297257	NP	Belgium	2022-Dec-08	EPI_ISL_16549380	A/Vulpes_vulpes/Belgium/14775-0001/2022	Sciensano - Animal Infectious Diseases	Sciensano, Department of Animal Infectious Diseases	Van Borm, Steven; Roupie, Virginie; Hostyn, Pierre; Lambrecht, Benedicte; Steensels, Mieke
EPI3073426	NP	Germany	2024-Jan-01	EPI_ISL_18937337	A/fox/Germany-BW/2024AI00417/2024	Friedrich-Loeffler-Institut	Friedrich-Loeffler-Institut
EPI2764343	NP	Belgium	2023-May-17	EPI_ISL_18347730	A/Vulpes_vulpes/Belgium/04757_0004/2023	Sciensano - Animal Infectious Diseases	Sciensano, Department of Animal Infectious Diseases	Van Borm, Steven; Roupie, Virginie; Hostyn, Pierre; Mathijs, Elisabeth; Lambrecht, Benedicte; Steensels, Mieke
EPI2639290	NP	Japan	2023-Feb-20	EPI_ISL_17857959	A/Ezo red fox/Hokkaido/3/2023	Graduate School of Veterinary Medicine, Hokkaido University	Graduate School of Veterinary Medicine, Hokkaido University	Yoshihiro, Sakoda; Norikazu, Isoda; Takahiro, Hiono; Yik Lim, Hew; Tatsuru, Morita
EPI2585318	NP	Belgium	2023-Apr-24	EPI_ISL_17774571	A/Vulpes_Vulpes/Belgium/04018_0005/2023	Sciensano - Animal Infectious Diseases	Sciensano, Department of Animal Infectious Diseases	Van Borm, Steven; Roupie, Virginie; Hostyn, Pierre; Mathijs, Elisabeth; Lambrecht, Benedicte; Steensels, Mieke
EPI2585309	NP	Belgium	2023-Apr-24	EPI_ISL_17774570	A/Vulpes_Vulpes/Belgium/04016_0001/2023	Sciensano - Animal Infectious Diseases	Sciensano, Department of Animal Infectious Diseases	Van Borm, Steven; Roupie, Virginie; Hostyn, Pierre; Mathijs, Elisabeth; Lambrecht, Benedicte; Steensels, Mieke
EPI2585301	NP	Belgium	2023-Apr-14	EPI_ISL_17774358	A/Vulpes_Vulpes/Belgium/03704_0001/2023	Sciensano - Animal Infectious Diseases	Sciensano, Department of Animal Infectious Diseases	Van Borm, Steven; Roupie, Virginie; Hostyn, Pierre; Mathijs, Elisabeth; Lambrecht, Benedicte; Steensels, Mieke
EPI2585293	NP	Belgium	2023-Apr-14	EPI_ISL_17774357	A/Vulpes_Vulpes/Belgium/03703_0007/2023	Sciensano - Animal Infectious Diseases	Sciensano, Department of Animal Infectious Diseases	Van Borm, Steven; Roupie, Virginie; Hostyn, Pierre; Mathijs, Elisabeth; Lambrecht, Benedicte; Steensels, Mieke
EPI2585288	NP	Belgium	2023-Apr-14	EPI_ISL_17774308	A/Vulpes_Vulpes/Belgium/03703_0003/2023	Sciensano - Animal Infectious Diseases	Sciensano, Department of Animal Infectious Diseases	Van Borm, Steven; Roupie, Virginie; Hostyn, Pierre; Mathijs, Elisabeth; Lambrecht, Benedicte; Steensels, Mieke
EPI2585276	NP	Belgium	2023-Apr-14	EPI_ISL_17774224	A/Vulpes_Vulpes/Belgium/03703_0001/2023	Sciensano - Animal Infectious Diseases	Sciensano, Department of Animal Infectious Diseases	Van Borm, Steven; Roupie, Virginie; Hostyn, Pierre; Mathijs, Elisabeth; Lambrecht, Benedicte; Steensels, Mieke
EPI2584340	NP	Japan	2023-Apr-12	EPI_ISL_17766057	A/Ezo red fox/Hokkaido/2/2023	Graduate School of Veterinary Medicine, Hokkaido University	Graduate School of Veterinary Medicine, Hokkaido University	Yoshihiro,Sakoda; Norikazu,Isoda; Takahiro,Hiono; Yik Lim,Hew; Tatsuru,Morita
EPI2540298	NP	Belgium	2023-Feb-10	EPI_ISL_17606263	A/Vulpes_vulpes/Belgium/01295_0002/2023	Sciensano - Animal Infectious Diseases	Sciensano, Department of Animal Infectious Diseases	Van Borm, Steven; Roupie, Virginie; Hostyn, Pierre; Mathijs, Elisabeth; Lambrecht, Benedicte; Steensels, Mieke
EPI2499739	NP	Canada	2022-Apr-15	EPI_ISL_17393093	A/Red Fox/ON/FAV-0301-05/2022	Ontario Veterinary College, University of Guelph	Canadian Food Inspection Agency	Alkie, T; Ojkic, D; Stevens, B; Xu, W; Hisanaga, T; Koziuk, T; Fisher, M; Lung, O; Berhane, Y
EPI2259580	NP	Canada	2022-Apr-15	EPI_ISL_16248229	A/Red fox/ON/FAV-0301-05/2022	Ontario Veterinary College, University of Guelph	Canadian Food Inspection Agency	Alkie, Tamiru; Cox, Sherri; Ojkic, Davor; Stevens, Brian; Xu, Wanhong; Hisanaga, Tamiko; Suderman, Suderman; Koziuk, Janice; Kruczkiewicz, Peter; Nguyen, Hoang Hai; Fisher, Mathew; Lung, Oliver; Berhane, Yohannes
EPI2259572	NP	Canada	2022-May-24	EPI_ISL_16244526	A/Red fox/PEI/FAV-0592-01/2022	Atlantic Veterinary College, University of Prince Edward Island	Canadian Food Inspection Agency	Alkie, Tamiru; Yason, Carmencita; Jones, Megan E. B.; Bourque, Laura; Xu, Wanhong; Hisanaga, Tamiko; Suderman, Suderman; Koziuk, Janice; Kruczkiewicz, Peter; Nguyen, Hoang Hai; Fisher, Mathew; Lung, Oliver; Berhane, Yohannes
EPI2259312	NP	United States	2022-May-11	EPI_ISL_16243970	A/fox/Iowa/22-015357-002/2022	National Veterinary Services Laboratories - USDA	National Veterinary Services Laboratories - USDA	Chinh,Thanh;Love, Emily;Franzen,Kerrie;Killian,Mary;Koster,Leo;Lantz,Kristina;Stuber,Tod;Hicks,Jessica
EPI2258912	NP	United States	2022-Apr-22	EPI_ISL_16240637	A/fox/Michigan/22-014536-008/2022	National Veterinary Services Laboratories - USDA	National Veterinary Services Laboratories - USDA	Chinh,Thanh;Love, Emily;Franzen,Kerrie;Killian,Mary;Koster,Leo;Lantz,Kristina;Stuber,Tod;Hicks,Jessica
EPI2258904	NP	United States	2022-Apr-22	EPI_ISL_16240636	A/fox/Michigan/22-014536-007/2022	National Veterinary Services Laboratories - USDA	National Veterinary Services Laboratories - USDA	Chinh,Thanh;Love, Emily;Franzen,Kerrie;Killian,Mary;Koster,Leo;Lantz,Kristina;Stuber,Tod;Hicks,Jessica
EPI2258896	NP	United States	2022-Apr-22	EPI_ISL_16240635	A/fox/Michigan/22-014536-002/2022	National Veterinary Services Laboratories - USDA	National Veterinary Services Laboratories - USDA	Chinh,Thanh;Love, Emily;Franzen,Kerrie;Killian,Mary;Koster,Leo;Lantz,Kristina;Stuber,Tod;Hicks,Jessica
EPI2258888	NP	United States	2022-Apr-22	EPI_ISL_16240634	A/fox/Michigan/22-014536-001/2022	National Veterinary Services Laboratories - USDA	National Veterinary Services Laboratories - USDA	Chinh,Thanh;Love, Emily;Franzen,Kerrie;Killian,Mary;Koster,Leo;Lantz,Kristina;Stuber,Tod;Hicks,Jessica
EPI2236679	NP	Canada	2022-Jun-10	EPI_ISL_16023371	A/Red Fox/AB/FAV-0835-13/2022	Alberta Agriculture and Forestry, Government of Alberta	Canadian Food Inspection Agency	Alkie, Tamiru; Hicks, Mark; Pybuse, Margo J; Xu, Wanhong; Hisanaga, Tamiko; Suderman, Suderman; Koziuk, Janice; Kruczkiewicz, Peter; Nguyen, Hoang Hai; Fisher, Mathew; Lung, Oliver; Berhane, Yohannes
EPI2236671	NP	Canada	2022-May-05	EPI_ISL_16023370	A/Red Fox/AB/FAV-0835-02/2022	Alberta Agriculture and Forestry, Government of Alberta	Canadian Food Inspection Agency	Alkie, Tamiru; Hicks, Mark; Pybuse, Margo J; Xu, Wanhong; Hisanaga, Tamiko; Suderman, Suderman; Koziuk, Janice; Kruczkiewicz, Peter; Nguyen, Hoang Hai; Fisher, Mathew; Lung, Oliver; Berhane, Yohannes
EPI2236554	NP	Canada	2022-May-05	EPI_ISL_16023345	A/Red Fox/AB/FAV-0835-01/2022	Alberta Agriculture and Forestry, Government of Alberta	Canadian Food Inspection Agency	Alkie, Tamiru; Hicks, Mark; Pybuse, Margo; Xu, Wanhong; Hisanaga, Tamiko; Suderman, Suderman; Koziuk, Janice; Kruczkiewicz, Peter; Nguyen, Hoang Hai; Fisher, Mathew; Lung, Oliver; Berhane, Yohannes
EPI2236496	NP	Canada	2022-May-24	EPI_ISL_16020774	A/Red Fox/PEI/FAV-0591-01/2022	Atlantic Veterinary College, University of Prince Edward Island	Canadian Food Inspection Agency	Alkie, Tamiru; Yason, Carmencita; Jones, E.B. Megan; Bourque, Laura; Xu, Wanhong; Hisanaga, Tamiko; Suderman, Suderman; Koziuk, Janice; Kruczkiewicz, Peter; Nguyen, Hoang Hai; Fisher, Mathew; Lung, Oliver; Berhane, Yohannes
EPI2236488	NP	Canada	2022-May-19	EPI_ISL_16020773	A/Red Fox/PEI/FAV-0544/2022	Atlantic Veterinary College, University of Prince Edward Island	Canadian Food Inspection Agency	Alkie, Tamiru; Yason, Carmencita; Jones, E.B. Megan; Bourque, Laura; Xu, Wanhong; Hisanaga, Tamiko; Suderman, Suderman; Koziuk, Janice; Kruczkiewicz, Peter; Nguyen, Hoang Hai; Fisher, Mathew; Lung, Oliver; Berhane, Yohannes
EPI2236480	NP	Canada	2022-May-24	EPI_ISL_16020772	A/Red Fox/PEI/FAV-0592-02/2022	Atlantic Veterinary College, University of Prince Edward Island	Canadian Food Inspection Agency	Alkie, Tamiru; Yason, Carmencita; Jones, E.B. Megan; Bourque, Laura; Xu, Wanhong; Hisanaga, Tamiko; Suderman, Suderman; Koziuk, Janice; Kruczkiewicz, Peter; Nguyen, Hoang Hai; Fisher, Mathew; Lung, Oliver; Berhane, Yohannes
EPI2236769	NP	Canada	2022-Apr-22	EPI_ISL_16014529	A/Red Fox/ON/FAV-0558-02/2022	Ontario Veterinary College, University of Guelph	Canadian Food Inspection Agency	Alkie, Tamiru; Cox, Sherri; Ojkic, Davor; Stevens, Brian; Xu, Wanhong; Hisanaga, Tamiko; Suderman, Suderman; Koziuk, Janice; Kruczkiewicz, Peter; Nguyen, Hoang Hai; Fisher, Mathew; Lung, Oliver; Berhane, Yohannes
EPI2236293	NP	Canada	2022-Apr-22	EPI_ISL_16014527	A/Red Fox/ON/FAV-0558-01/2022	Ontario Veterinary College, University of Guelph	Canadian Food Inspection Agency	Alkie, Tamiru; Cox, Sherri; Ojkic, Davor; Stevens, Brian; Xu, Wanhong; Hisanaga, Tamiko; Suderman, Suderman; Koziuk, Janice; Kruczkiewicz, Peter; Nguyen, Hoang Hai; Fisher, Mathew; Lung, Oliver; Berhane, Yohannes
EPI2236257	NP	Canada	2022-Apr-16	EPI_ISL_16014448	A/Red Fox/ON/FAV-0531/2022	Ontario Veterinary College, University of Guelph	Canadian Food Inspection Agency	Alkie, Tamiru; Cox, Sherri; Ojkic, Davor; Stevens, Brian; Xu, Wanhong; Hisanaga, Tamiko; Suderman, Suderman; Koziuk, Janice; Kruczkiewicz, Peter; Nguyen, Hoang Hai; Fisher, Mathew; Lung, Oliver; Berhane, Yohannes
EPI2236249	NP	Canada	2022-Apr-13	EPI_ISL_16014445	A/Red Fox/ON/FAV-0300-06/2022	Ontario Veterinary College, University of Guelph	Canadian Food Inspection Agency	Alkie, Tamiru; Cox, Sherri; Ojkic, Davor; Stevens, Brian; Xu, Wanhong; Hisanaga, Tamiko; Suderman, Suderman; Koziuk, Janice; Kruczkiewicz, Peter; Nguyen, Hoang Hai; Fisher, Mathew; Lung, Oliver; Berhane, Yohannes
EPI2236241	NP	Canada	2022-Apr-22	EPI_ISL_16014368	A/Red Fox/ON/FAV-0300-05/2022	Ontario Veterinary College, University of Guelph	Canadian Food Inspection Agency	Alkie, Tamiru; Cox, Sherri; Ojkic, Davor; Stevens, Brian; Xu, Wanhong; Hisanaga, Tamiko; Suderman, Suderman; Koziuk, Janice; Kruczkiewicz, Peter; Nguyen, Hoang Hai; Fisher, Mathew; Lung, Oliver; Berhane, Yohannes
EPI2131373	NP	United States	2022-May-04	EPI_ISL_14552975	A/Vulpes vulpes/New_York/099451/2022	Cornell University	Cornell University	Diel, Diego G; Caserta, Leonardo Cardia; Cronk, Brittany D.
EPI2129833	NP	Belgium	2022-Jun-16	EPI_ISL_14494796	A/Vulpes_vulpes/Belgium/9031_0008/2022	Sciensano - Animal Infectious Diseases	Sciensano, Department of Animal Infectious Diseases	Van Borm, Steven; Mathijs, Elisabeth; Roupie, Virginie; Vervaeke, Muriel; Lambrecht, Benedicte; Steensels, Mieke
EPI2053946	NP	United States	2022-May-06	EPI_ISL_13052728	A/fox/Wisconsin/22-014746-029/2022	National Veterinary Services Laboratories - USDA	National Veterinary Services Laboratories - USDA	Chinh,Thanh;Franzen,Kerrie;Love, Emily;Killian,Mary;Koster,Leo;Lantz,Kristina;Stuber,Tod;Hicks,Jessica
EPI2053938	NP	United States	2022-May-06	EPI_ISL_13052727	A/fox/Wisconsin/22-014746-023/2022	National Veterinary Services Laboratories - USDA	National Veterinary Services Laboratories - USDA	Chinh,Thanh;Franzen,Kerrie;Love, Emily;Killian,Mary;Koster,Leo;Lantz,Kristina;Stuber,Tod;Hicks,Jessica
EPI2053930	NP	United States	2022-May-03	EPI_ISL_13052726	A/fox/Wisconsin/22-014746-016/2022	National Veterinary Services Laboratories - USDA	National Veterinary Services Laboratories - USDA	Chinh,Thanh;Franzen,Kerrie;Love, Emily;Killian,Mary;Koster,Leo;Lantz,Kristina;Stuber,Tod;Hicks,Jessica
EPI2053922	NP	United States	2022-May-03	EPI_ISL_13052725	A/fox/Wisconsin/22-014746-010/2022	National Veterinary Services Laboratories - USDA	National Veterinary Services Laboratories - USDA	Chinh,Thanh;Franzen,Kerrie;Love, Emily;Killian,Mary;Koster,Leo;Lantz,Kristina;Stuber,Tod;Hicks,Jessica
EPI2053914	NP	United States	2022-May-09	EPI_ISL_13052724	A/fox/Minnesota/22-014661-001/2022	National Veterinary Services Laboratories - USDA	National Veterinary Services Laboratories - USDA	Chinh,Thanh;Franzen,Kerrie;Love, Emily;Killian,Mary;Koster,Leo;Lantz,Kristina;Stuber,Tod;Hicks,Jessica
EPI2053906	NP	United States	2022-May-10	EPI_ISL_13052723	A/fox/Minnesota/22-014660-002/2022	National Veterinary Services Laboratories - USDA	National Veterinary Services Laboratories - USDA	Chinh,Thanh;Franzen,Kerrie;Love, Emily;Killian,Mary;Koster,Leo;Lantz,Kristina;Stuber,Tod;Hicks,Jessica
EPI2053898	NP	United States	2022-May-10	EPI_ISL_13052722	A/fox/Minnesota/22-014660-001/2022	National Veterinary Services Laboratories - USDA	National Veterinary Services Laboratories - USDA	Chinh,Thanh;Franzen,Kerrie;Love, Emily;Killian,Mary;Koster,Leo;Lantz,Kristina;Stuber,Tod;Hicks,Jessica
EPI2053890	NP	United States	2022-May-06	EPI_ISL_13052721	A/fox/Iowa/22-014421-001/2022	National Veterinary Services Laboratories - USDA	National Veterinary Services Laboratories - USDA	Chinh,Thanh;Franzen,Kerrie;Love, Emily;Killian,Mary;Koster,Leo;Lantz,Kristina;Stuber,Tod;Hicks,Jessica
EPI2053882	NP	United States	2022-Apr-22	EPI_ISL_13052720	A/fox/Minnesota/22-014182-001/2022	National Veterinary Services Laboratories - USDA	National Veterinary Services Laboratories - USDA	Chinh,Thanh;Franzen,Kerrie;Love, Emily;Killian,Mary;Koster,Leo;Lantz,Kristina;Stuber,Tod;Hicks,Jessica
EPI2053874	NP	United States	2022-May-01	EPI_ISL_13052719	A/fox/Wisconsin/22-013774-014/2022	National Veterinary Services Laboratories - USDA	National Veterinary Services Laboratories - USDA	Chinh,Thanh;Franzen,Kerrie;Love, Emily;Killian,Mary;Koster,Leo;Lantz,Kristina;Stuber,Tod;Hicks,Jessica
EPI2053866	NP	United States	2022-May-01	EPI_ISL_13052718	A/fox/Wisconsin/22-013774-009/2022	National Veterinary Services Laboratories - USDA	National Veterinary Services Laboratories - USDA	Chinh,Thanh;Franzen,Kerrie;Love, Emily;Killian,Mary;Koster,Leo;Lantz,Kristina;Stuber,Tod;Hicks,Jessica
EPI2053858	NP	United States	2022-May-01	EPI_ISL_13052717	A/fox/Wisconsin/22-013774-002/2022	National Veterinary Services Laboratories - USDA	National Veterinary Services Laboratories - USDA	Chinh,Thanh;Franzen,Kerrie;Love, Emily;Killian,Mary;Koster,Leo;Lantz,Kristina;Stuber,Tod;Hicks,Jessica
EPI2021933	NP	Japan	2022-Mar-31	EPI_ISL_12174842	A/Ezo red fox/Hokkaido/1/2022	Graduate School of Veterinary Medicine, Hokkaido University	Graduate School of Veterinary Medicine, Hokkaido University	Yoshihiro, SAKODA; Takahiro, HIONO; Norikazu, ISODA
EPI1998131	NP	Ireland	2022-Feb-14	EPI_ISL_11259283	A/fox/Ireland/3866_22VIR2064-1/2022	Central Veterinary Research Laboratory	Istituto Zooprofilattico Sperimentale delle Venezie	Byrne, C.; Garcia, K.; Cuartero, L.G.; Barbierato, G.; Zecchin, B.; Fusaro, A.; Schivo, A.; Salviato, A.; Palumbo, E.; Giussani, E.; Monne, I.; Terregino, C.
EPI3217370	PA	Netherlands	2021-Dec-03	EPI_ISL_19057417	A/red fox/Netherlands/21040099-006_PB2K/2021	Wageningen Bioveterinary Research	Wageningen Bioveterinary Research	Beerens, Nancy; Harders, Frank; Pritz-Verschuren, Sylvia; Roose, Marit; Venema, Sandra; Germeraad, Evelien; Engelsma, Marc; Heutink, Rene
EPI3217362	PA	Netherlands	2021-Dec-03	EPI_ISL_19057416	A/red fox/Netherlands/21040099-006_PB2E/2021	Wageningen Bioveterinary Research	Wageningen Bioveterinary Research	Beerens, Nancy; Harders, Frank; Pritz-Verschuren, Sylvia; Roose, Marit; Venema, Sandra; Germeraad, Evelien; Engelsma, Marc; Heutink, Rene
EPI2837095	PA	Finland	2023-Aug-07	EPI_ISL_18618528	A/arctic-fox/Finland/752/2023	Finnish Food Authority	Finnish Food Authority	Kauppinen, Ari; Kareinen, Lauri; Tammiranta, Niina; Kantala, Tuija; Fusaro, Alice; Gadd, Tuija
EPI2837087	PA	Finland	2023-Aug-04	EPI_ISL_18618442	A/arctic-fox/Finland/682/2023	Finnish Food Authority	Finnish Food Authority	Kauppinen, Ari; Kareinen, Lauri; Tammiranta, Niina; Kantala, Tuija; Fusaro, Alice; Gadd, Tuija
EPI2760282	PA	Finland	2023-Jul-10	EPI_ISL_18321745	A/arctic-fox/Finland/HVVI_503_23_23VIR6803-6/2023	Finnish Food Authority	Istituto Zooprofilattico Sperimentale Delle Venezie	Gadd, T.; Tammiranta, N; Kantala, K.; Nokireki, T.; Pastori, A.; Zecchin, B.; Fusaro, A.; Schivo, A.; Salviato, A.; Palumbo, E.; Giussani, E.; Monne, I.; Terregino, C.
EPI2760274	PA	Finland	2023-Jul-06	EPI_ISL_18321744	A/arctic-fox/Finland/HVVI_491_23_23VIR6803-1/2023	Finnish Food Authority	Istituto Zooprofilattico Sperimentale Delle Venezie	Gadd, T.; Tammiranta, N; Kantala, K.; Nokireki, T.; Pastori, A.; Zecchin, B.; Fusaro, A.; Schivo, A.; Salviato, A.; Palumbo, E.; Giussani, E.; Monne, I.; Terregino, C.
EPI2760266	PA	Finland	2023-Jul-06	EPI_ISL_18321743	A/arctic-fox/Finland/HVVI_492_23_23VIR6803-2/2023	Finnish Food Authority	Istituto Zooprofilattico Sperimentale Delle Venezie	Gadd, T.; Tammiranta, N; Kantala, K.; Nokireki, T.; Pastori, A.; Zecchin, B.; Fusaro, A.; Schivo, A.; Salviato, A.; Palumbo, E.; Giussani, E.; Monne, I.; Terregino, C.
EPI2755526	PA	Finland	2023-Jul-10	EPI_ISL_18292967	A/arctic-fox/Finland/501/2023	Finnish Food Authority	Finnish Food Authority	Kauppinen, Ari; Kareinen, Lauri; Tammiranta, Niina; Kantala, Tuija; Fusaro, Alice; Gadd, Tuija
EPI2755498	PA	Finland	2023-Aug-04	EPI_ISL_18292963	A/arctic-fox/Finland/684/2023	Finnish Food Authority	Finnish Food Authority	Kauppinen, Ari; Kareinen, Lauri; Tammiranta, Niina; Kantala, Tuija; Fusaro, Alice; Giussani, Edoardo; Gadd, Tuija
EPI2755458	PA	Finland	2023-Aug-01	EPI_ISL_18292958	A/arctic-fox/Finland/675/2023	Finnish Food Authority	Finnish Food Authority	Kauppinen, Ari; Kareinen, Lauri; Tammiranta, Niina; Kantala, Tuija; Fusaro, Alice; Giussani, Edoardo; Gadd, Tuija
EPI2755426	PA	Finland	2023-Jul-31	EPI_ISL_18292954	A/arctic-fox/Finland/666/2023	Finnish Food Authority	Finnish Food Authority	Kauppinen, Ari; Kareinen, Lauri; Tammiranta, Niina; Kantala, Tuija; Fusaro, Alice; Galiano, Monica; Ikonen, Niina; Lindh, Erika; Gadd, Tuija
EPI2701771	PA	Finland	2023-Aug-04	EPI_ISL_18131279	A/silver fox/Finland/2023AI06834_029/2023	University of Helsinki, Department of Virology	Friedrich-Loeffler-Institut
EPI2701763	PA	Finland	2023-Aug-03	EPI_ISL_18131278	A/silver fox/Finland/2023AI06838_033/2023	University of Helsinki, Department of Virology	Friedrich-Loeffler-Institut
EPI2701755	PA	Finland	2023-Aug-03	EPI_ISL_18131277	A/red fox/Finland/2023AI06879_074/2023	University of Helsinki, Department of Virology	Friedrich-Loeffler-Institut
EPI2701747	PA	Finland	2023-Aug-03	EPI_ISL_18131276	A/blue fox/Finland/2023AI06820_015/2023	University of Helsinki, Department of Virology	Friedrich-Loeffler-Institut
EPI2235559	PA	Canada	2022-May-09	EPI_ISL_16003265	A/Red Fox/MB/FAV-414-004/2022	Manitoba Agriculture	Canadian Food Inspection Agency	Alkie, Tamiru; Cox, Sherri; Pople, Neil; Xu, Wanhong; Hisanaga, Tamiko; Suderman, Suderman; Koziuk, Janice; Kruczkiewicz, Peter; Nguyen, Hoang Hai; Fisher, Mathew; Lung, Oliver; Berhane, Yohannes
EPI2197236	PA	Finland	2021-Nov-01	EPI_ISL_15518271	A/red_fox/Finland/2891_21RS3535-1/2021	Finnish Food Authority	Istituto Zooprofilattico Sperimentale Delle Venezie	Tammiranta, N.;Kantala, T.;Laamanen, I.;Gadd, T.;Zecchin, B.;Fusaro, A.;Schivo, A.;Salviato, A.;Palumbo, E.;Milani, A.;Giussani, E.;Pastori, A.;Monne, I.;Terregino, C.
EPI2131358	PA	United States	2022-Apr-25	EPI_ISL_14551957	A/Vulpes vulpes/New_York/088592/2022	Cornell University	Cornell University	Diel, Diego G; Caserta, Leonardo Cardia; Cronk, Brittany D.
EPI2018079	PA	Netherlands	2022-Jan-22	EPI_ISL_12069289	A/Fox/Netherlands/EMC3/2022	Erasmus Medical Center	Erasmus Medical Center	R.A.M., Fouchier; S., Thewessen; O., Vuong; I., Chestakova; R., Sikkema; P., Lexmond; M., Pronk
EPI1994442	PA	Netherlands	2022-Mar-01	EPI_ISL_10915976	A/red fox/Netherlands/22004172-003/2022	Wageningen Bioveterinary Research	Wageningen Bioveterinary Research	Beerens, Nancy; Harders, Frank; Pritz-Verschuren, Sylvia; Roose, Marit; Venema, Sandra; Germeraad, Evelien; Engelsma, Marc; Heutink, Rene
EPI1987222	PA	Netherlands	2022-Feb-08	EPI_ISL_10220428	A/red fox/Netherlands/22002722-004/2022	Wageningen Bioveterinary Research	Wageningen Bioveterinary Research	Beerens, Nancy; Harders, Frank; Pritz-Verschuren, Sylvia; Roose, Marit; Venema, Sandra; Germeraad, Evelien; Engelsma, Marc; Heutink, Rene
EPI1987214	PA	Netherlands	2022-Feb-07	EPI_ISL_10220427	A/red fox/Netherlands/22002636-005/2022	Wageningen Bioveterinary Research	Wageningen Bioveterinary Research	Beerens, Nancy; Harders, Frank; Pritz-Verschuren, Sylvia; Roose, Marit; Venema, Sandra; Germeraad, Evelien; Engelsma, Marc; Heutink, Rene
EPI1981016	PA	Netherlands	2022-Jan-31	EPI_ISL_9616272	A/red fox/Netherlands/22002191-003/2022	Wageningen Bioveterinary Research	Wageningen Bioveterinary Research	Beerens, Nancy; Harders, Frank; Pritz-Verschuren, Sylvia; Roose, Marit; Venema, Sandra; Germeraad, Evelien; Engelsma, Marc; Heutink, Rene
EPI1981008	PA	Netherlands	2022-Jan-31	EPI_ISL_9616271	A/red fox/Netherlands/22002190-003/2022	Wageningen Bioveterinary Research	Wageningen Bioveterinary Research	Beerens, Nancy; Harders, Frank; Pritz-Verschuren, Sylvia; Roose, Marit; Venema, Sandra; Germeraad, Evelien; Engelsma, Marc; Heutink, Rene
EPI1980992	PA	Netherlands	2022-Jan-27	EPI_ISL_9616265	A/red fox/Netherlands/22001901-005/2022	Wageningen Bioveterinary Research	Wageningen Bioveterinary Research	Beerens, Nancy; Harders, Frank; Pritz-Verschuren, Sylvia; Roose, Marit; Venema, Sandra; Germeraad, Evelien; Engelsma, Marc; Heutink, Rene
EPI1956636	PA	Netherlands	2022-Jan-03	EPI_ISL_8650947	A/red fox/Netherlands/22000097-004/2022	Wageningen Bioveterinary Research	Wageningen Bioveterinary Research	Beerens, Nancy; Harders, Frank; Pritz-Verschuren, Sylvia; Roose, Marit; Venema, Sandra; Germeraad, Evelien; Engelsma, Marc; Heutink, Rene
EPI1859952	PA	Netherlands	2021-May-17	EPI_ISL_2194219	A/red fox/Netherlands/21028774-004/2021	Wageningen Bioveterinary Research	Wageningen Bioveterinary Research	Beerens, Nancy; Harders, Frank; Pritz-Verschuren, Sylvia; Roose, Marit; Germeraad, Evelien; Engelsma, Marc; Bossers, Alex; Heutink, Rene
EPI2697614	PA	Finland	2023-Jul-31	EPI_ISL_18123725	A/arctic-fox/Finland/660/2023	Finnish Food Authority	Finnish Institute for Health and Welfare, THL	Tuija Kantala, Alice Fusaro, Tuija Gadd, Monica Gallo, Niina Ikonen, Lauri Kareinen, Ari Kauppinen, Niina Tammiranta, Erika Lindh
EPI2697606	PA	Finland	2023-Jul-27	EPI_ISL_18123724	A/arctic-fox/Finland/654/2023	Finnish Food Authority	Finnish Institute for Health and Welfare, THL	Tuija Kantala, Alice Fusaro, Tuija Gadd, Monica Gallo, Niina Ikonen, Lauri Kareinen, Ari Kauppinen, Niina Tammiranta, Erika Lindh
EPI2697591	PA	Finland	2023-Jul-17	EPI_ISL_18123722	A/arctic-fox/Finland/564/2023	Finnish Food Authority	Finnish Institute for Health and Welfare, THL	Tuija Kantala, Alice Fusaro, Tuija Gadd, Monica Gallo, Niina Ikonen, Lauri Kareinen, Ari Kauppinen, Niina Tammiranta, Erika Lindh
EPI2468403	PA	Belgium	2023-Mar-02	EPI_ISL_17245141	A/Vulpes_vulpes/Belgium/01924_0003/2023	Sciensano - Animal Infectious Diseases	Sciensano, Department of Animal Infectious Diseases	Van Borm, Steven; Roupie, Virginie; Hostyn, Pierre; Mathijs, Elisabeth; Lambrecht, Benedicte; Steensels, Mieke
EPI2468395	PA	Belgium	2023-Feb-27	EPI_ISL_17245099	A/Vulpes_vulpes/Belgium/01784_0010/2023	Sciensano - Animal Infectious Diseases	Sciensano, Department of Animal Infectious Diseases	Van Borm, Steven; Roupie, Virginie; Hostyn, Pierre; Mathijs, Elisabeth; Lambrecht, Benedicte; Steensels, Mieke
EPI2468387	PA	Belgium	2023-Feb-27	EPI_ISL_17245098	A/Vulpes_vulpes/Belgium/01784_0008/2023	Sciensano - Animal Infectious Diseases	Sciensano, Department of Animal Infectious Diseases	Van Borm, Steven; Roupie, Virginie; Hostyn, Pierre; Mathijs, Elisabeth; Lambrecht, Benedicte; Steensels, Mieke
EPI2468379	PA	Belgium	2023-Feb-27	EPI_ISL_17244973	A/Vulpes_vulpes/Belgium/01784_0004/2023	Sciensano - Animal Infectious Diseases	Sciensano, Department of Animal Infectious Diseases	Van Borm, Steven; Roupie, Virginie; Hostyn, Pierre; Mathijs, Elisabeth; Lambrecht, Benedicte; Steensels, Mieke
EPI2856914	PA	Canada	2023-Aug-22	EPI_ISL_18665627	A/Red_Fox/BC/AIVPHL-1286/2023	B.C. Centre for Disease Control	Public Health Agency of Canada	Himsworth, Chelsea; Prystajecky,Natalie; Tyson,John; Jassem,Agatha; Kuchinski,Kevin; Coombe, Michelle; Lee,Tracy; Azana,Rob; Fung,Janet; Chan,Michael; Cheung,Branco; Caleta,Jessica; Tsang,Frankie; Yang,Kevin; Russell,Shannon; Zlosnik,James; Hoang,Linda
EPI2782178	PA	Norway	2022-Jul-26	EPI_ISL_18455203	A/Red_fox/Norway/2022-07-1768-2T/2022	Norwegian Veterinary Institute	Norwegian Veterinary Institute	Britt Gjerset, Cathrine Arnason B√∏e
EPI2677003	PA	United States	2022-May-27	EPI_ISL_18090482	A/red fox/Michigan/22-018712-003/2022	National Veterinary Services Laboratories - USDA	National Veterinary Services Laboratories - USDA	Chinh,Thanh;Franzen,Kerrie;Love,Emily;Ozella,Mikaela;Killian,Mary;Lantz,Kristina;Stuber,Tod;Hicks,Jessica;Norris,Cameron
EPI2540331	PA	Belgium	2023-Mar-29	EPI_ISL_17606758	A/Vulpes_vulpes/Belgium/03117_0004/2023	Sciensano - Animal Infectious Diseases	Sciensano, Department of Animal Infectious Diseases	Van Borm, Steven; Roupie, Virginie; Hostyn, Pierre; Mathijs, Elisabeth; Lambrecht, Benedicte; Steensels, Mieke
EPI2540321	PA	Belgium	2023-Mar-29	EPI_ISL_17606757	A/Vulpes_vulpes/Belgium/03117_0001/2023	Sciensano - Animal Infectious Diseases	Sciensano, Department of Animal Infectious Diseases	Van Borm, Steven; Roupie, Virginie; Hostyn, Pierre; Mathijs, Elisabeth; Lambrecht, Benedicte; Steensels, Mieke
EPI2540313	PA	Belgium	2023-Mar-14	EPI_ISL_17606756	A/Vulpes_vulpes/Belgium/02359_0006/2023	Sciensano - Animal Infectious Diseases	Sciensano, Department of Animal Infectious Diseases	Van Borm, Steven; Roupie, Virginie; Hostyn, Pierre; Mathijs, Elisabeth; Lambrecht, Benedicte; Steensels, Mieke
EPI2540305	PA	Belgium	2023-Mar-14	EPI_ISL_17606755	A/Vulpes_vulpes/Belgium/02359_0002/2023	Sciensano - Animal Infectious Diseases	Sciensano, Department of Animal Infectious Diseases	Van Borm, Steven; Roupie, Virginie; Hostyn, Pierre; Mathijs, Elisabeth; Lambrecht, Benedicte; Steensels, Mieke
EPI2513406	PA	Canada	2023-Jan-31	EPI_ISL_17494318	A/Red Fox/NL/FAV-0075/2023	Atlantic Veterinary College, University of Prince Edward Island	Canadian Food Inspection Agency	Parma, L; Hisanaga, T; Xu, W; Alkie, T; Jones, M; Yason, C; Lung, O; Berhane, Y
EPI2576156	PA	Denmark	2022-Apr-28	EPI_ISL_17447440	A/red fox/Denmark/08658-3.02-2/2022	Statens Serumm Institute	Statens Serum Institute	Hjulsager,Charlotte;Liang,Yuan
EPI2576140	PA	Denmark	2022-Apr-28	EPI_ISL_17447413	A/red fox/Denmark/08658-1.01/2022	Statens Serumm Institute	Statens Serum Institute	Hjulsager,Charlotte; Liang,Yuan
EPI2576132	PA	Denmark	2022-Jan-17	EPI_ISL_17447412	A/red fox/Denmark/01679-1.01-2/2022	Statens Serum Institute	Statens Serum Institute	Hjulsager,Charlotte; Liang,Yuan
EPI2500048	PA	Canada	2022-May-19	EPI_ISL_17394088	A/Red Fox/PEI/FAV-0544-P1/2022	Atlantic Veterinary College, University of Prince Edward Island	Canadian Food Inspection Agency	Alkie, T; Yason, C; Jones, M; Xu, W; Hisanaga, T; Koziuk, T; Fisher, M; Lung, O; Berhane, Y
EPI2473764	PA	United States	2022-Jul-06	EPI_ISL_17260687	A/red fox/Michigan/22-021733-007/2022	National Veterinary Services Laboratories - USDA	National Veterinary Services Laboratories - USDA	Chinh,Thanh;Franzen,Kerrie;Love,Emily;Killian,Mary;Koster,Leo;Lantz,Kristina;Stuber,Tod;Hicks,Jessica;Norris,Cameron
EPI2473750	PA	United States	2022-Jul-06	EPI_ISL_17260686	A/red fox/Michigan/22-021733-005/2022	National Veterinary Services Laboratories - USDA	National Veterinary Services Laboratories - USDA	Chinh,Thanh;Franzen,Kerrie;Love,Emily;Killian,Mary;Koster,Leo;Lantz,Kristina;Stuber,Tod;Hicks,Jessica;Norris,Cameron
EPI2473731	PA	United States	2022-Jul-06	EPI_ISL_17260685	A/red fox/Michigan/22-021733-003/2022	National Veterinary Services Laboratories - USDA	National Veterinary Services Laboratories - USDA	Chinh,Thanh;Franzen,Kerrie;Love,Emily;Killian,Mary;Koster,Leo;Lantz,Kristina;Stuber,Tod;Hicks,Jessica;Norris,Cameron
EPI2473713	PA	United States	2022-Jul-06	EPI_ISL_17260684	A/red fox/Michigan/22-021733-002/2022	National Veterinary Services Laboratories - USDA	National Veterinary Services Laboratories - USDA	Chinh,Thanh;Franzen,Kerrie;Love,Emily;Killian,Mary;Koster,Leo;Lantz,Kristina;Stuber,Tod;Hicks,Jessica;Norris,Cameron
EPI2473668	PA	United States	2022-Jun-15	EPI_ISL_17260681	A/red fox/Alaska/22-019272-001/2022	National Veterinary Services Laboratories - USDA	National Veterinary Services Laboratories - USDA	Chinh,Thanh;Franzen,Kerrie;Love,Emily;Killian,Mary;Koster,Leo;Lantz,Kristina;Stuber,Tod;Hicks,Jessica;Norris,Cameron
EPI2473640	PA	United States	2022-May-27	EPI_ISL_17260679	A/red fox/Michigan/22-018712-005/2022	National Veterinary Services Laboratories - USDA	National Veterinary Services Laboratories - USDA	Chinh,Thanh;Franzen,Kerrie;Love,Emily;Killian,Mary;Koster,Leo;Lantz,Kristina;Stuber,Tod;Hicks,Jessica;Norris,Cameron
EPI2473626	PA	United States	2022-May-10	EPI_ISL_17260678	A/red fox/Michigan/22-017507-008/2022	National Veterinary Services Laboratories - USDA	National Veterinary Services Laboratories - USDA	Chinh,Thanh;Franzen,Kerrie;Love,Emily;Killian,Mary;Koster,Leo;Lantz,Kristina;Stuber,Tod;Hicks,Jessica;Norris,Cameron
EPI2473612	PA	United States	2022-May-05	EPI_ISL_17260677	A/red fox/Michigan/22-017507-007/2022	National Veterinary Services Laboratories - USDA	National Veterinary Services Laboratories - USDA	Chinh,Thanh;Franzen,Kerrie;Love,Emily;Killian,Mary;Koster,Leo;Lantz,Kristina;Stuber,Tod;Hicks,Jessica;Norris,Cameron
EPI2473598	PA	United States	2022-May-18	EPI_ISL_17260676	A/red fox/Michigan/22-017507-006/2022	National Veterinary Services Laboratories - USDA	National Veterinary Services Laboratories - USDA	Chinh,Thanh;Franzen,Kerrie;Love,Emily;Killian,Mary;Koster,Leo;Lantz,Kristina;Stuber,Tod;Hicks,Jessica;Norris,Cameron
EPI2473570	PA	United States	2022-May-23	EPI_ISL_17260674	A/red fox/North Dakota/22-017061-002/2022	National Veterinary Services Laboratories - USDA	National Veterinary Services Laboratories - USDA	Chinh,Thanh;Franzen,Kerrie;Love,Emily;Killian,Mary;Koster,Leo;Lantz,Kristina;Stuber,Tod;Hicks,Jessica;Norris,Cameron
EPI2473556	PA	United States	2022-May-23	EPI_ISL_17260673	A/red fox/North Dakota/22-017061-001/2022	National Veterinary Services Laboratories - USDA	National Veterinary Services Laboratories - USDA	Chinh,Thanh;Franzen,Kerrie;Love,Emily;Killian,Mary;Koster,Leo;Lantz,Kristina;Stuber,Tod;Hicks,Jessica;Norris,Cameron
EPI2473542	PA	United States	2022-Jan-01	EPI_ISL_17260672	A/red fox/Minnesota/22-017056-001/2022	National Veterinary Services Laboratories - USDA	National Veterinary Services Laboratories - USDA	Chinh,Thanh;Franzen,Kerrie;Love,Emily;Killian,Mary;Koster,Leo;Lantz,Kristina;Stuber,Tod;Hicks,Jessica;Norris,Cameron
EPI2473514	PA	United States	2022-May-24	EPI_ISL_17260670	A/fox/Utah/22-016402-001/2022	National Veterinary Services Laboratories - USDA	National Veterinary Services Laboratories - USDA	Chinh,Thanh;Franzen,Kerrie;Love,Emily;Killian,Mary;Koster,Leo;Lantz,Kristina;Stuber,Tod;Hicks,Jessica;Norris,Cameron
EPI2473500	PA	United States	2022-May-10	EPI_ISL_17260669	A/red fox/Alaska/22-016300-001/2022	National Veterinary Services Laboratories - USDA	National Veterinary Services Laboratories - USDA	Chinh,Thanh;Franzen,Kerrie;Love,Emily;Killian,Mary;Koster,Leo;Lantz,Kristina;Stuber,Tod;Hicks,Jessica;Norris,Cameron
EPI2473474	PA	United States	2022-May-06	EPI_ISL_17260667	A/fox/Wisconsin/22-014746-026/2022	National Veterinary Services Laboratories - USDA	National Veterinary Services Laboratories - USDA	Chinh,Thanh;Franzen,Kerrie;Love,Emily;Killian,Mary;Koster,Leo;Lantz,Kristina;Stuber,Tod;Hicks,Jessica;Norris,Cameron
EPI2473461	PA	United States	2022-May-06	EPI_ISL_17260666	A/fox/Wisconsin/22-014746-021/2022	National Veterinary Services Laboratories - USDA	National Veterinary Services Laboratories - USDA	Chinh,Thanh;Franzen,Kerrie;Love,Emily;Killian,Mary;Koster,Leo;Lantz,Kristina;Stuber,Tod;Hicks,Jessica;Norris,Cameron
EPI2473447	PA	United States	2022-May-03	EPI_ISL_17260665	A/fox/Wisconsin/22-014746-015/2022	National Veterinary Services Laboratories - USDA	National Veterinary Services Laboratories - USDA	Chinh,Thanh;Franzen,Kerrie;Love,Emily;Killian,Mary;Koster,Leo;Lantz,Kristina;Stuber,Tod;Hicks,Jessica;Norris,Cameron
EPI2473434	PA	United States	2022-Apr-19	EPI_ISL_17260664	A/fox/Wisconsin/22-014746-007/2022	National Veterinary Services Laboratories - USDA	National Veterinary Services Laboratories - USDA	Chinh,Thanh;Franzen,Kerrie;Love,Emily;Killian,Mary;Koster,Leo;Lantz,Kristina;Stuber,Tod;Hicks,Jessica;Norris,Cameron
EPI2473420	PA	United States	2022-May-09	EPI_ISL_17260663	A/red fox/Minnesota/22-014661-002/2022	National Veterinary Services Laboratories - USDA	National Veterinary Services Laboratories - USDA	Chinh,Thanh;Franzen,Kerrie;Love,Emily;Killian,Mary;Koster,Leo;Lantz,Kristina;Stuber,Tod;Hicks,Jessica;Norris,Cameron
EPI2473407	PA	United States	2022-May-01	EPI_ISL_17260662	A/fox/Wisconsin/22-013774-013/2022	National Veterinary Services Laboratories - USDA	National Veterinary Services Laboratories - USDA	Chinh,Thanh;Franzen,Kerrie;Love,Emily;Killian,Mary;Koster,Leo;Lantz,Kristina;Stuber,Tod;Hicks,Jessica;Norris,Cameron
EPI2473393	PA	United States	2022-May-01	EPI_ISL_17260661	A/fox/Wisconsin/22-013774-008/2022	National Veterinary Services Laboratories - USDA	National Veterinary Services Laboratories - USDA	Chinh,Thanh;Franzen,Kerrie;Love,Emily;Killian,Mary;Koster,Leo;Lantz,Kristina;Stuber,Tod;Hicks,Jessica;Norris,Cameron
EPI2437464	PA	United Kingdom	2022-Aug-23	EPI_ISL_17072388	A/fox/England/015850/2022	Animal and Plant Health Agency (APHA)	Animal and Plant Health Agency (APHA)
EPI2274957	PA	Canada	2022-May-05	EPI_ISL_16367899	A/Red Fox/SK/FAV-0824-96/2022	Western College of Veterinary Medicine, University of Saskatchewan	Canadian Food Inspection Agency
EPI2259123	PA	United States	2022-Apr-27	EPI_ISL_16243273	A/fox/New York/22-015065-001/2022	National Veterinary Services Laboratories - USDA	National Veterinary Services Laboratories - USDA	Chinh,Thanh;Love, Emily;Franzen,Kerrie;Killian,Mary;Koster,Leo;Lantz,Kristina;Stuber,Tod;Hicks,Jessica
EPI2259115	PA	United States	2022-Apr-27	EPI_ISL_16243264	A/fox/New York/22-015064-001/2022	National Veterinary Services Laboratories - USDA	National Veterinary Services Laboratories - USDA	Chinh,Thanh;Love, Emily;Franzen,Kerrie;Killian,Mary;Koster,Leo;Lantz,Kristina;Stuber,Tod;Hicks,Jessica
EPI2259107	PA	United States	2022-Apr-15	EPI_ISL_16243253	A/fox/New York/22-015063-001/2022	National Veterinary Services Laboratories - USDA	National Veterinary Services Laboratories - USDA	Chinh,Thanh;Love, Emily;Franzen,Kerrie;Killian,Mary;Koster,Leo;Lantz,Kristina;Stuber,Tod;Hicks,Jessica
EPI2236545	PA	Canada	2022-May-19	EPI_ISL_16022233	A/Red Fox/SK/FAV-0548-03/2022	Western College of Veterinary Medicine, University of Saskatchewan	Canadian Food Inspection Agency	Alkie, Tamiru; Maria B, Araya; Xu, Wanhong; Hisanaga, Tamiko; Suderman, Suderman; Koziuk, Janice; Kruczkiewicz, Peter; Nguyen, Hoang Hai; Fisher, Mathew; Lung, Oliver; Berhane, Yohannes
EPI2236532	PA	Canada	2022-Jun-28	EPI_ISL_16021854	A/Red Fox/NS/FAV-0879/2022	Atlantic Veterinary College, University of Prince Edward Island	Canadian Food Inspection Agency	Alkie, Tamiru; Yason, Carmencita; Jones, E.B. Megan; Bourque, Laura; Xu, Wanhong; Hisanaga, Tamiko; Suderman, Suderman; Koziuk, Janice; Kruczkiewicz, Peter; Nguyen, Hoang Hai; Fisher, Mathew; Lung, Oliver; Berhane, Yohannes
EPI2236516	PA	Canada	2022-May-19	EPI_ISL_16021788	A/Red Fox/NS/FAV-0543/2022	Atlantic Veterinary College, University of Prince Edward Island	Canadian Food Inspection Agency	Alkie, Tamiru; Yason, Carmencita; Jones, E.B. Megan; Bourque, Laura; Xu, Wanhong; Hisanaga, Tamiko; Suderman, Suderman; Koziuk, Janice; Kruczkiewicz, Peter; Nguyen, Hoang Hai; Fisher, Mathew; Lung, Oliver; Berhane, Yohannes
EPI2236508	PA	Canada	2022-May-24	EPI_ISL_16021587	A/Red Fox/PEI/FAV-0591-02/2022	Atlantic Veterinary College, University of Prince Edward Island	Canadian Food Inspection Agency	Alkie, Tamiru; Yason, Carmencita; Jones, E.B. Megan; Bourque, Laura; Xu, Wanhong; Hisanaga, Tamiko; Suderman, Suderman; Koziuk, Janice; Kruczkiewicz, Peter; Nguyen, Hoang Hai; Fisher, Mathew; Lung, Oliver; Berhane, Yohannes
EPI2236231	PA	Canada	2022-Apr-12	EPI_ISL_16014112	A/Red Fox/ON/FAV-0300-01/2022	Ontario Veterinary College, University of Guelph	Canadian Food Inspection Agency	Alkie, Tamiru; Cox, Sherri; Ojkic, Davor; Stevens, Brian; Xu, Wanhong; Hisanaga, Tamiko; Suderman, Suderman; Koziuk, Janice; Kruczkiewicz, Peter; Nguyen, Hoang Hai; Fisher, Mathew; Lung, Oliver; Berhane, Yohannes
EPI2236223	PA	Canada	2022-Apr-03	EPI_ISL_16013993	A/Red Fox/ON/FAV-0873/2022	Ontario Veterinary College, University of Guelph	Canadian Food Inspection Agency	Alkie, Tamiru; Cox, Sherri; Ojkic, Davor; Stevens, Brian; Xu, Wanhong; Hisanaga, Tamiko; Suderman, Suderman; Koziuk, Janice; Kruczkiewicz, Peter; Nguyen, Hoang Hai; Fisher, Mathew; Lung, Oliver; Berhane, Yohannes
EPI2236215	PA	Canada	2022-May-31	EPI_ISL_16013990	A/Red Fox/ON/FAV-0773-01/2022	Ontario Veterinary College, University of Guelph	Canadian Food Inspection Agency	Alkie, Tamiru; Cox, Sherri; Ojkic, Davor; Stevens, Brian; Xu, Wanhong; Hisanaga, Tamiko; Suderman, Suderman; Koziuk, Janice; Kruczkiewicz, Peter; Nguyen, Hoang Hai; Fisher, Mathew; Lung, Oliver; Berhane, Yohannes
EPI2236207	PA	Canada	2022-May-11	EPI_ISL_16013987	A/Red Fox/ON/FAV-0529-03/2022	Ontario Veterinary College, University of Guelph	Canadian Food Inspection Agency	Alkie, Tamiru; Cox, Sherri; Ojkic, Davor; Stevens, Brian; Xu, Wanhong; Hisanaga, Tamiko; Suderman, Suderman; Koziuk, Janice; Kruczkiewicz, Peter; Nguyen, Hoang Hai; Fisher, Mathew; Lung, Oliver; Berhane, Yohannes
EPI2236199	PA	Canada	2022-May-19	EPI_ISL_16013986	A/Red Fox/ON/FAV-0529-02/2022	Ontario Veterinary College, University of Guelph	Canadian Food Inspection Agency	Alkie, Tamiru; Cox, Sherri; Ojkic, Davor; Stevens, Brian; Xu, Wanhong; Hisanaga, Tamiko; Suderman, Suderman; Koziuk, Janice; Kruczkiewicz, Peter; Nguyen, Hoang Hai; Fisher, Mathew; Lung, Oliver; Berhane, Yohannes
EPI2235607	PA	Canada	2022-May-05	EPI_ISL_16003281	A/Red Fox/ON/FAV-0605-03/2022	Ontario Veterinary College, University of Guelph	Canadian Food Inspection Agency	Alkie, Tamiru; Cox, Sherri; Ojkic, Davor; Stevens, Brian; Xu, Wanhong; Hisanaga, Tamiko; Suderman, Suderman; Koziuk, Janice; Kruczkiewicz, Peter; Nguyen, Hoang Hai; Fisher, Mathew; Lung, Oliver; Berhane, Yohannes
EPI2235599	PA	Canada	2022-Apr-27	EPI_ISL_16003275	A/Red Fox/ON/FAV-0605-01/2022	Ontario Veterinary College, University of Guelph	Canadian Food Inspection Agency	Alkie, Tamiru; Cox, Sherri; Ojkic, Davor; Stevens, Brian; Xu, Wanhong; Hisanaga, Tamiko; Suderman, Suderman; Koziuk, Janice; Kruczkiewicz, Peter; Nguyen, Hoang Hai; Fisher, Mathew; Lung, Oliver; Berhane, Yohannes
EPI2235591	PA	Canada	2022-May-05	EPI_ISL_16003270	A/Red Fox/ON/FAV-0605-02/2022	Ontario Veterinary College, University of Guelph	Canadian Food Inspection Agency	Alkie, Tamiru; Cox, Sherri; Ojkic, Davor; Stevens, Brian; Xu, Wanhong; Hisanaga, Tamiko; Suderman, Suderman; Koziuk, Janice; Kruczkiewicz, Peter; Nguyen, Hoang Hai; Fisher, Mathew; Lung, Oliver; Berhane, Yohannes
EPI2235575	PA	Canada	2022-May-09	EPI_ISL_16003267	A/Red Fox/MB/FAV-0414-12/2022	Manitoba Agriculture	Canadian Food Inspection Agency	Alkie, Tamiru; Cox, Sherri; Pople, Neil; Xu, Wanhong; Hisanaga, Tamiko; Suderman, Suderman; Koziuk, Janice; Kruczkiewicz, Peter; Nguyen, Hoang Hai; Fisher, Mathew; Lung, Oliver; Berhane, Yohannes
EPI2235567	PA	Canada	2022-May-09	EPI_ISL_16003266	A/Red Fox/MB/FAV-414-08/2022	Manitoba Agriculture	Canadian Food Inspection Agency	Alkie, Tamiru; Cox, Sherri; Pople, Neil; Xu, Wanhong; Hisanaga, Tamiko; Suderman, Suderman; Koziuk, Janice; Kruczkiewicz, Peter; Nguyen, Hoang Hai; Fisher, Mathew; Lung, Oliver; Berhane, Yohannes
EPI2235551	PA	Canada	2022-Apr-07	EPI_ISL_16003253	A/Red Fox/MB/FAV-370-01/2022	Manitoba Agriculture	Canadian Food Inspection Agency	Alkie, Tamiru; Cox, Sherri; Pople, Neil; Xu, Wanhong; Hisanaga, Tamiko; Suderman, Suderman; Koziuk, Janice; Kruczkiewicz, Peter; Nguyen, Hoang Hai; Fisher, Mathew; Lung, Oliver; Berhane, Yohannes
EPI2182123	PA	United States	2022-Jun-08	EPI_ISL_15078253	A/red fox/Michigan/22-018712-001/2022	National Veterinary Services Laboratories - USDA	National Veterinary Services Laboratories - USDA	Chinh,Thanh;Love, Emily;Franzen,Kerrie;Killian,Mary;Koster,Leo;Lantz,Kristina;Stuber,Tod;Hicks,Jessica
EPI2182107	PA	United States	2022-Jun-03	EPI_ISL_15078251	A/red fox/North Dakota/22-017354-001/2022	National Veterinary Services Laboratories - USDA	National Veterinary Services Laboratories - USDA	Chinh,Thanh;Love, Emily;Franzen,Kerrie;Killian,Mary;Koster,Leo;Lantz,Kristina;Stuber,Tod;Hicks,Jessica
EPI2182091	PA	United States	2022-May-13	EPI_ISL_15078249	A/fox/Minnesota/22-016487-001/2022	National Veterinary Services Laboratories - USDA	National Veterinary Services Laboratories - USDA	Chinh,Thanh;Love, Emily;Franzen,Kerrie;Killian,Mary;Koster,Leo;Lantz,Kristina;Stuber,Tod;Hicks,Jessica
EPI2182075	PA	United States	2022-May-06	EPI_ISL_15078247	A/fox/Wisconsin/22-014746-030/2022	National Veterinary Services Laboratories - USDA	National Veterinary Services Laboratories - USDA	Chinh,Thanh;Love, Emily;Franzen,Kerrie;Killian,Mary;Koster,Leo;Lantz,Kristina;Stuber,Tod;Hicks,Jessica
EPI2182067	PA	United States	2022-May-03	EPI_ISL_15078246	A/fox/Wisconsin/22-014746-008/2022	National Veterinary Services Laboratories - USDA	National Veterinary Services Laboratories - USDA	Chinh,Thanh;Love, Emily;Franzen,Kerrie;Killian,Mary;Koster,Leo;Lantz,Kristina;Stuber,Tod;Hicks,Jessica
EPI2182059	PA	United States	2022-Apr-22	EPI_ISL_15078245	A/fox/Michigan/22-014536-004/2022	National Veterinary Services Laboratories - USDA	National Veterinary Services Laboratories - USDA	Chinh,Thanh;Love, Emily;Franzen,Kerrie;Killian,Mary;Koster,Leo;Lantz,Kristina;Stuber,Tod;Hicks,Jessica
EPI2158628	PA	United Kingdom	2021-Dec-07	EPI_ISL_14864640	A/fox/England/M0025-12-21/2021	Animal and Plant Health Agency (APHA)	Animal and Plant Health Agency (APHA)
EPI2158612	PA	United Kingdom	2022-Mar-09	EPI_ISL_14864638	A/fox/England/M0083-03-22/2022	Animal and Plant Health Agency (APHA)	Animal and Plant Health Agency (APHA)
EPI2131405	PA	United States	2022-May-12	EPI_ISL_14553997	A/Vulpes vulpes/New_York/115912/2022	Cornell University	Cornell University	Diel, Diego G; Caserta, Leonardo Cardia; Cronk, Brittany D.
EPI2131384	PA	United States	2022-May-10	EPI_ISL_14553811	A/Vulpes vulpes/New_York/103994/2022	Cornell University	Cornell University
EPI2131376	PA	United States	2022-Apr-04	EPI_ISL_14553810	A/Vulpes vulpes/New_York/099488/2022	Cornell University	Cornell University	Diel, Diego G; Caserta, Leonardo Cardia; Cronk, Brittany D.
EPI2130813	PA	United States	2022-Apr-04	EPI_ISL_14533193	A/Vulpes vulpes/New_York/074441/2022	Cornell University	Cornell University	Diel,Diego G; Caserta,Leonardo Cardia; Cronk, Brittany D
EPI2129815	PA	Belgium	2022-Apr-16	EPI_ISL_14493899	A/Vulpes_vulpes/Belgium/8660_0016/2022	Sciensano - Animal Infectious Diseases	Sciensano, Department of Animal Infectious Diseases	Van Borm, Steven; Mathijs, Elisabeth; Roupie, Virginie; Vervaeke, Muriel; Lambrecht, Benedicte; Steensels, Mieke
EPI1945581	PA	Estonia	2021-Nov-08	EPI_ISL_7778880	A/Red_fox/Estonia/TA2126820_21VIR10433-13/2021	Estonian Veterinary and Food Laboratory	Istituto Zooprofilattico Sperimentale Delle Venezie	Nurmoja, I.; Vilem, A.; Juurik, T.; Zecchin, B.; Fusaro, A.; Schivo, A.; Salviato, A.; Palumbo, E.; Milani, A.; Giussani, E.; Pastori, A.; Monne, I.; Terregino, C.
EPI1859944	PA	Netherlands	2021-May-17	EPI_ISL_2194218	A/red fox/Netherlands/21028774-002/2021	Wageningen Bioveterinary Research	Wageningen Bioveterinary Research	Beerens, Nancy; Harders, Frank; Pritz-Verschuren, Sylvia; Roose, Marit; Germeraad, Evelien; Engelsma, Marc; Bossers, Alex; Heutink, Rene
EPI2914896	PA	Finland	2023-Aug-03	EPI_ISL_18764855	A/blue fox/Finland/UH-004-E1/2023	University of Helsinki, Department of Virology	Finnish Institute for Health and Welfare, THL	Altan, E ; Avelin, V; Lindh, E; Kakkola, L; Tammiranta, N; Nokireki, T; Gadd, T; Ikonen, N; Savolainen-Kopra, C; Sironen, T; √ñsterlund, P.
EPI2892567	PA	Finland	2023-Aug-01	EPI_ISL_18728100	A/arctic-fox/Finland/677/2023	Finnish Food Authority	Finnish Food Authority	Kauppinen, Ari; Kareinen, Lauri; Tammiranta, Niina; Kantala, Tuija; Fusaro, Alice; Giussani, Edoardo; Gadd, Tuija
EPI2794117	PA	Latvia	2023-May-25	EPI_ISL_18509071	A/fox/Latvia/34393_23VIR8835-1/2023	Institute of Food Safety, Animal Health and Environment "BIOR"	Istituto Zooprofilattico Sperimentale Delle Venezie	Krivko, L.; Pastori, A.; Zecchin, B.; Fusaro, A.; Schivo, A.; Salviato, A.; Palumbo, E.; Giussani, E.; Monne, I.; Terregino, C.
EPI2755722	PA	Finland	2023-Aug-21	EPI_ISL_18290490	A/arctic-fox/Finland/1909/2023	Finnish Food Authority	Finnish Food Authority	Kauppinen, Ari; Kareinen, Lauri; Tammiranta, Niina; Kantala, Tuija; Fusaro, Alice; Gadd, Tuija
EPI2755686	PA	Finland	2023-Aug-10	EPI_ISL_18290484	A/fox/Finland/1361/2023	Finnish Food Authority	Finnish Food Authority	Kauppinen, Ari; Kareinen, Lauri; Tammiranta, Niina; Kantala, Tuija; Fusaro, Alice; Gadd, Tuija
EPI2755671	PA	Finland	2023-Aug-10	EPI_ISL_18290482	A/arctic-fox/Finland/966/2023	Finnish Food Authority	Finnish Food Authority	Kauppinen, Ari; Kareinen, Lauri; Tammiranta, Niina; Kantala, Tuija; Fusaro, Alice; Gadd, Tuija
EPI2755663	PA	Finland	2023-Aug-07	EPI_ISL_18290481	A/arctic-fox/Finland/738/2023	Finnish Food Authority	Finnish Food Authority	Kauppinen, Ari; Kareinen, Lauri; Tammiranta, Niina; Kantala, Tuija; Fusaro, Alice; Gadd, Tuija
EPI2755625	PA	Finland	2023-Aug-09	EPI_ISL_18290476	A/arctic-fox/Finland/1086/2023	Finnish Food Authority	Finnish Food Authority	Kauppinen, Ari; Kareinen, Lauri; Tammiranta, Niina; Kantala, Tuija; Fusaro, Alice; Gadd, Tuija
EPI2755611	PA	Finland	2023-Aug-08	EPI_ISL_18290474	A/arctic-fox/Finland/783/2023	Finnish Food Authority	Finnish Food Authority	Kauppinen, Ari; Kareinen, Lauri; Tammiranta, Niina; Kantala, Tuija; Fusaro, Alice; Gadd, Tuija
EPI2755603	PA	Finland	2023-Aug-07	EPI_ISL_18290473	A/arctic-fox/Finland/736/2023	Finnish Food Authority	Finnish Food Authority	Kauppinen, Ari; Kareinen, Lauri; Tammiranta, Niina; Kantala, Tuija; Fusaro, Alice; Gadd, Tuija
EPI2755595	PA	Finland	2023-Aug-01	EPI_ISL_18290472	A/arctic-fox/Finland/674/2023	Finnish Food Authority	Finnish Food Authority	Kauppinen, Ari; Kareinen, Lauri; Tammiranta, Niina; Kantala, Tuija; Fusaro, Alice; Gadd, Tuija
EPI2755587	PA	Finland	2023-Aug-01	EPI_ISL_18290471	A/arctic-fox/Finland/673/2023	Finnish Food Authority	Finnish Food Authority	Kauppinen, Ari; Kareinen, Lauri; Tammiranta, Niina; Kantala, Tuija; Fusaro, Alice; Gadd, Tuija
EPI2755579	PA	Finland	2023-Jul-18	EPI_ISL_18290470	A/arctic-fox/Finland/578/2023	Finnish Food Authority	Finnish Food Authority	Kauppinen, Ari; Kareinen, Lauri; Tammiranta, Niina; Kantala, Tuija; Fusaro, Alice; Gadd, Tuija
EPI2755571	PA	Finland	2023-Jul-14	EPI_ISL_18290469	A/arctic-fox/Finland/545/2023	Finnish Food Authority	Finnish Food Authority	Kauppinen, Ari; Kareinen, Lauri; Tammiranta, Niina; Kantala, Tuija; Fusaro, Alice; Gadd, Tuija
EPI2641475	PA	Finland	2023-Jul-10	EPI_ISL_18011223	A/arctic-fox/Finland/504_23VIR6803-7/2023	Finnish Food Authority	Istituto Zooprofilattico Sperimentale Delle Venezie	Kantala, T.;Kauppinen, A.;Kareinen, L.;Gadd, T.;Galiano, M.;Ikonen, N.;Lindh, E.;Ormelli, S.;Varotto, M.;Zecchin, B.;Pastori, A.;Fusaro, A.;Zamperin, G.;Monne, I.;Terregino, C
EPI2641467	PA	Finland	2023-Jul-10	EPI_ISL_18011222	A/arctic-fox/Finland/497_23VIR6803-5/2023	Finnish Food Authority	Istituto Zooprofilattico Sperimentale Delle Venezie	Kantala, T.;Kauppinen, A.;Kareinen, L.;Gadd, T.;Galiano, M.;Ikonen, N.;Lindh, E.;Ormelli, S.;Varotto, M.;Zecchin, B.;Pastori, A.;Fusaro, A.;Zamperin, G.;Monne, I.;Terregino, C
EPI2559539	PA	Italy	2023-Apr-07	EPI_ISL_17679728	A/fox/Italy/23VIR3885-1/2023	Istituto Zooprofilattico Sperimentale delle Venezie, EU/OIE/Reference Laboratory and FAO Reference Centre for AI and ND	Istituto Zooprofilattico Sperimentale Delle Venezie	Pastori, A.; Zecchin, B.; Fusaro, A.; Schivo, A.; Salviato, A.; Palumbo, E.; Giussani, E.; Monne, I.; Terregino, C.
EPI2122956	PA	Netherlands	2022-Feb-15	EPI_ISL_14393126	A/Fox/Netherlands/EMC6/2022	Erasmus Medical Center	Erasmus Medical Center
EPI2122941	PA	Netherlands	2022-Apr-02	EPI_ISL_14393097	A/Fox/Netherlands/EMC4/2022	Erasmus Medical Center	Erasmus Medical Center
EPI2018064	PA	Netherlands	2022-Jan-26	EPI_ISL_12066188	A/Fox/Netherlands/EMC1/2022	Erasmus Medical Center	Erasmus Medical Center	R.A.M., Fouchier; S., Therwessen; O., Vuong; I., Chestakova; R., Sikkema; P., Lexmond; M., Pronk
EPI1995278	PA	Netherlands	2022-Feb-07	EPI_ISL_11019882	A/red fox/Netherlands/22002636-002/2022	Wageningen Bioveterinary Research	Wageningen Bioveterinary Research	Beerens, Nancy; Harders, Frank; Pritz-Verschuren, Sylvia; Roose, Marit; Venema, Sandra; Germeraad, Evelien; Engelsma, Marc; Heutink, Rene
EPI1995269	PA	Netherlands	2022-Jan-03	EPI_ISL_11019784	A/red fox/Netherlands/22000097-005/2022	Wageningen Bioveterinary Research	Wageningen Bioveterinary Research	Beerens, Nancy; Harders, Frank; Pritz-Verschuren, Sylvia; Roose, Marit; Venema, Sandra; Germeraad, Evelien; Engelsma, Marc; Heutink, Rene
EPI1988049	PA	Netherlands	2022-Feb-18	EPI_ISL_10454887	A/red fox/Netherlands/22003495-003/2022	Wageningen Bioveterinary Research	Wageningen Bioveterinary Research	Beerens, Nancy; Harders, Frank; Pritz-Verschuren, Sylvia; Roose, Marit; Venema, Sandra; Germeraad, Evelien; Engelsma, Marc; Heutink, Rene
EPI1987360	PA	Netherlands	2022-Feb-11	EPI_ISL_10255587	A/red fox/Netherlands/22002993-003 /2022	Wageningen Bioveterinary Research	Wageningen Bioveterinary Research	Beerens, Nancy; Harders, Frank; Pritz-Verschuren, Sylvia; Roose, Marit; Venema, Sandra; Germeraad, Evelien; Engelsma, Marc; Heutink, Rene
EPI1987352	PA	Netherlands	2022-Feb-11	EPI_ISL_10255581	A/red fox/Netherlands/22002992-003/2022	Wageningen Bioveterinary Research	Wageningen Bioveterinary Research	Beerens, Nancy; Harders, Frank; Pritz-Verschuren, Sylvia; Roose, Marit; Venema, Sandra; Germeraad, Evelien; Engelsma, Marc; Heutink, Rene
EPI1988016	PA	Netherlands	2021-Dec-03	EPI_ISL_7683138	A/red fox/Netherlands/21040099-007/2021	Wageningen Bioveterinary Research	Wageningen Bioveterinary Research	Beerens, Nancy; Harders, Frank; Pritz-Verschuren, Sylvia; Roose, Marit; Venema, Sandra; Germeraad, Evelien; Engelsma, Marc; Heutink, Rene
EPI1988008	PA	Netherlands	2021-Dec-03	EPI_ISL_7683137	A/red fox/Netherlands/21040099-006/2021	Wageningen Bioveterinary Research	Wageningen Bioveterinary Research	Beerens, Nancy; Harders, Frank; Pritz-Verschuren, Sylvia; Roose, Marit; Venema, Sandra; Germeraad, Evelien; Engelsma, Marc; Heutink, Rene
EPI1943561	PA	Netherlands	2021-Dec-03	EPI_ISL_7683118	A/red fox/Netherlands/21040099-001/2021	Wageningen Bioveterinary Research	Wageningen Bioveterinary Research	Beerens, Nancy; Harders, Frank; Pritz-Verschuren, Sylvia; Roose, Marit; Venema, Sandra; Germeraad, Evelien; Engelsma, Marc; Heutink, Rene
EPI3177563	PA	Germany	2023-Jun-12	EPI_ISL_19029378	A/Fox/Bavaria/i193/2023	Bayerisches Landesamt f√ºr Gesundheit und Lebensmittelsicherheit	Bayerisches Landesamt f√ºr Gesundheit und Lebensmittelsicherheit
EPI2730913	PA	United Kingdom	2023-Jul-26	EPI_ISL_18226744	A/red fox/Northern Ireland/22191/2023	AFBI - Agri-Food & Bioscience Institute	Agri-Food and Biosciences Institute (AFBINI)	Lagan, P.; Lemon, K.
EPI2730905	PA	United Kingdom	2023-Jul-26	EPI_ISL_18226743	A/red fox/Northern Ireland/22185/2023	AFBI - Agri-Food & Bioscience Institute	Agri-Food and Biosciences Institute (AFBINI)	Lagan, P.; Lemon, K.
EPI2697662	PA	Finland	2023-Jul-24	EPI_ISL_18123935	A/arctic-fox/Finland/615/2023	Finnish Food Authority	Finnish Institute for Health and Welfare, THL	Tuija Kantala, Alice Fusaro, Tuija Gadd, Monica Gallo, Niina Ikonen, Lauri Kareinen, Ari Kauppinen, Niina Tammiranta, Erika Lindh
EPI2697654	PA	Finland	2023-Jul-24	EPI_ISL_18123934	A/arctic-fox/Finland/614/2023	Finnish Food Authority	Finnish Institute for Health and Welfare, THL	Tuija Kantala, Alice Fusaro, Tuija Gadd, Monica Gallo, Niina Ikonen, Lauri Kareinen, Ari Kauppinen, Niina Tammiranta, Erika Lindh
EPI2697646	PA	Finland	2023-Jul-24	EPI_ISL_18123933	A/arctic-fox/Finland/613/2023	Finnish Food Authority	Finnish Institute for Health and Welfare, THL	Tuija Kantala, Alice Fusaro, Tuija Gadd, Monica Gallo, Niina Ikonen, Lauri Kareinen, Ari Kauppinen, Niina Tammiranta, Erika Lindh
EPI2697630	PA	Finland	2023-Jul-20	EPI_ISL_18123931	A/fox/Finland/602/2023	Finnish Food Authority	Finnish Institute for Health and Welfare, THL	Tuija Kantala, Alice Fusaro, Tuija Gadd, Monica Gallo, Niina Ikonen, Lauri Kareinen, Ari Kauppinen, Niina Tammiranta, Erika Lindh
EPI2697498	PA	Finland	2023-Jul-17	EPI_ISL_18122445	A/red-fox/Finland/553/2023	Finnish Food Authority	Finnish Institute for Health and Welfare, THL	Tuija Kantala, Alice Fusaro, Tuija Gadd, Monica Gallo, Niina Ikonen, Lauri Kareinen, Ari Kauppinen, Niina Tammiranta, Erika Lindh
EPI2697484	PA	Finland	2023-Jul-24	EPI_ISL_18122443	A/fox/Finland/612/2023	Finnish Food Authority	Finnish Institute for Health and Welfare, THL	Tuija Kantala, Alice Fusaro, Tuija Gadd, Monica Gallo, Niina Ikonen, Lauri Kareinen, Ari Kauppinen, Niina Tammiranta, Erika Lindh
EPI2697476	PA	Finland	2023-Jul-20	EPI_ISL_18122442	A/fox/Finland/603/2023	Finnish Food Authority	Finnish Institute for Health and Welfare, THL	Tuija Kantala, Alice Fusaro, Tuija Gadd, Monica Gallo, Niina Ikonen, Lauri Kareinen, Ari Kauppinen, Niina Tammiranta, Erika Lindh
EPI2697468	PA	Finland	2023-Jul-20	EPI_ISL_18122441	A/fox/Finland/601/2023	Finnish Food Authority	Finnish Institute for Health and Welfare, THL	Tuija Kantala, Alice Fusaro, Tuija Gadd, Monica Gallo, Niina Ikonen, Lauri Kareinen, Ari Kauppinen, Niina Tammiranta, Erika Lindh
EPI2697460	PA	Finland	2023-Jul-24	EPI_ISL_18122440	A/arctic-fox/Finland/622/2023	Finnish Food Authority	Finnish Institute for Health and Welfare, THL	Tuija Kantala, Alice Fusaro, Tuija Gadd, Monica Gallo, Niina Ikonen, Lauri Kareinen, Ari Kauppinen, Niina Tammiranta, Erika Lindh
EPI2697452	PA	Finland	2023-Jul-24	EPI_ISL_18122439	A/arctic-fox/Finland/621/2023	Finnish Food Authority	Finnish Institute for Health and Welfare, THL	Tuija Kantala, Alice Fusaro, Tuija Gadd, Monica Gallo, Niina Ikonen, Lauri Kareinen, Ari Kauppinen, Niina Tammiranta, Erika Lindh
EPI2697444	PA	Finland	2023-Jul-24	EPI_ISL_18122438	A/arctic-fox/Finland/620/2023	Finnish Food Authority	Finnish Institute for Health and Welfare, THL	Tuija Kantala, Alice Fusaro, Tuija Gadd, Monica Gallo, Niina Ikonen, Lauri Kareinen, Ari Kauppinen, Niina Tammiranta, Erika Lindh
EPI2697436	PA	Finland	2023-Jul-24	EPI_ISL_18122437	A/arctic-fox/Finland/619/2023	Finnish Food Authority	Finnish Institute for Health and Welfare, THL	Tuija Kantala, Alice Fusaro, Tuija Gadd, Monica Gallo, Niina Ikonen, Lauri Kareinen, Ari Kauppinen, Niina Tammiranta, Erika Lindh
EPI2697428	PA	Finland	2023-Jul-24	EPI_ISL_18122436	A/arctic-fox/Finland/618/2023	Finnish Food Authority	Finnish Institute for Health and Welfare, THL	Tuija Kantala, Alice Fusaro, Tuija Gadd, Monica Gallo, Niina Ikonen, Lauri Kareinen, Ari Kauppinen, Niina Tammiranta, Erika Lindh
EPI2697420	PA	Finland	2023-Jul-24	EPI_ISL_18122435	A/arctic-fox/Finland/616/2023	Finnish Food Authority	Finnish Institute for Health and Welfare, THL	Tuija Kantala, Alice Fusaro, Tuija Gadd, Monica Gallo, Niina Ikonen, Lauri Kareinen, Ari Kauppinen, Niina Tammiranta, Erika Lindh
EPI2697405	PA	Finland	2023-Jul-18	EPI_ISL_18122433	A/arctic-fox/Finland/577/2023	Finnish Food Authority	Finnish Institute for Health and Welfare, THL	Tuija Kantala, Alice Fusaro, Tuija Gadd, Monica Gallo, Niina Ikonen, Lauri Kareinen, Ari Kauppinen, Niina Tammiranta, Erika Lindh
EPI2697397	PA	Finland	2023-Jul-18	EPI_ISL_18122432	A/arctic-fox/Finland/576/2023	Finnish Food Authority	Finnish Institute for Health and Welfare, THL	Tuija Kantala, Alice Fusaro, Tuija Gadd, Monica Gallo, Niina Ikonen, Lauri Kareinen, Ari Kauppinen, Niina Tammiranta, Erika Lindh
EPI2697389	PA	Finland	2023-Jul-18	EPI_ISL_18122431	A/arctic-fox/Finland/575/2023	Finnish Food Authority	Finnish Institute for Health and Welfare, THL	Tuija Kantala, Alice Fusaro, Tuija Gadd, Monica Gallo, Niina Ikonen, Lauri Kareinen, Ari Kauppinen, Niina Tammiranta, Erika Lindh
EPI2697381	PA	Finland	2023-Jul-18	EPI_ISL_18122430	A/arctic-fox/Finland/574/2023	Finnish Food Authority	Finnish Institute for Health and Welfare, THL	Tuija Kantala, Alice Fusaro, Tuija Gadd, Monica Gallo, Niina Ikonen, Lauri Kareinen, Ari Kauppinen, Niina Tammiranta, Erika Lindh
EPI2697373	PA	Finland	2023-Jul-17	EPI_ISL_18122429	A/arctic-fox/Finland/567/2023	Finnish Food Authority	Finnish Institute for Health and Welfare, THL	Tuija Kantala, Alice Fusaro, Tuija Gadd, Monica Gallo, Niina Ikonen, Lauri Kareinen, Ari Kauppinen, Niina Tammiranta, Erika Lindh
EPI2697358	PA	Finland	2023-Jul-17	EPI_ISL_18122427	A/arctic-fox/Finland/565/2023	Finnish Food Authority	Finnish Institute for Health and Welfare, THL	Tuija Kantala, Alice Fusaro, Tuija Gadd, Monica Gallo, Niina Ikonen, Lauri Kareinen, Ari Kauppinen, Niina Tammiranta, Erika Lindh
EPI2697350	PA	Finland	2023-Jul-14	EPI_ISL_18122426	A/arctic-fox/Finland/549/2023	Finnish Food Authority	Finnish Institute for Health and Welfare, THL	Tuija Kantala, Alice Fusaro, Tuija Gadd, Monica Gallo, Niina Ikonen, Lauri Kareinen, Ari Kauppinen, Niina Tammiranta, Erika Lindh
EPI2697334	PA	Finland	2023-Jul-14	EPI_ISL_18122424	A/arctic-fox/Finland/544/2023	Finnish Food Authority	Finnish Institute for Health and Welfare, THL	Tuija Kantala, Alice Fusaro, Tuija Gadd, Monica Gallo, Niina Ikonen, Lauri Kareinen, Ari Kauppinen, Niina Tammiranta, Erika Lindh
EPI2697326	PA	Finland	2023-Jul-14	EPI_ISL_18122423	A/arctic-fox/Finland/543/2023	Finnish Food Authority	Finnish Institute for Health and Welfare, THL	Tuija Kantala, Alice Fusaro, Tuija Gadd, Monica Gallo, Niina Ikonen, Lauri Kareinen, Ari Kauppinen, Niina Tammiranta, Erika Lindh
EPI2697317	PA	Finland	2023-Jul-14	EPI_ISL_18122422	A/arctic-fox/Finland/542/2023	Finnish Food Authority	Finnish Institute for Health and Welfare, THL	Tuija Kantala, Alice Fusaro, Tuija Gadd, Monica Gallo, Niina Ikonen, Lauri Kareinen, Ari Kauppinen, Niina Tammiranta, Erika Lindh
EPI2697309	PA	Finland	2023-Jul-14	EPI_ISL_18122421	A/arctic-fox/Finland/536/2023	Finnish Food Authority	Finnish Institute for Health and Welfare, THL	Tuija Kantala, Alice Fusaro, Tuija Gadd, Monica Gallo, Niina Ikonen, Lauri Kareinen, Ari Kauppinen, Niina Tammiranta, Erika Lindh
EPI2697301	PA	Finland	2023-Jul-10	EPI_ISL_18122420	A/arctic-fox/Finland/504/2023	Finnish Food Authority	Finnish Institute for Health and Welfare, THL	Tuija Kantala, Alice Fusaro, Tuija Gadd, Monica Gallo, Niina Ikonen, Lauri Kareinen, Ari Kauppinen, Niina Tammiranta, Erika Lindh
EPI2697286	PA	Finland	2023-Jul-10	EPI_ISL_18122418	A/arctic-fox/Finland/495/2023	Finnish Food Authority	Finnish Institute for Health and Welfare, THL	Tuija Kantala, Alice Fusaro, Tuija Gadd, Monica Gallo, Niina Ikonen, Lauri Kareinen, Ari Kauppinen, Niina Tammiranta, Erika Lindh
EPI2608635	PA	Germany	2023-Mar-29	EPI_ISL_17880914	A/Red fox/Germany/51023-261/2023	Lower Saxony State Office for Consumer Protection and Food Safety	Lower Saxony State Office for Consumer Protection & Food Safety
EPI2608618	PA	Germany	2023-Feb-09	EPI_ISL_17880911	A/Red fox/Germany/51023-124/2023	Lower Saxony State Office for Consumer Protection and Food Safety	Lower Saxony State Office for Consumer Protection & Food Safety
EPI2608594	PA	Germany	2023-Jan-31	EPI_ISL_17880908	A/Red fox/Germany/51023-113/2023	Lower Saxony State Office for Consumer Protection and Food Safety	Lower Saxony State Office for Consumer Protection & Food Safety
EPI2608563	PA	Germany	2023-Jan-09	EPI_ISL_17880904	A/Red fox/Germany/51023-60/2023	Lower Saxony State Office for Consumer Protection and Food Safety	Lower Saxony State Office for Consumer Protection & Food Safety
EPI2467144	PA	France	2023-Feb-10	EPI_ISL_17233302	A/fox/France/23P002844/2023	Anses (Ploufragan-Plouzan√©)	ANSES Agence Nationale De Securite Sanitaire De L‚Äôalimentation
EPI2297255	PA	Belgium	2022-Dec-08	EPI_ISL_16549380	A/Vulpes_vulpes/Belgium/14775-0001/2022	Sciensano - Animal Infectious Diseases	Sciensano, Department of Animal Infectious Diseases	Van Borm, Steven; Roupie, Virginie; Hostyn, Pierre; Lambrecht, Benedicte; Steensels, Mieke
EPI3073423	PA	Germany	2024-Jan-01	EPI_ISL_18937337	A/fox/Germany-BW/2024AI00417/2024	Friedrich-Loeffler-Institut	Friedrich-Loeffler-Institut
EPI2639289	PA	Japan	2023-Feb-20	EPI_ISL_17857959	A/Ezo red fox/Hokkaido/3/2023	Graduate School of Veterinary Medicine, Hokkaido University	Graduate School of Veterinary Medicine, Hokkaido University	Yoshihiro, Sakoda; Norikazu, Isoda; Takahiro, Hiono; Yik Lim, Hew; Tatsuru, Morita
EPI2585316	PA	Belgium	2023-Apr-24	EPI_ISL_17774571	A/Vulpes_Vulpes/Belgium/04018_0005/2023	Sciensano - Animal Infectious Diseases	Sciensano, Department of Animal Infectious Diseases	Van Borm, Steven; Roupie, Virginie; Hostyn, Pierre; Mathijs, Elisabeth; Lambrecht, Benedicte; Steensels, Mieke
EPI2585307	PA	Belgium	2023-Apr-24	EPI_ISL_17774570	A/Vulpes_Vulpes/Belgium/04016_0001/2023	Sciensano - Animal Infectious Diseases	Sciensano, Department of Animal Infectious Diseases	Van Borm, Steven; Roupie, Virginie; Hostyn, Pierre; Mathijs, Elisabeth; Lambrecht, Benedicte; Steensels, Mieke
EPI2585299	PA	Belgium	2023-Apr-14	EPI_ISL_17774358	A/Vulpes_Vulpes/Belgium/03704_0001/2023	Sciensano - Animal Infectious Diseases	Sciensano, Department of Animal Infectious Diseases	Van Borm, Steven; Roupie, Virginie; Hostyn, Pierre; Mathijs, Elisabeth; Lambrecht, Benedicte; Steensels, Mieke
EPI2585291	PA	Belgium	2023-Apr-14	EPI_ISL_17774357	A/Vulpes_Vulpes/Belgium/03703_0007/2023	Sciensano - Animal Infectious Diseases	Sciensano, Department of Animal Infectious Diseases	Van Borm, Steven; Roupie, Virginie; Hostyn, Pierre; Mathijs, Elisabeth; Lambrecht, Benedicte; Steensels, Mieke
EPI2585282	PA	Belgium	2023-Apr-14	EPI_ISL_17774308	A/Vulpes_Vulpes/Belgium/03703_0003/2023	Sciensano - Animal Infectious Diseases	Sciensano, Department of Animal Infectious Diseases	Van Borm, Steven; Roupie, Virginie; Hostyn, Pierre; Mathijs, Elisabeth; Lambrecht, Benedicte; Steensels, Mieke
EPI2585274	PA	Belgium	2023-Apr-14	EPI_ISL_17774224	A/Vulpes_Vulpes/Belgium/03703_0001/2023	Sciensano - Animal Infectious Diseases	Sciensano, Department of Animal Infectious Diseases	Van Borm, Steven; Roupie, Virginie; Hostyn, Pierre; Mathijs, Elisabeth; Lambrecht, Benedicte; Steensels, Mieke
EPI2584338	PA	Japan	2023-Apr-12	EPI_ISL_17766057	A/Ezo red fox/Hokkaido/2/2023	Graduate School of Veterinary Medicine, Hokkaido University	Graduate School of Veterinary Medicine, Hokkaido University	Yoshihiro,Sakoda; Norikazu,Isoda; Takahiro,Hiono; Yik Lim,Hew; Tatsuru,Morita
EPI2540296	PA	Belgium	2023-Feb-10	EPI_ISL_17606263	A/Vulpes_vulpes/Belgium/01295_0002/2023	Sciensano - Animal Infectious Diseases	Sciensano, Department of Animal Infectious Diseases	Van Borm, Steven; Roupie, Virginie; Hostyn, Pierre; Mathijs, Elisabeth; Lambrecht, Benedicte; Steensels, Mieke
EPI2499737	PA	Canada	2022-Apr-15	EPI_ISL_17393093	A/Red Fox/ON/FAV-0301-05/2022	Ontario Veterinary College, University of Guelph	Canadian Food Inspection Agency	Alkie, T; Ojkic, D; Stevens, B; Xu, W; Hisanaga, T; Koziuk, T; Fisher, M; Lung, O; Berhane, Y
EPI2259578	PA	Canada	2022-Apr-15	EPI_ISL_16248229	A/Red fox/ON/FAV-0301-05/2022	Ontario Veterinary College, University of Guelph	Canadian Food Inspection Agency	Alkie, Tamiru; Cox, Sherri; Ojkic, Davor; Stevens, Brian; Xu, Wanhong; Hisanaga, Tamiko; Suderman, Suderman; Koziuk, Janice; Kruczkiewicz, Peter; Nguyen, Hoang Hai; Fisher, Mathew; Lung, Oliver; Berhane, Yohannes
EPI2259570	PA	Canada	2022-May-24	EPI_ISL_16244526	A/Red fox/PEI/FAV-0592-01/2022	Atlantic Veterinary College, University of Prince Edward Island	Canadian Food Inspection Agency	Alkie, Tamiru; Yason, Carmencita; Jones, Megan E. B.; Bourque, Laura; Xu, Wanhong; Hisanaga, Tamiko; Suderman, Suderman; Koziuk, Janice; Kruczkiewicz, Peter; Nguyen, Hoang Hai; Fisher, Mathew; Lung, Oliver; Berhane, Yohannes
EPI2259315	PA	United States	2022-May-11	EPI_ISL_16243970	A/fox/Iowa/22-015357-002/2022	National Veterinary Services Laboratories - USDA	National Veterinary Services Laboratories - USDA	Chinh,Thanh;Love, Emily;Franzen,Kerrie;Killian,Mary;Koster,Leo;Lantz,Kristina;Stuber,Tod;Hicks,Jessica
EPI2258915	PA	United States	2022-Apr-22	EPI_ISL_16240637	A/fox/Michigan/22-014536-008/2022	National Veterinary Services Laboratories - USDA	National Veterinary Services Laboratories - USDA	Chinh,Thanh;Love, Emily;Franzen,Kerrie;Killian,Mary;Koster,Leo;Lantz,Kristina;Stuber,Tod;Hicks,Jessica
EPI2258907	PA	United States	2022-Apr-22	EPI_ISL_16240636	A/fox/Michigan/22-014536-007/2022	National Veterinary Services Laboratories - USDA	National Veterinary Services Laboratories - USDA	Chinh,Thanh;Love, Emily;Franzen,Kerrie;Killian,Mary;Koster,Leo;Lantz,Kristina;Stuber,Tod;Hicks,Jessica
EPI2258899	PA	United States	2022-Apr-22	EPI_ISL_16240635	A/fox/Michigan/22-014536-002/2022	National Veterinary Services Laboratories - USDA	National Veterinary Services Laboratories - USDA	Chinh,Thanh;Love, Emily;Franzen,Kerrie;Killian,Mary;Koster,Leo;Lantz,Kristina;Stuber,Tod;Hicks,Jessica
EPI2258891	PA	United States	2022-Apr-22	EPI_ISL_16240634	A/fox/Michigan/22-014536-001/2022	National Veterinary Services Laboratories - USDA	National Veterinary Services Laboratories - USDA	Chinh,Thanh;Love, Emily;Franzen,Kerrie;Killian,Mary;Koster,Leo;Lantz,Kristina;Stuber,Tod;Hicks,Jessica
EPI2236677	PA	Canada	2022-Jun-10	EPI_ISL_16023371	A/Red Fox/AB/FAV-0835-13/2022	Alberta Agriculture and Forestry, Government of Alberta	Canadian Food Inspection Agency	Alkie, Tamiru; Hicks, Mark; Pybuse, Margo J; Xu, Wanhong; Hisanaga, Tamiko; Suderman, Suderman; Koziuk, Janice; Kruczkiewicz, Peter; Nguyen, Hoang Hai; Fisher, Mathew; Lung, Oliver; Berhane, Yohannes
EPI2236669	PA	Canada	2022-May-05	EPI_ISL_16023370	A/Red Fox/AB/FAV-0835-02/2022	Alberta Agriculture and Forestry, Government of Alberta	Canadian Food Inspection Agency	Alkie, Tamiru; Hicks, Mark; Pybuse, Margo J; Xu, Wanhong; Hisanaga, Tamiko; Suderman, Suderman; Koziuk, Janice; Kruczkiewicz, Peter; Nguyen, Hoang Hai; Fisher, Mathew; Lung, Oliver; Berhane, Yohannes
EPI2236552	PA	Canada	2022-May-05	EPI_ISL_16023345	A/Red Fox/AB/FAV-0835-01/2022	Alberta Agriculture and Forestry, Government of Alberta	Canadian Food Inspection Agency	Alkie, Tamiru; Hicks, Mark; Pybuse, Margo; Xu, Wanhong; Hisanaga, Tamiko; Suderman, Suderman; Koziuk, Janice; Kruczkiewicz, Peter; Nguyen, Hoang Hai; Fisher, Mathew; Lung, Oliver; Berhane, Yohannes
EPI2236494	PA	Canada	2022-May-24	EPI_ISL_16020774	A/Red Fox/PEI/FAV-0591-01/2022	Atlantic Veterinary College, University of Prince Edward Island	Canadian Food Inspection Agency	Alkie, Tamiru; Yason, Carmencita; Jones, E.B. Megan; Bourque, Laura; Xu, Wanhong; Hisanaga, Tamiko; Suderman, Suderman; Koziuk, Janice; Kruczkiewicz, Peter; Nguyen, Hoang Hai; Fisher, Mathew; Lung, Oliver; Berhane, Yohannes
EPI2236486	PA	Canada	2022-May-19	EPI_ISL_16020773	A/Red Fox/PEI/FAV-0544/2022	Atlantic Veterinary College, University of Prince Edward Island	Canadian Food Inspection Agency	Alkie, Tamiru; Yason, Carmencita; Jones, E.B. Megan; Bourque, Laura; Xu, Wanhong; Hisanaga, Tamiko; Suderman, Suderman; Koziuk, Janice; Kruczkiewicz, Peter; Nguyen, Hoang Hai; Fisher, Mathew; Lung, Oliver; Berhane, Yohannes
EPI2236478	PA	Canada	2022-May-24	EPI_ISL_16020772	A/Red Fox/PEI/FAV-0592-02/2022	Atlantic Veterinary College, University of Prince Edward Island	Canadian Food Inspection Agency	Alkie, Tamiru; Yason, Carmencita; Jones, E.B. Megan; Bourque, Laura; Xu, Wanhong; Hisanaga, Tamiko; Suderman, Suderman; Koziuk, Janice; Kruczkiewicz, Peter; Nguyen, Hoang Hai; Fisher, Mathew; Lung, Oliver; Berhane, Yohannes
EPI2236767	PA	Canada	2022-Apr-22	EPI_ISL_16014529	A/Red Fox/ON/FAV-0558-02/2022	Ontario Veterinary College, University of Guelph	Canadian Food Inspection Agency	Alkie, Tamiru; Cox, Sherri; Ojkic, Davor; Stevens, Brian; Xu, Wanhong; Hisanaga, Tamiko; Suderman, Suderman; Koziuk, Janice; Kruczkiewicz, Peter; Nguyen, Hoang Hai; Fisher, Mathew; Lung, Oliver; Berhane, Yohannes
EPI2236291	PA	Canada	2022-Apr-22	EPI_ISL_16014527	A/Red Fox/ON/FAV-0558-01/2022	Ontario Veterinary College, University of Guelph	Canadian Food Inspection Agency	Alkie, Tamiru; Cox, Sherri; Ojkic, Davor; Stevens, Brian; Xu, Wanhong; Hisanaga, Tamiko; Suderman, Suderman; Koziuk, Janice; Kruczkiewicz, Peter; Nguyen, Hoang Hai; Fisher, Mathew; Lung, Oliver; Berhane, Yohannes
EPI2236255	PA	Canada	2022-Apr-16	EPI_ISL_16014448	A/Red Fox/ON/FAV-0531/2022	Ontario Veterinary College, University of Guelph	Canadian Food Inspection Agency	Alkie, Tamiru; Cox, Sherri; Ojkic, Davor; Stevens, Brian; Xu, Wanhong; Hisanaga, Tamiko; Suderman, Suderman; Koziuk, Janice; Kruczkiewicz, Peter; Nguyen, Hoang Hai; Fisher, Mathew; Lung, Oliver; Berhane, Yohannes
EPI2236247	PA	Canada	2022-Apr-13	EPI_ISL_16014445	A/Red Fox/ON/FAV-0300-06/2022	Ontario Veterinary College, University of Guelph	Canadian Food Inspection Agency	Alkie, Tamiru; Cox, Sherri; Ojkic, Davor; Stevens, Brian; Xu, Wanhong; Hisanaga, Tamiko; Suderman, Suderman; Koziuk, Janice; Kruczkiewicz, Peter; Nguyen, Hoang Hai; Fisher, Mathew; Lung, Oliver; Berhane, Yohannes
EPI2236239	PA	Canada	2022-Apr-22	EPI_ISL_16014368	A/Red Fox/ON/FAV-0300-05/2022	Ontario Veterinary College, University of Guelph	Canadian Food Inspection Agency	Alkie, Tamiru; Cox, Sherri; Ojkic, Davor; Stevens, Brian; Xu, Wanhong; Hisanaga, Tamiko; Suderman, Suderman; Koziuk, Janice; Kruczkiewicz, Peter; Nguyen, Hoang Hai; Fisher, Mathew; Lung, Oliver; Berhane, Yohannes
EPI2131370	PA	United States	2022-May-04	EPI_ISL_14552975	A/Vulpes vulpes/New_York/099451/2022	Cornell University	Cornell University	Diel, Diego G; Caserta, Leonardo Cardia; Cronk, Brittany D.
EPI2129831	PA	Belgium	2022-Jun-16	EPI_ISL_14494796	A/Vulpes_vulpes/Belgium/9031_0008/2022	Sciensano - Animal Infectious Diseases	Sciensano, Department of Animal Infectious Diseases	Van Borm, Steven; Mathijs, Elisabeth; Roupie, Virginie; Vervaeke, Muriel; Lambrecht, Benedicte; Steensels, Mieke
EPI2053949	PA	United States	2022-May-06	EPI_ISL_13052728	A/fox/Wisconsin/22-014746-029/2022	National Veterinary Services Laboratories - USDA	National Veterinary Services Laboratories - USDA	Chinh,Thanh;Franzen,Kerrie;Love, Emily;Killian,Mary;Koster,Leo;Lantz,Kristina;Stuber,Tod;Hicks,Jessica
EPI2053941	PA	United States	2022-May-06	EPI_ISL_13052727	A/fox/Wisconsin/22-014746-023/2022	National Veterinary Services Laboratories - USDA	National Veterinary Services Laboratories - USDA	Chinh,Thanh;Franzen,Kerrie;Love, Emily;Killian,Mary;Koster,Leo;Lantz,Kristina;Stuber,Tod;Hicks,Jessica
EPI2053933	PA	United States	2022-May-03	EPI_ISL_13052726	A/fox/Wisconsin/22-014746-016/2022	National Veterinary Services Laboratories - USDA	National Veterinary Services Laboratories - USDA	Chinh,Thanh;Franzen,Kerrie;Love, Emily;Killian,Mary;Koster,Leo;Lantz,Kristina;Stuber,Tod;Hicks,Jessica
EPI2053925	PA	United States	2022-May-03	EPI_ISL_13052725	A/fox/Wisconsin/22-014746-010/2022	National Veterinary Services Laboratories - USDA	National Veterinary Services Laboratories - USDA	Chinh,Thanh;Franzen,Kerrie;Love, Emily;Killian,Mary;Koster,Leo;Lantz,Kristina;Stuber,Tod;Hicks,Jessica
EPI2053917	PA	United States	2022-May-09	EPI_ISL_13052724	A/fox/Minnesota/22-014661-001/2022	National Veterinary Services Laboratories - USDA	National Veterinary Services Laboratories - USDA	Chinh,Thanh;Franzen,Kerrie;Love, Emily;Killian,Mary;Koster,Leo;Lantz,Kristina;Stuber,Tod;Hicks,Jessica
EPI2053909	PA	United States	2022-May-10	EPI_ISL_13052723	A/fox/Minnesota/22-014660-002/2022	National Veterinary Services Laboratories - USDA	National Veterinary Services Laboratories - USDA	Chinh,Thanh;Franzen,Kerrie;Love, Emily;Killian,Mary;Koster,Leo;Lantz,Kristina;Stuber,Tod;Hicks,Jessica
EPI2053901	PA	United States	2022-May-10	EPI_ISL_13052722	A/fox/Minnesota/22-014660-001/2022	National Veterinary Services Laboratories - USDA	National Veterinary Services Laboratories - USDA	Chinh,Thanh;Franzen,Kerrie;Love, Emily;Killian,Mary;Koster,Leo;Lantz,Kristina;Stuber,Tod;Hicks,Jessica
EPI2053893	PA	United States	2022-May-06	EPI_ISL_13052721	A/fox/Iowa/22-014421-001/2022	National Veterinary Services Laboratories - USDA	National Veterinary Services Laboratories - USDA	Chinh,Thanh;Franzen,Kerrie;Love, Emily;Killian,Mary;Koster,Leo;Lantz,Kristina;Stuber,Tod;Hicks,Jessica
EPI2053885	PA	United States	2022-Apr-22	EPI_ISL_13052720	A/fox/Minnesota/22-014182-001/2022	National Veterinary Services Laboratories - USDA	National Veterinary Services Laboratories - USDA	Chinh,Thanh;Franzen,Kerrie;Love, Emily;Killian,Mary;Koster,Leo;Lantz,Kristina;Stuber,Tod;Hicks,Jessica
EPI2053877	PA	United States	2022-May-01	EPI_ISL_13052719	A/fox/Wisconsin/22-013774-014/2022	National Veterinary Services Laboratories - USDA	National Veterinary Services Laboratories - USDA	Chinh,Thanh;Franzen,Kerrie;Love, Emily;Killian,Mary;Koster,Leo;Lantz,Kristina;Stuber,Tod;Hicks,Jessica
EPI2053869	PA	United States	2022-May-01	EPI_ISL_13052718	A/fox/Wisconsin/22-013774-009/2022	National Veterinary Services Laboratories - USDA	National Veterinary Services Laboratories - USDA	Chinh,Thanh;Franzen,Kerrie;Love, Emily;Killian,Mary;Koster,Leo;Lantz,Kristina;Stuber,Tod;Hicks,Jessica
EPI2053861	PA	United States	2022-May-01	EPI_ISL_13052717	A/fox/Wisconsin/22-013774-002/2022	National Veterinary Services Laboratories - USDA	National Veterinary Services Laboratories - USDA	Chinh,Thanh;Franzen,Kerrie;Love, Emily;Killian,Mary;Koster,Leo;Lantz,Kristina;Stuber,Tod;Hicks,Jessica
EPI2021931	PA	Japan	2022-Mar-31	EPI_ISL_12174842	A/Ezo red fox/Hokkaido/1/2022	Graduate School of Veterinary Medicine, Hokkaido University	Graduate School of Veterinary Medicine, Hokkaido University	Yoshihiro, SAKODA; Takahiro, HIONO; Norikazu, ISODA
EPI1998134	PA	Ireland	2022-Feb-14	EPI_ISL_11259283	A/fox/Ireland/3866_22VIR2064-1/2022	Central Veterinary Research Laboratory	Istituto Zooprofilattico Sperimentale delle Venezie	Byrne, C.; Garcia, K.; Cuartero, L.G.; Barbierato, G.; Zecchin, B.; Fusaro, A.; Schivo, A.; Salviato, A.; Palumbo, E.; Giussani, E.; Monne, I.; Terregino, C.
EPI3217372	PB1	Netherlands	2021-Dec-03	EPI_ISL_19057417	A/red fox/Netherlands/21040099-006_PB2K/2021	Wageningen Bioveterinary Research	Wageningen Bioveterinary Research	Beerens, Nancy; Harders, Frank; Pritz-Verschuren, Sylvia; Roose, Marit; Venema, Sandra; Germeraad, Evelien; Engelsma, Marc; Heutink, Rene
EPI3217364	PB1	Netherlands	2021-Dec-03	EPI_ISL_19057416	A/red fox/Netherlands/21040099-006_PB2E/2021	Wageningen Bioveterinary Research	Wageningen Bioveterinary Research	Beerens, Nancy; Harders, Frank; Pritz-Verschuren, Sylvia; Roose, Marit; Venema, Sandra; Germeraad, Evelien; Engelsma, Marc; Heutink, Rene
EPI2837086	PB1	Finland	2023-Aug-04	EPI_ISL_18618442	A/arctic-fox/Finland/682/2023	Finnish Food Authority	Finnish Food Authority	Kauppinen, Ari; Kareinen, Lauri; Tammiranta, Niina; Kantala, Tuija; Fusaro, Alice; Gadd, Tuija
EPI2760284	PB1	Finland	2023-Jul-10	EPI_ISL_18321745	A/arctic-fox/Finland/HVVI_503_23_23VIR6803-6/2023	Finnish Food Authority	Istituto Zooprofilattico Sperimentale Delle Venezie	Gadd, T.; Tammiranta, N; Kantala, K.; Nokireki, T.; Pastori, A.; Zecchin, B.; Fusaro, A.; Schivo, A.; Salviato, A.; Palumbo, E.; Giussani, E.; Monne, I.; Terregino, C.
EPI2760276	PB1	Finland	2023-Jul-06	EPI_ISL_18321744	A/arctic-fox/Finland/HVVI_491_23_23VIR6803-1/2023	Finnish Food Authority	Istituto Zooprofilattico Sperimentale Delle Venezie	Gadd, T.; Tammiranta, N; Kantala, K.; Nokireki, T.; Pastori, A.; Zecchin, B.; Fusaro, A.; Schivo, A.; Salviato, A.; Palumbo, E.; Giussani, E.; Monne, I.; Terregino, C.
EPI2760268	PB1	Finland	2023-Jul-06	EPI_ISL_18321743	A/arctic-fox/Finland/HVVI_492_23_23VIR6803-2/2023	Finnish Food Authority	Istituto Zooprofilattico Sperimentale Delle Venezie	Gadd, T.; Tammiranta, N; Kantala, K.; Nokireki, T.; Pastori, A.; Zecchin, B.; Fusaro, A.; Schivo, A.; Salviato, A.; Palumbo, E.; Giussani, E.; Monne, I.; Terregino, C.
EPI2755500	PB1	Finland	2023-Aug-04	EPI_ISL_18292963	A/arctic-fox/Finland/684/2023	Finnish Food Authority	Finnish Food Authority	Kauppinen, Ari; Kareinen, Lauri; Tammiranta, Niina; Kantala, Tuija; Fusaro, Alice; Giussani, Edoardo; Gadd, Tuija
EPI2755460	PB1	Finland	2023-Aug-01	EPI_ISL_18292958	A/arctic-fox/Finland/675/2023	Finnish Food Authority	Finnish Food Authority	Kauppinen, Ari; Kareinen, Lauri; Tammiranta, Niina; Kantala, Tuija; Fusaro, Alice; Giussani, Edoardo; Gadd, Tuija
EPI2755436	PB1	Finland	2023-Jul-31	EPI_ISL_18292955	A/arctic-fox/Finland/670/2023	Finnish Food Authority	Finnish Food Authority	Kauppinen, Ari; Kareinen, Lauri; Tammiranta, Niina; Kantala, Tuija; Fusaro, Alice; Galiano, Monica; Ikonen, Niina; Lindh, Erika; Gadd, Tuija
EPI2701781	PB1	Finland	2023-Aug-04	EPI_ISL_18131280	A/blue fox/Finland/2023AI06876_071/2023	University of Helsinki, Department of Virology	Friedrich-Loeffler-Institut
EPI2701773	PB1	Finland	2023-Aug-04	EPI_ISL_18131279	A/silver fox/Finland/2023AI06834_029/2023	University of Helsinki, Department of Virology	Friedrich-Loeffler-Institut
EPI2701765	PB1	Finland	2023-Aug-03	EPI_ISL_18131278	A/silver fox/Finland/2023AI06838_033/2023	University of Helsinki, Department of Virology	Friedrich-Loeffler-Institut
EPI2701757	PB1	Finland	2023-Aug-03	EPI_ISL_18131277	A/red fox/Finland/2023AI06879_074/2023	University of Helsinki, Department of Virology	Friedrich-Loeffler-Institut
EPI2701749	PB1	Finland	2023-Aug-03	EPI_ISL_18131276	A/blue fox/Finland/2023AI06820_015/2023	University of Helsinki, Department of Virology	Friedrich-Loeffler-Institut
EPI2235558	PB1	Canada	2022-May-09	EPI_ISL_16003265	A/Red Fox/MB/FAV-414-004/2022	Manitoba Agriculture	Canadian Food Inspection Agency	Alkie, Tamiru; Cox, Sherri; Pople, Neil; Xu, Wanhong; Hisanaga, Tamiko; Suderman, Suderman; Koziuk, Janice; Kruczkiewicz, Peter; Nguyen, Hoang Hai; Fisher, Mathew; Lung, Oliver; Berhane, Yohannes
EPI2197238	PB1	Finland	2021-Nov-01	EPI_ISL_15518271	A/red_fox/Finland/2891_21RS3535-1/2021	Finnish Food Authority	Istituto Zooprofilattico Sperimentale Delle Venezie	Tammiranta, N.;Kantala, T.;Laamanen, I.;Gadd, T.;Zecchin, B.;Fusaro, A.;Schivo, A.;Salviato, A.;Palumbo, E.;Milani, A.;Giussani, E.;Pastori, A.;Monne, I.;Terregino, C.
EPI2197214	PB1	Finland	2021-Sep-01	EPI_ISL_15518268	A/fox/Finland/2844_21VIR9619-1/2021	Finnish Food Authority	Istituto Zooprofilattico Sperimentale Delle Venezie	Tammiranta, N.;Kantala, T.;Laamanen, I.;Gadd, T.;Zecchin, B.;Fusaro, A.;Schivo, A.;Salviato, A.;Palumbo, E.;Giussani, E.;Pastori, A.;Monne, I.;Terregino, C.
EPI2131356	PB1	United States	2022-Apr-25	EPI_ISL_14551957	A/Vulpes vulpes/New_York/088592/2022	Cornell University	Cornell University	Diel, Diego G; Caserta, Leonardo Cardia; Cronk, Brittany D.
EPI2018081	PB1	Netherlands	2022-Jan-22	EPI_ISL_12069289	A/Fox/Netherlands/EMC3/2022	Erasmus Medical Center	Erasmus Medical Center	R.A.M., Fouchier; S., Thewessen; O., Vuong; I., Chestakova; R., Sikkema; P., Lexmond; M., Pronk
EPI2018073	PB1	Netherlands	2022-Jan-10	EPI_ISL_12069288	A/Fox/Netherlands/EMC2/2022	Erasmus Medical Center	Erasmus Medical Center	R.A.M., Fouchier; S., Thewessen; O., Vuong; I., Chestakova; R., Sikkema; P., Lexmond; M., Pronk
EPI1994444	PB1	Netherlands	2022-Mar-01	EPI_ISL_10915976	A/red fox/Netherlands/22004172-003/2022	Wageningen Bioveterinary Research	Wageningen Bioveterinary Research	Beerens, Nancy; Harders, Frank; Pritz-Verschuren, Sylvia; Roose, Marit; Venema, Sandra; Germeraad, Evelien; Engelsma, Marc; Heutink, Rene
EPI1987224	PB1	Netherlands	2022-Feb-08	EPI_ISL_10220428	A/red fox/Netherlands/22002722-004/2022	Wageningen Bioveterinary Research	Wageningen Bioveterinary Research	Beerens, Nancy; Harders, Frank; Pritz-Verschuren, Sylvia; Roose, Marit; Venema, Sandra; Germeraad, Evelien; Engelsma, Marc; Heutink, Rene
EPI1987216	PB1	Netherlands	2022-Feb-07	EPI_ISL_10220427	A/red fox/Netherlands/22002636-005/2022	Wageningen Bioveterinary Research	Wageningen Bioveterinary Research	Beerens, Nancy; Harders, Frank; Pritz-Verschuren, Sylvia; Roose, Marit; Venema, Sandra; Germeraad, Evelien; Engelsma, Marc; Heutink, Rene
EPI1981018	PB1	Netherlands	2022-Jan-31	EPI_ISL_9616272	A/red fox/Netherlands/22002191-003/2022	Wageningen Bioveterinary Research	Wageningen Bioveterinary Research	Beerens, Nancy; Harders, Frank; Pritz-Verschuren, Sylvia; Roose, Marit; Venema, Sandra; Germeraad, Evelien; Engelsma, Marc; Heutink, Rene
EPI1981010	PB1	Netherlands	2022-Jan-31	EPI_ISL_9616271	A/red fox/Netherlands/22002190-003/2022	Wageningen Bioveterinary Research	Wageningen Bioveterinary Research	Beerens, Nancy; Harders, Frank; Pritz-Verschuren, Sylvia; Roose, Marit; Venema, Sandra; Germeraad, Evelien; Engelsma, Marc; Heutink, Rene
EPI1980994	PB1	Netherlands	2022-Jan-27	EPI_ISL_9616265	A/red fox/Netherlands/22001901-005/2022	Wageningen Bioveterinary Research	Wageningen Bioveterinary Research	Beerens, Nancy; Harders, Frank; Pritz-Verschuren, Sylvia; Roose, Marit; Venema, Sandra; Germeraad, Evelien; Engelsma, Marc; Heutink, Rene
EPI1956638	PB1	Netherlands	2022-Jan-03	EPI_ISL_8650947	A/red fox/Netherlands/22000097-004/2022	Wageningen Bioveterinary Research	Wageningen Bioveterinary Research	Beerens, Nancy; Harders, Frank; Pritz-Verschuren, Sylvia; Roose, Marit; Venema, Sandra; Germeraad, Evelien; Engelsma, Marc; Heutink, Rene
EPI1859951	PB1	Netherlands	2021-May-17	EPI_ISL_2194219	A/red fox/Netherlands/21028774-004/2021	Wageningen Bioveterinary Research	Wageningen Bioveterinary Research	Beerens, Nancy; Harders, Frank; Pritz-Verschuren, Sylvia; Roose, Marit; Germeraad, Evelien; Engelsma, Marc; Bossers, Alex; Heutink, Rene
EPI2697616	PB1	Finland	2023-Jul-31	EPI_ISL_18123725	A/arctic-fox/Finland/660/2023	Finnish Food Authority	Finnish Institute for Health and Welfare, THL	Tuija Kantala, Alice Fusaro, Tuija Gadd, Monica Gallo, Niina Ikonen, Lauri Kareinen, Ari Kauppinen, Niina Tammiranta, Erika Lindh
EPI2697608	PB1	Finland	2023-Jul-27	EPI_ISL_18123724	A/arctic-fox/Finland/654/2023	Finnish Food Authority	Finnish Institute for Health and Welfare, THL	Tuija Kantala, Alice Fusaro, Tuija Gadd, Monica Gallo, Niina Ikonen, Lauri Kareinen, Ari Kauppinen, Niina Tammiranta, Erika Lindh
EPI2697593	PB1	Finland	2023-Jul-17	EPI_ISL_18123722	A/arctic-fox/Finland/564/2023	Finnish Food Authority	Finnish Institute for Health and Welfare, THL	Tuija Kantala, Alice Fusaro, Tuija Gadd, Monica Gallo, Niina Ikonen, Lauri Kareinen, Ari Kauppinen, Niina Tammiranta, Erika Lindh
EPI2468401	PB1	Belgium	2023-Mar-02	EPI_ISL_17245141	A/Vulpes_vulpes/Belgium/01924_0003/2023	Sciensano - Animal Infectious Diseases	Sciensano, Department of Animal Infectious Diseases	Van Borm, Steven; Roupie, Virginie; Hostyn, Pierre; Mathijs, Elisabeth; Lambrecht, Benedicte; Steensels, Mieke
EPI2468394	PB1	Belgium	2023-Feb-27	EPI_ISL_17245099	A/Vulpes_vulpes/Belgium/01784_0010/2023	Sciensano - Animal Infectious Diseases	Sciensano, Department of Animal Infectious Diseases	Van Borm, Steven; Roupie, Virginie; Hostyn, Pierre; Mathijs, Elisabeth; Lambrecht, Benedicte; Steensels, Mieke
EPI2468386	PB1	Belgium	2023-Feb-27	EPI_ISL_17245098	A/Vulpes_vulpes/Belgium/01784_0008/2023	Sciensano - Animal Infectious Diseases	Sciensano, Department of Animal Infectious Diseases	Van Borm, Steven; Roupie, Virginie; Hostyn, Pierre; Mathijs, Elisabeth; Lambrecht, Benedicte; Steensels, Mieke
EPI2468378	PB1	Belgium	2023-Feb-27	EPI_ISL_17244973	A/Vulpes_vulpes/Belgium/01784_0004/2023	Sciensano - Animal Infectious Diseases	Sciensano, Department of Animal Infectious Diseases	Van Borm, Steven; Roupie, Virginie; Hostyn, Pierre; Mathijs, Elisabeth; Lambrecht, Benedicte; Steensels, Mieke
EPI2856933	PB1	Canada	2023-Aug-22	EPI_ISL_18665627	A/Red_Fox/BC/AIVPHL-1286/2023	B.C. Centre for Disease Control	Public Health Agency of Canada	Himsworth, Chelsea; Prystajecky,Natalie; Tyson,John; Jassem,Agatha; Kuchinski,Kevin; Coombe, Michelle; Lee,Tracy; Azana,Rob; Fung,Janet; Chan,Michael; Cheung,Branco; Caleta,Jessica; Tsang,Frankie; Yang,Kevin; Russell,Shannon; Zlosnik,James; Hoang,Linda
EPI2782083	PB1	Norway	2022-Jul-26	EPI_ISL_18455203	A/Red_fox/Norway/2022-07-1768-2T/2022	Norwegian Veterinary Institute	Norwegian Veterinary Institute	Britt Gjerset, Cathrine Arnason B√∏e
EPI2677002	PB1	United States	2022-May-27	EPI_ISL_18090482	A/red fox/Michigan/22-018712-003/2022	National Veterinary Services Laboratories - USDA	National Veterinary Services Laboratories - USDA	Chinh,Thanh;Franzen,Kerrie;Love,Emily;Ozella,Mikaela;Killian,Mary;Lantz,Kristina;Stuber,Tod;Hicks,Jessica;Norris,Cameron
EPI2540330	PB1	Belgium	2023-Mar-29	EPI_ISL_17606758	A/Vulpes_vulpes/Belgium/03117_0004/2023	Sciensano - Animal Infectious Diseases	Sciensano, Department of Animal Infectious Diseases	Van Borm, Steven; Roupie, Virginie; Hostyn, Pierre; Mathijs, Elisabeth; Lambrecht, Benedicte; Steensels, Mieke
EPI2540320	PB1	Belgium	2023-Mar-29	EPI_ISL_17606757	A/Vulpes_vulpes/Belgium/03117_0001/2023	Sciensano - Animal Infectious Diseases	Sciensano, Department of Animal Infectious Diseases	Van Borm, Steven; Roupie, Virginie; Hostyn, Pierre; Mathijs, Elisabeth; Lambrecht, Benedicte; Steensels, Mieke
EPI2540312	PB1	Belgium	2023-Mar-14	EPI_ISL_17606756	A/Vulpes_vulpes/Belgium/02359_0006/2023	Sciensano - Animal Infectious Diseases	Sciensano, Department of Animal Infectious Diseases	Van Borm, Steven; Roupie, Virginie; Hostyn, Pierre; Mathijs, Elisabeth; Lambrecht, Benedicte; Steensels, Mieke
EPI2540303	PB1	Belgium	2023-Mar-14	EPI_ISL_17606755	A/Vulpes_vulpes/Belgium/02359_0002/2023	Sciensano - Animal Infectious Diseases	Sciensano, Department of Animal Infectious Diseases	Van Borm, Steven; Roupie, Virginie; Hostyn, Pierre; Mathijs, Elisabeth; Lambrecht, Benedicte; Steensels, Mieke
EPI2576155	PB1	Denmark	2022-Apr-28	EPI_ISL_17447440	A/red fox/Denmark/08658-3.02-2/2022	Statens Serumm Institute	Statens Serum Institute	Hjulsager,Charlotte;Liang,Yuan
EPI2576139	PB1	Denmark	2022-Apr-28	EPI_ISL_17447413	A/red fox/Denmark/08658-1.01/2022	Statens Serumm Institute	Statens Serum Institute	Hjulsager,Charlotte; Liang,Yuan
EPI2576131	PB1	Denmark	2022-Jan-17	EPI_ISL_17447412	A/red fox/Denmark/01679-1.01-2/2022	Statens Serum Institute	Statens Serum Institute	Hjulsager,Charlotte; Liang,Yuan
EPI2500047	PB1	Canada	2022-May-19	EPI_ISL_17394088	A/Red Fox/PEI/FAV-0544-P1/2022	Atlantic Veterinary College, University of Prince Edward Island	Canadian Food Inspection Agency	Alkie, T; Yason, C; Jones, M; Xu, W; Hisanaga, T; Koziuk, T; Fisher, M; Lung, O; Berhane, Y
EPI2473766	PB1	United States	2022-Jul-06	EPI_ISL_17260687	A/red fox/Michigan/22-021733-007/2022	National Veterinary Services Laboratories - USDA	National Veterinary Services Laboratories - USDA	Chinh,Thanh;Franzen,Kerrie;Love,Emily;Killian,Mary;Koster,Leo;Lantz,Kristina;Stuber,Tod;Hicks,Jessica;Norris,Cameron
EPI2473754	PB1	United States	2022-Jul-06	EPI_ISL_17260686	A/red fox/Michigan/22-021733-005/2022	National Veterinary Services Laboratories - USDA	National Veterinary Services Laboratories - USDA	Chinh,Thanh;Franzen,Kerrie;Love,Emily;Killian,Mary;Koster,Leo;Lantz,Kristina;Stuber,Tod;Hicks,Jessica;Norris,Cameron
EPI2473736	PB1	United States	2022-Jul-06	EPI_ISL_17260685	A/red fox/Michigan/22-021733-003/2022	National Veterinary Services Laboratories - USDA	National Veterinary Services Laboratories - USDA	Chinh,Thanh;Franzen,Kerrie;Love,Emily;Killian,Mary;Koster,Leo;Lantz,Kristina;Stuber,Tod;Hicks,Jessica;Norris,Cameron
EPI2473717	PB1	United States	2022-Jul-06	EPI_ISL_17260684	A/red fox/Michigan/22-021733-002/2022	National Veterinary Services Laboratories - USDA	National Veterinary Services Laboratories - USDA	Chinh,Thanh;Franzen,Kerrie;Love,Emily;Killian,Mary;Koster,Leo;Lantz,Kristina;Stuber,Tod;Hicks,Jessica;Norris,Cameron
EPI2473671	PB1	United States	2022-Jun-15	EPI_ISL_17260681	A/red fox/Alaska/22-019272-001/2022	National Veterinary Services Laboratories - USDA	National Veterinary Services Laboratories - USDA	Chinh,Thanh;Franzen,Kerrie;Love,Emily;Killian,Mary;Koster,Leo;Lantz,Kristina;Stuber,Tod;Hicks,Jessica;Norris,Cameron
EPI2473643	PB1	United States	2022-May-27	EPI_ISL_17260679	A/red fox/Michigan/22-018712-005/2022	National Veterinary Services Laboratories - USDA	National Veterinary Services Laboratories - USDA	Chinh,Thanh;Franzen,Kerrie;Love,Emily;Killian,Mary;Koster,Leo;Lantz,Kristina;Stuber,Tod;Hicks,Jessica;Norris,Cameron
EPI2473629	PB1	United States	2022-May-10	EPI_ISL_17260678	A/red fox/Michigan/22-017507-008/2022	National Veterinary Services Laboratories - USDA	National Veterinary Services Laboratories - USDA	Chinh,Thanh;Franzen,Kerrie;Love,Emily;Killian,Mary;Koster,Leo;Lantz,Kristina;Stuber,Tod;Hicks,Jessica;Norris,Cameron
EPI2473615	PB1	United States	2022-May-05	EPI_ISL_17260677	A/red fox/Michigan/22-017507-007/2022	National Veterinary Services Laboratories - USDA	National Veterinary Services Laboratories - USDA	Chinh,Thanh;Franzen,Kerrie;Love,Emily;Killian,Mary;Koster,Leo;Lantz,Kristina;Stuber,Tod;Hicks,Jessica;Norris,Cameron
EPI2473601	PB1	United States	2022-May-18	EPI_ISL_17260676	A/red fox/Michigan/22-017507-006/2022	National Veterinary Services Laboratories - USDA	National Veterinary Services Laboratories - USDA	Chinh,Thanh;Franzen,Kerrie;Love,Emily;Killian,Mary;Koster,Leo;Lantz,Kristina;Stuber,Tod;Hicks,Jessica;Norris,Cameron
EPI2473573	PB1	United States	2022-May-23	EPI_ISL_17260674	A/red fox/North Dakota/22-017061-002/2022	National Veterinary Services Laboratories - USDA	National Veterinary Services Laboratories - USDA	Chinh,Thanh;Franzen,Kerrie;Love,Emily;Killian,Mary;Koster,Leo;Lantz,Kristina;Stuber,Tod;Hicks,Jessica;Norris,Cameron
EPI2473559	PB1	United States	2022-May-23	EPI_ISL_17260673	A/red fox/North Dakota/22-017061-001/2022	National Veterinary Services Laboratories - USDA	National Veterinary Services Laboratories - USDA	Chinh,Thanh;Franzen,Kerrie;Love,Emily;Killian,Mary;Koster,Leo;Lantz,Kristina;Stuber,Tod;Hicks,Jessica;Norris,Cameron
EPI2473545	PB1	United States	2022-Jan-01	EPI_ISL_17260672	A/red fox/Minnesota/22-017056-001/2022	National Veterinary Services Laboratories - USDA	National Veterinary Services Laboratories - USDA	Chinh,Thanh;Franzen,Kerrie;Love,Emily;Killian,Mary;Koster,Leo;Lantz,Kristina;Stuber,Tod;Hicks,Jessica;Norris,Cameron
EPI2473517	PB1	United States	2022-May-24	EPI_ISL_17260670	A/fox/Utah/22-016402-001/2022	National Veterinary Services Laboratories - USDA	National Veterinary Services Laboratories - USDA	Chinh,Thanh;Franzen,Kerrie;Love,Emily;Killian,Mary;Koster,Leo;Lantz,Kristina;Stuber,Tod;Hicks,Jessica;Norris,Cameron
EPI2473503	PB1	United States	2022-May-10	EPI_ISL_17260669	A/red fox/Alaska/22-016300-001/2022	National Veterinary Services Laboratories - USDA	National Veterinary Services Laboratories - USDA	Chinh,Thanh;Franzen,Kerrie;Love,Emily;Killian,Mary;Koster,Leo;Lantz,Kristina;Stuber,Tod;Hicks,Jessica;Norris,Cameron
EPI2473477	PB1	United States	2022-May-06	EPI_ISL_17260667	A/fox/Wisconsin/22-014746-026/2022	National Veterinary Services Laboratories - USDA	National Veterinary Services Laboratories - USDA	Chinh,Thanh;Franzen,Kerrie;Love,Emily;Killian,Mary;Koster,Leo;Lantz,Kristina;Stuber,Tod;Hicks,Jessica;Norris,Cameron
EPI2473464	PB1	United States	2022-May-06	EPI_ISL_17260666	A/fox/Wisconsin/22-014746-021/2022	National Veterinary Services Laboratories - USDA	National Veterinary Services Laboratories - USDA	Chinh,Thanh;Franzen,Kerrie;Love,Emily;Killian,Mary;Koster,Leo;Lantz,Kristina;Stuber,Tod;Hicks,Jessica;Norris,Cameron
EPI2473450	PB1	United States	2022-May-03	EPI_ISL_17260665	A/fox/Wisconsin/22-014746-015/2022	National Veterinary Services Laboratories - USDA	National Veterinary Services Laboratories - USDA	Chinh,Thanh;Franzen,Kerrie;Love,Emily;Killian,Mary;Koster,Leo;Lantz,Kristina;Stuber,Tod;Hicks,Jessica;Norris,Cameron
EPI2473437	PB1	United States	2022-Apr-19	EPI_ISL_17260664	A/fox/Wisconsin/22-014746-007/2022	National Veterinary Services Laboratories - USDA	National Veterinary Services Laboratories - USDA	Chinh,Thanh;Franzen,Kerrie;Love,Emily;Killian,Mary;Koster,Leo;Lantz,Kristina;Stuber,Tod;Hicks,Jessica;Norris,Cameron
EPI2473423	PB1	United States	2022-May-09	EPI_ISL_17260663	A/red fox/Minnesota/22-014661-002/2022	National Veterinary Services Laboratories - USDA	National Veterinary Services Laboratories - USDA	Chinh,Thanh;Franzen,Kerrie;Love,Emily;Killian,Mary;Koster,Leo;Lantz,Kristina;Stuber,Tod;Hicks,Jessica;Norris,Cameron
EPI2473410	PB1	United States	2022-May-01	EPI_ISL_17260662	A/fox/Wisconsin/22-013774-013/2022	National Veterinary Services Laboratories - USDA	National Veterinary Services Laboratories - USDA	Chinh,Thanh;Franzen,Kerrie;Love,Emily;Killian,Mary;Koster,Leo;Lantz,Kristina;Stuber,Tod;Hicks,Jessica;Norris,Cameron
EPI2473396	PB1	United States	2022-May-01	EPI_ISL_17260661	A/fox/Wisconsin/22-013774-008/2022	National Veterinary Services Laboratories - USDA	National Veterinary Services Laboratories - USDA	Chinh,Thanh;Franzen,Kerrie;Love,Emily;Killian,Mary;Koster,Leo;Lantz,Kristina;Stuber,Tod;Hicks,Jessica;Norris,Cameron
EPI2437466	PB1	United Kingdom	2022-Aug-23	EPI_ISL_17072388	A/fox/England/015850/2022	Animal and Plant Health Agency (APHA)	Animal and Plant Health Agency (APHA)
EPI2398417	PB1	United Kingdom	2023-Jan-12	EPI_ISL_16904555	A/Red_Fox/Wales/017836/2023	Animal and Plant Health Agency (APHA)	Animal and Plant Health Agency (APHA)
EPI2274956	PB1	Canada	2022-May-05	EPI_ISL_16367899	A/Red Fox/SK/FAV-0824-96/2022	Western College of Veterinary Medicine, University of Saskatchewan	Canadian Food Inspection Agency
EPI2259125	PB1	United States	2022-Apr-27	EPI_ISL_16243273	A/fox/New York/22-015065-001/2022	National Veterinary Services Laboratories - USDA	National Veterinary Services Laboratories - USDA	Chinh,Thanh;Love, Emily;Franzen,Kerrie;Killian,Mary;Koster,Leo;Lantz,Kristina;Stuber,Tod;Hicks,Jessica
EPI2259117	PB1	United States	2022-Apr-27	EPI_ISL_16243264	A/fox/New York/22-015064-001/2022	National Veterinary Services Laboratories - USDA	National Veterinary Services Laboratories - USDA	Chinh,Thanh;Love, Emily;Franzen,Kerrie;Killian,Mary;Koster,Leo;Lantz,Kristina;Stuber,Tod;Hicks,Jessica
EPI2259109	PB1	United States	2022-Apr-15	EPI_ISL_16243253	A/fox/New York/22-015063-001/2022	National Veterinary Services Laboratories - USDA	National Veterinary Services Laboratories - USDA	Chinh,Thanh;Love, Emily;Franzen,Kerrie;Killian,Mary;Koster,Leo;Lantz,Kristina;Stuber,Tod;Hicks,Jessica
EPI2236544	PB1	Canada	2022-May-19	EPI_ISL_16022233	A/Red Fox/SK/FAV-0548-03/2022	Western College of Veterinary Medicine, University of Saskatchewan	Canadian Food Inspection Agency	Alkie, Tamiru; Maria B, Araya; Xu, Wanhong; Hisanaga, Tamiko; Suderman, Suderman; Koziuk, Janice; Kruczkiewicz, Peter; Nguyen, Hoang Hai; Fisher, Mathew; Lung, Oliver; Berhane, Yohannes
EPI2236527	PB1	Canada	2022-Jun-28	EPI_ISL_16021854	A/Red Fox/NS/FAV-0879/2022	Atlantic Veterinary College, University of Prince Edward Island	Canadian Food Inspection Agency	Alkie, Tamiru; Yason, Carmencita; Jones, E.B. Megan; Bourque, Laura; Xu, Wanhong; Hisanaga, Tamiko; Suderman, Suderman; Koziuk, Janice; Kruczkiewicz, Peter; Nguyen, Hoang Hai; Fisher, Mathew; Lung, Oliver; Berhane, Yohannes
EPI2236515	PB1	Canada	2022-May-19	EPI_ISL_16021788	A/Red Fox/NS/FAV-0543/2022	Atlantic Veterinary College, University of Prince Edward Island	Canadian Food Inspection Agency	Alkie, Tamiru; Yason, Carmencita; Jones, E.B. Megan; Bourque, Laura; Xu, Wanhong; Hisanaga, Tamiko; Suderman, Suderman; Koziuk, Janice; Kruczkiewicz, Peter; Nguyen, Hoang Hai; Fisher, Mathew; Lung, Oliver; Berhane, Yohannes
EPI2236507	PB1	Canada	2022-May-24	EPI_ISL_16021587	A/Red Fox/PEI/FAV-0591-02/2022	Atlantic Veterinary College, University of Prince Edward Island	Canadian Food Inspection Agency	Alkie, Tamiru; Yason, Carmencita; Jones, E.B. Megan; Bourque, Laura; Xu, Wanhong; Hisanaga, Tamiko; Suderman, Suderman; Koziuk, Janice; Kruczkiewicz, Peter; Nguyen, Hoang Hai; Fisher, Mathew; Lung, Oliver; Berhane, Yohannes
EPI2236230	PB1	Canada	2022-Apr-12	EPI_ISL_16014112	A/Red Fox/ON/FAV-0300-01/2022	Ontario Veterinary College, University of Guelph	Canadian Food Inspection Agency	Alkie, Tamiru; Cox, Sherri; Ojkic, Davor; Stevens, Brian; Xu, Wanhong; Hisanaga, Tamiko; Suderman, Suderman; Koziuk, Janice; Kruczkiewicz, Peter; Nguyen, Hoang Hai; Fisher, Mathew; Lung, Oliver; Berhane, Yohannes
EPI2236222	PB1	Canada	2022-Apr-03	EPI_ISL_16013993	A/Red Fox/ON/FAV-0873/2022	Ontario Veterinary College, University of Guelph	Canadian Food Inspection Agency	Alkie, Tamiru; Cox, Sherri; Ojkic, Davor; Stevens, Brian; Xu, Wanhong; Hisanaga, Tamiko; Suderman, Suderman; Koziuk, Janice; Kruczkiewicz, Peter; Nguyen, Hoang Hai; Fisher, Mathew; Lung, Oliver; Berhane, Yohannes
EPI2236214	PB1	Canada	2022-May-31	EPI_ISL_16013990	A/Red Fox/ON/FAV-0773-01/2022	Ontario Veterinary College, University of Guelph	Canadian Food Inspection Agency	Alkie, Tamiru; Cox, Sherri; Ojkic, Davor; Stevens, Brian; Xu, Wanhong; Hisanaga, Tamiko; Suderman, Suderman; Koziuk, Janice; Kruczkiewicz, Peter; Nguyen, Hoang Hai; Fisher, Mathew; Lung, Oliver; Berhane, Yohannes
EPI2236206	PB1	Canada	2022-May-11	EPI_ISL_16013987	A/Red Fox/ON/FAV-0529-03/2022	Ontario Veterinary College, University of Guelph	Canadian Food Inspection Agency	Alkie, Tamiru; Cox, Sherri; Ojkic, Davor; Stevens, Brian; Xu, Wanhong; Hisanaga, Tamiko; Suderman, Suderman; Koziuk, Janice; Kruczkiewicz, Peter; Nguyen, Hoang Hai; Fisher, Mathew; Lung, Oliver; Berhane, Yohannes
EPI2236198	PB1	Canada	2022-May-19	EPI_ISL_16013986	A/Red Fox/ON/FAV-0529-02/2022	Ontario Veterinary College, University of Guelph	Canadian Food Inspection Agency	Alkie, Tamiru; Cox, Sherri; Ojkic, Davor; Stevens, Brian; Xu, Wanhong; Hisanaga, Tamiko; Suderman, Suderman; Koziuk, Janice; Kruczkiewicz, Peter; Nguyen, Hoang Hai; Fisher, Mathew; Lung, Oliver; Berhane, Yohannes
EPI2235606	PB1	Canada	2022-May-05	EPI_ISL_16003281	A/Red Fox/ON/FAV-0605-03/2022	Ontario Veterinary College, University of Guelph	Canadian Food Inspection Agency	Alkie, Tamiru; Cox, Sherri; Ojkic, Davor; Stevens, Brian; Xu, Wanhong; Hisanaga, Tamiko; Suderman, Suderman; Koziuk, Janice; Kruczkiewicz, Peter; Nguyen, Hoang Hai; Fisher, Mathew; Lung, Oliver; Berhane, Yohannes
EPI2235598	PB1	Canada	2022-Apr-27	EPI_ISL_16003275	A/Red Fox/ON/FAV-0605-01/2022	Ontario Veterinary College, University of Guelph	Canadian Food Inspection Agency	Alkie, Tamiru; Cox, Sherri; Ojkic, Davor; Stevens, Brian; Xu, Wanhong; Hisanaga, Tamiko; Suderman, Suderman; Koziuk, Janice; Kruczkiewicz, Peter; Nguyen, Hoang Hai; Fisher, Mathew; Lung, Oliver; Berhane, Yohannes
EPI2235590	PB1	Canada	2022-May-05	EPI_ISL_16003270	A/Red Fox/ON/FAV-0605-02/2022	Ontario Veterinary College, University of Guelph	Canadian Food Inspection Agency	Alkie, Tamiru; Cox, Sherri; Ojkic, Davor; Stevens, Brian; Xu, Wanhong; Hisanaga, Tamiko; Suderman, Suderman; Koziuk, Janice; Kruczkiewicz, Peter; Nguyen, Hoang Hai; Fisher, Mathew; Lung, Oliver; Berhane, Yohannes
EPI2235574	PB1	Canada	2022-May-09	EPI_ISL_16003267	A/Red Fox/MB/FAV-0414-12/2022	Manitoba Agriculture	Canadian Food Inspection Agency	Alkie, Tamiru; Cox, Sherri; Pople, Neil; Xu, Wanhong; Hisanaga, Tamiko; Suderman, Suderman; Koziuk, Janice; Kruczkiewicz, Peter; Nguyen, Hoang Hai; Fisher, Mathew; Lung, Oliver; Berhane, Yohannes
EPI2235566	PB1	Canada	2022-May-09	EPI_ISL_16003266	A/Red Fox/MB/FAV-414-08/2022	Manitoba Agriculture	Canadian Food Inspection Agency	Alkie, Tamiru; Cox, Sherri; Pople, Neil; Xu, Wanhong; Hisanaga, Tamiko; Suderman, Suderman; Koziuk, Janice; Kruczkiewicz, Peter; Nguyen, Hoang Hai; Fisher, Mathew; Lung, Oliver; Berhane, Yohannes
EPI2235550	PB1	Canada	2022-Apr-07	EPI_ISL_16003253	A/Red Fox/MB/FAV-370-01/2022	Manitoba Agriculture	Canadian Food Inspection Agency	Alkie, Tamiru; Cox, Sherri; Pople, Neil; Xu, Wanhong; Hisanaga, Tamiko; Suderman, Suderman; Koziuk, Janice; Kruczkiewicz, Peter; Nguyen, Hoang Hai; Fisher, Mathew; Lung, Oliver; Berhane, Yohannes
EPI2182125	PB1	United States	2022-Jun-08	EPI_ISL_15078253	A/red fox/Michigan/22-018712-001/2022	National Veterinary Services Laboratories - USDA	National Veterinary Services Laboratories - USDA	Chinh,Thanh;Love, Emily;Franzen,Kerrie;Killian,Mary;Koster,Leo;Lantz,Kristina;Stuber,Tod;Hicks,Jessica
EPI2182109	PB1	United States	2022-Jun-03	EPI_ISL_15078251	A/red fox/North Dakota/22-017354-001/2022	National Veterinary Services Laboratories - USDA	National Veterinary Services Laboratories - USDA	Chinh,Thanh;Love, Emily;Franzen,Kerrie;Killian,Mary;Koster,Leo;Lantz,Kristina;Stuber,Tod;Hicks,Jessica
EPI2182093	PB1	United States	2022-May-13	EPI_ISL_15078249	A/fox/Minnesota/22-016487-001/2022	National Veterinary Services Laboratories - USDA	National Veterinary Services Laboratories - USDA	Chinh,Thanh;Love, Emily;Franzen,Kerrie;Killian,Mary;Koster,Leo;Lantz,Kristina;Stuber,Tod;Hicks,Jessica
EPI2182077	PB1	United States	2022-May-06	EPI_ISL_15078247	A/fox/Wisconsin/22-014746-030/2022	National Veterinary Services Laboratories - USDA	National Veterinary Services Laboratories - USDA	Chinh,Thanh;Love, Emily;Franzen,Kerrie;Killian,Mary;Koster,Leo;Lantz,Kristina;Stuber,Tod;Hicks,Jessica
EPI2182069	PB1	United States	2022-May-03	EPI_ISL_15078246	A/fox/Wisconsin/22-014746-008/2022	National Veterinary Services Laboratories - USDA	National Veterinary Services Laboratories - USDA	Chinh,Thanh;Love, Emily;Franzen,Kerrie;Killian,Mary;Koster,Leo;Lantz,Kristina;Stuber,Tod;Hicks,Jessica
EPI2182061	PB1	United States	2022-Apr-22	EPI_ISL_15078245	A/fox/Michigan/22-014536-004/2022	National Veterinary Services Laboratories - USDA	National Veterinary Services Laboratories - USDA	Chinh,Thanh;Love, Emily;Franzen,Kerrie;Killian,Mary;Koster,Leo;Lantz,Kristina;Stuber,Tod;Hicks,Jessica
EPI2158630	PB1	United Kingdom	2021-Dec-07	EPI_ISL_14864640	A/fox/England/M0025-12-21/2021	Animal and Plant Health Agency (APHA)	Animal and Plant Health Agency (APHA)
EPI2158614	PB1	United Kingdom	2022-Mar-09	EPI_ISL_14864638	A/fox/England/M0083-03-22/2022	Animal and Plant Health Agency (APHA)	Animal and Plant Health Agency (APHA)
EPI2131406	PB1	United States	2022-May-12	EPI_ISL_14553997	A/Vulpes vulpes/New_York/115912/2022	Cornell University	Cornell University	Diel, Diego G; Caserta, Leonardo Cardia; Cronk, Brittany D.
EPI2131381	PB1	United States	2022-Apr-04	EPI_ISL_14553810	A/Vulpes vulpes/New_York/099488/2022	Cornell University	Cornell University	Diel, Diego G; Caserta, Leonardo Cardia; Cronk, Brittany D.
EPI2130815	PB1	United States	2022-Apr-04	EPI_ISL_14533193	A/Vulpes vulpes/New_York/074441/2022	Cornell University	Cornell University	Diel,Diego G; Caserta,Leonardo Cardia; Cronk, Brittany D
EPI2129814	PB1	Belgium	2022-Apr-16	EPI_ISL_14493899	A/Vulpes_vulpes/Belgium/8660_0016/2022	Sciensano - Animal Infectious Diseases	Sciensano, Department of Animal Infectious Diseases	Van Borm, Steven; Mathijs, Elisabeth; Roupie, Virginie; Vervaeke, Muriel; Lambrecht, Benedicte; Steensels, Mieke
EPI1945583	PB1	Estonia	2021-Nov-08	EPI_ISL_7778880	A/Red_fox/Estonia/TA2126820_21VIR10433-13/2021	Estonian Veterinary and Food Laboratory	Istituto Zooprofilattico Sperimentale Delle Venezie	Nurmoja, I.; Vilem, A.; Juurik, T.; Zecchin, B.; Fusaro, A.; Schivo, A.; Salviato, A.; Palumbo, E.; Milani, A.; Giussani, E.; Pastori, A.; Monne, I.; Terregino, C.
EPI1859943	PB1	Netherlands	2021-May-17	EPI_ISL_2194218	A/red fox/Netherlands/21028774-002/2021	Wageningen Bioveterinary Research	Wageningen Bioveterinary Research	Beerens, Nancy; Harders, Frank; Pritz-Verschuren, Sylvia; Roose, Marit; Germeraad, Evelien; Engelsma, Marc; Bossers, Alex; Heutink, Rene
EPI2914892	PB1	Finland	2023-Aug-03	EPI_ISL_18764855	A/blue fox/Finland/UH-004-E1/2023	University of Helsinki, Department of Virology	Finnish Institute for Health and Welfare, THL	Altan, E ; Avelin, V; Lindh, E; Kakkola, L; Tammiranta, N; Nokireki, T; Gadd, T; Ikonen, N; Savolainen-Kopra, C; Sironen, T; √ñsterlund, P.
EPI2892566	PB1	Finland	2023-Aug-01	EPI_ISL_18728100	A/arctic-fox/Finland/677/2023	Finnish Food Authority	Finnish Food Authority	Kauppinen, Ari; Kareinen, Lauri; Tammiranta, Niina; Kantala, Tuija; Fusaro, Alice; Giussani, Edoardo; Gadd, Tuija
EPI2794119	PB1	Latvia	2023-May-25	EPI_ISL_18509071	A/fox/Latvia/34393_23VIR8835-1/2023	Institute of Food Safety, Animal Health and Environment "BIOR"	Istituto Zooprofilattico Sperimentale Delle Venezie	Krivko, L.; Pastori, A.; Zecchin, B.; Fusaro, A.; Schivo, A.; Salviato, A.; Palumbo, E.; Giussani, E.; Monne, I.; Terregino, C.
EPI2755724	PB1	Finland	2023-Aug-21	EPI_ISL_18290490	A/arctic-fox/Finland/1909/2023	Finnish Food Authority	Finnish Food Authority	Kauppinen, Ari; Kareinen, Lauri; Tammiranta, Niina; Kantala, Tuija; Fusaro, Alice; Gadd, Tuija
EPI2755716	PB1	Finland	2023-Aug-21	EPI_ISL_18290489	A/arctic-fox/Finland/1908/2023	Finnish Food Authority	Finnish Food Authority	Kauppinen, Ari; Kareinen, Lauri; Tammiranta, Niina; Kantala, Tuija; Fusaro, Alice; Gadd, Tuija
EPI2755688	PB1	Finland	2023-Aug-10	EPI_ISL_18290484	A/fox/Finland/1361/2023	Finnish Food Authority	Finnish Food Authority	Kauppinen, Ari; Kareinen, Lauri; Tammiranta, Niina; Kantala, Tuija; Fusaro, Alice; Gadd, Tuija
EPI2755673	PB1	Finland	2023-Aug-10	EPI_ISL_18290482	A/arctic-fox/Finland/966/2023	Finnish Food Authority	Finnish Food Authority	Kauppinen, Ari; Kareinen, Lauri; Tammiranta, Niina; Kantala, Tuija; Fusaro, Alice; Gadd, Tuija
EPI2755665	PB1	Finland	2023-Aug-07	EPI_ISL_18290481	A/arctic-fox/Finland/738/2023	Finnish Food Authority	Finnish Food Authority	Kauppinen, Ari; Kareinen, Lauri; Tammiranta, Niina; Kantala, Tuija; Fusaro, Alice; Gadd, Tuija
EPI2755597	PB1	Finland	2023-Aug-01	EPI_ISL_18290472	A/arctic-fox/Finland/674/2023	Finnish Food Authority	Finnish Food Authority	Kauppinen, Ari; Kareinen, Lauri; Tammiranta, Niina; Kantala, Tuija; Fusaro, Alice; Gadd, Tuija
EPI2755573	PB1	Finland	2023-Jul-14	EPI_ISL_18290469	A/arctic-fox/Finland/545/2023	Finnish Food Authority	Finnish Food Authority	Kauppinen, Ari; Kareinen, Lauri; Tammiranta, Niina; Kantala, Tuija; Fusaro, Alice; Gadd, Tuija
EPI2641477	PB1	Finland	2023-Jul-10	EPI_ISL_18011223	A/arctic-fox/Finland/504_23VIR6803-7/2023	Finnish Food Authority	Istituto Zooprofilattico Sperimentale Delle Venezie	Kantala, T.;Kauppinen, A.;Kareinen, L.;Gadd, T.;Galiano, M.;Ikonen, N.;Lindh, E.;Ormelli, S.;Varotto, M.;Zecchin, B.;Pastori, A.;Fusaro, A.;Zamperin, G.;Monne, I.;Terregino, C
EPI2641469	PB1	Finland	2023-Jul-10	EPI_ISL_18011222	A/arctic-fox/Finland/497_23VIR6803-5/2023	Finnish Food Authority	Istituto Zooprofilattico Sperimentale Delle Venezie	Kantala, T.;Kauppinen, A.;Kareinen, L.;Gadd, T.;Galiano, M.;Ikonen, N.;Lindh, E.;Ormelli, S.;Varotto, M.;Zecchin, B.;Pastori, A.;Fusaro, A.;Zamperin, G.;Monne, I.;Terregino, C
EPI2559541	PB1	Italy	2023-Apr-07	EPI_ISL_17679728	A/fox/Italy/23VIR3885-1/2023	Istituto Zooprofilattico Sperimentale delle Venezie, EU/OIE/Reference Laboratory and FAO Reference Centre for AI and ND	Istituto Zooprofilattico Sperimentale Delle Venezie	Pastori, A.; Zecchin, B.; Fusaro, A.; Schivo, A.; Salviato, A.; Palumbo, E.; Giussani, E.; Monne, I.; Terregino, C.
EPI2122958	PB1	Netherlands	2022-Feb-15	EPI_ISL_14393126	A/Fox/Netherlands/EMC6/2022	Erasmus Medical Center	Erasmus Medical Center
EPI2122943	PB1	Netherlands	2022-Apr-02	EPI_ISL_14393097	A/Fox/Netherlands/EMC4/2022	Erasmus Medical Center	Erasmus Medical Center
EPI2018066	PB1	Netherlands	2022-Jan-26	EPI_ISL_12066188	A/Fox/Netherlands/EMC1/2022	Erasmus Medical Center	Erasmus Medical Center	R.A.M., Fouchier; S., Therwessen; O., Vuong; I., Chestakova; R., Sikkema; P., Lexmond; M., Pronk
EPI1995280	PB1	Netherlands	2022-Feb-07	EPI_ISL_11019882	A/red fox/Netherlands/22002636-002/2022	Wageningen Bioveterinary Research	Wageningen Bioveterinary Research	Beerens, Nancy; Harders, Frank; Pritz-Verschuren, Sylvia; Roose, Marit; Venema, Sandra; Germeraad, Evelien; Engelsma, Marc; Heutink, Rene
EPI1995271	PB1	Netherlands	2022-Jan-03	EPI_ISL_11019784	A/red fox/Netherlands/22000097-005/2022	Wageningen Bioveterinary Research	Wageningen Bioveterinary Research	Beerens, Nancy; Harders, Frank; Pritz-Verschuren, Sylvia; Roose, Marit; Venema, Sandra; Germeraad, Evelien; Engelsma, Marc; Heutink, Rene
EPI1988051	PB1	Netherlands	2022-Feb-18	EPI_ISL_10454887	A/red fox/Netherlands/22003495-003/2022	Wageningen Bioveterinary Research	Wageningen Bioveterinary Research	Beerens, Nancy; Harders, Frank; Pritz-Verschuren, Sylvia; Roose, Marit; Venema, Sandra; Germeraad, Evelien; Engelsma, Marc; Heutink, Rene
EPI1987362	PB1	Netherlands	2022-Feb-11	EPI_ISL_10255587	A/red fox/Netherlands/22002993-003 /2022	Wageningen Bioveterinary Research	Wageningen Bioveterinary Research	Beerens, Nancy; Harders, Frank; Pritz-Verschuren, Sylvia; Roose, Marit; Venema, Sandra; Germeraad, Evelien; Engelsma, Marc; Heutink, Rene
EPI1987354	PB1	Netherlands	2022-Feb-11	EPI_ISL_10255581	A/red fox/Netherlands/22002992-003/2022	Wageningen Bioveterinary Research	Wageningen Bioveterinary Research	Beerens, Nancy; Harders, Frank; Pritz-Verschuren, Sylvia; Roose, Marit; Venema, Sandra; Germeraad, Evelien; Engelsma, Marc; Heutink, Rene
EPI1988015	PB1	Netherlands	2021-Dec-03	EPI_ISL_7683138	A/red fox/Netherlands/21040099-007/2021	Wageningen Bioveterinary Research	Wageningen Bioveterinary Research	Beerens, Nancy; Harders, Frank; Pritz-Verschuren, Sylvia; Roose, Marit; Venema, Sandra; Germeraad, Evelien; Engelsma, Marc; Heutink, Rene
EPI1988007	PB1	Netherlands	2021-Dec-03	EPI_ISL_7683137	A/red fox/Netherlands/21040099-006/2021	Wageningen Bioveterinary Research	Wageningen Bioveterinary Research	Beerens, Nancy; Harders, Frank; Pritz-Verschuren, Sylvia; Roose, Marit; Venema, Sandra; Germeraad, Evelien; Engelsma, Marc; Heutink, Rene
EPI1943563	PB1	Netherlands	2021-Dec-03	EPI_ISL_7683118	A/red fox/Netherlands/21040099-001/2021	Wageningen Bioveterinary Research	Wageningen Bioveterinary Research	Beerens, Nancy; Harders, Frank; Pritz-Verschuren, Sylvia; Roose, Marit; Venema, Sandra; Germeraad, Evelien; Engelsma, Marc; Heutink, Rene
EPI3177564	PB1	Germany	2023-Jun-12	EPI_ISL_19029378	A/Fox/Bavaria/i193/2023	Bayerisches Landesamt f√ºr Gesundheit und Lebensmittelsicherheit	Bayerisches Landesamt f√ºr Gesundheit und Lebensmittelsicherheit
EPI2730915	PB1	United Kingdom	2023-Jul-26	EPI_ISL_18226744	A/red fox/Northern Ireland/22191/2023	AFBI - Agri-Food & Bioscience Institute	Agri-Food and Biosciences Institute (AFBINI)	Lagan, P.; Lemon, K.
EPI2730907	PB1	United Kingdom	2023-Jul-26	EPI_ISL_18226743	A/red fox/Northern Ireland/22185/2023	AFBI - Agri-Food & Bioscience Institute	Agri-Food and Biosciences Institute (AFBINI)	Lagan, P.; Lemon, K.
EPI2697664	PB1	Finland	2023-Jul-24	EPI_ISL_18123935	A/arctic-fox/Finland/615/2023	Finnish Food Authority	Finnish Institute for Health and Welfare, THL	Tuija Kantala, Alice Fusaro, Tuija Gadd, Monica Gallo, Niina Ikonen, Lauri Kareinen, Ari Kauppinen, Niina Tammiranta, Erika Lindh
EPI2697656	PB1	Finland	2023-Jul-24	EPI_ISL_18123934	A/arctic-fox/Finland/614/2023	Finnish Food Authority	Finnish Institute for Health and Welfare, THL	Tuija Kantala, Alice Fusaro, Tuija Gadd, Monica Gallo, Niina Ikonen, Lauri Kareinen, Ari Kauppinen, Niina Tammiranta, Erika Lindh
EPI2697648	PB1	Finland	2023-Jul-24	EPI_ISL_18123933	A/arctic-fox/Finland/613/2023	Finnish Food Authority	Finnish Institute for Health and Welfare, THL	Tuija Kantala, Alice Fusaro, Tuija Gadd, Monica Gallo, Niina Ikonen, Lauri Kareinen, Ari Kauppinen, Niina Tammiranta, Erika Lindh
EPI2697640	PB1	Finland	2023-Jul-20	EPI_ISL_18123932	A/fox/Finland/610/2023	Finnish Food Authority	Finnish Institute for Health and Welfare, THL	Tuija Kantala, Alice Fusaro, Tuija Gadd, Monica Gallo, Niina Ikonen, Lauri Kareinen, Ari Kauppinen, Niina Tammiranta, Erika Lindh
EPI2697632	PB1	Finland	2023-Jul-20	EPI_ISL_18123931	A/fox/Finland/602/2023	Finnish Food Authority	Finnish Institute for Health and Welfare, THL	Tuija Kantala, Alice Fusaro, Tuija Gadd, Monica Gallo, Niina Ikonen, Lauri Kareinen, Ari Kauppinen, Niina Tammiranta, Erika Lindh
EPI2697500	PB1	Finland	2023-Jul-17	EPI_ISL_18122445	A/red-fox/Finland/553/2023	Finnish Food Authority	Finnish Institute for Health and Welfare, THL	Tuija Kantala, Alice Fusaro, Tuija Gadd, Monica Gallo, Niina Ikonen, Lauri Kareinen, Ari Kauppinen, Niina Tammiranta, Erika Lindh
EPI2697486	PB1	Finland	2023-Jul-24	EPI_ISL_18122443	A/fox/Finland/612/2023	Finnish Food Authority	Finnish Institute for Health and Welfare, THL	Tuija Kantala, Alice Fusaro, Tuija Gadd, Monica Gallo, Niina Ikonen, Lauri Kareinen, Ari Kauppinen, Niina Tammiranta, Erika Lindh
EPI2697478	PB1	Finland	2023-Jul-20	EPI_ISL_18122442	A/fox/Finland/603/2023	Finnish Food Authority	Finnish Institute for Health and Welfare, THL	Tuija Kantala, Alice Fusaro, Tuija Gadd, Monica Gallo, Niina Ikonen, Lauri Kareinen, Ari Kauppinen, Niina Tammiranta, Erika Lindh
EPI2697470	PB1	Finland	2023-Jul-20	EPI_ISL_18122441	A/fox/Finland/601/2023	Finnish Food Authority	Finnish Institute for Health and Welfare, THL	Tuija Kantala, Alice Fusaro, Tuija Gadd, Monica Gallo, Niina Ikonen, Lauri Kareinen, Ari Kauppinen, Niina Tammiranta, Erika Lindh
EPI2697462	PB1	Finland	2023-Jul-24	EPI_ISL_18122440	A/arctic-fox/Finland/622/2023	Finnish Food Authority	Finnish Institute for Health and Welfare, THL	Tuija Kantala, Alice Fusaro, Tuija Gadd, Monica Gallo, Niina Ikonen, Lauri Kareinen, Ari Kauppinen, Niina Tammiranta, Erika Lindh
EPI2697454	PB1	Finland	2023-Jul-24	EPI_ISL_18122439	A/arctic-fox/Finland/621/2023	Finnish Food Authority	Finnish Institute for Health and Welfare, THL	Tuija Kantala, Alice Fusaro, Tuija Gadd, Monica Gallo, Niina Ikonen, Lauri Kareinen, Ari Kauppinen, Niina Tammiranta, Erika Lindh
EPI2697446	PB1	Finland	2023-Jul-24	EPI_ISL_18122438	A/arctic-fox/Finland/620/2023	Finnish Food Authority	Finnish Institute for Health and Welfare, THL	Tuija Kantala, Alice Fusaro, Tuija Gadd, Monica Gallo, Niina Ikonen, Lauri Kareinen, Ari Kauppinen, Niina Tammiranta, Erika Lindh
EPI2697438	PB1	Finland	2023-Jul-24	EPI_ISL_18122437	A/arctic-fox/Finland/619/2023	Finnish Food Authority	Finnish Institute for Health and Welfare, THL	Tuija Kantala, Alice Fusaro, Tuija Gadd, Monica Gallo, Niina Ikonen, Lauri Kareinen, Ari Kauppinen, Niina Tammiranta, Erika Lindh
EPI2697430	PB1	Finland	2023-Jul-24	EPI_ISL_18122436	A/arctic-fox/Finland/618/2023	Finnish Food Authority	Finnish Institute for Health and Welfare, THL	Tuija Kantala, Alice Fusaro, Tuija Gadd, Monica Gallo, Niina Ikonen, Lauri Kareinen, Ari Kauppinen, Niina Tammiranta, Erika Lindh
EPI2697407	PB1	Finland	2023-Jul-18	EPI_ISL_18122433	A/arctic-fox/Finland/577/2023	Finnish Food Authority	Finnish Institute for Health and Welfare, THL	Tuija Kantala, Alice Fusaro, Tuija Gadd, Monica Gallo, Niina Ikonen, Lauri Kareinen, Ari Kauppinen, Niina Tammiranta, Erika Lindh
EPI2697399	PB1	Finland	2023-Jul-18	EPI_ISL_18122432	A/arctic-fox/Finland/576/2023	Finnish Food Authority	Finnish Institute for Health and Welfare, THL	Tuija Kantala, Alice Fusaro, Tuija Gadd, Monica Gallo, Niina Ikonen, Lauri Kareinen, Ari Kauppinen, Niina Tammiranta, Erika Lindh
EPI2697391	PB1	Finland	2023-Jul-18	EPI_ISL_18122431	A/arctic-fox/Finland/575/2023	Finnish Food Authority	Finnish Institute for Health and Welfare, THL	Tuija Kantala, Alice Fusaro, Tuija Gadd, Monica Gallo, Niina Ikonen, Lauri Kareinen, Ari Kauppinen, Niina Tammiranta, Erika Lindh
EPI2697383	PB1	Finland	2023-Jul-18	EPI_ISL_18122430	A/arctic-fox/Finland/574/2023	Finnish Food Authority	Finnish Institute for Health and Welfare, THL	Tuija Kantala, Alice Fusaro, Tuija Gadd, Monica Gallo, Niina Ikonen, Lauri Kareinen, Ari Kauppinen, Niina Tammiranta, Erika Lindh
EPI2697375	PB1	Finland	2023-Jul-17	EPI_ISL_18122429	A/arctic-fox/Finland/567/2023	Finnish Food Authority	Finnish Institute for Health and Welfare, THL	Tuija Kantala, Alice Fusaro, Tuija Gadd, Monica Gallo, Niina Ikonen, Lauri Kareinen, Ari Kauppinen, Niina Tammiranta, Erika Lindh
EPI2697360	PB1	Finland	2023-Jul-17	EPI_ISL_18122427	A/arctic-fox/Finland/565/2023	Finnish Food Authority	Finnish Institute for Health and Welfare, THL	Tuija Kantala, Alice Fusaro, Tuija Gadd, Monica Gallo, Niina Ikonen, Lauri Kareinen, Ari Kauppinen, Niina Tammiranta, Erika Lindh
EPI2697344	PB1	Finland	2023-Jul-14	EPI_ISL_18122425	A/arctic-fox/Finland/547/2023	Finnish Food Authority	Finnish Institute for Health and Welfare, THL	Tuija Kantala, Alice Fusaro, Tuija Gadd, Monica Gallo, Niina Ikonen, Lauri Kareinen, Ari Kauppinen, Niina Tammiranta, Erika Lindh
EPI2697336	PB1	Finland	2023-Jul-14	EPI_ISL_18122424	A/arctic-fox/Finland/544/2023	Finnish Food Authority	Finnish Institute for Health and Welfare, THL	Tuija Kantala, Alice Fusaro, Tuija Gadd, Monica Gallo, Niina Ikonen, Lauri Kareinen, Ari Kauppinen, Niina Tammiranta, Erika Lindh
EPI2697328	PB1	Finland	2023-Jul-14	EPI_ISL_18122423	A/arctic-fox/Finland/543/2023	Finnish Food Authority	Finnish Institute for Health and Welfare, THL	Tuija Kantala, Alice Fusaro, Tuija Gadd, Monica Gallo, Niina Ikonen, Lauri Kareinen, Ari Kauppinen, Niina Tammiranta, Erika Lindh
EPI2697320	PB1	Finland	2023-Jul-14	EPI_ISL_18122422	A/arctic-fox/Finland/542/2023	Finnish Food Authority	Finnish Institute for Health and Welfare, THL	Tuija Kantala, Alice Fusaro, Tuija Gadd, Monica Gallo, Niina Ikonen, Lauri Kareinen, Ari Kauppinen, Niina Tammiranta, Erika Lindh
EPI2697311	PB1	Finland	2023-Jul-14	EPI_ISL_18122421	A/arctic-fox/Finland/536/2023	Finnish Food Authority	Finnish Institute for Health and Welfare, THL	Tuija Kantala, Alice Fusaro, Tuija Gadd, Monica Gallo, Niina Ikonen, Lauri Kareinen, Ari Kauppinen, Niina Tammiranta, Erika Lindh
EPI2697303	PB1	Finland	2023-Jul-10	EPI_ISL_18122420	A/arctic-fox/Finland/504/2023	Finnish Food Authority	Finnish Institute for Health and Welfare, THL	Tuija Kantala, Alice Fusaro, Tuija Gadd, Monica Gallo, Niina Ikonen, Lauri Kareinen, Ari Kauppinen, Niina Tammiranta, Erika Lindh
EPI2697288	PB1	Finland	2023-Jul-10	EPI_ISL_18122418	A/arctic-fox/Finland/495/2023	Finnish Food Authority	Finnish Institute for Health and Welfare, THL	Tuija Kantala, Alice Fusaro, Tuija Gadd, Monica Gallo, Niina Ikonen, Lauri Kareinen, Ari Kauppinen, Niina Tammiranta, Erika Lindh
EPI2608634	PB1	Germany	2023-Mar-29	EPI_ISL_17880914	A/Red fox/Germany/51023-261/2023	Lower Saxony State Office for Consumer Protection and Food Safety	Lower Saxony State Office for Consumer Protection & Food Safety
EPI2608617	PB1	Germany	2023-Feb-09	EPI_ISL_17880911	A/Red fox/Germany/51023-124/2023	Lower Saxony State Office for Consumer Protection and Food Safety	Lower Saxony State Office for Consumer Protection & Food Safety
EPI2608593	PB1	Germany	2023-Jan-31	EPI_ISL_17880908	A/Red fox/Germany/51023-113/2023	Lower Saxony State Office for Consumer Protection and Food Safety	Lower Saxony State Office for Consumer Protection & Food Safety
EPI2608562	PB1	Germany	2023-Jan-09	EPI_ISL_17880904	A/Red fox/Germany/51023-60/2023	Lower Saxony State Office for Consumer Protection and Food Safety	Lower Saxony State Office for Consumer Protection & Food Safety
EPI2467143	PB1	France	2023-Feb-10	EPI_ISL_17233302	A/fox/France/23P002844/2023	Anses (Ploufragan-Plouzan√©)	ANSES Agence Nationale De Securite Sanitaire De L‚Äôalimentation
EPI2297253	PB1	Belgium	2022-Dec-08	EPI_ISL_16549380	A/Vulpes_vulpes/Belgium/14775-0001/2022	Sciensano - Animal Infectious Diseases	Sciensano, Department of Animal Infectious Diseases	Van Borm, Steven; Roupie, Virginie; Hostyn, Pierre; Lambrecht, Benedicte; Steensels, Mieke
EPI3073425	PB1	Germany	2024-Jan-01	EPI_ISL_18937337	A/fox/Germany-BW/2024AI00417/2024	Friedrich-Loeffler-Institut	Friedrich-Loeffler-Institut
EPI2764339	PB1	Belgium	2023-May-17	EPI_ISL_18347730	A/Vulpes_vulpes/Belgium/04757_0004/2023	Sciensano - Animal Infectious Diseases	Sciensano, Department of Animal Infectious Diseases	Van Borm, Steven; Roupie, Virginie; Hostyn, Pierre; Mathijs, Elisabeth; Lambrecht, Benedicte; Steensels, Mieke
EPI2639288	PB1	Japan	2023-Feb-20	EPI_ISL_17857959	A/Ezo red fox/Hokkaido/3/2023	Graduate School of Veterinary Medicine, Hokkaido University	Graduate School of Veterinary Medicine, Hokkaido University	Yoshihiro, Sakoda; Norikazu, Isoda; Takahiro, Hiono; Yik Lim, Hew; Tatsuru, Morita
EPI2585315	PB1	Belgium	2023-Apr-24	EPI_ISL_17774571	A/Vulpes_Vulpes/Belgium/04018_0005/2023	Sciensano - Animal Infectious Diseases	Sciensano, Department of Animal Infectious Diseases	Van Borm, Steven; Roupie, Virginie; Hostyn, Pierre; Mathijs, Elisabeth; Lambrecht, Benedicte; Steensels, Mieke
EPI2585306	PB1	Belgium	2023-Apr-24	EPI_ISL_17774570	A/Vulpes_Vulpes/Belgium/04016_0001/2023	Sciensano - Animal Infectious Diseases	Sciensano, Department of Animal Infectious Diseases	Van Borm, Steven; Roupie, Virginie; Hostyn, Pierre; Mathijs, Elisabeth; Lambrecht, Benedicte; Steensels, Mieke
EPI2585298	PB1	Belgium	2023-Apr-14	EPI_ISL_17774358	A/Vulpes_Vulpes/Belgium/03704_0001/2023	Sciensano - Animal Infectious Diseases	Sciensano, Department of Animal Infectious Diseases	Van Borm, Steven; Roupie, Virginie; Hostyn, Pierre; Mathijs, Elisabeth; Lambrecht, Benedicte; Steensels, Mieke
EPI2585290	PB1	Belgium	2023-Apr-14	EPI_ISL_17774357	A/Vulpes_Vulpes/Belgium/03703_0007/2023	Sciensano - Animal Infectious Diseases	Sciensano, Department of Animal Infectious Diseases	Van Borm, Steven; Roupie, Virginie; Hostyn, Pierre; Mathijs, Elisabeth; Lambrecht, Benedicte; Steensels, Mieke
EPI2585280	PB1	Belgium	2023-Apr-14	EPI_ISL_17774308	A/Vulpes_Vulpes/Belgium/03703_0003/2023	Sciensano - Animal Infectious Diseases	Sciensano, Department of Animal Infectious Diseases	Van Borm, Steven; Roupie, Virginie; Hostyn, Pierre; Mathijs, Elisabeth; Lambrecht, Benedicte; Steensels, Mieke
EPI2585273	PB1	Belgium	2023-Apr-14	EPI_ISL_17774224	A/Vulpes_Vulpes/Belgium/03703_0001/2023	Sciensano - Animal Infectious Diseases	Sciensano, Department of Animal Infectious Diseases	Van Borm, Steven; Roupie, Virginie; Hostyn, Pierre; Mathijs, Elisabeth; Lambrecht, Benedicte; Steensels, Mieke
EPI2584337	PB1	Japan	2023-Apr-12	EPI_ISL_17766057	A/Ezo red fox/Hokkaido/2/2023	Graduate School of Veterinary Medicine, Hokkaido University	Graduate School of Veterinary Medicine, Hokkaido University	Yoshihiro,Sakoda; Norikazu,Isoda; Takahiro,Hiono; Yik Lim,Hew; Tatsuru,Morita
EPI2540295	PB1	Belgium	2023-Feb-10	EPI_ISL_17606263	A/Vulpes_vulpes/Belgium/01295_0002/2023	Sciensano - Animal Infectious Diseases	Sciensano, Department of Animal Infectious Diseases	Van Borm, Steven; Roupie, Virginie; Hostyn, Pierre; Mathijs, Elisabeth; Lambrecht, Benedicte; Steensels, Mieke
EPI2499736	PB1	Canada	2022-Apr-15	EPI_ISL_17393093	A/Red Fox/ON/FAV-0301-05/2022	Ontario Veterinary College, University of Guelph	Canadian Food Inspection Agency	Alkie, T; Ojkic, D; Stevens, B; Xu, W; Hisanaga, T; Koziuk, T; Fisher, M; Lung, O; Berhane, Y
EPI2259577	PB1	Canada	2022-Apr-15	EPI_ISL_16248229	A/Red fox/ON/FAV-0301-05/2022	Ontario Veterinary College, University of Guelph	Canadian Food Inspection Agency	Alkie, Tamiru; Cox, Sherri; Ojkic, Davor; Stevens, Brian; Xu, Wanhong; Hisanaga, Tamiko; Suderman, Suderman; Koziuk, Janice; Kruczkiewicz, Peter; Nguyen, Hoang Hai; Fisher, Mathew; Lung, Oliver; Berhane, Yohannes
EPI2259569	PB1	Canada	2022-May-24	EPI_ISL_16244526	A/Red fox/PEI/FAV-0592-01/2022	Atlantic Veterinary College, University of Prince Edward Island	Canadian Food Inspection Agency	Alkie, Tamiru; Yason, Carmencita; Jones, Megan E. B.; Bourque, Laura; Xu, Wanhong; Hisanaga, Tamiko; Suderman, Suderman; Koziuk, Janice; Kruczkiewicz, Peter; Nguyen, Hoang Hai; Fisher, Mathew; Lung, Oliver; Berhane, Yohannes
EPI2259317	PB1	United States	2022-May-11	EPI_ISL_16243970	A/fox/Iowa/22-015357-002/2022	National Veterinary Services Laboratories - USDA	National Veterinary Services Laboratories - USDA	Chinh,Thanh;Love, Emily;Franzen,Kerrie;Killian,Mary;Koster,Leo;Lantz,Kristina;Stuber,Tod;Hicks,Jessica
EPI2258917	PB1	United States	2022-Apr-22	EPI_ISL_16240637	A/fox/Michigan/22-014536-008/2022	National Veterinary Services Laboratories - USDA	National Veterinary Services Laboratories - USDA	Chinh,Thanh;Love, Emily;Franzen,Kerrie;Killian,Mary;Koster,Leo;Lantz,Kristina;Stuber,Tod;Hicks,Jessica
EPI2258909	PB1	United States	2022-Apr-22	EPI_ISL_16240636	A/fox/Michigan/22-014536-007/2022	National Veterinary Services Laboratories - USDA	National Veterinary Services Laboratories - USDA	Chinh,Thanh;Love, Emily;Franzen,Kerrie;Killian,Mary;Koster,Leo;Lantz,Kristina;Stuber,Tod;Hicks,Jessica
EPI2258901	PB1	United States	2022-Apr-22	EPI_ISL_16240635	A/fox/Michigan/22-014536-002/2022	National Veterinary Services Laboratories - USDA	National Veterinary Services Laboratories - USDA	Chinh,Thanh;Love, Emily;Franzen,Kerrie;Killian,Mary;Koster,Leo;Lantz,Kristina;Stuber,Tod;Hicks,Jessica
EPI2258893	PB1	United States	2022-Apr-22	EPI_ISL_16240634	A/fox/Michigan/22-014536-001/2022	National Veterinary Services Laboratories - USDA	National Veterinary Services Laboratories - USDA	Chinh,Thanh;Love, Emily;Franzen,Kerrie;Killian,Mary;Koster,Leo;Lantz,Kristina;Stuber,Tod;Hicks,Jessica
EPI2236676	PB1	Canada	2022-Jun-10	EPI_ISL_16023371	A/Red Fox/AB/FAV-0835-13/2022	Alberta Agriculture and Forestry, Government of Alberta	Canadian Food Inspection Agency	Alkie, Tamiru; Hicks, Mark; Pybuse, Margo J; Xu, Wanhong; Hisanaga, Tamiko; Suderman, Suderman; Koziuk, Janice; Kruczkiewicz, Peter; Nguyen, Hoang Hai; Fisher, Mathew; Lung, Oliver; Berhane, Yohannes
EPI2236668	PB1	Canada	2022-May-05	EPI_ISL_16023370	A/Red Fox/AB/FAV-0835-02/2022	Alberta Agriculture and Forestry, Government of Alberta	Canadian Food Inspection Agency	Alkie, Tamiru; Hicks, Mark; Pybuse, Margo J; Xu, Wanhong; Hisanaga, Tamiko; Suderman, Suderman; Koziuk, Janice; Kruczkiewicz, Peter; Nguyen, Hoang Hai; Fisher, Mathew; Lung, Oliver; Berhane, Yohannes
EPI2236551	PB1	Canada	2022-May-05	EPI_ISL_16023345	A/Red Fox/AB/FAV-0835-01/2022	Alberta Agriculture and Forestry, Government of Alberta	Canadian Food Inspection Agency	Alkie, Tamiru; Hicks, Mark; Pybuse, Margo; Xu, Wanhong; Hisanaga, Tamiko; Suderman, Suderman; Koziuk, Janice; Kruczkiewicz, Peter; Nguyen, Hoang Hai; Fisher, Mathew; Lung, Oliver; Berhane, Yohannes
EPI2236493	PB1	Canada	2022-May-24	EPI_ISL_16020774	A/Red Fox/PEI/FAV-0591-01/2022	Atlantic Veterinary College, University of Prince Edward Island	Canadian Food Inspection Agency	Alkie, Tamiru; Yason, Carmencita; Jones, E.B. Megan; Bourque, Laura; Xu, Wanhong; Hisanaga, Tamiko; Suderman, Suderman; Koziuk, Janice; Kruczkiewicz, Peter; Nguyen, Hoang Hai; Fisher, Mathew; Lung, Oliver; Berhane, Yohannes
EPI2236485	PB1	Canada	2022-May-19	EPI_ISL_16020773	A/Red Fox/PEI/FAV-0544/2022	Atlantic Veterinary College, University of Prince Edward Island	Canadian Food Inspection Agency	Alkie, Tamiru; Yason, Carmencita; Jones, E.B. Megan; Bourque, Laura; Xu, Wanhong; Hisanaga, Tamiko; Suderman, Suderman; Koziuk, Janice; Kruczkiewicz, Peter; Nguyen, Hoang Hai; Fisher, Mathew; Lung, Oliver; Berhane, Yohannes
EPI2236477	PB1	Canada	2022-May-24	EPI_ISL_16020772	A/Red Fox/PEI/FAV-0592-02/2022	Atlantic Veterinary College, University of Prince Edward Island	Canadian Food Inspection Agency	Alkie, Tamiru; Yason, Carmencita; Jones, E.B. Megan; Bourque, Laura; Xu, Wanhong; Hisanaga, Tamiko; Suderman, Suderman; Koziuk, Janice; Kruczkiewicz, Peter; Nguyen, Hoang Hai; Fisher, Mathew; Lung, Oliver; Berhane, Yohannes
EPI2236766	PB1	Canada	2022-Apr-22	EPI_ISL_16014529	A/Red Fox/ON/FAV-0558-02/2022	Ontario Veterinary College, University of Guelph	Canadian Food Inspection Agency	Alkie, Tamiru; Cox, Sherri; Ojkic, Davor; Stevens, Brian; Xu, Wanhong; Hisanaga, Tamiko; Suderman, Suderman; Koziuk, Janice; Kruczkiewicz, Peter; Nguyen, Hoang Hai; Fisher, Mathew; Lung, Oliver; Berhane, Yohannes
EPI2236290	PB1	Canada	2022-Apr-22	EPI_ISL_16014527	A/Red Fox/ON/FAV-0558-01/2022	Ontario Veterinary College, University of Guelph	Canadian Food Inspection Agency	Alkie, Tamiru; Cox, Sherri; Ojkic, Davor; Stevens, Brian; Xu, Wanhong; Hisanaga, Tamiko; Suderman, Suderman; Koziuk, Janice; Kruczkiewicz, Peter; Nguyen, Hoang Hai; Fisher, Mathew; Lung, Oliver; Berhane, Yohannes
EPI2236254	PB1	Canada	2022-Apr-16	EPI_ISL_16014448	A/Red Fox/ON/FAV-0531/2022	Ontario Veterinary College, University of Guelph	Canadian Food Inspection Agency	Alkie, Tamiru; Cox, Sherri; Ojkic, Davor; Stevens, Brian; Xu, Wanhong; Hisanaga, Tamiko; Suderman, Suderman; Koziuk, Janice; Kruczkiewicz, Peter; Nguyen, Hoang Hai; Fisher, Mathew; Lung, Oliver; Berhane, Yohannes
EPI2236246	PB1	Canada	2022-Apr-13	EPI_ISL_16014445	A/Red Fox/ON/FAV-0300-06/2022	Ontario Veterinary College, University of Guelph	Canadian Food Inspection Agency	Alkie, Tamiru; Cox, Sherri; Ojkic, Davor; Stevens, Brian; Xu, Wanhong; Hisanaga, Tamiko; Suderman, Suderman; Koziuk, Janice; Kruczkiewicz, Peter; Nguyen, Hoang Hai; Fisher, Mathew; Lung, Oliver; Berhane, Yohannes
EPI2236238	PB1	Canada	2022-Apr-22	EPI_ISL_16014368	A/Red Fox/ON/FAV-0300-05/2022	Ontario Veterinary College, University of Guelph	Canadian Food Inspection Agency	Alkie, Tamiru; Cox, Sherri; Ojkic, Davor; Stevens, Brian; Xu, Wanhong; Hisanaga, Tamiko; Suderman, Suderman; Koziuk, Janice; Kruczkiewicz, Peter; Nguyen, Hoang Hai; Fisher, Mathew; Lung, Oliver; Berhane, Yohannes
EPI2131368	PB1	United States	2022-May-04	EPI_ISL_14552975	A/Vulpes vulpes/New_York/099451/2022	Cornell University	Cornell University	Diel, Diego G; Caserta, Leonardo Cardia; Cronk, Brittany D.
EPI2129830	PB1	Belgium	2022-Jun-16	EPI_ISL_14494796	A/Vulpes_vulpes/Belgium/9031_0008/2022	Sciensano - Animal Infectious Diseases	Sciensano, Department of Animal Infectious Diseases	Van Borm, Steven; Mathijs, Elisabeth; Roupie, Virginie; Vervaeke, Muriel; Lambrecht, Benedicte; Steensels, Mieke
EPI2053951	PB1	United States	2022-May-06	EPI_ISL_13052728	A/fox/Wisconsin/22-014746-029/2022	National Veterinary Services Laboratories - USDA	National Veterinary Services Laboratories - USDA	Chinh,Thanh;Franzen,Kerrie;Love, Emily;Killian,Mary;Koster,Leo;Lantz,Kristina;Stuber,Tod;Hicks,Jessica
EPI2053943	PB1	United States	2022-May-06	EPI_ISL_13052727	A/fox/Wisconsin/22-014746-023/2022	National Veterinary Services Laboratories - USDA	National Veterinary Services Laboratories - USDA	Chinh,Thanh;Franzen,Kerrie;Love, Emily;Killian,Mary;Koster,Leo;Lantz,Kristina;Stuber,Tod;Hicks,Jessica
EPI2053935	PB1	United States	2022-May-03	EPI_ISL_13052726	A/fox/Wisconsin/22-014746-016/2022	National Veterinary Services Laboratories - USDA	National Veterinary Services Laboratories - USDA	Chinh,Thanh;Franzen,Kerrie;Love, Emily;Killian,Mary;Koster,Leo;Lantz,Kristina;Stuber,Tod;Hicks,Jessica
EPI2053927	PB1	United States	2022-May-03	EPI_ISL_13052725	A/fox/Wisconsin/22-014746-010/2022	National Veterinary Services Laboratories - USDA	National Veterinary Services Laboratories - USDA	Chinh,Thanh;Franzen,Kerrie;Love, Emily;Killian,Mary;Koster,Leo;Lantz,Kristina;Stuber,Tod;Hicks,Jessica
EPI2053919	PB1	United States	2022-May-09	EPI_ISL_13052724	A/fox/Minnesota/22-014661-001/2022	National Veterinary Services Laboratories - USDA	National Veterinary Services Laboratories - USDA	Chinh,Thanh;Franzen,Kerrie;Love, Emily;Killian,Mary;Koster,Leo;Lantz,Kristina;Stuber,Tod;Hicks,Jessica
EPI2053911	PB1	United States	2022-May-10	EPI_ISL_13052723	A/fox/Minnesota/22-014660-002/2022	National Veterinary Services Laboratories - USDA	National Veterinary Services Laboratories - USDA	Chinh,Thanh;Franzen,Kerrie;Love, Emily;Killian,Mary;Koster,Leo;Lantz,Kristina;Stuber,Tod;Hicks,Jessica
EPI2053903	PB1	United States	2022-May-10	EPI_ISL_13052722	A/fox/Minnesota/22-014660-001/2022	National Veterinary Services Laboratories - USDA	National Veterinary Services Laboratories - USDA	Chinh,Thanh;Franzen,Kerrie;Love, Emily;Killian,Mary;Koster,Leo;Lantz,Kristina;Stuber,Tod;Hicks,Jessica
EPI2053895	PB1	United States	2022-May-06	EPI_ISL_13052721	A/fox/Iowa/22-014421-001/2022	National Veterinary Services Laboratories - USDA	National Veterinary Services Laboratories - USDA	Chinh,Thanh;Franzen,Kerrie;Love, Emily;Killian,Mary;Koster,Leo;Lantz,Kristina;Stuber,Tod;Hicks,Jessica
EPI2053887	PB1	United States	2022-Apr-22	EPI_ISL_13052720	A/fox/Minnesota/22-014182-001/2022	National Veterinary Services Laboratories - USDA	National Veterinary Services Laboratories - USDA	Chinh,Thanh;Franzen,Kerrie;Love, Emily;Killian,Mary;Koster,Leo;Lantz,Kristina;Stuber,Tod;Hicks,Jessica
EPI2053879	PB1	United States	2022-May-01	EPI_ISL_13052719	A/fox/Wisconsin/22-013774-014/2022	National Veterinary Services Laboratories - USDA	National Veterinary Services Laboratories - USDA	Chinh,Thanh;Franzen,Kerrie;Love, Emily;Killian,Mary;Koster,Leo;Lantz,Kristina;Stuber,Tod;Hicks,Jessica
EPI2053871	PB1	United States	2022-May-01	EPI_ISL_13052718	A/fox/Wisconsin/22-013774-009/2022	National Veterinary Services Laboratories - USDA	National Veterinary Services Laboratories - USDA	Chinh,Thanh;Franzen,Kerrie;Love, Emily;Killian,Mary;Koster,Leo;Lantz,Kristina;Stuber,Tod;Hicks,Jessica
EPI2053863	PB1	United States	2022-May-01	EPI_ISL_13052717	A/fox/Wisconsin/22-013774-002/2022	National Veterinary Services Laboratories - USDA	National Veterinary Services Laboratories - USDA	Chinh,Thanh;Franzen,Kerrie;Love, Emily;Killian,Mary;Koster,Leo;Lantz,Kristina;Stuber,Tod;Hicks,Jessica
EPI2021930	PB1	Japan	2022-Mar-31	EPI_ISL_12174842	A/Ezo red fox/Hokkaido/1/2022	Graduate School of Veterinary Medicine, Hokkaido University	Graduate School of Veterinary Medicine, Hokkaido University	Yoshihiro, SAKODA; Takahiro, HIONO; Norikazu, ISODA
EPI1998136	PB1	Ireland	2022-Feb-14	EPI_ISL_11259283	A/fox/Ireland/3866_22VIR2064-1/2022	Central Veterinary Research Laboratory	Istituto Zooprofilattico Sperimentale delle Venezie	Byrne, C.; Garcia, K.; Cuartero, L.G.; Barbierato, G.; Zecchin, B.; Fusaro, A.; Schivo, A.; Salviato, A.; Palumbo, E.; Giussani, E.; Monne, I.; Terregino, C.
EPI3217371	PB2	Netherlands	2021-Dec-03	EPI_ISL_19057417	A/red fox/Netherlands/21040099-006_PB2K/2021	Wageningen Bioveterinary Research	Wageningen Bioveterinary Research	Beerens, Nancy; Harders, Frank; Pritz-Verschuren, Sylvia; Roose, Marit; Venema, Sandra; Germeraad, Evelien; Engelsma, Marc; Heutink, Rene
EPI3217363	PB2	Netherlands	2021-Dec-03	EPI_ISL_19057416	A/red fox/Netherlands/21040099-006_PB2E/2021	Wageningen Bioveterinary Research	Wageningen Bioveterinary Research	Beerens, Nancy; Harders, Frank; Pritz-Verschuren, Sylvia; Roose, Marit; Venema, Sandra; Germeraad, Evelien; Engelsma, Marc; Heutink, Rene
EPI2837093	PB2	Finland	2023-Aug-07	EPI_ISL_18618528	A/arctic-fox/Finland/752/2023	Finnish Food Authority	Finnish Food Authority	Kauppinen, Ari; Kareinen, Lauri; Tammiranta, Niina; Kantala, Tuija; Fusaro, Alice; Gadd, Tuija
EPI2837085	PB2	Finland	2023-Aug-04	EPI_ISL_18618442	A/arctic-fox/Finland/682/2023	Finnish Food Authority	Finnish Food Authority	Kauppinen, Ari; Kareinen, Lauri; Tammiranta, Niina; Kantala, Tuija; Fusaro, Alice; Gadd, Tuija
EPI2760283	PB2	Finland	2023-Jul-10	EPI_ISL_18321745	A/arctic-fox/Finland/HVVI_503_23_23VIR6803-6/2023	Finnish Food Authority	Istituto Zooprofilattico Sperimentale Delle Venezie	Gadd, T.; Tammiranta, N; Kantala, K.; Nokireki, T.; Pastori, A.; Zecchin, B.; Fusaro, A.; Schivo, A.; Salviato, A.; Palumbo, E.; Giussani, E.; Monne, I.; Terregino, C.
EPI2760275	PB2	Finland	2023-Jul-06	EPI_ISL_18321744	A/arctic-fox/Finland/HVVI_491_23_23VIR6803-1/2023	Finnish Food Authority	Istituto Zooprofilattico Sperimentale Delle Venezie	Gadd, T.; Tammiranta, N; Kantala, K.; Nokireki, T.; Pastori, A.; Zecchin, B.; Fusaro, A.; Schivo, A.; Salviato, A.; Palumbo, E.; Giussani, E.; Monne, I.; Terregino, C.
EPI2760267	PB2	Finland	2023-Jul-06	EPI_ISL_18321743	A/arctic-fox/Finland/HVVI_492_23_23VIR6803-2/2023	Finnish Food Authority	Istituto Zooprofilattico Sperimentale Delle Venezie	Gadd, T.; Tammiranta, N; Kantala, K.; Nokireki, T.; Pastori, A.; Zecchin, B.; Fusaro, A.; Schivo, A.; Salviato, A.; Palumbo, E.; Giussani, E.; Monne, I.; Terregino, C.
EPI2755527	PB2	Finland	2023-Jul-10	EPI_ISL_18292967	A/arctic-fox/Finland/501/2023	Finnish Food Authority	Finnish Food Authority	Kauppinen, Ari; Kareinen, Lauri; Tammiranta, Niina; Kantala, Tuija; Fusaro, Alice; Gadd, Tuija
EPI2755499	PB2	Finland	2023-Aug-04	EPI_ISL_18292963	A/arctic-fox/Finland/684/2023	Finnish Food Authority	Finnish Food Authority	Kauppinen, Ari; Kareinen, Lauri; Tammiranta, Niina; Kantala, Tuija; Fusaro, Alice; Giussani, Edoardo; Gadd, Tuija
EPI2755459	PB2	Finland	2023-Aug-01	EPI_ISL_18292958	A/arctic-fox/Finland/675/2023	Finnish Food Authority	Finnish Food Authority	Kauppinen, Ari; Kareinen, Lauri; Tammiranta, Niina; Kantala, Tuija; Fusaro, Alice; Giussani, Edoardo; Gadd, Tuija
EPI2755435	PB2	Finland	2023-Jul-31	EPI_ISL_18292955	A/arctic-fox/Finland/670/2023	Finnish Food Authority	Finnish Food Authority	Kauppinen, Ari; Kareinen, Lauri; Tammiranta, Niina; Kantala, Tuija; Fusaro, Alice; Galiano, Monica; Ikonen, Niina; Lindh, Erika; Gadd, Tuija
EPI2755427	PB2	Finland	2023-Jul-31	EPI_ISL_18292954	A/arctic-fox/Finland/666/2023	Finnish Food Authority	Finnish Food Authority	Kauppinen, Ari; Kareinen, Lauri; Tammiranta, Niina; Kantala, Tuija; Fusaro, Alice; Galiano, Monica; Ikonen, Niina; Lindh, Erika; Gadd, Tuija
EPI2701780	PB2	Finland	2023-Aug-04	EPI_ISL_18131280	A/blue fox/Finland/2023AI06876_071/2023	University of Helsinki, Department of Virology	Friedrich-Loeffler-Institut
EPI2701772	PB2	Finland	2023-Aug-04	EPI_ISL_18131279	A/silver fox/Finland/2023AI06834_029/2023	University of Helsinki, Department of Virology	Friedrich-Loeffler-Institut
EPI2701764	PB2	Finland	2023-Aug-03	EPI_ISL_18131278	A/silver fox/Finland/2023AI06838_033/2023	University of Helsinki, Department of Virology	Friedrich-Loeffler-Institut
EPI2701756	PB2	Finland	2023-Aug-03	EPI_ISL_18131277	A/red fox/Finland/2023AI06879_074/2023	University of Helsinki, Department of Virology	Friedrich-Loeffler-Institut
EPI2701748	PB2	Finland	2023-Aug-03	EPI_ISL_18131276	A/blue fox/Finland/2023AI06820_015/2023	University of Helsinki, Department of Virology	Friedrich-Loeffler-Institut
EPI2235557	PB2	Canada	2022-May-09	EPI_ISL_16003265	A/Red Fox/MB/FAV-414-004/2022	Manitoba Agriculture	Canadian Food Inspection Agency	Alkie, Tamiru; Cox, Sherri; Pople, Neil; Xu, Wanhong; Hisanaga, Tamiko; Suderman, Suderman; Koziuk, Janice; Kruczkiewicz, Peter; Nguyen, Hoang Hai; Fisher, Mathew; Lung, Oliver; Berhane, Yohannes
EPI2197237	PB2	Finland	2021-Nov-01	EPI_ISL_15518271	A/red_fox/Finland/2891_21RS3535-1/2021	Finnish Food Authority	Istituto Zooprofilattico Sperimentale Delle Venezie	Tammiranta, N.;Kantala, T.;Laamanen, I.;Gadd, T.;Zecchin, B.;Fusaro, A.;Schivo, A.;Salviato, A.;Palumbo, E.;Milani, A.;Giussani, E.;Pastori, A.;Monne, I.;Terregino, C.
EPI2197213	PB2	Finland	2021-Sep-01	EPI_ISL_15518268	A/fox/Finland/2844_21VIR9619-1/2021	Finnish Food Authority	Istituto Zooprofilattico Sperimentale Delle Venezie	Tammiranta, N.;Kantala, T.;Laamanen, I.;Gadd, T.;Zecchin, B.;Fusaro, A.;Schivo, A.;Salviato, A.;Palumbo, E.;Giussani, E.;Pastori, A.;Monne, I.;Terregino, C.
EPI2131354	PB2	United States	2022-Apr-25	EPI_ISL_14551957	A/Vulpes vulpes/New_York/088592/2022	Cornell University	Cornell University	Diel, Diego G; Caserta, Leonardo Cardia; Cronk, Brittany D.
EPI2018072	PB2	Netherlands	2022-Jan-10	EPI_ISL_12069288	A/Fox/Netherlands/EMC2/2022	Erasmus Medical Center	Erasmus Medical Center	R.A.M., Fouchier; S., Thewessen; O., Vuong; I., Chestakova; R., Sikkema; P., Lexmond; M., Pronk
EPI1994443	PB2	Netherlands	2022-Mar-01	EPI_ISL_10915976	A/red fox/Netherlands/22004172-003/2022	Wageningen Bioveterinary Research	Wageningen Bioveterinary Research	Beerens, Nancy; Harders, Frank; Pritz-Verschuren, Sylvia; Roose, Marit; Venema, Sandra; Germeraad, Evelien; Engelsma, Marc; Heutink, Rene
EPI1987223	PB2	Netherlands	2022-Feb-08	EPI_ISL_10220428	A/red fox/Netherlands/22002722-004/2022	Wageningen Bioveterinary Research	Wageningen Bioveterinary Research	Beerens, Nancy; Harders, Frank; Pritz-Verschuren, Sylvia; Roose, Marit; Venema, Sandra; Germeraad, Evelien; Engelsma, Marc; Heutink, Rene
EPI1987215	PB2	Netherlands	2022-Feb-07	EPI_ISL_10220427	A/red fox/Netherlands/22002636-005/2022	Wageningen Bioveterinary Research	Wageningen Bioveterinary Research	Beerens, Nancy; Harders, Frank; Pritz-Verschuren, Sylvia; Roose, Marit; Venema, Sandra; Germeraad, Evelien; Engelsma, Marc; Heutink, Rene
EPI1981017	PB2	Netherlands	2022-Jan-31	EPI_ISL_9616272	A/red fox/Netherlands/22002191-003/2022	Wageningen Bioveterinary Research	Wageningen Bioveterinary Research	Beerens, Nancy; Harders, Frank; Pritz-Verschuren, Sylvia; Roose, Marit; Venema, Sandra; Germeraad, Evelien; Engelsma, Marc; Heutink, Rene
EPI1981009	PB2	Netherlands	2022-Jan-31	EPI_ISL_9616271	A/red fox/Netherlands/22002190-003/2022	Wageningen Bioveterinary Research	Wageningen Bioveterinary Research	Beerens, Nancy; Harders, Frank; Pritz-Verschuren, Sylvia; Roose, Marit; Venema, Sandra; Germeraad, Evelien; Engelsma, Marc; Heutink, Rene
EPI1980993	PB2	Netherlands	2022-Jan-27	EPI_ISL_9616265	A/red fox/Netherlands/22001901-005/2022	Wageningen Bioveterinary Research	Wageningen Bioveterinary Research	Beerens, Nancy; Harders, Frank; Pritz-Verschuren, Sylvia; Roose, Marit; Venema, Sandra; Germeraad, Evelien; Engelsma, Marc; Heutink, Rene
EPI1956637	PB2	Netherlands	2022-Jan-03	EPI_ISL_8650947	A/red fox/Netherlands/22000097-004/2022	Wageningen Bioveterinary Research	Wageningen Bioveterinary Research	Beerens, Nancy; Harders, Frank; Pritz-Verschuren, Sylvia; Roose, Marit; Venema, Sandra; Germeraad, Evelien; Engelsma, Marc; Heutink, Rene
EPI1859950	PB2	Netherlands	2021-May-17	EPI_ISL_2194219	A/red fox/Netherlands/21028774-004/2021	Wageningen Bioveterinary Research	Wageningen Bioveterinary Research	Beerens, Nancy; Harders, Frank; Pritz-Verschuren, Sylvia; Roose, Marit; Germeraad, Evelien; Engelsma, Marc; Bossers, Alex; Heutink, Rene
EPI2697592	PB2	Finland	2023-Jul-17	EPI_ISL_18123722	A/arctic-fox/Finland/564/2023	Finnish Food Authority	Finnish Institute for Health and Welfare, THL	Tuija Kantala, Alice Fusaro, Tuija Gadd, Monica Gallo, Niina Ikonen, Lauri Kareinen, Ari Kauppinen, Niina Tammiranta, Erika Lindh
EPI2468402	PB2	Belgium	2023-Mar-02	EPI_ISL_17245141	A/Vulpes_vulpes/Belgium/01924_0003/2023	Sciensano - Animal Infectious Diseases	Sciensano, Department of Animal Infectious Diseases	Van Borm, Steven; Roupie, Virginie; Hostyn, Pierre; Mathijs, Elisabeth; Lambrecht, Benedicte; Steensels, Mieke
EPI2468393	PB2	Belgium	2023-Feb-27	EPI_ISL_17245099	A/Vulpes_vulpes/Belgium/01784_0010/2023	Sciensano - Animal Infectious Diseases	Sciensano, Department of Animal Infectious Diseases	Van Borm, Steven; Roupie, Virginie; Hostyn, Pierre; Mathijs, Elisabeth; Lambrecht, Benedicte; Steensels, Mieke
EPI2468385	PB2	Belgium	2023-Feb-27	EPI_ISL_17245098	A/Vulpes_vulpes/Belgium/01784_0008/2023	Sciensano - Animal Infectious Diseases	Sciensano, Department of Animal Infectious Diseases	Van Borm, Steven; Roupie, Virginie; Hostyn, Pierre; Mathijs, Elisabeth; Lambrecht, Benedicte; Steensels, Mieke
EPI2468377	PB2	Belgium	2023-Feb-27	EPI_ISL_17244973	A/Vulpes_vulpes/Belgium/01784_0004/2023	Sciensano - Animal Infectious Diseases	Sciensano, Department of Animal Infectious Diseases	Van Borm, Steven; Roupie, Virginie; Hostyn, Pierre; Mathijs, Elisabeth; Lambrecht, Benedicte; Steensels, Mieke
EPI2856939	PB2	Canada	2023-Aug-22	EPI_ISL_18665627	A/Red_Fox/BC/AIVPHL-1286/2023	B.C. Centre for Disease Control	Public Health Agency of Canada	Himsworth, Chelsea; Prystajecky,Natalie; Tyson,John; Jassem,Agatha; Kuchinski,Kevin; Coombe, Michelle; Lee,Tracy; Azana,Rob; Fung,Janet; Chan,Michael; Cheung,Branco; Caleta,Jessica; Tsang,Frankie; Yang,Kevin; Russell,Shannon; Zlosnik,James; Hoang,Linda
EPI2782082	PB2	Norway	2022-Jul-26	EPI_ISL_18455203	A/Red_fox/Norway/2022-07-1768-2T/2022	Norwegian Veterinary Institute	Norwegian Veterinary Institute	Britt Gjerset, Cathrine Arnason B√∏e
EPI2677001	PB2	United States	2022-May-27	EPI_ISL_18090482	A/red fox/Michigan/22-018712-003/2022	National Veterinary Services Laboratories - USDA	National Veterinary Services Laboratories - USDA	Chinh,Thanh;Franzen,Kerrie;Love,Emily;Ozella,Mikaela;Killian,Mary;Lantz,Kristina;Stuber,Tod;Hicks,Jessica;Norris,Cameron
EPI2540329	PB2	Belgium	2023-Mar-29	EPI_ISL_17606758	A/Vulpes_vulpes/Belgium/03117_0004/2023	Sciensano - Animal Infectious Diseases	Sciensano, Department of Animal Infectious Diseases	Van Borm, Steven; Roupie, Virginie; Hostyn, Pierre; Mathijs, Elisabeth; Lambrecht, Benedicte; Steensels, Mieke
EPI2540319	PB2	Belgium	2023-Mar-29	EPI_ISL_17606757	A/Vulpes_vulpes/Belgium/03117_0001/2023	Sciensano - Animal Infectious Diseases	Sciensano, Department of Animal Infectious Diseases	Van Borm, Steven; Roupie, Virginie; Hostyn, Pierre; Mathijs, Elisabeth; Lambrecht, Benedicte; Steensels, Mieke
EPI2540311	PB2	Belgium	2023-Mar-14	EPI_ISL_17606756	A/Vulpes_vulpes/Belgium/02359_0006/2023	Sciensano - Animal Infectious Diseases	Sciensano, Department of Animal Infectious Diseases	Van Borm, Steven; Roupie, Virginie; Hostyn, Pierre; Mathijs, Elisabeth; Lambrecht, Benedicte; Steensels, Mieke
EPI2540304	PB2	Belgium	2023-Mar-14	EPI_ISL_17606755	A/Vulpes_vulpes/Belgium/02359_0002/2023	Sciensano - Animal Infectious Diseases	Sciensano, Department of Animal Infectious Diseases	Van Borm, Steven; Roupie, Virginie; Hostyn, Pierre; Mathijs, Elisabeth; Lambrecht, Benedicte; Steensels, Mieke
EPI2513404	PB2	Canada	2023-Jan-31	EPI_ISL_17494318	A/Red Fox/NL/FAV-0075/2023	Atlantic Veterinary College, University of Prince Edward Island	Canadian Food Inspection Agency	Parma, L; Hisanaga, T; Xu, W; Alkie, T; Jones, M; Yason, C; Lung, O; Berhane, Y
EPI2576154	PB2	Denmark	2022-Apr-28	EPI_ISL_17447440	A/red fox/Denmark/08658-3.02-2/2022	Statens Serumm Institute	Statens Serum Institute	Hjulsager,Charlotte;Liang,Yuan
EPI2576138	PB2	Denmark	2022-Apr-28	EPI_ISL_17447413	A/red fox/Denmark/08658-1.01/2022	Statens Serumm Institute	Statens Serum Institute	Hjulsager,Charlotte; Liang,Yuan
EPI2576130	PB2	Denmark	2022-Jan-17	EPI_ISL_17447412	A/red fox/Denmark/01679-1.01-2/2022	Statens Serum Institute	Statens Serum Institute	Hjulsager,Charlotte; Liang,Yuan
EPI2500046	PB2	Canada	2022-May-19	EPI_ISL_17394088	A/Red Fox/PEI/FAV-0544-P1/2022	Atlantic Veterinary College, University of Prince Edward Island	Canadian Food Inspection Agency	Alkie, T; Yason, C; Jones, M; Xu, W; Hisanaga, T; Koziuk, T; Fisher, M; Lung, O; Berhane, Y
EPI2473765	PB2	United States	2022-Jul-06	EPI_ISL_17260687	A/red fox/Michigan/22-021733-007/2022	National Veterinary Services Laboratories - USDA	National Veterinary Services Laboratories - USDA	Chinh,Thanh;Franzen,Kerrie;Love,Emily;Killian,Mary;Koster,Leo;Lantz,Kristina;Stuber,Tod;Hicks,Jessica;Norris,Cameron
EPI2473752	PB2	United States	2022-Jul-06	EPI_ISL_17260686	A/red fox/Michigan/22-021733-005/2022	National Veterinary Services Laboratories - USDA	National Veterinary Services Laboratories - USDA	Chinh,Thanh;Franzen,Kerrie;Love,Emily;Killian,Mary;Koster,Leo;Lantz,Kristina;Stuber,Tod;Hicks,Jessica;Norris,Cameron
EPI2473733	PB2	United States	2022-Jul-06	EPI_ISL_17260685	A/red fox/Michigan/22-021733-003/2022	National Veterinary Services Laboratories - USDA	National Veterinary Services Laboratories - USDA	Chinh,Thanh;Franzen,Kerrie;Love,Emily;Killian,Mary;Koster,Leo;Lantz,Kristina;Stuber,Tod;Hicks,Jessica;Norris,Cameron
EPI2473715	PB2	United States	2022-Jul-06	EPI_ISL_17260684	A/red fox/Michigan/22-021733-002/2022	National Veterinary Services Laboratories - USDA	National Veterinary Services Laboratories - USDA	Chinh,Thanh;Franzen,Kerrie;Love,Emily;Killian,Mary;Koster,Leo;Lantz,Kristina;Stuber,Tod;Hicks,Jessica;Norris,Cameron
EPI2473669	PB2	United States	2022-Jun-15	EPI_ISL_17260681	A/red fox/Alaska/22-019272-001/2022	National Veterinary Services Laboratories - USDA	National Veterinary Services Laboratories - USDA	Chinh,Thanh;Franzen,Kerrie;Love,Emily;Killian,Mary;Koster,Leo;Lantz,Kristina;Stuber,Tod;Hicks,Jessica;Norris,Cameron
EPI2473641	PB2	United States	2022-May-27	EPI_ISL_17260679	A/red fox/Michigan/22-018712-005/2022	National Veterinary Services Laboratories - USDA	National Veterinary Services Laboratories - USDA	Chinh,Thanh;Franzen,Kerrie;Love,Emily;Killian,Mary;Koster,Leo;Lantz,Kristina;Stuber,Tod;Hicks,Jessica;Norris,Cameron
EPI2473627	PB2	United States	2022-May-10	EPI_ISL_17260678	A/red fox/Michigan/22-017507-008/2022	National Veterinary Services Laboratories - USDA	National Veterinary Services Laboratories - USDA	Chinh,Thanh;Franzen,Kerrie;Love,Emily;Killian,Mary;Koster,Leo;Lantz,Kristina;Stuber,Tod;Hicks,Jessica;Norris,Cameron
EPI2473613	PB2	United States	2022-May-05	EPI_ISL_17260677	A/red fox/Michigan/22-017507-007/2022	National Veterinary Services Laboratories - USDA	National Veterinary Services Laboratories - USDA	Chinh,Thanh;Franzen,Kerrie;Love,Emily;Killian,Mary;Koster,Leo;Lantz,Kristina;Stuber,Tod;Hicks,Jessica;Norris,Cameron
EPI2473599	PB2	United States	2022-May-18	EPI_ISL_17260676	A/red fox/Michigan/22-017507-006/2022	National Veterinary Services Laboratories - USDA	National Veterinary Services Laboratories - USDA	Chinh,Thanh;Franzen,Kerrie;Love,Emily;Killian,Mary;Koster,Leo;Lantz,Kristina;Stuber,Tod;Hicks,Jessica;Norris,Cameron
EPI2473571	PB2	United States	2022-May-23	EPI_ISL_17260674	A/red fox/North Dakota/22-017061-002/2022	National Veterinary Services Laboratories - USDA	National Veterinary Services Laboratories - USDA	Chinh,Thanh;Franzen,Kerrie;Love,Emily;Killian,Mary;Koster,Leo;Lantz,Kristina;Stuber,Tod;Hicks,Jessica;Norris,Cameron
EPI2473557	PB2	United States	2022-May-23	EPI_ISL_17260673	A/red fox/North Dakota/22-017061-001/2022	National Veterinary Services Laboratories - USDA	National Veterinary Services Laboratories - USDA	Chinh,Thanh;Franzen,Kerrie;Love,Emily;Killian,Mary;Koster,Leo;Lantz,Kristina;Stuber,Tod;Hicks,Jessica;Norris,Cameron
EPI2473543	PB2	United States	2022-Jan-01	EPI_ISL_17260672	A/red fox/Minnesota/22-017056-001/2022	National Veterinary Services Laboratories - USDA	National Veterinary Services Laboratories - USDA	Chinh,Thanh;Franzen,Kerrie;Love,Emily;Killian,Mary;Koster,Leo;Lantz,Kristina;Stuber,Tod;Hicks,Jessica;Norris,Cameron
EPI2473515	PB2	United States	2022-May-24	EPI_ISL_17260670	A/fox/Utah/22-016402-001/2022	National Veterinary Services Laboratories - USDA	National Veterinary Services Laboratories - USDA	Chinh,Thanh;Franzen,Kerrie;Love,Emily;Killian,Mary;Koster,Leo;Lantz,Kristina;Stuber,Tod;Hicks,Jessica;Norris,Cameron
EPI2473501	PB2	United States	2022-May-10	EPI_ISL_17260669	A/red fox/Alaska/22-016300-001/2022	National Veterinary Services Laboratories - USDA	National Veterinary Services Laboratories - USDA	Chinh,Thanh;Franzen,Kerrie;Love,Emily;Killian,Mary;Koster,Leo;Lantz,Kristina;Stuber,Tod;Hicks,Jessica;Norris,Cameron
EPI2473476	PB2	United States	2022-May-06	EPI_ISL_17260667	A/fox/Wisconsin/22-014746-026/2022	National Veterinary Services Laboratories - USDA	National Veterinary Services Laboratories - USDA	Chinh,Thanh;Franzen,Kerrie;Love,Emily;Killian,Mary;Koster,Leo;Lantz,Kristina;Stuber,Tod;Hicks,Jessica;Norris,Cameron
EPI2473462	PB2	United States	2022-May-06	EPI_ISL_17260666	A/fox/Wisconsin/22-014746-021/2022	National Veterinary Services Laboratories - USDA	National Veterinary Services Laboratories - USDA	Chinh,Thanh;Franzen,Kerrie;Love,Emily;Killian,Mary;Koster,Leo;Lantz,Kristina;Stuber,Tod;Hicks,Jessica;Norris,Cameron
EPI2473449	PB2	United States	2022-May-03	EPI_ISL_17260665	A/fox/Wisconsin/22-014746-015/2022	National Veterinary Services Laboratories - USDA	National Veterinary Services Laboratories - USDA	Chinh,Thanh;Franzen,Kerrie;Love,Emily;Killian,Mary;Koster,Leo;Lantz,Kristina;Stuber,Tod;Hicks,Jessica;Norris,Cameron
EPI2473435	PB2	United States	2022-Apr-19	EPI_ISL_17260664	A/fox/Wisconsin/22-014746-007/2022	National Veterinary Services Laboratories - USDA	National Veterinary Services Laboratories - USDA	Chinh,Thanh;Franzen,Kerrie;Love,Emily;Killian,Mary;Koster,Leo;Lantz,Kristina;Stuber,Tod;Hicks,Jessica;Norris,Cameron
EPI2473422	PB2	United States	2022-May-09	EPI_ISL_17260663	A/red fox/Minnesota/22-014661-002/2022	National Veterinary Services Laboratories - USDA	National Veterinary Services Laboratories - USDA	Chinh,Thanh;Franzen,Kerrie;Love,Emily;Killian,Mary;Koster,Leo;Lantz,Kristina;Stuber,Tod;Hicks,Jessica;Norris,Cameron
EPI2473408	PB2	United States	2022-May-01	EPI_ISL_17260662	A/fox/Wisconsin/22-013774-013/2022	National Veterinary Services Laboratories - USDA	National Veterinary Services Laboratories - USDA	Chinh,Thanh;Franzen,Kerrie;Love,Emily;Killian,Mary;Koster,Leo;Lantz,Kristina;Stuber,Tod;Hicks,Jessica;Norris,Cameron
EPI2473395	PB2	United States	2022-May-01	EPI_ISL_17260661	A/fox/Wisconsin/22-013774-008/2022	National Veterinary Services Laboratories - USDA	National Veterinary Services Laboratories - USDA	Chinh,Thanh;Franzen,Kerrie;Love,Emily;Killian,Mary;Koster,Leo;Lantz,Kristina;Stuber,Tod;Hicks,Jessica;Norris,Cameron
EPI2437465	PB2	United Kingdom	2022-Aug-23	EPI_ISL_17072388	A/fox/England/015850/2022	Animal and Plant Health Agency (APHA)	Animal and Plant Health Agency (APHA)
EPI2274955	PB2	Canada	2022-May-05	EPI_ISL_16367899	A/Red Fox/SK/FAV-0824-96/2022	Western College of Veterinary Medicine, University of Saskatchewan	Canadian Food Inspection Agency
EPI2259124	PB2	United States	2022-Apr-27	EPI_ISL_16243273	A/fox/New York/22-015065-001/2022	National Veterinary Services Laboratories - USDA	National Veterinary Services Laboratories - USDA	Chinh,Thanh;Love, Emily;Franzen,Kerrie;Killian,Mary;Koster,Leo;Lantz,Kristina;Stuber,Tod;Hicks,Jessica
EPI2259116	PB2	United States	2022-Apr-27	EPI_ISL_16243264	A/fox/New York/22-015064-001/2022	National Veterinary Services Laboratories - USDA	National Veterinary Services Laboratories - USDA	Chinh,Thanh;Love, Emily;Franzen,Kerrie;Killian,Mary;Koster,Leo;Lantz,Kristina;Stuber,Tod;Hicks,Jessica
EPI2259108	PB2	United States	2022-Apr-15	EPI_ISL_16243253	A/fox/New York/22-015063-001/2022	National Veterinary Services Laboratories - USDA	National Veterinary Services Laboratories - USDA	Chinh,Thanh;Love, Emily;Franzen,Kerrie;Killian,Mary;Koster,Leo;Lantz,Kristina;Stuber,Tod;Hicks,Jessica
EPI2236543	PB2	Canada	2022-May-19	EPI_ISL_16022233	A/Red Fox/SK/FAV-0548-03/2022	Western College of Veterinary Medicine, University of Saskatchewan	Canadian Food Inspection Agency	Alkie, Tamiru; Maria B, Araya; Xu, Wanhong; Hisanaga, Tamiko; Suderman, Suderman; Koziuk, Janice; Kruczkiewicz, Peter; Nguyen, Hoang Hai; Fisher, Mathew; Lung, Oliver; Berhane, Yohannes
EPI2236522	PB2	Canada	2022-Jun-28	EPI_ISL_16021854	A/Red Fox/NS/FAV-0879/2022	Atlantic Veterinary College, University of Prince Edward Island	Canadian Food Inspection Agency	Alkie, Tamiru; Yason, Carmencita; Jones, E.B. Megan; Bourque, Laura; Xu, Wanhong; Hisanaga, Tamiko; Suderman, Suderman; Koziuk, Janice; Kruczkiewicz, Peter; Nguyen, Hoang Hai; Fisher, Mathew; Lung, Oliver; Berhane, Yohannes
EPI2236514	PB2	Canada	2022-May-19	EPI_ISL_16021788	A/Red Fox/NS/FAV-0543/2022	Atlantic Veterinary College, University of Prince Edward Island	Canadian Food Inspection Agency	Alkie, Tamiru; Yason, Carmencita; Jones, E.B. Megan; Bourque, Laura; Xu, Wanhong; Hisanaga, Tamiko; Suderman, Suderman; Koziuk, Janice; Kruczkiewicz, Peter; Nguyen, Hoang Hai; Fisher, Mathew; Lung, Oliver; Berhane, Yohannes
EPI2236506	PB2	Canada	2022-May-24	EPI_ISL_16021587	A/Red Fox/PEI/FAV-0591-02/2022	Atlantic Veterinary College, University of Prince Edward Island	Canadian Food Inspection Agency	Alkie, Tamiru; Yason, Carmencita; Jones, E.B. Megan; Bourque, Laura; Xu, Wanhong; Hisanaga, Tamiko; Suderman, Suderman; Koziuk, Janice; Kruczkiewicz, Peter; Nguyen, Hoang Hai; Fisher, Mathew; Lung, Oliver; Berhane, Yohannes
EPI2236229	PB2	Canada	2022-Apr-12	EPI_ISL_16014112	A/Red Fox/ON/FAV-0300-01/2022	Ontario Veterinary College, University of Guelph	Canadian Food Inspection Agency	Alkie, Tamiru; Cox, Sherri; Ojkic, Davor; Stevens, Brian; Xu, Wanhong; Hisanaga, Tamiko; Suderman, Suderman; Koziuk, Janice; Kruczkiewicz, Peter; Nguyen, Hoang Hai; Fisher, Mathew; Lung, Oliver; Berhane, Yohannes
EPI2236221	PB2	Canada	2022-Apr-03	EPI_ISL_16013993	A/Red Fox/ON/FAV-0873/2022	Ontario Veterinary College, University of Guelph	Canadian Food Inspection Agency	Alkie, Tamiru; Cox, Sherri; Ojkic, Davor; Stevens, Brian; Xu, Wanhong; Hisanaga, Tamiko; Suderman, Suderman; Koziuk, Janice; Kruczkiewicz, Peter; Nguyen, Hoang Hai; Fisher, Mathew; Lung, Oliver; Berhane, Yohannes
EPI2236213	PB2	Canada	2022-May-31	EPI_ISL_16013990	A/Red Fox/ON/FAV-0773-01/2022	Ontario Veterinary College, University of Guelph	Canadian Food Inspection Agency	Alkie, Tamiru; Cox, Sherri; Ojkic, Davor; Stevens, Brian; Xu, Wanhong; Hisanaga, Tamiko; Suderman, Suderman; Koziuk, Janice; Kruczkiewicz, Peter; Nguyen, Hoang Hai; Fisher, Mathew; Lung, Oliver; Berhane, Yohannes
EPI2236205	PB2	Canada	2022-May-11	EPI_ISL_16013987	A/Red Fox/ON/FAV-0529-03/2022	Ontario Veterinary College, University of Guelph	Canadian Food Inspection Agency	Alkie, Tamiru; Cox, Sherri; Ojkic, Davor; Stevens, Brian; Xu, Wanhong; Hisanaga, Tamiko; Suderman, Suderman; Koziuk, Janice; Kruczkiewicz, Peter; Nguyen, Hoang Hai; Fisher, Mathew; Lung, Oliver; Berhane, Yohannes
EPI2236197	PB2	Canada	2022-May-19	EPI_ISL_16013986	A/Red Fox/ON/FAV-0529-02/2022	Ontario Veterinary College, University of Guelph	Canadian Food Inspection Agency	Alkie, Tamiru; Cox, Sherri; Ojkic, Davor; Stevens, Brian; Xu, Wanhong; Hisanaga, Tamiko; Suderman, Suderman; Koziuk, Janice; Kruczkiewicz, Peter; Nguyen, Hoang Hai; Fisher, Mathew; Lung, Oliver; Berhane, Yohannes
EPI2235597	PB2	Canada	2022-Apr-27	EPI_ISL_16003275	A/Red Fox/ON/FAV-0605-01/2022	Ontario Veterinary College, University of Guelph	Canadian Food Inspection Agency	Alkie, Tamiru; Cox, Sherri; Ojkic, Davor; Stevens, Brian; Xu, Wanhong; Hisanaga, Tamiko; Suderman, Suderman; Koziuk, Janice; Kruczkiewicz, Peter; Nguyen, Hoang Hai; Fisher, Mathew; Lung, Oliver; Berhane, Yohannes
EPI2235589	PB2	Canada	2022-May-05	EPI_ISL_16003270	A/Red Fox/ON/FAV-0605-02/2022	Ontario Veterinary College, University of Guelph	Canadian Food Inspection Agency	Alkie, Tamiru; Cox, Sherri; Ojkic, Davor; Stevens, Brian; Xu, Wanhong; Hisanaga, Tamiko; Suderman, Suderman; Koziuk, Janice; Kruczkiewicz, Peter; Nguyen, Hoang Hai; Fisher, Mathew; Lung, Oliver; Berhane, Yohannes
EPI2235573	PB2	Canada	2022-May-09	EPI_ISL_16003267	A/Red Fox/MB/FAV-0414-12/2022	Manitoba Agriculture	Canadian Food Inspection Agency	Alkie, Tamiru; Cox, Sherri; Pople, Neil; Xu, Wanhong; Hisanaga, Tamiko; Suderman, Suderman; Koziuk, Janice; Kruczkiewicz, Peter; Nguyen, Hoang Hai; Fisher, Mathew; Lung, Oliver; Berhane, Yohannes
EPI2235565	PB2	Canada	2022-May-09	EPI_ISL_16003266	A/Red Fox/MB/FAV-414-08/2022	Manitoba Agriculture	Canadian Food Inspection Agency	Alkie, Tamiru; Cox, Sherri; Pople, Neil; Xu, Wanhong; Hisanaga, Tamiko; Suderman, Suderman; Koziuk, Janice; Kruczkiewicz, Peter; Nguyen, Hoang Hai; Fisher, Mathew; Lung, Oliver; Berhane, Yohannes
EPI2235549	PB2	Canada	2022-Apr-07	EPI_ISL_16003253	A/Red Fox/MB/FAV-370-01/2022	Manitoba Agriculture	Canadian Food Inspection Agency	Alkie, Tamiru; Cox, Sherri; Pople, Neil; Xu, Wanhong; Hisanaga, Tamiko; Suderman, Suderman; Koziuk, Janice; Kruczkiewicz, Peter; Nguyen, Hoang Hai; Fisher, Mathew; Lung, Oliver; Berhane, Yohannes
EPI2182124	PB2	United States	2022-Jun-08	EPI_ISL_15078253	A/red fox/Michigan/22-018712-001/2022	National Veterinary Services Laboratories - USDA	National Veterinary Services Laboratories - USDA	Chinh,Thanh;Love, Emily;Franzen,Kerrie;Killian,Mary;Koster,Leo;Lantz,Kristina;Stuber,Tod;Hicks,Jessica
EPI2182108	PB2	United States	2022-Jun-03	EPI_ISL_15078251	A/red fox/North Dakota/22-017354-001/2022	National Veterinary Services Laboratories - USDA	National Veterinary Services Laboratories - USDA	Chinh,Thanh;Love, Emily;Franzen,Kerrie;Killian,Mary;Koster,Leo;Lantz,Kristina;Stuber,Tod;Hicks,Jessica
EPI2182092	PB2	United States	2022-May-13	EPI_ISL_15078249	A/fox/Minnesota/22-016487-001/2022	National Veterinary Services Laboratories - USDA	National Veterinary Services Laboratories - USDA	Chinh,Thanh;Love, Emily;Franzen,Kerrie;Killian,Mary;Koster,Leo;Lantz,Kristina;Stuber,Tod;Hicks,Jessica
EPI2182076	PB2	United States	2022-May-06	EPI_ISL_15078247	A/fox/Wisconsin/22-014746-030/2022	National Veterinary Services Laboratories - USDA	National Veterinary Services Laboratories - USDA	Chinh,Thanh;Love, Emily;Franzen,Kerrie;Killian,Mary;Koster,Leo;Lantz,Kristina;Stuber,Tod;Hicks,Jessica
EPI2182068	PB2	United States	2022-May-03	EPI_ISL_15078246	A/fox/Wisconsin/22-014746-008/2022	National Veterinary Services Laboratories - USDA	National Veterinary Services Laboratories - USDA	Chinh,Thanh;Love, Emily;Franzen,Kerrie;Killian,Mary;Koster,Leo;Lantz,Kristina;Stuber,Tod;Hicks,Jessica
EPI2182060	PB2	United States	2022-Apr-22	EPI_ISL_15078245	A/fox/Michigan/22-014536-004/2022	National Veterinary Services Laboratories - USDA	National Veterinary Services Laboratories - USDA	Chinh,Thanh;Love, Emily;Franzen,Kerrie;Killian,Mary;Koster,Leo;Lantz,Kristina;Stuber,Tod;Hicks,Jessica
EPI2158629	PB2	United Kingdom	2021-Dec-07	EPI_ISL_14864640	A/fox/England/M0025-12-21/2021	Animal and Plant Health Agency (APHA)	Animal and Plant Health Agency (APHA)
EPI2158613	PB2	United Kingdom	2022-Mar-09	EPI_ISL_14864638	A/fox/England/M0083-03-22/2022	Animal and Plant Health Agency (APHA)	Animal and Plant Health Agency (APHA)
EPI2131399	PB2	United States	2022-May-12	EPI_ISL_14553997	A/Vulpes vulpes/New_York/115912/2022	Cornell University	Cornell University	Diel, Diego G; Caserta, Leonardo Cardia; Cronk, Brittany D.
EPI2131386	PB2	United States	2022-May-10	EPI_ISL_14553811	A/Vulpes vulpes/New_York/103994/2022	Cornell University	Cornell University
EPI2131375	PB2	United States	2022-Apr-04	EPI_ISL_14553810	A/Vulpes vulpes/New_York/099488/2022	Cornell University	Cornell University	Diel, Diego G; Caserta, Leonardo Cardia; Cronk, Brittany D.
EPI2130818	PB2	United States	2022-Apr-04	EPI_ISL_14533193	A/Vulpes vulpes/New_York/074441/2022	Cornell University	Cornell University	Diel,Diego G; Caserta,Leonardo Cardia; Cronk, Brittany D
EPI2129813	PB2	Belgium	2022-Apr-16	EPI_ISL_14493899	A/Vulpes_vulpes/Belgium/8660_0016/2022	Sciensano - Animal Infectious Diseases	Sciensano, Department of Animal Infectious Diseases	Van Borm, Steven; Mathijs, Elisabeth; Roupie, Virginie; Vervaeke, Muriel; Lambrecht, Benedicte; Steensels, Mieke
EPI1945582	PB2	Estonia	2021-Nov-08	EPI_ISL_7778880	A/Red_fox/Estonia/TA2126820_21VIR10433-13/2021	Estonian Veterinary and Food Laboratory	Istituto Zooprofilattico Sperimentale Delle Venezie	Nurmoja, I.; Vilem, A.; Juurik, T.; Zecchin, B.; Fusaro, A.; Schivo, A.; Salviato, A.; Palumbo, E.; Milani, A.; Giussani, E.; Pastori, A.; Monne, I.; Terregino, C.
EPI1859942	PB2	Netherlands	2021-May-17	EPI_ISL_2194218	A/red fox/Netherlands/21028774-002/2021	Wageningen Bioveterinary Research	Wageningen Bioveterinary Research	Beerens, Nancy; Harders, Frank; Pritz-Verschuren, Sylvia; Roose, Marit; Germeraad, Evelien; Engelsma, Marc; Bossers, Alex; Heutink, Rene
EPI2914887	PB2	Finland	2023-Aug-03	EPI_ISL_18764855	A/blue fox/Finland/UH-004-E1/2023	University of Helsinki, Department of Virology	Finnish Institute for Health and Welfare, THL	Altan, E ; Avelin, V; Lindh, E; Kakkola, L; Tammiranta, N; Nokireki, T; Gadd, T; Ikonen, N; Savolainen-Kopra, C; Sironen, T; √ñsterlund, P.
EPI2892565	PB2	Finland	2023-Aug-01	EPI_ISL_18728100	A/arctic-fox/Finland/677/2023	Finnish Food Authority	Finnish Food Authority	Kauppinen, Ari; Kareinen, Lauri; Tammiranta, Niina; Kantala, Tuija; Fusaro, Alice; Giussani, Edoardo; Gadd, Tuija
EPI2794118	PB2	Latvia	2023-May-25	EPI_ISL_18509071	A/fox/Latvia/34393_23VIR8835-1/2023	Institute of Food Safety, Animal Health and Environment "BIOR"	Istituto Zooprofilattico Sperimentale Delle Venezie	Krivko, L.; Pastori, A.; Zecchin, B.; Fusaro, A.; Schivo, A.; Salviato, A.; Palumbo, E.; Giussani, E.; Monne, I.; Terregino, C.
EPI2755723	PB2	Finland	2023-Aug-21	EPI_ISL_18290490	A/arctic-fox/Finland/1909/2023	Finnish Food Authority	Finnish Food Authority	Kauppinen, Ari; Kareinen, Lauri; Tammiranta, Niina; Kantala, Tuija; Fusaro, Alice; Gadd, Tuija
EPI2755715	PB2	Finland	2023-Aug-21	EPI_ISL_18290489	A/arctic-fox/Finland/1908/2023	Finnish Food Authority	Finnish Food Authority	Kauppinen, Ari; Kareinen, Lauri; Tammiranta, Niina; Kantala, Tuija; Fusaro, Alice; Gadd, Tuija
EPI2755687	PB2	Finland	2023-Aug-10	EPI_ISL_18290484	A/fox/Finland/1361/2023	Finnish Food Authority	Finnish Food Authority	Kauppinen, Ari; Kareinen, Lauri; Tammiranta, Niina; Kantala, Tuija; Fusaro, Alice; Gadd, Tuija
EPI2755672	PB2	Finland	2023-Aug-10	EPI_ISL_18290482	A/arctic-fox/Finland/966/2023	Finnish Food Authority	Finnish Food Authority	Kauppinen, Ari; Kareinen, Lauri; Tammiranta, Niina; Kantala, Tuija; Fusaro, Alice; Gadd, Tuija
EPI2755664	PB2	Finland	2023-Aug-07	EPI_ISL_18290481	A/arctic-fox/Finland/738/2023	Finnish Food Authority	Finnish Food Authority	Kauppinen, Ari; Kareinen, Lauri; Tammiranta, Niina; Kantala, Tuija; Fusaro, Alice; Gadd, Tuija
EPI2755626	PB2	Finland	2023-Aug-09	EPI_ISL_18290476	A/arctic-fox/Finland/1086/2023	Finnish Food Authority	Finnish Food Authority	Kauppinen, Ari; Kareinen, Lauri; Tammiranta, Niina; Kantala, Tuija; Fusaro, Alice; Gadd, Tuija
EPI2755612	PB2	Finland	2023-Aug-08	EPI_ISL_18290474	A/arctic-fox/Finland/783/2023	Finnish Food Authority	Finnish Food Authority	Kauppinen, Ari; Kareinen, Lauri; Tammiranta, Niina; Kantala, Tuija; Fusaro, Alice; Gadd, Tuija
EPI2755604	PB2	Finland	2023-Aug-07	EPI_ISL_18290473	A/arctic-fox/Finland/736/2023	Finnish Food Authority	Finnish Food Authority	Kauppinen, Ari; Kareinen, Lauri; Tammiranta, Niina; Kantala, Tuija; Fusaro, Alice; Gadd, Tuija
EPI2755596	PB2	Finland	2023-Aug-01	EPI_ISL_18290472	A/arctic-fox/Finland/674/2023	Finnish Food Authority	Finnish Food Authority	Kauppinen, Ari; Kareinen, Lauri; Tammiranta, Niina; Kantala, Tuija; Fusaro, Alice; Gadd, Tuija
EPI2755588	PB2	Finland	2023-Aug-01	EPI_ISL_18290471	A/arctic-fox/Finland/673/2023	Finnish Food Authority	Finnish Food Authority	Kauppinen, Ari; Kareinen, Lauri; Tammiranta, Niina; Kantala, Tuija; Fusaro, Alice; Gadd, Tuija
EPI2755580	PB2	Finland	2023-Jul-18	EPI_ISL_18290470	A/arctic-fox/Finland/578/2023	Finnish Food Authority	Finnish Food Authority	Kauppinen, Ari; Kareinen, Lauri; Tammiranta, Niina; Kantala, Tuija; Fusaro, Alice; Gadd, Tuija
EPI2641476	PB2	Finland	2023-Jul-10	EPI_ISL_18011223	A/arctic-fox/Finland/504_23VIR6803-7/2023	Finnish Food Authority	Istituto Zooprofilattico Sperimentale Delle Venezie	Kantala, T.;Kauppinen, A.;Kareinen, L.;Gadd, T.;Galiano, M.;Ikonen, N.;Lindh, E.;Ormelli, S.;Varotto, M.;Zecchin, B.;Pastori, A.;Fusaro, A.;Zamperin, G.;Monne, I.;Terregino, C
EPI2641468	PB2	Finland	2023-Jul-10	EPI_ISL_18011222	A/arctic-fox/Finland/497_23VIR6803-5/2023	Finnish Food Authority	Istituto Zooprofilattico Sperimentale Delle Venezie	Kantala, T.;Kauppinen, A.;Kareinen, L.;Gadd, T.;Galiano, M.;Ikonen, N.;Lindh, E.;Ormelli, S.;Varotto, M.;Zecchin, B.;Pastori, A.;Fusaro, A.;Zamperin, G.;Monne, I.;Terregino, C
EPI2559540	PB2	Italy	2023-Apr-07	EPI_ISL_17679728	A/fox/Italy/23VIR3885-1/2023	Istituto Zooprofilattico Sperimentale delle Venezie, EU/OIE/Reference Laboratory and FAO Reference Centre for AI and ND	Istituto Zooprofilattico Sperimentale Delle Venezie	Pastori, A.; Zecchin, B.; Fusaro, A.; Schivo, A.; Salviato, A.; Palumbo, E.; Giussani, E.; Monne, I.; Terregino, C.
EPI1995279	PB2	Netherlands	2022-Feb-07	EPI_ISL_11019882	A/red fox/Netherlands/22002636-002/2022	Wageningen Bioveterinary Research	Wageningen Bioveterinary Research	Beerens, Nancy; Harders, Frank; Pritz-Verschuren, Sylvia; Roose, Marit; Venema, Sandra; Germeraad, Evelien; Engelsma, Marc; Heutink, Rene
EPI1995270	PB2	Netherlands	2022-Jan-03	EPI_ISL_11019784	A/red fox/Netherlands/22000097-005/2022	Wageningen Bioveterinary Research	Wageningen Bioveterinary Research	Beerens, Nancy; Harders, Frank; Pritz-Verschuren, Sylvia; Roose, Marit; Venema, Sandra; Germeraad, Evelien; Engelsma, Marc; Heutink, Rene
EPI1988050	PB2	Netherlands	2022-Feb-18	EPI_ISL_10454887	A/red fox/Netherlands/22003495-003/2022	Wageningen Bioveterinary Research	Wageningen Bioveterinary Research	Beerens, Nancy; Harders, Frank; Pritz-Verschuren, Sylvia; Roose, Marit; Venema, Sandra; Germeraad, Evelien; Engelsma, Marc; Heutink, Rene
EPI1987361	PB2	Netherlands	2022-Feb-11	EPI_ISL_10255587	A/red fox/Netherlands/22002993-003 /2022	Wageningen Bioveterinary Research	Wageningen Bioveterinary Research	Beerens, Nancy; Harders, Frank; Pritz-Verschuren, Sylvia; Roose, Marit; Venema, Sandra; Germeraad, Evelien; Engelsma, Marc; Heutink, Rene
EPI1987353	PB2	Netherlands	2022-Feb-11	EPI_ISL_10255581	A/red fox/Netherlands/22002992-003/2022	Wageningen Bioveterinary Research	Wageningen Bioveterinary Research	Beerens, Nancy; Harders, Frank; Pritz-Verschuren, Sylvia; Roose, Marit; Venema, Sandra; Germeraad, Evelien; Engelsma, Marc; Heutink, Rene
EPI1988014	PB2	Netherlands	2021-Dec-03	EPI_ISL_7683138	A/red fox/Netherlands/21040099-007/2021	Wageningen Bioveterinary Research	Wageningen Bioveterinary Research	Beerens, Nancy; Harders, Frank; Pritz-Verschuren, Sylvia; Roose, Marit; Venema, Sandra; Germeraad, Evelien; Engelsma, Marc; Heutink, Rene
EPI1988006	PB2	Netherlands	2021-Dec-03	EPI_ISL_7683137	A/red fox/Netherlands/21040099-006/2021	Wageningen Bioveterinary Research	Wageningen Bioveterinary Research	Beerens, Nancy; Harders, Frank; Pritz-Verschuren, Sylvia; Roose, Marit; Venema, Sandra; Germeraad, Evelien; Engelsma, Marc; Heutink, Rene
EPI1943562	PB2	Netherlands	2021-Dec-03	EPI_ISL_7683118	A/red fox/Netherlands/21040099-001/2021	Wageningen Bioveterinary Research	Wageningen Bioveterinary Research	Beerens, Nancy; Harders, Frank; Pritz-Verschuren, Sylvia; Roose, Marit; Venema, Sandra; Germeraad, Evelien; Engelsma, Marc; Heutink, Rene
EPI3177565	PB2	Germany	2023-Jun-12	EPI_ISL_19029378	A/Fox/Bavaria/i193/2023	Bayerisches Landesamt f√ºr Gesundheit und Lebensmittelsicherheit	Bayerisches Landesamt f√ºr Gesundheit und Lebensmittelsicherheit
EPI2730914	PB2	United Kingdom	2023-Jul-26	EPI_ISL_18226744	A/red fox/Northern Ireland/22191/2023	AFBI - Agri-Food & Bioscience Institute	Agri-Food and Biosciences Institute (AFBINI)	Lagan, P.; Lemon, K.
EPI2730906	PB2	United Kingdom	2023-Jul-26	EPI_ISL_18226743	A/red fox/Northern Ireland/22185/2023	AFBI - Agri-Food & Bioscience Institute	Agri-Food and Biosciences Institute (AFBINI)	Lagan, P.; Lemon, K.
EPI2697655	PB2	Finland	2023-Jul-24	EPI_ISL_18123934	A/arctic-fox/Finland/614/2023	Finnish Food Authority	Finnish Institute for Health and Welfare, THL	Tuija Kantala, Alice Fusaro, Tuija Gadd, Monica Gallo, Niina Ikonen, Lauri Kareinen, Ari Kauppinen, Niina Tammiranta, Erika Lindh
EPI2697647	PB2	Finland	2023-Jul-24	EPI_ISL_18123933	A/arctic-fox/Finland/613/2023	Finnish Food Authority	Finnish Institute for Health and Welfare, THL	Tuija Kantala, Alice Fusaro, Tuija Gadd, Monica Gallo, Niina Ikonen, Lauri Kareinen, Ari Kauppinen, Niina Tammiranta, Erika Lindh
EPI2697631	PB2	Finland	2023-Jul-20	EPI_ISL_18123931	A/fox/Finland/602/2023	Finnish Food Authority	Finnish Institute for Health and Welfare, THL	Tuija Kantala, Alice Fusaro, Tuija Gadd, Monica Gallo, Niina Ikonen, Lauri Kareinen, Ari Kauppinen, Niina Tammiranta, Erika Lindh
EPI2697499	PB2	Finland	2023-Jul-17	EPI_ISL_18122445	A/red-fox/Finland/553/2023	Finnish Food Authority	Finnish Institute for Health and Welfare, THL	Tuija Kantala, Alice Fusaro, Tuija Gadd, Monica Gallo, Niina Ikonen, Lauri Kareinen, Ari Kauppinen, Niina Tammiranta, Erika Lindh
EPI2697469	PB2	Finland	2023-Jul-20	EPI_ISL_18122441	A/fox/Finland/601/2023	Finnish Food Authority	Finnish Institute for Health and Welfare, THL	Tuija Kantala, Alice Fusaro, Tuija Gadd, Monica Gallo, Niina Ikonen, Lauri Kareinen, Ari Kauppinen, Niina Tammiranta, Erika Lindh
EPI2697461	PB2	Finland	2023-Jul-24	EPI_ISL_18122440	A/arctic-fox/Finland/622/2023	Finnish Food Authority	Finnish Institute for Health and Welfare, THL	Tuija Kantala, Alice Fusaro, Tuija Gadd, Monica Gallo, Niina Ikonen, Lauri Kareinen, Ari Kauppinen, Niina Tammiranta, Erika Lindh
EPI2697453	PB2	Finland	2023-Jul-24	EPI_ISL_18122439	A/arctic-fox/Finland/621/2023	Finnish Food Authority	Finnish Institute for Health and Welfare, THL	Tuija Kantala, Alice Fusaro, Tuija Gadd, Monica Gallo, Niina Ikonen, Lauri Kareinen, Ari Kauppinen, Niina Tammiranta, Erika Lindh
EPI2697445	PB2	Finland	2023-Jul-24	EPI_ISL_18122438	A/arctic-fox/Finland/620/2023	Finnish Food Authority	Finnish Institute for Health and Welfare, THL	Tuija Kantala, Alice Fusaro, Tuija Gadd, Monica Gallo, Niina Ikonen, Lauri Kareinen, Ari Kauppinen, Niina Tammiranta, Erika Lindh
EPI2697437	PB2	Finland	2023-Jul-24	EPI_ISL_18122437	A/arctic-fox/Finland/619/2023	Finnish Food Authority	Finnish Institute for Health and Welfare, THL	Tuija Kantala, Alice Fusaro, Tuija Gadd, Monica Gallo, Niina Ikonen, Lauri Kareinen, Ari Kauppinen, Niina Tammiranta, Erika Lindh
EPI2697429	PB2	Finland	2023-Jul-24	EPI_ISL_18122436	A/arctic-fox/Finland/618/2023	Finnish Food Authority	Finnish Institute for Health and Welfare, THL	Tuija Kantala, Alice Fusaro, Tuija Gadd, Monica Gallo, Niina Ikonen, Lauri Kareinen, Ari Kauppinen, Niina Tammiranta, Erika Lindh
EPI2697421	PB2	Finland	2023-Jul-24	EPI_ISL_18122435	A/arctic-fox/Finland/616/2023	Finnish Food Authority	Finnish Institute for Health and Welfare, THL	Tuija Kantala, Alice Fusaro, Tuija Gadd, Monica Gallo, Niina Ikonen, Lauri Kareinen, Ari Kauppinen, Niina Tammiranta, Erika Lindh
EPI2697406	PB2	Finland	2023-Jul-18	EPI_ISL_18122433	A/arctic-fox/Finland/577/2023	Finnish Food Authority	Finnish Institute for Health and Welfare, THL	Tuija Kantala, Alice Fusaro, Tuija Gadd, Monica Gallo, Niina Ikonen, Lauri Kareinen, Ari Kauppinen, Niina Tammiranta, Erika Lindh
EPI2697398	PB2	Finland	2023-Jul-18	EPI_ISL_18122432	A/arctic-fox/Finland/576/2023	Finnish Food Authority	Finnish Institute for Health and Welfare, THL	Tuija Kantala, Alice Fusaro, Tuija Gadd, Monica Gallo, Niina Ikonen, Lauri Kareinen, Ari Kauppinen, Niina Tammiranta, Erika Lindh
EPI2697390	PB2	Finland	2023-Jul-18	EPI_ISL_18122431	A/arctic-fox/Finland/575/2023	Finnish Food Authority	Finnish Institute for Health and Welfare, THL	Tuija Kantala, Alice Fusaro, Tuija Gadd, Monica Gallo, Niina Ikonen, Lauri Kareinen, Ari Kauppinen, Niina Tammiranta, Erika Lindh
EPI2697382	PB2	Finland	2023-Jul-18	EPI_ISL_18122430	A/arctic-fox/Finland/574/2023	Finnish Food Authority	Finnish Institute for Health and Welfare, THL	Tuija Kantala, Alice Fusaro, Tuija Gadd, Monica Gallo, Niina Ikonen, Lauri Kareinen, Ari Kauppinen, Niina Tammiranta, Erika Lindh
EPI2697374	PB2	Finland	2023-Jul-17	EPI_ISL_18122429	A/arctic-fox/Finland/567/2023	Finnish Food Authority	Finnish Institute for Health and Welfare, THL	Tuija Kantala, Alice Fusaro, Tuija Gadd, Monica Gallo, Niina Ikonen, Lauri Kareinen, Ari Kauppinen, Niina Tammiranta, Erika Lindh
EPI2697359	PB2	Finland	2023-Jul-17	EPI_ISL_18122427	A/arctic-fox/Finland/565/2023	Finnish Food Authority	Finnish Institute for Health and Welfare, THL	Tuija Kantala, Alice Fusaro, Tuija Gadd, Monica Gallo, Niina Ikonen, Lauri Kareinen, Ari Kauppinen, Niina Tammiranta, Erika Lindh
EPI2697351	PB2	Finland	2023-Jul-14	EPI_ISL_18122426	A/arctic-fox/Finland/549/2023	Finnish Food Authority	Finnish Institute for Health and Welfare, THL	Tuija Kantala, Alice Fusaro, Tuija Gadd, Monica Gallo, Niina Ikonen, Lauri Kareinen, Ari Kauppinen, Niina Tammiranta, Erika Lindh
EPI2697335	PB2	Finland	2023-Jul-14	EPI_ISL_18122424	A/arctic-fox/Finland/544/2023	Finnish Food Authority	Finnish Institute for Health and Welfare, THL	Tuija Kantala, Alice Fusaro, Tuija Gadd, Monica Gallo, Niina Ikonen, Lauri Kareinen, Ari Kauppinen, Niina Tammiranta, Erika Lindh
EPI2697327	PB2	Finland	2023-Jul-14	EPI_ISL_18122423	A/arctic-fox/Finland/543/2023	Finnish Food Authority	Finnish Institute for Health and Welfare, THL	Tuija Kantala, Alice Fusaro, Tuija Gadd, Monica Gallo, Niina Ikonen, Lauri Kareinen, Ari Kauppinen, Niina Tammiranta, Erika Lindh
EPI2697318	PB2	Finland	2023-Jul-14	EPI_ISL_18122422	A/arctic-fox/Finland/542/2023	Finnish Food Authority	Finnish Institute for Health and Welfare, THL	Tuija Kantala, Alice Fusaro, Tuija Gadd, Monica Gallo, Niina Ikonen, Lauri Kareinen, Ari Kauppinen, Niina Tammiranta, Erika Lindh
EPI2697302	PB2	Finland	2023-Jul-10	EPI_ISL_18122420	A/arctic-fox/Finland/504/2023	Finnish Food Authority	Finnish Institute for Health and Welfare, THL	Tuija Kantala, Alice Fusaro, Tuija Gadd, Monica Gallo, Niina Ikonen, Lauri Kareinen, Ari Kauppinen, Niina Tammiranta, Erika Lindh
EPI2697287	PB2	Finland	2023-Jul-10	EPI_ISL_18122418	A/arctic-fox/Finland/495/2023	Finnish Food Authority	Finnish Institute for Health and Welfare, THL	Tuija Kantala, Alice Fusaro, Tuija Gadd, Monica Gallo, Niina Ikonen, Lauri Kareinen, Ari Kauppinen, Niina Tammiranta, Erika Lindh
EPI2608633	PB2	Germany	2023-Mar-29	EPI_ISL_17880914	A/Red fox/Germany/51023-261/2023	Lower Saxony State Office for Consumer Protection and Food Safety	Lower Saxony State Office for Consumer Protection & Food Safety
EPI2608616	PB2	Germany	2023-Feb-09	EPI_ISL_17880911	A/Red fox/Germany/51023-124/2023	Lower Saxony State Office for Consumer Protection and Food Safety	Lower Saxony State Office for Consumer Protection & Food Safety
EPI2608592	PB2	Germany	2023-Jan-31	EPI_ISL_17880908	A/Red fox/Germany/51023-113/2023	Lower Saxony State Office for Consumer Protection and Food Safety	Lower Saxony State Office for Consumer Protection & Food Safety
EPI2608561	PB2	Germany	2023-Jan-09	EPI_ISL_17880904	A/Red fox/Germany/51023-60/2023	Lower Saxony State Office for Consumer Protection and Food Safety	Lower Saxony State Office for Consumer Protection & Food Safety
EPI2467142	PB2	France	2023-Feb-10	EPI_ISL_17233302	A/fox/France/23P002844/2023	Anses (Ploufragan-Plouzan√©)	ANSES Agence Nationale De Securite Sanitaire De L‚Äôalimentation
EPI2297254	PB2	Belgium	2022-Dec-08	EPI_ISL_16549380	A/Vulpes_vulpes/Belgium/14775-0001/2022	Sciensano - Animal Infectious Diseases	Sciensano, Department of Animal Infectious Diseases	Van Borm, Steven; Roupie, Virginie; Hostyn, Pierre; Lambrecht, Benedicte; Steensels, Mieke
EPI3073424	PB2	Germany	2024-Jan-01	EPI_ISL_18937337	A/fox/Germany-BW/2024AI00417/2024	Friedrich-Loeffler-Institut	Friedrich-Loeffler-Institut
EPI2764340	PB2	Belgium	2023-May-17	EPI_ISL_18347730	A/Vulpes_vulpes/Belgium/04757_0004/2023	Sciensano - Animal Infectious Diseases	Sciensano, Department of Animal Infectious Diseases	Van Borm, Steven; Roupie, Virginie; Hostyn, Pierre; Mathijs, Elisabeth; Lambrecht, Benedicte; Steensels, Mieke
EPI2639287	PB2	Japan	2023-Feb-20	EPI_ISL_17857959	A/Ezo red fox/Hokkaido/3/2023	Graduate School of Veterinary Medicine, Hokkaido University	Graduate School of Veterinary Medicine, Hokkaido University	Yoshihiro, Sakoda; Norikazu, Isoda; Takahiro, Hiono; Yik Lim, Hew; Tatsuru, Morita
EPI2585314	PB2	Belgium	2023-Apr-24	EPI_ISL_17774571	A/Vulpes_Vulpes/Belgium/04018_0005/2023	Sciensano - Animal Infectious Diseases	Sciensano, Department of Animal Infectious Diseases	Van Borm, Steven; Roupie, Virginie; Hostyn, Pierre; Mathijs, Elisabeth; Lambrecht, Benedicte; Steensels, Mieke
EPI2585305	PB2	Belgium	2023-Apr-24	EPI_ISL_17774570	A/Vulpes_Vulpes/Belgium/04016_0001/2023	Sciensano - Animal Infectious Diseases	Sciensano, Department of Animal Infectious Diseases	Van Borm, Steven; Roupie, Virginie; Hostyn, Pierre; Mathijs, Elisabeth; Lambrecht, Benedicte; Steensels, Mieke
EPI2585297	PB2	Belgium	2023-Apr-14	EPI_ISL_17774358	A/Vulpes_Vulpes/Belgium/03704_0001/2023	Sciensano - Animal Infectious Diseases	Sciensano, Department of Animal Infectious Diseases	Van Borm, Steven; Roupie, Virginie; Hostyn, Pierre; Mathijs, Elisabeth; Lambrecht, Benedicte; Steensels, Mieke
EPI2585289	PB2	Belgium	2023-Apr-14	EPI_ISL_17774357	A/Vulpes_Vulpes/Belgium/03703_0007/2023	Sciensano - Animal Infectious Diseases	Sciensano, Department of Animal Infectious Diseases	Van Borm, Steven; Roupie, Virginie; Hostyn, Pierre; Mathijs, Elisabeth; Lambrecht, Benedicte; Steensels, Mieke
EPI2585281	PB2	Belgium	2023-Apr-14	EPI_ISL_17774308	A/Vulpes_Vulpes/Belgium/03703_0003/2023	Sciensano - Animal Infectious Diseases	Sciensano, Department of Animal Infectious Diseases	Van Borm, Steven; Roupie, Virginie; Hostyn, Pierre; Mathijs, Elisabeth; Lambrecht, Benedicte; Steensels, Mieke
EPI2585272	PB2	Belgium	2023-Apr-14	EPI_ISL_17774224	A/Vulpes_Vulpes/Belgium/03703_0001/2023	Sciensano - Animal Infectious Diseases	Sciensano, Department of Animal Infectious Diseases	Van Borm, Steven; Roupie, Virginie; Hostyn, Pierre; Mathijs, Elisabeth; Lambrecht, Benedicte; Steensels, Mieke
EPI2584336	PB2	Japan	2023-Apr-12	EPI_ISL_17766057	A/Ezo red fox/Hokkaido/2/2023	Graduate School of Veterinary Medicine, Hokkaido University	Graduate School of Veterinary Medicine, Hokkaido University	Yoshihiro,Sakoda; Norikazu,Isoda; Takahiro,Hiono; Yik Lim,Hew; Tatsuru,Morita
EPI2540294	PB2	Belgium	2023-Feb-10	EPI_ISL_17606263	A/Vulpes_vulpes/Belgium/01295_0002/2023	Sciensano - Animal Infectious Diseases	Sciensano, Department of Animal Infectious Diseases	Van Borm, Steven; Roupie, Virginie; Hostyn, Pierre; Mathijs, Elisabeth; Lambrecht, Benedicte; Steensels, Mieke
EPI2499735	PB2	Canada	2022-Apr-15	EPI_ISL_17393093	A/Red Fox/ON/FAV-0301-05/2022	Ontario Veterinary College, University of Guelph	Canadian Food Inspection Agency	Alkie, T; Ojkic, D; Stevens, B; Xu, W; Hisanaga, T; Koziuk, T; Fisher, M; Lung, O; Berhane, Y
EPI2259576	PB2	Canada	2022-Apr-15	EPI_ISL_16248229	A/Red fox/ON/FAV-0301-05/2022	Ontario Veterinary College, University of Guelph	Canadian Food Inspection Agency	Alkie, Tamiru; Cox, Sherri; Ojkic, Davor; Stevens, Brian; Xu, Wanhong; Hisanaga, Tamiko; Suderman, Suderman; Koziuk, Janice; Kruczkiewicz, Peter; Nguyen, Hoang Hai; Fisher, Mathew; Lung, Oliver; Berhane, Yohannes
EPI2259568	PB2	Canada	2022-May-24	EPI_ISL_16244526	A/Red fox/PEI/FAV-0592-01/2022	Atlantic Veterinary College, University of Prince Edward Island	Canadian Food Inspection Agency	Alkie, Tamiru; Yason, Carmencita; Jones, Megan E. B.; Bourque, Laura; Xu, Wanhong; Hisanaga, Tamiko; Suderman, Suderman; Koziuk, Janice; Kruczkiewicz, Peter; Nguyen, Hoang Hai; Fisher, Mathew; Lung, Oliver; Berhane, Yohannes
EPI2259316	PB2	United States	2022-May-11	EPI_ISL_16243970	A/fox/Iowa/22-015357-002/2022	National Veterinary Services Laboratories - USDA	National Veterinary Services Laboratories - USDA	Chinh,Thanh;Love, Emily;Franzen,Kerrie;Killian,Mary;Koster,Leo;Lantz,Kristina;Stuber,Tod;Hicks,Jessica
EPI2258916	PB2	United States	2022-Apr-22	EPI_ISL_16240637	A/fox/Michigan/22-014536-008/2022	National Veterinary Services Laboratories - USDA	National Veterinary Services Laboratories - USDA	Chinh,Thanh;Love, Emily;Franzen,Kerrie;Killian,Mary;Koster,Leo;Lantz,Kristina;Stuber,Tod;Hicks,Jessica
EPI2258908	PB2	United States	2022-Apr-22	EPI_ISL_16240636	A/fox/Michigan/22-014536-007/2022	National Veterinary Services Laboratories - USDA	National Veterinary Services Laboratories - USDA	Chinh,Thanh;Love, Emily;Franzen,Kerrie;Killian,Mary;Koster,Leo;Lantz,Kristina;Stuber,Tod;Hicks,Jessica
EPI2258900	PB2	United States	2022-Apr-22	EPI_ISL_16240635	A/fox/Michigan/22-014536-002/2022	National Veterinary Services Laboratories - USDA	National Veterinary Services Laboratories - USDA	Chinh,Thanh;Love, Emily;Franzen,Kerrie;Killian,Mary;Koster,Leo;Lantz,Kristina;Stuber,Tod;Hicks,Jessica
EPI2258892	PB2	United States	2022-Apr-22	EPI_ISL_16240634	A/fox/Michigan/22-014536-001/2022	National Veterinary Services Laboratories - USDA	National Veterinary Services Laboratories - USDA	Chinh,Thanh;Love, Emily;Franzen,Kerrie;Killian,Mary;Koster,Leo;Lantz,Kristina;Stuber,Tod;Hicks,Jessica
EPI2236675	PB2	Canada	2022-Jun-10	EPI_ISL_16023371	A/Red Fox/AB/FAV-0835-13/2022	Alberta Agriculture and Forestry, Government of Alberta	Canadian Food Inspection Agency	Alkie, Tamiru; Hicks, Mark; Pybuse, Margo J; Xu, Wanhong; Hisanaga, Tamiko; Suderman, Suderman; Koziuk, Janice; Kruczkiewicz, Peter; Nguyen, Hoang Hai; Fisher, Mathew; Lung, Oliver; Berhane, Yohannes
EPI2236667	PB2	Canada	2022-May-05	EPI_ISL_16023370	A/Red Fox/AB/FAV-0835-02/2022	Alberta Agriculture and Forestry, Government of Alberta	Canadian Food Inspection Agency	Alkie, Tamiru; Hicks, Mark; Pybuse, Margo J; Xu, Wanhong; Hisanaga, Tamiko; Suderman, Suderman; Koziuk, Janice; Kruczkiewicz, Peter; Nguyen, Hoang Hai; Fisher, Mathew; Lung, Oliver; Berhane, Yohannes
EPI2236550	PB2	Canada	2022-May-05	EPI_ISL_16023345	A/Red Fox/AB/FAV-0835-01/2022	Alberta Agriculture and Forestry, Government of Alberta	Canadian Food Inspection Agency	Alkie, Tamiru; Hicks, Mark; Pybuse, Margo; Xu, Wanhong; Hisanaga, Tamiko; Suderman, Suderman; Koziuk, Janice; Kruczkiewicz, Peter; Nguyen, Hoang Hai; Fisher, Mathew; Lung, Oliver; Berhane, Yohannes
EPI2236492	PB2	Canada	2022-May-24	EPI_ISL_16020774	A/Red Fox/PEI/FAV-0591-01/2022	Atlantic Veterinary College, University of Prince Edward Island	Canadian Food Inspection Agency	Alkie, Tamiru; Yason, Carmencita; Jones, E.B. Megan; Bourque, Laura; Xu, Wanhong; Hisanaga, Tamiko; Suderman, Suderman; Koziuk, Janice; Kruczkiewicz, Peter; Nguyen, Hoang Hai; Fisher, Mathew; Lung, Oliver; Berhane, Yohannes
EPI2236484	PB2	Canada	2022-May-19	EPI_ISL_16020773	A/Red Fox/PEI/FAV-0544/2022	Atlantic Veterinary College, University of Prince Edward Island	Canadian Food Inspection Agency	Alkie, Tamiru; Yason, Carmencita; Jones, E.B. Megan; Bourque, Laura; Xu, Wanhong; Hisanaga, Tamiko; Suderman, Suderman; Koziuk, Janice; Kruczkiewicz, Peter; Nguyen, Hoang Hai; Fisher, Mathew; Lung, Oliver; Berhane, Yohannes
EPI2236476	PB2	Canada	2022-May-24	EPI_ISL_16020772	A/Red Fox/PEI/FAV-0592-02/2022	Atlantic Veterinary College, University of Prince Edward Island	Canadian Food Inspection Agency	Alkie, Tamiru; Yason, Carmencita; Jones, E.B. Megan; Bourque, Laura; Xu, Wanhong; Hisanaga, Tamiko; Suderman, Suderman; Koziuk, Janice; Kruczkiewicz, Peter; Nguyen, Hoang Hai; Fisher, Mathew; Lung, Oliver; Berhane, Yohannes
EPI2236765	PB2	Canada	2022-Apr-22	EPI_ISL_16014529	A/Red Fox/ON/FAV-0558-02/2022	Ontario Veterinary College, University of Guelph	Canadian Food Inspection Agency	Alkie, Tamiru; Cox, Sherri; Ojkic, Davor; Stevens, Brian; Xu, Wanhong; Hisanaga, Tamiko; Suderman, Suderman; Koziuk, Janice; Kruczkiewicz, Peter; Nguyen, Hoang Hai; Fisher, Mathew; Lung, Oliver; Berhane, Yohannes
EPI2236289	PB2	Canada	2022-Apr-22	EPI_ISL_16014527	A/Red Fox/ON/FAV-0558-01/2022	Ontario Veterinary College, University of Guelph	Canadian Food Inspection Agency	Alkie, Tamiru; Cox, Sherri; Ojkic, Davor; Stevens, Brian; Xu, Wanhong; Hisanaga, Tamiko; Suderman, Suderman; Koziuk, Janice; Kruczkiewicz, Peter; Nguyen, Hoang Hai; Fisher, Mathew; Lung, Oliver; Berhane, Yohannes
EPI2236253	PB2	Canada	2022-Apr-16	EPI_ISL_16014448	A/Red Fox/ON/FAV-0531/2022	Ontario Veterinary College, University of Guelph	Canadian Food Inspection Agency	Alkie, Tamiru; Cox, Sherri; Ojkic, Davor; Stevens, Brian; Xu, Wanhong; Hisanaga, Tamiko; Suderman, Suderman; Koziuk, Janice; Kruczkiewicz, Peter; Nguyen, Hoang Hai; Fisher, Mathew; Lung, Oliver; Berhane, Yohannes
EPI2236245	PB2	Canada	2022-Apr-13	EPI_ISL_16014445	A/Red Fox/ON/FAV-0300-06/2022	Ontario Veterinary College, University of Guelph	Canadian Food Inspection Agency	Alkie, Tamiru; Cox, Sherri; Ojkic, Davor; Stevens, Brian; Xu, Wanhong; Hisanaga, Tamiko; Suderman, Suderman; Koziuk, Janice; Kruczkiewicz, Peter; Nguyen, Hoang Hai; Fisher, Mathew; Lung, Oliver; Berhane, Yohannes
EPI2236237	PB2	Canada	2022-Apr-22	EPI_ISL_16014368	A/Red Fox/ON/FAV-0300-05/2022	Ontario Veterinary College, University of Guelph	Canadian Food Inspection Agency	Alkie, Tamiru; Cox, Sherri; Ojkic, Davor; Stevens, Brian; Xu, Wanhong; Hisanaga, Tamiko; Suderman, Suderman; Koziuk, Janice; Kruczkiewicz, Peter; Nguyen, Hoang Hai; Fisher, Mathew; Lung, Oliver; Berhane, Yohannes
EPI2131371	PB2	United States	2022-May-04	EPI_ISL_14552975	A/Vulpes vulpes/New_York/099451/2022	Cornell University	Cornell University	Diel, Diego G; Caserta, Leonardo Cardia; Cronk, Brittany D.
EPI2129829	PB2	Belgium	2022-Jun-16	EPI_ISL_14494796	A/Vulpes_vulpes/Belgium/9031_0008/2022	Sciensano - Animal Infectious Diseases	Sciensano, Department of Animal Infectious Diseases	Van Borm, Steven; Mathijs, Elisabeth; Roupie, Virginie; Vervaeke, Muriel; Lambrecht, Benedicte; Steensels, Mieke
EPI2053950	PB2	United States	2022-May-06	EPI_ISL_13052728	A/fox/Wisconsin/22-014746-029/2022	National Veterinary Services Laboratories - USDA	National Veterinary Services Laboratories - USDA	Chinh,Thanh;Franzen,Kerrie;Love, Emily;Killian,Mary;Koster,Leo;Lantz,Kristina;Stuber,Tod;Hicks,Jessica
EPI2053942	PB2	United States	2022-May-06	EPI_ISL_13052727	A/fox/Wisconsin/22-014746-023/2022	National Veterinary Services Laboratories - USDA	National Veterinary Services Laboratories - USDA	Chinh,Thanh;Franzen,Kerrie;Love, Emily;Killian,Mary;Koster,Leo;Lantz,Kristina;Stuber,Tod;Hicks,Jessica
EPI2053934	PB2	United States	2022-May-03	EPI_ISL_13052726	A/fox/Wisconsin/22-014746-016/2022	National Veterinary Services Laboratories - USDA	National Veterinary Services Laboratories - USDA	Chinh,Thanh;Franzen,Kerrie;Love, Emily;Killian,Mary;Koster,Leo;Lantz,Kristina;Stuber,Tod;Hicks,Jessica
EPI2053926	PB2	United States	2022-May-03	EPI_ISL_13052725	A/fox/Wisconsin/22-014746-010/2022	National Veterinary Services Laboratories - USDA	National Veterinary Services Laboratories - USDA	Chinh,Thanh;Franzen,Kerrie;Love, Emily;Killian,Mary;Koster,Leo;Lantz,Kristina;Stuber,Tod;Hicks,Jessica
EPI2053918	PB2	United States	2022-May-09	EPI_ISL_13052724	A/fox/Minnesota/22-014661-001/2022	National Veterinary Services Laboratories - USDA	National Veterinary Services Laboratories - USDA	Chinh,Thanh;Franzen,Kerrie;Love, Emily;Killian,Mary;Koster,Leo;Lantz,Kristina;Stuber,Tod;Hicks,Jessica
EPI2053910	PB2	United States	2022-May-10	EPI_ISL_13052723	A/fox/Minnesota/22-014660-002/2022	National Veterinary Services Laboratories - USDA	National Veterinary Services Laboratories - USDA	Chinh,Thanh;Franzen,Kerrie;Love, Emily;Killian,Mary;Koster,Leo;Lantz,Kristina;Stuber,Tod;Hicks,Jessica
EPI2053902	PB2	United States	2022-May-10	EPI_ISL_13052722	A/fox/Minnesota/22-014660-001/2022	National Veterinary Services Laboratories - USDA	National Veterinary Services Laboratories - USDA	Chinh,Thanh;Franzen,Kerrie;Love, Emily;Killian,Mary;Koster,Leo;Lantz,Kristina;Stuber,Tod;Hicks,Jessica
EPI2053894	PB2	United States	2022-May-06	EPI_ISL_13052721	A/fox/Iowa/22-014421-001/2022	National Veterinary Services Laboratories - USDA	National Veterinary Services Laboratories - USDA	Chinh,Thanh;Franzen,Kerrie;Love, Emily;Killian,Mary;Koster,Leo;Lantz,Kristina;Stuber,Tod;Hicks,Jessica
EPI2053886	PB2	United States	2022-Apr-22	EPI_ISL_13052720	A/fox/Minnesota/22-014182-001/2022	National Veterinary Services Laboratories - USDA	National Veterinary Services Laboratories - USDA	Chinh,Thanh;Franzen,Kerrie;Love, Emily;Killian,Mary;Koster,Leo;Lantz,Kristina;Stuber,Tod;Hicks,Jessica
EPI2053878	PB2	United States	2022-May-01	EPI_ISL_13052719	A/fox/Wisconsin/22-013774-014/2022	National Veterinary Services Laboratories - USDA	National Veterinary Services Laboratories - USDA	Chinh,Thanh;Franzen,Kerrie;Love, Emily;Killian,Mary;Koster,Leo;Lantz,Kristina;Stuber,Tod;Hicks,Jessica
EPI2053870	PB2	United States	2022-May-01	EPI_ISL_13052718	A/fox/Wisconsin/22-013774-009/2022	National Veterinary Services Laboratories - USDA	National Veterinary Services Laboratories - USDA	Chinh,Thanh;Franzen,Kerrie;Love, Emily;Killian,Mary;Koster,Leo;Lantz,Kristina;Stuber,Tod;Hicks,Jessica
EPI2053862	PB2	United States	2022-May-01	EPI_ISL_13052717	A/fox/Wisconsin/22-013774-002/2022	National Veterinary Services Laboratories - USDA	National Veterinary Services Laboratories - USDA	Chinh,Thanh;Franzen,Kerrie;Love, Emily;Killian,Mary;Koster,Leo;Lantz,Kristina;Stuber,Tod;Hicks,Jessica
EPI2021929	PB2	Japan	2022-Mar-31	EPI_ISL_12174842	A/Ezo red fox/Hokkaido/1/2022	Graduate School of Veterinary Medicine, Hokkaido University	Graduate School of Veterinary Medicine, Hokkaido University	Yoshihiro, SAKODA; Takahiro, HIONO; Norikazu, ISODA
EPI1998135	PB2	Ireland	2022-Feb-14	EPI_ISL_11259283	A/fox/Ireland/3866_22VIR2064-1/2022	Central Veterinary Research Laboratory	Istituto Zooprofilattico Sperimentale delle Venezie	Byrne, C.; Garcia, K.; Cuartero, L.G.; Barbierato, G.; Zecchin, B.; Fusaro, A.; Schivo, A.; Salviato, A.; Palumbo, E.; Giussani, E.; Monne, I.; Terregino, C.
