# Supplementary material for: Decoding non-human mammalian adaptive signatures of 2.3.4.4b H5N1 to assess its human adaptive potential
Source: Research Square preprint supplement (doi:10.21203/rs.3.rs-5157982/v1), 2024-10-04
Supplement: Supplementary file 3 [file c9dae24f755161a9c92ce873.xlsx]

## Sheet: Sheet1
We gratefully acknowledge the authors, originating and submitting laboratories of the sequences from GISAID’s EpiFlu™ Database on which this research is based. The list is detailed below.
All submitters of data may be contacted directly via www.gisaid.org
Segment ID	Segment	Country	Collection date	Isolate-ID	Isolate name	Originating Lab	Submitting Lab	Authors
EPI2794533	HA	Sweden	2023-Jun-23	EPI_ISL_18514426	A/peregrine falcon/Sweden/SVA231027SZ0234/FB004372/U-2023	Swedish Veterinary Agency (SVA)	Swedish Veterinary Agency (SVA)	"Saima,Zohari"
EPI2794523	HA	Sweden	2023-Jul-02	EPI_ISL_18514139	A/peregrine falcon /Sweden/SVA231017SZ0445/FB004185/U-2023	Swedish Veterinary Agency (SVA)	Swedish Veterinary Agency (SVA)	"Siamak,Zohari"
EPI2071472	HA	United Kingdom	2021-Dec-01	EPI_ISL_13370505	A/kestrel/England/244611/2021	Animal and Plant Health Agency (APHA)	Animal and Plant Health Agency (APHA)
EPI2071192	HA	United Kingdom	2021-Nov-16	EPI_ISL_13369761	A/Kestrel/Scotland/058512/2021	Animal and Plant Health Agency (APHA)	Animal and Plant Health Agency (APHA)
EPI2437358	HA	United Kingdom	2023-Jan-30	EPI_ISL_17072339	A/canada_goose/England/121823/2023	Animal and Plant Health Agency (APHA)	Animal and Plant Health Agency (APHA)
EPI2244295	HA	Germany	2022-Jul-25	EPI_ISL_16122075	A/domestic goose/Germany-SH/AI04267/2022	Landeslabor Schleswig-Holstein	Friedrich-Loeffler-Institut
EPI2238851	HA	Netherlands	2022-Nov-21	EPI_ISL_16040744	A/Goose/Netherlands/22020788-001/2022	Wageningen Bioveterinary Research	Wageningen Bioveterinary Research	Beerens, Nancy; Harders, Frank; Pritz-Verschuren, Sylvia; Roose, Marit; Venema, Sandra; Germeraad, Evelien; Engelsma, Marc; Heutink, Rene
EPI2233130	HA	United Kingdom	2022-Oct-25	EPI_ISL_15958017	A/Greylag_goose/England/118319/2022	Animal and Plant Health Agency (APHA)	Animal and Plant Health Agency (APHA)	Byrne, A.; Howton, N.; Maskell, D.; Mollett, B.; Peers-Dent, J.
EPI1944485	HA	Italy	2021-Nov-22	EPI_ISL_7733645	A/goose/Italy/IZSLT-21VIR10273/2021	Istituto Zooprofilattico Sperimentale del Lazio e della Toscana "M. Aleandri"	Istituto Zooprofilattico Sperimentale Delle Venezie	Zecchin, B.; Fusaro, A.; Schivo, A.; Salviato, A.; Palumbo, E.; Milani, A.; Giussani, E.; Pastori, A.; Monne, I.; Terregino, C.
EPI2725874	HA	France	2022-Feb-03	EPI_ISL_18219237	A/Anser_anser/France/22P007390/2022	Anses (Ploufragan-Plouzané)	ANSES Agence Nationale De Securite Sanitaire De L’alimentation
EPI2071632	HA	United Kingdom	2021-Dec-08	EPI_ISL_13370556	A/greylag_goose/Northern_Ireland/17795/2021	Animal and Plant Health Agency (APHA)	Animal and Plant Health Agency (APHA)
EPI2071560	HA	United Kingdom	2021-Dec-04	EPI_ISL_13370516	A/Greylag_goose/England/108622/2021	Animal and Plant Health Agency (APHA)	Animal and Plant Health Agency (APHA)
EPI2071384	HA	United Kingdom	2021-Nov-29	EPI_ISL_13369809	A/greylag_goose/England/108485/2021	Animal and Plant Health Agency (APHA)	Animal and Plant Health Agency (APHA)
EPI2071312	HA	United Kingdom	2021-Nov-24	EPI_ISL_13369776	A/greylag_goose/Northern_Ireland/17077/2021	Animal and Plant Health Agency (APHA)	Animal and Plant Health Agency (APHA)
EPI2071184	HA	United Kingdom	2021-Nov-16	EPI_ISL_13369760	A/pink_footed_goose/Scotland/058488/2021	Animal and Plant Health Agency (APHA)	Animal and Plant Health Agency (APHA)
EPI2071144	HA	United Kingdom	2021-Nov-13	EPI_ISL_13369755	A/Pink-footed_goose/England/243989/2021	Animal and Plant Health Agency (APHA)	Animal and Plant Health Agency (APHA)
EPI2246889	HA	Canada	2022-Apr-02	EPI_ISL_16172175	A/Snow Goose/SK/FAV-0216-02/2022	Western Veterinary College	Canadian Food Inspection Agency	Alkie, Tamiru; Bravo Araya, Maria; Pybus, Margo J; Xu, Wanhong; Hisanaga, Tamiko; Suderman, Suderman; Koziuk, Janice; Kruczkiewicz, Peter; Nguyen, Hoang Hai; Fisher, Mathew; Lung, Oliver; Berhane, Yohannes
EPI2820733	HA	Italy	2023-Nov-16	EPI_ISL_18612234	A/guinea_fowl/Italy/23VIR10341-6/2023	Istituto Zooprofilattico Sperimentale delle Venezie, EU/OIE/Reference Laboratory and FAO Reference Centre for AI and ND	Istituto Zooprofilattico Sperimentale Delle Venezie	Salomoni, A.; Zecchin, B.; Fusaro, A.; Schivo, A.; Salviato, A.; Palumbo, E.; Giussani, E.; Pastori, A.; Savegnago, E.; Monne, I.; Terregino, C.
EPI2246384	HA	United States	2022-Apr-28	EPI_ISL_16171468	A/guinea fowl/Wisconsin/22-013061-003/2022	National Veterinary Services Laboratories - USDA	National Veterinary Services Laboratories - USDA	Chinh,Thanh;Love, Emily;Franzen,Kerrie;Killian,Mary;Koster,Leo;Lantz,Kristina;Stuber,Tod;Hicks,Jessica
EPI2559791	HA	Italy	2023-Feb-18	EPI_ISL_17679759	A/black-headed_gull/Italy/23VIR1484-4/2023	Istituto Zooprofilattico Sperimentale delle Venezie, EU/OIE/Reference Laboratory and FAO Reference Centre for AI and ND	Istituto Zooprofilattico Sperimentale Delle Venezie	Pastori, A.; Zecchin, B.; Fusaro, A.; Schivo, A.; Salviato, A.; Palumbo, E.; Giussani, E.; Monne, I.; Terregino, C.
EPI2559783	HA	Italy	2023-Feb-16	EPI_ISL_17679758	A/black-headed_gull/Italy/23VIR1483-4/2023	Istituto Zooprofilattico Sperimentale delle Venezie, EU/OIE/Reference Laboratory and FAO Reference Centre for AI and ND	Istituto Zooprofilattico Sperimentale Delle Venezie	Pastori, A.; Zecchin, B.; Fusaro, A.; Schivo, A.; Salviato, A.; Palumbo, E.; Giussani, E.; Monne, I.; Terregino, C.
EPI2559775	HA	Italy	2023-Feb-18	EPI_ISL_17679757	A/black-headed_gull/Italy/23VIR1481-4/2023	Istituto Zooprofilattico Sperimentale delle Venezie, EU/OIE/Reference Laboratory and FAO Reference Centre for AI and ND	Istituto Zooprofilattico Sperimentale Delle Venezie	Pastori, A.; Zecchin, B.; Fusaro, A.; Schivo, A.; Salviato, A.; Palumbo, E.; Giussani, E.; Monne, I.; Terregino, C.
EPI2559767	HA	Italy	2023-Feb-18	EPI_ISL_17679756	A/black-headed_gull/Italy/23VIR1478-4/2023	Istituto Zooprofilattico Sperimentale delle Venezie, EU/OIE/Reference Laboratory and FAO Reference Centre for AI and ND	Istituto Zooprofilattico Sperimentale Delle Venezie	Pastori, A.; Zecchin, B.; Fusaro, A.; Schivo, A.; Salviato, A.; Palumbo, E.; Giussani, E.; Monne, I.; Terregino, C.
EPI2559759	HA	Italy	2023-Feb-21	EPI_ISL_17679755	A/black-headed_gull/Italy/23VIR1476-3/2023	Istituto Zooprofilattico Sperimentale delle Venezie, EU/OIE/Reference Laboratory and FAO Reference Centre for AI and ND	Istituto Zooprofilattico Sperimentale Delle Venezie	Pastori, A.; Zecchin, B.; Fusaro, A.; Schivo, A.; Salviato, A.; Palumbo, E.; Giussani, E.; Monne, I.; Terregino, C.
EPI2559751	HA	Italy	2023-Feb-17	EPI_ISL_17679754	A/black-headed_gull/Italy/23VIR1430-8/2023	Istituto Zooprofilattico Sperimentale delle Venezie, EU/OIE/Reference Laboratory and FAO Reference Centre for AI and ND	Istituto Zooprofilattico Sperimentale Delle Venezie	Pastori, A.; Zecchin, B.; Fusaro, A.; Schivo, A.; Salviato, A.; Palumbo, E.; Giussani, E.; Monne, I.; Terregino, C.
EPI2559743	HA	Italy	2023-Feb-21	EPI_ISL_17679753	A/black-headed_gull/Italy/23VIR1429-16/2023	Istituto Zooprofilattico Sperimentale delle Venezie, EU/OIE/Reference Laboratory and FAO Reference Centre for AI and ND	Istituto Zooprofilattico Sperimentale Delle Venezie	Pastori, A.; Zecchin, B.; Fusaro, A.; Schivo, A.; Salviato, A.; Palumbo, E.; Giussani, E.; Monne, I.; Terregino, C.
EPI2559735	HA	Italy	2023-Feb-28	EPI_ISL_17679752	A/black-headead_gull/Italy/23VIR1667-1/2023	Istituto Zooprofilattico Sperimentale delle Venezie, EU/OIE/Reference Laboratory and FAO Reference Centre for AI and ND	Istituto Zooprofilattico Sperimentale Delle Venezie	Pastori, A.; Zecchin, B.; Fusaro, A.; Schivo, A.; Salviato, A.; Palumbo, E.; Giussani, E.; Monne, I.; Terregino, C.
EPI2559711	HA	Italy	2023-Feb-27	EPI_ISL_17679749	A/black-headead_gull/Italy/23VIR1633-3/2023	Istituto Zooprofilattico Sperimentale delle Venezie, EU/OIE/Reference Laboratory and FAO Reference Centre for AI and ND	Istituto Zooprofilattico Sperimentale Delle Venezie	Pastori, A.; Zecchin, B.; Fusaro, A.; Schivo, A.; Salviato, A.; Palumbo, E.; Giussani, E.; Monne, I.; Terregino, C.
EPI2559655	HA	Italy	2023-Mar-12	EPI_ISL_17679742	A/little_gull/Italy/23VIR2222-2/2023	Istituto Zooprofilattico Sperimentale delle Venezie, EU/OIE/Reference Laboratory and FAO Reference Centre for AI and ND	Istituto Zooprofilattico Sperimentale Delle Venezie	Pastori, A.; Zecchin, B.; Fusaro, A.; Schivo, A.; Salviato, A.; Palumbo, E.; Giussani, E.; Monne, I.; Terregino, C.
EPI2559647	HA	Italy	2023-Mar-09	EPI_ISL_17679741	A/black-headed_gull/Italy/23VIR2153-1/2023	Istituto Zooprofilattico Sperimentale delle Venezie, EU/OIE/Reference Laboratory and FAO Reference Centre for AI and ND	Istituto Zooprofilattico Sperimentale Delle Venezie	Pastori, A.; Zecchin, B.; Fusaro, A.; Schivo, A.; Salviato, A.; Palumbo, E.; Giussani, E.; Monne, I.; Terregino, C.
EPI2559639	HA	Italy	2023-Mar-09	EPI_ISL_17679740	A/black-headed_gull/Italy/23VIR2152-1/2023	Istituto Zooprofilattico Sperimentale delle Venezie, EU/OIE/Reference Laboratory and FAO Reference Centre for AI and ND	Istituto Zooprofilattico Sperimentale Delle Venezie	Pastori, A.; Zecchin, B.; Fusaro, A.; Schivo, A.; Salviato, A.; Palumbo, E.; Giussani, E.; Monne, I.; Terregino, C.
EPI2559623	HA	Italy	2023-Mar-07	EPI_ISL_17679738	A/black-headed_gull/Italy/23VIR2039-6/2023	Istituto Zooprofilattico Sperimentale delle Venezie, EU/OIE/Reference Laboratory and FAO Reference Centre for AI and ND	Istituto Zooprofilattico Sperimentale Delle Venezie	Pastori, A.; Zecchin, B.; Fusaro, A.; Schivo, A.; Salviato, A.; Palumbo, E.; Giussani, E.; Monne, I.; Terregino, C.
EPI2559607	HA	Italy	2023-Mar-20	EPI_ISL_17679736	A/black-headed_gull/Italy/23VIR2556-2/2023	Istituto Zooprofilattico Sperimentale delle Venezie, EU/OIE/Reference Laboratory and FAO Reference Centre for AI and ND	Istituto Zooprofilattico Sperimentale Delle Venezie	Pastori, A.; Zecchin, B.; Fusaro, A.; Schivo, A.; Salviato, A.; Palumbo, E.; Giussani, E.; Monne, I.; Terregino, C.
EPI2559575	HA	Italy	2023-Mar-08	EPI_ISL_17679732	A/black-headed_gull/Italy/23VIR3132-4/2023	Istituto Zooprofilattico Sperimentale delle Venezie, EU/OIE/Reference Laboratory and FAO Reference Centre for AI and ND	Istituto Zooprofilattico Sperimentale Delle Venezie	Pastori, A.; Zecchin, B.; Fusaro, A.; Schivo, A.; Salviato, A.; Palumbo, E.; Giussani, E.; Monne, I.; Terregino, C.
EPI2559567	HA	Italy	2023-Mar-07	EPI_ISL_17679731	A/black-headed_gull/Italy/23VIR2787-2/2023	Istituto Zooprofilattico Sperimentale delle Venezie, EU/OIE/Reference Laboratory and FAO Reference Centre for AI and ND	Istituto Zooprofilattico Sperimentale Delle Venezie	Pastori, A.; Zecchin, B.; Fusaro, A.; Schivo, A.; Salviato, A.; Palumbo, E.; Giussani, E.; Monne, I.; Terregino, C.
EPI2586341	HA	Peru	2023-Mar-16	EPI_ISL_17777527	A/gull/Peru/LIM-INS-006/2023	Laboratorio de Virus Respiratorios, Centro Nacional de Salud Publica	Instituto Nacional de Salud Peru	Padilla-Rojas, C.; Sevilla-Casta?eda, L.; Hurtado-Vela, C.; Silva-Molina, J.; Huarca-Balbin, L.; Lizarraga-Olivares, W.; Jimenez-Vasquez, V.; Lope-Pari, P.; Alarcon, Y.; Cuquian, K.; Jara-Vila, J.; Ceron-Villanueva, J.; Conza-Blanco, L.; Rojas-Serrano, N.; Arotinco-Garaygar, G.
EPI2759312	HA	Russian Federation	2023-Aug-28	EPI_ISL_18317774	A/european herring gull/Leningrad_region/RII-WD493S/2023	WHO National Influenza Centre Russian Federation	WHO National Influenza Centre Russian Federation	Andrey, Komissarov; Artem, Fadeev; Nikita, Yolshin; Anna, Ivanova; Maria, Pisareva; Alena, Zheltukhina; Daria, Danilenko; Dmitry, Lioznov
EPI2759298	HA	Russian Federation	2023-Aug-28	EPI_ISL_18317773	A/european herring gull/Leningrad_region/RII-WD485S/2023	WHO National Influenza Centre Russian Federation	WHO National Influenza Centre Russian Federation	Andrey, Komissarov; Artem, Fadeev; Nikita, Yolshin; Anna, Ivanova; Maria, Pisareva; Alena, Zheltukhina; Daria, Danilenko; Dmitry, Lioznov
EPI2759288	HA	Russian Federation	2023-Aug-25	EPI_ISL_18317757	A/european herring gull/Leningrad_region/RII-WD478S/2023	WHO National Influenza Centre Russian Federation	WHO National Influenza Centre Russian Federation	Andrey, Komissarov; Artem, Fadeev; Nikita, Yolshin; Anna, Ivanova; Maria, Pisareva; Alena, Zheltukhina; Daria, Danilenko; Dmitry, Lioznov
EPI2759280	HA	Russian Federation	2023-Aug-02	EPI_ISL_18317317	A/european herring gull/Leningrad_region/RII-WD312/2023	WHO National Influenza Centre Russian Federation	WHO National Influenza Centre Russian Federation	Andrey, Komissarov; Artem, Fadeev; Nikita, Yolshin; Anna, Ivanova; Maria, Pisareva; Alena, Zheltukhina; Daria, Danilenko; Dmitry, Lioznov
EPI2351619	HA	Belgium	2022-Sep-07	EPI_ISL_16810105	A/Larus_argentatus/Belgium/10811_0002/2022	Sciensano - Animal Infectious Diseases	Sciensano, Department of Animal Infectious Diseases	Van Borm, Steven; Roupie, Virginie; Hostyn, Pierre; Lambrecht, Benedicte; Steensels, Mieke
EPI2071040	HA	United Kingdom	2021-Nov-02	EPI_ISL_13369400	A/Herring_gull/Wales/054692/2021	Animal and Plant Health Agency (APHA)	Animal and Plant Health Agency (APHA)
EPI2244359	HA	Germany	2022-Jul-20	EPI_ISL_16122153	A/lesser black-backed gull/Germany-SH/AI04277/2022	Landeslabor Schleswig-Holstein	Friedrich-Loeffler-Institut
EPI2150854	HA	Sweden	2022-Jun-13	EPI_ISL_14811850	A/Mediterranean gull/Sweden/SVA220617SZ0306/FB001940/2022	Swedish Veterinary Agency (SVA)	Swedish Veterinary Agency (SVA)
EPI2150846	HA	Sweden	2022-Jun-13	EPI_ISL_14811846	A/Mediterranean gull/Sweden/SVA220617SZ0306/FB001939/K-2022	Swedish Veterinary Agency (SVA)	Swedish Veterinary Agency (SVA)
EPI2150918	HA	Sweden	2022-Jun-04	EPI_ISL_14812299	A/black-headed gull/Sweden/SVA220616SZ0350/FB001880/M-2022	Swedish Veterinary Agency (SVA)	Swedish Veterinary Agency (SVA)
EPI2150675	HA	Sweden	2022-Jun-16	EPI_ISL_14811827	A/black-headed gull/Sweden/SVA220617SZ0305/FB001920/K-2022	Swedish Veterinary Agency (SVA)	Swedish Veterinary Agency (SVA)
EPI2150667	HA	Sweden	2022-Jun-04	EPI_ISL_14811826	A/black-headed gull/Sweden/SVA220616SZ0350/FB001882/M-2022	Swedish Veterinary Agency (SVA)	Swedish Veterinary Agency (SVA)
EPI2246400	HA	United States	2022-Apr-28	EPI_ISL_16171470	A/Lady Amherst's pheasant/Wisconsin/22-013061-005/2022	National Veterinary Services Laboratories - USDA	National Veterinary Services Laboratories - USDA	Chinh,Thanh;Love, Emily;Franzen,Kerrie;Killian,Mary;Koster,Leo;Lantz,Kristina;Stuber,Tod;Hicks,Jessica
EPI2071304	HA	United Kingdom	2021-Nov-23	EPI_ISL_13369775	A/peafowl/England/061723/2021	Animal and Plant Health Agency (APHA)	Animal and Plant Health Agency (APHA)
EPI1918765	HA	Sweden	2021-Sep-22	EPI_ISL_4653177	A/common pheasant /Sweden/SVA210923SZ0341/KN000366/M-2021	Swedish Veterinary Agency (SVA)	Swedish Veterinary Agency (SVA)
EPI2820725	HA	Slovenia	2023-Sep-11	EPI_ISL_18612233	A/mute_swan/Slovenia/PER1486-23TA_23VIR10323-22/2023	University of Ljubljana	Istituto Zooprofilattico Sperimentale Delle Venezie	Salomoni, A.; Slavec, B.; Cociancich, V.; Zecchin, B.; Fusaro, A.; Schivo, A.; Salviato, A.; Palumbo, E.; Giussani, E.; Pastori, A.; Savegnago, E.; Monne, I.; Terregino, C.
EPI2071064	HA	United Kingdom	2021-Nov-05	EPI_ISL_13369741	A/whooper_swan/England/055405/2021	Animal and Plant Health Agency (APHA)	Animal and Plant Health Agency (APHA)
EPI2071880	HA	United Kingdom	2021-Dec-23	EPI_ISL_13370619	A/mute_swan/England/387121/2021	Animal and Plant Health Agency (APHA)	Animal and Plant Health Agency (APHA)
EPI2071816	HA	United Kingdom	2021-Dec-15	EPI_ISL_13370611	A/mute_swan/Scotland/073112/2021	Animal and Plant Health Agency (APHA)	Animal and Plant Health Agency (APHA)
EPI2071600	HA	United Kingdom	2021-Dec-06	EPI_ISL_13370521	A/mute_swan/Northern_Ireland/17634/2021	Animal and Plant Health Agency (APHA)	Animal and Plant Health Agency (APHA)
EPI2071592	HA	United Kingdom	2021-Dec-06	EPI_ISL_13370520	A/mute_swan/England/244574/2021	Animal and Plant Health Agency (APHA)	Animal and Plant Health Agency (APHA)
EPI2071528	HA	United Kingdom	2021-Dec-03	EPI_ISL_13370512	A/mute_swan/Northern_Ireland/17533/2021	Animal and Plant Health Agency (APHA)	Animal and Plant Health Agency (APHA)
EPI2071504	HA	United Kingdom	2021-Dec-02	EPI_ISL_13370509	A/mute_swan/Northern_Ireland/17404/2021	Animal and Plant Health Agency (APHA)	Animal and Plant Health Agency (APHA)
EPI2071496	HA	United Kingdom	2021-Dec-02	EPI_ISL_13370508	A/mute_swan/England/244635/2021	Animal and Plant Health Agency (APHA)	Animal and Plant Health Agency (APHA)
EPI2071480	HA	United Kingdom	2021-Dec-01	EPI_ISL_13370506	A/Mute_Swan/England/294146/2021	Animal and Plant Health Agency (APHA)	Animal and Plant Health Agency (APHA)
EPI2071328	HA	United Kingdom	2021-Nov-25	EPI_ISL_13369778	A/mute_swan/Northern_Ireland/17176/2021	Animal and Plant Health Agency (APHA)	Animal and Plant Health Agency (APHA)
EPI2071168	HA	United Kingdom	2021-Nov-15	EPI_ISL_13369758	A/mute_swan/England/292632/2021	Animal and Plant Health Agency (APHA)	Animal and Plant Health Agency (APHA)
EPI2071152	HA	United Kingdom	2021-Nov-14	EPI_ISL_13369756	A/mute_swan/England/244029/2021	Animal and Plant Health Agency (APHA)	Animal and Plant Health Agency (APHA)
EPI2071136	HA	United Kingdom	2021-Nov-13	EPI_ISL_13369754	A/mute_swan/England/243983/2021	Animal and Plant Health Agency (APHA)	Animal and Plant Health Agency (APHA)
EPI2071120	HA	United Kingdom	2021-Nov-12	EPI_ISL_13369748	A/mute_swan/England/108094/2021	Animal and Plant Health Agency (APHA)	Animal and Plant Health Agency (APHA)
EPI2071056	HA	United Kingdom	2021-Nov-03	EPI_ISL_13369740	A/Mute_swan/England/385335/2021	Animal and Plant Health Agency (APHA)	Animal and Plant Health Agency (APHA)
EPI2071048	HA	United Kingdom	2021-Nov-03	EPI_ISL_13369401	A/mute_swan/England/243602/2021	Animal and Plant Health Agency (APHA)	Animal and Plant Health Agency (APHA)
EPI1994418	HA	Sweden	2022-Jan-01	EPI_ISL_10911953	A/Mute Swan/Sweden/SVA220103SZ0264/FB000004/AB-2022	Swedish Veterinary Agency (SVA)	Swedish Veterinary Agency (SVA)
EPI1947428	HA	Netherlands	2021-Nov-19	EPI_ISL_7996369	A/mute swan/Netherlands/21039291-002/2021	Wageningen Bioveterinary Research	Wageningen Bioveterinary Research	Beerens, Nancy; Harders, Frank; Pritz-Verschuren, Sylvia; Roose, Marit; Venema, Sandra; Germeraad, Evelien; Engelsma, Marc; Heutink, Rene
EPI1947420	HA	Netherlands	2021-Nov-07	EPI_ISL_7996368	A/mute swan/Netherlands/21038568-005/2021	Wageningen Bioveterinary Research	Wageningen Bioveterinary Research	Beerens, Nancy; Harders, Frank; Pritz-Verschuren, Sylvia; Roose, Marit; Venema, Sandra; Germeraad, Evelien; Engelsma, Marc; Heutink, Rene
EPI2913205	HA	Chile	2023-Mar-29	EPI_ISL_18760063	A/turkey/Valparaiso/SJCEIRR-2455621/2023	Center of Excellence for Influenza Research and Surveillance	Center of Excellence for Influenza Research and Surveillance	Pardo-Roa,C., Johow,M., Ariyama,N., Almonacid,L.I., Aguayo,C., Castillo,P.N., Munoz,G., Avila,C., Neira,V.; Medina,R.
EPI2559703	HA	Italy	2023-Mar-06	EPI_ISL_17679748	A/turkey/Italy/23VIR1887-10/2023	Istituto Zooprofilattico Sperimentale delle Venezie, EU/OIE/Reference Laboratory and FAO Reference Centre for AI and ND	Istituto Zooprofilattico Sperimentale Delle Venezie	Pastori, A.; Zecchin, B.; Fusaro, A.; Schivo, A.; Salviato, A.; Palumbo, E.; Giussani, E.; Monne, I.; Terregino, C.
EPI2559583	HA	Italy	2023-Apr-10	EPI_ISL_17679733	A/turkey/Italy/23VIR3366-1/2023	Istituto Zooprofilattico Sperimentale delle Venezie, EU/OIE/Reference Laboratory and FAO Reference Centre for AI and ND	Istituto Zooprofilattico Sperimentale Delle Venezie	Pastori, A.; Zecchin, B.; Fusaro, A.; Schivo, A.; Salviato, A.; Palumbo, E.; Giussani, E.; Monne, I.; Terregino, C.
EPI2559559	HA	Italy	2023-Apr-14	EPI_ISL_17679730	A/turkey/Italy/23VIR3520-1/2023	Istituto Zooprofilattico Sperimentale delle Venezie, EU/OIE/Reference Laboratory and FAO Reference Centre for AI and ND	Istituto Zooprofilattico Sperimentale Delle Venezie	Pastori, A.; Zecchin, B.; Fusaro, A.; Schivo, A.; Salviato, A.; Palumbo, E.; Giussani, E.; Monne, I.; Terregino, C.
EPI2559551	HA	Italy	2023-Apr-24	EPI_ISL_17679729	A/turkey/Italy/23VIR3800-6/2023	Istituto Zooprofilattico Sperimentale delle Venezie, EU/OIE/Reference Laboratory and FAO Reference Centre for AI and ND	Istituto Zooprofilattico Sperimentale Delle Venezie	Pastori, A.; Zecchin, B.; Fusaro, A.; Schivo, A.; Salviato, A.; Palumbo, E.; Giussani, E.; Monne, I.; Terregino, C.
EPI2246859	HA	Canada	2022-May-14	EPI_ISL_16171528	A/Turkey/SK/FAV-0266/2022	Western Veterinary College	Canadian Food Inspection Agency	Alkie, Tamiru; Bravo Araya, Maria; Xu, Wanhong; Hisanaga, Tamiko; Suderman, Suderman; Koziuk, Janice; Kruczkiewicz, Peter; Nguyen, Hoang Hai; Fisher, Mathew; Lung, Oliver; Berhane, Yohannes
EPI1944501	HA	Italy	2021-Oct-25	EPI_ISL_7733648	A/turkey/Italy/21VIR8817-1/2021	Istituto Zooprofilattico Sperimentale del Lazio e della Toscana "M. Aleandri"	Istituto Zooprofilattico Sperimentale Delle Venezie	Zecchin, B.; Fusaro, A.; Schivo, A.; Salviato, A.; Palumbo, E.; Milani, A.; Giussani, E.; Pastori, A.; Monne, I.; Terregino, C.
EPI1944493	HA	Italy	2021-Nov-05	EPI_ISL_7733647	A/turkey/Italy/21VIR9210-1/2021	Istituto Zooprofilattico Sperimentale del Lazio e della Toscana "M. Aleandri"	Istituto Zooprofilattico Sperimentale Delle Venezie	Zecchin, B.; Fusaro, A.; Schivo, A.; Salviato, A.; Palumbo, E.; Milani, A.; Giussani, E.; Pastori, A.; Monne, I.; Terregino, C.
EPI1944469	HA	Italy	2021-Nov-15	EPI_ISL_7733643	A/turkey/Italy/21VIR9649-2/2021	Istituto Zooprofilattico Sperimentale delle Venezie, EU/OIE/Reference Laboratory and FAO Reference Centre for AI and ND	Istituto Zooprofilattico Sperimentale Delle Venezie	Zecchin, B.; Fusaro, A.; Schivo, A.; Salviato, A.; Palumbo, E.; Milani, A.; Giussani, E.; Pastori, A.; Monne, I.; Terregino, C.
EPI1944445	HA	Italy	2021-Nov-17	EPI_ISL_7733638	A/turkey/Italy/21VIR9768-8/2021	Istituto Zooprofilattico Sperimentale delle Venezie, EU/OIE/Reference Laboratory and FAO Reference Centre for AI and ND	Istituto Zooprofilattico Sperimentale Delle Venezie	Zecchin, B.; Fusaro, A.; Schivo, A.; Salviato, A.; Palumbo, E.; Milani, A.; Giussani, E.; Pastori, A.; Monne, I.; Terregino, C.
EPI1944437	HA	Italy	2021-Nov-11	EPI_ISL_7733635	A/turkey/Italy/21VIR9510-1/2021	Istituto Zooprofilattico Sperimentale delle Venezie, EU/OIE/Reference Laboratory and FAO Reference Centre for AI and ND	Istituto Zooprofilattico Sperimentale Delle Venezie	Zecchin, B.; Fusaro, A.; Schivo, A.; Salviato, A.; Palumbo, E.; Milani, A.; Giussani, E.; Pastori, A.; Monne, I.; Terregino, C.
EPI1944421	HA	Italy	2021-Nov-03	EPI_ISL_7733633	A/turkey/Italy/21VIR9143-2/2021	Istituto Zooprofilattico Sperimentale delle Venezie, EU/OIE/Reference Laboratory and FAO Reference Centre for AI and ND	Istituto Zooprofilattico Sperimentale Delle Venezie	Zecchin, B.; Fusaro, A.; Schivo, A.; Salviato, A.; Palumbo, E.; Milani, A.; Giussani, E.; Pastori, A.; Monne, I.; Terregino, C.
EPI1944413	HA	Italy	2021-Nov-11	EPI_ISL_7733632	A/turkey/Italy/21VIR9512-1/2021	Istituto Zooprofilattico Sperimentale delle Venezie, EU/OIE/Reference Laboratory and FAO Reference Centre for AI and ND	Istituto Zooprofilattico Sperimentale Delle Venezie	Zecchin, B.; Fusaro, A.; Schivo, A.; Salviato, A.; Palumbo, E.; Milani, A.; Giussani, E.; Pastori, A.; Monne, I.; Terregino, C.
EPI1944397	HA	Italy	2021-Nov-15	EPI_ISL_7733629	A/turkey/Italy/21VIR9652-2/2021	Istituto Zooprofilattico Sperimentale delle Venezie, EU/OIE/Reference Laboratory and FAO Reference Centre for AI and ND	Istituto Zooprofilattico Sperimentale Delle Venezie	Zecchin, B.; Fusaro, A.; Schivo, A.; Salviato, A.; Palumbo, E.; Milani, A.; Giussani, E.; Pastori, A.; Monne, I.; Terregino, C.
EPI1944381	HA	Italy	2021-Nov-17	EPI_ISL_7733624	A/turkey/Italy/21VIR9767-3/2021	Istituto Zooprofilattico Sperimentale delle Venezie, EU/OIE/Reference Laboratory and FAO Reference Centre for AI and ND	Istituto Zooprofilattico Sperimentale Delle Venezie	Zecchin, B.; Fusaro, A.; Schivo, A.; Salviato, A.; Palumbo, E.; Milani, A.; Giussani, E.; Pastori, A.; Monne, I.; Terregino, C.
EPI1944296	HA	Italy	2021-Nov-19	EPI_ISL_7733598	A/turkey/Italy/21VIR9816-1/2021	Istituto Zooprofilattico Speriment. Lombardia, Emilia Ro. IZSLER	Istituto Zooprofilattico Sperimentale Delle Venezie	Zecchin, B.; Fusaro, A.; Schivo, A.; Salviato, A.; Palumbo, E.; Milani, A.; Giussani, E.; Pastori, A.; Monne, I.; Terregino, C.
EPI1944288	HA	Italy	2021-Nov-29	EPI_ISL_7733597	A/turkey/Italy/21VIR10340/2021	Istituto Zooprofilattico Speriment. Lombardia, Emilia Ro. IZSLER	Istituto Zooprofilattico Sperimentale Delle Venezie	Zecchin, B.; Fusaro, A.; Schivo, A.; Salviato, A.; Palumbo, E.; Milani, A.; Giussani, E.; Pastori, A.; Monne, I.; Terregino, C.
EPI1944264	HA	Italy	2021-Nov-18	EPI_ISL_7733587	A/turkey/Italy/21VIR9618-7/2021	Istituto Zooprofilattico Speriment. Lombardia, Emilia Ro. IZSLER	Istituto Zooprofilattico Sperimentale Delle Venezie	Zecchin, B.; Fusaro, A.; Schivo, A.; Salviato, A.; Palumbo, E.; Milani, A.; Giussani, E.; Pastori, A.; Monne, I.; Terregino, C.
EPI1943857	HA	Germany	2021-May-05	EPI_ISL_5145223	A/turkey/Germany-NI/AI04455/2021	Lebensmittel- und Veterinärinstitut Oldenburg - Standort Veterinärinstitut	Friedrich-Loeffler-Institut
EPI2913229	HA	Chile	2023-Mar-17	EPI_ISL_18760067	A/peruvian booby/OHiggins/SJCEIRR-2427551/2023	Center of Excellence for Influenza Research and Surveillance	Center of Excellence for Influenza Research and Surveillance	Pardo-Roa,C., Johow,M., Ariyama,N., Almonacid,L.I., Aguayo,C., Castillo,P.N., Munoz,G., Avila,C., Neira,V.; Medina,R.
EPI2913191	HA	Chile	2023-Feb-13	EPI_ISL_18760061	A/pelican/Biobio/SJCEIRR-236574/2023	Center of Excellence for Influenza Research and Surveillance	Center of Excellence for Influenza Research and Surveillance	Pardo-Roa,C., Johow,M., Ariyama,N., Almonacid,L.I., Aguayo,C., Castillo,P.N., Munoz,G., Avila,C., Neira,V.; Medina,R.
EPI2820847	HA	Italy	2023-Nov-09	EPI_ISL_18612269	A/mallard/Italy/23VIR10283/2023	Istituto Zooprofilattico Sperimentale delle Venezie, EU/OIE/Reference Laboratory and FAO Reference Centre for AI and ND	Istituto Zooprofilattico Sperimentale Delle Venezie	Salomoni, A.; Zecchin, B.; Fusaro, A.; Schivo, A.; Salviato, A.; Palumbo, E.; Giussani, E.; Pastori, A.; Savegnago, E.; Monne, I.; Terregino, C.
EPI2820717	HA	Slovenia	2023-Jul-20	EPI_ISL_18612232	A/common_tern/Slovenia/PER1276-23MA_23VIR10323-21/2023	University of Ljubljana	Istituto Zooprofilattico Sperimentale Delle Venezie	Salomoni, A.; Slavec, B.; Cociancich, V.; Zecchin, B.; Fusaro, A.; Schivo, A.; Salviato, A.; Palumbo, E.; Giussani, E.; Pastori, A.; Savegnago, E.; Monne, I.; Terregino, C.
EPI2820709	HA	Slovenia	2023-Sep-14	EPI_ISL_18612231	A/white_stork/Slovenia/PER1522-23TA_23VIR10323-20/2023	University of Ljubljana	Istituto Zooprofilattico Sperimentale Delle Venezie	Salomoni, A.; Slavec, B.; Cociancich, V.; Zecchin, B.; Fusaro, A.; Schivo, A.; Salviato, A.; Palumbo, E.; Giussani, E.; Pastori, A.; Savegnago, E.; Monne, I.; Terregino, C.
EPI2820701	HA	Slovenia	2023-Mar-03	EPI_ISL_18612230	A/house_sparrow/Slovenia/PER351-23MA_23VIR10323-19/2023	University of Ljubljana	Istituto Zooprofilattico Sperimentale Delle Venezie	Salomoni, A.; Slavec, B.; Cociancich, V.; Zecchin, B.; Fusaro, A.; Schivo, A.; Salviato, A.; Palumbo, E.; Giussani, E.; Pastori, A.; Savegnago, E.; Monne, I.; Terregino, C.
EPI2820693	HA	Slovenia	2023-May-31	EPI_ISL_18612229	A/mediterranean_gull/Slovenia/PER1054-23M6A_23VIR10323-18/2023	University of Ljubljana	Istituto Zooprofilattico Sperimentale Delle Venezie	Salomoni, A.; Slavec, B.; Cociancich, V.; Zecchin, B.; Fusaro, A.; Schivo, A.; Salviato, A.; Palumbo, E.; Giussani, E.; Pastori, A.; Savegnago, E.; Monne, I.; Terregino, C.
EPI2820685	HA	Slovenia	2023-May-31	EPI_ISL_18612228	A/black-headed_gull/Slovenia/PER1054-23T4A_23VIR10323-16/2023	University of Ljubljana	Istituto Zooprofilattico Sperimentale Delle Venezie	Salomoni, A.; Slavec, B.; Cociancich, V.; Zecchin, B.; Fusaro, A.; Schivo, A.; Salviato, A.; Palumbo, E.; Giussani, E.; Pastori, A.; Savegnago, E.; Monne, I.; Terregino, C.
EPI2820677	HA	Slovenia	2023-May-31	EPI_ISL_18612227	A/common_tern/Slovenia/PER1054-23K2A_23VIR10323-14/2023	University of Ljubljana	Istituto Zooprofilattico Sperimentale Delle Venezie	Salomoni, A.; Slavec, B.; Cociancich, V.; Zecchin, B.; Fusaro, A.; Schivo, A.; Salviato, A.; Palumbo, E.; Giussani, E.; Pastori, A.; Savegnago, E.; Monne, I.; Terregino, C.
EPI2820669	HA	Slovenia	2023-Mar-17	EPI_ISL_18612226	A/black-headed_gull/Slovenia/PER_495-23ma_23VIR10323-13/2023	University of Ljubljana	Istituto Zooprofilattico Sperimentale Delle Venezie	Salomoni, A.; Slavec, B.; Cociancich, V.; Zecchin, B.; Fusaro, A.; Schivo, A.; Salviato, A.; Palumbo, E.; Giussani, E.; Pastori, A.; Savegnago, E.; Monne, I.; Terregino, C.
EPI2820661	HA	Slovenia	2023-May-16	EPI_ISL_18612225	A/black-headed_gull/Slovenia/PER942-23T4A_23VIR10323-12/2023	University of Ljubljana	Istituto Zooprofilattico Sperimentale Delle Venezie	Salomoni, A.; Slavec, B.; Cociancich, V.; Zecchin, B.; Fusaro, A.; Schivo, A.; Salviato, A.; Palumbo, E.; Giussani, E.; Pastori, A.; Savegnago, E.; Monne, I.; Terregino, C.
EPI2586389	HA	Peru	2023-Apr-12	EPI_ISL_17777533	A/peruvian_booby/Peru/LIM-INS-012/2023	Laboratorio de Virus Respiratorios, Centro Nacional de Salud Publica	Instituto Nacional de Salud Peru	Padilla-Rojas, C.; Sevilla-Casta?eda, L.; Hurtado-Vela, C.; Silva-Molina, J.; Huarca-Balbin, L.; Lizarraga-Olivares, W.; Jimenez-Vasquez, V.; Lope-Pari, P.; Alarcon, Y.; Cuquian, K.; Jara-Vila, J.; Ceron-Villanueva, J.; Conza-Blanco, L.; Rojas-Serrano, N.; Arotinco-Garaygar, G.
EPI2586365	HA	Peru	2023-Mar-17	EPI_ISL_17777530	A/guanay_cormorant/Peru/CAL-INS-009/2023	Laboratorio de Virus Respiratorios, Centro Nacional de Salud Publica	Instituto Nacional de Salud Peru	Padilla-Rojas, C.; Sevilla-Casta?eda, L.; Hurtado-Vela, C.; Silva-Molina, J.; Huarca-Balbin, L.; Lizarraga-Olivares, W.; Jimenez-Vasquez, V.; Lope-Pari, P.; Alarcon, Y.; Cuquian, K.; Jara-Vila, J.; Ceron-Villanueva, J.; Conza-Blanco, L.; Rojas-Serrano, N.; Arotinco-Garaygar, G.
EPI2586357	HA	Peru	2023-Mar-17	EPI_ISL_17777529	A/peruvian_booby/Peru/CAL-INS-008/2023	Laboratorio de Virus Respiratorios, Centro Nacional de Salud Publica	Instituto Nacional de Salud Peru	Padilla-Rojas, C.; Sevilla-Casta?eda, L.; Hurtado-Vela, C.; Silva-Molina, J.; Huarca-Balbin, L.; Lizarraga-Olivares, W.; Jimenez-Vasquez, V.; Lope-Pari, P.; Alarcon, Y.; Cuquian, K.; Jara-Vila, J.; Ceron-Villanueva, J.; Conza-Blanco, L.; Rojas-Serrano, N.; Arotinco-Garaygar, G.
EPI2586349	HA	Peru	2023-Mar-17	EPI_ISL_17777528	A/peruvian_booby/Peru/CAL-INS-007/2023	Laboratorio de Virus Respiratorios, Centro Nacional de Salud Publica	Instituto Nacional de Salud Peru	Padilla-Rojas, C.; Sevilla-Casta?eda, L.; Hurtado-Vela, C.; Silva-Molina, J.; Huarca-Balbin, L.; Lizarraga-Olivares, W.; Jimenez-Vasquez, V.; Lope-Pari, P.; Alarcon, Y.; Cuquian, K.; Jara-Vila, J.; Ceron-Villanueva, J.; Conza-Blanco, L.; Rojas-Serrano, N.; Arotinco-Garaygar, G.
EPI2586325	HA	Peru	2023-Apr-03	EPI_ISL_17777525	A/peruvian_booby/Peru/LIM-INS-004/2023	Laboratorio de Virus Respiratorios, Centro Nacional de Salud Publica	Instituto Nacional de Salud Peru	Padilla-Rojas, C.; Sevilla-Casta?eda, L.; Hurtado-Vela, C.; Silva-Molina, J.; Huarca-Balbin, L.; Lizarraga-Olivares, W.; Jimenez-Vasquez, V.; Lope-Pari, P.; Alarcon, Y.; Cuquian, K.; Jara-Vila, J.; Ceron-Villanueva, J.; Conza-Blanco, L.; Rojas-Serrano, N.; Arotinco-Garaygar, G.
EPI2509923	HA	United Kingdom	2023-Mar-23	EPI_ISL_17465837	A/black-headed_gull/England/258716/2023	Animal and Plant Health Agency (APHA)	Animal and Plant Health Agency (APHA)
EPI2509915	HA	United Kingdom	2023-Mar-17	EPI_ISL_17465836	A/pink-footed_goose/Scotland/323521/2023	Animal and Plant Health Agency (APHA)	Animal and Plant Health Agency (APHA)
EPI2509867	HA	United Kingdom	2023-Mar-14	EPI_ISL_17465830	A/pink-footed_goose/Scotland/040819/2023	Animal and Plant Health Agency (APHA)	Animal and Plant Health Agency (APHA)
EPI2437366	HA	United Kingdom	2023-Jan-28	EPI_ISL_17072341	A/tawny_owl/England/397504/2023	Animal and Plant Health Agency (APHA)	Animal and Plant Health Agency (APHA)
EPI2296234	HA	Belgium	2022-Nov-08	EPI_ISL_16548347	A/Pelecanus_conspicillatus/Belgium/12905-0001/2022	Sciensano - Animal Infectious Diseases	Sciensano, Department of Animal Infectious Diseases	Van Borm, Steven; Roupie, Virginie; Hostyn, Pierre; Lambrecht, Benedicte; Steensels, Mieke
EPI2278345	HA	United Kingdom	2022-Dec-19	EPI_ISL_16384199	A/domestic_duck/England/170578/2022	Animal and Plant Health Agency (APHA)	Animal and Plant Health Agency (APHA)
EPI2278321	HA	United Kingdom	2022-Nov-30	EPI_ISL_16384196	A/canada_goose/England/395873/2022	Animal and Plant Health Agency (APHA)	Animal and Plant Health Agency (APHA)
EPI2278313	HA	United Kingdom	2022-Nov-30	EPI_ISL_16384195	A/mute_swan/England/395870/2022	Animal and Plant Health Agency (APHA)	Animal and Plant Health Agency (APHA)
EPI2278305	HA	United Kingdom	2022-Nov-25	EPI_ISL_16384194	A/greylag_goose/England/395808/2022	Animal and Plant Health Agency (APHA)	Animal and Plant Health Agency (APHA)
EPI2278289	HA	United Kingdom	2022-Dec-05	EPI_ISL_16384192	A/greylag_goose/England/334954/2022	Animal and Plant Health Agency (APHA)	Animal and Plant Health Agency (APHA)
EPI2278257	HA	United Kingdom	2022-Dec-01	EPI_ISL_16384188	A/mute_swan/England/334508/2022	Animal and Plant Health Agency (APHA)	Animal and Plant Health Agency (APHA)
EPI2278249	HA	United Kingdom	2022-Nov-24	EPI_ISL_16384187	A/mute_swan/England/333694/2022	Animal and Plant Health Agency (APHA)	Animal and Plant Health Agency (APHA)
EPI2278233	HA	United Kingdom	2022-Dec-06	EPI_ISL_16384185	A/pheasant/England/119956/2022	Animal and Plant Health Agency (APHA)	Animal and Plant Health Agency (APHA)
EPI2278209	HA	United Kingdom	2022-Dec-06	EPI_ISL_16384182	A/greylag_goose/England/119927/2022	Animal and Plant Health Agency (APHA)	Animal and Plant Health Agency (APHA)
EPI2278201	HA	United Kingdom	2022-Dec-06	EPI_ISL_16384181	A/mute_swan/England/119920/2022	Animal and Plant Health Agency (APHA)	Animal and Plant Health Agency (APHA)
EPI2278193	HA	United Kingdom	2022-Dec-06	EPI_ISL_16384180	A/greylag_goose/England/119911/2022	Animal and Plant Health Agency (APHA)	Animal and Plant Health Agency (APHA)
EPI2278185	HA	United Kingdom	2022-Dec-05	EPI_ISL_16384179	A/mute_swan/England/119898/2022	Animal and Plant Health Agency (APHA)	Animal and Plant Health Agency (APHA)
EPI2278177	HA	United Kingdom	2022-Nov-30	EPI_ISL_16384178	A/canada_goose/England/119770/2022	Animal and Plant Health Agency (APHA)	Animal and Plant Health Agency (APHA)
EPI2278169	HA	United Kingdom	2022-Dec-01	EPI_ISL_16384177	A/canada_goose/England/119759/2022	Animal and Plant Health Agency (APHA)	Animal and Plant Health Agency (APHA)
EPI2278161	HA	United Kingdom	2022-Nov-30	EPI_ISL_16384176	A/mute_swan/England/119728/2022	Animal and Plant Health Agency (APHA)	Animal and Plant Health Agency (APHA)
EPI2278153	HA	United Kingdom	2022-Dec-01	EPI_ISL_16384175	A/mute_swan/England/119719/2022	Animal and Plant Health Agency (APHA)	Animal and Plant Health Agency (APHA)
EPI2278137	HA	United Kingdom	2022-Dec-01	EPI_ISL_16384173	A/black-headed_gull/England/119699/2022	Animal and Plant Health Agency (APHA)	Animal and Plant Health Agency (APHA)
EPI2278129	HA	United Kingdom	2022-Nov-23	EPI_ISL_16384172	A/domestic_goose/England/119665/2022	Animal and Plant Health Agency (APHA)	Animal and Plant Health Agency (APHA)
EPI2278105	HA	United Kingdom	2022-Dec-03	EPI_ISL_16384169	A/peregrine_falcon/England/255567/2022	Animal and Plant Health Agency (APHA)	Animal and Plant Health Agency (APHA)
EPI2278097	HA	United Kingdom	2022-Nov-30	EPI_ISL_16384168	A/greylag_goose/England/255248/2022	Animal and Plant Health Agency (APHA)	Animal and Plant Health Agency (APHA)
EPI2278089	HA	United Kingdom	2022-Dec-04	EPI_ISL_16384167	A/greylag_goose/England/316980/2022	Animal and Plant Health Agency (APHA)	Animal and Plant Health Agency (APHA)
EPI2278081	HA	United Kingdom	2022-Nov-22	EPI_ISL_16384166	A/mute_swan/Scotland/164387/2022	Animal and Plant Health Agency (APHA)	Animal and Plant Health Agency (APHA)
EPI2278073	HA	United Kingdom	2022-Nov-24	EPI_ISL_16384165	A/pink-footed_goose/Scotland/163839/2022	Animal and Plant Health Agency (APHA)	Animal and Plant Health Agency (APHA)
EPI2278057	HA	United Kingdom	2022-Dec-14	EPI_ISL_16384163	A/domestic_goose/England/169312/2022	Animal and Plant Health Agency (APHA)	Animal and Plant Health Agency (APHA)
EPI2278041	HA	United Kingdom	2022-Dec-06	EPI_ISL_16384161	A/domestic_duck/England/164793/2022	Animal and Plant Health Agency (APHA)	Animal and Plant Health Agency (APHA)
EPI2278025	HA	United Kingdom	2022-Dec-04	EPI_ISL_16384159	A/Humboldt_penguin/England/161651/2022	Animal and Plant Health Agency (APHA)	Animal and Plant Health Agency (APHA)
EPI2278017	HA	United Kingdom	2022-Nov-29	EPI_ISL_16384158	A/Domestic_Goose/England/161197/2022	Animal and Plant Health Agency (APHA)	Animal and Plant Health Agency (APHA)
EPI2278009	HA	United Kingdom	2022-Nov-29	EPI_ISL_16384157	A/Peregrine_falcon/England/161113/2022	Animal and Plant Health Agency (APHA)	Animal and Plant Health Agency (APHA)
EPI2278001	HA	United Kingdom	2022-Nov-28	EPI_ISL_16384156	A/Domestic_duck/England/159770/2022	Animal and Plant Health Agency (APHA)	Animal and Plant Health Agency (APHA)
EPI2277969	HA	United Kingdom	2022-Nov-17	EPI_ISL_16384152	A/Barnacle_goose/Northern_Ireland/159014/2022	Animal and Plant Health Agency (APHA)	Animal and Plant Health Agency (APHA)
EPI2277905	HA	United Kingdom	2022-Nov-19	EPI_ISL_16384144	A/Domestic_duck/England/154301/2022	Animal and Plant Health Agency (APHA)	Animal and Plant Health Agency (APHA)
EPI2277873	HA	United Kingdom	2022-Nov-16	EPI_ISL_16384140	A/Domestic_goose/England/153783/2022	Animal and Plant Health Agency (APHA)	Animal and Plant Health Agency (APHA)
EPI2277857	HA	United Kingdom	2022-Oct-14	EPI_ISL_16384138	A/domestic_goose/England/132125/2022	Animal and Plant Health Agency (APHA)	Animal and Plant Health Agency (APHA)
EPI2277849	HA	United Kingdom	2022-Oct-20	EPI_ISL_16384137	A/domestic_duck/England/137953/2022	Animal and Plant Health Agency (APHA)	Animal and Plant Health Agency (APHA)
EPI2277825	HA	United Kingdom	2022-Oct-28	EPI_ISL_16384127	A/grey_heron/England/142125/2022	Animal and Plant Health Agency (APHA)	Animal and Plant Health Agency (APHA)
EPI2277817	HA	United Kingdom	2022-Nov-08	EPI_ISL_16384126	A/peregrine_falcon/England/254313/2022	Animal and Plant Health Agency (APHA)	Animal and Plant Health Agency (APHA)
EPI2277809	HA	United Kingdom	2022-Oct-31	EPI_ISL_16384125	A/pheasant/England/331075/2022	Animal and Plant Health Agency (APHA)	Animal and Plant Health Agency (APHA)
EPI2244367	HA	Germany	2022-Jul-08	EPI_ISL_16122154	A/northern gannet/Germany-NI/AI04234/2022	Lebensmittel- und Veterinärinstitut Oldenburg - Standort Veterinärinstitut	Friedrich-Loeffler-Institut
EPI2244343	HA	Germany	2022-Jul-13	EPI_ISL_16122151	A/Eurasian spoonbill/Germany-SH/AI04243/2022	Landeslabor Schleswig-Holstein	Friedrich-Loeffler-Institut
EPI2233146	HA	United Kingdom	2022-Oct-21	EPI_ISL_15958027	A/Pheasant/Wales/394561/2022	Animal and Plant Health Agency (APHA)	Animal and Plant Health Agency (APHA)	Byrne, A.; Howton, N.; Maskell, D.; Mollett, B.; Peers-Dent, J.
EPI2150878	HA	Sweden	2022-Jun-09	EPI_ISL_14811930	A/Sandwich tern/Sweden/SVA220623SZ0237/FB001997/K-2022	Swedish Veterinary Agency (SVA)	Swedish Veterinary Agency (SVA)
EPI2150870	HA	Sweden	2022-Jun-15	EPI_ISL_14811929	A/northern gannet/Sweden/SVA220623SZ0232/FB001984/N-2022	Swedish Veterinary Agency (SVA)	Swedish Veterinary Agency (SVA)
EPI2150862	HA	Sweden	2022-Jun-20	EPI_ISL_14811896	A/northern gannet/Sweden/SVA220623SZ0232/FB001982/O-2022	Swedish Veterinary Agency (SVA)	Swedish Veterinary Agency (SVA)
EPI2150691	HA	Sweden	2022-Jun-13	EPI_ISL_14811829	A/Sandwich tern/Sweden/SVA220617SZ0303/FB001933/K-2022	Swedish Veterinary Agency (SVA)	Swedish Veterinary Agency (SVA)
EPI2150683	HA	Sweden	2022-Jun-13	EPI_ISL_14811828	A/Sandwich tern/Sweden/SVA220617SZ0291/FB001930/K-2022	Swedish Veterinary Agency (SVA)	Swedish Veterinary Agency (SVA)
EPI2150659	HA	Sweden	2022-Jun-13	EPI_ISL_14811825	A/Sandwich tern/Sweden/SVA220617SZ0291/FB001903/K-2022	Swedish Veterinary Agency (SVA)	Swedish Veterinary Agency (SVA)
EPI1947436	HA	Netherlands	2021-Nov-20	EPI_ISL_7996370	A/western jackdaw/Netherlands/21039294-002/2021	Wageningen Bioveterinary Research	Wageningen Bioveterinary Research	Beerens, Nancy; Harders, Frank; Pritz-Verschuren, Sylvia; Roose, Marit; Venema, Sandra; Germeraad, Evelien; Engelsma, Marc; Heutink, Rene
EPI3210154	HA	Japan	2024-Mar-28	EPI_ISL_19055104	A/large-billed crow/Hokkaido/B124/2024	Graduate School of Veterinary Medicine, Hokkaido University	Graduate School of Veterinary Medicine, Hokkaido University	Yoshihiro, Sakoda; Norikazu, Isoda; Takahiro, Hiono; Yik Lim, Hew
EPI3209653	HA	Japan	2024-Mar-17	EPI_ISL_19055088	A/large-billed crow/Hokkaido/B121/2024	Graduate School of Veterinary Medicine, Hokkaido University	Graduate School of Veterinary Medicine, Hokkaido University	Yoshihiro, Sakoda; Norikazu, Isoda; Takahiro, Hiono; Yik Lim, Hew
EPI2869844	HA	United States	2023-Oct-16	EPI_ISL_18695162	A/turkey/Minnesota/23-031477-002/2023	National Veterinary Services Laboratories - USDA	National Veterinary Services Laboratories - USDA	Franzen,Kerrie;Love,Emily;Ozella,Mikaela;Killian,Mary;Lantz,Kristina;Stuber,Tod;Hicks,Jessica;Norris,Cameron
EPI2869836	HA	United States	2023-Oct-16	EPI_ISL_18695161	A/turkey/Minnesota/23-031477-001/2023	National Veterinary Services Laboratories - USDA	National Veterinary Services Laboratories - USDA	Franzen,Kerrie;Love,Emily;Ozella,Mikaela;Killian,Mary;Lantz,Kristina;Stuber,Tod;Hicks,Jessica;Norris,Cameron
EPI2869828	HA	United States	2023-Oct-16	EPI_ISL_18695160	A/Muscovy duck/Washington/23-031346-002/2023	National Veterinary Services Laboratories - USDA	National Veterinary Services Laboratories - USDA	Franzen,Kerrie;Love,Emily;Ozella,Mikaela;Killian,Mary;Lantz,Kristina;Stuber,Tod;Hicks,Jessica;Norris,Cameron
EPI2869820	HA	United States	2023-Oct-15	EPI_ISL_18695159	A/turkey/Minnesota/23-031337-003/2023	National Veterinary Services Laboratories - USDA	National Veterinary Services Laboratories - USDA	Franzen,Kerrie;Love,Emily;Ozella,Mikaela;Killian,Mary;Lantz,Kristina;Stuber,Tod;Hicks,Jessica;Norris,Cameron
EPI2869812	HA	United States	2023-Oct-15	EPI_ISL_18695158	A/turkey/Minnesota/23-031337-002/2023	National Veterinary Services Laboratories - USDA	National Veterinary Services Laboratories - USDA	Franzen,Kerrie;Love,Emily;Ozella,Mikaela;Killian,Mary;Lantz,Kristina;Stuber,Tod;Hicks,Jessica;Norris,Cameron
EPI2869804	HA	United States	2023-Oct-15	EPI_ISL_18695157	A/turkey/Minnesota/23-031337-001/2023	National Veterinary Services Laboratories - USDA	National Veterinary Services Laboratories - USDA	Franzen,Kerrie;Love,Emily;Ozella,Mikaela;Killian,Mary;Lantz,Kristina;Stuber,Tod;Hicks,Jessica;Norris,Cameron
EPI2869796	HA	United States	2023-Oct-12	EPI_ISL_18695156	A/peregrine falcon/Minnesota/23-031335-001/2023	National Veterinary Services Laboratories - USDA	National Veterinary Services Laboratories - USDA	Franzen,Kerrie;Love,Emily;Ozella,Mikaela;Killian,Mary;Lantz,Kristina;Stuber,Tod;Hicks,Jessica;Norris,Cameron
EPI2869788	HA	United States	2023-Oct-13	EPI_ISL_18695155	A/turkey/South Dakota/23-031331-002/2023	National Veterinary Services Laboratories - USDA	National Veterinary Services Laboratories - USDA	Franzen,Kerrie;Love,Emily;Ozella,Mikaela;Killian,Mary;Lantz,Kristina;Stuber,Tod;Hicks,Jessica;Norris,Cameron
EPI2869780	HA	United States	2023-Oct-13	EPI_ISL_18695154	A/turkey/South Dakota/23-031331-001/2023	National Veterinary Services Laboratories - USDA	National Veterinary Services Laboratories - USDA	Franzen,Kerrie;Love,Emily;Ozella,Mikaela;Killian,Mary;Lantz,Kristina;Stuber,Tod;Hicks,Jessica;Norris,Cameron
EPI2869772	HA	United States	2023-Oct-14	EPI_ISL_18695153	A/turkey/South Dakota/23-031328-002/2023	National Veterinary Services Laboratories - USDA	National Veterinary Services Laboratories - USDA	Franzen,Kerrie;Love,Emily;Ozella,Mikaela;Killian,Mary;Lantz,Kristina;Stuber,Tod;Hicks,Jessica;Norris,Cameron
EPI2869764	HA	United States	2023-Oct-14	EPI_ISL_18695152	A/turkey/South Dakota/23-031328-001/2023	National Veterinary Services Laboratories - USDA	National Veterinary Services Laboratories - USDA	Franzen,Kerrie;Love,Emily;Ozella,Mikaela;Killian,Mary;Lantz,Kristina;Stuber,Tod;Hicks,Jessica;Norris,Cameron
EPI2869756	HA	United States	2023-Oct-11	EPI_ISL_18695151	A/turkey/Minnesota/23-031338-001/2023	National Veterinary Services Laboratories - USDA	National Veterinary Services Laboratories - USDA	Franzen,Kerrie;Love,Emily;Ozella,Mikaela;Killian,Mary;Lantz,Kristina;Stuber,Tod;Hicks,Jessica;Norris,Cameron
EPI2917695	HA	Japan	2023-Nov-27	EPI_ISL_18612263	A/Common teal/Kagoshima/KU-6/2023 (H5N1)	Kagoshima University	Kagoshima University
EPI2823731	HA	Japan	2023-Nov-15	EPI_ISL_18612256	A/Eurasian wigeon/Kagoshima/KU-4/2023 (H5N1)	Kagoshima University	Kagoshima University
EPI2778898	HA	Germany	2023-Sep-07	EPI_ISL_18432789	A/peregrine falcon/Germany-NI/2023AI07594/2023	Friedrich-Loeffler-Institut	Friedrich-Loeffler-Institut
EPI2778891	HA	Germany	2023-May-22	EPI_ISL_18432788	A/chicken/Germany-BY/2023AI04818-AK5023/2023	Friedrich-Loeffler-Institut	Friedrich-Loeffler-Institut
EPI2651382	HA	United States	2022-Apr-16	EPI_ISL_18039387	A/Black_Vulture/Florida/22-012333-001/2022	National Veterinary Services Laboratories - USDA	Centers for Disease Control and Prevention
EPI2638757	HA	Germany	2022-Jan-10	EPI_ISL_18006920	A/red knot/Germany-SH/AI00616/2022	Friedrich-Loeffler-Institut	Friedrich-Loeffler-Institut
EPI2530127	HA	Netherlands	2023-Apr-11	EPI_ISL_17547375	A/Great black-backed gull/Netherlands/4/2023	Erasmus Medical Center	Erasmus Medical Center
EPI2530119	HA	Netherlands	2023-Apr-03	EPI_ISL_17547374	A/European herring gull/Netherlands/13/2023	Erasmus Medical Center	Erasmus Medical Center
EPI2530111	HA	Netherlands	2023-Apr-11	EPI_ISL_17547373	A/European herring gull/Netherlands/12/2023	Erasmus Medical Center	Erasmus Medical Center
EPI2530103	HA	Netherlands	2023-Apr-07	EPI_ISL_17547372	A/Black-headed gull/Netherlands/36/2023	Erasmus Medical Center	Erasmus Medical Center
EPI2530095	HA	Netherlands	2023-Apr-03	EPI_ISL_17547371	A/Black-headed gull/Netherlands/35/2023	Erasmus Medical Center	Erasmus Medical Center
EPI2530087	HA	Netherlands	2023-Apr-01	EPI_ISL_17547370	A/Black-headed gull/Netherlands/34/2023	Erasmus Medical Center	Erasmus Medical Center
EPI2530079	HA	Netherlands	2023-Mar-30	EPI_ISL_17547369	A/Black-headed gull/Netherlands/33/2023	Erasmus Medical Center	Erasmus Medical Center
EPI2530071	HA	Netherlands	2023-Mar-30	EPI_ISL_17547368	A/Black-headed gull/Netherlands/32/2023	Erasmus Medical Center	Erasmus Medical Center
EPI2530063	HA	Netherlands	2023-Mar-30	EPI_ISL_17547367	A/Black-headed gull/Netherlands/31/2023	Erasmus Medical Center	Erasmus Medical Center
EPI2530055	HA	Netherlands	2023-Mar-30	EPI_ISL_17547366	A/Black-headed gull/Netherlands/30/2023	Erasmus Medical Center	Erasmus Medical Center
EPI2530047	HA	Netherlands	2023-Mar-29	EPI_ISL_17547365	A/Black-headed gull/Netherlands/29/2023	Erasmus Medical Center	Erasmus Medical Center
EPI2246832	HA	United States	2022-May-02	EPI_ISL_16171524	A/chicken/Montana/22-013942-002/2022	National Veterinary Services Laboratories - USDA	National Veterinary Services Laboratories - USDA	Chinh,Thanh;Love, Emily;Franzen,Kerrie;Killian,Mary;Koster,Leo;Lantz,Kristina;Stuber,Tod;Hicks,Jessica
EPI2246824	HA	United States	2022-May-02	EPI_ISL_16171523	A/chicken/Montana/22-013942-001/2022	National Veterinary Services Laboratories - USDA	National Veterinary Services Laboratories - USDA	Chinh,Thanh;Love, Emily;Franzen,Kerrie;Killian,Mary;Koster,Leo;Lantz,Kristina;Stuber,Tod;Hicks,Jessica
EPI2246816	HA	United States	2022-May-02	EPI_ISL_16171522	A/goose/Oregon/22-013779-001/2022	National Veterinary Services Laboratories - USDA	National Veterinary Services Laboratories - USDA	Chinh,Thanh;Love, Emily;Franzen,Kerrie;Killian,Mary;Koster,Leo;Lantz,Kristina;Stuber,Tod;Hicks,Jessica
EPI2246808	HA	United States	2022-May-03	EPI_ISL_16171521	A/chicken/Wisconsin/22-013776-001/2022	National Veterinary Services Laboratories - USDA	National Veterinary Services Laboratories - USDA	Chinh,Thanh;Love, Emily;Franzen,Kerrie;Killian,Mary;Koster,Leo;Lantz,Kristina;Stuber,Tod;Hicks,Jessica
EPI2246800	HA	United States	2022-May-03	EPI_ISL_16171520	A/chicken/Washington/22-013763-003/2022	National Veterinary Services Laboratories - USDA	National Veterinary Services Laboratories - USDA	Chinh,Thanh;Love, Emily;Franzen,Kerrie;Killian,Mary;Koster,Leo;Lantz,Kristina;Stuber,Tod;Hicks,Jessica
EPI2246792	HA	United States	2022-May-03	EPI_ISL_16171519	A/chicken/Washington/22-013763-002/2022	National Veterinary Services Laboratories - USDA	National Veterinary Services Laboratories - USDA	Chinh,Thanh;Love, Emily;Franzen,Kerrie;Killian,Mary;Koster,Leo;Lantz,Kristina;Stuber,Tod;Hicks,Jessica
EPI2246784	HA	United States	2022-May-03	EPI_ISL_16171518	A/chicken/Minnesota/22-013752-001/2022	National Veterinary Services Laboratories - USDA	National Veterinary Services Laboratories - USDA	Chinh,Thanh;Love, Emily;Franzen,Kerrie;Killian,Mary;Koster,Leo;Lantz,Kristina;Stuber,Tod;Hicks,Jessica
EPI2246776	HA	United States	2022-May-02	EPI_ISL_16171517	A/turkey/Utah/22-013612-001/2022	National Veterinary Services Laboratories - USDA	National Veterinary Services Laboratories - USDA	Chinh,Thanh;Love, Emily;Franzen,Kerrie;Killian,Mary;Koster,Leo;Lantz,Kristina;Stuber,Tod;Hicks,Jessica
EPI2246768	HA	United States	2022-May-02	EPI_ISL_16171516	A/duck/Minnesota/22-013605-003/2022	National Veterinary Services Laboratories - USDA	National Veterinary Services Laboratories - USDA	Chinh,Thanh;Love, Emily;Franzen,Kerrie;Killian,Mary;Koster,Leo;Lantz,Kristina;Stuber,Tod;Hicks,Jessica
EPI2246752	HA	United States	2022-May-02	EPI_ISL_16171514	A/duck/Minnesota/22-013605-001/2022	National Veterinary Services Laboratories - USDA	National Veterinary Services Laboratories - USDA	Chinh,Thanh;Love, Emily;Franzen,Kerrie;Killian,Mary;Koster,Leo;Lantz,Kristina;Stuber,Tod;Hicks,Jessica
EPI2246744	HA	United States	2022-Apr-29	EPI_ISL_16171513	A/chicken/South Dakota/22-013554-001/2022	National Veterinary Services Laboratories - USDA	National Veterinary Services Laboratories - USDA	Chinh,Thanh;Love, Emily;Franzen,Kerrie;Killian,Mary;Koster,Leo;Lantz,Kristina;Stuber,Tod;Hicks,Jessica
EPI2246736	HA	United States	2022-May-02	EPI_ISL_16171512	A/turkey/South Dakota/22-013547-001/2022	National Veterinary Services Laboratories - USDA	National Veterinary Services Laboratories - USDA	Chinh,Thanh;Love, Emily;Franzen,Kerrie;Killian,Mary;Koster,Leo;Lantz,Kristina;Stuber,Tod;Hicks,Jessica
EPI2246728	HA	United States	2022-Apr-30	EPI_ISL_16171511	A/turkey/South Dakota/22-013454-002/2022	National Veterinary Services Laboratories - USDA	National Veterinary Services Laboratories - USDA	Chinh,Thanh;Love, Emily;Franzen,Kerrie;Killian,Mary;Koster,Leo;Lantz,Kristina;Stuber,Tod;Hicks,Jessica
EPI2246720	HA	United States	2022-Apr-30	EPI_ISL_16171510	A/turkey/South Dakota/22-013454-001/2022	National Veterinary Services Laboratories - USDA	National Veterinary Services Laboratories - USDA	Chinh,Thanh;Love, Emily;Franzen,Kerrie;Killian,Mary;Koster,Leo;Lantz,Kristina;Stuber,Tod;Hicks,Jessica
EPI2246712	HA	United States	2022-May-01	EPI_ISL_16171509	A/turkey/Wisconsin/22-013448-002/2022	National Veterinary Services Laboratories - USDA	National Veterinary Services Laboratories - USDA	Chinh,Thanh;Love, Emily;Franzen,Kerrie;Killian,Mary;Koster,Leo;Lantz,Kristina;Stuber,Tod;Hicks,Jessica
EPI2246704	HA	United States	2022-May-01	EPI_ISL_16171508	A/turkey/Wisconsin/22-013448-001/2022	National Veterinary Services Laboratories - USDA	National Veterinary Services Laboratories - USDA	Chinh,Thanh;Love, Emily;Franzen,Kerrie;Killian,Mary;Koster,Leo;Lantz,Kristina;Stuber,Tod;Hicks,Jessica
EPI2246696	HA	United States	2022-Apr-30	EPI_ISL_16171507	A/turkey/Wisconsin/22-013447-002/2022	National Veterinary Services Laboratories - USDA	National Veterinary Services Laboratories - USDA	Chinh,Thanh;Love, Emily;Franzen,Kerrie;Killian,Mary;Koster,Leo;Lantz,Kristina;Stuber,Tod;Hicks,Jessica
EPI2246688	HA	United States	2022-Apr-30	EPI_ISL_16171506	A/turkey/Wisconsin/22-013447-001/2022	National Veterinary Services Laboratories - USDA	National Veterinary Services Laboratories - USDA	Chinh,Thanh;Love, Emily;Franzen,Kerrie;Killian,Mary;Koster,Leo;Lantz,Kristina;Stuber,Tod;Hicks,Jessica
EPI2246680	HA	United States	2022-Apr-29	EPI_ISL_16171505	A/chicken/Wisconsin/22-013446-001/2022	National Veterinary Services Laboratories - USDA	National Veterinary Services Laboratories - USDA	Chinh,Thanh;Love, Emily;Franzen,Kerrie;Killian,Mary;Koster,Leo;Lantz,Kristina;Stuber,Tod;Hicks,Jessica
EPI2246672	HA	United States	2022-Apr-27	EPI_ISL_16171504	A/chicken/Wisconsin/22-013445-001/2022	National Veterinary Services Laboratories - USDA	National Veterinary Services Laboratories - USDA	Chinh,Thanh;Love, Emily;Franzen,Kerrie;Killian,Mary;Koster,Leo;Lantz,Kristina;Stuber,Tod;Hicks,Jessica
EPI2246664	HA	United States	2022-Apr-30	EPI_ISL_16171503	A/turkey/Minnesota/22-013413-003/2022	National Veterinary Services Laboratories - USDA	National Veterinary Services Laboratories - USDA	Chinh,Thanh;Love, Emily;Franzen,Kerrie;Killian,Mary;Koster,Leo;Lantz,Kristina;Stuber,Tod;Hicks,Jessica
EPI2246656	HA	United States	2022-Apr-30	EPI_ISL_16171502	A/turkey/Minnesota/22-013413-002/2022	National Veterinary Services Laboratories - USDA	National Veterinary Services Laboratories - USDA	Chinh,Thanh;Love, Emily;Franzen,Kerrie;Killian,Mary;Koster,Leo;Lantz,Kristina;Stuber,Tod;Hicks,Jessica
EPI2246648	HA	United States	2022-Apr-30	EPI_ISL_16171501	A/chicken/Minnesota/22-013412-002/2022	National Veterinary Services Laboratories - USDA	National Veterinary Services Laboratories - USDA	Chinh,Thanh;Love, Emily;Franzen,Kerrie;Killian,Mary;Koster,Leo;Lantz,Kristina;Stuber,Tod;Hicks,Jessica
EPI2246640	HA	United States	2022-Apr-30	EPI_ISL_16171500	A/chicken/Minnesota/22-013412-001/2022	National Veterinary Services Laboratories - USDA	National Veterinary Services Laboratories - USDA	Chinh,Thanh;Love, Emily;Franzen,Kerrie;Killian,Mary;Koster,Leo;Lantz,Kristina;Stuber,Tod;Hicks,Jessica
EPI2246632	HA	United States	2022-May-02	EPI_ISL_16171499	A/chicken/Illinois/22-013392-002/2022	National Veterinary Services Laboratories - USDA	National Veterinary Services Laboratories - USDA	Chinh,Thanh;Love, Emily;Franzen,Kerrie;Killian,Mary;Koster,Leo;Lantz,Kristina;Stuber,Tod;Hicks,Jessica
EPI2246624	HA	United States	2022-May-02	EPI_ISL_16171498	A/chicken/Illinois/22-013392-001/2022	National Veterinary Services Laboratories - USDA	National Veterinary Services Laboratories - USDA	Chinh,Thanh;Love, Emily;Franzen,Kerrie;Killian,Mary;Koster,Leo;Lantz,Kristina;Stuber,Tod;Hicks,Jessica
EPI2246616	HA	United States	2022-Apr-30	EPI_ISL_16171497	A/chicken/Wisconsin/22-013373-002/2022	National Veterinary Services Laboratories - USDA	National Veterinary Services Laboratories - USDA	Chinh,Thanh;Love, Emily;Franzen,Kerrie;Killian,Mary;Koster,Leo;Lantz,Kristina;Stuber,Tod;Hicks,Jessica
EPI2246608	HA	United States	2022-Apr-30	EPI_ISL_16171496	A/duck/Wisconsin/22-013373-001/2022	National Veterinary Services Laboratories - USDA	National Veterinary Services Laboratories - USDA	Chinh,Thanh;Love, Emily;Franzen,Kerrie;Killian,Mary;Koster,Leo;Lantz,Kristina;Stuber,Tod;Hicks,Jessica
EPI2246600	HA	United States	2022-May-02	EPI_ISL_16171495	A/duck/Pennsylvania/22-013368-002/2022	National Veterinary Services Laboratories - USDA	National Veterinary Services Laboratories - USDA	Chinh,Thanh;Love, Emily;Franzen,Kerrie;Killian,Mary;Koster,Leo;Lantz,Kristina;Stuber,Tod;Hicks,Jessica
EPI2246592	HA	United States	2022-Apr-29	EPI_ISL_16171494	A/chicken/Michigan/22-013224-001/2022	National Veterinary Services Laboratories - USDA	National Veterinary Services Laboratories - USDA	Chinh,Thanh;Love, Emily;Franzen,Kerrie;Killian,Mary;Koster,Leo;Lantz,Kristina;Stuber,Tod;Hicks,Jessica
EPI2246584	HA	United States	2022-Apr-29	EPI_ISL_16171493	A/chicken/Minnesota/22-013223-003/2022	National Veterinary Services Laboratories - USDA	National Veterinary Services Laboratories - USDA	Chinh,Thanh;Love, Emily;Franzen,Kerrie;Killian,Mary;Koster,Leo;Lantz,Kristina;Stuber,Tod;Hicks,Jessica
EPI2246576	HA	United States	2022-Apr-29	EPI_ISL_16171492	A/chicken/Minnesota/22-013223-001/2022	National Veterinary Services Laboratories - USDA	National Veterinary Services Laboratories - USDA	Chinh,Thanh;Love, Emily;Franzen,Kerrie;Killian,Mary;Koster,Leo;Lantz,Kristina;Stuber,Tod;Hicks,Jessica
EPI2246568	HA	United States	2022-Apr-28	EPI_ISL_16171491	A/goose/Minnesota/22-013222-005/2022	National Veterinary Services Laboratories - USDA	National Veterinary Services Laboratories - USDA	Chinh,Thanh;Love, Emily;Franzen,Kerrie;Killian,Mary;Koster,Leo;Lantz,Kristina;Stuber,Tod;Hicks,Jessica
EPI2246560	HA	United States	2022-Apr-28	EPI_ISL_16171490	A/goose/Minnesota/22-013222-004/2022	National Veterinary Services Laboratories - USDA	National Veterinary Services Laboratories - USDA	Chinh,Thanh;Love, Emily;Franzen,Kerrie;Killian,Mary;Koster,Leo;Lantz,Kristina;Stuber,Tod;Hicks,Jessica
EPI2246544	HA	United States	2022-Apr-28	EPI_ISL_16171488	A/chicken/Minnesota/22-013222-001/2022	National Veterinary Services Laboratories - USDA	National Veterinary Services Laboratories - USDA	Chinh,Thanh;Love, Emily;Franzen,Kerrie;Killian,Mary;Koster,Leo;Lantz,Kristina;Stuber,Tod;Hicks,Jessica
EPI2246536	HA	United States	2022-Apr-28	EPI_ISL_16171487	A/duck/Minnesota/22-013221-004/2022	National Veterinary Services Laboratories - USDA	National Veterinary Services Laboratories - USDA	Chinh,Thanh;Love, Emily;Franzen,Kerrie;Killian,Mary;Koster,Leo;Lantz,Kristina;Stuber,Tod;Hicks,Jessica
EPI2246528	HA	United States	2022-Apr-28	EPI_ISL_16171486	A/duck/Minnesota/22-013221-003/2022	National Veterinary Services Laboratories - USDA	National Veterinary Services Laboratories - USDA	Chinh,Thanh;Love, Emily;Franzen,Kerrie;Killian,Mary;Koster,Leo;Lantz,Kristina;Stuber,Tod;Hicks,Jessica
EPI2246520	HA	United States	2022-Apr-28	EPI_ISL_16171485	A/goose/Minnesota/22-013221-002/2022	National Veterinary Services Laboratories - USDA	National Veterinary Services Laboratories - USDA	Chinh,Thanh;Love, Emily;Franzen,Kerrie;Killian,Mary;Koster,Leo;Lantz,Kristina;Stuber,Tod;Hicks,Jessica
EPI2246504	HA	United States	2022-Apr-28	EPI_ISL_16171483	A/chicken/Oklahoma/22-013220-002/2022	National Veterinary Services Laboratories - USDA	National Veterinary Services Laboratories - USDA	Chinh,Thanh;Love, Emily;Franzen,Kerrie;Killian,Mary;Koster,Leo;Lantz,Kristina;Stuber,Tod;Hicks,Jessica
EPI2246496	HA	United States	2022-Apr-28	EPI_ISL_16171482	A/chicken/Oklahoma/22-013220-001/2022	National Veterinary Services Laboratories - USDA	National Veterinary Services Laboratories - USDA	Chinh,Thanh;Love, Emily;Franzen,Kerrie;Killian,Mary;Koster,Leo;Lantz,Kristina;Stuber,Tod;Hicks,Jessica
EPI2246488	HA	United States	2022-Apr-28	EPI_ISL_16171481	A/Pekin duck/Pennsylvania/22-013189-004/2022	National Veterinary Services Laboratories - USDA	National Veterinary Services Laboratories - USDA	Chinh,Thanh;Love, Emily;Franzen,Kerrie;Killian,Mary;Koster,Leo;Lantz,Kristina;Stuber,Tod;Hicks,Jessica
EPI2246480	HA	United States	2022-Apr-28	EPI_ISL_16171480	A/Pekin duck/Pennsylvania/22-013189-003/2022	National Veterinary Services Laboratories - USDA	National Veterinary Services Laboratories - USDA	Chinh,Thanh;Love, Emily;Franzen,Kerrie;Killian,Mary;Koster,Leo;Lantz,Kristina;Stuber,Tod;Hicks,Jessica
EPI2246472	HA	United States	2022-Apr-26	EPI_ISL_16171479	A/peacock/Wisconsin/22-013183-005/2022	National Veterinary Services Laboratories - USDA	National Veterinary Services Laboratories - USDA	Chinh,Thanh;Love, Emily;Franzen,Kerrie;Killian,Mary;Koster,Leo;Lantz,Kristina;Stuber,Tod;Hicks,Jessica
EPI2246464	HA	United States	2022-Apr-26	EPI_ISL_16171478	A/domestic duck/Wisconsin/22-013183-004/2022	National Veterinary Services Laboratories - USDA	National Veterinary Services Laboratories - USDA	Chinh,Thanh;Love, Emily;Franzen,Kerrie;Killian,Mary;Koster,Leo;Lantz,Kristina;Stuber,Tod;Hicks,Jessica
EPI2246456	HA	United States	2022-Apr-26	EPI_ISL_16171477	A/guinea fowl/Wisconsin/22-013183-003/2022	National Veterinary Services Laboratories - USDA	National Veterinary Services Laboratories - USDA	Chinh,Thanh;Love, Emily;Franzen,Kerrie;Killian,Mary;Koster,Leo;Lantz,Kristina;Stuber,Tod;Hicks,Jessica
EPI2246448	HA	United States	2022-Apr-26	EPI_ISL_16171476	A/turkey/Wisconsin/22-013183-002/2022	National Veterinary Services Laboratories - USDA	National Veterinary Services Laboratories - USDA	Chinh,Thanh;Love, Emily;Franzen,Kerrie;Killian,Mary;Koster,Leo;Lantz,Kristina;Stuber,Tod;Hicks,Jessica
EPI2246440	HA	United States	2022-Apr-28	EPI_ISL_16171475	A/chicken/Alaska/22-013107-002/2022	National Veterinary Services Laboratories - USDA	National Veterinary Services Laboratories - USDA	Chinh,Thanh;Love, Emily;Franzen,Kerrie;Killian,Mary;Koster,Leo;Lantz,Kristina;Stuber,Tod;Hicks,Jessica
EPI2246432	HA	United States	2022-Apr-28	EPI_ISL_16171474	A/chicken/Alaska/22-013107-001/2022	National Veterinary Services Laboratories - USDA	National Veterinary Services Laboratories - USDA	Chinh,Thanh;Love, Emily;Franzen,Kerrie;Killian,Mary;Koster,Leo;Lantz,Kristina;Stuber,Tod;Hicks,Jessica
EPI2246424	HA	United States	2022-Apr-26	EPI_ISL_16171473	A/chicken/Nebraska/22-013105-001/2022	National Veterinary Services Laboratories - USDA	National Veterinary Services Laboratories - USDA	Chinh,Thanh;Love, Emily;Franzen,Kerrie;Killian,Mary;Koster,Leo;Lantz,Kristina;Stuber,Tod;Hicks,Jessica
EPI2246416	HA	United States	2022-Apr-27	EPI_ISL_16171472	A/turkey/Minnesota/22-013084-002/2022	National Veterinary Services Laboratories - USDA	National Veterinary Services Laboratories - USDA	Chinh,Thanh;Love, Emily;Franzen,Kerrie;Killian,Mary;Koster,Leo;Lantz,Kristina;Stuber,Tod;Hicks,Jessica
EPI2246408	HA	United States	2022-Apr-27	EPI_ISL_16171471	A/turkey/Minnesota/22-013084-001/2022	National Veterinary Services Laboratories - USDA	National Veterinary Services Laboratories - USDA	Chinh,Thanh;Love, Emily;Franzen,Kerrie;Killian,Mary;Koster,Leo;Lantz,Kristina;Stuber,Tod;Hicks,Jessica
EPI2246392	HA	United States	2022-Apr-28	EPI_ISL_16171469	A/peacock/Wisconsin/22-013061-004/2022	National Veterinary Services Laboratories - USDA	National Veterinary Services Laboratories - USDA	Chinh,Thanh;Love, Emily;Franzen,Kerrie;Killian,Mary;Koster,Leo;Lantz,Kristina;Stuber,Tod;Hicks,Jessica
EPI2246376	HA	United States	2022-Apr-28	EPI_ISL_16171467	A/chicken/Colorado/22-013057-001/2022	National Veterinary Services Laboratories - USDA	National Veterinary Services Laboratories - USDA	Chinh,Thanh;Love, Emily;Franzen,Kerrie;Killian,Mary;Koster,Leo;Lantz,Kristina;Stuber,Tod;Hicks,Jessica
EPI2246368	HA	United States	2022-Apr-28	EPI_ISL_16171466	A/chicken/Montana/22-013056-002/2022	National Veterinary Services Laboratories - USDA	National Veterinary Services Laboratories - USDA	Chinh,Thanh;Love, Emily;Franzen,Kerrie;Killian,Mary;Koster,Leo;Lantz,Kristina;Stuber,Tod;Hicks,Jessica
EPI2246360	HA	United States	2022-Apr-27	EPI_ISL_16171465	A/duck/Montana/22-013055-006/2022	National Veterinary Services Laboratories - USDA	National Veterinary Services Laboratories - USDA	Chinh,Thanh;Love, Emily;Franzen,Kerrie;Killian,Mary;Koster,Leo;Lantz,Kristina;Stuber,Tod;Hicks,Jessica
EPI2246352	HA	United States	2022-Apr-27	EPI_ISL_16171464	A/duck/Montana/22-013055-005/2022	National Veterinary Services Laboratories - USDA	National Veterinary Services Laboratories - USDA	Chinh,Thanh;Love, Emily;Franzen,Kerrie;Killian,Mary;Koster,Leo;Lantz,Kristina;Stuber,Tod;Hicks,Jessica
EPI2246344	HA	United States	2022-Apr-28	EPI_ISL_16171463	A/chicken/Montana/22-013053-002/2022	National Veterinary Services Laboratories - USDA	National Veterinary Services Laboratories - USDA	Chinh,Thanh;Love, Emily;Franzen,Kerrie;Killian,Mary;Koster,Leo;Lantz,Kristina;Stuber,Tod;Hicks,Jessica
EPI2246336	HA	United States	2022-Apr-28	EPI_ISL_16171462	A/chicken/Montana/22-013053-001/2022	National Veterinary Services Laboratories - USDA	National Veterinary Services Laboratories - USDA	Chinh,Thanh;Love, Emily;Franzen,Kerrie;Killian,Mary;Koster,Leo;Lantz,Kristina;Stuber,Tod;Hicks,Jessica
EPI2246328	HA	United States	2022-Apr-26	EPI_ISL_16171461	A/chicken/Michigan/22-012977-001/2022	National Veterinary Services Laboratories - USDA	National Veterinary Services Laboratories - USDA	Chinh,Thanh;Love, Emily;Franzen,Kerrie;Killian,Mary;Koster,Leo;Lantz,Kristina;Stuber,Tod;Hicks,Jessica
EPI2246320	HA	United States	2022-Apr-26	EPI_ISL_16171460	A/turkey/Wisconsin/22-012974-002/2022	National Veterinary Services Laboratories - USDA	National Veterinary Services Laboratories - USDA	Chinh,Thanh;Love, Emily;Franzen,Kerrie;Killian,Mary;Koster,Leo;Lantz,Kristina;Stuber,Tod;Hicks,Jessica
EPI2246312	HA	United States	2022-Apr-26	EPI_ISL_16171459	A/turkey/Wisconsin/22-012974-001/2022	National Veterinary Services Laboratories - USDA	National Veterinary Services Laboratories - USDA	Chinh,Thanh;Love, Emily;Franzen,Kerrie;Killian,Mary;Koster,Leo;Lantz,Kristina;Stuber,Tod;Hicks,Jessica
EPI2246304	HA	United States	2022-Apr-25	EPI_ISL_16171458	A/turkey/Wisconsin/22-012973-001/2022	National Veterinary Services Laboratories - USDA	National Veterinary Services Laboratories - USDA	Chinh,Thanh;Love, Emily;Franzen,Kerrie;Killian,Mary;Koster,Leo;Lantz,Kristina;Stuber,Tod;Hicks,Jessica
EPI2246296	HA	United States	2022-Apr-26	EPI_ISL_16171457	A/chicken/Minnesota/22-012966-001/2022	National Veterinary Services Laboratories - USDA	National Veterinary Services Laboratories - USDA	Chinh,Thanh;Love, Emily;Franzen,Kerrie;Killian,Mary;Koster,Leo;Lantz,Kristina;Stuber,Tod;Hicks,Jessica
EPI2246288	HA	United States	2022-Apr-23	EPI_ISL_16171456	A/chicken/Indiana/22-012933-001/2022	National Veterinary Services Laboratories - USDA	National Veterinary Services Laboratories - USDA	Chinh,Thanh;Love, Emily;Franzen,Kerrie;Killian,Mary;Koster,Leo;Lantz,Kristina;Stuber,Tod;Hicks,Jessica
EPI2246280	HA	United States	2022-Apr-26	EPI_ISL_16171455	A/chicken/Minnesota/22-012932-002/2022	National Veterinary Services Laboratories - USDA	National Veterinary Services Laboratories - USDA	Chinh,Thanh;Love, Emily;Franzen,Kerrie;Killian,Mary;Koster,Leo;Lantz,Kristina;Stuber,Tod;Hicks,Jessica
EPI2246272	HA	United States	2022-Apr-26	EPI_ISL_16171454	A/chicken/Minnesota/22-012932-001/2022	National Veterinary Services Laboratories - USDA	National Veterinary Services Laboratories - USDA	Chinh,Thanh;Love, Emily;Franzen,Kerrie;Killian,Mary;Koster,Leo;Lantz,Kristina;Stuber,Tod;Hicks,Jessica
EPI2246264	HA	United States	2022-Apr-25	EPI_ISL_16171453	A/domestic duck/Michigan/22-012855-005/2022	National Veterinary Services Laboratories - USDA	National Veterinary Services Laboratories - USDA	Chinh,Thanh;Love, Emily;Franzen,Kerrie;Killian,Mary;Koster,Leo;Lantz,Kristina;Stuber,Tod;Hicks,Jessica
EPI2246256	HA	United States	2022-Apr-25	EPI_ISL_16171452	A/domestic goose/Michigan/22-012855-004/2022	National Veterinary Services Laboratories - USDA	National Veterinary Services Laboratories - USDA	Chinh,Thanh;Love, Emily;Franzen,Kerrie;Killian,Mary;Koster,Leo;Lantz,Kristina;Stuber,Tod;Hicks,Jessica
EPI2246248	HA	United States	2022-Apr-25	EPI_ISL_16171451	A/turkey/Michigan/22-012855-003/2022	National Veterinary Services Laboratories - USDA	National Veterinary Services Laboratories - USDA	Chinh,Thanh;Love, Emily;Franzen,Kerrie;Killian,Mary;Koster,Leo;Lantz,Kristina;Stuber,Tod;Hicks,Jessica
EPI2246240	HA	United States	2022-Apr-25	EPI_ISL_16171450	A/guinea fowl/Michigan/22-012855-002/2022	National Veterinary Services Laboratories - USDA	National Veterinary Services Laboratories - USDA	Chinh,Thanh;Love, Emily;Franzen,Kerrie;Killian,Mary;Koster,Leo;Lantz,Kristina;Stuber,Tod;Hicks,Jessica
EPI2246232	HA	United States	2022-Apr-25	EPI_ISL_16171449	A/chicken/Michigan/22-012855-001/2022	National Veterinary Services Laboratories - USDA	National Veterinary Services Laboratories - USDA	Chinh,Thanh;Love, Emily;Franzen,Kerrie;Killian,Mary;Koster,Leo;Lantz,Kristina;Stuber,Tod;Hicks,Jessica
EPI2246224	HA	United States	2022-Apr-26	EPI_ISL_16171419	A/chicken/Nebraska/22-012756-001/2022	National Veterinary Services Laboratories - USDA	National Veterinary Services Laboratories - USDA	Chinh,Thanh;Love, Emily;Franzen,Kerrie;Killian,Mary;Koster,Leo;Lantz,Kristina;Stuber,Tod;Hicks,Jessica
EPI2246216	HA	United States	2022-Apr-26	EPI_ISL_16171418	A/chicken/Pennsylvania/22-012742-002/2022	National Veterinary Services Laboratories - USDA	National Veterinary Services Laboratories - USDA	Chinh,Thanh;Love, Emily;Franzen,Kerrie;Killian,Mary;Koster,Leo;Lantz,Kristina;Stuber,Tod;Hicks,Jessica
EPI2246208	HA	United States	2022-Apr-26	EPI_ISL_16171417	A/chicken/Pennsylvania/22-012742-001/2022	National Veterinary Services Laboratories - USDA	National Veterinary Services Laboratories - USDA	Chinh,Thanh;Love, Emily;Franzen,Kerrie;Killian,Mary;Koster,Leo;Lantz,Kristina;Stuber,Tod;Hicks,Jessica
EPI2246200	HA	United States	2022-Apr-26	EPI_ISL_16171416	A/chicken/Kansas/22-012741-003/2022	National Veterinary Services Laboratories - USDA	National Veterinary Services Laboratories - USDA	Chinh,Thanh;Love, Emily;Franzen,Kerrie;Killian,Mary;Koster,Leo;Lantz,Kristina;Stuber,Tod;Hicks,Jessica
EPI2246192	HA	United States	2022-Apr-25	EPI_ISL_16171415	A/chicken/Pennsylvania/22-012578-004/2022	National Veterinary Services Laboratories - USDA	National Veterinary Services Laboratories - USDA	Chinh,Thanh;Love, Emily;Franzen,Kerrie;Killian,Mary;Koster,Leo;Lantz,Kristina;Stuber,Tod;Hicks,Jessica
EPI2246176	HA	United States	2022-Apr-22	EPI_ISL_16171413	A/chicken/Montana/22-012540-002/2022	National Veterinary Services Laboratories - USDA	National Veterinary Services Laboratories - USDA	Chinh,Thanh;Love, Emily;Franzen,Kerrie;Killian,Mary;Koster,Leo;Lantz,Kristina;Stuber,Tod;Hicks,Jessica
EPI2246168	HA	United States	2022-Apr-22	EPI_ISL_16171412	A/chicken/Montana/22-012540-001/2022	National Veterinary Services Laboratories - USDA	National Veterinary Services Laboratories - USDA	Chinh,Thanh;Love, Emily;Franzen,Kerrie;Killian,Mary;Koster,Leo;Lantz,Kristina;Stuber,Tod;Hicks,Jessica
EPI2246160	HA	United States	2022-Apr-25	EPI_ISL_16171411	A/chicken/North Dakota/22-012538-002/2022	National Veterinary Services Laboratories - USDA	National Veterinary Services Laboratories - USDA	Chinh,Thanh;Love, Emily;Franzen,Kerrie;Killian,Mary;Koster,Leo;Lantz,Kristina;Stuber,Tod;Hicks,Jessica
EPI2246152	HA	United States	2022-Apr-25	EPI_ISL_16171409	A/chicken/North Dakota/22-012538-001/2022	National Veterinary Services Laboratories - USDA	National Veterinary Services Laboratories - USDA	Chinh,Thanh;Love, Emily;Franzen,Kerrie;Killian,Mary;Koster,Leo;Lantz,Kristina;Stuber,Tod;Hicks,Jessica
EPI2246144	HA	United States	2022-Apr-25	EPI_ISL_16171408	A/chicken/Iowa/22-012510-002/2022	National Veterinary Services Laboratories - USDA	National Veterinary Services Laboratories - USDA	Chinh,Thanh;Love, Emily;Franzen,Kerrie;Killian,Mary;Koster,Leo;Lantz,Kristina;Stuber,Tod;Hicks,Jessica
EPI2246136	HA	United States	2022-Apr-22	EPI_ISL_16171407	A/domestic goose/Michigan/22-012454-002/2022	National Veterinary Services Laboratories - USDA	National Veterinary Services Laboratories - USDA	Chinh,Thanh;Love, Emily;Franzen,Kerrie;Killian,Mary;Koster,Leo;Lantz,Kristina;Stuber,Tod;Hicks,Jessica
EPI2246128	HA	United States	2022-Apr-22	EPI_ISL_16171406	A/domestic duck/Michigan/22-012454-001/2022	National Veterinary Services Laboratories - USDA	National Veterinary Services Laboratories - USDA	Chinh,Thanh;Love, Emily;Franzen,Kerrie;Killian,Mary;Koster,Leo;Lantz,Kristina;Stuber,Tod;Hicks,Jessica
EPI2246120	HA	United States	2022-Apr-21	EPI_ISL_16171405	A/chicken/Wisconsin/22-012376-003/2022	National Veterinary Services Laboratories - USDA	National Veterinary Services Laboratories - USDA	Chinh,Thanh;Love, Emily;Franzen,Kerrie;Killian,Mary;Koster,Leo;Lantz,Kristina;Stuber,Tod;Hicks,Jessica
EPI2246112	HA	United States	2022-Apr-21	EPI_ISL_16171404	A/duck/Wisconsin/22-012376-002/2022	National Veterinary Services Laboratories - USDA	National Veterinary Services Laboratories - USDA	Chinh,Thanh;Love, Emily;Franzen,Kerrie;Killian,Mary;Koster,Leo;Lantz,Kristina;Stuber,Tod;Hicks,Jessica
EPI2246104	HA	United States	2022-Apr-21	EPI_ISL_16171403	A/chicken/Wisconsin/22-012376-001/2022	National Veterinary Services Laboratories - USDA	National Veterinary Services Laboratories - USDA	Chinh,Thanh;Love, Emily;Franzen,Kerrie;Killian,Mary;Koster,Leo;Lantz,Kristina;Stuber,Tod;Hicks,Jessica
EPI2246096	HA	United States	2022-Apr-21	EPI_ISL_16171402	A/chicken/Utah/22-012375-001/2022	National Veterinary Services Laboratories - USDA	National Veterinary Services Laboratories - USDA	Chinh,Thanh;Love, Emily;Franzen,Kerrie;Killian,Mary;Koster,Leo;Lantz,Kristina;Stuber,Tod;Hicks,Jessica
EPI2246088	HA	United States	2022-Apr-22	EPI_ISL_16171401	A/turkey/Minnesota/22-012374-001/2022	National Veterinary Services Laboratories - USDA	National Veterinary Services Laboratories - USDA	Chinh,Thanh;Love, Emily;Franzen,Kerrie;Killian,Mary;Koster,Leo;Lantz,Kristina;Stuber,Tod;Hicks,Jessica
EPI2246080	HA	United States	2022-Apr-21	EPI_ISL_16171400	A/goose/Minnesota/22-012373-002/2022	National Veterinary Services Laboratories - USDA	National Veterinary Services Laboratories - USDA	Chinh,Thanh;Love, Emily;Franzen,Kerrie;Killian,Mary;Koster,Leo;Lantz,Kristina;Stuber,Tod;Hicks,Jessica
EPI2246072	HA	United States	2022-Apr-21	EPI_ISL_16171399	A/chicken/Minnesota/22-012373-001/2022	National Veterinary Services Laboratories - USDA	National Veterinary Services Laboratories - USDA	Chinh,Thanh;Love, Emily;Franzen,Kerrie;Killian,Mary;Koster,Leo;Lantz,Kristina;Stuber,Tod;Hicks,Jessica
EPI2246064	HA	United States	2022-Apr-19	EPI_ISL_16171332	A/chicken/Colorado/22-012308-002/2022	National Veterinary Services Laboratories - USDA	National Veterinary Services Laboratories - USDA	Chinh,Thanh;Love, Emily;Franzen,Kerrie;Killian,Mary;Koster,Leo;Lantz,Kristina;Stuber,Tod;Hicks,Jessica
EPI2246056	HA	United States	2022-Apr-19	EPI_ISL_16171331	A/chicken/Colorado/22-012308-001/2022	National Veterinary Services Laboratories - USDA	National Veterinary Services Laboratories - USDA	Chinh,Thanh;Love, Emily;Franzen,Kerrie;Killian,Mary;Koster,Leo;Lantz,Kristina;Stuber,Tod;Hicks,Jessica
EPI2246048	HA	United States	2022-Apr-20	EPI_ISL_16171330	A/turkey/Minnesota/22-012287-001/2022	National Veterinary Services Laboratories - USDA	National Veterinary Services Laboratories - USDA	Chinh,Thanh;Love, Emily;Franzen,Kerrie;Killian,Mary;Koster,Leo;Lantz,Kristina;Stuber,Tod;Hicks,Jessica
EPI2246040	HA	United States	2022-Apr-20	EPI_ISL_16171329	A/turkey/Minnesota/22-012286-002/2022	National Veterinary Services Laboratories - USDA	National Veterinary Services Laboratories - USDA	Chinh,Thanh;Love, Emily;Franzen,Kerrie;Killian,Mary;Koster,Leo;Lantz,Kristina;Stuber,Tod;Hicks,Jessica
EPI2246032	HA	United States	2022-Apr-20	EPI_ISL_16171328	A/turkey/Minnesota/22-012286-001/2022	National Veterinary Services Laboratories - USDA	National Veterinary Services Laboratories - USDA	Chinh,Thanh;Love, Emily;Franzen,Kerrie;Killian,Mary;Koster,Leo;Lantz,Kristina;Stuber,Tod;Hicks,Jessica
EPI2246024	HA	United States	2022-Apr-20	EPI_ISL_16171327	A/turkey/Minnesota/22-012285-002/2022	National Veterinary Services Laboratories - USDA	National Veterinary Services Laboratories - USDA	Chinh,Thanh;Love, Emily;Franzen,Kerrie;Killian,Mary;Koster,Leo;Lantz,Kristina;Stuber,Tod;Hicks,Jessica
EPI2246016	HA	United States	2022-Apr-20	EPI_ISL_16171326	A/turkey/Minnesota/22-012285-001/2022	National Veterinary Services Laboratories - USDA	National Veterinary Services Laboratories - USDA	Chinh,Thanh;Love, Emily;Franzen,Kerrie;Killian,Mary;Koster,Leo;Lantz,Kristina;Stuber,Tod;Hicks,Jessica
EPI2246008	HA	United States	2022-Apr-19	EPI_ISL_16171325	A/chicken/Pennsylvania/22-012248-003/2022	National Veterinary Services Laboratories - USDA	National Veterinary Services Laboratories - USDA	Chinh,Thanh;Love, Emily;Franzen,Kerrie;Killian,Mary;Koster,Leo;Lantz,Kristina;Stuber,Tod;Hicks,Jessica
EPI2246000	HA	United States	2022-Apr-19	EPI_ISL_16171324	A/chicken/Pennsylvania/22-012248-001/2022	National Veterinary Services Laboratories - USDA	National Veterinary Services Laboratories - USDA	Chinh,Thanh;Love, Emily;Franzen,Kerrie;Killian,Mary;Koster,Leo;Lantz,Kristina;Stuber,Tod;Hicks,Jessica
EPI2245992	HA	United States	2022-Apr-19	EPI_ISL_16171323	A/turkey/Minnesota/22-012126-003/2022	National Veterinary Services Laboratories - USDA	National Veterinary Services Laboratories - USDA	Chinh,Thanh;Love, Emily;Franzen,Kerrie;Killian,Mary;Koster,Leo;Lantz,Kristina;Stuber,Tod;Hicks,Jessica
EPI2245984	HA	United States	2022-Apr-19	EPI_ISL_16171322	A/turkey/Minnesota/22-012126-002/2022	National Veterinary Services Laboratories - USDA	National Veterinary Services Laboratories - USDA	Chinh,Thanh;Love, Emily;Franzen,Kerrie;Killian,Mary;Koster,Leo;Lantz,Kristina;Stuber,Tod;Hicks,Jessica
EPI2245976	HA	United States	2022-Apr-19	EPI_ISL_16171256	A/turkey/Minnesota/22-012125-002/2022	National Veterinary Services Laboratories - USDA	National Veterinary Services Laboratories - USDA	Chinh,Thanh;Love, Emily;Franzen,Kerrie;Killian,Mary;Koster,Leo;Lantz,Kristina;Stuber,Tod;Hicks,Jessica
EPI2245968	HA	United States	2022-Apr-19	EPI_ISL_16171255	A/turkey/Minnesota/22-012125-001/2022	National Veterinary Services Laboratories - USDA	National Veterinary Services Laboratories - USDA	Chinh,Thanh;Love, Emily;Franzen,Kerrie;Killian,Mary;Koster,Leo;Lantz,Kristina;Stuber,Tod;Hicks,Jessica
EPI2245960	HA	United States	2022-Apr-19	EPI_ISL_16171254	A/turkey/Minnesota/22-012123-001/2022	National Veterinary Services Laboratories - USDA	National Veterinary Services Laboratories - USDA	Chinh,Thanh;Love, Emily;Franzen,Kerrie;Killian,Mary;Koster,Leo;Lantz,Kristina;Stuber,Tod;Hicks,Jessica
EPI2245952	HA	United States	2022-Apr-19	EPI_ISL_16171252	A/chicken/North Dakota/22-012100-001/2022	National Veterinary Services Laboratories - USDA	National Veterinary Services Laboratories - USDA	Chinh,Thanh;Love, Emily;Franzen,Kerrie;Killian,Mary;Koster,Leo;Lantz,Kristina;Stuber,Tod;Hicks,Jessica
EPI2245944	HA	United States	2022-Apr-19	EPI_ISL_16171251	A/turkey/North Dakota/22-012099-002/2022	National Veterinary Services Laboratories - USDA	National Veterinary Services Laboratories - USDA	Chinh,Thanh;Love, Emily;Franzen,Kerrie;Killian,Mary;Koster,Leo;Lantz,Kristina;Stuber,Tod;Hicks,Jessica
EPI2245936	HA	United States	2022-Apr-19	EPI_ISL_16171250	A/turkey/North Dakota/22-012099-001/2022	National Veterinary Services Laboratories - USDA	National Veterinary Services Laboratories - USDA	Chinh,Thanh;Love, Emily;Franzen,Kerrie;Killian,Mary;Koster,Leo;Lantz,Kristina;Stuber,Tod;Hicks,Jessica
EPI2245928	HA	United States	2022-Apr-19	EPI_ISL_16171249	A/chicken/Pennsylvania/22-012092-005/2022	National Veterinary Services Laboratories - USDA	National Veterinary Services Laboratories - USDA	Chinh,Thanh;Love, Emily;Franzen,Kerrie;Killian,Mary;Koster,Leo;Lantz,Kristina;Stuber,Tod;Hicks,Jessica
EPI2245920	HA	United States	2022-Apr-19	EPI_ISL_16171248	A/chicken/Pennsylvania/22-012092-003/2022	National Veterinary Services Laboratories - USDA	National Veterinary Services Laboratories - USDA	Chinh,Thanh;Love, Emily;Franzen,Kerrie;Killian,Mary;Koster,Leo;Lantz,Kristina;Stuber,Tod;Hicks,Jessica
EPI2245912	HA	United States	2022-Apr-19	EPI_ISL_16171247	A/chicken/Pennsylvania/22-012091-001/2022	National Veterinary Services Laboratories - USDA	National Veterinary Services Laboratories - USDA	Chinh,Thanh;Love, Emily;Franzen,Kerrie;Killian,Mary;Koster,Leo;Lantz,Kristina;Stuber,Tod;Hicks,Jessica
EPI2240742	HA	Netherlands	2022-Nov-17	EPI_ISL_16056572	A/Mallard Duck/Netherlands/29/2022	Erasmus Medical Center	Erasmus Medical Center
EPI2240734	HA	Netherlands	2022-Nov-09	EPI_ISL_16056571	A/Mallard Duck/Netherlands/28/2022	Erasmus Medical Center	Erasmus Medical Center
EPI2240726	HA	Netherlands	2022-Nov-08	EPI_ISL_16056570	A/Mallard Duck/Netherlands/27/2022	Erasmus Medical Center	Erasmus Medical Center
EPI2240718	HA	Netherlands	2022-Nov-15	EPI_ISL_16056569	A/Gadwall/Netherlands/3/2022	Erasmus Medical Center	Erasmus Medical Center
EPI2240710	HA	Netherlands	2022-Nov-04	EPI_ISL_16056568	A/Eurasian Wigeon/Netherlands/5/2022	Erasmus Medical Center	Erasmus Medical Center
EPI2223319	HA	Netherlands	2022-Nov-11	EPI_ISL_15925885	A/Black-headed Gull/Netherlands/11/2022	Erasmus Medical Center	Erasmus Medical Center
EPI2223311	HA	Netherlands	2022-Nov-11	EPI_ISL_15925884	A/Great Cormorant/Netherlands/1/2022	Erasmus Medical Center	Erasmus Medical Center
EPI2223303	HA	Netherlands	2022-Nov-01	EPI_ISL_15925883	A/Eurasian Wigeon/Netherlands/4/2022	Erasmus Medical Center	Erasmus Medical Center
EPI2223295	HA	Netherlands	2022-Oct-21	EPI_ISL_15925882	A/Eurasian Wigeon/Netherlands/3/2022	Erasmus Medical Center	Erasmus Medical Center
EPI2223287	HA	Netherlands	2022-Nov-09	EPI_ISL_15925881	A/Gadwall/Netherlands/2/2022	Erasmus Medical Center	Erasmus Medical Center
EPI2223279	HA	Netherlands	2022-Nov-09	EPI_ISL_15925880	A/Gadwall/Netherlands/1/2022	Erasmus Medical Center	Erasmus Medical Center
EPI2223264	HA	Netherlands	2022-Nov-01	EPI_ISL_15925878	A/Common Teal/Netherlands/5/2022	Erasmus Medical Center	Erasmus Medical Center
EPI2223249	HA	Netherlands	2022-Oct-29	EPI_ISL_15925876	A/Eurasian Wigeon/Netherlands/2/2022	Erasmus Medical Center	Erasmus Medical Center
EPI2223241	HA	Netherlands	2022-Oct-29	EPI_ISL_15925875	A/Eurasian Wigeon/Netherlands/1/2022	Erasmus Medical Center	Erasmus Medical Center
EPI2198078	HA	Netherlands	2022-Oct-13	EPI_ISL_15581792	A/Mallard/Netherlands/22/2022	Erasmus Medical Center	Erasmus Medical Center
EPI2198056	HA	Netherlands	2022-Oct-12	EPI_ISL_15581789	A/Mallard/Netherlands/19/2022	Erasmus Medical Center	Erasmus Medical Center
EPI2133494	HA	Japan	2022-Feb-08	EPI_ISL_14615036	A/crow/Hokkaido/0101Q056/2022	Graduate School of Veterinary Medicine, Hokkaido University	Graduate School of Veterinary Medicine, Hokkaido University	Yoshihiro, SAKODA; Norikazu, ISODA; Takahiro, HIONO
EPI2133486	HA	Japan	2022-Mar-14	EPI_ISL_14615027	A/crow/Hokkaido/0103L018/2022	Graduate School of Veterinary Medicine, Hokkaido University	Graduate School of Veterinary Medicine, Hokkaido University
EPI2133478	HA	Japan	2022-Mar-02	EPI_ISL_14615026	A/crow/Hokkaido/0102L015/2022	Graduate School of Veterinary Medicine, Hokkaido University	Graduate School of Veterinary Medicine, Hokkaido University	Yoshihiro, SAKODA; Norikazu, ISODA; Takahiro, HIONO
EPI2050822	HA	Luxembourg	2022-Feb-04	EPI_ISL_13026246	A/Barnacle goose/Luxembourg/22033922/2022	Laboratoire de Médecine vétérinaire de l'Etat	Luxembourg Institute of Health	Aurélie Sausy, Chantal Snoeck
EPI2050814	HA	Luxembourg	2022-Jan-17	EPI_ISL_13026245	A/Canada goose/Luxembourg/22012198/2022	Laboratoire de Médecine vétérinaire de l'Etat	Luxembourg Institute of Health	Aurélie Sausy, Chantal Snoeck
EPI2050799	HA	Luxembourg	2021-Dec-14	EPI_ISL_13026237	A/Great cormorant/Luxembourg/21243185/2021	Laboratoire de Médecine vétérinaire de l'Etat	Luxembourg Institute of Health	Aurélie Sausy, Chantal Snoeck
EPI2050784	HA	Luxembourg	2021-Dec-14	EPI_ISL_13026236	A/Grey heron/Luxembourg/21243177/2021	Laboratoire de Médecine vétérinaire de l'Etat	Luxembourg Institute of Health	Aurélie Sausy, Chantal Snoeck
EPI2050776	HA	Luxembourg	2021-Dec-10	EPI_ISL_13026106	A/Canada goose/Luxembourg/21239614/2021	Laboratoire de Médecine vétérinaire de l'Etat	Luxembourg Institute of Health	Aurélie Sausy, Chantal Snoeck
EPI2050768	HA	Luxembourg	2021-Dec-09	EPI_ISL_13026105	A/Canada goose/Luxembourg/21237199/2021	Laboratoire de Médecine vétérinaire de l'Etat	Luxembourg Institute of Health	Aurélie Sausy, Chantal Snoeck
EPI2050760	HA	Luxembourg	2021-Nov-24	EPI_ISL_13026104	A/Canada goose/Luxembourg/21217776/2021	Laboratoire de Médecine vétérinaire de l'Etat	Luxembourg Institute of Health	Aurélie Sausy, Chantal Snoeck
EPI2050752	HA	Luxembourg	2021-Nov-24	EPI_ISL_13026099	A/Greylag goose/Luxembourg/21217773/2021	Laboratoire de Médecine vétérinaire de l'Etat	Luxembourg Institute of Health	Aurélie Sausy, Chantal Snoeck
EPI2050405	HA	United States	2022-Mar-26	EPI_ISL_13009689	A/chicken/Wyoming/22-009599-001/2022	National Veterinary Services Laboratories - USDA	National Veterinary Services Laboratories - USDA	Chinh,Thanh;Franzen,Kerrie;Love, Emily;Killian,Mary;Koster,Leo;Lantz,Kristina;Stuber,Tod;Hicks,Jessica
EPI2050397	HA	United States	2022-Mar-27	EPI_ISL_13009677	A/turkey/North Carolina/22-009583-002/2022	National Veterinary Services Laboratories - USDA	National Veterinary Services Laboratories - USDA	Chinh,Thanh;Franzen,Kerrie;Love, Emily;Killian,Mary;Koster,Leo;Lantz,Kristina;Stuber,Tod;Hicks,Jessica
EPI2050389	HA	United States	2022-Mar-27	EPI_ISL_13009673	A/turkey/North Carolina/22-009583-001/2022	National Veterinary Services Laboratories - USDA	National Veterinary Services Laboratories - USDA	Chinh,Thanh;Franzen,Kerrie;Love, Emily;Killian,Mary;Koster,Leo;Lantz,Kristina;Stuber,Tod;Hicks,Jessica
EPI2050381	HA	United States	2022-Mar-29	EPI_ISL_13009658	A/turkey/Iowa/22-009550-001/2022	National Veterinary Services Laboratories - USDA	National Veterinary Services Laboratories - USDA	Chinh,Thanh;Franzen,Kerrie;Love, Emily;Killian,Mary;Koster,Leo;Lantz,Kristina;Stuber,Tod;Hicks,Jessica
EPI2050373	HA	United States	2022-Mar-29	EPI_ISL_13009652	A/turkey/South Dakota/22-009534-001/2022	National Veterinary Services Laboratories - USDA	National Veterinary Services Laboratories - USDA	Chinh,Thanh;Franzen,Kerrie;Love, Emily;Killian,Mary;Koster,Leo;Lantz,Kristina;Stuber,Tod;Hicks,Jessica
EPI2050365	HA	United States	2022-Mar-26	EPI_ISL_13009636	A/chicken/Ohio/22-009419-001/2022	National Veterinary Services Laboratories - USDA	National Veterinary Services Laboratories - USDA	Chinh,Thanh;Franzen,Kerrie;Love, Emily;Killian,Mary;Koster,Leo;Lantz,Kristina;Stuber,Tod;Hicks,Jessica
EPI2050357	HA	United States	2022-Mar-25	EPI_ISL_13009634	A/guinea fowl/Maine/22-009412-002/2022	National Veterinary Services Laboratories - USDA	National Veterinary Services Laboratories - USDA	Chinh,Thanh;Franzen,Kerrie;Love, Emily;Killian,Mary;Koster,Leo;Lantz,Kristina;Stuber,Tod;Hicks,Jessica
EPI2050349	HA	United States	2022-Mar-25	EPI_ISL_13009620	A/chicken/Maine/22-009412-001/2022	National Veterinary Services Laboratories - USDA	National Veterinary Services Laboratories - USDA	Chinh,Thanh;Franzen,Kerrie;Love, Emily;Killian,Mary;Koster,Leo;Lantz,Kristina;Stuber,Tod;Hicks,Jessica
EPI2050341	HA	United States	2022-Mar-25	EPI_ISL_13009618	A/Sebastopol goose/Massachusetts/22-009371-001/2022	National Veterinary Services Laboratories - USDA	National Veterinary Services Laboratories - USDA	Chinh,Thanh;Franzen,Kerrie;Love, Emily;Killian,Mary;Koster,Leo;Lantz,Kristina;Stuber,Tod;Hicks,Jessica
EPI2029366	HA	United States	2022-Mar-24	EPI_ISL_12567533	A/chicken/Nebraska/22-009190-002/2022	National Veterinary Services Laboratories - USDA	National Veterinary Services Laboratories - USDA	Chinh,Thanh;Love, Emily;Franzen,Kerrie;Killian,Mary;Koster,Leo;Lantz,Kristina;Stuber,Tod;Hicks,Jessica
EPI2029358	HA	United States	2022-Mar-24	EPI_ISL_12567532	A/domestic duck/Nebraska/22-009190-001/2022	National Veterinary Services Laboratories - USDA	National Veterinary Services Laboratories - USDA	Chinh,Thanh;Love, Emily;Franzen,Kerrie;Killian,Mary;Koster,Leo;Lantz,Kristina;Stuber,Tod;Hicks,Jessica
EPI2029350	HA	United States	2022-Mar-25	EPI_ISL_12567531	A/turkey/Minnesota/22-009182-003/2022	National Veterinary Services Laboratories - USDA	National Veterinary Services Laboratories - USDA	Chinh,Thanh;Love, Emily;Franzen,Kerrie;Killian,Mary;Koster,Leo;Lantz,Kristina;Stuber,Tod;Hicks,Jessica
EPI2029342	HA	United States	2022-Mar-25	EPI_ISL_12567530	A/turkey/Minnesota/22-009182-001/2022	National Veterinary Services Laboratories - USDA	National Veterinary Services Laboratories - USDA	Chinh,Thanh;Love, Emily;Franzen,Kerrie;Killian,Mary;Koster,Leo;Lantz,Kristina;Stuber,Tod;Hicks,Jessica
EPI2029334	HA	United States	2022-Mar-25	EPI_ISL_12567529	A/Embden goose/Minnesota/22-009181-003/2022	National Veterinary Services Laboratories - USDA	National Veterinary Services Laboratories - USDA	Chinh,Thanh;Love, Emily;Franzen,Kerrie;Killian,Mary;Koster,Leo;Lantz,Kristina;Stuber,Tod;Hicks,Jessica
EPI2029326	HA	United States	2022-Mar-25	EPI_ISL_12567393	A/chicken/Minnesota/22-009181-001/2022	National Veterinary Services Laboratories - USDA	National Veterinary Services Laboratories - USDA	Chinh,Thanh;Love, Emily;Franzen,Kerrie;Killian,Mary;Koster,Leo;Lantz,Kristina;Stuber,Tod;Hicks,Jessica
EPI2029318	HA	United States	2022-Mar-25	EPI_ISL_12567392	A/chicken/Iowa/22-009180-002/2022	National Veterinary Services Laboratories - USDA	National Veterinary Services Laboratories - USDA	Chinh,Thanh;Love, Emily;Franzen,Kerrie;Killian,Mary;Koster,Leo;Lantz,Kristina;Stuber,Tod;Hicks,Jessica
EPI2029310	HA	United States	2022-Mar-25	EPI_ISL_12567391	A/chicken/Iowa/22-009180-001/2022	National Veterinary Services Laboratories - USDA	National Veterinary Services Laboratories - USDA	Chinh,Thanh;Love, Emily;Franzen,Kerrie;Killian,Mary;Koster,Leo;Lantz,Kristina;Stuber,Tod;Hicks,Jessica
EPI2029302	HA	United States	2022-Mar-17	EPI_ISL_12567390	A/chicken/Maryland/22-008243-001/2022	National Veterinary Services Laboratories - USDA	National Veterinary Services Laboratories - USDA	Chinh,Thanh;Love, Emily;Franzen,Kerrie;Killian,Mary;Koster,Leo;Lantz,Kristina;Stuber,Tod;Hicks,Jessica
EPI2024067	HA	Czech Republic	2021-Dec-18	EPI_ISL_12223734	A/grey heron/Czech Republic/25338-2/2021	State Veterinary Institute Prague	State Veterinary Institute Prague	Alexander,Nagy;Martina,Stara;Lenka,Cernikova
EPI2024059	HA	Czech Republic	2021-Dec-18	EPI_ISL_12223688	A/grey heron/Czech Republic/25338-1/2021	State Veterinary Institute Prague	State Veterinary Institute Prague	Alexander,Nagy;Martina,Stara;Lenka,Cernikova
EPI1985970	HA	United States	2022-Jan-08	EPI_ISL_9880153	A/American wigeon/North Carolina/AH0182954/2022	USDA-NWRC Wildlife Services	National Veterinary Services Laboratories - USDA	Chinh,Thanh;Love, Emily;Franzen,Kerrie;Killian,Mary;Koster,Leo;Bevins,Sarah;Dilione,Krista;Lenoch,Julianna;Linder,Timothy
EPI1985962	HA	United States	2022-Jan-08	EPI_ISL_9880152	A/northern shoveler/North Carolina/AH0182913/2022	USDA-NWRC Wildlife Services	National Veterinary Services Laboratories - USDA	Chinh,Thanh;Love, Emily;Franzen,Kerrie;Killian,Mary;Koster,Leo;Bevins,Sarah;Dilione,Krista;Lenoch,Julianna;Linder,Timothy
EPI1985954	HA	United States	2022-Jan-08	EPI_ISL_9880151	A/gadwall/North Carolina/AH0182894/2022	USDA-NWRC Wildlife Services	National Veterinary Services Laboratories - USDA	Chinh,Thanh;Love, Emily;Franzen,Kerrie;Killian,Mary;Koster,Leo;Bevins,Sarah;Dilione,Krista;Lenoch,Julianna;Linder,Timothy
EPI1985946	HA	United States	2022-Jan-08	EPI_ISL_9880021	A/northern pintail/North Carolina/AH0182892/2022	USDA-NWRC Wildlife Services	National Veterinary Services Laboratories - USDA	Chinh,Thanh;Love, Emily;Franzen,Kerrie;Killian,Mary;Koster,Leo;Bevins,Sarah;Dilione,Krista;Lenoch,Julianna;Linder,Timothy
EPI1985938	HA	United States	2022-Jan-08	EPI_ISL_9880019	A/mallard/North Carolina/AH0182886/2022	USDA-NWRC Wildlife Services	National Veterinary Services Laboratories - USDA	Chinh,Thanh;Love, Emily;Franzen,Kerrie;Killian,Mary;Koster,Leo;Bevins,Sarah;Dilione,Krista;Lenoch,Julianna;Linder,Timothy
EPI1985930	HA	United States	2022-Jan-08	EPI_ISL_9880015	A/American wigeon/North Carolina/AH0182517/2022	USDA-NWRC Wildlife Services	National Veterinary Services Laboratories - USDA	Chinh,Thanh;Love, Emily;Franzen,Kerrie;Killian,Mary;Koster,Leo;Bevins,Sarah;Dilione,Krista;Lenoch,Julianna;Linder,Timothy
EPI2987902	HA	Czech Republic	2024-Jan-04	EPI_ISL_18858134	A/chicken/Czech_Republic/611-1/2024	State Veterinary Institute Prague	State Veterinary Institute Prague	Nagy,Alexander;Cernikova,Lenka;Klickova,Eliska;Haban,Lubomir;Sterbova,Michaela;Orenicova,Kristina
EPI2987894	HA	Czech Republic	2024-Jan-04	EPI_ISL_18858133	A/chicken/Czech_Republic/611-4/2024	State Veterinary Institute Prague	State Veterinary Institute Prague	Nagy,Alexander;Cernikova,Lenka;Klickova,Eliska;Haban,Lubomir;Sterbova,Michaela;Orenicova,Kristina
EPI2987886	HA	Czech Republic	2024-Jan-04	EPI_ISL_18858132	A/chicken/Czech_Republic/611-3/2024	State Veterinary Institute Prague	State Veterinary Institute Prague	Nagy,Alexander;Cernikova,Lenka;Klickova,Eliska;Haban,Lubomir;Sterbova,Michaela;Orenicova,Kristina
EPI2987878	HA	Czech Republic	2024-Jan-04	EPI_ISL_18858131	A/chicken/Czech_Republic/611-2/2024	State Veterinary Institute Prague	State Veterinary Institute Prague	Nagy,Alexander;Cernikova,Lenka;Klickova,Eliska;Haban,Lubomir;Sterbova,Michaela;Orenicova,Kristina
EPI2987870	HA	Czech Republic	2024-Jan-04	EPI_ISL_18858130	A/chicken/Czech_Republic/612-3/12024	State Veterinary Institute Prague	State Veterinary Institute Prague	Nagy,Alexander;Cernikova,Lenka;Klickova,Eliska;Haban,Lubomir;Sterbova,Michaela;Orenicova,Kristina
EPI2987862	HA	Czech Republic	2024-Jan-04	EPI_ISL_18858129	A/chicken/Czech_Republic/612-2/12024	State Veterinary Institute Prague	State Veterinary Institute Prague	Nagy,Alexander;Cernikova,Lenka;Klickova,Eliska;Haban,Lubomir;Sterbova,Michaela;Orenicova,Kristina
EPI2987854	HA	Czech Republic	2024-Jan-04	EPI_ISL_18858128	A/chicken/Czech_Republic/612-1/2024	State Veterinary Institute Prague	State Veterinary Institute Prague	Nagy,Alexander;Cernikova,Lenka;Klickova,Eliska;Haban,Lubomir;Sterbova,Michaela;Orenicova,Kristina
EPI2987846	HA	Czech Republic	2024-Jan-04	EPI_ISL_18858127	A/chicken/Czech_Republic/612-4/2024	State Veterinary Institute Prague	State Veterinary Institute Prague	Nagy,Alexander;Cernikova,Lenka;Klickova,Eliska;Haban,Lubomir;Sterbova,Michaela;Orenicova,Kristina
EPI2987838	HA	Czech Republic	2024-Jan-04	EPI_ISL_18858126	A/chicken/Czech_Republic/612-5/2024	State Veterinary Institute Prague	State Veterinary Institute Prague	Nagy,Alexander;Cernikova,Lenka;Klickova,Eliska;Haban,Lubomir;Sterbova,Michaela;Orenicova,Kristina
EPI2987830	HA	Czech Republic	2024-Jan-12	EPI_ISL_18858125	A/chicken/Czech_Republic/861-5/2024	State Veterinary Institute Prague	State Veterinary Institute Prague	Nagy,Alexander;Cernikova,Lenka;Klickova,Eliska;Haban,Lubomir;Sterbova,Michaela;Orenicova,Kristina
EPI2987822	HA	Czech Republic	2024-Jan-12	EPI_ISL_18858124	A/chicken/Czech_Republic/861-1/2024	State Veterinary Institute Prague	State Veterinary Institute Prague	Nagy,Alexander;Cernikova,Lenka;Klickova,Eliska;Haban,Lubomir;Sterbova,Michaela;Orenicova,Kristina
EPI2987814	HA	Czech Republic	2024-Jan-12	EPI_ISL_18858123	A/chicken/Czech_Republic/861-2/2024	State Veterinary Institute Prague	State Veterinary Institute Prague	Nagy,Alexander;Cernikova,Lenka;Klickova,Eliska;Haban,Lubomir;Sterbova,Michaela;Orenicova,Kristina
EPI2987806	HA	Czech Republic	2024-Jan-12	EPI_ISL_18858122	A/chicken/Czech_Republic/861-orig/2024	State Veterinary Institute Prague	State Veterinary Institute Prague	Nagy,Alexander;Cernikova,Lenka;Klickova,Eliska;Haban,Lubomir;Sterbova,Michaela;Orenicova,Kristina
EPI2987798	HA	Czech Republic	2024-Jan-12	EPI_ISL_18858121	A/chicken/Czech_Republic/861-6/2024	State Veterinary Institute Prague	State Veterinary Institute Prague	Nagy,Alexander;Cernikova,Lenka;Klickova,Eliska;Haban,Lubomir;Sterbova,Michaela;Orenicova,Kristina
EPI2987790	HA	Czech Republic	2024-Jan-05	EPI_ISL_18858120	A/chicken/Czech_Republic/397-5/2024	State Veterinary Institute Prague	State Veterinary Institute Prague	Nagy,Alexander;Cernikova,Lenka;Klickova,Eliska;Haban,Lubomir;Sterbova,Michaela;Orenicova,Kristina
EPI2987782	HA	Czech Republic	2024-Jan-05	EPI_ISL_18858119	A/chicken/Czech_Republic/397-4/2024	State Veterinary Institute Prague	State Veterinary Institute Prague	Nagy,Alexander;Cernikova,Lenka;Klickova,Eliska;Haban,Lubomir;Sterbova,Michaela;Orenicova,Kristina
EPI2987774	HA	Czech Republic	2024-Jan-04	EPI_ISL_18858118	A/chicken/Czech_Republic/396-4/2024	State Veterinary Institute Prague	State Veterinary Institute Prague	Nagy,Alexander;Cernikova,Lenka;Klickova,Eliska;Haban,Lubomir;Sterbova,Michaela;Orenicova,Kristina
EPI2987766	HA	Czech Republic	2024-Jan-04	EPI_ISL_18858117	A/chicken/Czech_Republic/396-2/2024	State Veterinary Institute Prague	State Veterinary Institute Prague	Nagy,Alexander;Cernikova,Lenka;Klickova,Eliska;Haban,Lubomir;Sterbova,Michaela;Orenicova,Kristina
EPI2987758	HA	Czech Republic	2024-Jan-04	EPI_ISL_18858116	A/chicken/Czech_Republic/396-5/2024	State Veterinary Institute Prague	State Veterinary Institute Prague	Nagy,Alexander;Cernikova,Lenka;Klickova,Eliska;Haban,Lubomir;Sterbova,Michaela;Orenicova,Kristina
EPI2987750	HA	Czech Republic	2024-Jan-05	EPI_ISL_18858115	A/chicken/Czech_Republic/395-1/2024	State Veterinary Institute Prague	State Veterinary Institute Prague	Nagy,Alexander;Cernikova,Lenka;Klickova,Eliska;Haban,Lubomir;Sterbova,Michaela;Orenicova,Kristina
EPI2987742	HA	Czech Republic	2024-Jan-05	EPI_ISL_18858114	A/chicken/Czech_Republic/395-3/2024	State Veterinary Institute Prague	State Veterinary Institute Prague	Nagy,Alexander;Cernikova,Lenka;Klickova,Eliska;Haban,Lubomir;Sterbova,Michaela;Orenicova,Kristina
EPI2987734	HA	Czech Republic	2024-Jan-04	EPI_ISL_18858113	A/chicken/Czech_Republic/394-3/2024	State Veterinary Institute Prague	State Veterinary Institute Prague	Nagy,Alexander;Cernikova,Lenka;Klickova,Eliska;Haban,Lubomir;Sterbova,Michaela;Orenicova,Kristina
EPI2987726	HA	Czech Republic	2024-Jan-04	EPI_ISL_18858112	A/chicken/Czech_Republic/394-4/2024	State Veterinary Institute Prague	State Veterinary Institute Prague	Nagy,Alexander;Cernikova,Lenka;Klickova,Eliska;Haban,Lubomir;Sterbova,Michaela;Orenicova,Kristina
EPI2987718	HA	Czech Republic	2024-Jan-04	EPI_ISL_18858111	A/chicken/Czech_Republic/394-1/2024	State Veterinary Institute Prague	State Veterinary Institute Prague	Nagy,Alexander;Cernikova,Lenka;Klickova,Eliska;Haban,Lubomir;Sterbova,Michaela;Orenicova,Kristina
EPI2987710	HA	Czech Republic	2024-Jan-04	EPI_ISL_18858110	A/chicken/Czech_Republic/394-2/2024	State Veterinary Institute Prague	State Veterinary Institute Prague	Nagy,Alexander;Cernikova,Lenka;Klickova,Eliska;Haban,Lubomir;Sterbova,Michaela;Orenicova,Kristina
EPI2987702	HA	Czech Republic	2024-Jan-05	EPI_ISL_18858109	A/chicken/Czech_Republic/312-3/2024	State Veterinary Institute Prague	State Veterinary Institute Prague	Nagy,Alexander;Cernikova,Lenka;Klickova,Eliska;Haban,Lubomir;Sterbova,Michaela;Orenicova,Kristina
EPI2987694	HA	Czech Republic	2024-Jan-05	EPI_ISL_18858108	A/chicken/Czech_Republic/312-5/2024	State Veterinary Institute Prague	State Veterinary Institute Prague	Nagy,Alexander;Cernikova,Lenka;Klickova,Eliska;Haban,Lubomir;Sterbova,Michaela;Orenicova,Kristina
EPI2987686	HA	Czech Republic	2024-Jan-05	EPI_ISL_18858107	A/chicken/Czech_Republic/312-5feather/2024	State Veterinary Institute Prague	State Veterinary Institute Prague	Nagy,Alexander;Cernikova,Lenka;Klickova,Eliska;Haban,Lubomir;Sterbova,Michaela;Orenicova,Kristina
EPI2987678	HA	Czech Republic	2024-Jan-05	EPI_ISL_18858106	A/chicken/Czech_Republic/312-3feather/2024	State Veterinary Institute Prague	State Veterinary Institute Prague	Nagy,Alexander;Cernikova,Lenka;Klickova,Eliska;Haban,Lubomir;Sterbova,Michaela;Orenicova,Kristina
EPI2987670	HA	Czech Republic	2024-Jan-05	EPI_ISL_18858105	A/chicken/Czech_Republic/312-2/2024	State Veterinary Institute Prague	State Veterinary Institute Prague	Nagy,Alexander;Cernikova,Lenka;Klickova,Eliska;Haban,Lubomir;Sterbova,Michaela;Orenicova,Kristina
EPI2987662	HA	Czech Republic	2024-Jan-05	EPI_ISL_18858104	A/chicken/Czech_Republic/312-1/2024	State Veterinary Institute Prague	State Veterinary Institute Prague	Nagy,Alexander;Cernikova,Lenka;Klickova,Eliska;Haban,Lubomir;Sterbova,Michaela;Orenicova,Kristina
EPI2987654	HA	Czech Republic	2024-Jan-05	EPI_ISL_18858103	A/chicken/Czech_Republic/312-4/2024	State Veterinary Institute Prague	State Veterinary Institute Prague	Nagy,Alexander;Cernikova,Lenka;Klickova,Eliska;Haban,Lubomir;Sterbova,Michaela;Orenicova,Kristina
EPI2913279	HA	Chile	2023-Feb-04	EPI_ISL_18760074	A/chicken/Atacama/SJCEIRR-2352542/2023	Center of Excellence for Influenza Research and Surveillance	Center of Excellence for Influenza Research and Surveillance	Pardo-Roa,C., Johow,M., Ariyama,N., Almonacid,L.I., Aguayo,C., Castillo,P.N., Munoz,G., Avila,C., Neira,V.; Medina,R.
EPI2913271	HA	Chile	2023-Mar-25	EPI_ISL_18760073	A/chicken/Araucania/SJCEIRR-244469/2023	Center of Excellence for Influenza Research and Surveillance	Center of Excellence for Influenza Research and Surveillance	Pardo-Roa,C., Johow,M., Ariyama,N., Almonacid,L.I., Aguayo,C., Castillo,P.N., Munoz,G., Avila,C., Neira,V.; Medina,R.
EPI2913183	HA	Chile	2023-Mar-20	EPI_ISL_18760060	A/chicken/Metropolitana/SJCEIRR-2431481/2023	Center of Excellence for Influenza Research and Surveillance	Center of Excellence for Influenza Research and Surveillance	Pardo-Roa,C., Johow,M., Ariyama,N., Almonacid,L.I., Aguayo,C., Castillo,P.N., Munoz,G., Avila,C., Neira,V.; Medina,R.
EPI2820741	HA	Italy	2023-Nov-16	EPI_ISL_18612235	A/chicken/Italy/23VIR10336-32/2023	Istituto Zooprofilattico Sperimentale delle Venezie, EU/OIE/Reference Laboratory and FAO Reference Centre for AI and ND	Istituto Zooprofilattico Sperimentale Delle Venezie	Salomoni, A.; Zecchin, B.; Fusaro, A.; Schivo, A.; Salviato, A.; Palumbo, E.; Giussani, E.; Pastori, A.; Savegnago, E.; Monne, I.; Terregino, C.
EPI2559615	HA	Italy	2023-Mar-27	EPI_ISL_17679737	A/chicken/Italy/23VIR2802-7/2023	Istituto Zooprofilattico Sperimentale delle Venezie, EU/OIE/Reference Laboratory and FAO Reference Centre for AI and ND	Istituto Zooprofilattico Sperimentale Delle Venezie	Pastori, A.; Zecchin, B.; Fusaro, A.; Schivo, A.; Salviato, A.; Palumbo, E.; Giussani, E.; Monne, I.; Terregino, C.
EPI2559599	HA	Italy	2023-Mar-30	EPI_ISL_17679735	A/chicken/Italy/23VIR3022-15/2023	Istituto Zooprofilattico Sperimentale delle Venezie, EU/OIE/Reference Laboratory and FAO Reference Centre for AI and ND	Istituto Zooprofilattico Sperimentale Delle Venezie	Pastori, A.; Zecchin, B.; Fusaro, A.; Schivo, A.; Salviato, A.; Palumbo, E.; Giussani, E.; Monne, I.; Terregino, C.
EPI2559591	HA	Italy	2023-Apr-02	EPI_ISL_17679734	A/chicken/Italy/23VIR3021-13/2023	Istituto Zooprofilattico Sperimentale delle Venezie, EU/OIE/Reference Laboratory and FAO Reference Centre for AI and ND	Istituto Zooprofilattico Sperimentale Delle Venezie	Pastori, A.; Zecchin, B.; Fusaro, A.; Schivo, A.; Salviato, A.; Palumbo, E.; Giussani, E.; Monne, I.; Terregino, C.
EPI2509875	HA	United Kingdom	2023-Feb-20	EPI_ISL_17465831	A/chicken/England/029912/2023	Animal and Plant Health Agency (APHA)	Animal and Plant Health Agency (APHA)
EPI2437531	HA	United Kingdom	2023-Feb-01	EPI_ISL_17072780	A/Chicken/Scotland/017391/2023	Animal and Plant Health Agency (APHA)	Animal and Plant Health Agency (APHA)
EPI2437523	HA	United Kingdom	2023-Jan-27	EPI_ISL_17072779	A/Chicken/Scotland/015627/2023	Animal and Plant Health Agency (APHA)	Animal and Plant Health Agency (APHA)
EPI2437350	HA	United Kingdom	2023-Feb-14	EPI_ISL_17072338	A/chicken/Scotland/026217/2023	Animal and Plant Health Agency (APHA)	Animal and Plant Health Agency (APHA)
EPI2437342	HA	United Kingdom	2023-Feb-11	EPI_ISL_17072337	A/chicken/Wales/023780/2023	Animal and Plant Health Agency (APHA)	Animal and Plant Health Agency (APHA)
EPI2437334	HA	United Kingdom	2023-Feb-07	EPI_ISL_17072336	A/chicken/England/022451/2023	Animal and Plant Health Agency (APHA)	Animal and Plant Health Agency (APHA)
EPI2305289	HA	Czech Republic	2022-Jan-10	EPI_ISL_16613718	A/chicken/Czech_Republic/22968_orig/2022	State Veterinary Institute Prague	State Veterinary Institute Prague	Alexander,Nagy;Lenka,Cernikova;Martina,Stara
EPI2305273	HA	Czech Republic	2023-Jan-04	EPI_ISL_16613716	A/chicken/Czech_Republic/185_orig/2023	State Veterinary Institute Prague	State Veterinary Institute Prague	Alexander,Nagy;Lenka,Cernikova;Martina,Stara
EPI2305257	HA	Czech Republic	2023-Jan-04	EPI_ISL_16613714	A/chicken/Czech_Republic/179_shed-1B_orig/2023	State Veterinary Institute Prague	State Veterinary Institute Prague	Alexander,Nagy;Lenka,Cernikova;Martina,Stara
EPI2305249	HA	Czech Republic	2023-Jan-04	EPI_ISL_16613713	A/chicken/Czech_Republic/178_shed-1A_orig/2023	State Veterinary Institute Prague	State Veterinary Institute Prague	Alexander,Nagy;Lenka,Cernikova;Martina,Stara
EPI2305241	HA	Czech Republic	2023-Jan-02	EPI_ISL_16613712	A/chicken/Czech_Republic/102_orig/2023	State Veterinary Institute Prague	State Veterinary Institute Prague	Alexander,Nagy;Lenka,Cernikova;Martina,Stara
EPI2305233	HA	Czech Republic	2022-Dec-30	EPI_ISL_16613711	A/chicken/Czech_Republic/67_orig/2023	State Veterinary Institute Prague	State Veterinary Institute Prague	Alexander,Nagy;Lenka,Cernikova;Martina,Stara
EPI2050413	HA	United States	2022-Mar-26	EPI_ISL_13009694	A/chicken/Wyoming/22-009599-002/2022	National Veterinary Services Laboratories - USDA	National Veterinary Services Laboratories - USDA	Chinh,Thanh;Franzen,Kerrie;Love, Emily;Killian,Mary;Koster,Leo;Lantz,Kristina;Stuber,Tod;Hicks,Jessica
EPI1944477	HA	Italy	2021-Oct-28	EPI_ISL_7733644	A/chicken/Italy/IZSLT-122448_21VIR9218-1/2021	Istituto Zooprofilattico Sperimentale del Lazio e della Toscana "M. Aleandri"	Istituto Zooprofilattico Sperimentale Delle Venezie	Zecchin, B.; Fusaro, A.; Schivo, A.; Salviato, A.; Palumbo, E.; Milani, A.; Giussani, E.; Pastori, A.; Monne, I.; Terregino, C.
EPI1944453	HA	Italy	2021-Nov-26	EPI_ISL_7733641	A/chicken/Italy/21VIR10352/2021	Istituto Zooprofilattico Sperimentale delle Venezie, EU/OIE/Reference Laboratory and FAO Reference Centre for AI and ND	Istituto Zooprofilattico Sperimentale Delle Venezie	Zecchin, B.; Fusaro, A.; Schivo, A.; Salviato, A.; Palumbo, E.; Milani, A.; Giussani, E.; Pastori, A.; Monne, I.; Terregino, C.
EPI1944429	HA	Italy	2021-Nov-17	EPI_ISL_7733634	A/chicken/Italy/21VIR9765-12/2021	Istituto Zooprofilattico Sperimentale delle Venezie, EU/OIE/Reference Laboratory and FAO Reference Centre for AI and ND	Istituto Zooprofilattico Sperimentale Delle Venezie	Zecchin, B.; Fusaro, A.; Schivo, A.; Salviato, A.; Palumbo, E.; Milani, A.; Giussani, E.; Pastori, A.; Monne, I.; Terregino, C.
EPI1944405	HA	Italy	2021-Nov-15	EPI_ISL_7733630	A/chicken/Italy/21VIR9691-2/2021	Istituto Zooprofilattico Sperimentale delle Venezie, EU/OIE/Reference Laboratory and FAO Reference Centre for AI and ND	Istituto Zooprofilattico Sperimentale Delle Venezie	Zecchin, B.; Fusaro, A.; Schivo, A.; Salviato, A.; Palumbo, E.; Milani, A.; Giussani, E.; Pastori, A.; Monne, I.; Terregino, C.
EPI1944365	HA	Italy	2021-Nov-04	EPI_ISL_7733617	A/chicken/Italy/21VIR9133-20/2021	Istituto Zooprofilattico Sperimentale delle Venezie, EU/OIE/Reference Laboratory and FAO Reference Centre for AI and ND	Istituto Zooprofilattico Sperimentale Delle Venezie	Zecchin, B.; Fusaro, A.; Schivo, A.; Salviato, A.; Palumbo, E.; Milani, A.; Giussani, E.; Pastori, A.; Monne, I.; Terregino, C.
EPI1944328	HA	Italy	2021-Nov-15	EPI_ISL_7733609	A/chicken/Italy/21VIR9580-22/2021	Istituto Zooprofilattico Sperimentale delle Venezie, EU/OIE/Reference Laboratory and FAO Reference Centre for AI and ND	Istituto Zooprofilattico Sperimentale Delle Venezie	Zecchin, B.; Fusaro, A.; Schivo, A.; Salviato, A.; Palumbo, E.; Milani, A.; Giussani, E.; Pastori, A.; Monne, I.; Terregino, C.
EPI1944320	HA	Italy	2021-Nov-30	EPI_ISL_7733607	A/chicken/Italy/21VIR10384/2021	Istituto Zooprofilattico Sperimentale delle Venezie, EU/OIE/Reference Laboratory and FAO Reference Centre for AI and ND	Istituto Zooprofilattico Sperimentale Delle Venezie	Zecchin, B.; Fusaro, A.; Schivo, A.; Salviato, A.; Palumbo, E.; Milani, A.; Giussani, E.; Pastori, A.; Monne, I.; Terregino, C.
EPI1944312	HA	Italy	2021-Nov-22	EPI_ISL_7733603	A/chicken/Italy/21VIR9951-25/2021	Istituto Zooprofilattico Speriment. Lombardia, Emilia Ro. IZSLER	Istituto Zooprofilattico Sperimentale Delle Venezie	Zecchin, B.; Fusaro, A.; Schivo, A.; Salviato, A.; Palumbo, E.; Milani, A.; Giussani, E.; Pastori, A.; Monne, I.; Terregino, C.
EPI1944304	HA	Italy	2021-Nov-30	EPI_ISL_7733599	A/chicken/Italy/21VIR10389/2021	Istituto Zooprofilattico Speriment. Lombardia, Emilia Ro. IZSLER	Istituto Zooprofilattico Sperimentale Delle Venezie	Zecchin, B.; Fusaro, A.; Schivo, A.; Salviato, A.; Palumbo, E.; Milani, A.; Giussani, E.; Pastori, A.; Monne, I.; Terregino, C.
EPI1944280	HA	Italy	2021-Nov-25	EPI_ISL_7733595	A/chicken/Italy/21VIR10239/2021	Istituto Zooprofilattico Speriment. Lombardia, Emilia Ro. IZSLER	Istituto Zooprofilattico Sperimentale Delle Venezie	Zecchin, B.; Fusaro, A.; Schivo, A.; Salviato, A.; Palumbo, E.; Milani, A.; Giussani, E.; Pastori, A.; Monne, I.; Terregino, C.
EPI1944240	HA	Italy	2021-Nov-30	EPI_ISL_7733582	A/chicken/Italy/21VIR10388/2021	Istituto Zooprofilattico Speriment. Lombardia, Emilia Ro. IZSLER	Istituto Zooprofilattico Sperimentale Delle Venezie	Zecchin, B.; Fusaro, A.; Schivo, A.; Salviato, A.; Palumbo, E.; Milani, A.; Giussani, E.; Pastori, A.; Monne, I.; Terregino, C.
EPI2219874	HA	Canada	2022-Apr-12	EPI_ISL_15844573	A/Broiler Chicken/BC/FAV-0228/2022 (H5N1)	Animal Health Centre, Ministry of Agriculture	Canadian Food Inspection Agency
EPI2437539	HA	United Kingdom	2023-Feb-05	EPI_ISL_17072781	A/Domestic_duck/Wales/020076/2023	Animal and Plant Health Agency (APHA)	Animal and Plant Health Agency (APHA)
EPI2231263	HA	United Kingdom	2022-Nov-15	EPI_ISL_15942297	A/domestic_duck/England/152473/2022	Animal and Plant Health Agency (APHA)	Animal and Plant Health Agency (APHA)	Maskell,Daniel
EPI1944248	HA	Italy	2021-Dec-01	EPI_ISL_7733584	A/duck/Italy/21VIR10447/2021	Istituto Zooprofilattico Speriment. Lombardia, Emilia Ro. IZSLER	Istituto Zooprofilattico Sperimentale Delle Venezie	Zecchin, B.; Fusaro, A.; Schivo, A.; Salviato, A.; Palumbo, E.; Milani, A.; Giussani, E.; Pastori, A.; Monne, I.; Terregino, C.
EPI475579	HA	China	2011-Apr-14	EPI_ISL_148126	A/wild duck/Shandong/628/2011	Harbin Veterinary Research Institute (CAAS)	Harbin Veterinary Research Institute (CAAS)	Liu,Y., Liu,M. and Liu,C.
EPI2071904	HA	United Kingdom	2021-Dec-29	EPI_ISL_13370622	A/domestic_duck/England/076200/2021	Animal and Plant Health Agency (APHA)	Animal and Plant Health Agency (APHA)
EPI2071856	HA	United Kingdom	2021-Dec-21	EPI_ISL_13370616	A/domestic_duck/England/074574/2021	Animal and Plant Health Agency (APHA)	Animal and Plant Health Agency (APHA)
EPI2071736	HA	United Kingdom	2021-Dec-12	EPI_ISL_13370572	A/domestic_duck/England/070195/2021	Animal and Plant Health Agency (APHA)	Animal and Plant Health Agency (APHA)
EPI2071704	HA	United Kingdom	2021-Dec-10	EPI_ISL_13370568	A/domestic_duck/Northern_Ireland/17961/2021	Animal and Plant Health Agency (APHA)	Animal and Plant Health Agency (APHA)
EPI2071688	HA	United Kingdom	2021-Dec-10	EPI_ISL_13370563	A/domestic_duck/England/069098/2021	Animal and Plant Health Agency (APHA)	Animal and Plant Health Agency (APHA)
EPI2071584	HA	United Kingdom	2021-Dec-06	EPI_ISL_13370519	A/domestic_duck/England/066456/2021	Animal and Plant Health Agency (APHA)	Animal and Plant Health Agency (APHA)
EPI2071536	HA	United Kingdom	2021-Dec-04	EPI_ISL_13370513	A/domestic_duck/England/065343/2021	Animal and Plant Health Agency (APHA)	Animal and Plant Health Agency (APHA)
EPI2071400	HA	United Kingdom	2021-Nov-30	EPI_ISL_13370249	A/domestic_duck/Northern_Ireland/17400/2021	Animal and Plant Health Agency (APHA)	Animal and Plant Health Agency (APHA)
EPI2071392	HA	United Kingdom	2021-Nov-23	EPI_ISL_13370248	A/domestic_duck/Wales/061914/2021	Animal and Plant Health Agency (APHA)	Animal and Plant Health Agency (APHA)
EPI2071160	HA	United Kingdom	2021-Nov-14	EPI_ISL_13369757	A/mallard/Scotland/057554/2021	Animal and Plant Health Agency (APHA)	Animal and Plant Health Agency (APHA)
EPI2071080	HA	United Kingdom	2021-Nov-08	EPI_ISL_13369743	A/mallard/England/056080/2021	Animal and Plant Health Agency (APHA)	Animal and Plant Health Agency (APHA)
EPI2071872	HA	United Kingdom	2021-Dec-22	EPI_ISL_13370618	A/sparrowhawk/England/245233/2021	Animal and Plant Health Agency (APHA)	Animal and Plant Health Agency (APHA)
EPI2071864	HA	United Kingdom	2021-Dec-21	EPI_ISL_13370617	A/common_buzzard/England/075831/2021	Animal and Plant Health Agency (APHA)	Animal and Plant Health Agency (APHA)
EPI2071848	HA	United Kingdom	2021-Dec-17	EPI_ISL_13370615	A/common_buzzard/England/245061/2021	Animal and Plant Health Agency (APHA)	Animal and Plant Health Agency (APHA)
EPI2071408	HA	United Kingdom	2021-Nov-29	EPI_ISL_13370343	A/buzzard/Wales/055388/2021	Animal and Plant Health Agency (APHA)	Animal and Plant Health Agency (APHA)
EPI2071264	HA	United Kingdom	2021-Nov-20	EPI_ISL_13369770	A/common_buzzard/England/300284/2021	Animal and Plant Health Agency (APHA)	Animal and Plant Health Agency (APHA)
EPI2071024	HA	United Kingdom	2021-Nov-02	EPI_ISL_13369398	A/buzzard/England/107870/2021	Animal and Plant Health Agency (APHA)	Animal and Plant Health Agency (APHA)
EPI2201175	HA	United States	2022-Mar-14	EPI_ISL_15614807	A/red-tailed hawk/Kansas/W22-198/2022	St. Jude Center of Excellence for Influenza Research and Response - CEIRR Influenza Data Processing and Communication Center	St. Jude Center of Excellence for Influenza Research and Response - CEIRR Influenza Data Processing and Communication Center	Poulson,R., Stallknecht,D., Rubrum,A., Jeevan,T., Walker,D. and Webby,R.
EPI2071368	HA	United Kingdom	2021-Nov-27	EPI_ISL_13369783	A/canada_goose/England/300363/2021	Animal and Plant Health Agency (APHA)	Animal and Plant Health Agency (APHA)
EPI2201170	HA	United States	2022-Jan-23	EPI_ISL_15614805	A/Lesser scaup/MD/-LC-EESC-024/2022	St. Jude Center of Excellence for Influenza Research and Response - CEIRR Influenza Data Processing and Communication Center	St. Jude Center of Excellence for Influenza Research and Response - CEIRR Influenza Data Processing and Communication Center	Poulson,R., Stallknecht,D., Fabrizio,T., Jeevan,T., Walker,D. and Webby,R.
EPI2616249	HA	Ecuador	2023-Jan-11	EPI_ISL_17973443	A/wildbird-Fregata-magnificens/Ecuador/IC03-4587/2023	Ministerio del Ambiente, Agua y Transición Ecológica (MAATE)	Instituto Nacional de Investigación en Salud Pública INSPI	Andres, Carrazco-Montalvo*; Lucia, Luje*; Diana, Gutierrez-Pallo; Daniel, Alava; Damaris, Alarcón; Carlos, Valle; Natali, Arguello; David, de la Torre
EPI2351916	HA	Belgium	2022-Jul-18	EPI_ISL_16810698	A/Bubo_bubo/Belgium/09467_0001/2022	Sciensano - Animal Infectious Diseases	Sciensano, Department of Animal Infectious Diseases	Van Borm, Steven; Roupie, Virginie; Hostyn, Pierre; Lambrecht, Benedicte; Steensels, Mieke
EPI2351400	HA	Belgium	2022-Sep-10	EPI_ISL_16810069	A/Morus_bassanus/Belgium/10811_0001/2022	Sciensano - Animal Infectious Diseases	Sciensano, Department of Animal Infectious Diseases	Van Borm, Steven; Roupie, Virginie; Hostyn, Pierre; Lambrecht, Benedicte; Steensels, Mieke
EPI1944461	HA	Italy	2021-Nov-30	EPI_ISL_7733642	A/kestrel/Italy/21VIR10468/2021	Istituto Zooprofilattico Sperimentale delle Venezie, EU/OIE/Reference Laboratory and FAO Reference Centre for AI and ND	Istituto Zooprofilattico Sperimentale Delle Venezie	Zecchin, B.; Fusaro, A.; Schivo, A.; Salviato, A.; Palumbo, E.; Milani, A.; Giussani, E.; Pastori, A.; Monne, I.; Terregino, C.
EPI1944373	HA	Italy	2021-Nov-11	EPI_ISL_7733621	A/seagull/Italy/21VIR9432-2/2021	Istituto Zooprofilattico Sperimentale delle Venezie, EU/OIE/Reference Laboratory and FAO Reference Centre for AI and ND	Istituto Zooprofilattico Sperimentale Delle Venezie	Zecchin, B.; Fusaro, A.; Schivo, A.; Salviato, A.; Palumbo, E.; Milani, A.; Giussani, E.; Pastori, A.; Monne, I.; Terregino, C.
EPI1944349	HA	Italy	2021-Nov-05	EPI_ISL_7733612	A/magpie/Italy/21VIR9487-2/2021	Istituto Zooprofilattico Sperimentale delle Venezie, EU/OIE/Reference Laboratory and FAO Reference Centre for AI and ND	Istituto Zooprofilattico Sperimentale Delle Venezie	Zecchin, B.; Fusaro, A.; Schivo, A.; Salviato, A.; Palumbo, E.; Milani, A.; Giussani, E.; Pastori, A.; Monne, I.; Terregino, C.
EPI1944341	HA	Italy	2021-Nov-23	EPI_ISL_7733611	A/Wild_goose/Italy/21VIR10193/2021	Istituto Zooprofilattico Sperimentale delle Venezie, EU/OIE/Reference Laboratory and FAO Reference Centre for AI and ND	Istituto Zooprofilattico Sperimentale Delle Venezie	Zecchin, B.; Fusaro, A.; Schivo, A.; Salviato, A.; Palumbo, E.; Milani, A.; Giussani, E.; Pastori, A.; Monne, I.; Terregino, C.
EPI1944272	HA	Italy	2021-Oct-27	EPI_ISL_7733591	A/mallard/Italy/21VIR8919-2/2021	Istituto Zooprofilattico Speriment. Lombardia, Emilia Ro. IZSLER	Istituto Zooprofilattico Sperimentale Delle Venezie	Zecchin, B.; Fusaro, A.; Schivo, A.; Salviato, A.; Palumbo, E.; Milani, A.; Giussani, E.; Pastori, A.; Monne, I.; Terregino, C.
EPI1944256	HA	Italy	2021-Oct-28	EPI_ISL_7733585	A/Eurasian_wigeon/Italy/21VIR8919-3/2021	Istituto Zooprofilattico Speriment. Lombardia, Emilia Ro. IZSLER	Istituto Zooprofilattico Sperimentale Delle Venezie	Zecchin, B.; Fusaro, A.; Schivo, A.; Salviato, A.; Palumbo, E.; Milani, A.; Giussani, E.; Pastori, A.; Monne, I.; Terregino, C.
EPI2305281	HA	Czech Republic	2023-Jan-05	EPI_ISL_16613717	A/mallard/Czech_Republic/186_orig/2023	State Veterinary Institute Prague	State Veterinary Institute Prague	Alexander,Nagy;Lenka,Cernikova;Martina,Stara
EPI2315250	HA	Netherlands	2023-Jan-02	EPI_ISL_16679310	A/Eurasian Curlew/Netherlands/23000153-002/2023	Wageningen Bioveterinary Research	Wageningen Bioveterinary Research	Beerens, Nancy; Harders, Frank; Pritz-Verschuren, Sylvia; Roose, Marit; Venema, Sandra; Germeraad, Evelien; Engelsma, Marc; Heutink, Rene
EPI2794515	HA	Sweden	2023-Oct-30	EPI_ISL_18514137	A/Greylag goose /Sweden/SVA231101SZ0522/FB0045269/AB-2023	Swedish Veterinary Agency (SVA)	Swedish Veterinary Agency (SVA)	"Siamak,Zohari"
EPI2308471	HA	Sweden	2023-Jan-02	EPI_ISL_16630763	A/Greylag goose/Sweden/SVA230103SZ0388/FB000036/M-2023	Swedish Veterinary Agency (SVA)	Swedish Veterinary Agency (SVA)	'Siamak,Zohari'
EPI2244351	HA	Germany	2022-Jul-21	EPI_ISL_16122152	A/greylag goose/Germany-SH/AI04283/2022	Landeslabor Schleswig-Holstein	Friedrich-Loeffler-Institut
EPI1982821	HA	Sweden	2021-Dec-17	EPI_ISL_9650684	A/Greylag goose/Sweden/SVA211118SZ0354/FB004554/2021	Swedish Veterinary Agency (SVA)	Swedish Veterinary Agency (SVA)
EPI2351908	HA	Belgium	2022-Aug-30	EPI_ISL_16810562	A/Mixed_wild_birds/Belgium/10368_0001/2022	Sciensano - Animal Infectious Diseases	Sciensano, Department of Animal Infectious Diseases	Van Borm, Steven; Roupie, Virginie; Hostyn, Pierre; Lambrecht, Benedicte; Steensels, Mieke
EPI2296314	HA	Belgium	2022-Oct-01	EPI_ISL_16548638	A/Phasianus_colchicus/Belgium/11704-0003/2022	Sciensano - Animal Infectious Diseases	Sciensano, Department of Animal Infectious Diseases	Van Borm, Steven; Roupie, Virginie; Hostyn, Pierre; Lambrecht, Benedicte; Steensels, Mieke
EPI2296243	HA	Belgium	2022-Nov-10	EPI_ISL_16548356	A/Phasianus_colchicus/Belgium/13027-0001/2022	Sciensano - Animal Infectious Diseases	Sciensano, Department of Animal Infectious Diseases	Van Borm, Steven; Roupie, Virginie; Hostyn, Pierre; Lambrecht, Benedicte; Steensels, Mieke
EPI2071664	HA	United Kingdom	2021-Dec-09	EPI_ISL_13370560	A/pheasant/England/294628/2021	Animal and Plant Health Agency (APHA)	Animal and Plant Health Agency (APHA)
EPI2071032	HA	United Kingdom	2021-Nov-02	EPI_ISL_13369399	A/pheasant/England/107851/2021	Animal and Plant Health Agency (APHA)	Animal and Plant Health Agency (APHA)
EPI2201157	HA	Egypt	2022-Jun-17	EPI_ISL_15614803	A/ibis/Egypt/RLQP-229S/2022	Animal Health Research Institute, Virology	Animal Health Research Institute, Virology	Mosaad,Z., Hassan,M., Hagage,N., Mady,W., Shahine,M., Eid,S., Mahmoud,A. and Erfan,A.
EPI1956656	HA	Netherlands	2021-Dec-20	EPI_ISL_8650949	A/red knot/Netherlands/21041030-008/2021	Wageningen Bioveterinary Research	Wageningen Bioveterinary Research	Beerens, Nancy; Harders, Frank; Pritz-Verschuren, Sylvia; Roose, Marit; Venema, Sandra; Germeraad, Evelien; Engelsma, Marc; Heutink, Rene
EPI2219866	HA	Canada	2022-Feb-03	EPI_ISL_15843373	A/Bald Eagle/BC/OTH-33-36/2022 (H5N1)	Animal Health Centre, Ministry of Agriculture	Canadian Food Inspection Agency
EPI1943098	HA	Sweden	2021-Nov-26	EPI_ISL_7635907	A/white-tailed eagle/Sweden/SVA211201SZ0380/FB004721/M-2021	Swedish Veterinary Agency (SVA)	Swedish Veterinary Agency (SVA)
EPI2608187	HA	Sweden	2023-Jun-15	EPI_ISL_17859575	A/black-headed gull/Sweden/SVA230620SZ0298/FB002026/H-2023	Swedish Veterinary Agency (SVA)	Swedish Veterinary Agency (SVA)	"Siamak,Zohari"
EPI2608179	HA	Sweden	2023-Jun-15	EPI_ISL_17859569	A/black-headed gull/Sweden/SVA230620SZ0298/FB002027/H-2023	Swedish Veterinary Agency (SVA)	Swedish Veterinary Agency (SVA)	"Siamak,Zohari"
EPI2496406	HA	Belgium	2023-Jan-26	EPI_ISL_17367266	A/Chroicocephalus_ridibundus/Belgium/00816_0001/2023	Sciensano - Animal Infectious Diseases	Sciensano, Department of Animal Infectious Diseases	Van Borm, Steven; Roupie, Virginie; Hostyn, Pierre; Mathijs, Elisabeth; Lambrecht, Benedicte; Steensels, Mieke
EPI2071296	HA	United Kingdom	2021-Nov-22	EPI_ISL_13369774	A/black-headed_gull/England/386075/2021	Animal and Plant Health Agency (APHA)	Animal and Plant Health Agency (APHA)
EPI2794499	HA	Sweden	2023-Nov-14	EPI_ISL_18514132	A/barnacle goose/Sweden/SVA231107SZ0383/FB004550/H-2023	Swedish Veterinary Agency (SVA)	Swedish Veterinary Agency (SVA)	"Siamak,Zohari"
EPI2308479	HA	Sweden	2023-Jan-03	EPI_ISL_16630765	A/barnacle goose/Sweden/SVA230104SZ0286/FB000038/M-2023	Swedish Veterinary Agency (SVA)	Swedish Veterinary Agency (SVA)	'Siamak,Zohari'
EPI2071672	HA	United Kingdom	2021-Dec-09	EPI_ISL_13370561	A/barnacle_goose/England/294620/2021	Animal and Plant Health Agency (APHA)	Animal and Plant Health Agency (APHA)
EPI2071608	HA	United Kingdom	2021-Dec-06	EPI_ISL_13370522	A/barnacle_goose/Scotland/072143/2021	Animal and Plant Health Agency (APHA)	Animal and Plant Health Agency (APHA)
EPI2071568	HA	United Kingdom	2021-Dec-04	EPI_ISL_13370517	A/barnacle_goose/England/294327/2021	Animal and Plant Health Agency (APHA)	Animal and Plant Health Agency (APHA)
EPI2071344	HA	United Kingdom	2021-Nov-26	EPI_ISL_13369780	A/barnacle_goose/England/293809/2021	Animal and Plant Health Agency (APHA)	Animal and Plant Health Agency (APHA)
EPI2071336	HA	United Kingdom	2021-Nov-26	EPI_ISL_13369779	A/barnacle_goose/England/293824/2021	Animal and Plant Health Agency (APHA)	Animal and Plant Health Agency (APHA)
EPI2071232	HA	United Kingdom	2021-Nov-19	EPI_ISL_13369766	A/barnacle_goose/Scotland/062007/2021	Animal and Plant Health Agency (APHA)	Animal and Plant Health Agency (APHA)
EPI2071224	HA	United Kingdom	2021-Nov-19	EPI_ISL_13369765	A/barnacle_goose/Scotland/062003/2021	Animal and Plant Health Agency (APHA)	Animal and Plant Health Agency (APHA)
EPI2071200	HA	United Kingdom	2021-Nov-17	EPI_ISL_13369762	A/barnacle_goose/England/061307/2021	Animal and Plant Health Agency (APHA)	Animal and Plant Health Agency (APHA)
EPI2071128	HA	United Kingdom	2021-Nov-12	EPI_ISL_13369753	A/barnacle_goose/Scotland/292583/2021	Animal and Plant Health Agency (APHA)	Animal and Plant Health Agency (APHA)
EPI2071112	HA	United Kingdom	2021-Nov-12	EPI_ISL_13369747	A/Barnacle_goose/England/108089/2021	Animal and Plant Health Agency (APHA)	Animal and Plant Health Agency (APHA)
EPI2071088	HA	United Kingdom	2021-Nov-08	EPI_ISL_13369744	A/barnacle_goose/England/292151/2021	Animal and Plant Health Agency (APHA)	Animal and Plant Health Agency (APHA)
EPI1994523	HA	Sweden	2022-Feb-14	EPI_ISL_10944835	A/barnacle goose/Sweden/SVA220217SZ0388/FB00388/K-2022	Swedish Veterinary Agency (SVA)	Swedish Veterinary Agency (SVA)
EPI1982600	HA	Sweden	2021-Dec-20	EPI_ISL_9650269	A/barnacle_goose/Sweden/SVA211220SZ0202/FB004847/2021	Swedish Veterinary Agency (SVA)	Swedish Veterinary Agency (SVA)
EPI1982591	HA	Sweden	2021-Dec-09	EPI_ISL_9650220	A/barnacle_goose/Sweden/SVA211216SZ0382/FB004836/2021	Swedish Veterinary Agency (SVA)	Swedish Veterinary Agency (SVA)
EPI1943856	HA	Germany	2021-Apr-08	EPI_ISL_5145422	A/barnacle goose/Germany-NI/AI03914/2021	Lebensmittel- und Veterinärinstitut Oldenburg - Standort Veterinärinstitut	Friedrich-Loeffler-Institut
EPI2437152	HA	Belgium	2023-Feb-06	EPI_ISL_17072312	A/Gallus_gallus/Belgium/01172_0001/2023	Sciensano - Animal Infectious Diseases	Sciensano, Department of Animal Infectious Diseases	Van Borm, Steven; Roupie, Virginie; Hostyn, Pierre; Mathijs, Elisabeth; Lambrecht, Benedicte; Steensels, Mieke
EPI2437060	HA	Belgium	2023-Feb-03	EPI_ISL_17072173	A/Gallus_gallus/Belgium/01111_0002/2023	Sciensano - Animal Infectious Diseases	Sciensano, Department of Animal Infectious Diseases	Van Borm, Steven; Roupie, Virginie; Hostyn, Pierre; Mathijs, Elisabeth; Lambrecht, Benedicte; Steensels, Mieke
EPI2296306	HA	Belgium	2022-Nov-22	EPI_ISL_16548600	A/Gallus_gallus/Belgium/12485-0001/2022	Sciensano - Animal Infectious Diseases	Sciensano, Department of Animal Infectious Diseases	Van Borm, Steven; Roupie, Virginie; Hostyn, Pierre; Lambrecht, Benedicte; Steensels, Mieke
EPI2296256	HA	Belgium	2022-Nov-09	EPI_ISL_16548429	A/Gallus_gallus/Belgium/13078-0001/2022	Sciensano - Animal Infectious Diseases	Sciensano, Department of Animal Infectious Diseases	Van Borm, Steven; Roupie, Virginie; Hostyn, Pierre; Lambrecht, Benedicte; Steensels, Mieke
EPI2296224	HA	Belgium	2022-Dec-08	EPI_ISL_16547851	A/Gallus_gallus/Belgium/14313-001/2022	Sciensano - Animal Infectious Diseases	Sciensano, Department of Animal Infectious Diseases	Van Borm, Steven; Roupie, Virginie; Hostyn, Pierre; Lambrecht, Benedicte; Steensels, Mieke
EPI2278049	HA	United Kingdom	2022-Dec-14	EPI_ISL_16384162	A/chicken/England/169222/2022	Animal and Plant Health Agency (APHA)	Animal and Plant Health Agency (APHA)
EPI2278033	HA	United Kingdom	2022-Dec-06	EPI_ISL_16384160	A/chicken/Scotland/163935/2022	Animal and Plant Health Agency (APHA)	Animal and Plant Health Agency (APHA)
EPI2277993	HA	United Kingdom	2022-Nov-26	EPI_ISL_16384155	A/Chicken/England/159529/2022	Animal and Plant Health Agency (APHA)	Animal and Plant Health Agency (APHA)
EPI2277985	HA	United Kingdom	2022-Nov-26	EPI_ISL_16384154	A/Chicken/Scotland/159456/2022	Animal and Plant Health Agency (APHA)	Animal and Plant Health Agency (APHA)
EPI2277977	HA	United Kingdom	2022-Nov-25	EPI_ISL_16384153	A/Chicken/England/159386/2022	Animal and Plant Health Agency (APHA)	Animal and Plant Health Agency (APHA)
EPI2277929	HA	United Kingdom	2022-Nov-20	EPI_ISL_16384147	A/Chicken/England/155942/2022	Animal and Plant Health Agency (APHA)	Animal and Plant Health Agency (APHA)
EPI2277921	HA	United Kingdom	2022-Nov-20	EPI_ISL_16384146	A/Chicken/England/154451/2022	Animal and Plant Health Agency (APHA)	Animal and Plant Health Agency (APHA)
EPI2277913	HA	United Kingdom	2022-Nov-19	EPI_ISL_16384145	A/Chicken/Scotland/153380/2022	Animal and Plant Health Agency (APHA)	Animal and Plant Health Agency (APHA)
EPI2277889	HA	United Kingdom	2022-Nov-19	EPI_ISL_16384142	A/Chicken/England/154150/2022	Animal and Plant Health Agency (APHA)	Animal and Plant Health Agency (APHA)
EPI2277881	HA	United Kingdom	2022-Nov-16	EPI_ISL_16384141	A/Chicken/Scotland/153852/2022	Animal and Plant Health Agency (APHA)	Animal and Plant Health Agency (APHA)
EPI2071912	HA	United Kingdom	2021-Dec-29	EPI_ISL_13370623	A/chicken/England/076198/2021	Animal and Plant Health Agency (APHA)	Animal and Plant Health Agency (APHA)
EPI2071840	HA	United Kingdom	2021-Dec-17	EPI_ISL_13370614	A/chicken/England/072926/2021	Animal and Plant Health Agency (APHA)	Animal and Plant Health Agency (APHA)
EPI2071832	HA	United Kingdom	2021-Dec-17	EPI_ISL_13370613	A/chicken/England/073008/2021	Animal and Plant Health Agency (APHA)	Animal and Plant Health Agency (APHA)
EPI2071824	HA	United Kingdom	2021-Dec-16	EPI_ISL_13370612	A/chicken/England/072378/2021	Animal and Plant Health Agency (APHA)	Animal and Plant Health Agency (APHA)
EPI2071808	HA	United Kingdom	2021-Dec-15	EPI_ISL_13370610	A/chicken/England/072132/2021	Animal and Plant Health Agency (APHA)	Animal and Plant Health Agency (APHA)
EPI2071800	HA	United Kingdom	2021-Dec-15	EPI_ISL_13370609	A/chicken/England/071631/2021	Animal and Plant Health Agency (APHA)	Animal and Plant Health Agency (APHA)
EPI2071792	HA	United Kingdom	2021-Dec-15	EPI_ISL_13370608	A/chicken/England/072084/2021	Animal and Plant Health Agency (APHA)	Animal and Plant Health Agency (APHA)
EPI2071784	HA	United Kingdom	2021-Dec-14	EPI_ISL_13370607	A/chicken/Scotland/070931/2021	Animal and Plant Health Agency (APHA)	Animal and Plant Health Agency (APHA)
EPI2071776	HA	United Kingdom	2021-Dec-14	EPI_ISL_13370606	A/chicken/England/071013/2021	Animal and Plant Health Agency (APHA)	Animal and Plant Health Agency (APHA)
EPI2071768	HA	United Kingdom	2021-Dec-14	EPI_ISL_13370605	A/chicken/England/068020/2021	Animal and Plant Health Agency (APHA)	Animal and Plant Health Agency (APHA)
EPI2071760	HA	United Kingdom	2021-Dec-13	EPI_ISL_13370604	A/chicken/England/070810/2021	Animal and Plant Health Agency (APHA)	Animal and Plant Health Agency (APHA)
EPI2071752	HA	United Kingdom	2021-Dec-13	EPI_ISL_13370603	A/chicken/England/070359/2021	Animal and Plant Health Agency (APHA)	Animal and Plant Health Agency (APHA)
EPI2071744	HA	United Kingdom	2021-Dec-13	EPI_ISL_13370573	A/chicken/England/070277/2021	Animal and Plant Health Agency (APHA)	Animal and Plant Health Agency (APHA)
EPI2071728	HA	United Kingdom	2021-Dec-12	EPI_ISL_13370571	A/chicken/England/069816/2021	Animal and Plant Health Agency (APHA)	Animal and Plant Health Agency (APHA)
EPI2071720	HA	United Kingdom	2021-Dec-11	EPI_ISL_13370570	A/chicken/England/070105/2021	Animal and Plant Health Agency (APHA)	Animal and Plant Health Agency (APHA)
EPI2071712	HA	United Kingdom	2021-Dec-11	EPI_ISL_13370569	A/chicken/England/069549/2021	Animal and Plant Health Agency (APHA)	Animal and Plant Health Agency (APHA)
EPI2071696	HA	United Kingdom	2021-Dec-09	EPI_ISL_13370564	A/chicken/Northern_Ireland/17903/2021	Animal and Plant Health Agency (APHA)	Animal and Plant Health Agency (APHA)
EPI2071680	HA	United Kingdom	2021-Dec-09	EPI_ISL_13370562	A/chicken/Scotland/068270/2021	Animal and Plant Health Agency (APHA)	Animal and Plant Health Agency (APHA)
EPI2071648	HA	United Kingdom	2021-Dec-09	EPI_ISL_13370558	A/chicken/England/068375/2021	Animal and Plant Health Agency (APHA)	Animal and Plant Health Agency (APHA)
EPI2071640	HA	United Kingdom	2021-Dec-08	EPI_ISL_13370557	A/chicken/Scotland/068163/2021	Animal and Plant Health Agency (APHA)	Animal and Plant Health Agency (APHA)
EPI2071616	HA	United Kingdom	2021-Dec-08	EPI_ISL_13370523	A/chicken/England/067219/2021	Animal and Plant Health Agency (APHA)	Animal and Plant Health Agency (APHA)
EPI2071576	HA	United Kingdom	2021-Dec-05	EPI_ISL_13370518	A/chicken/England/066782/2021	Animal and Plant Health Agency (APHA)	Animal and Plant Health Agency (APHA)
EPI2071552	HA	United Kingdom	2021-Dec-04	EPI_ISL_13370515	A/chicken/England/066019/2021	Animal and Plant Health Agency (APHA)	Animal and Plant Health Agency (APHA)
EPI2071544	HA	United Kingdom	2021-Dec-04	EPI_ISL_13370514	A/chicken/England/065487/2021	Animal and Plant Health Agency (APHA)	Animal and Plant Health Agency (APHA)
EPI2071512	HA	United Kingdom	2021-Dec-02	EPI_ISL_13370510	A/chicken/Scotland/064936/2021	Animal and Plant Health Agency (APHA)	Animal and Plant Health Agency (APHA)
EPI2071376	HA	United Kingdom	2021-Nov-28	EPI_ISL_13369784	A/chicken/England/063664/2021	Animal and Plant Health Agency (APHA)	Animal and Plant Health Agency (APHA)
EPI2071352	HA	United Kingdom	2021-Dec-01	EPI_ISL_13369781	A/chicken/Northern_Ireland/17463/2021	Animal and Plant Health Agency (APHA)	Animal and Plant Health Agency (APHA)
EPI2071320	HA	United Kingdom	2021-Nov-25	EPI_ISL_13369777	A/chicken/England/062137/2021	Animal and Plant Health Agency (APHA)	Animal and Plant Health Agency (APHA)
EPI2071288	HA	United Kingdom	2021-Nov-22	EPI_ISL_13369773	A/chicken/England/061529/2021	Animal and Plant Health Agency (APHA)	Animal and Plant Health Agency (APHA)
EPI2071280	HA	United Kingdom	2021-Nov-22	EPI_ISL_13369772	A/chicken/England/061210/2021	Animal and Plant Health Agency (APHA)	Animal and Plant Health Agency (APHA)
EPI2071256	HA	United Kingdom	2021-Nov-20	EPI_ISL_13369769	A/chicken/England/59973/2021	Animal and Plant Health Agency (APHA)	Animal and Plant Health Agency (APHA)
EPI2071176	HA	United Kingdom	2021-Nov-16	EPI_ISL_13369759	A/chicken/England/058797/2021	Animal and Plant Health Agency (APHA)	Animal and Plant Health Agency (APHA)
EPI2071104	HA	United Kingdom	2021-Nov-12	EPI_ISL_13369746	A/chicken/England/057016/2021	Animal and Plant Health Agency (APHA)	Animal and Plant Health Agency (APHA)
EPI2071096	HA	United Kingdom	2021-Nov-10	EPI_ISL_13369745	A/chicken/England/056017/2021	Animal and Plant Health Agency (APHA)	Animal and Plant Health Agency (APHA)
EPI1963312	HA	United Kingdom	2021-Oct-24	EPI_ISL_9012457	A/chicken/England/053052/2021	Animal and Plant Health Agency (APHA)	Animal and Plant Health Agency (APHA)
EPI1937647	HA	Poland	2021-Nov-05	EPI_ISL_6931288	A/chicken/Poland/H1940-N/2021	National Veterinary Research Institut Poland, PIWet-PIB	National Veterinary Research Institut Poland, PIWet-PIB	E. Swieton, K. Smietanka
EPI2150886	HA	Sweden	2022-Jun-30	EPI_ISL_14811931	A/Pigeon/Sweden/SVA220701SZ0238/FB002074/C-2022	Swedish Veterinary Agency (SVA)	Swedish Veterinary Agency (SVA)
EPI2669558	HA	Russian Federation	2022-Oct-09	EPI_ISL_18071580	A/goose/Magadan/2272-5/2022	Federal Centre for Animal Health (ARRIAH) OIE Regional Reference Laboratory	Federal Centre for Animal Health (ARRIAH)	N., Zinyakov; A., Kozlov; P., Zhestkov; A., Grekhneva; A., Andriyasov; E., Ovchinnikova; Z., Nikonova; D., Andreychuk; I., Chvala
EPI2277865	HA	United Kingdom	2022-Sep-22	EPI_ISL_16384139	A/domestic_goose/England/121576/2022	Animal and Plant Health Agency (APHA)	Animal and Plant Health Agency (APHA)
EPI1937639	HA	Poland	2021-Nov-03	EPI_ISL_6931008	A/domestic_goose/Poland/H1931-T1/2021	National Veterinary Research Institut Poland, PIWet-PIB	National Veterinary Research Institut Poland, PIWet-PIB	E. Swieton, K. Smietanka
EPI2794507	HA	Sweden	2023-Nov-02	EPI_ISL_18514134	A/whooper swan/Sweden/SVA231107SZ0379/FB004549/E-2023	Swedish Veterinary Agency (SVA)	Swedish Veterinary Agency (SVA)	"Siamak,Zohari"
EPI2351043	HA	Belgium	2022-Nov-02	EPI_ISL_16809999	A/Anser anser_domesticus/Belgium/12994_0002/2022	Sciensano - Animal Infectious Diseases	Sciensano, Department of Animal Infectious Diseases	Van Borm, Steven; Roupie, Virginie; Hostyn, Pierre; Lambrecht, Benedicte; Steensels, Mieke
EPI2071216	HA	United Kingdom	2021-Nov-19	EPI_ISL_13369764	A/domestic_goose/England/059141/2021	Animal and Plant Health Agency (APHA)	Animal and Plant Health Agency (APHA)
EPI2277937	HA	United Kingdom	2022-Nov-21	EPI_ISL_16384148	A/Turkey/England/156090/2022	Animal and Plant Health Agency (APHA)	Animal and Plant Health Agency (APHA)
EPI2277897	HA	United Kingdom	2022-Nov-19	EPI_ISL_16384143	A/Turkey/England/154210/2022	Animal and Plant Health Agency (APHA)	Animal and Plant Health Agency (APHA)
EPI2277841	HA	United Kingdom	2022-Oct-21	EPI_ISL_16384129	A/turkey/England/138376/2022	Animal and Plant Health Agency (APHA)	Animal and Plant Health Agency (APHA)
EPI2277833	HA	United Kingdom	2022-Oct-27	EPI_ISL_16384128	A/turkey/England/141610/2022	Animal and Plant Health Agency (APHA)	Animal and Plant Health Agency (APHA)
EPI2071896	HA	United Kingdom	2021-Dec-27	EPI_ISL_13370621	A/turkey/England/075992/2021	Animal and Plant Health Agency (APHA)	Animal and Plant Health Agency (APHA)
EPI2071888	HA	United Kingdom	2021-Dec-27	EPI_ISL_13370620	A/turkey/England/075922/2021	Animal and Plant Health Agency (APHA)	Animal and Plant Health Agency (APHA)
EPI2071656	HA	United Kingdom	2021-Dec-09	EPI_ISL_13370559	A/turkey/England/068583/2021	Animal and Plant Health Agency (APHA)	Animal and Plant Health Agency (APHA)
EPI2071624	HA	United Kingdom	2021-Dec-08	EPI_ISL_13370524	A/turkey/England/067429/2021	Animal and Plant Health Agency (APHA)	Animal and Plant Health Agency (APHA)
EPI2071520	HA	United Kingdom	2021-Dec-02	EPI_ISL_13370511	A/turkey/Wales/065047/2021	Animal and Plant Health Agency (APHA)	Animal and Plant Health Agency (APHA)
EPI2071488	HA	United Kingdom	2021-Dec-02	EPI_ISL_13370507	A/turkey/England/064661/2021	Animal and Plant Health Agency (APHA)	Animal and Plant Health Agency (APHA)
EPI2071360	HA	United Kingdom	2021-Nov-27	EPI_ISL_13369782	A/turkey/England/062369/2021	Animal and Plant Health Agency (APHA)	Animal and Plant Health Agency (APHA)
EPI2071272	HA	United Kingdom	2021-Nov-21	EPI_ISL_13369771	A/turkey/England/059870/2021	Animal and Plant Health Agency (APHA)	Animal and Plant Health Agency (APHA)
EPI2071248	HA	United Kingdom	2021-Nov-20	EPI_ISL_13369768	A/turkey/England/059498/2021	Animal and Plant Health Agency (APHA)	Animal and Plant Health Agency (APHA)
EPI2071240	HA	United Kingdom	2021-Nov-20	EPI_ISL_13369767	A/turkey/England/059407/2021	Animal and Plant Health Agency (APHA)	Animal and Plant Health Agency (APHA)
EPI2071208	HA	United Kingdom	2021-Nov-19	EPI_ISL_13369763	A/turkey/England/059231/2021	Animal and Plant Health Agency (APHA)	Animal and Plant Health Agency (APHA)
EPI1947444	HA	Netherlands	2021-Dec-20	EPI_ISL_7996371	A/turkey/Netherlands/21040980-001005/2021	Wageningen Bioveterinary Research	Wageningen Bioveterinary Research	Beerens, Nancy; Harders, Frank; Pritz-Verschuren, Sylvia; Roose, Marit; Venema, Sandra; Germeraad, Evelien; Engelsma, Marc; Heutink, Rene
EPI1937631	HA	Poland	2021-Nov-03	EPI_ISL_6930564	A/turkey/Poland/H1924-T1/2021	National Veterinary Research Institut Poland, PIWet-PIB	National Veterinary Research Institut Poland, PIWet-PIB	E. Swieton, K. Smietanka
EPI2791117	HA	Peru	2023-Sep-26	EPI_ISL_18497946	A/duck/Peru/LAM-INS-014/2023	Servicio Nacional de Sanidad Agraria del Perú - SENASA	Instituto Nacional de Salud Peru	Padilla-Rojas, Carlos; Sevilla-Castaneda, Luren; Hurtado-Vela, Carmen; Silva-Molina, Juana; Huarca-Balbin, Liliam; Lizarraga-Olivares, Wendy; Jimenez-Vasquez, Victor; Lope-Pari, Priscila; Guitierrez, Karina; Garcia, Cesar; Conza-Blanco, Lidia; Balbuena-Torres, Johanna
EPI1950431	HA	Korea, Republic of	2021-Nov-15	EPI_ISL_8405766	A/Common Teal/South Korea/W813/2021	Chungbuk National University	Chungbuk National University
EPI1950423	HA	Korea, Republic of	2021-Nov-15	EPI_ISL_8405663	A/Common Teal/South Korea/W812/2021	Chungbuk National University	Chungbuk National University
EPI1950415	HA	Korea, Republic of	2021-Nov-15	EPI_ISL_8405626	A/Common Teal/South Korea/W811/2021	Chungbuk National University	Chungbuk National University
EPI2413436	HA	Costa Rica	2023-Jan-26	EPI_ISL_16958548	A/falcon/Costa_Rica/INC-0001-D0377-23/2023	Servicio Nacional de Salud Animal (SENASA)	Inciensa, Investigación y Enseñanza en Nutrición y Salud	Bernal,Leon; Olga,Aguilar; Idania,Chacon; Guisella,Chaves; Hebleen,Brenes; Claudio,Soto-Garita; Dihala,Picado; Isabel,Abarca; Estela,Cordero; Adriana,Godinez; Melany,Calderon; Francisco,Duarte
EPI2560279	HA	Slovakia	2023-Jan-21	EPI_ISL_17679820	A/domestic_goose/Slovakia/140_23VIR1686-6/2023	State Veterinary Institute	Istituto Zooprofilattico Sperimentale Delle Venezie	Dirbakova, Z.; Tinak, M.; Pastori, A.; Zecchin, B.; Fusaro, A.; Schivo, A.; Salviato, A.; Palumbo, E.; Giussani, E.; Monne, I.; Terregino, C.
EPI2560183	HA	Spain	2022-Dec-15	EPI_ISL_17679808	A/barnacle_goose/Spain/4740-5_23VIR1687-3/2022	Laboratorio Central de Veterinaria	Istituto Zooprofilattico Sperimentale Delle Venezie	Ruano,M.J.; Rocha,A.; Sanchez,A.; Aguero,M.; Pastori, A.; Zecchin, B.; Fusaro, A.; Schivo, A.; Salviato, A.; Palumbo, E.; Giussani, E.; Monne, I.; Terregino, C.
EPI2560135	HA	Spain	2022-Dec-14	EPI_ISL_17679802	A/goose/Spain/4727-22_23VIR1687-1/2022	Laboratorio Central de Veterinaria	Istituto Zooprofilattico Sperimentale Delle Venezie	Ruano,M.J.; Rocha,A.; Sanchez,A.; Aguero,M.; Pastori, A.; Zecchin, B.; Fusaro, A.; Schivo, A.; Salviato, A.; Palumbo, E.; Giussani, E.; Monne, I.; Terregino, C.
EPI2560047	HA	Italy	2022-Nov-23	EPI_ISL_17679791	A/rural_goose/Italy/22VIR11820-5/2022	Istituto Zooprofilattico Sperimentale delle Venezie, EU/OIE/Reference Laboratory and FAO Reference Centre for AI and ND	Istituto Zooprofilattico Sperimentale Delle Venezie	Pastori, A.; Zecchin, B.; Fusaro, A.; Schivo, A.; Salviato, A.; Palumbo, E.; Giussani, E.; Monne, I.; Terregino, C.
EPI2352706	HA	United Kingdom	2022-Dec-29	EPI_ISL_16811205	A/Pink-Footed_Goose/England/120645/2022	Animal and Plant Health Agency (APHA)	Animal and Plant Health Agency (APHA)
EPI2352681	HA	United Kingdom	2022-Dec-30	EPI_ISL_16811201	A/Greylag_Goose/England/120696/2022	Animal and Plant Health Agency (APHA)	Animal and Plant Health Agency (APHA)
EPI2352633	HA	United Kingdom	2023-Jan-06	EPI_ISL_16811195	A/barnacle_goose/Scotland/008625/2023	Animal and Plant Health Agency (APHA)	Animal and Plant Health Agency (APHA)
EPI1965213	HA	Netherlands	2022-Jan-06	EPI_ISL_9111095	A/goose/Netherlands/22000487-001/2022	Wageningen Bioveterinary Research	Wageningen Bioveterinary Research	Beerens, Nancy; Harders, Frank; Pritz-Verschuren, Sylvia; Roose, Marit; Venema, Sandra; Germeraad, Evelien; Engelsma, Marc; Heutink, Rene
EPI2072024	HA	Isle of Man	2022-Jan-14	EPI_ISL_13370693	A/Greylag_goose/Isle_of_Man/010298/2022	Animal and Plant Health Agency (APHA)	Animal and Plant Health Agency (APHA)
EPI1963384	HA	United Kingdom	2021-Nov-01	EPI_ISL_9012694	A/guineafowl/Scotland/054471/2021	Animal and Plant Health Agency (APHA)	Animal and Plant Health Agency (APHA)
EPI2560207	HA	Spain	2023-Jan-31	EPI_ISL_17679811	A/black-headead_gull/Spain/512-7_23VIR1687-7/2023	Laboratorio Central de Veterinaria	Istituto Zooprofilattico Sperimentale Delle Venezie	Ruano,M.J.; Rocha,A.; Sanchez,A.; Aguero,M.; Pastori, A.; Zecchin, B.; Fusaro, A.; Schivo, A.; Salviato, A.; Palumbo, E.; Giussani, E.; Monne, I.; Terregino, C.
EPI2560199	HA	Spain	2023-Jan-16	EPI_ISL_17679810	A/black-headead_gull/Spain/416-11_23VIR1687-6/2023	Laboratorio Central de Veterinaria	Istituto Zooprofilattico Sperimentale Delle Venezie	Ruano,M.J.; Rocha,A.; Sanchez,A.; Aguero,M.; Pastori, A.; Zecchin, B.; Fusaro, A.; Schivo, A.; Salviato, A.; Palumbo, E.; Giussani, E.; Monne, I.; Terregino, C.
EPI2560175	HA	Spain	2023-Feb-10	EPI_ISL_17679807	A/black-headead_gull/Spain/840-3_23VIR1687-25/2023	Laboratorio Central de Veterinaria	Istituto Zooprofilattico Sperimentale Delle Venezie	Ruano,M.J.; Rocha,A.; Sanchez,A.; Aguero,M.; Pastori, A.; Zecchin, B.; Fusaro, A.; Schivo, A.; Salviato, A.; Palumbo, E.; Giussani, E.; Monne, I.; Terregino, C.
EPI2560167	HA	Spain	2023-Feb-09	EPI_ISL_17679806	A/black-headead_gull/Spain/824-9_23VIR1687-24/2023	Laboratorio Central de Veterinaria	Istituto Zooprofilattico Sperimentale Delle Venezie	Ruano,M.J.; Rocha,A.; Sanchez,A.; Aguero,M.; Pastori, A.; Zecchin, B.; Fusaro, A.; Schivo, A.; Salviato, A.; Palumbo, E.; Giussani, E.; Monne, I.; Terregino, C.
EPI2560143	HA	Spain	2023-Jan-09	EPI_ISL_17679803	A/black-headead_gull/Spain/171-1_23VIR1687-20/2023	Laboratorio Central de Veterinaria	Istituto Zooprofilattico Sperimentale Delle Venezie	Ruano,M.J.; Rocha,A.; Sanchez,A.; Aguero,M.; Pastori, A.; Zecchin, B.; Fusaro, A.; Schivo, A.; Salviato, A.; Palumbo, E.; Giussani, E.; Monne, I.; Terregino, C.
EPI2559967	HA	Italy	2023-Jan-31	EPI_ISL_17679781	A/black-headed_gull/Italy/23VIR1109-4/2023	Istituto Zooprofilattico Sperimentale delle Venezie, EU/OIE/Reference Laboratory and FAO Reference Centre for AI and ND	Istituto Zooprofilattico Sperimentale Delle Venezie	Pastori, A.; Zecchin, B.; Fusaro, A.; Schivo, A.; Salviato, A.; Palumbo, E.; Giussani, E.; Monne, I.; Terregino, C.
EPI2559951	HA	Italy	2023-Jan-24	EPI_ISL_17679779	A/black-headed_gull/Italy/23VIR1104-4/2023	Istituto Zooprofilattico Sperimentale delle Venezie, EU/OIE/Reference Laboratory and FAO Reference Centre for AI and ND	Istituto Zooprofilattico Sperimentale Delle Venezie	Pastori, A.; Zecchin, B.; Fusaro, A.; Schivo, A.; Salviato, A.; Palumbo, E.; Giussani, E.; Monne, I.; Terregino, C.
EPI2559943	HA	Italy	2023-Jan-31	EPI_ISL_17679778	A/black-headed_gull/Italy/23VIR1103-4/2023	Istituto Zooprofilattico Sperimentale delle Venezie, EU/OIE/Reference Laboratory and FAO Reference Centre for AI and ND	Istituto Zooprofilattico Sperimentale Delle Venezie	Pastori, A.; Zecchin, B.; Fusaro, A.; Schivo, A.; Salviato, A.; Palumbo, E.; Giussani, E.; Monne, I.; Terregino, C.
EPI2559935	HA	Italy	2023-Jan-24	EPI_ISL_17679777	A/black-headed_gull/Italy/23VIR1100-4/2023	Istituto Zooprofilattico Sperimentale delle Venezie, EU/OIE/Reference Laboratory and FAO Reference Centre for AI and ND	Istituto Zooprofilattico Sperimentale Delle Venezie	Pastori, A.; Zecchin, B.; Fusaro, A.; Schivo, A.; Salviato, A.; Palumbo, E.; Giussani, E.; Monne, I.; Terregino, C.
EPI2559919	HA	Italy	2023-Feb-15	EPI_ISL_17679775	A/black-headed_gull/Italy/23VIR1310-3/2023	Istituto Zooprofilattico Sperimentale delle Venezie, EU/OIE/Reference Laboratory and FAO Reference Centre for AI and ND	Istituto Zooprofilattico Sperimentale Delle Venezie	Pastori, A.; Zecchin, B.; Fusaro, A.; Schivo, A.; Salviato, A.; Palumbo, E.; Giussani, E.; Monne, I.; Terregino, C.
EPI2559911	HA	Italy	2023-Feb-14	EPI_ISL_17679774	A/black-headed_gull/Italy/23VIR1249-2/2023	Istituto Zooprofilattico Sperimentale delle Venezie, EU/OIE/Reference Laboratory and FAO Reference Centre for AI and ND	Istituto Zooprofilattico Sperimentale Delle Venezie	Pastori, A.; Zecchin, B.; Fusaro, A.; Schivo, A.; Salviato, A.; Palumbo, E.; Giussani, E.; Monne, I.; Terregino, C.
EPI2559903	HA	Italy	2023-Feb-02	EPI_ISL_17679773	A/black-headed_gull/Italy/23VIR1205-2/2023	Istituto Zooprofilattico Sperimentale delle Venezie, EU/OIE/Reference Laboratory and FAO Reference Centre for AI and ND	Istituto Zooprofilattico Sperimentale Delle Venezie	Pastori, A.; Zecchin, B.; Fusaro, A.; Schivo, A.; Salviato, A.; Palumbo, E.; Giussani, E.; Monne, I.; Terregino, C.
EPI2559895	HA	Italy	2023-Feb-12	EPI_ISL_17679772	A/black-headed_gull/Italy/23VIR1204-1/2023	Istituto Zooprofilattico Sperimentale delle Venezie, EU/OIE/Reference Laboratory and FAO Reference Centre for AI and ND	Istituto Zooprofilattico Sperimentale Delle Venezie	Pastori, A.; Zecchin, B.; Fusaro, A.; Schivo, A.; Salviato, A.; Palumbo, E.; Giussani, E.; Monne, I.; Terregino, C.
EPI2559887	HA	Italy	2023-Feb-10	EPI_ISL_17679771	A/black-headed_gull/Italy/23VIR1203-9/2023	Istituto Zooprofilattico Sperimentale delle Venezie, EU/OIE/Reference Laboratory and FAO Reference Centre for AI and ND	Istituto Zooprofilattico Sperimentale Delle Venezie	Pastori, A.; Zecchin, B.; Fusaro, A.; Schivo, A.; Salviato, A.; Palumbo, E.; Giussani, E.; Monne, I.; Terregino, C.
EPI2559879	HA	Italy	2023-Feb-10	EPI_ISL_17679770	A/black-headed_gull/Italy/23VIR1203-8/2023	Istituto Zooprofilattico Sperimentale delle Venezie, EU/OIE/Reference Laboratory and FAO Reference Centre for AI and ND	Istituto Zooprofilattico Sperimentale Delle Venezie	Pastori, A.; Zecchin, B.; Fusaro, A.; Schivo, A.; Salviato, A.; Palumbo, E.; Giussani, E.; Monne, I.; Terregino, C.
EPI2559871	HA	Italy	2023-Feb-10	EPI_ISL_17679769	A/black-headed_gull/Italy/23VIR1203-7/2023	Istituto Zooprofilattico Sperimentale delle Venezie, EU/OIE/Reference Laboratory and FAO Reference Centre for AI and ND	Istituto Zooprofilattico Sperimentale Delle Venezie	Pastori, A.; Zecchin, B.; Fusaro, A.; Schivo, A.; Salviato, A.; Palumbo, E.; Giussani, E.; Monne, I.; Terregino, C.
EPI2559863	HA	Italy	2023-Feb-10	EPI_ISL_17679768	A/black-headed_gull/Italy/23VIR1203-6/2023	Istituto Zooprofilattico Sperimentale delle Venezie, EU/OIE/Reference Laboratory and FAO Reference Centre for AI and ND	Istituto Zooprofilattico Sperimentale Delle Venezie	Pastori, A.; Zecchin, B.; Fusaro, A.; Schivo, A.; Salviato, A.; Palumbo, E.; Giussani, E.; Monne, I.; Terregino, C.
EPI2559855	HA	Italy	2023-Feb-10	EPI_ISL_17679767	A/black-headed_gull/Italy/23VIR1203-5/2023	Istituto Zooprofilattico Sperimentale delle Venezie, EU/OIE/Reference Laboratory and FAO Reference Centre for AI and ND	Istituto Zooprofilattico Sperimentale Delle Venezie	Pastori, A.; Zecchin, B.; Fusaro, A.; Schivo, A.; Salviato, A.; Palumbo, E.; Giussani, E.; Monne, I.; Terregino, C.
EPI2559847	HA	Italy	2023-Feb-10	EPI_ISL_17679766	A/black-headed_gull/Italy/23VIR1203-4/2023	Istituto Zooprofilattico Sperimentale delle Venezie, EU/OIE/Reference Laboratory and FAO Reference Centre for AI and ND	Istituto Zooprofilattico Sperimentale Delle Venezie	Pastori, A.; Zecchin, B.; Fusaro, A.; Schivo, A.; Salviato, A.; Palumbo, E.; Giussani, E.; Monne, I.; Terregino, C.
EPI2559839	HA	Italy	2023-Feb-10	EPI_ISL_17679765	A/black-headed_gull/Italy/23VIR1203-3/2023	Istituto Zooprofilattico Sperimentale delle Venezie, EU/OIE/Reference Laboratory and FAO Reference Centre for AI and ND	Istituto Zooprofilattico Sperimentale Delle Venezie	Pastori, A.; Zecchin, B.; Fusaro, A.; Schivo, A.; Salviato, A.; Palumbo, E.; Giussani, E.; Monne, I.; Terregino, C.
EPI2559831	HA	Italy	2023-Feb-10	EPI_ISL_17679764	A/black-headed_gull/Italy/23VIR1203-2/2023	Istituto Zooprofilattico Sperimentale delle Venezie, EU/OIE/Reference Laboratory and FAO Reference Centre for AI and ND	Istituto Zooprofilattico Sperimentale Delle Venezie	Pastori, A.; Zecchin, B.; Fusaro, A.; Schivo, A.; Salviato, A.; Palumbo, E.; Giussani, E.; Monne, I.; Terregino, C.
EPI2559823	HA	Italy	2023-Feb-10	EPI_ISL_17679763	A/black-headed_gull/Italy/23VIR1203-1/2023	Istituto Zooprofilattico Sperimentale delle Venezie, EU/OIE/Reference Laboratory and FAO Reference Centre for AI and ND	Istituto Zooprofilattico Sperimentale Delle Venezie	Pastori, A.; Zecchin, B.; Fusaro, A.; Schivo, A.; Salviato, A.; Palumbo, E.; Giussani, E.; Monne, I.; Terregino, C.
EPI2559815	HA	Italy	2023-Feb-23	EPI_ISL_17679762	A/black-headed_gull/Italy/23VIR1613-6/2023	Istituto Zooprofilattico Sperimentale delle Venezie, EU/OIE/Reference Laboratory and FAO Reference Centre for AI and ND	Istituto Zooprofilattico Sperimentale Delle Venezie	Pastori, A.; Zecchin, B.; Fusaro, A.; Schivo, A.; Salviato, A.; Palumbo, E.; Giussani, E.; Monne, I.; Terregino, C.
EPI2559807	HA	Italy	2023-Feb-22	EPI_ISL_17679761	A/black-headed_gull/Italy/23VIR1516-2/2023	Istituto Zooprofilattico Sperimentale delle Venezie, EU/OIE/Reference Laboratory and FAO Reference Centre for AI and ND	Istituto Zooprofilattico Sperimentale Delle Venezie	Pastori, A.; Zecchin, B.; Fusaro, A.; Schivo, A.; Salviato, A.; Palumbo, E.; Giussani, E.; Monne, I.; Terregino, C.
EPI2559799	HA	Italy	2023-Feb-22	EPI_ISL_17679760	A/black-headed_gull/Italy/23VIR1515-2/2023	Istituto Zooprofilattico Sperimentale delle Venezie, EU/OIE/Reference Laboratory and FAO Reference Centre for AI and ND	Istituto Zooprofilattico Sperimentale Delle Venezie	Pastori, A.; Zecchin, B.; Fusaro, A.; Schivo, A.; Salviato, A.; Palumbo, E.; Giussani, E.; Monne, I.; Terregino, C.
EPI2559727	HA	Italy	2023-Feb-23	EPI_ISL_17679751	A/black-headead_gull/Italy/23VIR1659-4/2023	Istituto Zooprofilattico Sperimentale delle Venezie, EU/OIE/Reference Laboratory and FAO Reference Centre for AI and ND	Istituto Zooprofilattico Sperimentale Delle Venezie	Pastori, A.; Zecchin, B.; Fusaro, A.; Schivo, A.; Salviato, A.; Palumbo, E.; Giussani, E.; Monne, I.; Terregino, C.
EPI2559719	HA	Italy	2023-Feb-20	EPI_ISL_17679750	A/black-headead_gull/Italy/23VIR1658-4/2023	Istituto Zooprofilattico Sperimentale delle Venezie, EU/OIE/Reference Laboratory and FAO Reference Centre for AI and ND	Istituto Zooprofilattico Sperimentale Delle Venezie	Pastori, A.; Zecchin, B.; Fusaro, A.; Schivo, A.; Salviato, A.; Palumbo, E.; Giussani, E.; Monne, I.; Terregino, C.
EPI2559695	HA	Italy	2023-Mar-13	EPI_ISL_17679747	A/black-headed_gull/Italy/23VIR2383-2/2023	Istituto Zooprofilattico Sperimentale delle Venezie, EU/OIE/Reference Laboratory and FAO Reference Centre for AI and ND	Istituto Zooprofilattico Sperimentale Delle Venezie	Pastori, A.; Zecchin, B.; Fusaro, A.; Schivo, A.; Salviato, A.; Palumbo, E.; Giussani, E.; Monne, I.; Terregino, C.
EPI2559679	HA	Italy	2023-Mar-13	EPI_ISL_17679745	A/black-headed_gull/Italy/23VIR2235-3/2023	Istituto Zooprofilattico Sperimentale delle Venezie, EU/OIE/Reference Laboratory and FAO Reference Centre for AI and ND	Istituto Zooprofilattico Sperimentale Delle Venezie	Pastori, A.; Zecchin, B.; Fusaro, A.; Schivo, A.; Salviato, A.; Palumbo, E.; Giussani, E.; Monne, I.; Terregino, C.
EPI2559671	HA	Italy	2023-Mar-13	EPI_ISL_17679744	A/yellow-legged_gull/Italy/23VIR2234-2/2023	Istituto Zooprofilattico Sperimentale delle Venezie, EU/OIE/Reference Laboratory and FAO Reference Centre for AI and ND	Istituto Zooprofilattico Sperimentale Delle Venezie	Pastori, A.; Zecchin, B.; Fusaro, A.; Schivo, A.; Salviato, A.; Palumbo, E.; Giussani, E.; Monne, I.; Terregino, C.
EPI1958441	HA	Netherlands	2021-Dec-24	EPI_ISL_8799317	A/seagull/Netherlands/21041370-001/2021	Wageningen Bioveterinary Research	Wageningen Bioveterinary Research	Beerens, Nancy; Harders, Frank; Pritz-Verschuren, Sylvia; Roose, Marit; Venema, Sandra; Germeraad, Evelien; Engelsma, Marc; Heutink, Rene
EPI2068960	HA	Sweden	2022-Apr-29	EPI_ISL_13338018	A/European herring gull/Sweden/SVA220422SZ0382/FB001241/G-2022	Swedish Veterinary Agency (SVA)	Swedish Veterinary Agency (SVA)
EPI1994334	HA	Sweden	2021-Dec-21	EPI_ISL_10880515	A/European Herring Gull/ Sweden/SVA211221SZ0503/FB004873/M-2021	Swedish Veterinary Agency (SVA)	Swedish Veterinary Agency (SVA)
EPI2072008	HA	United Kingdom	2022-Jan-08	EPI_ISL_13370679	A/common_gull/England/245481/2022	Animal and Plant Health Agency (APHA)	Animal and Plant Health Agency (APHA)
EPI1982835	HA	Sweden	2021-Dec-21	EPI_ISL_9651560	A/great black-backed gull/Sweden/SVA211221SZ0509/FB004872/2021	Swedish Veterinary Agency (SVA)	Swedish Veterinary Agency (SVA)
EPI1963320	HA	United Kingdom	2021-Oct-27	EPI_ISL_9012572	A/pheasant/Wales/385129/2021	Animal and Plant Health Agency (APHA)	Animal and Plant Health Agency (APHA)
EPI2560271	HA	Slovakia	2023-Jan-20	EPI_ISL_17679819	A/mute_swan/Slovakia/139_23VIR1686-5/2023	State Veterinary Institute	Istituto Zooprofilattico Sperimentale Delle Venezie	Dirbakova, Z.; Tinak, M.; Pastori, A.; Zecchin, B.; Fusaro, A.; Schivo, A.; Salviato, A.; Palumbo, E.; Giussani, E.; Monne, I.; Terregino, C.
EPI2560263	HA	Slovakia	2023-Jan-17	EPI_ISL_17679818	A/mute_swan/Slovakia/51_23VIR1686-4/2023	State Veterinary Institute	Istituto Zooprofilattico Sperimentale Delle Venezie	Dirbakova, Z.; Tinak, M.; Pastori, A.; Zecchin, B.; Fusaro, A.; Schivo, A.; Salviato, A.; Palumbo, E.; Giussani, E.; Monne, I.; Terregino, C.
EPI2560071	HA	Slovenia	2023-Feb-02	EPI_ISL_17679794	A/black_swan/Slovenia/137_23VIR1977-5/2023	University of Ljubljana	Istituto Zooprofilattico Sperimentale Delle Venezie	Slavec, B.; Kvapil, P.; Paller, T.; Pastori, A.; Zecchin, B.; Fusaro, A.; Schivo, A.; Salviato, A.; Palumbo, E.; Giussani, E.; Monne, I.; Terregino, C.
EPI2560055	HA	Slovenia	2023-Jan-04	EPI_ISL_17679792	A/mute_swan/Slovenia/6_23VIR1977-3/2023	University of Ljubljana	Istituto Zooprofilattico Sperimentale Delle Venezie	Slavec, B.; Kvapil, P.; Paller, T.; Pastori, A.; Zecchin, B.; Fusaro, A.; Schivo, A.; Salviato, A.; Palumbo, E.; Giussani, E.; Monne, I.; Terregino, C.
EPI2559975	HA	Italy	2023-Jan-19	EPI_ISL_17679782	A/swan/Italy/23VIR682-2/2023	Istituto Zooprofilattico Sperimentale delle Venezie, EU/OIE/Reference Laboratory and FAO Reference Centre for AI and ND	Istituto Zooprofilattico Sperimentale Delle Venezie	Pastori, A.; Zecchin, B.; Fusaro, A.; Schivo, A.; Salviato, A.; Palumbo, E.; Giussani, E.; Monne, I.; Terregino, C.
EPI2559927	HA	Italy	2023-Feb-02	EPI_ISL_17679776	A/swan/Italy/23VIR1077-2/2023	Istituto Zooprofilattico Sperimentale delle Venezie, EU/OIE/Reference Laboratory and FAO Reference Centre for AI and ND	Istituto Zooprofilattico Sperimentale Delle Venezie	Pastori, A.; Zecchin, B.; Fusaro, A.; Schivo, A.; Salviato, A.; Palumbo, E.; Giussani, E.; Monne, I.; Terregino, C.
EPI2071920	HA	United Kingdom	2021-Dec-29	EPI_ISL_13370624	A/Whooper_swan/England/000556/2021	Animal and Plant Health Agency (APHA)	Animal and Plant Health Agency (APHA)
EPI2072224	HA	United Kingdom	2022-Mar-07	EPI_ISL_13370908	A/mute_swan/Scotland/029919/2022	Animal and Plant Health Agency (APHA)	Animal and Plant Health Agency (APHA)
EPI2072216	HA	United Kingdom	2022-Mar-07	EPI_ISL_13370907	A/mute_swan/Scotland/029918/2022	Animal and Plant Health Agency (APHA)	Animal and Plant Health Agency (APHA)
EPI2071952	HA	United Kingdom	2021-Dec-31	EPI_ISL_13370628	A/mute_swan/England/244639/2021	Animal and Plant Health Agency (APHA)	Animal and Plant Health Agency (APHA)
EPI2071944	HA	United Kingdom	2021-Dec-31	EPI_ISL_13370627	A/mute_swan/England/000030/2021	Animal and Plant Health Agency (APHA)	Animal and Plant Health Agency (APHA)
EPI2071416	HA	United Kingdom	2021-Nov-29	EPI_ISL_13370415	A/mute_swan/Northern_Ireland/17269/2021	Animal and Plant Health Agency (APHA)	Animal and Plant Health Agency (APHA)
EPI1950865	HA	Croatia	2021-Dec-29	EPI_ISL_8439476	A/mute swan/Croatia/146/2021	Croatian Veterinary Institute, Poultry Centre	Croatian Veterinary Institute	Savić, Vladimir; Pastori, Ambra; Zecchin, Bianca; Fusaro, Alice; Schivo, Alessia; Salviato, Annalisa; Palumbo, Elisa; Giussani, Edoardo; Monne, Isabella; Terregino, Calogero
EPI1941530	HA	Croatia	2021-Nov-12	EPI_ISL_7357590	A/mute swan/Croatia/101/2021	Croatian Veterinary Institute, Poultry Centre	Croatian Veterinary Institute	Savić, Vladimir
EPI2560215	HA	Spain	2023-Feb-07	EPI_ISL_17679812	A/turkey/Spain/613-57_23VIR1687-9/2023	Laboratorio Central de Veterinaria	Istituto Zooprofilattico Sperimentale Delle Venezie	Ruano,M.J.; Rocha,A.; Sanchez,A.; Aguero,M.; Pastori, A.; Zecchin, B.; Fusaro, A.; Schivo, A.; Salviato, A.; Palumbo, E.; Giussani, E.; Monne, I.; Terregino, C.
EPI2560159	HA	Spain	2023-Feb-07	EPI_ISL_17679805	A/turkey/Spain/613-56_23VIR1687-22/2023	Laboratorio Central de Veterinaria	Istituto Zooprofilattico Sperimentale Delle Venezie	Ruano,M.J.; Rocha,A.; Sanchez,A.; Aguero,M.; Pastori, A.; Zecchin, B.; Fusaro, A.; Schivo, A.; Salviato, A.; Palumbo, E.; Giussani, E.; Monne, I.; Terregino, C.
EPI2560007	HA	Italy	2022-Nov-03	EPI_ISL_17679786	A/rural_turkey/Italy/22VIR10636-5/2022	Istituto Zooprofilattico Sperimentale delle Venezie, EU/OIE/Reference Laboratory and FAO Reference Centre for AI and ND	Istituto Zooprofilattico Sperimentale Delle Venezie	Pastori, A.; Zecchin, B.; Fusaro, A.; Schivo, A.; Salviato, A.; Palumbo, E.; Giussani, E.; Monne, I.; Terregino, C.
EPI2559983	HA	Italy	2022-Dec-22	EPI_ISL_17679783	A/turkey/Italy/22VIR12938-3/2022	Istituto Zooprofilattico Sperimentale delle Venezie, EU/OIE/Reference Laboratory and FAO Reference Centre for AI and ND	Istituto Zooprofilattico Sperimentale Delle Venezie	Pastori, A.; Zecchin, B.; Fusaro, A.; Schivo, A.; Salviato, A.; Palumbo, E.; Giussani, E.; Monne, I.; Terregino, C.
EPI2352617	HA	United Kingdom	2023-Jan-11	EPI_ISL_16811193	A/turkey/England/006957/2023	Animal and Plant Health Agency (APHA)	Animal and Plant Health Agency (APHA)
EPI2352585	HA	United Kingdom	2023-Jan-11	EPI_ISL_16811189	A/turkey/England/006787/2023	Animal and Plant Health Agency (APHA)	Animal and Plant Health Agency (APHA)
EPI2352555	HA	United Kingdom	2023-Jan-09	EPI_ISL_16811185	A/turkey/England/005293/2023	Animal and Plant Health Agency (APHA)	Animal and Plant Health Agency (APHA)
EPI1962033	HA	Italy	2021-Dec-06	EPI_ISL_8882172	A/turkey/Italy/21VIR10851/2021	Istituto Zooprofilattico Sperimentale delle Venezie, EU/OIE/Reference Laboratory and FAO Reference Centre for AI and ND	Istituto Zooprofilattico Sperimentale delle Venezie	Barbierato, G.; Zecchin, B.; Fusaro, A.; Schivo, A.; Salviato, A.; Palumbo, E.; Giussani, E.; Monne, I.; Terregino, C.
EPI1962025	HA	Italy	2021-Dec-23	EPI_ISL_8882171	A/turkey/Italy/21VIR11591-8/2021	Istituto Zooprofilattico Sperimentale delle Venezie, EU/OIE/Reference Laboratory and FAO Reference Centre for AI and ND	Istituto Zooprofilattico Sperimentale delle Venezie	Barbierato, G.; Zecchin, B.; Fusaro, A.; Schivo, A.; Salviato, A.; Palumbo, E.; Giussani, E.; Monne, I.; Terregino, C.
EPI1962017	HA	Italy	2021-Dec-29	EPI_ISL_8882170	A/turkey/Italy/21VIR11887-3/2021	Istituto Zooprofilattico Sperimentale delle Venezie, EU/OIE/Reference Laboratory and FAO Reference Centre for AI and ND	Istituto Zooprofilattico Sperimentale delle Venezie	Barbierato, G.; Zecchin, B.; Fusaro, A.; Schivo, A.; Salviato, A.; Palumbo, E.; Giussani, E.; Monne, I.; Terregino, C.
EPI1961993	HA	Italy	2021-Dec-27	EPI_ISL_8882167	A/turkey/Italy/21VIR11804-1/2021	Istituto Zooprofilattico Sperimentale delle Venezie, EU/OIE/Reference Laboratory and FAO Reference Centre for AI and ND	Istituto Zooprofilattico Sperimentale delle Venezie	Barbierato, G.; Zecchin, B.; Fusaro, A.; Schivo, A.; Salviato, A.; Palumbo, E.; Giussani, E.; Monne, I.; Terregino, C.
EPI1961985	HA	Italy	2021-Dec-23	EPI_ISL_8882166	A/turkey/Italy/21VIR11586-2/2021	Istituto Zooprofilattico Sperimentale delle Venezie, EU/OIE/Reference Laboratory and FAO Reference Centre for AI and ND	Istituto Zooprofilattico Sperimentale delle Venezie	Barbierato, G.; Zecchin, B.; Fusaro, A.; Schivo, A.; Salviato, A.; Palumbo, E.; Giussani, E.; Monne, I.; Terregino, C.
EPI1943844	HA	Germany	2021-May-03	EPI_ISL_5146481	A/turkey/Germany-NI/AI04425/2021	Lebensmittel- und Veterinärinstitut Oldenburg - Standort Veterinärinstitut	Friedrich-Loeffler-Institut
EPI2750962	HA	Netherlands	2023-May-26	EPI_ISL_18286219	A/Sandwich Tern/Netherlands/23009152-001/2023	Wageningen Bioveterinary Research	Wageningen Bioveterinary Research	Beerens, Nancy; Harders, Frank; Pritz-Verschuren, Sylvia; Roose, Marit; Venema, Sandra; Germeraad, Evelien; Engelsma, Marc; Heutink, Rene
EPI2560191	HA	Spain	2023-Jan-03	EPI_ISL_17679809	A/common_buzzard/Spain/88-1_23VIR1687-5/2023	Laboratorio Central de Veterinaria	Istituto Zooprofilattico Sperimentale Delle Venezie	Ruano,M.J.; Rocha,A.; Sanchez,A.; Aguero,M.; Pastori, A.; Zecchin, B.; Fusaro, A.; Schivo, A.; Salviato, A.; Palumbo, E.; Giussani, E.; Monne, I.; Terregino, C.
EPI2560151	HA	Spain	2023-Jan-20	EPI_ISL_17679804	A/seagull/Spain/298-46_23VIR1687-21/2023	Laboratorio Central de Veterinaria	Istituto Zooprofilattico Sperimentale Delle Venezie	Ruano,M.J.; Rocha,A.; Sanchez,A.; Aguero,M.; Pastori, A.; Zecchin, B.; Fusaro, A.; Schivo, A.; Salviato, A.; Palumbo, E.; Giussani, E.; Monne, I.; Terregino, C.
EPI2560127	HA	Spain	2022-Dec-25	EPI_ISL_17679801	A/seagull/Spain/4878-10_23VIR1687-18/2022	Laboratorio Central de Veterinaria	Istituto Zooprofilattico Sperimentale Delle Venezie	Ruano,M.J.; Rocha,A.; Sanchez,A.; Aguero,M.; Pastori, A.; Zecchin, B.; Fusaro, A.; Schivo, A.; Salviato, A.; Palumbo, E.; Giussani, E.; Monne, I.; Terregino, C.
EPI2560119	HA	Spain	2022-Dec-21	EPI_ISL_17679800	A/seagull/Spain/4878-9_23VIR1687-17/2022	Laboratorio Central de Veterinaria	Istituto Zooprofilattico Sperimentale Delle Venezie	Ruano,M.J.; Rocha,A.; Sanchez,A.; Aguero,M.; Pastori, A.; Zecchin, B.; Fusaro, A.; Schivo, A.; Salviato, A.; Palumbo, E.; Giussani, E.; Monne, I.; Terregino, C.
EPI2560095	HA	Spain	2022-Nov-08	EPI_ISL_17679797	A/gray_heron/Spain/4688-3_23VIR1687-13/2022	Laboratorio Central de Veterinaria	Istituto Zooprofilattico Sperimentale Delle Venezie	Ruano,M.J.; Rocha,A.; Sanchez,A.; Aguero,M.; Pastori, A.; Zecchin, B.; Fusaro, A.; Schivo, A.; Salviato, A.; Palumbo, E.; Giussani, E.; Monne, I.; Terregino, C.
EPI2560087	HA	Spain	2022-Dec-02	EPI_ISL_17679796	A/seagull/Spain/4621-1_23VIR1687-12/2022	Laboratorio Central de Veterinaria	Istituto Zooprofilattico Sperimentale Delle Venezie	Ruano,M.J.; Rocha,A.; Sanchez,A.; Aguero,M.; Pastori, A.; Zecchin, B.; Fusaro, A.; Schivo, A.; Salviato, A.; Palumbo, E.; Giussani, E.; Monne, I.; Terregino, C.
EPI2560079	HA	Slovenia	2023-Feb-02	EPI_ISL_17679795	A/Eurasian_eagle-owl/Slovenia/142_23VIR1977-6/2023	University of Ljubljana	Istituto Zooprofilattico Sperimentale Delle Venezie	Slavec, B.; Kvapil, P.; Paller, T.; Pastori, A.; Zecchin, B.; Fusaro, A.; Schivo, A.; Salviato, A.; Palumbo, E.; Giussani, E.; Monne, I.; Terregino, C.
EPI2560039	HA	Italy	2022-Oct-26	EPI_ISL_17679790	A/teal/Italy/22VIR10396-3/2022	Istituto Zooprofilattico Sperimentale delle Venezie, EU/OIE/Reference Laboratory and FAO Reference Centre for AI and ND	Istituto Zooprofilattico Sperimentale Delle Venezie	Pastori, A.; Zecchin, B.; Fusaro, A.; Schivo, A.; Salviato, A.; Palumbo, E.; Giussani, E.; Monne, I.; Terregino, C.
EPI2560031	HA	Italy	2022-Oct-26	EPI_ISL_17679789	A/teal/Italy/22VIR10396-2/2022	Istituto Zooprofilattico Sperimentale delle Venezie, EU/OIE/Reference Laboratory and FAO Reference Centre for AI and ND	Istituto Zooprofilattico Sperimentale Delle Venezie	Pastori, A.; Zecchin, B.; Fusaro, A.; Schivo, A.; Salviato, A.; Palumbo, E.; Giussani, E.; Monne, I.; Terregino, C.
EPI2559999	HA	Italy	2022-Nov-14	EPI_ISL_17679785	A/flamingo/Italy/22VIR11417-3/2022	Istituto Zooprofilattico Sperimentale delle Venezie, EU/OIE/Reference Laboratory and FAO Reference Centre for AI and ND	Istituto Zooprofilattico Sperimentale Delle Venezie	Pastori, A.; Zecchin, B.; Fusaro, A.; Schivo, A.; Salviato, A.; Palumbo, E.; Giussani, E.; Monne, I.; Terregino, C.
EPI2559991	HA	Italy	2022-Nov-29	EPI_ISL_17679784	A/guinea_fowl/Italy/22VIR12135-1/2022	Istituto Zooprofilattico Sperimentale delle Venezie, EU/OIE/Reference Laboratory and FAO Reference Centre for AI and ND	Istituto Zooprofilattico Sperimentale Delle Venezie	Pastori, A.; Zecchin, B.; Fusaro, A.; Schivo, A.; Salviato, A.; Palumbo, E.; Giussani, E.; Monne, I.; Terregino, C.
EPI2536750	HA	United Kingdom	2023-Mar-25	EPI_ISL_17564773	A/black-headed_gull/England/258811/2023	Animal and Plant Health Agency (APHA)	Animal and Plant Health Agency (APHA)
EPI2416456	HA	Netherlands	2023-Feb-06	EPI_ISL_17008431	A/White Stork/Netherlands/23002318-002/2023	Wageningen Bioveterinary Research	Wageningen Bioveterinary Research	Beerens, Nancy; Harders, Frank; Pritz-Verschuren, Sylvia; Roose, Marit; Venema, Sandra; Germeraad, Evelien; Engelsma, Marc; Heutink, Rene
EPI2352698	HA	United Kingdom	2022-Dec-31	EPI_ISL_16811204	A/Mute_Swan/England/120738/2022	Animal and Plant Health Agency (APHA)	Animal and Plant Health Agency (APHA)
EPI2352665	HA	United Kingdom	2022-Dec-30	EPI_ISL_16811199	A/Mute_Swan/England/120693/2022	Animal and Plant Health Agency (APHA)	Animal and Plant Health Agency (APHA)
EPI2296781	HA	Belgium	2022-Nov-21	EPI_ISL_16549245	A/Otus_scops/Belgium/13463-0002/2022	Sciensano - Animal Infectious Diseases	Sciensano, Department of Animal Infectious Diseases	Van Borm, Steven; Roupie, Virginie; Hostyn, Pierre; Lambrecht, Benedicte; Steensels, Mieke
EPI2208346	HA	Belgium	2022-Sep-18	EPI_ISL_15697406	A/Pavo/Belgium/10906_0006/2022	Sciensano - Animal Infectious Diseases	Sciensano, Department of Animal Infectious Diseases
EPI2072208	HA	Jersey	2022-Feb-22	EPI_ISL_13370897	A/Red-breasted_goose/Jersey/018414/2022	Animal and Plant Health Agency (APHA)	Animal and Plant Health Agency (APHA)
EPI2072200	HA	Jersey	2022-Feb-22	EPI_ISL_13370896	A/Red-breasted_goose/Jersey/018413/2022	Animal and Plant Health Agency (APHA)	Animal and Plant Health Agency (APHA)
EPI2072192	HA	United Kingdom	2022-Feb-05	EPI_ISL_13370895	A/magpie/Scotland/012805/2022	Animal and Plant Health Agency (APHA)	Animal and Plant Health Agency (APHA)
EPI2072184	HA	United Kingdom	2022-Jan-28	EPI_ISL_13370894	A/coot/England/388108/2022	Animal and Plant Health Agency (APHA)	Animal and Plant Health Agency (APHA)
EPI2072176	HA	United Kingdom	2021-Dec-24	EPI_ISL_13370893	A/Little_gull/England/109275/2021	Animal and Plant Health Agency (APHA)	Animal and Plant Health Agency (APHA)
EPI2072168	HA	United Kingdom	2021-Dec-03	EPI_ISL_13370892	A/Lapwing/England/067574/2021	Animal and Plant Health Agency (APHA)	Animal and Plant Health Agency (APHA)
EPI2021940	HA	Japan	2022-Mar-29	EPI_ISL_12174843	A/crow/Hokkaido/0103B065/2022	Graduate School of Veterinary Medicine, Hokkaido University	Graduate School of Veterinary Medicine, Hokkaido University	Yoshihiro, SAKODA; Takahiro, HIONO; Norikazu, ISODA
EPI1962041	HA	Italy	2021-Dec-21	EPI_ISL_8882173	A/laying_hen/Italy/21VIR11502/2021	Istituto Zooprofilattico Sperimentale delle Venezie, EU/OIE/Reference Laboratory and FAO Reference Centre for AI and ND	Istituto Zooprofilattico Sperimentale delle Venezie	Barbierato, G.; Zecchin, B.; Fusaro, A.; Schivo, A.; Salviato, A.; Palumbo, E.; Giussani, E.; Monne, I.; Terregino, C.
EPI1943854	HA	Germany	2021-Jul-17	EPI_ISL_5145744	A/oystercatcher/Germany-NI/AI05047/2021	Lebensmittel- und Veterinärinstitut Oldenburg - Standort Veterinärinstitut	Friedrich-Loeffler-Institut
EPI2892391	HA	Finland	2023-Jul-21	EPI_ISL_18728075	A/black-legged_kittiwake/Finland/8772/2023	Finnish Food Authority	Finnish Food Authority	Kauppinen, Ari; Kareinen, Lauri; Tammiranta, Niina; Kantala, Tuija; Fusaro, Alice; Giussani, Edoardo; Gadd, Tuija
EPI2869940	HA	United States	2023-Oct-15	EPI_ISL_18695308	A/turkey/South Dakota/23-031731-002/2023	National Veterinary Services Laboratories - USDA	National Veterinary Services Laboratories - USDA	Franzen,Kerrie;Love,Emily;Ozella,Mikaela;Killian,Mary;Lantz,Kristina;Stuber,Tod;Hicks,Jessica;Norris,Cameron
EPI2869932	HA	United States	2023-Oct-15	EPI_ISL_18695307	A/turkey/South Dakota/23-031731-001/2023	National Veterinary Services Laboratories - USDA	National Veterinary Services Laboratories - USDA	Franzen,Kerrie;Love,Emily;Ozella,Mikaela;Killian,Mary;Lantz,Kristina;Stuber,Tod;Hicks,Jessica;Norris,Cameron
EPI2869924	HA	United States	2023-Oct-17	EPI_ISL_18695306	A/turkey/Minnesota/23-031729-002/2023	National Veterinary Services Laboratories - USDA	National Veterinary Services Laboratories - USDA	Franzen,Kerrie;Love,Emily;Ozella,Mikaela;Killian,Mary;Lantz,Kristina;Stuber,Tod;Hicks,Jessica;Norris,Cameron
EPI2869916	HA	United States	2023-Oct-17	EPI_ISL_18695305	A/turkey/Minnesota/23-031729-001/2023	National Veterinary Services Laboratories - USDA	National Veterinary Services Laboratories - USDA	Franzen,Kerrie;Love,Emily;Ozella,Mikaela;Killian,Mary;Lantz,Kristina;Stuber,Tod;Hicks,Jessica;Norris,Cameron
EPI2869908	HA	United States	2023-Oct-16	EPI_ISL_18695304	A/domestic goose/Montana/23-031652-002/2023	National Veterinary Services Laboratories - USDA	National Veterinary Services Laboratories - USDA	Franzen,Kerrie;Love,Emily;Ozella,Mikaela;Killian,Mary;Lantz,Kristina;Stuber,Tod;Hicks,Jessica;Norris,Cameron
EPI2869900	HA	United States	2023-Oct-12	EPI_ISL_18695303	A/sharp-shinned hawk/Iowa/23-031647-001/2023	National Veterinary Services Laboratories - USDA	National Veterinary Services Laboratories - USDA	Franzen,Kerrie;Love,Emily;Ozella,Mikaela;Killian,Mary;Lantz,Kristina;Stuber,Tod;Hicks,Jessica;Norris,Cameron
EPI2869892	HA	United States	2023-Oct-16	EPI_ISL_18695302	A/turkey/Minnesota/23-031508-003/2023	National Veterinary Services Laboratories - USDA	National Veterinary Services Laboratories - USDA	Franzen,Kerrie;Love,Emily;Ozella,Mikaela;Killian,Mary;Lantz,Kristina;Stuber,Tod;Hicks,Jessica;Norris,Cameron
EPI2869884	HA	United States	2023-Oct-16	EPI_ISL_18695301	A/turkey/Minnesota/23-031508-002/2023	National Veterinary Services Laboratories - USDA	National Veterinary Services Laboratories - USDA	Franzen,Kerrie;Love,Emily;Ozella,Mikaela;Killian,Mary;Lantz,Kristina;Stuber,Tod;Hicks,Jessica;Norris,Cameron
EPI2869876	HA	United States	2023-Oct-16	EPI_ISL_18695300	A/turkey/Minnesota/23-031508-001/2023	National Veterinary Services Laboratories - USDA	National Veterinary Services Laboratories - USDA	Franzen,Kerrie;Love,Emily;Ozella,Mikaela;Killian,Mary;Lantz,Kristina;Stuber,Tod;Hicks,Jessica;Norris,Cameron
EPI2869868	HA	United States	2023-Oct-11	EPI_ISL_18695299	A/Canada goose/Oregon/23-031492-001/2023	National Veterinary Services Laboratories - USDA	National Veterinary Services Laboratories - USDA	Franzen,Kerrie;Love,Emily;Ozella,Mikaela;Killian,Mary;Lantz,Kristina;Stuber,Tod;Hicks,Jessica;Norris,Cameron
EPI2869860	HA	United States	2023-Oct-11	EPI_ISL_18695298	A/Canada goose/Oregon/23-031491-001/2023	National Veterinary Services Laboratories - USDA	National Veterinary Services Laboratories - USDA	Franzen,Kerrie;Love,Emily;Ozella,Mikaela;Killian,Mary;Lantz,Kristina;Stuber,Tod;Hicks,Jessica;Norris,Cameron
EPI2869852	HA	United States	2023-Oct-16	EPI_ISL_18695297	A/turkey/Minnesota/23-031477-003/2023	National Veterinary Services Laboratories - USDA	National Veterinary Services Laboratories - USDA	Franzen,Kerrie;Love,Emily;Ozella,Mikaela;Killian,Mary;Lantz,Kristina;Stuber,Tod;Hicks,Jessica;Norris,Cameron
EPI2639304	HA	Japan	2023-Mar-24	EPI_ISL_18007232	A/large-billed crow/Niigata/1503B017/2023	Graduate School of Veterinary Medicine, Hokkaido University	Graduate School of Veterinary Medicine, Hokkaido University	Manabu, Onuma; Kei, Nabeshima; Atsushi, Haga; Hisako, Honjo; Misako, Yokoyama; Yoshihiro, Sakoda; Norikazu, Isoda; Takahiro, Hiono; Hew, Yik Lim
EPI2639296	HA	Japan	2023-Mar-15	EPI_ISL_18007231	A/large-billed crow/Akita/0503F012/2023	Graduate School of Veterinary Medicine, Hokkaido University	Graduate School of Veterinary Medicine, Hokkaido University	Manabu, Onuma; Kei, Nabeshima; Atsushi, Haga; Hisako, Honjo; Misako, Yokoyama; Yoshihiro, Sakoda; Norikazu, Isoda; Takahiro, Hiono; Hew, Yik Lim
EPI2639274	HA	Japan	2023-Apr-17	EPI_ISL_18007229	A/large-billed crow/Hokkaido/B052/2023	Graduate School of Veterinary Medicine, Hokkaido University	Graduate School of Veterinary Medicine, Hokkaido University	Yoshihiro, Sakoda; Norikazu, Isoda; Takahiro, Hiono; Hew, Yik Lim
EPI2352324	HA	Netherlands	2022-Dec-31	EPI_ISL_16811039	A/Peregrine falcon/Netherlands/1/2022	Erasmus Medical Center	Erasmus Medical Center
EPI2069014	HA	Sweden	2022-May-25	EPI_ISL_13338081	A/Northern gannet/Sweden/SVA220525SZ0402/FB001671/O-2022	Swedish Veterinary Agency (SVA)	Swedish Veterinary Agency (SVA)
EPI1963368	HA	Netherlands	2021-Dec-27	EPI_ISL_9012580	A/Mallard/Netherlands/15/2021	Erasmus Medical Center	Erasmus Medical Center
EPI1963360	HA	Netherlands	2021-Dec-27	EPI_ISL_9012578	A/Mallard/Netherlands/14/2021	Erasmus Medical Center	Erasmus Medical Center
EPI1963352	HA	Netherlands	2021-Dec-27	EPI_ISL_9012577	A/Mallard/Netherlands/13/2021	Erasmus Medical Center	Erasmus Medical Center
EPI1963328	HA	Netherlands	2021-Dec-17	EPI_ISL_9012574	A/Herring Gull/Netherlands/1/2021	Erasmus Medical Center	Erasmus Medical Center
EPI2560311	HA	Estonia	2023-Feb-15	EPI_ISL_17679824	A/chicken/Estonia/TA-2304130_23VIR3148-1/2023	Estonian Veterinary and Food Laboratory	Istituto Zooprofilattico Sperimentale Delle Venezie	Vilem, A.; Nurmoja, I., Pastori, A.; Zecchin, B.; Fusaro, A.; Schivo, A.; Salviato, A.; Palumbo, E.; Giussani, E.; Monne, I.; Terregino, C.
EPI2560303	HA	Slovakia	2023-Jan-27	EPI_ISL_17679823	A/chicken/Slovakia/145-brain_23VIR1686-9/2023	State Veterinary Institute	Istituto Zooprofilattico Sperimentale Delle Venezie	Dirbakova, Z.; Tinak, M.; Pastori, A.; Zecchin, B.; Fusaro, A.; Schivo, A.; Salviato, A.; Palumbo, E.; Giussani, E.; Monne, I.; Terregino, C.
EPI2560295	HA	Slovakia	2023-Jan-27	EPI_ISL_17679822	A/chicken/Slovakia/145-organs_23VIR1686-8/2023	State Veterinary Institute	Istituto Zooprofilattico Sperimentale Delle Venezie	Dirbakova, Z.; Tinak, M.; Pastori, A.; Zecchin, B.; Fusaro, A.; Schivo, A.; Salviato, A.; Palumbo, E.; Giussani, E.; Monne, I.; Terregino, C.
EPI2560287	HA	Slovakia	2023-Jan-27	EPI_ISL_17679821	A/chicken/Slovakia/145-swab_23VIR1686-7/2023	State Veterinary Institute	Istituto Zooprofilattico Sperimentale Delle Venezie	Dirbakova, Z.; Tinak, M.; Pastori, A.; Zecchin, B.; Fusaro, A.; Schivo, A.; Salviato, A.; Palumbo, E.; Giussani, E.; Monne, I.; Terregino, C.
EPI2560255	HA	Slovakia	2023-Jan-12	EPI_ISL_17679817	A/chicken/Slovakia/25-brain_23VIR1686-3/2023	State Veterinary Institute	Istituto Zooprofilattico Sperimentale Delle Venezie	Dirbakova, Z.; Tinak, M.; Pastori, A.; Zecchin, B.; Fusaro, A.; Schivo, A.; Salviato, A.; Palumbo, E.; Giussani, E.; Monne, I.; Terregino, C.
EPI2560247	HA	Slovakia	2023-Jan-12	EPI_ISL_17679816	A/chicken/Slovakia/25-organs_23VIR1686-2/2023	State Veterinary Institute	Istituto Zooprofilattico Sperimentale Delle Venezie	Dirbakova, Z.; Tinak, M.; Pastori, A.; Zecchin, B.; Fusaro, A.; Schivo, A.; Salviato, A.; Palumbo, E.; Giussani, E.; Monne, I.; Terregino, C.
EPI2560239	HA	Slovakia	2023-Jan-12	EPI_ISL_17679815	A/chicken/Slovakia/25-swab_23VIR1686-1/2023	State Veterinary Institute	Istituto Zooprofilattico Sperimentale Delle Venezie	Dirbakova, Z.; Tinak, M.; Pastori, A.; Zecchin, B.; Fusaro, A.; Schivo, A.; Salviato, A.; Palumbo, E.; Giussani, E.; Monne, I.; Terregino, C.
EPI2560231	HA	Slovakia	2023-Jan-30	EPI_ISL_17679814	A/chicken/Slovakia/153-brain_23VIR1686-12/2023	State Veterinary Institute	Istituto Zooprofilattico Sperimentale Delle Venezie	Dirbakova, Z.; Tinak, M.; Pastori, A.; Zecchin, B.; Fusaro, A.; Schivo, A.; Salviato, A.; Palumbo, E.; Giussani, E.; Monne, I.; Terregino, C.
EPI2560223	HA	Slovakia	2023-Jan-30	EPI_ISL_17679813	A/chicken/Slovakia/153-organs_23VIR1686-11/2023	State Veterinary Institute	Istituto Zooprofilattico Sperimentale Delle Venezie	Dirbakova, Z.; Tinak, M.; Pastori, A.; Zecchin, B.; Fusaro, A.; Schivo, A.; Salviato, A.; Palumbo, E.; Giussani, E.; Monne, I.; Terregino, C.
EPI2560015	HA	Italy	2022-Nov-03	EPI_ISL_17679787	A/rural_chicken/Italy/22VIR10636-8/2022	Istituto Zooprofilattico Sperimentale delle Venezie, EU/OIE/Reference Laboratory and FAO Reference Centre for AI and ND	Istituto Zooprofilattico Sperimentale Delle Venezie	Pastori, A.; Zecchin, B.; Fusaro, A.; Schivo, A.; Salviato, A.; Palumbo, E.; Giussani, E.; Monne, I.; Terregino, C.
EPI2536742	HA	United Kingdom	2023-Apr-12	EPI_ISL_17564760	A/chicken/Wales/057026/2023	Animal and Plant Health Agency (APHA)	Animal and Plant Health Agency (APHA)
EPI2352601	HA	United Kingdom	2023-Jan-11	EPI_ISL_16811191	A/chicken/Scotland/006955/2023	Animal and Plant Health Agency (APHA)	Animal and Plant Health Agency (APHA)
EPI2352538	HA	United Kingdom	2023-Jan-08	EPI_ISL_16811183	A/chicken/England/005094/2023	Animal and Plant Health Agency (APHA)	Animal and Plant Health Agency (APHA)
EPI2312568	HA	Czech Republic	2022-Dec-08	EPI_ISL_16647784	A/chicken/Czech_Republic/22911-1/2022	State Veterinary Institute Prague	State Veterinary Institute Prague	Alexander,Nagy;Lenka,Cernikova;Martina,Stara
EPI1962009	HA	Italy	2021-Dec-03	EPI_ISL_8882169	A/chicken/Italy/21VIR10573-1/2021	Istituto Zooprofilattico Sperimentale delle Venezie, EU/OIE/Reference Laboratory and FAO Reference Centre for AI and ND	Istituto Zooprofilattico Sperimentale delle Venezie	Barbierato, G.; Zecchin, B.; Fusaro, A.; Schivo, A.; Salviato, A.; Palumbo, E.; Giussani, E.; Monne, I.; Terregino, C.
EPI1962001	HA	Italy	2021-Dec-06	EPI_ISL_8882168	A/chicken/Italy/21VIR10850/2021	Istituto Zooprofilattico Sperimentale delle Venezie, EU/OIE/Reference Laboratory and FAO Reference Centre for AI and ND	Istituto Zooprofilattico Sperimentale delle Venezie	Barbierato, G.; Zecchin, B.; Fusaro, A.; Schivo, A.; Salviato, A.; Palumbo, E.; Giussani, E.; Monne, I.; Terregino, C.
EPI1965237	HA	Netherlands	2022-Jan-22	EPI_ISL_9111105	A/chicken/Netherlands/22001401-001005/2022	Wageningen Bioveterinary Research	Wageningen Bioveterinary Research	Beerens, Nancy; Harders, Frank; Pritz-Verschuren, Sylvia; Roose, Marit; Venema, Sandra; Germeraad, Evelien; Engelsma, Marc; Heutink, Rene
EPI1923252	HA	Netherlands	2021-Oct-22	EPI_ISL_5588106	A/chicken/Netherlands/21037233-001/2021	Wageningen Bioveterinary Research	Wageningen Bioveterinary Research	Beerens, Nancy; Harders, Frank; Pritz-Verschuren, Sylvia; Roose, Marit; Germeraad, Evelien; Engelsma, Marc; Heutink, Rene
EPI1923244	HA	Netherlands	2021-Oct-25	EPI_ISL_5588100	A/chicken/Netherlands/21037287-006010/2021	Wageningen Bioveterinary Research	Wageningen Bioveterinary Research	Beerens, Nancy; Harders, Frank; Pritz-Verschuren, Sylvia; Roose, Marit; Germeraad, Evelien; Engelsma, Marc; Heutink, Rene
EPI2536734	HA	United Kingdom	2023-Apr-11	EPI_ISL_17564740	A/domestic_duck/England/056995/2023	Animal and Plant Health Agency (APHA)	Animal and Plant Health Agency (APHA)
EPI2352522	HA	United Kingdom	2023-Jan-03	EPI_ISL_16811181	A/domestic_duck/England/002072/2023	Animal and Plant Health Agency (APHA)	Animal and Plant Health Agency (APHA)
EPI2205109	HA	Korea, Republic of	2022-Feb-05	EPI_ISL_15647837	A/duck/Korea/H125/2022	animal and plant quarantine agency	Animal and Plant Quarantine Agency (APQA)
EPI2205085	HA	Korea, Republic of	2022-Oct-17	EPI_ISL_15647834	A/duck/Korea/H493/2022	animal and plant quarantine agency	Animal and Plant Quarantine Agency (APQA)
EPI2072328	HA	United Kingdom	2022-Apr-06	EPI_ISL_13370921	A/domestic_duck/England/042266/2022	Animal and Plant Health Agency (APHA)	Animal and Plant Health Agency (APHA)
EPI2072320	HA	United Kingdom	2022-Apr-04	EPI_ISL_13370920	A/domestic_duck/England/040831/2022	Animal and Plant Health Agency (APHA)	Animal and Plant Health Agency (APHA)
EPI2072304	HA	United Kingdom	2022-Apr-04	EPI_ISL_13370918	A/domestic_duck/England/041295/2022	Animal and Plant Health Agency (APHA)	Animal and Plant Health Agency (APHA)
EPI2072280	HA	United Kingdom	2022-Mar-26	EPI_ISL_13370915	A/domestic_duck/England/032919/2022	Animal and Plant Health Agency (APHA)	Animal and Plant Health Agency (APHA)
EPI2072272	HA	United Kingdom	2022-Mar-20	EPI_ISL_13370914	A/domestic_duck/England/029617/2022	Animal and Plant Health Agency (APHA)	Animal and Plant Health Agency (APHA)
EPI2072256	HA	United Kingdom	2022-Mar-11	EPI_ISL_13370912	A/domestic_duck/England/025639/2022	Animal and Plant Health Agency (APHA)	Animal and Plant Health Agency (APHA)
EPI2072248	HA	United Kingdom	2022-Mar-10	EPI_ISL_13370911	A/domestic_duck/England/025226/2022	Animal and Plant Health Agency (APHA)	Animal and Plant Health Agency (APHA)
EPI2072240	HA	United Kingdom	2022-Mar-09	EPI_ISL_13370910	A/domestic_duck/Scotland/024305/2022	Animal and Plant Health Agency (APHA)	Animal and Plant Health Agency (APHA)
EPI2072160	HA	United Kingdom	2022-Feb-28	EPI_ISL_13370710	A/domestic_duck/England/019894/2022	Animal and Plant Health Agency (APHA)	Animal and Plant Health Agency (APHA)
EPI2072136	HA	United Kingdom	2022-Feb-21	EPI_ISL_13370707	A/domestic_duck/England/017166/2022	Animal and Plant Health Agency (APHA)	Animal and Plant Health Agency (APHA)
EPI2072104	HA	United Kingdom	2022-Feb-03	EPI_ISL_13370703	A/domestic_duck/England/012247/2022	Animal and Plant Health Agency (APHA)	Animal and Plant Health Agency (APHA)
EPI2072096	HA	United Kingdom	2022-Jan-27	EPI_ISL_13370702	A/mallard_duck/England/388009/2022	Animal and Plant Health Agency (APHA)	Animal and Plant Health Agency (APHA)
EPI2071976	HA	United Kingdom	2022-Jan-02	EPI_ISL_13370631	A/domestic_duck/England/000357/2022	Animal and Plant Health Agency (APHA)	Animal and Plant Health Agency (APHA)
EPI2071928	HA	United Kingdom	2021-Dec-30	EPI_ISL_13370625	A/domestic_duck/England/076401/2021	Animal and Plant Health Agency (APHA)	Animal and Plant Health Agency (APHA)
EPI1963400	HA	United Kingdom	2021-Nov-01	EPI_ISL_9012700	A/domestic_duck/Scotland/054469/2021	Animal and Plant Health Agency (APHA)	Animal and Plant Health Agency (APHA)
EPI2071968	HA	United Kingdom	2021-Dec-31	EPI_ISL_13370630	A/Goshawk/England/387180/2021	Animal and Plant Health Agency (APHA)	Animal and Plant Health Agency (APHA)
EPI2071960	HA	United Kingdom	2021-Dec-31	EPI_ISL_13370629	A/Common_Buzzard/England/245285/2021	Animal and Plant Health Agency (APHA)	Animal and Plant Health Agency (APHA)
EPI2071440	HA	United Kingdom	2021-Nov-30	EPI_ISL_13370418	A/common_buzzard/Scotland/294149/2021	Animal and Plant Health Agency (APHA)	Animal and Plant Health Agency (APHA)
EPI1965221	HA	Netherlands	2022-Jan-07	EPI_ISL_9111103	A/common buzzard/Netherlands/22000488-002/2022	Wageningen Bioveterinary Research	Wageningen Bioveterinary Research	Beerens, Nancy; Harders, Frank; Pritz-Verschuren, Sylvia; Roose, Marit; Venema, Sandra; Germeraad, Evelien; Engelsma, Marc; Heutink, Rene
EPI1958449	HA	Netherlands	2021-Dec-26	EPI_ISL_8799318	A/common buzzard/Netherlands/21041449-002/2021	Wageningen Bioveterinary Research	Wageningen Bioveterinary Research	Beerens, Nancy; Harders, Frank; Pritz-Verschuren, Sylvia; Roose, Marit; Venema, Sandra; Germeraad, Evelien; Engelsma, Marc; Heutink, Rene
EPI2068993	HA	Sweden	2022-Mar-31	EPI_ISL_13338051	A/white-tailed eagle/Sweden/SVA220412SZ0583/FB001304/AC-2022	Swedish Veterinary Agency (SVA)	Swedish Veterinary Agency (SVA)
EPI2297248	HA	Belgium	2022-Oct-17	EPI_ISL_16549379	A/Phasianus_colchicus/Belgium/12352-0002/2022	Sciensano - Animal Infectious Diseases	Sciensano, Department of Animal Infectious Diseases	Van Borm, Steven; Roupie, Virginie; Hostyn, Pierre; Lambrecht, Benedicte; Steensels, Mieke
EPI2297217	HA	Belgium	2022-Nov-15	EPI_ISL_16549349	A/Phasianus_colchicus/Belgium/10993-0003/2022	Sciensano - Animal Infectious Diseases	Sciensano, Department of Animal Infectious Diseases	Van Borm, Steven; Roupie, Virginie; Hostyn, Pierre; Lambrecht, Benedicte; Steensels, Mieke
EPI2072152	HA	United Kingdom	2022-Feb-26	EPI_ISL_13370709	A/pheasant/England/019746/2022	Animal and Plant Health Agency (APHA)	Animal and Plant Health Agency (APHA)
EPI2072128	HA	United Kingdom	2022-Feb-20	EPI_ISL_13370706	A/pheasant/Wales/016303/2022	Animal and Plant Health Agency (APHA)	Animal and Plant Health Agency (APHA)
EPI2072120	HA	United Kingdom	2022-Feb-20	EPI_ISL_13370705	A/pheasant/Wales/016441/2022	Animal and Plant Health Agency (APHA)	Animal and Plant Health Agency (APHA)
EPI1958425	HA	Netherlands	2021-Dec-17	EPI_ISL_8799314	A/red knot/Netherlands/21040956-003/2021	Wageningen Bioveterinary Research	Wageningen Bioveterinary Research	Beerens, Nancy; Harders, Frank; Pritz-Verschuren, Sylvia; Roose, Marit; Venema, Sandra; Germeraad, Evelien; Engelsma, Marc; Heutink, Rene
EPI2205101	HA	Korea, Republic of	2022-Oct-10	EPI_ISL_15647836	A/Mandarin duck/Korea/WA496/2022	animal and plant quarantine agency	Animal and Plant Quarantine Agency (APQA)
EPI2608195	HA	Sweden	2023-Jun-15	EPI_ISL_17859692	A/black-headed gull/Sweden/SVA230620SZ0298/FB002028/H-2023	Swedish Veterinary Agency (SVA)	Swedish Veterinary Agency (SVA)	"Siamak,Zohari"
EPI2071424	HA	United Kingdom	2021-Nov-30	EPI_ISL_13370416	A/Black-headed_gull/England/064433/2021	Animal and Plant Health Agency (APHA)	Animal and Plant Health Agency (APHA)
EPI2222976	HA	Netherlands	2022-Oct-31	EPI_ISL_15909904	A/Barnacle Goose/Netherlands/22019555-001/2022	Wageningen Bioveterinary Research	Wageningen Bioveterinary Research	Beerens, Nancy; Harders, Frank; Pritz-Verschuren, Sylvia; Roose, Marit; Venema, Sandra; Germeraad, Evelien; Engelsma, Marc; Heutink, Rene
EPI2071432	HA	United Kingdom	2021-Nov-30	EPI_ISL_13370417	A/barnacle_goose/Scotland/064368/2021	Animal and Plant Health Agency (APHA)	Animal and Plant Health Agency (APHA)
EPI2068968	HA	Sweden	2022-Apr-23	EPI_ISL_13338024	A/Barnacle goose/Sweden/SVA220428SZ0404/FB001285/H-2022	Swedish Veterinary Agency (SVA)	Swedish Veterinary Agency (SVA)
EPI1988037	HA	Netherlands	2022-Feb-02	EPI_ISL_10454874	A/barnacle goose/Netherlands/22002507-002/2022	Wageningen Bioveterinary Research	Wageningen Bioveterinary Research	Beerens, Nancy; Harders, Frank; Pritz-Verschuren, Sylvia; Roose, Marit; Venema, Sandra; Germeraad, Evelien; Engelsma, Marc; Heutink, Rene
EPI1943846	HA	Germany	2021-Apr-14	EPI_ISL_5146291	A/barnacle goose/Germany-NI/AI03980/2021	Lebensmittel- und Veterinärinstitut Oldenburg - Standort Veterinärinstitut	Friedrich-Loeffler-Institut
EPI2296773	HA	Belgium	2022-Nov-18	EPI_ISL_16549157	A/Gallus_gallus/Belgium/13357-0001/2022	Sciensano - Animal Infectious Diseases	Sciensano, Department of Animal Infectious Diseases	Van Borm, Steven; Roupie, Virginie; Hostyn, Pierre; Lambrecht, Benedicte; Steensels, Mieke
EPI2208426	HA	Belgium	2022-Sep-19	EPI_ISL_15697407	A/Gallus_gallus/Belgium/10968_0005/2022	Sciensano - Animal Infectious Diseases	Sciensano, Department of Animal Infectious Diseases
EPI2072360	HA	United Kingdom	2022-May-05	EPI_ISL_13370925	A/chicken/England/063896/2022	Animal and Plant Health Agency (APHA)	Animal and Plant Health Agency (APHA)
EPI2072352	HA	United Kingdom	2022-Apr-21	EPI_ISL_13370924	A/chicken/England/053826/2022	Animal and Plant Health Agency (APHA)	Animal and Plant Health Agency (APHA)
EPI2072344	HA	United Kingdom	2022-Apr-12	EPI_ISL_13370923	A/chicken/England/046274/2022	Animal and Plant Health Agency (APHA)	Animal and Plant Health Agency (APHA)
EPI2072336	HA	United Kingdom	2022-Apr-06	EPI_ISL_13370922	A/chicken/England/042391/2022	Animal and Plant Health Agency (APHA)	Animal and Plant Health Agency (APHA)
EPI2072296	HA	United Kingdom	2022-Mar-28	EPI_ISL_13370917	A/chicken/England/034820/2022	Animal and Plant Health Agency (APHA)	Animal and Plant Health Agency (APHA)
EPI2072288	HA	United Kingdom	2022-Mar-27	EPI_ISL_13370916	A/chicken/England/033318/2022	Animal and Plant Health Agency (APHA)	Animal and Plant Health Agency (APHA)
EPI2072264	HA	United Kingdom	2022-Mar-18	EPI_ISL_13370913	A/chicken/Scotland/029509/2022	Animal and Plant Health Agency (APHA)	Animal and Plant Health Agency (APHA)
EPI2072232	HA	United Kingdom	2022-Mar-09	EPI_ISL_13370909	A/chicken/Scotland/024309/2022	Animal and Plant Health Agency (APHA)	Animal and Plant Health Agency (APHA)
EPI2072112	HA	United Kingdom	2022-Feb-12	EPI_ISL_13370704	A/chicken/England/014330/2022	Animal and Plant Health Agency (APHA)	Animal and Plant Health Agency (APHA)
EPI2072088	HA	United Kingdom	2022-Jan-27	EPI_ISL_13370701	A/chicken/England/009811/2022	Animal and Plant Health Agency (APHA)	Animal and Plant Health Agency (APHA)
EPI2072072	HA	United Kingdom	2022-Jan-26	EPI_ISL_13370699	A/chicken/England/008775/2022	Animal and Plant Health Agency (APHA)	Animal and Plant Health Agency (APHA)
EPI2072056	HA	United Kingdom	2022-Jan-23	EPI_ISL_13370697	A/chicken/England/007584/2022	Animal and Plant Health Agency (APHA)	Animal and Plant Health Agency (APHA)
EPI2072000	HA	United Kingdom	2022-Jan-08	EPI_ISL_13370634	A/chicken/England/002376/2022	Animal and Plant Health Agency (APHA)	Animal and Plant Health Agency (APHA)
EPI2071984	HA	United Kingdom	2022-Jan-02	EPI_ISL_13370632	A/chicken/England/000095/2022	Animal and Plant Health Agency (APHA)	Animal and Plant Health Agency (APHA)
EPI2071464	HA	United Kingdom	2021-Dec-01	EPI_ISL_13370421	A/chicken/England/064131/2021	Animal and Plant Health Agency (APHA)	Animal and Plant Health Agency (APHA)
EPI2071456	HA	United Kingdom	2021-Dec-01	EPI_ISL_13370420	A/chicken/England/064233/2021	Animal and Plant Health Agency (APHA)	Animal and Plant Health Agency (APHA)
EPI2071448	HA	United Kingdom	2021-Dec-01	EPI_ISL_13370419	A/chicken/England/064357/2021	Animal and Plant Health Agency (APHA)	Animal and Plant Health Agency (APHA)
EPI2013082	HA	Belgium	2022-Mar-28	EPI_ISL_11880371	A/Gallus_gallus/Belgium/4190_0002/2022	Sciensano - Animal Infectious Diseases	Sciensano, Department of Animal Infectious Diseases	Van Borm, Steven; Roupie, Virginie; Lambrecht, Benedicte; Mathijs, Elisabeth; Steensels, Mieke
EPI1963392	HA	United Kingdom	2021-Nov-01	EPI_ISL_9012696	A/chicken/Scotland/054477/2021	Animal and Plant Health Agency (APHA)	Animal and Plant Health Agency (APHA)
EPI1963376	HA	United Kingdom	2021-Oct-30	EPI_ISL_9012618	A/chicken/Wales/053969/2021	Animal and Plant Health Agency (APHA)	Animal and Plant Health Agency (APHA)
EPI2697571	HA	Finland	2023-Jul-20	EPI_ISL_18122458	A/black-headed-gull/Finland/8254/2023	Finnish Food Authority	Finnish Institute for Health and Welfare, THL	Tuija Kantala, Alice Fusaro, Tuija Gadd, Monica Gallo, Niina Ikonen, Lauri Kareinen, Ari Kauppinen, Niina Tammiranta, Erika Lindh
EPI2697566	HA	Finland	2023-Jul-20	EPI_ISL_18122457	A/black-headed-gull/Finland/8250/2023	Finnish Food Authority	Finnish Institute for Health and Welfare, THL	Tuija Kantala, Alice Fusaro, Tuija Gadd, Monica Gallo, Niina Ikonen, Lauri Kareinen, Ari Kauppinen, Niina Tammiranta, Erika Lindh
EPI2697558	HA	Finland	2023-Jul-20	EPI_ISL_18122456	A/black-headed-gull/Finland/8241/2023	Finnish Food Authority	Finnish Institute for Health and Welfare, THL	Tuija Kantala, Alice Fusaro, Tuija Gadd, Monica Gallo, Niina Ikonen, Lauri Kareinen, Ari Kauppinen, Niina Tammiranta, Erika Lindh
EPI2697542	HA	Finland	2023-Jul-13	EPI_ISL_18122450	A/black-headed-gull/Finland/7897/2023	Finnish Food Authority	Finnish Institute for Health and Welfare, THL	Tuija Kantala, Alice Fusaro, Tuija Gadd, Monica Gallo, Niina Ikonen, Lauri Kareinen, Ari Kauppinen, Niina Tammiranta, Erika Lindh
EPI2697534	HA	Finland	2023-Jul-13	EPI_ISL_18122449	A/black-headed-gull/Finland/7896/2023	Finnish Food Authority	Finnish Institute for Health and Welfare, THL	Tuija Kantala, Alice Fusaro, Tuija Gadd, Monica Gallo, Niina Ikonen, Lauri Kareinen, Ari Kauppinen, Niina Tammiranta, Erika Lindh
EPI2697526	HA	Finland	2023-Jul-13	EPI_ISL_18122448	A/black-headed-gull/Finland/7895/2023	Finnish Food Authority	Finnish Institute for Health and Welfare, THL	Tuija Kantala, Alice Fusaro, Tuija Gadd, Monica Gallo, Niina Ikonen, Lauri Kareinen, Ari Kauppinen, Niina Tammiranta, Erika Lindh
EPI2218141	HA	Belgium	2022-Sep-16	EPI_ISL_15812579	A/Anser_anser_domesticus/Belgium/10918_0002/2022	Sciensano - Animal Infectious Diseases	Sciensano, Department of Animal Infectious Diseases	Van Borm, Steven; Roupie, Virginie; Lambrecht, Benedicte; Steensels, Mieke
EPI2072312	HA	United Kingdom	2022-Apr-04	EPI_ISL_13370919	A/domestic_goose/England/041268/2022	Animal and Plant Health Agency (APHA)	Animal and Plant Health Agency (APHA)
EPI2072144	HA	United Kingdom	2022-Feb-25	EPI_ISL_13370708	A/domestic_goose/England/019349/2022	Animal and Plant Health Agency (APHA)	Animal and Plant Health Agency (APHA)
EPI2072064	HA	United Kingdom	2022-Jan-26	EPI_ISL_13370698	A/domestic_goose/England/008781/2022	Animal and Plant Health Agency (APHA)	Animal and Plant Health Agency (APHA)
EPI2072032	HA	United Kingdom	2022-Jan-19	EPI_ISL_13370694	A/Domestic_goose/England/006847/2022	Animal and Plant Health Agency (APHA)	Animal and Plant Health Agency (APHA)
EPI1965994	HA	Belgium	2021-Nov-21	EPI_ISL_9160206	A/Anser_albifrons/Belgium/15465_0010/2021	Sciensano - Animal Infectious Diseases	Sciensano, Department of Animal Infectious Diseases	Van Borm, Steven; Roupie, Virginie; Lambrecht, Benedicte; Mathijs, Elisabeth; Steensels, Mieke
EPI2205093	HA	Korea, Republic of	2022-Oct-19	EPI_ISL_15647835	A/common teal/Korea/WA537/2022	animal and plant quarantine agency	Animal and Plant Quarantine Agency (APQA)
EPI2072080	HA	United Kingdom	2022-Jan-27	EPI_ISL_13370700	A/turkey/England/009687/2022	Animal and Plant Health Agency (APHA)	Animal and Plant Health Agency (APHA)
EPI2072048	HA	United Kingdom	2022-Jan-23	EPI_ISL_13370696	A/turkey/England/007586/2022	Animal and Plant Health Agency (APHA)	Animal and Plant Health Agency (APHA)
EPI2072040	HA	United Kingdom	2022-Jan-20	EPI_ISL_13370695	A/turkey/England/006963/2022	Animal and Plant Health Agency (APHA)	Animal and Plant Health Agency (APHA)
EPI2072016	HA	United Kingdom	2022-Jan-12	EPI_ISL_13370692	A/turkey/England/004667/2022	Animal and Plant Health Agency (APHA)	Animal and Plant Health Agency (APHA)
EPI2071992	HA	United Kingdom	2022-Jan-04	EPI_ISL_13370633	A/turkey/England/000733/2022	Animal and Plant Health Agency (APHA)	Animal and Plant Health Agency (APHA)
EPI2071936	HA	United Kingdom	2021-Dec-30	EPI_ISL_13370626	A/turkey/England/076717/2021	Animal and Plant Health Agency (APHA)	Animal and Plant Health Agency (APHA)
EPI1950455	HA	Korea, Republic of	2021-Nov-15	EPI_ISL_8406345	A/Common Teal/South Korea/W816/2021	Chungbuk National University	Chungbuk National University
EPI1950447	HA	Korea, Republic of	2021-Nov-15	EPI_ISL_8406342	A/Common Teal/South Korea/W815/2021	Chungbuk National University	Chungbuk National University
EPI1950439	HA	Korea, Republic of	2021-Nov-15	EPI_ISL_8406341	A/Common Teal/South Korea/W814/2021	Chungbuk National University	Chungbuk National University
EPI1927502	HA	Netherlands	2021-Nov-02	EPI_ISL_6375134	A/waterfowl/Netherlands/21037914-006/2021	Wageningen Bioveterinary Research	Wageningen Bioveterinary Research	Beerens, Nancy; Harders, Frank; Pritz-Verschuren, Sylvia; Roose, Marit; Germeraad, Evelien; Engelsma, Marc; Heutink, Rene
EPI2744224	HA	Sweden	2023-Jun-06	EPI_ISL_18255293	A/peregrine falcon/Sweden/SVA230725SZ0382/FB002504/M-2023	Swedish Veterinary Agency (SVA)	Swedish Veterinary Agency (SVA)	"Siamak,Zohari"
EPI2744216	HA	Sweden	2023-Jul-20	EPI_ISL_18255288	A/peregrine falcon/Sweden/SVA230808SZ0403/FB002649/E-2023	Swedish Veterinary Agency (SVA)	Swedish Veterinary Agency (SVA)	"Siamak,Zohari"
EPI2540193	HA	Belgium	2023-Mar-01	EPI_ISL_17599455	A/Falco_peregrinus/Belgium/01823_0003/2023	Sciensano - Animal Infectious Diseases	Sciensano, Department of Animal Infectious Diseases	Van Borm, Steven; Roupie, Virginie; Hostyn, Pierre; Mathijs, Elisabeth; Lambrecht, Benedicte; Steensels, Mieke
EPI2310114	HA	United States	2022-Mar-24	EPI_ISL_16632499	A/peregrine falcon/Massachusetts/22-010671-009/2022	Cummings School of Veterinary Medicine at Tufts University	Cummings School of Veterinary Medicine at Tufts University	Chinh,Thanh; Franzen,Kerrie; Love,Emily; Killian,Mary; Lantz,Kristina; Hicks,Jessica; Norris, Cameron; Stuber,Tod; Sawatzki, Kaitlin; Puryear, Wendy; Foss, Alexa; Murray,Maureen; Cox,Elena; Runstadler, Jonathan
EPI2254379	HA	Luxembourg	2022-Dec-11	EPI_ISL_16206845	A/goose/Luxembourg/22253283/2022	Laboratoire de médecine vétérinaire de l'Etat	Luxembourg Institute of Health	Chantal Snoeck, Aurélie Sausy
EPI1998426	HA	Spain	2022-Jan-26	EPI_ISL_11259319	A/goose/Spain/294-2_22VIR2142-9/2022	Laboratorio Central de Veterinaria	Istituto Zooprofilattico Sperimentale delle Venezie	Ruano, M.J.; Rocha, A.; Sanchez, A.; Aguero, M; Barbierato, G.; Zecchin, B.; Fusaro, A.; Schivo, A.; Salviato, A.; Palumbo, E.; Giussani, E.; Monne, I.; Terregino, C.
EPI1998418	HA	Spain	2022-Jan-22	EPI_ISL_11259318	A/goose/Spain/239-1_22VIR2142-8/2022	Laboratorio Central de Veterinaria	Istituto Zooprofilattico Sperimentale delle Venezie	Ruano, M.J.; Rocha, A.; Sanchez, A.; Aguero, M; Barbierato, G.; Zecchin, B.; Fusaro, A.; Schivo, A.; Salviato, A.; Palumbo, E.; Giussani, E.; Monne, I.; Terregino, C.
EPI1998402	HA	Spain	2022-Jan-14	EPI_ISL_11259316	A/goose/Spain/141-9_22VIR2142-6/2022	Laboratorio Central de Veterinaria	Istituto Zooprofilattico Sperimentale delle Venezie	Ruano, M.J.; Rocha, A.; Sanchez, A.; Aguero, M; Barbierato, G.; Zecchin, B.; Fusaro, A.; Schivo, A.; Salviato, A.; Palumbo, E.; Giussani, E.; Monne, I.; Terregino, C.
EPI1998298	HA	Spain	2022-Jan-07	EPI_ISL_11259303	A/goose/Spain/65-3_22VIR2142-2/2022	Laboratorio Central de Veterinaria	Istituto Zooprofilattico Sperimentale delle Venezie	Ruano, M.J.; Rocha, A.; Sanchez, A.; Aguero, M; Barbierato, G.; Zecchin, B.; Fusaro, A.; Schivo, A.; Salviato, A.; Palumbo, E.; Giussani, E.; Monne, I.; Terregino, C.
EPI1980589	HA	Czech Republic	2021-Nov-19	EPI_ISL_9603924	A/goose/Czech Republic/22750/2021	State Veterinary Institute Prague	State Veterinary Institute Prague	Alexander,Nagy;Lenka,Cernikova;Martina,Stara
EPI1980508	HA	Czech Republic	2021-Nov-18	EPI_ISL_9603901	A/goose/Czech Republic/22608-3T/2021	State Veterinary Institute Prague	State Veterinary Institute Prague	Alexander,Nagy;Lenka,Cernikova;Martina,Stara
EPI1980492	HA	Czech Republic	2021-Nov-18	EPI_ISL_9603819	A/goose/Czech Republic/22608-2T/2021	State Veterinary Institute Prague	State Veterinary Institute Prague	Alexander,Nagy;Lenka,Cernikova;Martina,Stara
EPI1980476	HA	Czech Republic	2021-Nov-18	EPI_ISL_9603795	A/goose/Czech Republic/22608-1T/2021	State Veterinary Institute Prague	State Veterinary Institute Prague	Alexander,Nagy;Lenka,Cernikova;Martina,Stara
EPI1980460	HA	Czech Republic	2021-Nov-26	EPI_ISL_9603780	A/goose/Czech Republic/23458-1K/2021	State Veterinary Institute Prague	State Veterinary Institute Prague	Alexander,Nagy;Lenka,Cernikova;Martina,Stara
EPI1980443	HA	Czech Republic	2021-Nov-26	EPI_ISL_9603775	A/goose/Czech Republic/23458-4T/2021	State Veterinary Institute Prague	State Veterinary Institute Prague	Alexander,Nagy;Lenka,Cernikova;Martina,Stara
EPI1980427	HA	Czech Republic	2021-Nov-26	EPI_ISL_9603769	A/goose/Czech Republic/23458-5T/2021	State Veterinary Institute Prague	State Veterinary Institute Prague	Alexander,Nagy;Lenka,Cernikova;Martina,Stara
EPI1980411	HA	Czech Republic	2021-Nov-26	EPI_ISL_9603767	A/goose/Czech Republic/23458-2T/2021	State Veterinary Institute Prague	State Veterinary Institute Prague	Alexander,Nagy;Lenka,Cernikova;Martina,Stara
EPI2076373	HA	United Kingdom	2022-Mar-07	EPI_ISL_13486869	A/Greylag_goose/Scotland/024915/2022	Animal and Plant Health Agency (APHA)	Animal and Plant Health Agency (APHA)
EPI2075642	HA	United Kingdom	2022-Mar-18	EPI_ISL_13453564	A/goose/Scotland/031099/2022	Animal and Plant Health Agency (APHA)	Animal and Plant Health Agency (APHA)
EPI1963905	HA	United Kingdom	2021-Oct-30	EPI_ISL_9029965	A/Greylag_goose/England/054503/2021	Animal and Plant Health Agency (APHA)	Animal and Plant Health Agency (APHA)
EPI2246897	HA	Canada	2022-Apr-04	EPI_ISL_16173525	A/Snow Goose/SK/FAV-0216-06/2022	Western Veterinary College	Canadian Food Inspection Agency	Alkie, Tamiru; Bravo Araya, Maria; Pybus, Margo J; Xu, Wanhong; Hisanaga, Tamiko; Suderman, Suderman; Koziuk, Janice; Kruczkiewicz, Peter; Nguyen, Hoang Hai; Fisher, Mathew; Lung, Oliver; Berhane, Yohannes
EPI2612007	HA	Italy	2023-Jun-11	EPI_ISL_17958952	A/slender-billed_gull/Italy/23VIR5730-6/2023	Istituto Zooprofilattico Sperimentale delle Venezie, EU/OIE/Reference Laboratory and FAO Reference Centre for AI and ND	Istituto Zooprofilattico Sperimentale Delle Venezie	Pastori, A.; Zecchin, B.; Fusaro, A.; Schivo, A.; Salviato, A.; Palumbo, E.; Giussani, E.; Monne, I.; Terregino, C.
EPI2611999	HA	Italy	2023-Jun-11	EPI_ISL_17958951	A/slender-billed_gull/Italy/23VIR5730-11/2023	Istituto Zooprofilattico Sperimentale delle Venezie, EU/OIE/Reference Laboratory and FAO Reference Centre for AI and ND	Istituto Zooprofilattico Sperimentale Delle Venezie	Pastori, A.; Zecchin, B.; Fusaro, A.; Schivo, A.; Salviato, A.; Palumbo, E.; Giussani, E.; Monne, I.; Terregino, C.
EPI2611991	HA	Italy	2023-Jun-11	EPI_ISL_17958950	A/slender-billed_gull/Italy/23VIR5730-10/2023	Istituto Zooprofilattico Sperimentale delle Venezie, EU/OIE/Reference Laboratory and FAO Reference Centre for AI and ND	Istituto Zooprofilattico Sperimentale Delle Venezie	Pastori, A.; Zecchin, B.; Fusaro, A.; Schivo, A.; Salviato, A.; Palumbo, E.; Giussani, E.; Monne, I.; Terregino, C.
EPI2611983	HA	Italy	2023-Jun-11	EPI_ISL_17958949	A/black-headed_gull/Italy/23VIR5685-1/2023	Istituto Zooprofilattico Sperimentale delle Venezie, EU/OIE/Reference Laboratory and FAO Reference Centre for AI and ND	Istituto Zooprofilattico Sperimentale Delle Venezie	Pastori, A.; Zecchin, B.; Fusaro, A.; Schivo, A.; Salviato, A.; Palumbo, E.; Giussani, E.; Monne, I.; Terregino, C.
EPI2611975	HA	Italy	2023-Jun-11	EPI_ISL_17958948	A/black-headed_gull/Italy/23VIR5684-1/2023	Istituto Zooprofilattico Sperimentale delle Venezie, EU/OIE/Reference Laboratory and FAO Reference Centre for AI and ND	Istituto Zooprofilattico Sperimentale Delle Venezie	Pastori, A.; Zecchin, B.; Fusaro, A.; Schivo, A.; Salviato, A.; Palumbo, E.; Giussani, E.; Monne, I.; Terregino, C.
EPI2318026	HA	Japan	2022-Nov-06	EPI_ISL_16698579	A/slaty-backed gull/Hokkaido/0111M111/2022	National Institute for Environmental Studies	Graduate School of Veterinary Medicine, Hokkaido University	Manabu, Onuma; Kei, Nabeshima; Atsushi, Haga; Hisako, Honjo; Misako, Yokoyama; Yoshihiro, Sakoda; Norikazu, Isoda; Takahiro, Hiono; Hew, Yik Lim
EPI2310202	HA	United States	2022-Jul-08	EPI_ISL_16632510	A/gull/Maine/22-022526-005/2022	Cummings School of Veterinary Medicine at Tufts University	Cummings School of Veterinary Medicine at Tufts University	Chinh,Thanh; Franzen,Kerrie; Love,Emily; Killian,Mary; Lantz,Kristina; Hicks,Jessica; Norris, Cameron; Stuber,Tod; Sawatzki, Kaitlin; Puryear, Wendy; Foss, Alexa; Runstadler, Jonathan
EPI2078354	HA	France	2022-May-11	EPI_ISL_13519451	A/gull/France/22P015977/2022	Anses (Ploufragan-Plouzané)	ANSES Agence Nationale De Securite Sanitaire De L’alimentation	FX,Briand
EPI2841706	HA	Belgium	2023-Sep-11	EPI_ISL_18647515	A/Larus_argentatus/Belgium/08571_0001/2023	Sciensano - Animal Infectious Diseases	Sciensano, Department of Animal Infectious Diseases	Van Borm, Steven; Roupie, Virginie; Hostyn, Pierre; Mathijs, Elisabeth; Lambrecht, Benedicte; Steensels, Mieke
EPI2309077	HA	Sweden	2022-Dec-27	EPI_ISL_16631820	A/European herring gull/Sweden/SVA230109SZ0168/FB000042/O-2022	Swedish Veterinary Agency (SVA)	Swedish Veterinary Agency (SVA)	'Siamak,Zohari'
EPI2015061	HA	Denmark	2021-May-14	EPI_ISL_11798575	A/European_herring_gull/Denmark/19968-1.02/2021-05-14	Statens Serumm Institute	Statens Serum Institute	Charlotte Hjulsager, Yuan Liang
EPI2310391	HA	United States	2022-Mar-22	EPI_ISL_16632536	A/great black-backed gull/Massachusetts/22-010671-007/2022	Cummings School of Veterinary Medicine at Tufts University	Cummings School of Veterinary Medicine at Tufts University	Chinh,Thanh; Franzen,Kerrie; Love,Emily; Killian,Mary; Lantz,Kristina; Hicks,Jessica; Norris, Cameron; Stuber,Tod; Sawatzki, Kaitlin; Puryear, Wendy; Foss, Alexa; Patel,Priya; Runstadler, Jonathan
EPI2310314	HA	United States	2022-Jul-23	EPI_ISL_16632524	A/great black-backed gull/Massachusetts/22-025071-003/2022	Cummings School of Veterinary Medicine at Tufts University	Cummings School of Veterinary Medicine at Tufts University	Chinh,Thanh; Franzen,Kerrie; Love,Emily; Killian,Mary; Lantz,Kristina; Hicks,Jessica; Norris, Cameron; Stuber,Tod; Sawatzki, Kaitlin; Puryear, Wendy; Foss, Alexa; Patel,Priya; Runstadler, Jonathan
EPI2310274	HA	United States	2022-Jun-30	EPI_ISL_16632519	A/great black-backed gull/Massachusetts/22-022527-005/2022	Cummings School of Veterinary Medicine at Tufts University	Cummings School of Veterinary Medicine at Tufts University	Chinh,Thanh; Franzen,Kerrie; Love,Emily; Killian,Mary; Lantz,Kristina; Hicks,Jessica; Norris, Cameron; Stuber,Tod; Sawatzki, Kaitlin; Puryear, Wendy; Foss, Alexa; Ellis,Stephanie; Taylor,Jennifer; Myrbeck,Leah; Runstadler, Jonathan
EPI2310258	HA	United States	2022-Jul-08	EPI_ISL_16632517	A/great black-backed gull/Massachusetts/22-022527-002/2022	Cummings School of Veterinary Medicine at Tufts University	Cummings School of Veterinary Medicine at Tufts University	Chinh,Thanh; Franzen,Kerrie; Love,Emily; Killian,Mary; Lantz,Kristina; Hicks,Jessica; Norris, Cameron; Stuber,Tod; Sawatzki, Kaitlin; Puryear, Wendy; Foss, Alexa; Patel,Priya; Runstadler, Jonathan
EPI2310242	HA	United States	2022-Jun-29	EPI_ISL_16632515	A/great black-backed gull/Maine/22-022526-015/2022	Cummings School of Veterinary Medicine at Tufts University	Cummings School of Veterinary Medicine at Tufts University	Chinh,Thanh; Franzen,Kerrie; Love,Emily; Killian,Mary; Lantz,Kristina; Hicks,Jessica; Norris, Cameron; Stuber,Tod; Sawatzki, Kaitlin; Puryear, Wendy; Foss, Alexa; Runstadler, Jonathan
EPI2310234	HA	United States	2022-Jul-07	EPI_ISL_16632514	A/great black-backed gull/Maine/22-022526-014/2022	Cummings School of Veterinary Medicine at Tufts University	Cummings School of Veterinary Medicine at Tufts University	Chinh,Thanh; Franzen,Kerrie; Love,Emily; Killian,Mary; Lantz,Kristina; Hicks,Jessica; Norris, Cameron; Stuber,Tod; Sawatzki, Kaitlin; Puryear, Wendy; Foss, Alexa; Runstadler, Jonathan
EPI2310210	HA	United States	2022-Jun-29	EPI_ISL_16632511	A/great black-backed gull/Maine/22-022526-007/2022	Cummings School of Veterinary Medicine at Tufts University	Cummings School of Veterinary Medicine at Tufts University	Chinh,Thanh; Franzen,Kerrie; Love,Emily; Killian,Mary; Lantz,Kristina; Hicks,Jessica; Norris, Cameron; Stuber,Tod; Sawatzki, Kaitlin; Puryear, Wendy; Foss, Alexa; Runstadler, Jonathan
EPI2310162	HA	United States	2022-Mar-25	EPI_ISL_16632505	A/great black-backed gull/Massachusetts/22-016611-008/2022	Cummings School of Veterinary Medicine at Tufts University	Cummings School of Veterinary Medicine at Tufts University	Chinh,Thanh; Franzen,Kerrie; Love,Emily; Killian,Mary; Lantz,Kristina; Hicks,Jessica; Norris, Cameron; Stuber,Tod; Sawatzki, Kaitlin; Puryear, Wendy; Foss, Alexa; Falck,Karalyn; Runstadler, Jonathan
EPI2310146	HA	United States	2022-Mar-25	EPI_ISL_16632503	A/great black-backed gull/Massachusetts/22-016611-005/2022	Cummings School of Veterinary Medicine at Tufts University	Cummings School of Veterinary Medicine at Tufts University	Chinh,Thanh; Franzen,Kerrie; Love,Emily; Killian,Mary; Lantz,Kristina; Hicks,Jessica; Norris, Cameron; Stuber,Tod; Sawatzki, Kaitlin; Puryear, Wendy; Foss, Alexa; Falck,Karalyn; Runstadler, Jonathan
EPI2664982	HA	Austria	2023-Jun-14	EPI_ISL_18058703	A/common tern/Austria/23076736-001/2023	Austrian Agency for Health and Food Safety (AGES)	Austrian Agency for Health and Food Safety (AGES)
EPI2664974	HA	Austria	2023-Jun-05	EPI_ISL_18058695	A/common tern/Austria/23072665-001/2023	Austrian Agency for Health and Food Safety (AGES)	Austrian Agency for Health and Food Safety (AGES)
EPI2310290	HA	United States	2022-Jul-20	EPI_ISL_16632521	A/common tern/Maine/22-025070-002/2022	Cummings School of Veterinary Medicine at Tufts University	Cummings School of Veterinary Medicine at Tufts University	Chinh,Thanh; Franzen,Kerrie; Love,Emily; Killian,Mary; Lantz,Kristina; Hicks,Jessica; Norris, Cameron; Stuber,Tod; Sawatzki, Kaitlin; Puryear, Wendy; Foss, Alexa; Runstadler, Jonathan
EPI2310218	HA	United States	2022-Jul-07	EPI_ISL_16632512	A/common tern/Maine/22-022526-010/2022	Cummings School of Veterinary Medicine at Tufts University	Cummings School of Veterinary Medicine at Tufts University	Chinh,Thanh; Franzen,Kerrie; Love,Emily; Killian,Mary; Lantz,Kristina; Hicks,Jessica; Norris, Cameron; Stuber,Tod; Sawatzki, Kaitlin; Puryear, Wendy; Foss, Alexa; Runstadler, Jonathan
EPI2114312	HA	Netherlands	2022-Jun-25	EPI_ISL_14175218	A/Common Tern/Netherlands/22011496-002/2022	Wageningen Bioveterinary Research	Wageningen Bioveterinary Research	Beerens, Nancy; Harders, Frank; Pritz-Verschuren, Sylvia; Roose, Marit; Venema, Sandra; Germeraad, Evelien; Engelsma, Marc; Heutink, Rene
EPI2082861	HA	Netherlands	2022-Jun-16	EPI_ISL_13617700	A/sandwich tern/Netherlands/22010908-002/2022	Wageningen Bioveterinary Research	Wageningen Bioveterinary Research	Beerens, Nancy; Harders, Frank; Pritz-Verschuren, Sylvia; Roose, Marit; Venema, Sandra; Germeraad, Evelien; Engelsma, Marc; Heutink, Rene
EPI2082853	HA	Netherlands	2022-Jun-16	EPI_ISL_13617699	A/sandwich tern/Netherlands/22010908-001/2022	Wageningen Bioveterinary Research	Wageningen Bioveterinary Research	Beerens, Nancy; Harders, Frank; Pritz-Verschuren, Sylvia; Roose, Marit; Venema, Sandra; Germeraad, Evelien; Engelsma, Marc; Heutink, Rene
EPI2082845	HA	Netherlands	2022-Jun-13	EPI_ISL_13617698	A/sandwich tern/Netherlands/22010742-002/2022	Wageningen Bioveterinary Research	Wageningen Bioveterinary Research	Beerens, Nancy; Harders, Frank; Pritz-Verschuren, Sylvia; Roose, Marit; Venema, Sandra; Germeraad, Evelien; Engelsma, Marc; Heutink, Rene
EPI2082837	HA	Netherlands	2022-Jun-13	EPI_ISL_13617697	A/sandwich tern/Netherlands/22010737-002/2022	Wageningen Bioveterinary Research	Wageningen Bioveterinary Research	Beerens, Nancy; Harders, Frank; Pritz-Verschuren, Sylvia; Roose, Marit; Venema, Sandra; Germeraad, Evelien; Engelsma, Marc; Heutink, Rene
EPI2082829	HA	Netherlands	2022-Jun-08	EPI_ISL_13617696	A/sandwich tern/Netherlands/22010725-001/2022	Wageningen Bioveterinary Research	Wageningen Bioveterinary Research	Beerens, Nancy; Harders, Frank; Pritz-Verschuren, Sylvia; Roose, Marit; Venema, Sandra; Germeraad, Evelien; Engelsma, Marc; Heutink, Rene
EPI2082821	HA	Netherlands	2022-Jun-06	EPI_ISL_13617695	A/sandwich tern/Netherlands/22010437-002/2022	Wageningen Bioveterinary Research	Wageningen Bioveterinary Research	Beerens, Nancy; Harders, Frank; Pritz-Verschuren, Sylvia; Roose, Marit; Venema, Sandra; Germeraad, Evelien; Engelsma, Marc; Heutink, Rene
EPI1980670	HA	Czech Republic	2021-Dec-25	EPI_ISL_9603939	A/pheasant/Czech Republic/25827-3/2021	State Veterinary Institute Prague	State Veterinary Institute Prague	Alexander,Nagy;Lenka,Cernikova;Martina,Stara
EPI1980654	HA	Czech Republic	2021-Dec-25	EPI_ISL_9603937	A/pheasant/Czech Republic/25827-2/2021	State Veterinary Institute Prague	State Veterinary Institute Prague	Alexander,Nagy;Lenka,Cernikova;Martina,Stara
EPI1980637	HA	Czech Republic	2021-Dec-25	EPI_ISL_9603931	A/pheasant/Czech Republic/25827-1/2021	State Veterinary Institute Prague	State Veterinary Institute Prague	Alexander,Nagy;Lenka,Cernikova;Martina,Stara
EPI1980605	HA	Czech Republic	2021-Dec-20	EPI_ISL_9603927	A/mute swan/Czech Republic/25702-2/2021	State Veterinary Institute Prague	State Veterinary Institute Prague	Alexander,Nagy;Lenka,Cernikova;Martina,Stara
EPI1980573	HA	Czech Republic	2021-Nov-15	EPI_ISL_9603922	A/mute swan/Czech Republic/22684/2021	State Veterinary Institute Prague	State Veterinary Institute Prague	Alexander,Nagy;Lenka,Cernikova;Martina,Stara
EPI2076405	HA	United Kingdom	2021-Dec-11	EPI_ISL_13486975	A/Whooper_swan/Scotland/072171/2021	Animal and Plant Health Agency (APHA)	Animal and Plant Health Agency (APHA)
EPI1963897	HA	United Kingdom	2021-Nov-09	EPI_ISL_9029962	A/Whooper_swan/Scotland/056219/2021	Animal and Plant Health Agency (APHA)	Animal and Plant Health Agency (APHA)
EPI2745868	HA	Denmark	2023-Jul-27	EPI_ISL_18271511	A/mute_swan/Denmark/06134-1.02/2023-07-27	Statens Serumm Institute	Statens Serum Institute	Hjulsager,Charlotte; Liang,Yuan
EPI2222198	HA	Croatia	2022-Nov-11	EPI_ISL_15895380	A/mute swan/Croatia/126/2022	Croatian Veterinary Institute, Poultry Centre	Croatian Veterinary Institute	Savić, Vladimir; Pastori, Ambra; Zecchin, Bianca; Fusaro, Alice; Schivo, Alessia; Salviato, Annalisa; Palumbo, Elisa; Giussani, Edoardo; Monne, Isabella; Terregino, Calogero
EPI2222197	HA	Croatia	2022-Nov-10	EPI_ISL_15895379	A/mute swan/Croatia/125/2022	Croatian Veterinary Institute, Poultry Centre	Croatian Veterinary Institute	Savić, Vladimir; Pastori, Ambra; Zecchin, Bianca; Fusaro, Alice; Schivo, Alessia; Salviato, Annalisa; Palumbo, Elisa; Giussani, Edoardo; Monne, Isabella; Terregino, Calogero
EPI2208911	HA	Belgium	2022-Sep-21	EPI_ISL_15699041	A/Cygnus_olor/Belgium/11304_0009/2022	Sciensano - Animal Infectious Diseases	Sciensano, Department of Animal Infectious Diseases
EPI2076389	HA	United Kingdom	2022-Mar-04	EPI_ISL_13486890	A/Mute_Swan/Wales/057697/2022	Animal and Plant Health Agency (APHA)	Animal and Plant Health Agency (APHA)
EPI2076381	HA	United Kingdom	2021-Dec-04	EPI_ISL_13486881	A/Mute_swan/Scotland/075821/2021	Animal and Plant Health Agency (APHA)	Animal and Plant Health Agency (APHA)
EPI1994426	HA	Sweden	2022-Jan-01	EPI_ISL_10913846	A/Mute Swan/Sweden/SVA220103SZ0264/FB000005/AB-2022	Swedish Veterinary Agency (SVA)	Swedish Veterinary Agency (SVA)
EPI1980686	HA	Czech Republic	2022-Jan-10	EPI_ISL_9603943	A/mute swan/Czech Republic/785/2022	State Veterinary Institute Prague	State Veterinary Institute Prague	Alexander,Nagy;Lenka,Cernikova;Martina,Stara
EPI1980556	HA	Czech Republic	2021-Nov-15	EPI_ISL_9603920	A/mute swan/Czech Republic/22380/2021	State Veterinary Institute Prague	State Veterinary Institute Prague	Alexander,Nagy;Lenka,Cernikova;Martina,Stara
EPI1980540	HA	Czech Republic	2021-Nov-12	EPI_ISL_9603918	A/mute swan/Czech Republic/22477-2/2021	State Veterinary Institute Prague	State Veterinary Institute Prague	Alexander,Nagy;Lenka,Cernikova;Martina,Stara
EPI1980524	HA	Czech Republic	2021-Nov-12	EPI_ISL_9603916	A/mute swan/Czech Republic/22477-1/2021	State Veterinary Institute Prague	State Veterinary Institute Prague	Alexander,Nagy;Lenka,Cernikova;Martina,Stara
EPI1963881	HA	United Kingdom	2021-Nov-11	EPI_ISL_9029960	A/mute_swan/England/385466/2021	Animal and Plant Health Agency (APHA)	Animal and Plant Health Agency (APHA)
EPI1950887	HA	Romania	2021-Nov-26	EPI_ISL_8440976	A/mute_swan/Romania/16790_21VIR11355/2021	Institute for Diagnosis & Animal Health (IDAH)	Istituto Zooprofilattico Sperimentale Delle Venezie	Burlacu, R.; Neicut, A.; Onita, I.; Motiu, R.; Zecchin, B.; Fusaro, A.; Schivo, A.; Salviato, A.; Palumbo, E.; Milani, A.; Giussani, E.; Pastori, A.; Monne, I.; Terregino, C.
EPI1950879	HA	Romania	2021-Nov-11	EPI_ISL_8440175	A/Cygnus_olor/Romania/16381_21VIR10306/2021	Institute for Diagnosis & Animal Health (IDAH)	Istituto Zooprofilattico Sperimentale Delle Venezie	Burlacu, R.; Neicut, A.; Onita, I.; Motiu, R.; Zecchin, B.; Fusaro, A.; Schivo, A.; Salviato, A.; Palumbo, E.; Milani, A.; Giussani, E.; Pastori, A.; Monne, I.; Terregino, C.
EPI1927676	HA	Croatia	2021-Nov-12	EPI_ISL_6507374	A/mute swan/Croatia/100/2021	Croatian Veterinary Institute, Poultry Centre	Croatian Veterinary Institute	Savić, Vladimir
EPI2017737	HA	Italy	2021-Dec-20	EPI_ISL_12028893	A/turkey/Italy/21VIR11507/2021	Istituto Zooprofilattico Sperimentale delle Venezie, EU/OIE/Reference Laboratory and FAO Reference Centre for AI and ND	Istituto Zooprofilattico Sperimentale delle Venezie	Barbierato, G.; Zecchin, B.; Fusaro, A.; Schivo, A.; Salviato, A.; Palumbo, E.; Giussani, E.; Monne, I.; Terregino, C.
EPI2012867	HA	Denmark	2021-Oct-30	EPI_ISL_11798580	A/turkey/Denmark/24325-25/2021-10-30	Statens Serumm Institute	Statens Serum Institute	Charlotte Hjulsager, Yuan Liang
EPI1998362	HA	Spain	2022-Feb-15	EPI_ISL_11259311	A/turkey/Spain/646-7_22VIR2142-37/2022	Laboratorio Central de Veterinaria	Istituto Zooprofilattico Sperimentale delle Venezie	Ruano, M.J.; Rocha, A.; Sanchez, A.; Aguero, M; Barbierato, G.; Zecchin, B.; Fusaro, A.; Schivo, A.; Salviato, A.; Palumbo, E.; Giussani, E.; Monne, I.; Terregino, C.
EPI1998354	HA	Spain	2022-Feb-15	EPI_ISL_11259310	A/turkey/Spain/645-1_22VIR2142-36/2022	Laboratorio Central de Veterinaria	Istituto Zooprofilattico Sperimentale delle Venezie	Ruano, M.J.; Rocha, A.; Sanchez, A.; Aguero, M; Barbierato, G.; Zecchin, B.; Fusaro, A.; Schivo, A.; Salviato, A.; Palumbo, E.; Giussani, E.; Monne, I.; Terregino, C.
EPI1998322	HA	Spain	2022-Feb-14	EPI_ISL_11259306	A/turkey/Spain/586-4_22VIR2142-32/2022	Laboratorio Central de Veterinaria	Istituto Zooprofilattico Sperimentale delle Venezie	Ruano, M.J.; Rocha, A.; Sanchez, A.; Aguero, M; Barbierato, G.; Zecchin, B.; Fusaro, A.; Schivo, A.; Salviato, A.; Palumbo, E.; Giussani, E.; Monne, I.; Terregino, C.
EPI1998282	HA	Spain	2022-Feb-09	EPI_ISL_11259301	A/turkey/Spain/540-26_22VIR2142-28/2022	Laboratorio Central de Veterinaria	Istituto Zooprofilattico Sperimentale delle Venezie	Ruano, M.J.; Rocha, A.; Sanchez, A.; Aguero, M; Barbierato, G.; Zecchin, B.; Fusaro, A.; Schivo, A.; Salviato, A.; Palumbo, E.; Giussani, E.; Monne, I.; Terregino, C.
EPI1998266	HA	Spain	2022-Feb-08	EPI_ISL_11259299	A/turkey/Spain/490-22_22VIR2142-26/2022	Laboratorio Central de Veterinaria	Istituto Zooprofilattico Sperimentale delle Venezie	Ruano, M.J.; Rocha, A.; Sanchez, A.; Aguero, M; Barbierato, G.; Zecchin, B.; Fusaro, A.; Schivo, A.; Salviato, A.; Palumbo, E.; Giussani, E.; Monne, I.; Terregino, C.
EPI1998258	HA	Spain	2022-Feb-08	EPI_ISL_11259298	A/turkey/Spain/489-21_22VIR2142-25/2022	Laboratorio Central de Veterinaria	Istituto Zooprofilattico Sperimentale delle Venezie	Ruano, M.J.; Rocha, A.; Sanchez, A.; Aguero, M; Barbierato, G.; Zecchin, B.; Fusaro, A.; Schivo, A.; Salviato, A.; Palumbo, E.; Giussani, E.; Monne, I.; Terregino, C.
EPI1998250	HA	Spain	2022-Feb-06	EPI_ISL_11259297	A/turkey/Spain/455-96_22VIR2142-24/2022	Laboratorio Central de Veterinaria	Istituto Zooprofilattico Sperimentale delle Venezie	Ruano, M.J.; Rocha, A.; Sanchez, A.; Aguero, M; Barbierato, G.; Zecchin, B.; Fusaro, A.; Schivo, A.; Salviato, A.; Palumbo, E.; Giussani, E.; Monne, I.; Terregino, C.
EPI1998242	HA	Spain	2022-Feb-06	EPI_ISL_11259296	A/turkey/Spain/455-83_22VIR2142-23/2022	Laboratorio Central de Veterinaria	Istituto Zooprofilattico Sperimentale delle Venezie	Ruano, M.J.; Rocha, A.; Sanchez, A.; Aguero, M; Barbierato, G.; Zecchin, B.; Fusaro, A.; Schivo, A.; Salviato, A.; Palumbo, E.; Giussani, E.; Monne, I.; Terregino, C.
EPI1998202	HA	Spain	2022-Jan-15	EPI_ISL_11259291	A/turkey/Spain/140-38_22VIR2142-19/2022	Laboratorio Central de Veterinaria	Istituto Zooprofilattico Sperimentale delle Venezie	Ruano, M.J.; Rocha, A.; Sanchez, A.; Aguero, M; Barbierato, G.; Zecchin, B.; Fusaro, A.; Schivo, A.; Salviato, A.; Palumbo, E.; Giussani, E.; Monne, I.; Terregino, C.
EPI1998025	HA	Ireland	2021-Nov-19	EPI_ISL_11259269	A/turkey/Ireland/033674_22VIR1325-19/2021	Central Veterinary Research Laboratory	Istituto Zooprofilattico Sperimentale delle Venezie	Byrne, C.; Garcia, K.; Cuartero, L.G.; Barbierato, G.; Zecchin, B.; Fusaro, A.; Schivo, A.; Salviato, A.; Palumbo, E.; Giussani, E.; Monne, I.; Terregino, C.
EPI1998009	HA	Ireland	2021-Dec-06	EPI_ISL_11259267	A/turkey/Ireland/035425_22VIR1325-17/2021	Central Veterinary Research Laboratory	Istituto Zooprofilattico Sperimentale delle Venezie	Byrne, C.; Garcia, K.; Cuartero, L.G.; Barbierato, G.; Zecchin, B.; Fusaro, A.; Schivo, A.; Salviato, A.; Palumbo, E.; Giussani, E.; Monne, I.; Terregino, C.
EPI1962057	HA	Italy	2021-Dec-27	EPI_ISL_8882201	A/turkey/Italy/21VIR11803-1/2021	Istituto Zooprofilattico Sperimentale delle Venezie, EU/OIE/Reference Laboratory and FAO Reference Centre for AI and ND	Istituto Zooprofilattico Sperimentale delle Venezie	Barbierato, G.; Zecchin, B.; Fusaro, A.; Schivo, A.; Salviato, A.; Palumbo, E.; Giussani, E.; Monne, I.; Terregino, C.
EPI1962049	HA	Italy	2021-Dec-13	EPI_ISL_8882187	A/turkey/Italy/21VIR11053-1/2021	Istituto Zooprofilattico Sperimentale delle Venezie, EU/OIE/Reference Laboratory and FAO Reference Centre for AI and ND	Istituto Zooprofilattico Sperimentale delle Venezie	Barbierato, G.; Zecchin, B.; Fusaro, A.; Schivo, A.; Salviato, A.; Palumbo, E.; Giussani, E.; Monne, I.; Terregino, C.
EPI2841698	HA	Belgium	2023-Aug-07	EPI_ISL_18647514	A/Rissa_tridactyla/Belgium/07522_0001/2023	Sciensano - Animal Infectious Diseases	Sciensano, Department of Animal Infectious Diseases	Van Borm, Steven; Roupie, Virginie; Hostyn, Pierre; Mathijs, Elisabeth; Lambrecht, Benedicte; Steensels, Mieke
EPI2689430	HA	United States	2022-Aug-12	EPI_ISL_18107016	A/black vulture/Georgia/CEIRR-569/2022			Poulson,R., Stallknecht,D., Rubrum,A., Jeevan,T., Walker,D.; Webby,R.
EPI2582781	HA	Croatia	2023-May-15	EPI_ISL_17762861	A/common tern/Croatia/44-1/2023	Croatian Veterinary Institute, Poultry Centre	Croatian Veterinary Institute	Savić, Vladimir; Pastori, Ambra; Zecchin, Bianca; Fusaro, Alice; Schivo, Alessia; Salviato, Annalisa; Palumbo, Elisa; Giussani, Edoardo; Monne, Isabella; Terregino, Calogero
EPI2247236	HA	Canada	2022-Apr-28	EPI_ISL_16189977	A/Great Horned Owl/AB/FAV-0505-30/2022	Alberta Agriculture and Forestry, Government of Alberta	Canadian Food Inspection Agency	Alkie, Tamiru; Hicks, Mark; Pybuse, Margo J; Xu, Wanhong; Hisanaga, Tamiko; Suderman, Suderman; Koziuk, Janice; Kruczkiewicz, Peter; Nguyen, Hoang Hai; Fisher, Mathew; Lung, Oliver; Berhane, Yohannes
EPI2222196	HA	Croatia	2022-Nov-10	EPI_ISL_15895378	A/peafowl/ Croatia/123/2022	Croatian Veterinary Institute, Poultry Centre	Croatian Veterinary Institute	Savić, Vladimir; Pastori, Ambra; Zecchin, Bianca; Fusaro, Alice; Schivo, Alessia; Salviato, Annalisa; Palumbo, Elisa; Giussani, Edoardo; Monne, Isabella; Terregino, Calogero
EPI2220677	HA	Spain	2022-Aug-25	EPI_ISL_15878549	A/White_stork/Spain/3438-3_22VIR10586-7/2022	Laboratorio Central de Veterinaria	Istituto Zooprofilattico Sperimentale delle Venezie	Ruano, M.J.; Rocha, A.; Sanchez, A.; Aguero, M; Barbierato, G.; Zecchin, B.; Fusaro, A.; Schivo, A.; Salviato, A.; Palumbo, E.; Giussani, E.; Pastori, A.; Monne, I.; Terregino, C.
EPI2220669	HA	Spain	2022-Sep-15	EPI_ISL_15878548	A/Northern_gannet/Spain/3372-12_22VIR10586-6/2022	Laboratorio Central de Veterinaria	Istituto Zooprofilattico Sperimentale delle Venezie	Ruano, M.J.; Rocha, A.; Sanchez, A.; Aguero, M; Barbierato, G.; Zecchin, B.; Fusaro, A.; Schivo, A.; Salviato, A.; Palumbo, E.; Giussani, E.; Pastori, A.; Monne, I.; Terregino, C.
EPI2220653	HA	Spain	2022-Sep-19	EPI_ISL_15878546	A/laying_hen/Spain/3232-37_22VIR10586-4/2022	Laboratorio Central de Veterinaria	Istituto Zooprofilattico Sperimentale delle Venezie	Ruano, M.J.; Rocha, A.; Sanchez, A.; Aguero, M; Barbierato, G.; Zecchin, B.; Fusaro, A.; Schivo, A.; Salviato, A.; Palumbo, E.; Giussani, E.; Pastori, A.; Monne, I.; Terregino, C.
EPI2220645	HA	Spain	2022-Sep-19	EPI_ISL_15878545	A/laying_hen/Spain/3232-35_22VIR10586-3/2022	Laboratorio Central de Veterinaria	Istituto Zooprofilattico Sperimentale delle Venezie	Ruano, M.J.; Rocha, A.; Sanchez, A.; Aguero, M; Barbierato, G.; Zecchin, B.; Fusaro, A.; Schivo, A.; Salviato, A.; Palumbo, E.; Giussani, E.; Pastori, A.; Monne, I.; Terregino, C.
EPI2220637	HA	Spain	2022-Sep-09	EPI_ISL_15878544	A/laying_hen/Spain/3135-41_22VIR10586-2/2022	Laboratorio Central de Veterinaria	Istituto Zooprofilattico Sperimentale delle Venezie	Ruano, M.J.; Rocha, A.; Sanchez, A.; Aguero, M; Barbierato, G.; Zecchin, B.; Fusaro, A.; Schivo, A.; Salviato, A.; Palumbo, E.; Giussani, E.; Pastori, A.; Monne, I.; Terregino, C.
EPI2220629	HA	Spain	2022-Sep-09	EPI_ISL_15878543	A/laying_hen/Spain/3135-17_22VIR10586-1/2022	Laboratorio Central de Veterinaria	Istituto Zooprofilattico Sperimentale delle Venezie	Ruano, M.J.; Rocha, A.; Sanchez, A.; Aguero, M; Barbierato, G.; Zecchin, B.; Fusaro, A.; Schivo, A.; Salviato, A.; Palumbo, E.; Giussani, E.; Pastori, A.; Monne, I.; Terregino, C.
EPI2218159	HA	Belgium	2022-Oct-24	EPI_ISL_15812864	A/mixed_domestic_Phasianidae/Belgium/12102_0001/2022	Sciensano - Animal Infectious Diseases	Sciensano, Department of Animal Infectious Diseases	Van Borm, Steven; Roupie, Virginie; Lambrecht, Benedicte; Steensels, Mieke
EPI2076365	HA	United Kingdom	2022-Mar-02	EPI_ISL_13486857	A/goose/Scotland/022634/2022	Animal and Plant Health Agency (APHA)	Animal and Plant Health Agency (APHA)
EPI2076357	HA	United Kingdom	2022-Mar-02	EPI_ISL_13486844	A/goose/Scotland/022633/2022	Animal and Plant Health Agency (APHA)	Animal and Plant Health Agency (APHA)
EPI2075690	HA	United Kingdom	2022-May-10	EPI_ISL_13453571	A/gannet/Scotland/3/2022	Animal and Plant Health Agency (APHA)	Animal and Plant Health Agency (APHA)
EPI2075682	HA	United Kingdom	2022-Apr-29	EPI_ISL_13453570	A/great_skua/Scotland/5/2022	Animal and Plant Health Agency (APHA)	Animal and Plant Health Agency (APHA)
EPI2075674	HA	United Kingdom	2022-Apr-26	EPI_ISL_13453569	A/tawny_owl/England/113433/2022	Animal and Plant Health Agency (APHA)	Animal and Plant Health Agency (APHA)
EPI2015069	HA	Denmark	2021-Oct-28	EPI_ISL_11798577	A/gray_heron/Denmark/24326-1.02/2021-10-28	Statens Serumm Institute	Statens Serum Institute	Charlotte Hjulsager, Yuan Liang
EPI1998410	HA	Spain	2022-Jan-17	EPI_ISL_11259317	A/stork/Spain/234-2_22VIR2142-7/2022	Laboratorio Central de Veterinaria	Istituto Zooprofilattico Sperimentale delle Venezie	Ruano, M.J.; Rocha, A.; Sanchez, A.; Aguero, M; Barbierato, G.; Zecchin, B.; Fusaro, A.; Schivo, A.; Salviato, A.; Palumbo, E.; Giussani, E.; Monne, I.; Terregino, C.
EPI1998378	HA	Spain	2022-Jan-11	EPI_ISL_11259313	A/gray_heron/Spain/88-2_22VIR2142-3/2022	Laboratorio Central de Veterinaria	Istituto Zooprofilattico Sperimentale delle Venezie	Ruano, M.J.; Rocha, A.; Sanchez, A.; Aguero, M; Barbierato, G.; Zecchin, B.; Fusaro, A.; Schivo, A.; Salviato, A.; Palumbo, E.; Giussani, E.; Monne, I.; Terregino, C.
EPI1998194	HA	Spain	2022-Feb-22	EPI_ISL_11259290	A/stork/Spain/729-1_22VIR2142-18/2022	Laboratorio Central de Veterinaria	Istituto Zooprofilattico Sperimentale delle Venezie	Ruano, M.J.; Rocha, A.; Sanchez, A.; Aguero, M; Barbierato, G.; Zecchin, B.; Fusaro, A.; Schivo, A.; Salviato, A.; Palumbo, E.; Giussani, E.; Monne, I.; Terregino, C.
EPI1998106	HA	Ireland	2021-Nov-15	EPI_ISL_11259279	A/greylag_goose/Ireland/032969_22VIR1325-6/2021	Central Veterinary Research Laboratory	Istituto Zooprofilattico Sperimentale delle Venezie	Byrne, C.; Garcia, K.; Cuartero, L.G.; Barbierato, G.; Zecchin, B.; Fusaro, A.; Schivo, A.; Salviato, A.; Palumbo, E.; Giussani, E.; Monne, I.; Terregino, C.
EPI1998098	HA	Ireland	2021-Nov-12	EPI_ISL_11259278	A/magpie/Ireland/032958_22VIR1325-5/2021	Central Veterinary Research Laboratory	Istituto Zooprofilattico Sperimentale delle Venezie	Byrne, C.; Garcia, K.; Cuartero, L.G.; Barbierato, G.; Zecchin, B.; Fusaro, A.; Schivo, A.; Salviato, A.; Palumbo, E.; Giussani, E.; Monne, I.; Terregino, C.
EPI1998090	HA	Ireland	2021-Nov-12	EPI_ISL_11259277	A/whooper_swan/Ireland/032960_22VIR1325-4/2021	Central Veterinary Research Laboratory	Istituto Zooprofilattico Sperimentale delle Venezie	Byrne, C.; Garcia, K.; Cuartero, L.G.; Barbierato, G.; Zecchin, B.; Fusaro, A.; Schivo, A.; Salviato, A.; Palumbo, E.; Giussani, E.; Monne, I.; Terregino, C.
EPI1998082	HA	Ireland	2021-Nov-10	EPI_ISL_11259276	A/peregrine_falcon/Ireland/032476_22VIR1325-3/2021	Central Veterinary Research Laboratory	Istituto Zooprofilattico Sperimentale delle Venezie	Byrne, C.; Garcia, K.; Cuartero, L.G.; Barbierato, G.; Zecchin, B.; Fusaro, A.; Schivo, A.; Salviato, A.; Palumbo, E.; Giussani, E.; Monne, I.; Terregino, C.
EPI1998074	HA	Ireland	2021-Nov-09	EPI_ISL_11259275	A/whooper_swan/Ireland/032444_22VIR1325-2/2021	Central Veterinary Research Laboratory	Istituto Zooprofilattico Sperimentale delle Venezie	Byrne, C.; Garcia, K.; Cuartero, L.G.; Barbierato, G.; Zecchin, B.; Fusaro, A.; Schivo, A.; Salviato, A.; Palumbo, E.; Giussani, E.; Monne, I.; Terregino, C.
EPI1998066	HA	Ireland	2021-Nov-03	EPI_ISL_11259274	A/white-tailed_eagle/Ireland/032034_22VIR1325-23/2021	Central Veterinary Research Laboratory	Istituto Zooprofilattico Sperimentale delle Venezie	Byrne, C.; Garcia, K.; Cuartero, L.G.; Barbierato, G.; Zecchin, B.; Fusaro, A.; Schivo, A.; Salviato, A.; Palumbo, E.; Giussani, E.; Monne, I.; Terregino, C.
EPI1998050	HA	Ireland	2021-Nov-29	EPI_ISL_11259272	A/layer/Ireland/034424_22VIR1325-21/2021	Central Veterinary Research Laboratory	Istituto Zooprofilattico Sperimentale delle Venezie	Byrne, C.; Garcia, K.; Cuartero, L.G.; Barbierato, G.; Zecchin, B.; Fusaro, A.; Schivo, A.; Salviato, A.; Palumbo, E.; Giussani, E.; Monne, I.; Terregino, C.
EPI1998033	HA	Ireland	2021-Nov-08	EPI_ISL_11259270	A/mute_swan/Ireland/032363_22VIR1325-1/2021	Central Veterinary Research Laboratory	Istituto Zooprofilattico Sperimentale delle Venezie	Byrne, C.; Garcia, K.; Cuartero, L.G.; Barbierato, G.; Zecchin, B.; Fusaro, A.; Schivo, A.; Salviato, A.; Palumbo, E.; Giussani, E.; Monne, I.; Terregino, C.
EPI1997993	HA	Ireland	2022-Jan-05	EPI_ISL_11259265	A/peregrine_falcon/Ireland/000191_22VIR1325-15/2022	Central Veterinary Research Laboratory	Istituto Zooprofilattico Sperimentale delle Venezie	Byrne, C.; Garcia, K.; Cuartero, L.G.; Barbierato, G.; Zecchin, B.; Fusaro, A.; Schivo, A.; Salviato, A.; Palumbo, E.; Giussani, E.; Monne, I.; Terregino, C.
EPI1997985	HA	Ireland	2021-Nov-15	EPI_ISL_11259264	A/mute_swan/Ireland/033169_22VIR1325-14/2021	Central Veterinary Research Laboratory	Istituto Zooprofilattico Sperimentale delle Venezie	Byrne, C.; Garcia, K.; Cuartero, L.G.; Barbierato, G.; Zecchin, B.; Fusaro, A.; Schivo, A.; Salviato, A.; Palumbo, E.; Giussani, E.; Monne, I.; Terregino, C.
EPI1970954	HA	Netherlands	2021-Dec-30	EPI_ISL_9439410	A/grey heron/Netherlands/22000049-002/2021	Wageningen Bioveterinary Research	Wageningen Bioveterinary Research	Beerens, Nancy; Harders, Frank; Pritz-Verschuren, Sylvia; Roose, Marit; Venema, Sandra; Germeraad, Evelien; Engelsma, Marc; Heutink, Rene
EPI1962134	HA	Italy	2021-Dec-15	EPI_ISL_8882218	A/seagull/Italy/21VIR11259-12/2021	Istituto Zooprofilattico Sperimentale delle Venezie, EU/OIE/Reference Laboratory and FAO Reference Centre for AI and ND	Istituto Zooprofilattico Sperimentale delle Venezie	Barbierato, G.; Zecchin, B.; Fusaro, A.; Schivo, A.; Salviato, A.; Palumbo, E.; Giussani, E.; Monne, I.; Terregino, C.
EPI1962121	HA	Italy	2021-Dec-27	EPI_ISL_8882216	A/buzzard/Italy/21VIR11899-5/2021	Istituto Zooprofilattico Sperimentale delle Venezie, EU/OIE/Reference Laboratory and FAO Reference Centre for AI and ND	Istituto Zooprofilattico Sperimentale delle Venezie	Barbierato, G.; Zecchin, B.; Fusaro, A.; Schivo, A.; Salviato, A.; Palumbo, E.; Giussani, E.; Monne, I.; Terregino, C.
EPI1962113	HA	Italy	2021-Dec-27	EPI_ISL_8882215	A/owl/Italy/21VIR11899-1/2021	Istituto Zooprofilattico Sperimentale delle Venezie, EU/OIE/Reference Laboratory and FAO Reference Centre for AI and ND	Istituto Zooprofilattico Sperimentale delle Venezie	Barbierato, G.; Zecchin, B.; Fusaro, A.; Schivo, A.; Salviato, A.; Palumbo, E.; Giussani, E.; Monne, I.; Terregino, C.
EPI1962105	HA	Italy	2021-Dec-09	EPI_ISL_8882214	A/heron/Italy/21VIR10998-1/2021	Istituto Zooprofilattico Sperimentale delle Venezie, EU/OIE/Reference Laboratory and FAO Reference Centre for AI and ND	Istituto Zooprofilattico Sperimentale delle Venezie	Barbierato, G.; Zecchin, B.; Fusaro, A.; Schivo, A.; Salviato, A.; Palumbo, E.; Giussani, E.; Monne, I.; Terregino, C.
EPI1962097	HA	Italy	2021-Dec-15	EPI_ISL_8882213	A/seagull/Italy/21VIR11259-10/2021	Istituto Zooprofilattico Sperimentale delle Venezie, EU/OIE/Reference Laboratory and FAO Reference Centre for AI and ND	Istituto Zooprofilattico Sperimentale delle Venezie	Barbierato, G.; Zecchin, B.; Fusaro, A.; Schivo, A.; Salviato, A.; Palumbo, E.; Giussani, E.; Monne, I.; Terregino, C.
EPI1962089	HA	Italy	2021-Dec-01	EPI_ISL_8882212	A/cignus_olor/Italy/IZSLT_21VIR10529-1/2021	Istituto Zooprofilattico Sperimentale delle Venezie, EU/OIE/Reference Laboratory and FAO Reference Centre for AI and ND	Istituto Zooprofilattico Sperimentale delle Venezie	Barbierato, G.; Zecchin, B.; Fusaro, A.; Schivo, A.; Salviato, A.; Palumbo, E.; Giussani, E.; Monne, I.; Terregino, C.
EPI1962073	HA	Italy	2021-Nov-29	EPI_ISL_8882210	A/seagull/Italy/21VIR10481-2/2021	Istituto Zooprofilattico Sperimentale delle Venezie, EU/OIE/Reference Laboratory and FAO Reference Centre for AI and ND	Istituto Zooprofilattico Sperimentale delle Venezie	Barbierato, G.; Zecchin, B.; Fusaro, A.; Schivo, A.; Salviato, A.; Palumbo, E.; Giussani, E.; Monne, I.; Terregino, C.
EPI1962065	HA	Italy	2021-Dec-13	EPI_ISL_8882209	A/little_owl/Italy/21VIR11382-1/2021	Istituto Zooprofilattico Sperimentale delle Venezie, EU/OIE/Reference Laboratory and FAO Reference Centre for AI and ND	Istituto Zooprofilattico Sperimentale delle Venezie	Barbierato, G.; Zecchin, B.; Fusaro, A.; Schivo, A.; Salviato, A.; Palumbo, E.; Giussani, E.; Monne, I.; Terregino, C.
EPI3007164	HA	Japan	2024-Jan-26	EPI_ISL_18876663	A/carrion crow/Hokkaido/B081/2024	Graduate School of Veterinary Medicine, Hokkaido University	Graduate School of Veterinary Medicine, Hokkaido University	Yoshihiro, Sakoda; Norikazu, Isoda; Takahiro, Hiono; Yik Lim, Hew
EPI3007156	HA	Japan	2024-Jan-18	EPI_ISL_18876662	A/carrion crow/Hokkaido/B079/2024	Graduate School of Veterinary Medicine, Hokkaido University	Graduate School of Veterinary Medicine, Hokkaido University	Yoshihiro, Sakoda; Norikazu, Isoda; Takahiro, Hiono; Yik Lim, Hew
EPI3007148	HA	Japan	2024-Jan-17	EPI_ISL_18876661	A/large-billed crow/Hokkaido/B078/2024	Graduate School of Veterinary Medicine, Hokkaido University	Graduate School of Veterinary Medicine, Hokkaido University	Yoshihiro, Sakoda; Norikazu, Isoda; Takahiro, Hiono; Yik Lim, Hew
EPI2904751	HA	Netherlands	2023-Dec-21	EPI_ISL_18746298	A/Eurasian Wigeon/Netherlands/9/2023	Erasmus Medical Center	Erasmus Medical Center
EPI2904500	HA	Germany	2023-Nov-18	EPI_ISL_18745082	A/barn owl/Germany-NI/2023AI09096/2023	Friedrich-Loeffler-Institut	Friedrich-Loeffler-Institut
EPI2904484	HA	Germany	2023-Nov-29	EPI_ISL_18745080	A/turkey/Germany-NI/2023AI09089/2023	Friedrich-Loeffler-Institut	Friedrich-Loeffler-Institut
EPI2904476	HA	Germany	2023-Nov-27	EPI_ISL_18745079	A/peregrine falcon/Germany-HH/2023AI09076/2023	Friedrich-Loeffler-Institut	Friedrich-Loeffler-Institut
EPI2904468	HA	Germany	2023-Nov-28	EPI_ISL_18745078	A/turkey/Germany-BB/2023AI09073/2023	Friedrich-Loeffler-Institut	Friedrich-Loeffler-Institut
EPI2904460	HA	Germany	2023-Nov-24	EPI_ISL_18745077	A/chicken/Germany-SH/2023AI09050/2023	Friedrich-Loeffler-Institut	Friedrich-Loeffler-Institut
EPI2893419	HA	Netherlands	2023-Mar-14	EPI_ISL_18729430	A/Common Buzzard/Netherlands/1/2023	Erasmus Medical Center	Erasmus Medical Center	Vuong,O; Thewessen, S; Bellido-Martin, A.B.; Fouchier, R.A.M.
EPI2893411	HA	Netherlands	2023-Nov-27	EPI_ISL_18729429	A/Eurasian Wigeon/Netherlands/8/2023	Erasmus Medical Center	Erasmus Medical Center	Vuong,O; Thewessen, S; Bellido-Martin, A.B.; Fouchier, R.A.M.
EPI2893403	HA	Netherlands	2023-Nov-27	EPI_ISL_18729428	A/Eurasian Wigeon/Netherlands/7/2023	Erasmus Medical Center	Erasmus Medical Center	Vuong,O; Thewessen, S; Bellido-Martin, A.B.; Fouchier, R.A.M.
EPI2893395	HA	Netherlands	2023-Nov-27	EPI_ISL_18729427	A/Eurasian Wigeon/Netherlands/6/2023	Erasmus Medical Center	Erasmus Medical Center	Vuong,O; Thewessen, S; Bellido-Martin, A.B.; Fouchier, R.A.M.
EPI2893387	HA	Netherlands	2023-Nov-27	EPI_ISL_18729401	A/Eurasian Wigeon/Netherlands/5/2023	Erasmus Medical Center	Erasmus Medical Center	Vuong,O; Thewessen, S; Bellido-Martin, A.B.; Fouchier, R.A.M.
EPI2893379	HA	Netherlands	2023-Nov-27	EPI_ISL_18729400	A/Eurasian Wigeon/Netherlands/4/2023	Erasmus Medical Center	Erasmus Medical Center	Vuong,O; Thewessen, S; Bellido-Martin, A.B.; Fouchier, R.A.M.
EPI2893371	HA	Netherlands	2023-Nov-27	EPI_ISL_18729387	A/Eurasian Wigeon/Netherlands/3/2023	Erasmus Medical Center	Erasmus Medical Center	Vuong,O; Thewessen, S; Bellido-Martin, A.B.; Fouchier, R.A.M.
EPI2893363	HA	Netherlands	2023-Nov-27	EPI_ISL_18729386	A/Eurasian Wigeon/Netherlands/2/2023	Erasmus Medical Center	Erasmus Medical Center	Vuong,O; Thewessen, S; Bellido-Martin, A.B.; Fouchier, R.A.M.
EPI2893355	HA	Netherlands	2023-Nov-27	EPI_ISL_18729385	A/Eurasian Wigeon/Netherlands/1/2023	Erasmus Medical Center	Erasmus Medical Center	Vuong,O; Thewessen, S; Bellido-Martin, A.B.; Fouchier, R.A.M.
EPI2870186	HA	United States	2023-Oct-22	EPI_ISL_18697727	A/turkey/Iowa/23-032139-002/2023	National Veterinary Services Laboratories - USDA	National Veterinary Services Laboratories - USDA	Franzen,Kerrie;Love,Emily;Ozella,Mikaela;Killian,Mary;Lantz,Kristina;Stuber,Tod;Hicks,Jessica;Norris,Cameron
EPI2870178	HA	United States	2023-Oct-22	EPI_ISL_18697726	A/turkey/Iowa/23-032139-001/2023	National Veterinary Services Laboratories - USDA	National Veterinary Services Laboratories - USDA	Franzen,Kerrie;Love,Emily;Ozella,Mikaela;Killian,Mary;Lantz,Kristina;Stuber,Tod;Hicks,Jessica;Norris,Cameron
EPI2870170	HA	United States	2023-Oct-22	EPI_ISL_18697725	A/chicken/Iowa/23-032138-002/2023	National Veterinary Services Laboratories - USDA	National Veterinary Services Laboratories - USDA	Franzen,Kerrie;Love,Emily;Ozella,Mikaela;Killian,Mary;Lantz,Kristina;Stuber,Tod;Hicks,Jessica;Norris,Cameron
EPI2870162	HA	United States	2023-Oct-22	EPI_ISL_18697724	A/chicken/Iowa/23-032138-001/2023	National Veterinary Services Laboratories - USDA	National Veterinary Services Laboratories - USDA	Franzen,Kerrie;Love,Emily;Ozella,Mikaela;Killian,Mary;Lantz,Kristina;Stuber,Tod;Hicks,Jessica;Norris,Cameron
EPI2870154	HA	United States	2023-Oct-25	EPI_ISL_18697723	A/pheasant/Alabama/23-032820-001/2023	National Veterinary Services Laboratories - USDA	National Veterinary Services Laboratories - USDA	Franzen,Kerrie;Love,Emily;Ozella,Mikaela;Killian,Mary;Lantz,Kristina;Stuber,Tod;Hicks,Jessica;Norris,Cameron
EPI2870146	HA	United States	2023-Oct-24	EPI_ISL_18697722	A/turkey/California/23-032623-001/2023	National Veterinary Services Laboratories - USDA	National Veterinary Services Laboratories - USDA	Franzen,Kerrie;Love,Emily;Ozella,Mikaela;Killian,Mary;Lantz,Kristina;Stuber,Tod;Hicks,Jessica;Norris,Cameron
EPI2870138	HA	United States	2023-Oct-19	EPI_ISL_18697721	A/turkey/Iowa/23-032005-002/2023	National Veterinary Services Laboratories - USDA	National Veterinary Services Laboratories - USDA	Franzen,Kerrie;Love,Emily;Ozella,Mikaela;Killian,Mary;Lantz,Kristina;Stuber,Tod;Hicks,Jessica;Norris,Cameron
EPI2870130	HA	United States	2023-Oct-19	EPI_ISL_18697720	A/turkey/Iowa/23-032005-001/2023	National Veterinary Services Laboratories - USDA	National Veterinary Services Laboratories - USDA	Franzen,Kerrie;Love,Emily;Ozella,Mikaela;Killian,Mary;Lantz,Kristina;Stuber,Tod;Hicks,Jessica;Norris,Cameron
EPI2870122	HA	United States	2023-Oct-17	EPI_ISL_18697719	A/chicken/Oregon/23-031852-001/2023	National Veterinary Services Laboratories - USDA	National Veterinary Services Laboratories - USDA	Franzen,Kerrie;Love,Emily;Ozella,Mikaela;Killian,Mary;Lantz,Kristina;Stuber,Tod;Hicks,Jessica;Norris,Cameron
EPI2318017	HA	Japan	2022-Nov-20	EPI_ISL_16698576	A/red-crowned crane/Hokkaido/20221120001/2022	National Institute for Environmental Studies	Graduate School of Veterinary Medicine, Hokkaido University	Manabu, Onuma; Kei, Nabeshima; Atsushi, Haga; Hisako, Honjo; Misako, Yokoyama; Yoshihiro, Sakoda; Norikazu, Isoda; Takahiro, Hiono; Hew, Yik Lim
EPI2310036	HA	Venezuela, Bolivarian Republic of	2022-Dec-12	EPI_ISL_16631973	A/Pelican/Venezuela/Inf9/2022	Instituto Nacional de Salud Agrícola Integral	Instituto Venezolano de investigaciones Científicas	Loureiro, Carmen Luisa; Jaspe, Rossana C; Sulbaran, Yoneira F; Garzaro, Domingo J; Alarcon, Victor; Brett, Mariela; Rodríguez, Lieska; D´Angelo, Pierina; Hernández, Carlos; Rodríguez, Nardraka; Alcazar, Wilmer; Borges, Gilberto; Ytriago, Ernys; Rangel, Hector R; Pujol, Flor H
EPI2260870	HA	United States	2022-Nov-16	EPI_ISL_16271865	A/domestic goose/Kentucky/22-037028-001/2022	National Veterinary Services Laboratories - USDA	National Veterinary Services Laboratories - USDA	Chinh,Thanh;Love, Emily;Franzen,Kerrie;Killian,Mary;Koster,Leo;Lantz,Kristina;Stuber,Tod;Hicks,Jessica
EPI2260862	HA	United States	2022-Nov-04	EPI_ISL_16271864	A/chicken/Wyoming/22-035581-001/2022	National Veterinary Services Laboratories - USDA	National Veterinary Services Laboratories - USDA	Chinh,Thanh;Love, Emily;Franzen,Kerrie;Killian,Mary;Koster,Leo;Lantz,Kristina;Stuber,Tod;Hicks,Jessica
EPI2260854	HA	United States	2022-Nov-04	EPI_ISL_16271863	A/chicken/Wyoming/22-035580-001/2022	National Veterinary Services Laboratories - USDA	National Veterinary Services Laboratories - USDA	Chinh,Thanh;Love, Emily;Franzen,Kerrie;Killian,Mary;Koster,Leo;Lantz,Kristina;Stuber,Tod;Hicks,Jessica
EPI2260846	HA	United States	2022-Nov-04	EPI_ISL_16271862	A/chicken/Wyoming/22-035579-001/2022	National Veterinary Services Laboratories - USDA	National Veterinary Services Laboratories - USDA	Chinh,Thanh;Love, Emily;Franzen,Kerrie;Killian,Mary;Koster,Leo;Lantz,Kristina;Stuber,Tod;Hicks,Jessica
EPI2260838	HA	United States	2022-Nov-14	EPI_ISL_16271861	A/Pekin duck/California/22-036722-001/2022	National Veterinary Services Laboratories - USDA	National Veterinary Services Laboratories - USDA	Chinh,Thanh;Love, Emily;Franzen,Kerrie;Killian,Mary;Koster,Leo;Lantz,Kristina;Stuber,Tod;Hicks,Jessica
EPI2260830	HA	United States	2022-Nov-08	EPI_ISL_16271860	A/chicken/Florida/22-036555-001/2022	National Veterinary Services Laboratories - USDA	National Veterinary Services Laboratories - USDA	Chinh,Thanh;Love, Emily;Franzen,Kerrie;Killian,Mary;Koster,Leo;Lantz,Kristina;Stuber,Tod;Hicks,Jessica
EPI2260822	HA	United States	2022-Nov-13	EPI_ISL_16271859	A/turkey/Minnesota/22-036547-001/2022	National Veterinary Services Laboratories - USDA	National Veterinary Services Laboratories - USDA	Chinh,Thanh;Love, Emily;Franzen,Kerrie;Killian,Mary;Koster,Leo;Lantz,Kristina;Stuber,Tod;Hicks,Jessica
EPI2260814	HA	United States	2022-Nov-11	EPI_ISL_16271858	A/chicken/Tennessee/22-036544-002/2022	National Veterinary Services Laboratories - USDA	National Veterinary Services Laboratories - USDA	Chinh,Thanh;Love, Emily;Franzen,Kerrie;Killian,Mary;Koster,Leo;Lantz,Kristina;Stuber,Tod;Hicks,Jessica
EPI2260806	HA	United States	2022-Nov-07	EPI_ISL_16271857	A/chicken/New York/22-036304-007/2022	National Veterinary Services Laboratories - USDA	National Veterinary Services Laboratories - USDA	Chinh,Thanh;Love, Emily;Franzen,Kerrie;Killian,Mary;Koster,Leo;Lantz,Kristina;Stuber,Tod;Hicks,Jessica
EPI2260798	HA	United States	2022-Nov-07	EPI_ISL_16271856	A/Muscovy duck/New York/22-036304-003/2022	National Veterinary Services Laboratories - USDA	National Veterinary Services Laboratories - USDA	Chinh,Thanh;Love, Emily;Franzen,Kerrie;Killian,Mary;Koster,Leo;Lantz,Kristina;Stuber,Tod;Hicks,Jessica
EPI2260790	HA	United States	2022-Nov-09	EPI_ISL_16271855	A/domestic goose/Tennessee/22-036130-001/2022	National Veterinary Services Laboratories - USDA	National Veterinary Services Laboratories - USDA	Chinh,Thanh;Love, Emily;Franzen,Kerrie;Killian,Mary;Koster,Leo;Lantz,Kristina;Stuber,Tod;Hicks,Jessica
EPI2260782	HA	United States	2022-Nov-08	EPI_ISL_16271854	A/chicken/North Dakota/22-036126-001/2022	National Veterinary Services Laboratories - USDA	National Veterinary Services Laboratories - USDA	Chinh,Thanh;Love, Emily;Franzen,Kerrie;Killian,Mary;Koster,Leo;Lantz,Kristina;Stuber,Tod;Hicks,Jessica
EPI2260774	HA	United States	2022-Nov-08	EPI_ISL_16271853	A/pheasant/Michigan/22-036108-001/2022	National Veterinary Services Laboratories - USDA	National Veterinary Services Laboratories - USDA	Chinh,Thanh;Love, Emily;Franzen,Kerrie;Killian,Mary;Koster,Leo;Lantz,Kristina;Stuber,Tod;Hicks,Jessica
EPI2260766	HA	United States	2022-Nov-15	EPI_ISL_16271852	A/turkey/Florida/22-036768-001/2022	National Veterinary Services Laboratories - USDA	National Veterinary Services Laboratories - USDA	Chinh,Thanh;Love, Emily;Franzen,Kerrie;Killian,Mary;Koster,Leo;Lantz,Kristina;Stuber,Tod;Hicks,Jessica
EPI2260758	HA	United States	2022-Nov-14	EPI_ISL_16271851	A/chicken/Florida/22-036767-001/2022	National Veterinary Services Laboratories - USDA	National Veterinary Services Laboratories - USDA	Chinh,Thanh;Love, Emily;Franzen,Kerrie;Killian,Mary;Koster,Leo;Lantz,Kristina;Stuber,Tod;Hicks,Jessica
EPI2260750	HA	United States	2022-Nov-16	EPI_ISL_16271850	A/chicken/Florida/22-036965-001/2022	National Veterinary Services Laboratories - USDA	National Veterinary Services Laboratories - USDA	Chinh,Thanh;Love, Emily;Franzen,Kerrie;Killian,Mary;Koster,Leo;Lantz,Kristina;Stuber,Tod;Hicks,Jessica
EPI2260742	HA	United States	2022-Nov-16	EPI_ISL_16271849	A/chicken/North Carolina/22-037124-002/2022	National Veterinary Services Laboratories - USDA	National Veterinary Services Laboratories - USDA	Chinh,Thanh;Love, Emily;Franzen,Kerrie;Killian,Mary;Koster,Leo;Lantz,Kristina;Stuber,Tod;Hicks,Jessica
EPI2260726	HA	United States	2022-Nov-04	EPI_ISL_16271847	A/chicken/Wyoming/22-035578-001/2022	National Veterinary Services Laboratories - USDA	National Veterinary Services Laboratories - USDA	Chinh,Thanh;Love, Emily;Franzen,Kerrie;Killian,Mary;Koster,Leo;Lantz,Kristina;Stuber,Tod;Hicks,Jessica
EPI2260718	HA	United States	2022-Nov-03	EPI_ISL_16271846	A/chicken/New York/22-035476-001/2022	National Veterinary Services Laboratories - USDA	National Veterinary Services Laboratories - USDA	Chinh,Thanh;Love, Emily;Franzen,Kerrie;Killian,Mary;Koster,Leo;Lantz,Kristina;Stuber,Tod;Hicks,Jessica
EPI2260710	HA	United States	2022-Nov-03	EPI_ISL_16271845	A/chicken/New York/22-035475-001/2022	National Veterinary Services Laboratories - USDA	National Veterinary Services Laboratories - USDA	Chinh,Thanh;Love, Emily;Franzen,Kerrie;Killian,Mary;Koster,Leo;Lantz,Kristina;Stuber,Tod;Hicks,Jessica
EPI2260702	HA	United States	2022-Nov-03	EPI_ISL_16271844	A/Chinese ringneck pheasant/Wisconsin/22-035394-002/2022	National Veterinary Services Laboratories - USDA	National Veterinary Services Laboratories - USDA	Chinh,Thanh;Love, Emily;Franzen,Kerrie;Killian,Mary;Koster,Leo;Lantz,Kristina;Stuber,Tod;Hicks,Jessica
EPI2260694	HA	United States	2022-Nov-03	EPI_ISL_16271843	A/Chinese ringneck pheasant/Wisconsin/22-035394-001/2022	National Veterinary Services Laboratories - USDA	National Veterinary Services Laboratories - USDA	Chinh,Thanh;Love, Emily;Franzen,Kerrie;Killian,Mary;Koster,Leo;Lantz,Kristina;Stuber,Tod;Hicks,Jessica
EPI2260686	HA	United States	2022-Nov-03	EPI_ISL_16271842	A/chicken/Ohio/22-035584-001/2022	National Veterinary Services Laboratories - USDA	National Veterinary Services Laboratories - USDA	Chinh,Thanh;Love, Emily;Franzen,Kerrie;Killian,Mary;Koster,Leo;Lantz,Kristina;Stuber,Tod;Hicks,Jessica
EPI2260678	HA	United States	2022-Nov-21	EPI_ISL_16271841	A/turkey/South Dakota/22-037700-001/2022	National Veterinary Services Laboratories - USDA	National Veterinary Services Laboratories - USDA	Chinh,Thanh;Love, Emily;Franzen,Kerrie;Killian,Mary;Koster,Leo;Lantz,Kristina;Stuber,Tod;Hicks,Jessica
EPI2260670	HA	United States	2022-Nov-21	EPI_ISL_16271840	A/chicken/Oregon/22-037712-001/2022	National Veterinary Services Laboratories - USDA	National Veterinary Services Laboratories - USDA	Chinh,Thanh;Love, Emily;Franzen,Kerrie;Killian,Mary;Koster,Leo;Lantz,Kristina;Stuber,Tod;Hicks,Jessica
EPI2260662	HA	United States	2022-Nov-19	EPI_ISL_16271839	A/chicken/South Dakota/22-037701-001/2022	National Veterinary Services Laboratories - USDA	National Veterinary Services Laboratories - USDA	Chinh,Thanh;Love, Emily;Franzen,Kerrie;Killian,Mary;Koster,Leo;Lantz,Kristina;Stuber,Tod;Hicks,Jessica
EPI2260654	HA	United States	2022-Nov-20	EPI_ISL_16271838	A/turkey/Minnesota/22-037734-001/2022	National Veterinary Services Laboratories - USDA	National Veterinary Services Laboratories - USDA	Chinh,Thanh;Love, Emily;Franzen,Kerrie;Killian,Mary;Koster,Leo;Lantz,Kristina;Stuber,Tod;Hicks,Jessica
EPI2260646	HA	United States	2022-Nov-21	EPI_ISL_16271837	A/chicken/Florida/22-037745-001/2022	National Veterinary Services Laboratories - USDA	National Veterinary Services Laboratories - USDA	Chinh,Thanh;Love, Emily;Franzen,Kerrie;Killian,Mary;Koster,Leo;Lantz,Kristina;Stuber,Tod;Hicks,Jessica
EPI2260638	HA	United States	2022-Nov-22	EPI_ISL_16271836	A/chicken/Tennessee/22-037736-001/2022	National Veterinary Services Laboratories - USDA	National Veterinary Services Laboratories - USDA	Chinh,Thanh;Love, Emily;Franzen,Kerrie;Killian,Mary;Koster,Leo;Lantz,Kristina;Stuber,Tod;Hicks,Jessica
EPI2260622	HA	United States	2022-Nov-22	EPI_ISL_16271834	A/turkey/South Dakota/22-037930-001/2022	National Veterinary Services Laboratories - USDA	National Veterinary Services Laboratories - USDA	Chinh,Thanh;Love, Emily;Franzen,Kerrie;Killian,Mary;Koster,Leo;Lantz,Kristina;Stuber,Tod;Hicks,Jessica
EPI2260614	HA	United States	2022-Nov-23	EPI_ISL_16271833	A/turkey/South Dakota/22-037934-001/2022	National Veterinary Services Laboratories - USDA	National Veterinary Services Laboratories - USDA	Chinh,Thanh;Love, Emily;Franzen,Kerrie;Killian,Mary;Koster,Leo;Lantz,Kristina;Stuber,Tod;Hicks,Jessica
EPI2260606	HA	United States	2022-Nov-16	EPI_ISL_16271832	A/domestic goose/Kentucky/22-037359-002/2022	National Veterinary Services Laboratories - USDA	National Veterinary Services Laboratories - USDA	Chinh,Thanh;Love, Emily;Franzen,Kerrie;Killian,Mary;Koster,Leo;Lantz,Kristina;Stuber,Tod;Hicks,Jessica
EPI2260598	HA	United States	2022-Nov-22	EPI_ISL_16271831	A/turkey/South Dakota/22-037933-001/2022	National Veterinary Services Laboratories - USDA	National Veterinary Services Laboratories - USDA	Chinh,Thanh;Love, Emily;Franzen,Kerrie;Killian,Mary;Koster,Leo;Lantz,Kristina;Stuber,Tod;Hicks,Jessica
EPI2260590	HA	United States	2022-Nov-21	EPI_ISL_16271830	A/chicken/South Dakota/22-037931-001/2022	National Veterinary Services Laboratories - USDA	National Veterinary Services Laboratories - USDA	Chinh,Thanh;Love, Emily;Franzen,Kerrie;Killian,Mary;Koster,Leo;Lantz,Kristina;Stuber,Tod;Hicks,Jessica
EPI2260582	HA	United States	2022-Nov-23	EPI_ISL_16271829	A/chicken/Alaska/22-037940-001/2022	National Veterinary Services Laboratories - USDA	National Veterinary Services Laboratories - USDA	Chinh,Thanh;Love, Emily;Franzen,Kerrie;Killian,Mary;Koster,Leo;Lantz,Kristina;Stuber,Tod;Hicks,Jessica
EPI2260574	HA	United States	2022-Nov-22	EPI_ISL_16271828	A/domestic duck/North Carolina/22-037942-001/2022	National Veterinary Services Laboratories - USDA	National Veterinary Services Laboratories - USDA	Chinh,Thanh;Love, Emily;Franzen,Kerrie;Killian,Mary;Koster,Leo;Lantz,Kristina;Stuber,Tod;Hicks,Jessica
EPI2260566	HA	United States	2022-Nov-14	EPI_ISL_16271827	A/rhea/Arizona/22-037270-002/2022	National Veterinary Services Laboratories - USDA	National Veterinary Services Laboratories - USDA	Chinh,Thanh;Love, Emily;Franzen,Kerrie;Killian,Mary;Koster,Leo;Lantz,Kristina;Stuber,Tod;Hicks,Jessica
EPI2260558	HA	United States	2022-Nov-24	EPI_ISL_16271826	A/turkey/Missouri/22-038012-001/2022	National Veterinary Services Laboratories - USDA	National Veterinary Services Laboratories - USDA	Chinh,Thanh;Love, Emily;Franzen,Kerrie;Killian,Mary;Koster,Leo;Lantz,Kristina;Stuber,Tod;Hicks,Jessica
EPI2260550	HA	United States	2022-Nov-01	EPI_ISL_16271825	A/chicken/Iowa/22-035154-002/2022	National Veterinary Services Laboratories - USDA	National Veterinary Services Laboratories - USDA	Chinh,Thanh;Love, Emily;Franzen,Kerrie;Killian,Mary;Koster,Leo;Lantz,Kristina;Stuber,Tod;Hicks,Jessica
EPI2260542	HA	United States	2022-Nov-24	EPI_ISL_16271824	A/chicken/Nebraska/22-038149-001/2022	National Veterinary Services Laboratories - USDA	National Veterinary Services Laboratories - USDA	Chinh,Thanh;Love, Emily;Franzen,Kerrie;Killian,Mary;Koster,Leo;Lantz,Kristina;Stuber,Tod;Hicks,Jessica
EPI2260534	HA	United States	2022-Nov-25	EPI_ISL_16271823	A/chicken/Nebraska/22-038152-001/2022	National Veterinary Services Laboratories - USDA	National Veterinary Services Laboratories - USDA	Chinh,Thanh;Love, Emily;Franzen,Kerrie;Killian,Mary;Koster,Leo;Lantz,Kristina;Stuber,Tod;Hicks,Jessica
EPI2260526	HA	United States	2022-Nov-16	EPI_ISL_16271822	A/chicken/Maine/22-037360-002/2022	National Veterinary Services Laboratories - USDA	National Veterinary Services Laboratories - USDA	Chinh,Thanh;Love, Emily;Franzen,Kerrie;Killian,Mary;Koster,Leo;Lantz,Kristina;Stuber,Tod;Hicks,Jessica
EPI2260518	HA	United States	2022-Nov-16	EPI_ISL_16271821	A/domestic goose/Maine/22-037360-001/2022	National Veterinary Services Laboratories - USDA	National Veterinary Services Laboratories - USDA	Chinh,Thanh;Love, Emily;Franzen,Kerrie;Killian,Mary;Koster,Leo;Lantz,Kristina;Stuber,Tod;Hicks,Jessica
EPI2260510	HA	United States	2022-Nov-16	EPI_ISL_16271820	A/domestic goose/Kentucky/22-037359-001/2022	National Veterinary Services Laboratories - USDA	National Veterinary Services Laboratories - USDA	Chinh,Thanh;Love, Emily;Franzen,Kerrie;Killian,Mary;Koster,Leo;Lantz,Kristina;Stuber,Tod;Hicks,Jessica
EPI2260502	HA	United States	2022-Nov-17	EPI_ISL_16271819	A/turkey/South Dakota/22-037357-001/2022	National Veterinary Services Laboratories - USDA	National Veterinary Services Laboratories - USDA	Chinh,Thanh;Love, Emily;Franzen,Kerrie;Killian,Mary;Koster,Leo;Lantz,Kristina;Stuber,Tod;Hicks,Jessica
EPI2260494	HA	United States	2022-Nov-19	EPI_ISL_16271818	A/turkey/South Dakota/22-037527-001/2022	National Veterinary Services Laboratories - USDA	National Veterinary Services Laboratories - USDA	Chinh,Thanh;Love, Emily;Franzen,Kerrie;Killian,Mary;Koster,Leo;Lantz,Kristina;Stuber,Tod;Hicks,Jessica
EPI2260486	HA	United States	2022-Nov-19	EPI_ISL_16271817	A/chicken/Missouri/22-037522-001/2022	National Veterinary Services Laboratories - USDA	National Veterinary Services Laboratories - USDA	Chinh,Thanh;Love, Emily;Franzen,Kerrie;Killian,Mary;Koster,Leo;Lantz,Kristina;Stuber,Tod;Hicks,Jessica
EPI2260478	HA	United States	2022-Dec-01	EPI_ISL_16271816	A/duck/Alabama/22-038970-004/2022	National Veterinary Services Laboratories - USDA	National Veterinary Services Laboratories - USDA	Chinh,Thanh;Love, Emily;Franzen,Kerrie;Killian,Mary;Koster,Leo;Lantz,Kristina;Stuber,Tod;Hicks,Jessica
EPI2260470	HA	United States	2022-Dec-01	EPI_ISL_16271815	A/chicken/Alabama/22-038970-003/2022	National Veterinary Services Laboratories - USDA	National Veterinary Services Laboratories - USDA	Chinh,Thanh;Love, Emily;Franzen,Kerrie;Killian,Mary;Koster,Leo;Lantz,Kristina;Stuber,Tod;Hicks,Jessica
EPI2260462	HA	United States	2022-Dec-01	EPI_ISL_16271814	A/goose/Alabama/22-038970-002/2022	National Veterinary Services Laboratories - USDA	National Veterinary Services Laboratories - USDA	Chinh,Thanh;Love, Emily;Franzen,Kerrie;Killian,Mary;Koster,Leo;Lantz,Kristina;Stuber,Tod;Hicks,Jessica
EPI2128886	HA	Netherlands	2022-Jul-30	EPI_ISL_14469693	A/Common Tern/Netherlands/25/2022	Erasmus Medical Center	Erasmus Medical Center
EPI2128878	HA	Netherlands	2022-Jul-29	EPI_ISL_14469692	A/Common Tern/Netherlands/24/2022	Erasmus Medical Center	Erasmus Medical Center
EPI2128870	HA	Netherlands	2022-Jul-29	EPI_ISL_14469691	A/Common Tern/Netherlands/23/2022	Erasmus Medical Center	Erasmus Medical Center
EPI2128862	HA	Netherlands	2022-Jul-29	EPI_ISL_14469690	A/Common Tern/Netherlands/22/2022	Erasmus Medical Center	Erasmus Medical Center
EPI2128854	HA	Netherlands	2022-Jul-29	EPI_ISL_14469689	A/Common Tern/Netherlands/21/2022	Erasmus Medical Center	Erasmus Medical Center
EPI2069030	HA	Sweden	2022-May-03	EPI_ISL_13338994	A/Northern goshawk/Sweden/SVA220525SZ0403/FB001672/N-2022	Swedish Veterinary Agency (SVA)	Swedish Veterinary Agency (SVA)
EPI2014197	HA	United States	2022-Mar-17	EPI_ISL_11897704	A/chicken/Iowa/22-008176-003/2022	National Veterinary Services Laboratories - USDA	National Veterinary Services Laboratories - USDA	Chinh,Thanh;Love, Emily;Franzen,Kerrie;Killian,Mary;Koster,Leo;Lantz,Kristina;Stuber,Tod;Hicks,Jessica
EPI2014189	HA	United States	2022-Mar-16	EPI_ISL_11897703	A/chicken/Kansas/22-008114-002/2022	National Veterinary Services Laboratories - USDA	National Veterinary Services Laboratories - USDA	Chinh,Thanh;Love, Emily;Franzen,Kerrie;Killian,Mary;Koster,Leo;Lantz,Kristina;Stuber,Tod;Hicks,Jessica
EPI2014181	HA	United States	2022-Mar-16	EPI_ISL_11897702	A/duck/Kansas/22-008114-001/2022	National Veterinary Services Laboratories - USDA	National Veterinary Services Laboratories - USDA	Chinh,Thanh;Love, Emily;Franzen,Kerrie;Killian,Mary;Koster,Leo;Lantz,Kristina;Stuber,Tod;Hicks,Jessica
EPI2014173	HA	United States	2022-Mar-15	EPI_ISL_11897701	A/chicken/Maine/22-008064-002/2022	National Veterinary Services Laboratories - USDA	National Veterinary Services Laboratories - USDA	Chinh,Thanh;Love, Emily;Franzen,Kerrie;Killian,Mary;Koster,Leo;Lantz,Kristina;Stuber,Tod;Hicks,Jessica
EPI2014165	HA	United States	2022-Mar-15	EPI_ISL_11897700	A/guinea fowl/Maine/22-008064-001/2022	National Veterinary Services Laboratories - USDA	National Veterinary Services Laboratories - USDA	Chinh,Thanh;Love, Emily;Franzen,Kerrie;Killian,Mary;Koster,Leo;Lantz,Kristina;Stuber,Tod;Hicks,Jessica
EPI2014157	HA	United States	2022-Mar-16	EPI_ISL_11897699	A/chicken/Delaware/22-008054-003/2022	National Veterinary Services Laboratories - USDA	National Veterinary Services Laboratories - USDA	Chinh,Thanh;Love, Emily;Franzen,Kerrie;Killian,Mary;Koster,Leo;Lantz,Kristina;Stuber,Tod;Hicks,Jessica
EPI2014149	HA	United States	2022-Mar-16	EPI_ISL_11897698	A/chicken/Delaware/22-008054-002/2022	National Veterinary Services Laboratories - USDA	National Veterinary Services Laboratories - USDA	Chinh,Thanh;Love, Emily;Franzen,Kerrie;Killian,Mary;Koster,Leo;Lantz,Kristina;Stuber,Tod;Hicks,Jessica
EPI2014141	HA	United States	2022-Mar-15	EPI_ISL_11897697	A/turkey/New Hampshire/22-007886-001/2022	National Veterinary Services Laboratories - USDA	National Veterinary Services Laboratories - USDA	Chinh,Thanh;Love, Emily;Franzen,Kerrie;Killian,Mary;Koster,Leo;Lantz,Kristina;Stuber,Tod;Hicks,Jessica
EPI2014133	HA	United States	2022-Mar-14	EPI_ISL_11897696	A/waterfowl/Nebraska/22-007805-002/2022	National Veterinary Services Laboratories - USDA	National Veterinary Services Laboratories - USDA	Chinh,Thanh;Love, Emily;Franzen,Kerrie;Killian,Mary;Koster,Leo;Lantz,Kristina;Stuber,Tod;Hicks,Jessica
EPI2014125	HA	United States	2022-Mar-14	EPI_ISL_11897695	A/chicken/Nebraska/22-007805-001/2022	National Veterinary Services Laboratories - USDA	National Veterinary Services Laboratories - USDA	Chinh,Thanh;Love, Emily;Franzen,Kerrie;Killian,Mary;Koster,Leo;Lantz,Kristina;Stuber,Tod;Hicks,Jessica
EPI2014117	HA	United States	2022-Mar-14	EPI_ISL_11897694	A/chicken/Missouri/22-007677-002/2022	National Veterinary Services Laboratories - USDA	National Veterinary Services Laboratories - USDA	Chinh,Thanh;Love, Emily;Franzen,Kerrie;Killian,Mary;Koster,Leo;Lantz,Kristina;Stuber,Tod;Hicks,Jessica
EPI2014109	HA	United States	2022-Mar-14	EPI_ISL_11897693	A/chicken/Missouri/22-007677-001/2022	National Veterinary Services Laboratories - USDA	National Veterinary Services Laboratories - USDA	Chinh,Thanh;Love, Emily;Franzen,Kerrie;Killian,Mary;Koster,Leo;Lantz,Kristina;Stuber,Tod;Hicks,Jessica
EPI2014101	HA	United States	2022-Mar-11	EPI_ISL_11897692	A/chicken/Maine/22-007582-001/2022	National Veterinary Services Laboratories - USDA	National Veterinary Services Laboratories - USDA	Chinh,Thanh;Love, Emily;Franzen,Kerrie;Killian,Mary;Koster,Leo;Lantz,Kristina;Stuber,Tod;Hicks,Jessica
EPI2014093	HA	United States	2022-Mar-13	EPI_ISL_11897691	A/chicken/Wisconsin/22-007545-002/2022	National Veterinary Services Laboratories - USDA	National Veterinary Services Laboratories - USDA	Chinh,Thanh;Love, Emily;Franzen,Kerrie;Killian,Mary;Koster,Leo;Lantz,Kristina;Stuber,Tod;Hicks,Jessica
EPI2014085	HA	United States	2022-Mar-13	EPI_ISL_11897690	A/chicken/Wisconsin/22-007545-001/2022	National Veterinary Services Laboratories - USDA	National Veterinary Services Laboratories - USDA	Chinh,Thanh;Love, Emily;Franzen,Kerrie;Killian,Mary;Koster,Leo;Lantz,Kristina;Stuber,Tod;Hicks,Jessica
EPI2014077	HA	United States	2022-Mar-11	EPI_ISL_11897689	A/turkey/South Dakota/22-007534-002/2022	National Veterinary Services Laboratories - USDA	National Veterinary Services Laboratories - USDA	Chinh,Thanh;Love, Emily;Franzen,Kerrie;Killian,Mary;Koster,Leo;Lantz,Kristina;Stuber,Tod;Hicks,Jessica
EPI2014069	HA	United States	2022-Mar-11	EPI_ISL_11897688	A/turkey/South Dakota/22-007534-001/2022	National Veterinary Services Laboratories - USDA	National Veterinary Services Laboratories - USDA	Chinh,Thanh;Love, Emily;Franzen,Kerrie;Killian,Mary;Koster,Leo;Lantz,Kristina;Stuber,Tod;Hicks,Jessica
EPI2014061	HA	United States	2022-Mar-10	EPI_ISL_11897687	A/chicken/Maine/22-007410-002/2022	National Veterinary Services Laboratories - USDA	National Veterinary Services Laboratories - USDA	Chinh,Thanh;Love, Emily;Franzen,Kerrie;Killian,Mary;Koster,Leo;Lantz,Kristina;Stuber,Tod;Hicks,Jessica
EPI2014053	HA	United States	2022-Mar-10	EPI_ISL_11897686	A/turkey/Maine/22-007410-001/2022	National Veterinary Services Laboratories - USDA	National Veterinary Services Laboratories - USDA	Chinh,Thanh;Love, Emily;Franzen,Kerrie;Killian,Mary;Koster,Leo;Lantz,Kristina;Stuber,Tod;Hicks,Jessica
EPI2014045	HA	United States	2022-Mar-09	EPI_ISL_11897685	A/poultry/Kansas/22-007391-002/2022	National Veterinary Services Laboratories - USDA	National Veterinary Services Laboratories - USDA	Chinh,Thanh;Love, Emily;Franzen,Kerrie;Killian,Mary;Koster,Leo;Lantz,Kristina;Stuber,Tod;Hicks,Jessica
EPI2014037	HA	United States	2022-Mar-09	EPI_ISL_11897684	A/poultry/Kansas/22-007391-001/2022	National Veterinary Services Laboratories - USDA	National Veterinary Services Laboratories - USDA	Chinh,Thanh;Love, Emily;Franzen,Kerrie;Killian,Mary;Koster,Leo;Lantz,Kristina;Stuber,Tod;Hicks,Jessica
EPI2014029	HA	United States	2022-Mar-09	EPI_ISL_11897683	A/guinea fowl/Illinois/22-007382-001/2022	National Veterinary Services Laboratories - USDA	National Veterinary Services Laboratories - USDA	Chinh,Thanh;Love, Emily;Franzen,Kerrie;Killian,Mary;Koster,Leo;Lantz,Kristina;Stuber,Tod;Hicks,Jessica
EPI2014021	HA	United States	2022-Mar-10	EPI_ISL_11897682	A/chicken/Iowa/22-007376-002/2022	National Veterinary Services Laboratories - USDA	National Veterinary Services Laboratories - USDA	Chinh,Thanh;Love, Emily;Franzen,Kerrie;Killian,Mary;Koster,Leo;Lantz,Kristina;Stuber,Tod;Hicks,Jessica
EPI2014013	HA	United States	2022-Mar-10	EPI_ISL_11897681	A/chicken/Iowa/22-007376-001/2022	National Veterinary Services Laboratories - USDA	National Veterinary Services Laboratories - USDA	Chinh,Thanh;Love, Emily;Franzen,Kerrie;Killian,Mary;Koster,Leo;Lantz,Kristina;Stuber,Tod;Hicks,Jessica
EPI2014005	HA	United States	2022-Mar-08	EPI_ISL_11897680	A/chicken/Maryland/22-007273-002/2022	National Veterinary Services Laboratories - USDA	National Veterinary Services Laboratories - USDA	Chinh,Thanh;Love, Emily;Franzen,Kerrie;Killian,Mary;Koster,Leo;Lantz,Kristina;Stuber,Tod;Hicks,Jessica
EPI2013997	HA	United States	2022-Mar-08	EPI_ISL_11897679	A/chicken/Maryland/22-007273-001/2022	National Veterinary Services Laboratories - USDA	National Veterinary Services Laboratories - USDA	Chinh,Thanh;Love, Emily;Franzen,Kerrie;Killian,Mary;Koster,Leo;Lantz,Kristina;Stuber,Tod;Hicks,Jessica
EPI2013989	HA	United States	2022-Mar-08	EPI_ISL_11897678	A/turkey/Missouri/22-007087-002/2022	National Veterinary Services Laboratories - USDA	National Veterinary Services Laboratories - USDA	Chinh,Thanh;Love, Emily;Franzen,Kerrie;Killian,Mary;Koster,Leo;Lantz,Kristina;Stuber,Tod;Hicks,Jessica
EPI2013981	HA	United States	2022-Mar-08	EPI_ISL_11897677	A/turkey/Missouri/22-007087-001/2022	National Veterinary Services Laboratories - USDA	National Veterinary Services Laboratories - USDA	Chinh,Thanh;Love, Emily;Franzen,Kerrie;Killian,Mary;Koster,Leo;Lantz,Kristina;Stuber,Tod;Hicks,Jessica
EPI2013973	HA	United States	2022-Mar-07	EPI_ISL_11897676	A/chicken/Maryland/22-007086-001/2022	National Veterinary Services Laboratories - USDA	National Veterinary Services Laboratories - USDA	Chinh,Thanh;Love, Emily;Franzen,Kerrie;Killian,Mary;Koster,Leo;Lantz,Kristina;Stuber,Tod;Hicks,Jessica
EPI2013965	HA	United States	2022-Mar-04	EPI_ISL_11897675	A/chicken/Maryland/22-006948-001/2022	National Veterinary Services Laboratories - USDA	National Veterinary Services Laboratories - USDA	Chinh,Thanh;Love, Emily;Franzen,Kerrie;Killian,Mary;Koster,Leo;Lantz,Kristina;Stuber,Tod;Hicks,Jessica
EPI2013957	HA	United States	2022-Mar-07	EPI_ISL_11897674	A/chicken/Delaware/22-006945-002/2022	National Veterinary Services Laboratories - USDA	National Veterinary Services Laboratories - USDA	Chinh,Thanh;Love, Emily;Franzen,Kerrie;Killian,Mary;Koster,Leo;Lantz,Kristina;Stuber,Tod;Hicks,Jessica
EPI2013949	HA	United States	2022-Mar-07	EPI_ISL_11897673	A/chicken/Delaware/22-006945-001/2022	National Veterinary Services Laboratories - USDA	National Veterinary Services Laboratories - USDA	Chinh,Thanh;Love, Emily;Franzen,Kerrie;Killian,Mary;Koster,Leo;Lantz,Kristina;Stuber,Tod;Hicks,Jessica
EPI2013941	HA	United States	2022-Mar-07	EPI_ISL_11897672	A/turkey/Missouri/22-006944-002/2022	National Veterinary Services Laboratories - USDA	National Veterinary Services Laboratories - USDA	Chinh,Thanh;Love, Emily;Franzen,Kerrie;Killian,Mary;Koster,Leo;Lantz,Kristina;Stuber,Tod;Hicks,Jessica
EPI2013933	HA	United States	2022-Mar-06	EPI_ISL_11897671	A/turkey/Iowa/22-006795-002/2022	National Veterinary Services Laboratories - USDA	National Veterinary Services Laboratories - USDA	Chinh,Thanh;Love, Emily;Franzen,Kerrie;Killian,Mary;Koster,Leo;Lantz,Kristina;Stuber,Tod;Hicks,Jessica
EPI2013925	HA	United States	2022-Mar-06	EPI_ISL_11897670	A/turkey/Iowa/22-006795-001/2022	National Veterinary Services Laboratories - USDA	National Veterinary Services Laboratories - USDA	Chinh,Thanh;Love, Emily;Franzen,Kerrie;Killian,Mary;Koster,Leo;Lantz,Kristina;Stuber,Tod;Hicks,Jessica
EPI2013917	HA	United States	2022-Mar-04	EPI_ISL_11897669	A/turkey/South Dakota/22-006792-002/2022	National Veterinary Services Laboratories - USDA	National Veterinary Services Laboratories - USDA	Chinh,Thanh;Love, Emily;Franzen,Kerrie;Killian,Mary;Koster,Leo;Lantz,Kristina;Stuber,Tod;Hicks,Jessica
EPI2013909	HA	United States	2022-Mar-04	EPI_ISL_11897668	A/turkey/South Dakota/22-006792-001/2022	National Veterinary Services Laboratories - USDA	National Veterinary Services Laboratories - USDA	Chinh,Thanh;Love, Emily;Franzen,Kerrie;Killian,Mary;Koster,Leo;Lantz,Kristina;Stuber,Tod;Hicks,Jessica
EPI2013901	HA	United States	2022-Mar-03	EPI_ISL_11897667	A/chicken/Missouri/22-006639-001/2022	National Veterinary Services Laboratories - USDA	National Veterinary Services Laboratories - USDA	Chinh,Thanh;Love, Emily;Franzen,Kerrie;Killian,Mary;Koster,Leo;Lantz,Kristina;Stuber,Tod;Hicks,Jessica
EPI2013893	HA	United States	2022-Mar-03	EPI_ISL_11897508	A/chicken/Maryland/22-006578-002/2022	National Veterinary Services Laboratories - USDA	National Veterinary Services Laboratories - USDA	Chinh,Thanh;Love, Emily;Franzen,Kerrie;Killian,Mary;Koster,Leo;Lantz,Kristina;Stuber,Tod;Hicks,Jessica
EPI2013885	HA	United States	2022-Mar-03	EPI_ISL_11897507	A/chicken/Maryland/22-006578-001/2022	National Veterinary Services Laboratories - USDA	National Veterinary Services Laboratories - USDA	Chinh,Thanh;Love, Emily;Franzen,Kerrie;Killian,Mary;Koster,Leo;Lantz,Kristina;Stuber,Tod;Hicks,Jessica
EPI2850934	HA	Canada	2022-Apr-25	EPI_ISL_18663673	A/Chicken/BC/AIVPHL-151/2022	BC Centre for Disease Control	Public Health Agency of Canada	Himsworth, Chelsea; Prystajecky,Natalie; Tyson,John; Jassem,Agatha; Kuchinski,Kevin; Coombe, Michelle; Lee,Tracy; Azana,Rob; Fung,Janet; Chan,Michael; Cheung,Branco; Caleta,Jessica; Tsang,Frankie; Yang,Kevin; Russell,Shannon; Zlosnik,James; Hoang,Linda
EPI2495649	HA	Colombia	2022-Nov-26	EPI_ISL_17353510	A/chicken/Cordoba/ICA-3499/2022	United States Department of Agriculture	United States Department of Agriculture	Kariithi,H.M., Sierra,E.U., Calderon,P.C. and Suarez,D.L.
EPI2495641	HA	Colombia	2022-Nov-01	EPI_ISL_17353509	A/chicken/Choco/ICA-3504/2022	United States Department of Agriculture	United States Department of Agriculture	Kariithi,H.M., Sierra,E.U., Calderon,P.C. and Suarez,D.L.
EPI2495633	HA	Colombia	2022-Nov-13	EPI_ISL_17353508	A/chicken/Choco/ICA-3502/2022	United States Department of Agriculture	United States Department of Agriculture	Kariithi,H.M., Sierra,E.U., Calderon,P.C. and Suarez,D.L.
EPI2495625	HA	Colombia	2022-Nov-08	EPI_ISL_17353507	A/chicken/Bolivar/ICA-3500/2022	United States Department of Agriculture	United States Department of Agriculture	Kariithi,H.M., Sierra,E.U., Calderon,P.C. and Suarez,D.L.
EPI2011648	HA	Denmark	2021-Nov-02	EPI_ISL_11798570	A/chicken/Denmark/24357-11/2021-11-02	Statens Serumm Institute	Statens Serum Institute	Charlotte Hjulsager, Yuan Liang
EPI1998370	HA	Spain	2022-Feb-16	EPI_ISL_11259312	A/chicken/Spain/649-6_22VIR2142-38/2022	Laboratorio Central de Veterinaria	Istituto Zooprofilattico Sperimentale delle Venezie	Ruano, M.J.; Rocha, A.; Sanchez, A.; Aguero, M; Barbierato, G.; Zecchin, B.; Fusaro, A.; Schivo, A.; Salviato, A.; Palumbo, E.; Giussani, E.; Monne, I.; Terregino, C.
EPI1998346	HA	Spain	2022-Feb-16	EPI_ISL_11259309	A/chicken/Spain/644-8_22VIR2142-35/2022	Laboratorio Central de Veterinaria	Istituto Zooprofilattico Sperimentale delle Venezie	Ruano, M.J.; Rocha, A.; Sanchez, A.; Aguero, M; Barbierato, G.; Zecchin, B.; Fusaro, A.; Schivo, A.; Salviato, A.; Palumbo, E.; Giussani, E.; Monne, I.; Terregino, C.
EPI1998338	HA	Spain	2022-Feb-14	EPI_ISL_11259308	A/chicken/Spain/622-8_22VIR2142-34/2022	Laboratorio Central de Veterinaria	Istituto Zooprofilattico Sperimentale delle Venezie	Ruano, M.J.; Rocha, A.; Sanchez, A.; Aguero, M; Barbierato, G.; Zecchin, B.; Fusaro, A.; Schivo, A.; Salviato, A.; Palumbo, E.; Giussani, E.; Monne, I.; Terregino, C.
EPI1998330	HA	Spain	2022-Feb-14	EPI_ISL_11259307	A/chicken/Spain/587-1_22VIR2142-33/2022	Laboratorio Central de Veterinaria	Istituto Zooprofilattico Sperimentale delle Venezie	Ruano, M.J.; Rocha, A.; Sanchez, A.; Aguero, M; Barbierato, G.; Zecchin, B.; Fusaro, A.; Schivo, A.; Salviato, A.; Palumbo, E.; Giussani, E.; Monne, I.; Terregino, C.
EPI1998314	HA	Spain	2022-Feb-11	EPI_ISL_11259305	A/chicken/Spain/564-11_22VIR2142-31/2022	Laboratorio Central de Veterinaria	Istituto Zooprofilattico Sperimentale delle Venezie	Ruano, M.J.; Rocha, A.; Sanchez, A.; Aguero, M; Barbierato, G.; Zecchin, B.; Fusaro, A.; Schivo, A.; Salviato, A.; Palumbo, E.; Giussani, E.; Monne, I.; Terregino, C.
EPI1998306	HA	Spain	2022-Feb-11	EPI_ISL_11259304	A/chicken/Spain/564-4_22VIR2142-30/2022	Laboratorio Central de Veterinaria	Istituto Zooprofilattico Sperimentale delle Venezie	Ruano, M.J.; Rocha, A.; Sanchez, A.; Aguero, M; Barbierato, G.; Zecchin, B.; Fusaro, A.; Schivo, A.; Salviato, A.; Palumbo, E.; Giussani, E.; Monne, I.; Terregino, C.
EPI1998290	HA	Spain	2022-Feb-11	EPI_ISL_11259302	A/chicken/Spain/562-1_22VIR2142-29/2022	Laboratorio Central de Veterinaria	Istituto Zooprofilattico Sperimentale delle Venezie	Ruano, M.J.; Rocha, A.; Sanchez, A.; Aguero, M; Barbierato, G.; Zecchin, B.; Fusaro, A.; Schivo, A.; Salviato, A.; Palumbo, E.; Giussani, E.; Monne, I.; Terregino, C.
EPI1998042	HA	Ireland	2021-Nov-22	EPI_ISL_11259271	A/broiler/Ireland/033734_22VIR1325-20/2021	Central Veterinary Research Laboratory	Istituto Zooprofilattico Sperimentale delle Venezie	Byrne, C.; Garcia, K.; Cuartero, L.G.; Barbierato, G.; Zecchin, B.; Fusaro, A.; Schivo, A.; Salviato, A.; Palumbo, E.; Giussani, E.; Monne, I.; Terregino, C.
EPI1980621	HA	Czech Republic	2021-Dec-22	EPI_ISL_9603929	A/chicken/Czech Republic/25690/2021	State Veterinary Institute Prague	State Veterinary Institute Prague	Alexander,Nagy;Lenka,Cernikova;Martina,Stara
EPI2540185	HA	Belgium	2023-Feb-27	EPI_ISL_17599451	A/Gallus_gallus/Belgium/01742_0001/2023	Sciensano - Animal Infectious Diseases	Sciensano, Department of Animal Infectious Diseases	Van Borm, Steven; Roupie, Virginie; Hostyn, Pierre; Mathijs, Elisabeth; Lambrecht, Benedicte; Steensels, Mieke
EPI2318000	HA	Japan	2022-Nov-06	EPI_ISL_16698477	A/chicken/Hokkaido/HU-E008/2022	Graduate School of Veterinary Medicine, Hokkaido University	Graduate School of Veterinary Medicine, Hokkaido University	Yoshihiro, Sakoda; Norikazu, Isoda; Takahiro, Hiono; Hew, Yik Lim
EPI2317992	HA	Japan	2022-Oct-27	EPI_ISL_16698060	A/chicken/Hokkaido/HU-E001/2022	Graduate School of Veterinary Medicine, Hokkaido University	Graduate School of Veterinary Medicine, Hokkaido University	Yoshihiro, Sakoda; Norikazu, Isoda; Takahiro, Hiono; Hew, Yik Lim
EPI2893639	HA	Bangladesh	2023-Jun-23	EPI_ISL_18729461	A/duck/Bangladesh/SJCEIRR-58403/2023	Center of Excellence for Influenza Research and Surveillance	Center of Excellence for Influenza Research and Surveillance	Barman,S., Turner,J.C., Hasan,M.K., Akhtar,S., Franks,J., Walker,D., Seiler,P., Mukherjee,N., Kercher,L., McKenzie,P., Feeroz,M.; Webby,R.J.
EPI2893592	HA	Bangladesh	2023-Jun-23	EPI_ISL_18729454	A/duck/Bangladesh/SJCEIRR-58401/2023	Center of Excellence for Influenza Research and Surveillance	Center of Excellence for Influenza Research and Surveillance	Barman,S., Turner,J.C., Hasan,M.K., Akhtar,S., Franks,J., Walker,D., Seiler,P., Mukherjee,N., Kercher,L., McKenzie,P., Feeroz,M.; Webby,R.J.
EPI2893528	HA	Bangladesh	2023-Jun-23	EPI_ISL_18729445	A/duck/Bangladesh/SJCEIRR-58395/2023	Center of Excellence for Influenza Research and Surveillance	Center of Excellence for Influenza Research and Surveillance	Barman,S., Turner,J.C., Hasan,M.K., Akhtar,S., Franks,J., Walker,D., Seiler,P., Mukherjee,N., Kercher,L., McKenzie,P., Feeroz,M.; Webby,R.J.
EPI2893504	HA	Bangladesh	2023-Jun-23	EPI_ISL_18729442	A/duck/Bangladesh/SJCEIRR-58400/2023	Center of Excellence for Influenza Research and Surveillance	Center of Excellence for Influenza Research and Surveillance	Barman,S., Turner,J.C., Hasan,M.K., Akhtar,S., Franks,J., Walker,D., Seiler,P., Mukherjee,N., Kercher,L., McKenzie,P., Feeroz,M.; Webby,R.J.
EPI2689623	HA	United States	2022-Sep-15	EPI_ISL_18107069	A/redhead duck/Minnesota/CEIRR-4003/2022			Poulson,R., Stallknecht,D., Rubrum,A., Jeevan,T., Walker,D.; Webby,R.
EPI2689602	HA	United States	2022-Jan-30	EPI_ISL_18107055	A/american wigeon/Tennessee/CEIRR-301/2022			Poulson,R., Stallknecht,D., Rubrum,A., Jeevan,T., Walker,D.; Webby,R.
EPI2689590	HA	United States	2022-Jan-31	EPI_ISL_18107050	A/mallard duck/Tennessee/CEIRR-309/2022			Poulson,R., Stallknecht,D., Rubrum,A., Jeevan,T., Walker,D.; Webby,R.
EPI2689582	HA	United States	2022-Jan-31	EPI_ISL_18107049	A/mallard duck/Tennessee/CEIRR-307/2022			Poulson,R., Stallknecht,D., Rubrum,A., Jeevan,T., Walker,D.; Webby,R.
EPI2689574	HA	United States	2022-Jan-30	EPI_ISL_18107048	A/mallard duck/Tennessee/CEIRR-303/2022			Poulson,R., Stallknecht,D., Rubrum,A., Jeevan,T., Walker,D.; Webby,R.
EPI2689567	HA	United States	2022-Jan-25	EPI_ISL_18107047	A/mallard duck/Tennessee/CEIRR-293/2022			Poulson,R., Stallknecht,D., Rubrum,A., Jeevan,T., Walker,D.; Webby,R.
EPI2689556	HA	United States	2022-Jan-25	EPI_ISL_18107046	A/mallard duck/Tennessee/CEIRR-291/2022			Poulson,R., Stallknecht,D., Rubrum,A., Jeevan,T., Walker,D.; Webby,R.
EPI2689554	HA	United States	2022-Sep-19	EPI_ISL_18107045	A/redhead duck/Minnesota/CEIRR-4017/2022			Poulson,R., Stallknecht,D., Rubrum,A., Jeevan,T., Walker,D.; Webby,R.
EPI2689542	HA	United States	2022-Jan-25	EPI_ISL_18107041	A/mallard duck/Tennessee/CEIRR-290/2022			Poulson,R., Stallknecht,D., Rubrum,A., Jeevan,T., Walker,D.; Webby,R.
EPI2689530	HA	United States	2022-Jan-25	EPI_ISL_18107035	A/mallard duck/Tennessee/CEIRR-288/2022			Poulson,R., Stallknecht,D., Rubrum,A., Jeevan,T., Walker,D.; Webby,R.
EPI2689517	HA	United States	2022-Jan-25	EPI_ISL_18107030	A/mallard duck/Tennessee/CEIRR-287/2022			Poulson,R., Stallknecht,D., Rubrum,A., Jeevan,T., Walker,D.; Webby,R.
EPI2689505	HA	United States	2022-Jan-24	EPI_ISL_18107026	A/mallard duck/Tennessee/CEIRR-282/2022			Poulson,R., Stallknecht,D., Rubrum,A., Jeevan,T., Walker,D.; Webby,R.
EPI2689497	HA	United States	2022-Jan-24	EPI_ISL_18107025	A/mallard duck/Tennessee/CEIRR-278/2022			Poulson,R., Stallknecht,D., Rubrum,A., Jeevan,T., Walker,D.; Webby,R.
EPI2689489	HA	United States	2022-Sep-17	EPI_ISL_18107024	A/green winged teal/Minnesota/CEIRR-4011/2022			Poulson,R., Stallknecht,D., Rubrum,A., Jeevan,T., Walker,D.; Webby,R.
EPI2689481	HA	United States	2022-Sep-17	EPI_ISL_18107023	A/green winged teal/Minnesota/CEIRR-3856/2022			Poulson,R., Stallknecht,D., Rubrum,A., Jeevan,T., Walker,D.; Webby,R.
EPI2689473	HA	United States	2022-Jan-25	EPI_ISL_18107022	A/gadwall duck/Tennessee/CEIRR-297/2022			Poulson,R., Stallknecht,D., Rubrum,A., Jeevan,T., Walker,D.; Webby,R.
EPI2689465	HA	United States	2022-Jan-25	EPI_ISL_18107021	A/gadwall duck/Tennessee/CEIRR-296/2022			Poulson,R., Stallknecht,D., Rubrum,A., Jeevan,T., Walker,D.; Webby,R.
EPI2689458	HA	United States	2022-Jan-25	EPI_ISL_18107020	A/gadwall duck/Tennessee/CEIRR-295/2022			Poulson,R., Stallknecht,D., Rubrum,A., Jeevan,T., Walker,D.; Webby,R.
EPI2689451	HA	United States	2022-Sep-22	EPI_ISL_18107019	A/blue winged teal/Louisiana/CEIRR-4075/2022			Poulson,R., Stallknecht,D., Rubrum,A., Jeevan,T., Walker,D.; Webby,R.
EPI2689443	HA	United States	2022-Sep-22	EPI_ISL_18107018	A/blue winged teal/Louisiana/CEIRR-4050/2022			Poulson,R., Stallknecht,D., Rubrum,A., Jeevan,T., Walker,D.; Webby,R.
EPI2689438	HA	United States	2022-Sep-14	EPI_ISL_18107017	A/blue winged teal/Louisiana/CEIRR-3834/2022			Poulson,R., Stallknecht,D., Rubrum,A., Jeevan,T., Walker,D.; Webby,R.
EPI2689412	HA	United States	2022-Jan-25	EPI_ISL_18107005	A/american wigeon/Tennessee/CEIRR-298/2022			Poulson,R., Stallknecht,D., Rubrum,A., Jeevan,T., Walker,D.; Webby,R.
EPI2652343	HA	Poland	2023-Jan-20	EPI_ISL_18040893	A/domestic_duck/Poland/H89-T1/2023	National Veterinary Research Institut Poland, PIWet-PIB	National Veterinary Research Institut Poland, PIWet-PIB	Swieton,Edyta;Tarasiuk,Karolina;Wyrostek,Krzysztof;Kozak,Edyta;Stys-Fijol,Natalia;Smietanka,Krzysztof
EPI2530128	HA	United States	2022-Nov-14	EPI_ISL_17549523	A/duck/California/T2202390/2022	University of California Davis, California Animal Health & Food Safety Lab	University of California Davis, California Animal Health & Food Safety Lab	Ramsubeik,S., Stoute,S., Crossley,B., Jerry,C., Jackson,W., Rejmanek,D. and Ochoa,J.
EPI2247292	HA	Canada	2022-May-05	EPI_ISL_16190394	A/Black-Billed Magpie/AB/FAV-0505-53/2022	Alberta Agriculture and Forestry, Government of Alberta	Canadian Food Inspection Agency	Alkie, Tamiru; Hicks, Mark; Pybuse, Margo J; Xu, Wanhong; Hisanaga, Tamiko; Suderman, Suderman; Koziuk, Janice; Kruczkiewicz, Peter; Nguyen, Hoang Hai; Fisher, Mathew; Lung, Oliver; Berhane, Yohannes
EPI1998386	HA	Spain	2022-Jan-01	EPI_ISL_11259314	A/duck/Spain/570-2_22VIR2142-40/2022	Laboratorio Central de Veterinaria	Istituto Zooprofilattico Sperimentale delle Venezie	Ruano, M.J.; Rocha, A.; Sanchez, A.; Aguero, M; Barbierato, G.; Zecchin, B.; Fusaro, A.; Schivo, A.; Salviato, A.; Palumbo, E.; Giussani, E.; Monne, I.; Terregino, C.
EPI1998058	HA	Ireland	2021-Dec-11	EPI_ISL_11259273	A/duck/Ireland/036105_22VIR1325-22/2021	Central Veterinary Research Laboratory	Istituto Zooprofilattico Sperimentale delle Venezie	Byrne, C.; Garcia, K.; Cuartero, L.G.; Barbierato, G.; Zecchin, B.; Fusaro, A.; Schivo, A.; Salviato, A.; Palumbo, E.; Giussani, E.; Monne, I.; Terregino, C.
EPI1998017	HA	Ireland	2021-Dec-17	EPI_ISL_11259268	A/duck/Ireland/036646_22VIR1325-18/2021	Central Veterinary Research Laboratory	Istituto Zooprofilattico Sperimentale delle Venezie	Byrne, C.; Garcia, K.; Cuartero, L.G.; Barbierato, G.; Zecchin, B.; Fusaro, A.; Schivo, A.; Salviato, A.; Palumbo, E.; Giussani, E.; Monne, I.; Terregino, C.
EPI2075601	HA	United Kingdom	2022-May-18	EPI_ISL_13453559	A/domestic_duck/England/073865/2022	Animal and Plant Health Agency (APHA)	Animal and Plant Health Agency (APHA)
EPI2001628	HA	United Kingdom	2022-Jan-23	EPI_ISL_11406402	A/domestic_duck/England/007588/2022	Animal and Plant Health Agency (APHA)	Animal and Plant Health Agency (APHA)
EPI1963873	HA	United Kingdom	2021-Nov-18	EPI_ISL_9029959	A/domestic_duck/England/058612/2021	Animal and Plant Health Agency (APHA)	Animal and Plant Health Agency (APHA)
EPI2076397	HA	United Kingdom	2022-Feb-25	EPI_ISL_13486962	A/Sparrowhawk/Scotland/022623/2022	Animal and Plant Health Agency (APHA)	Animal and Plant Health Agency (APHA)
EPI2332833	HA	Belgium	2022-Jan-03	EPI_ISL_16747602	A/Buteo_buteo/Belgium/00331-0007/2022	Sciensano - Animal Infectious Diseases	Sciensano, Department of Animal Infectious Diseases	Van Borm, Steven; Roupie, Virginie; Hostyn, Pierre; Lambrecht, Benedicte; Steensels, Mieke
EPI2122817	HA	Belgium	2021-Dec-24	EPI_ISL_14388434	A/Buteo_buteo/belgium/334_0013/2021	Sciensano - Animal Infectious Diseases	Sciensano, Department of Animal Infectious Diseases	Van Borm, Steven; Vandenbussche, Frank; Roupie, Virginie; Lambrecht, Benedicte; Steensels, Mieke
EPI2076341	HA	United Kingdom	2021-Dec-15	EPI_ISL_13486819	A/Common_buzzard/Scotland/073099/2021	Animal and Plant Health Agency (APHA)	Animal and Plant Health Agency (APHA)
EPI2076333	HA	United Kingdom	2022-Mar-01	EPI_ISL_13486807	A/Common_buzzard/Scotland/020817/2022	Animal and Plant Health Agency (APHA)	Animal and Plant Health Agency (APHA)
EPI2075650	HA	United Kingdom	2022-Mar-17	EPI_ISL_13453565	A/buzzard/Scotland/043118/2022	Animal and Plant Health Agency (APHA)	Animal and Plant Health Agency (APHA)
EPI2011656	HA	Denmark	2021-Oct-25	EPI_ISL_11798571	A/common_buzzard/Denmark/24271-1.02/2021-10-25	Statens Serumm Institute	Statens Serum Institute	Charlotte Hjulsager, Yuan Liang
EPI2310138	HA	United States	2022-Apr-11	EPI_ISL_16632502	A/red-tailed hawk/Massachusetts/22-016611-004/2022	Cummings School of Veterinary Medicine at Tufts University	Cummings School of Veterinary Medicine at Tufts University	Chinh,Thanh; Franzen,Kerrie; Love,Emily; Killian,Mary; Lantz,Kristina; Hicks,Jessica; Norris, Cameron; Stuber,Tod; Sawatzki, Kaitlin; Puryear, Wendy; Foss, Alexa; Ellis,Stephanie; Taylor,Jennifer; Myrbeck,Leah; Runstadler, Jonathan
EPI2310130	HA	United States	2022-Apr-01	EPI_ISL_16632501	A/red-tailed hawk/Massachusetts/22-016611-001/2022	Cummings School of Veterinary Medicine at Tufts University	Cummings School of Veterinary Medicine at Tufts University	Chinh,Thanh; Franzen,Kerrie; Love,Emily; Killian,Mary; Lantz,Kristina; Hicks,Jessica; Norris, Cameron; Stuber,Tod; Sawatzki, Kaitlin; Puryear, Wendy; Foss, Alexa; Patel,Priya; Runstadler, Jonathan
EPI2310122	HA	United States	2022-Apr-04	EPI_ISL_16632500	A/red-tailed hawk/Massachusetts/22-010671-010/2022	Cummings School of Veterinary Medicine at Tufts University	Cummings School of Veterinary Medicine at Tufts University	Chinh,Thanh; Franzen,Kerrie; Love,Emily; Killian,Mary; Lantz,Kristina; Hicks,Jessica; Norris, Cameron; Stuber,Tod; Sawatzki, Kaitlin; Puryear, Wendy; Foss, Alexa; Ellis,Stephanie; Taylor,Jennifer; Myrbeck,Leah; Runstadler, Jonathan
EPI2310098	HA	United States	2022-Mar-17	EPI_ISL_16632496	A/red-tailed hawk/Massachusetts/22-010671-005/2022	Cummings School of Veterinary Medicine at Tufts University	Cummings School of Veterinary Medicine at Tufts University	Chinh,Thanh; Franzen,Kerrie; Love,Emily; Killian,Mary; Lantz,Kristina; Hicks,Jessica; Norris, Cameron; Stuber,Tod; Sawatzki, Kaitlin; Puryear, Wendy; Foss, Alexa; Patel,Priya; Runstadler, Jonathan
EPI2310306	HA	United States	2022-Jul-21	EPI_ISL_16632523	A/canada goose/Massachusetts/22-025071-002/2022	Cummings School of Veterinary Medicine at Tufts University	Cummings School of Veterinary Medicine at Tufts University	Chinh,Thanh; Franzen,Kerrie; Love,Emily; Killian,Mary; Lantz,Kristina; Hicks,Jessica; Norris, Cameron; Stuber,Tod; Sawatzki, Kaitlin; Puryear, Wendy; Foss, Alexa; Brady,Peg; Runstadler, Jonathan
EPI2247252	HA	Canada	2022-Apr-27	EPI_ISL_16189979	A/Canada Goose/AB/FAV-0505-36/2022	Alberta Agriculture and Forestry, Government of Alberta	Canadian Food Inspection Agency	Alkie, Tamiru; Hicks, Mark; Pybuse, Margo J; Xu, Wanhong; Hisanaga, Tamiko; Suderman, Suderman; Koziuk, Janice; Kruczkiewicz, Peter; Nguyen, Hoang Hai; Fisher, Mathew; Lung, Oliver; Berhane, Yohannes
EPI2247244	HA	Canada	2022-Apr-29	EPI_ISL_16189978	A/Canada Goose/AB/FAV-0505-31/2022	Alberta Agriculture and Forestry, Government of Alberta	Canadian Food Inspection Agency	Alkie, Tamiru; Hicks, Mark; Pybuse, Margo J; Xu, Wanhong; Hisanaga, Tamiko; Suderman, Suderman; Koziuk, Janice; Kruczkiewicz, Peter; Nguyen, Hoang Hai; Fisher, Mathew; Lung, Oliver; Berhane, Yohannes
EPI2246965	HA	Canada	2022-Mar-31	EPI_ISL_16173537	A/Canada Goose/ON/FAV-0187-01/2022	Ontario Veterinary College, University of Guelph	Canadian Food Inspection Agency	Alkie, Tamiru; Cox, Sherri; Ojkic, Davor; Stevens, Brian; Xu, Wanhong; Hisanaga, Tamiko; Suderman, Suderman; Koziuk, Janice; Kruczkiewicz, Peter; Nguyen, Hoang Hai; Fisher, Mathew; Lung, Oliver; Berhane, Yohannes
EPI1963889	HA	United Kingdom	2021-Nov-01	EPI_ISL_9029961	A/Canada_goose/England/385250/2021	Animal and Plant Health Agency (APHA)	Animal and Plant Health Agency (APHA)
EPI3110227	HA	Brazil	2023-Jul-25	EPI_ISL_18975372	A/Sula_leucogaster/Brazil-PR/A0001-IBTEC/2023	Laboratorio de Ecologia e Conservação	São Paulo State University - Biotechnology Institute	Celis, Eliana Leonor Hurtado; Possebon, Fabio Sossai; Garcia, Yasmin Luísa Neves Lemes; Calmon, Marilia Freitas; da Costa, Vivaldo Gomes; de Lima, Fabio Henrique; Domit, Camila; Spilki, Fernando Rosado; Rahal, Paula; Junior, João Pessoa Araújo
EPI2841611	HA	Belgium	2023-Jun-30	EPI_ISL_18647447	A/Thalasseus_sandvicensis/Belgium/06376_0012/2023	Sciensano - Animal Infectious Diseases	Sciensano, Department of Animal Infectious Diseases	Van Borm, Steven; Roupie, Virginie; Hostyn, Pierre; Mathijs, Elisabeth; Lambrecht, Benedicte; Steensels, Mieke
EPI2841603	HA	Belgium	2023-Jul-03	EPI_ISL_18647426	A/Ichtyaetus_melanocephalus/Belgium/06376_0001/2023	Sciensano - Animal Infectious Diseases	Sciensano, Department of Animal Infectious Diseases	Van Borm, Steven; Roupie, Virginie; Hostyn, Pierre; Mathijs, Elisabeth; Lambrecht, Benedicte; Steensels, Mieke
EPI2670206	HA	Russian Federation	2022-Apr-15	EPI_ISL_18074199	A/crow/Khabarovsk/776-56/2022	Federal Centre for Animal Health (ARRIAH) OIE Regional Reference Laboratory	Federal Centre for Animal Health (ARRIAH)	N., Zinyakov; A., Kozlov; P., Zhestkov; A., Grekhneva; A., Andriyasov; E., Ovchinnikova; Z., Nikonova; D., Andreychuk; I., Chvala
EPI2310186	HA	United States	2022-May-12	EPI_ISL_16632508	A/osprey/Massachusetts/22-016611-016/2022	Cummings School of Veterinary Medicine at Tufts University	Cummings School of Veterinary Medicine at Tufts University	Chinh,Thanh; Franzen,Kerrie; Love,Emily; Killian,Mary; Lantz,Kristina; Hicks,Jessica; Norris, Cameron; Stuber,Tod; Sawatzki, Kaitlin; Puryear, Wendy; Foss, Alexa; Falck,Karalyn; Runstadler, Jonathan
EPI2310178	HA	United States	2022-May-02	EPI_ISL_16632507	A/great horned owl/Massachusetts/22-016611-013/2022	Cummings School of Veterinary Medicine at Tufts University	Cummings School of Veterinary Medicine at Tufts University	Chinh,Thanh; Franzen,Kerrie; Love,Emily; Killian,Mary; Lantz,Kristina; Hicks,Jessica; Norris, Cameron; Stuber,Tod; Sawatzki, Kaitlin; Puryear, Wendy; Foss, Alexa; Murray,Maureen; Cox,Elena; Runstadler, Jonathan
EPI2310170	HA	United States	2022-May-02	EPI_ISL_16632506	A/great horned owl/Massachusetts/22-016611-011/2022	Cummings School of Veterinary Medicine at Tufts University	Cummings School of Veterinary Medicine at Tufts University	Chinh,Thanh; Franzen,Kerrie; Love,Emily; Killian,Mary; Lantz,Kristina; Hicks,Jessica; Norris, Cameron; Stuber,Tod; Sawatzki, Kaitlin; Puryear, Wendy; Foss, Alexa; Murray,Maureen; Cox,Elena; Runstadler, Jonathan
EPI2310106	HA	United States	2022-Mar-22	EPI_ISL_16632498	A/snowy owl/Massachusetts/22-010671-008/2022	Cummings School of Veterinary Medicine at Tufts University	Cummings School of Veterinary Medicine at Tufts University	Chinh,Thanh; Franzen,Kerrie; Love,Emily; Killian,Mary; Lantz,Kristina; Hicks,Jessica; Norris, Cameron; Stuber,Tod; Sawatzki, Kaitlin; Puryear, Wendy; Foss, Alexa; Murray,Maureen; Cox,Elena; Runstadler, Jonathan
EPI2310064	HA	United States	2022-Mar-13	EPI_ISL_16632487	A/snowy owl/Massachusetts/22-008951-004/2022	Cummings School of Veterinary Medicine at Tufts University	Cummings School of Veterinary Medicine at Tufts University	Chinh,Thanh; Franzen,Kerrie; Love,Emily; Killian,Mary; Lantz,Kristina; Hicks,Jessica; Norris, Cameron; Stuber,Tod; Sawatzki, Kaitlin; Puryear, Wendy; Foss, Alexa; Patel,Priya; Runstadler, Jonathan
EPI2247308	HA	Canada	2022-May-06	EPI_ISL_16190578	A/Great Horned Owl/AB/FAV-0505-58/2022	Alberta Agriculture and Forestry, Government of Alberta	Canadian Food Inspection Agency	Alkie, Tamiru; Hicks, Mark; Pybuse, Margo J; Xu, Wanhong; Hisanaga, Tamiko; Suderman, Suderman; Koziuk, Janice; Kruczkiewicz, Peter; Nguyen, Hoang Hai; Fisher, Mathew; Lung, Oliver; Berhane, Yohannes
EPI2247300	HA	Canada	2022-May-06	EPI_ISL_16190395	A/Great Horned Owl/AB/FAV-0505-57/2022	Alberta Agriculture and Forestry, Government of Alberta	Canadian Food Inspection Agency	Alkie, Tamiru; Hicks, Mark; Pybuse, Margo J; Xu, Wanhong; Hisanaga, Tamiko; Suderman, Suderman; Koziuk, Janice; Kruczkiewicz, Peter; Nguyen, Hoang Hai; Fisher, Mathew; Lung, Oliver; Berhane, Yohannes
EPI2247284	HA	Canada	2022-May-02	EPI_ISL_16189983	A/Great Horned Owl/AB/FAV-0505-52/2022	Alberta Agriculture and Forestry, Government of Alberta	Canadian Food Inspection Agency
EPI2247260	HA	Canada	2022-Apr-28	EPI_ISL_16189980	A/Great Horned Owl/AB/FAV-0505-44/2022	Alberta Agriculture and Forestry, Government of Alberta	Canadian Food Inspection Agency	Alkie, Tamiru; Hicks, Mark; Pybuse, Margo J; Xu, Wanhong; Hisanaga, Tamiko; Suderman, Suderman; Koziuk, Janice; Kruczkiewicz, Peter; Nguyen, Hoang Hai; Fisher, Mathew; Lung, Oliver; Berhane, Yohannes
EPI2247228	HA	Canada	2022-Apr-28	EPI_ISL_16189912	A/Great Horned Owl/AB/FAV-0505-19/2022	Alberta Agriculture and Forestry, Government of Alberta	Canadian Food Inspection Agency	Alkie, Tamiru; Hicks, Mark; Pybuse, Margo J; Xu, Wanhong; Hisanaga, Tamiko; Suderman, Suderman; Koziuk, Janice; Kruczkiewicz, Peter; Nguyen, Hoang Hai; Fisher, Mathew; Lung, Oliver; Berhane, Yohannes
EPI2246947	HA	Canada	2022-Mar-26	EPI_ISL_16173531	A/Turkey Vulture/ON/FAV-0178-01/2022	Ontario Veterinary College, University of Guelph	Canadian Food Inspection Agency	Alkie, Tamiru; Cox, Sherri; Ojkic, Davor; Stevens, Brian; Xu, Wanhong; Hisanaga, Tamiko; Suderman, Suderman; Koziuk, Janice; Kruczkiewicz, Peter; Nguyen, Hoang Hai; Fisher, Mathew; Lung, Oliver; Berhane, Yohannes
EPI2208903	HA	Belgium	2022-Sep-23	EPI_ISL_15698370	A/Ardea_cinerea/Belgium/11304_0003/2022	Sciensano - Animal Infectious Diseases	Sciensano, Department of Animal Infectious Diseases
EPI2197208	HA	Finland	2021-Oct-01	EPI_ISL_15518267	A/ural_owl/Finland/14041_21RS3535-7/2021	Finnish Food Authority	Istituto Zooprofilattico Sperimentale Delle Venezie	Tammiranta, N.;Kantala, T.;Laamanen, I.;Gadd, T.;Zecchin, B.;Fusaro, A.;Schivo, A.;Salviato, A.;Palumbo, E.;Milani, A.;Giussani, E.;Pastori, A.;Monne, I.;Terregino, C.
EPI2197200	HA	Finland	2021-Oct-01	EPI_ISL_15518266	A/pheasant/Finland/13088_21RS3535-6/2021	Finnish Food Authority	Istituto Zooprofilattico Sperimentale Delle Venezie	Tammiranta, N.;Kantala, T.;Laamanen, I.;Gadd, T.;Zecchin, B.;Fusaro, A.;Schivo, A.;Salviato, A.;Palumbo, E.;Milani, A.;Giussani, E.;Pastori, A.;Monne, I.;Terregino, C.
EPI2197192	HA	Finland	2021-Sep-01	EPI_ISL_15518265	A/pheasant/Finland/12428_21RS3535-5/2021	Finnish Food Authority	Istituto Zooprofilattico Sperimentale Delle Venezie	Tammiranta, N.;Kantala, T.;Laamanen, I.;Gadd, T.;Zecchin, B.;Fusaro, A.;Schivo, A.;Salviato, A.;Palumbo, E.;Milani, A.;Giussani, E.;Pastori, A.;Monne, I.;Terregino, C.
EPI2197184	HA	Finland	2021-Sep-01	EPI_ISL_15518264	A/pheasant/Finland/12309_21RS3535-4/2021	Finnish Food Authority	Istituto Zooprofilattico Sperimentale Delle Venezie	Tammiranta, N.;Kantala, T.;Laamanen, I.;Gadd, T.;Zecchin, B.;Fusaro, A.;Schivo, A.;Salviato, A.;Palumbo, E.;Milani, A.;Giussani, E.;Pastori, A.;Monne, I.;Terregino, C.
EPI2197176	HA	Finland	2021-Sep-01	EPI_ISL_15518263	A/pheasant/Finland/12237_21RS3535-3/2021	Finnish Food Authority	Istituto Zooprofilattico Sperimentale Delle Venezie	Tammiranta, N.;Kantala, T.;Laamanen, I.;Gadd, T.;Zecchin, B.;Fusaro, A.;Schivo, A.;Salviato, A.;Palumbo, E.;Milani, A.;Giussani, E.;Pastori, A.;Monne, I.;Terregino, C.
EPI2197168	HA	Finland	2021-Nov-01	EPI_ISL_15518262	A/northern_goshawk/Finland/14188_21RS3535-9/2021	Finnish Food Authority	Istituto Zooprofilattico Sperimentale Delle Venezie	Tammiranta, N.;Kantala, T.;Laamanen, I.;Gadd, T.;Zecchin, B.;Fusaro, A.;Schivo, A.;Salviato, A.;Palumbo, E.;Milani, A.;Giussani, E.;Pastori, A.;Monne, I.;Terregino, C.
EPI2122809	HA	Belgium	2021-Dec-23	EPI_ISL_14388346	A/Tyto_alba/Belgium/334_0012/2021	Sciensano - Animal Infectious Diseases	Sciensano, Department of Animal Infectious Diseases	Van Borm, Steven; Vandenbussche, Frank; Roupie, Virginie; Lambrecht, Benedicte; Steensels, Mieke
EPI2114287	HA	Netherlands	2022-Jun-12	EPI_ISL_14175215	A/Northern Gannet/Netherlands/22010736-001/2022	Wageningen Bioveterinary Research	Wageningen Bioveterinary Research	Beerens, Nancy; Harders, Frank; Pritz-Verschuren, Sylvia; Roose, Marit; Venema, Sandra; Germeraad, Evelien; Engelsma, Marc; Heutink, Rene
EPI2310412	HA	United States	2022-Jun-28	EPI_ISL_16632538	A/herring gull/Maine/22-022526-002/2022	Cummings School of Veterinary Medicine at Tufts University	Cummings School of Veterinary Medicine at Tufts University	Chinh,Thanh; Franzen,Kerrie; Love,Emily; Killian,Mary; Lantz,Kristina; Hicks,Jessica; Norris, Cameron; Stuber,Tod; Sawatzki, Kaitlin; Puryear, Wendy; Foss, Alexa; Runstadler, Jonathan
EPI2310298	HA	United States	2022-Jul-14	EPI_ISL_16632522	A/herring gull/Massachusetts/22-025071-001/2022	Cummings School of Veterinary Medicine at Tufts University	Cummings School of Veterinary Medicine at Tufts University	Chinh,Thanh; Franzen,Kerrie; Love,Emily; Killian,Mary; Lantz,Kristina; Hicks,Jessica; Norris, Cameron; Stuber,Tod; Sawatzki, Kaitlin; Puryear, Wendy; Foss, Alexa; Ellis,Stephanie; Taylor,Jennifer; Myrbeck,Leah; Runstadler, Jonathan
EPI2310250	HA	United States	2022-Jul-08	EPI_ISL_16632516	A/herring gull/Maine/22-022526-016/2022	Cummings School of Veterinary Medicine at Tufts University	Cummings School of Veterinary Medicine at Tufts University	Chinh,Thanh; Franzen,Kerrie; Love,Emily; Killian,Mary; Lantz,Kristina; Hicks,Jessica; Norris, Cameron; Stuber,Tod; Sawatzki, Kaitlin; Puryear, Wendy; Foss, Alexa; Runstadler, Jonathan
EPI2310194	HA	United States	2022-Jun-29	EPI_ISL_16632509	A/herring gull/Maine/22-022526-004/2022	Cummings School of Veterinary Medicine at Tufts University	Cummings School of Veterinary Medicine at Tufts University	Chinh,Thanh; Franzen,Kerrie; Love,Emily; Killian,Mary; Lantz,Kristina; Hicks,Jessica; Norris, Cameron; Stuber,Tod; Sawatzki, Kaitlin; Puryear, Wendy; Foss, Alexa; Runstadler, Jonathan
EPI2310090	HA	United States	2022-Mar-18	EPI_ISL_16632495	A/herring gull/Massachusetts/22-010671-001/2022	Cummings School of Veterinary Medicine at Tufts University	Cummings School of Veterinary Medicine at Tufts University	Chinh,Thanh; Franzen,Kerrie; Love,Emily; Killian,Mary; Lantz,Kristina; Hicks,Jessica; Norris, Cameron; Stuber,Tod; Sawatzki, Kaitlin; Puryear, Wendy; Foss, Alexa; Patel,Priya; Runstadler, Jonathan
EPI2310072	HA	United States	2022-Mar-14	EPI_ISL_16632488	A/herring gull/Massachusetts/22-008951-005/2022	Cummings School of Veterinary Medicine at Tufts University	Cummings School of Veterinary Medicine at Tufts University	Chinh,Thanh; Franzen,Kerrie; Love,Emily; Killian,Mary; Lantz,Kristina; Hicks,Jessica; Norris, Cameron; Stuber,Tod; Sawatzki, Kaitlin; Puryear, Wendy; Foss, Alexa; Patel,Priya; Runstadler, Jonathan
EPI2015053	HA	Denmark	2021-Oct-24	EPI_ISL_11798574	A/Eurasian_wigeon/Denmark/24279-1/2021-10-24	Statens Serumm Institute	Statens Serum Institute	Charlotte Hjulsager, Yuan Liang
EPI2015085	HA	Denmark	2021-Nov-01	EPI_ISL_11798579	A/greylag_goose/Denmark/24343-1.02/2021-11-01	Statens Serumm Institute	Statens Serum Institute	Charlotte Hjulsager, Yuan Liang
EPI2015077	HA	Denmark	2021-Oct-27	EPI_ISL_11798578	A/greylag_goose/Denmark/24309-1.01/2021-10-27	Statens Serumm Institute	Statens Serum Institute	Charlotte Hjulsager, Yuan Liang
EPI3052757	HA	Japan	2023-Dec-23	EPI_ISL_18909437	A/hooded crane/Kagoshima/KU-22/2023	Kagoshima University	Kagoshima University
EPI2310282	HA	United States	2022-Jul-12	EPI_ISL_16632520	A/double-crested cormorant/Massachusetts/22-022527-009/2022	Cummings School of Veterinary Medicine at Tufts University	Cummings School of Veterinary Medicine at Tufts University	Chinh,Thanh; Franzen,Kerrie; Love,Emily; Killian,Mary; Lantz,Kristina; Hicks,Jessica; Norris, Cameron; Stuber,Tod; Sawatzki, Kaitlin; Puryear, Wendy; Foss, Alexa; Ellis,Stephanie; Taylor,Jennifer; Myrbeck,Leah; Runstadler, Jonathan
EPI2246956	HA	Canada	2022-Mar-24	EPI_ISL_16173532	A/Bald Eagle/ON/FAV-0178-02/2022	Ontario Veterinary College, University of Guelph	Canadian Food Inspection Agency	Alkie, Tamiru; Cox, Sherri; Ojkic, Davor; Stevens, Brian; Xu, Wanhong; Hisanaga, Tamiko; Suderman, Suderman; Koziuk, Janice; Kruczkiewicz, Peter; Nguyen, Hoang Hai; Fisher, Mathew; Lung, Oliver; Berhane, Yohannes
EPI2246929	HA	Canada	2022-Mar-22	EPI_ISL_16173529	A/Bald eagle/ON/FAV-0221-02/2022	Ontario Veterinary College, University of Guelph	Canadian Food Inspection Agency	Alkie, Tamiru; Cox, Sherri; Ojkic, Davor; Stevens, Brian; Xu, Wanhong; Hisanaga, Tamiko; Suderman, Suderman; Koziuk, Janice; Kruczkiewicz, Peter; Nguyen, Hoang Hai; Fisher, Mathew; Lung, Oliver; Berhane, Yohannes
EPI2246921	HA	Canada	2022-Apr-04	EPI_ISL_16173528	A/Bald Eagle/ON/FAV-0221-01/2022	Ontario Veterinary College, University of Guelph	Canadian Food Inspection Agency	Alkie, Tamiru; Cox, Sherri; Ojkic, Davor; Stevens, Brian; Xu, Wanhong; Hisanaga, Tamiko; Suderman, Suderman; Koziuk, Janice; Kruczkiewicz, Peter; Nguyen, Hoang Hai; Fisher, Mathew; Lung, Oliver; Berhane, Yohannes
EPI2246913	HA	Canada	2022-Mar-14	EPI_ISL_16173527	A/Bald Eagle/PEI/FAV-0172/2022	Atlantic Veterinary College, University of Prince Edward Island	Canadian Food Inspection Agency	Alkie, Tamiru; Yason, Carmencita; Jones, Megan E. B.; Bourque, Laura; Xu, Wanhong; Hisanaga, Tamiko; Suderman, Suderman; Koziuk, Janice; Kruczkiewicz, Peter; Nguyen, Hoang Hai; Fisher, Mathew; Lung, Oliver; Berhane, Yohannes
EPI2246905	HA	Canada	2022-Mar-03	EPI_ISL_16173526	A/Bald Eagle/PEI/FAV-0129-01/2022	Atlantic Veterinary College, University of Prince Edward Island	Canadian Food Inspection Agency	Alkie, Tamiru; Yason, Carmencita; Jones, Megan E. B.; Bourque, Laura; Xu, Wanhong; Hisanaga, Tamiko; Suderman, Suderman; Koziuk, Janice; Kruczkiewicz, Peter; Nguyen, Hoang Hai; Fisher, Mathew; Lung, Oliver; Berhane, Yohannes
EPI2310082	HA	United States	2022-Mar-09	EPI_ISL_16632494	A/sanderling/Massachusetts/22-008951-009/2022	Cummings School of Veterinary Medicine at Tufts University	Cummings School of Veterinary Medicine at Tufts University	Chinh,Thanh; Franzen,Kerrie; Love,Emily; Killian,Mary; Lantz,Kristina; Hicks,Jessica; Norris, Cameron; Stuber,Tod; Sawatzki, Kaitlin; Puryear, Wendy; Foss, Alexa; Patel,Priya; Runstadler, Jonathan
EPI2841713	HA	Belgium	2023-Jun-27	EPI_ISL_18647517	A/Chroicocephalus_ridibundus/Belgium/06251_0005/2023	Sciensano - Animal Infectious Diseases	Sciensano, Department of Animal Infectious Diseases	Van Borm, Steven; Roupie, Virginie; Hostyn, Pierre; Mathijs, Elisabeth; Lambrecht, Benedicte; Steensels, Mieke
EPI2841690	HA	Belgium	2023-Jul-07	EPI_ISL_18647480	A/Chroicocephalus_ridibundus/Belgium/06554_0007/2023	Sciensano - Animal Infectious Diseases	Sciensano, Department of Animal Infectious Diseases	Van Borm, Steven; Roupie, Virginie; Hostyn, Pierre; Mathijs, Elisabeth; Lambrecht, Benedicte; Steensels, Mieke
EPI2841682	HA	Belgium	2023-Jun-30	EPI_ISL_18647456	A/Chroicocephalus_ridibundus/Belgium/06376_0013/2023	Sciensano - Animal Infectious Diseases	Sciensano, Department of Animal Infectious Diseases	Van Borm, Steven; Roupie, Virginie; Hostyn, Pierre; Mathijs, Elisabeth; Lambrecht, Benedicte; Steensels, Mieke
EPI2540208	HA	Belgium	2023-Jan-12	EPI_ISL_17599532	A/Chroicocephalus_ridibundus/Belgium/00374_0005/2023	Sciensano - Animal Infectious Diseases	Sciensano, Department of Animal Infectious Diseases	Van Borm, Steven; Roupie, Virginie; Hostyn, Pierre; Mathijs, Elisabeth; Lambrecht, Benedicte; Steensels, Mieke
EPI2114295	HA	Netherlands	2022-Jun-13	EPI_ISL_14175216	A/Black-headed Gull/Netherlands/22010745-002/2022	Wageningen Bioveterinary Research	Wageningen Bioveterinary Research	Beerens, Nancy; Harders, Frank; Pritz-Verschuren, Sylvia; Roose, Marit; Venema, Sandra; Germeraad, Evelien; Engelsma, Marc; Heutink, Rene
EPI2001636	HA	United Kingdom	2022-Jan-31	EPI_ISL_11406403	A/black-headed_gull/England/306270/2022	Animal and Plant Health Agency (APHA)	Animal and Plant Health Agency (APHA)
EPI2076325	HA	United Kingdom	2021-Dec-17	EPI_ISL_13486796	A/Barnacle_goose/Scotland/109105/2021	Animal and Plant Health Agency (APHA)	Animal and Plant Health Agency (APHA)
EPI2076317	HA	United Kingdom	2021-Dec-17	EPI_ISL_13486785	A/Barnacle_goose/Scotland/109090/2021	Animal and Plant Health Agency (APHA)	Animal and Plant Health Agency (APHA)
EPI2076309	HA	United Kingdom	2021-Dec-30	EPI_ISL_13486772	A/Barnacle_goose/Scotland/076711/2021	Animal and Plant Health Agency (APHA)	Animal and Plant Health Agency (APHA)
EPI2076301	HA	United Kingdom	2021-Dec-04	EPI_ISL_13486760	A/Barnacle_goose/Scotland/075827/2021	Animal and Plant Health Agency (APHA)	Animal and Plant Health Agency (APHA)
EPI2076293	HA	United Kingdom	2021-Dec-04	EPI_ISL_13486748	A/Barnacle_goose/Scotland/075760/2021	Animal and Plant Health Agency (APHA)	Animal and Plant Health Agency (APHA)
EPI2076285	HA	United Kingdom	2021-Dec-10	EPI_ISL_13486738	A/Barnacle_goose/Scotland/075563/2021	Animal and Plant Health Agency (APHA)	Animal and Plant Health Agency (APHA)
EPI2076277	HA	United Kingdom	2021-Dec-11	EPI_ISL_13486729	A/Barnacle_goose/Scotland/072168/2021	Animal and Plant Health Agency (APHA)	Animal and Plant Health Agency (APHA)
EPI2076269	HA	United Kingdom	2022-Jan-02	EPI_ISL_13486713	A/Barnacle_goose/Scotland/003588/2022	Animal and Plant Health Agency (APHA)	Animal and Plant Health Agency (APHA)
EPI2076261	HA	United Kingdom	2022-Jan-02	EPI_ISL_13486700	A/Barnacle_goose/Scotland/003579/2022	Animal and Plant Health Agency (APHA)	Animal and Plant Health Agency (APHA)
EPI2076253	HA	United Kingdom	2021-Dec-27	EPI_ISL_13486688	A/Barnacle_goose/Scotland/003169/2021	Animal and Plant Health Agency (APHA)	Animal and Plant Health Agency (APHA)
EPI2075634	HA	United Kingdom	2021-Dec-13	EPI_ISL_13453563	A/Barnacle_goose/Scotland/072152/2021	Animal and Plant Health Agency (APHA)	Animal and Plant Health Agency (APHA)
EPI2075626	HA	United Kingdom	2021-Dec-13	EPI_ISL_13453562	A/Barnacle_goose/Scotland/072140/2021	Animal and Plant Health Agency (APHA)	Animal and Plant Health Agency (APHA)
EPI2075618	HA	United Kingdom	2021-Nov-16	EPI_ISL_13453561	A/Barnacle_goose/Scotland/058494/2021	Animal and Plant Health Agency (APHA)	Animal and Plant Health Agency (APHA)
EPI2011640	HA	Denmark	2021-Oct-30	EPI_ISL_11798569	A/barnacle_goose/Denmark/24342-1.02/2021-10-30	Statens Serumm Institute	Statens Serum Institute	Charlotte Hjulsager, Yuan Liang
EPI2011632	HA	Denmark	2021-Oct-26	EPI_ISL_11798568	A/barnacle_goose/Denmark/24273-1.02/2021-10-26	Statens Serumm Institute	Statens Serum Institute	Charlotte Hjulsager, Yuan Liang
EPI2011624	HA	Denmark	2021-Apr-18	EPI_ISL_11798566	A/barnacle/goose_Denmark/19027-1.02/2021-04-18	Statens Serumm Institute	Statens Serum Institute	Charlotte Hjulsager, Yuan Liang
EPI1988045	HA	Netherlands	2022-Feb-03	EPI_ISL_10454886	A/barnacle goose/Netherlands/22002511-001/2022	Wageningen Bioveterinary Research	Wageningen Bioveterinary Research	Beerens, Nancy; Harders, Frank; Pritz-Verschuren, Sylvia; Roose, Marit; Venema, Sandra; Germeraad, Evelien; Engelsma, Marc; Heutink, Rene
EPI1988029	HA	Netherlands	2022-Jan-29	EPI_ISL_10454854	A/barnacle goose/Netherlands/22002355-002/2022	Wageningen Bioveterinary Research	Wageningen Bioveterinary Research	Beerens, Nancy; Harders, Frank; Pritz-Verschuren, Sylvia; Roose, Marit; Venema, Sandra; Germeraad, Evelien; Engelsma, Marc; Heutink, Rene
EPI2247316	HA	Canada	2022-May-30	EPI_ISL_16190673	A/Chicken/AB/FAV-0832/2022	Alberta Agriculture and Forestry, Government of Alberta	Canadian Food Inspection Agency	Alkie, Tamiru; Hicks, Mark; Pybuse, Margo J; Xu, Wanhong; Hisanaga, Tamiko; Suderman, Suderman; Koziuk, Janice; Kruczkiewicz, Peter; Nguyen, Hoang Hai; Fisher, Mathew; Lung, Oliver; Berhane, Yohannes
EPI2246993	HA	Canada	2022-Apr-07	EPI_ISL_16173549	A/Chicken/ON/FAV-0217-05/2022	Ontario Veterinary College, University of Guelph	Canadian Food Inspection Agency	Alkie, Tamiru; Cox, Sherri; Ojkic, Davor; Stevens, Brian; Xu, Wanhong; Hisanaga, Tamiko; Suderman, Suderman; Koziuk, Janice; Kruczkiewicz, Peter; Nguyen, Hoang Hai; Fisher, Mathew; Lung, Oliver; Berhane, Yohannes
EPI2246984	HA	Canada	2022-Apr-04	EPI_ISL_16173545	A/Chicken/ON/FAV-0208-144/2022	Ontario Veterinary College, University of Guelph	Canadian Food Inspection Agency	Alkie, Tamiru; Cox, Sherri; Ojkic, Davor; Stevens, Brian; Xu, Wanhong; Hisanaga, Tamiko; Suderman, Suderman; Koziuk, Janice; Kruczkiewicz, Peter; Nguyen, Hoang Hai; Fisher, Mathew; Lung, Oliver; Berhane, Yohannes
EPI2246973	HA	Canada	2022-Apr-04	EPI_ISL_16173542	A/Chicken/ON/FAV-0208-133/2022	Ontario Veterinary College, University of Guelph	Canadian Food Inspection Agency	Alkie, Tamiru; Cox, Sherri; Ojkic, Davor; Stevens, Brian; Xu, Wanhong; Hisanaga, Tamiko; Suderman, Suderman; Koziuk, Janice; Kruczkiewicz, Peter; Nguyen, Hoang Hai; Fisher, Mathew; Lung, Oliver; Berhane, Yohannes
EPI2218167	HA	Belgium	2022-Oct-24	EPI_ISL_15813174	A/Gallus_gallus/Belgium/12311_0001/2022	Sciensano - Animal Infectious Diseases	Sciensano, Department of Animal Infectious Diseases	Van Borm, Steven; Roupie, Virginie; Lambrecht, Benedicte; Steensels, Mieke
EPI2208895	HA	Belgium	2022-Sep-26	EPI_ISL_15698209	A/Gallus_gallus/Belgium/11248_0001/2022	Sciensano - Animal Infectious Diseases	Sciensano, Department of Animal Infectious Diseases
EPI2075609	HA	United Kingdom	2022-May-29	EPI_ISL_13453560	A/chicken/Scotland/078873/2022	Animal and Plant Health Agency (APHA)	Animal and Plant Health Agency (APHA)
EPI2001620	HA	United Kingdom	2022-Jan-03	EPI_ISL_11406401	A/chicken/England/000187/2022	Animal and Plant Health Agency (APHA)	Animal and Plant Health Agency (APHA)
EPI2001596	HA	United Kingdom	2022-Jan-06	EPI_ISL_11406398	A/chicken/England/002070/2022	Animal and Plant Health Agency (APHA)	Animal and Plant Health Agency (APHA)
EPI1963857	HA	United Kingdom	2021-Nov-14	EPI_ISL_9029956	A/chicken/England/057314/2021	Animal and Plant Health Agency (APHA)	Animal and Plant Health Agency (APHA)
EPI2318008	HA	Japan	2022-Oct-21	EPI_ISL_16698546	A/eastern buzzard/Niigata/1501B001/2022	National Institute for Environmental Studies	Graduate School of Veterinary Medicine, Hokkaido University	Manabu, Onuma; Kei, Nabeshima; Atsushi, Haga; Hisako, Honjo; Misako, Yokoyama; Yoshihiro, Sakoda; Norikazu, Isoda; Takahiro, Hiono; Hew, Yik Lim
EPI2745876	HA	Denmark	2023-Jul-30	EPI_ISL_18271510	A/black-headed_gull/Denmark/06169-1.01/2023-07-30	Statens Serumm Institute	Statens Serum Institute	Hjulsager,Charlotte; Liang,Yuan
EPI2745884	HA	Denmark	2023-Jun-22	EPI_ISL_18271509	A/black-headed_gull/Denmark/05877-1.01/2023-06-22	Statens Serumm Institute	Statens Serum Institute	Hjulsager,Charlotte; Liang,Yuan
EPI2697518	HA	Finland	2023-Jul-11	EPI_ISL_18122447	A/black-headed-gull/Finland/7827/2023	Finnish Food Authority	Finnish Institute for Health and Welfare, THL	Tuija Kantala, Alice Fusaro, Tuija Gadd, Monica Gallo, Niina Ikonen, Lauri Kareinen, Ari Kauppinen, Niina Tammiranta, Erika Lindh
EPI2697510	HA	Finland	2023-Jul-11	EPI_ISL_18122446	A/black-headed-gull/Finland/7826/2023	Finnish Food Authority	Finnish Institute for Health and Welfare, THL	Tuija Kantala, Alice Fusaro, Tuija Gadd, Monica Gallo, Niina Ikonen, Lauri Kareinen, Ari Kauppinen, Niina Tammiranta, Erika Lindh
EPI2664950	HA	Austria	2023-Jun-05	EPI_ISL_18058692	A/black-headed gull/Austria/23072665-007/2023	Austrian Agency for Health and Food Safety (AGES)	Austrian Agency for Health and Food Safety (AGES)
EPI2664942	HA	Austria	2023-Jun-05	EPI_ISL_18058691	A/black-headed gull/Austria/23072665-002/2023	Austrian Agency for Health and Food Safety (AGES)	Austrian Agency for Health and Food Safety (AGES)
EPI2664926	HA	Austria	2023-May-12	EPI_ISL_18058689	A/black-headed gull/Austria/23063745-001/2023	Austrian Agency for Health and Food Safety (AGES)	Austrian Agency for Health and Food Safety (AGES)
EPI2664918	HA	Austria	2023-Mar-28	EPI_ISL_18058688	A/black-headed gull/Austria/23041151-001/2023	Austrian Agency for Health and Food Safety (AGES)	Austrian Agency for Health and Food Safety (AGES)
EPI2197371	HA	Poland	2022-Sep-20	EPI_ISL_15535272	A/domestic_goose/Poland/H397-N/2022	National Veterinary Research Institut Poland, PIWet-PIB	National Veterinary Research Institut Poland, PIWet-PIB	Świętoń E., Śmietanka K.
EPI2310404	HA	United States	2022-Jul-03	EPI_ISL_16632537	A/common eider/Maine/22-022526-003/2022	Cummings School of Veterinary Medicine at Tufts University	Cummings School of Veterinary Medicine at Tufts University	Chinh,Thanh; Franzen,Kerrie; Love,Emily; Killian,Mary; Lantz,Kristina; Hicks,Jessica; Norris, Cameron; Stuber,Tod; Sawatzki, Kaitlin; Puryear, Wendy; Foss, Alexa; Runstadler, Jonathan
EPI2310266	HA	United States	2022-Jul-07	EPI_ISL_16632518	A/common eider/Massachusetts/22-022527-003/2022	Cummings School of Veterinary Medicine at Tufts University	Cummings School of Veterinary Medicine at Tufts University	Chinh,Thanh; Franzen,Kerrie; Love,Emily; Killian,Mary; Lantz,Kristina; Hicks,Jessica; Norris, Cameron; Stuber,Tod; Sawatzki, Kaitlin; Puryear, Wendy; Foss, Alexa; Patel,Priya; Runstadler, Jonathan
EPI2310226	HA	United States	2022-Jul-08	EPI_ISL_16632513	A/common eider/Maine/22-022526-013/2022	Cummings School of Veterinary Medicine at Tufts University	Cummings School of Veterinary Medicine at Tufts University	Chinh,Thanh; Franzen,Kerrie; Love,Emily; Killian,Mary; Lantz,Kristina; Hicks,Jessica; Norris, Cameron; Stuber,Tod; Sawatzki, Kaitlin; Puryear, Wendy; Foss, Alexa; Runstadler, Jonathan
EPI2076349	HA	United Kingdom	2022-Mar-03	EPI_ISL_13486831	A/Common_eider/England/023549/2022	Animal and Plant Health Agency (APHA)	Animal and Plant Health Agency (APHA)
EPI2015045	HA	Denmark	2021-Oct-16	EPI_ISL_11798573	A/Eurasian_teal/Denmark/24115-2/2021-10-16	Statens Serumm Institute	Statens Serum Institute	Charlotte Hjulsager, Yuan Liang
EPI2246942	HA	Canada	2022-Mar-27	EPI_ISL_16173530	A/Turkey/ON/FAV-0162-144/2022	Ontario Veterinary College, University of Guelph	Canadian Food Inspection Agency	Alkie, Tamiru; Cox, Sherri; Ojkic, Davor; Stevens, Brian; Xu, Wanhong; Hisanaga, Tamiko; Suderman, Suderman; Koziuk, Janice; Kruczkiewicz, Peter; Nguyen, Hoang Hai; Fisher, Mathew; Lung, Oliver; Berhane, Yohannes
EPI2075666	HA	United Kingdom	2022-Jun-05	EPI_ISL_13453568	A/turkey/England/081490/2022	Animal and Plant Health Agency (APHA)	Animal and Plant Health Agency (APHA)
EPI2075658	HA	United Kingdom	2022-May-31	EPI_ISL_13453567	A/turkey/England/081395/2022	Animal and Plant Health Agency (APHA)	Animal and Plant Health Agency (APHA)
EPI2041974	HA	Israel	2021-Oct-12	EPI_ISL_12749687	A/turkey/Israel/537/2021	Kimron Veterinary Institute	Kimron Veterinary Institute	Zuckerman, N.S; Mandelboim,M; t Bucris,E; Morad,H; Geva,M; ZilbertzanItay,O; Bar-OrI,I; S.Fratty,I; Berkovitch,A; Lublin,A; Simanov,L; Hadas,R; Farnoushi,Y; Shkoda,I
EPI2001604	HA	United Kingdom	2022-Jan-12	EPI_ISL_11406399	A/turkey/England/004737/2022	Animal and Plant Health Agency (APHA)	Animal and Plant Health Agency (APHA)
EPI1963865	HA	United Kingdom	2021-Nov-16	EPI_ISL_9029957	A/turkey/England/057679/2021	Animal and Plant Health Agency (APHA)	Animal and Plant Health Agency (APHA)
EPI2218151	HA	Belgium	2022-Oct-04	EPI_ISL_15812678	A/Anas_platyrhynchos_domesticus/Belgium/11599_0005/2022	Sciensano - Animal Infectious Diseases	Sciensano, Department of Animal Infectious Diseases	Van Borm, Steven; Mathijs, Elisabeth; Roupie, Virginie; Lambrecht, Benedicte; Steensels, Mieke
EPI2310154	HA	United States	2022-Mar-21	EPI_ISL_16632504	A/american crow/Massachusetts/22-016611-007/2022	Cummings School of Veterinary Medicine at Tufts University	Cummings School of Veterinary Medicine at Tufts University	Chinh,Thanh; Franzen,Kerrie; Love,Emily; Killian,Mary; Lantz,Kristina; Hicks,Jessica; Norris, Cameron; Stuber,Tod; Sawatzki, Kaitlin; Puryear, Wendy; Foss, Alexa; Falck,Karalyn; Runstadler, Jonathan
EPI2310052	HA	United States	2022-Feb-27	EPI_ISL_16632466	A/american crow/Massachusetts/22-006976-004/2022	Cummings School of Veterinary Medicine at Tufts University	Cummings School of Veterinary Medicine at Tufts University	Chinh,Thanh; Franzen,Kerrie; Love,Emily; Killian,Mary; Lantz,Kristina; Hicks,Jessica; Norris, Cameron; Stuber,Tod; Sawatzki,Kaitlin; Puryear,Wendy; Foss,Alexa; Patel,Priya; Runstadler,Jonathan
EPI2779194	HA	Belgium	2023-Jul-11	EPI_ISL_18436064	A/Falco_peregrinus/Belgium/06764_0004/2023	Sciensano - Animal Infectious Diseases	Sciensano, Department of Animal Infectious Diseases	Van Borm, Steven; Roupie, Virginie; Hostyn, Pierre; Mathijs, Elisabeth; Lambrecht, Benedicte; Steensels, Mieke
EPI2603764	HA	Belgium	2023-Apr-11	EPI_ISL_17830868	A/Falco_peregrinus/Belgium/03518_0004/2023	Sciensano - Animal Infectious Diseases	Sciensano, Department of Animal Infectious Diseases	Van Borm, Steven; Roupie, Virginie; Hostyn, Pierre; Mathijs, Elisabeth; Lambrecht, Benedicte; Steensels, Mieke
EPI2603756	HA	Belgium	2023-Mar-07	EPI_ISL_17830866	A/Falco_peregrinus/Belgium/02026_0003/2023	Sciensano - Animal Infectious Diseases	Sciensano, Department of Animal Infectious Diseases	Van Borm, Steven; Roupie, Virginie; Hostyn, Pierre; Mathijs, Elisabeth; Lambrecht, Benedicte; Steensels, Mieke
EPI2603732	HA	Belgium	2023-Jun-07	EPI_ISL_17830837	A/Falco_peregrinus/Belgium/01145_0005/2023	Sciensano - Animal Infectious Diseases	Sciensano, Department of Animal Infectious Diseases	Van Borm, Steven; Roupie, Virginie; Hostyn, Pierre; Mathijs, Elisabeth; Lambrecht, Benedicte; Steensels, Mieke
EPI2603724	HA	Belgium	2023-Feb-07	EPI_ISL_17830836	A/Falco_peregrinus/Belgium/01145_0004/2023	Sciensano - Animal Infectious Diseases	Sciensano, Department of Animal Infectious Diseases	Van Borm, Steven; Roupie, Virginie; Hostyn, Pierre; Mathijs, Elisabeth; Lambrecht, Benedicte; Steensels, Mieke
EPI2540224	HA	Belgium	2023-Mar-07	EPI_ISL_17600912	A/Falco_peregrinus/Belgium/02026_0005/2023	Sciensano - Animal Infectious Diseases	Sciensano, Department of Animal Infectious Diseases	Van Borm, Steven; Roupie, Virginie; Hostyn, Pierre; Mathijs, Elisabeth; Lambrecht, Benedicte; Steensels, Mieke
EPI2310508	HA	Sweden	2022-Dec-31	EPI_ISL_16633749	A/ peregrine falcon/Sweden/SVA230110SZ0352/FB000084/M-2022	Swedish Veterinary Agency (SVA)	Swedish Veterinary Agency (SVA)	'Siamak,Zohari'
EPI2022937	HA	Belgium	2022-Mar-19	EPI_ISL_12210335	A/Falco_peregrinus/Belgium/4055_0002/2022	Sciensano - Animal Infectious Diseases	Sciensano, Department of Animal Infectious Diseases	Van Borm, Steven; Roupie, Virginie; Lambrecht, Benedicte; Mathijs, Elisabeth; Steensels, Mieke
EPI2872455	HA	Argentina	2023-Feb-11	EPI_ISL_18698459	A/Goose/Argentina/389-1/2023	Dirección del Laboratorio Animal, Dirección General de Laboratorios y Control Técnico, SENASA.	Instituto Nacional de Enfermedades Infecciosas Dr. C.G. Malbrán	Artuso, M.; Marchione, V.; Benedetti, E.; Chamorro, A.; Bonastre, P.; Alvarez, A.; Piccini, L.; Ponde, A.; Barrios, E.; Fabeiro, M.; Waisman, K.; Coppola, L.; Popklepovich, T.; Pontoriero, A.; Riva, D.
EPI2760334	HA	Finland	2023-Jul-18	EPI_ISL_18321751	A/canada_goose/Finland/8109_23VIR7026-20/2023	Finnish Food Authority	Istituto Zooprofilattico Sperimentale Delle Venezie	Gadd, T.; Tammiranta, N; Kantala, K.; Nokireki, T.; Pastori, A.; Zecchin, B.; Fusaro, A.; Schivo, A.; Salviato, A.; Palumbo, E.; Giussani, E.; Monne, I.; Terregino, C.
EPI2671526	HA	Spain	2023-Feb-22	EPI_ISL_18075728	A/wild_goose/Spain/1115-3-2023_23VIR6502-4/2023	Laboratorio Central de Veterinaria	Istituto Zooprofilattico Sperimentale Delle Venezie	Ruano,M.J.; Rocha,A.; Sanchez,A.; Aguero,M.; Pastori, A.; Zecchin, B.; Fusaro, A.; Schivo, A.; Salviato, A.; Palumbo, E.; Giussani, E.; Monne, I.; Terregino, C.
EPI2158704	HA	United Kingdom	2022-Aug-20	EPI_ISL_14864649	A/domestic_goose/England/107529/2022	Animal and Plant Health Agency (APHA)	Animal and Plant Health Agency (APHA)
EPI2158608	HA	United Kingdom	2022-Jun-16	EPI_ISL_14864637	A/goose/England/317610/2022	Animal and Plant Health Agency (APHA)	Animal and Plant Health Agency (APHA)
EPI2022140	HA	Netherlands	2022-Apr-05	EPI_ISL_12177628	A/goose/Netherlands/22006706-001/2022	Wageningen Bioveterinary Research	Wageningen Bioveterinary Research	Beerens, Nancy; Harders, Frank; Pritz-Verschuren, Sylvia; Roose, Marit; Venema, Sandra; Germeraad, Evelien; Engelsma, Marc; Heutink, Rene
EPI1998162	HA	Spain	2022-Feb-04	EPI_ISL_11259286	A/goose/Spain/512-2_22VIR2142-13/2022	Laboratorio Central de Veterinaria	Istituto Zooprofilattico Sperimentale delle Venezie	Ruano, M.J.; Rocha, A.; Sanchez, A.; Aguero, M; Barbierato, G.; Zecchin, B.; Fusaro, A.; Schivo, A.; Salviato, A.; Palumbo, E.; Giussani, E.; Monne, I.; Terregino, C.
EPI1998146	HA	Ireland	2022-Feb-14	EPI_ISL_11259284	A/goose/Ireland/3869_22VIR2064-2/2022	Central Veterinary Research Laboratory	Istituto Zooprofilattico Sperimentale delle Venezie	Byrne, C.; Garcia, K.; Cuartero, L.G.; Barbierato, G.; Zecchin, B.; Fusaro, A.; Schivo, A.; Salviato, A.; Palumbo, E.; Giussani, E.; Monne, I.; Terregino, C.
EPI1945283	HA	Germany	2021-Oct-25	EPI_ISL_7753425	A/greylag goose/Germany-SH/AI06205/2021	Landeslabor Schleswig-Holstein	Friedrich-Loeffler-Institut
EPI1945267	HA	Germany	2021-Oct-25	EPI_ISL_7753406	A/greylag goose/Germany-SH/AI06144/2021	Landeslabor Schleswig-Holstein	Friedrich-Loeffler-Institut
EPI1945251	HA	Germany	2021-Oct-22	EPI_ISL_7753400	A/domestic goose/Germany-SH/AI06024/2021	Landeslabor Schleswig-Holstein	Friedrich-Loeffler-Institut
EPI1945243	HA	Germany	2021-Oct-22	EPI_ISL_7753399	A/domestic goose/Germany-SH/AI06150/2021	Landeslabor Schleswig-Holstein	Friedrich-Loeffler-Institut
EPI1945235	HA	Germany	2021-Oct-22	EPI_ISL_7753396	A/domestic goose/Germany-SH/AI06147/2021	Landeslabor Schleswig-Holstein	Friedrich-Loeffler-Institut
EPI1945195	HA	Germany	2021-Oct-20	EPI_ISL_7753309	A/lesser white-fronted goose/Germany-MV/AI05973/2021	Landesamt für Landwirtschaft, Lebensmittelsicherheit und Fischerei (LALLF)	Friedrich-Loeffler-Institut
EPI1945171	HA	Germany	2021-Oct-19	EPI_ISL_7753251	A/barnacle goose/Germany-SH/AI06005/2021	Landeslabor Schleswig-Holstein	Friedrich-Loeffler-Institut
EPI2022124	HA	Netherlands	2022-Mar-23	EPI_ISL_12177626	A/greylag goose/Netherlands/22005847-001/2022	Wageningen Bioveterinary Research	Wageningen Bioveterinary Research	Beerens, Nancy; Harders, Frank; Pritz-Verschuren, Sylvia; Roose, Marit; Venema, Sandra; Germeraad, Evelien; Engelsma, Marc; Heutink, Rene
EPI1927093	HA	Netherlands	2021-Oct-19	EPI_ISL_6328001	A/greylag goose/Netherlands/21037497-001/2021	Wageningen Bioveterinary Research	Wageningen Bioveterinary Research	Beerens, Nancy; Harders, Frank; Pritz-Verschuren, Sylvia; Roose, Marit; Germeraad, Evelien; Engelsma, Marc; Heutink, Rene
EPI2760382	HA	Finland	2023-Jul-21	EPI_ISL_18321757	A/black-headed_gull/Finland/8141_23VIR7026-11/2023	Finnish Food Authority	Istituto Zooprofilattico Sperimentale Delle Venezie	Gadd, T.; Tammiranta, N; Kantala, K.; Nokireki, T.; Pastori, A.; Zecchin, B.; Fusaro, A.; Schivo, A.; Salviato, A.; Palumbo, E.; Giussani, E.; Monne, I.; Terregino, C.
EPI2760374	HA	Finland	2023-Jul-20	EPI_ISL_18321756	A/black-headed_gull/Finland/8254_23VIR7026-19/2023	Finnish Food Authority	Istituto Zooprofilattico Sperimentale Delle Venezie	Gadd, T.; Tammiranta, N; Kantala, K.; Nokireki, T.; Pastori, A.; Zecchin, B.; Fusaro, A.; Schivo, A.; Salviato, A.; Palumbo, E.; Giussani, E.; Monne, I.; Terregino, C.
EPI2760366	HA	Finland	2023-Jul-20	EPI_ISL_18321755	A/black-headed_gull/Finland/8107_23VIR7026-7/2023	Finnish Food Authority	Istituto Zooprofilattico Sperimentale Delle Venezie	Gadd, T.; Tammiranta, N; Kantala, K.; Nokireki, T.; Pastori, A.; Zecchin, B.; Fusaro, A.; Schivo, A.; Salviato, A.; Palumbo, E.; Giussani, E.; Monne, I.; Terregino, C.
EPI2760358	HA	Finland	2023-Jul-20	EPI_ISL_18321754	A/black-headed_gull/Finland/8096_23VIR7026-6/2023	Finnish Food Authority	Istituto Zooprofilattico Sperimentale Delle Venezie	Gadd, T.; Tammiranta, N; Kantala, K.; Nokireki, T.; Pastori, A.; Zecchin, B.; Fusaro, A.; Schivo, A.; Salviato, A.; Palumbo, E.; Giussani, E.; Monne, I.; Terregino, C.
EPI2760326	HA	Finland	2023-Jul-12	EPI_ISL_18321750	A/black-headed_gull/Finland/8081_23VIR6928-12/2023	Finnish Food Authority	Istituto Zooprofilattico Sperimentale Delle Venezie	Gadd, T.; Tammiranta, N; Kantala, K.; Nokireki, T.; Pastori, A.; Zecchin, B.; Fusaro, A.; Schivo, A.; Salviato, A.; Palumbo, E.; Giussani, E.; Monne, I.; Terregino, C.
EPI2760318	HA	Finland	2023-Jul-12	EPI_ISL_18321749	A/black-headed_gull/Finland/8079_23VIR6928-11/2023	Finnish Food Authority	Istituto Zooprofilattico Sperimentale Delle Venezie	Gadd, T.; Tammiranta, N; Kantala, K.; Nokireki, T.; Pastori, A.; Zecchin, B.; Fusaro, A.; Schivo, A.; Salviato, A.; Palumbo, E.; Giussani, E.; Monne, I.; Terregino, C.
EPI2760310	HA	Finland	2023-Jul-12	EPI_ISL_18321748	A/black-headed_gull/Finland/8078_23VIR6928-10/2023	Finnish Food Authority	Istituto Zooprofilattico Sperimentale Delle Venezie	Gadd, T.; Tammiranta, N; Kantala, K.; Nokireki, T.; Pastori, A.; Zecchin, B.; Fusaro, A.; Schivo, A.; Salviato, A.; Palumbo, E.; Giussani, E.; Monne, I.; Terregino, C.
EPI2760302	HA	Finland	2023-Jul-12	EPI_ISL_18321747	A/black-headed_gull/Finland/8077_23VIR6928-9/2023	Finnish Food Authority	Istituto Zooprofilattico Sperimentale Delle Venezie	Gadd, T.; Tammiranta, N; Kantala, K.; Nokireki, T.; Pastori, A.; Zecchin, B.; Fusaro, A.; Schivo, A.; Salviato, A.; Palumbo, E.; Giussani, E.; Monne, I.; Terregino, C.
EPI2671566	HA	Spain	2023-Mar-07	EPI_ISL_18075733	A/black-headed_gull/Spain/1528-7-2023_23VIR6502-9/2023	Laboratorio Central de Veterinaria	Istituto Zooprofilattico Sperimentale Delle Venezie	Ruano,M.J.; Rocha,A.; Sanchez,A.; Aguero,M.; Pastori, A.; Zecchin, B.; Fusaro, A.; Schivo, A.; Salviato, A.; Palumbo, E.; Giussani, E.; Monne, I.; Terregino, C.
EPI2671558	HA	Spain	2023-Mar-16	EPI_ISL_18075732	A/black-headed_gull/Spain/1509-1-2023_23VIR6502-8/2023	Laboratorio Central de Veterinaria	Istituto Zooprofilattico Sperimentale Delle Venezie	Ruano,M.J.; Rocha,A.; Sanchez,A.; Aguero,M.; Pastori, A.; Zecchin, B.; Fusaro, A.; Schivo, A.; Salviato, A.; Palumbo, E.; Giussani, E.; Monne, I.; Terregino, C.
EPI2671550	HA	Spain	2023-Mar-07	EPI_ISL_18075731	A/black-headed_gull/Spain/1399-5-2023_23VIR6502-7/2023	Laboratorio Central de Veterinaria	Istituto Zooprofilattico Sperimentale Delle Venezie	Ruano,M.J.; Rocha,A.; Sanchez,A.; Aguero,M.; Pastori, A.; Zecchin, B.; Fusaro, A.; Schivo, A.; Salviato, A.; Palumbo, E.; Giussani, E.; Monne, I.; Terregino, C.
EPI2671542	HA	Spain	2023-Feb-21	EPI_ISL_18075730	A/black-headed_gull/Spain/1193-1-2023_23VIR6502-6/2023	Laboratorio Central de Veterinaria	Istituto Zooprofilattico Sperimentale Delle Venezie	Ruano,M.J.; Rocha,A.; Sanchez,A.; Aguero,M.; Pastori, A.; Zecchin, B.; Fusaro, A.; Schivo, A.; Salviato, A.; Palumbo, E.; Giussani, E.; Monne, I.; Terregino, C.
EPI2671534	HA	Spain	2023-Feb-22	EPI_ISL_18075729	A/black-headed_gull/Spain/1168-1-2023_23VIR6502-5/2023	Laboratorio Central de Veterinaria	Istituto Zooprofilattico Sperimentale Delle Venezie	Ruano,M.J.; Rocha,A.; Sanchez,A.; Aguero,M.; Pastori, A.; Zecchin, B.; Fusaro, A.; Schivo, A.; Salviato, A.; Palumbo, E.; Giussani, E.; Monne, I.; Terregino, C.
EPI2671510	HA	Spain	2023-Jun-27	EPI_ISL_18075726	A/mediterranean_gull/Spain/2994-9-2023_23VIR6502-37/2023	Laboratorio Central de Veterinaria	Istituto Zooprofilattico Sperimentale Delle Venezie	Ruano,M.J.; Rocha,A.; Sanchez,A.; Aguero,M.; Pastori, A.; Zecchin, B.; Fusaro, A.; Schivo, A.; Salviato, A.; Palumbo, E.; Giussani, E.; Monne, I.; Terregino, C.
EPI2671479	HA	Spain	2023-Jun-20	EPI_ISL_18075722	A/mediterranean_gull/Spain/2886-14-2023_23VIR6502-31/2023	Laboratorio Central de Veterinaria	Istituto Zooprofilattico Sperimentale Delle Venezie	Ruano,M.J.; Rocha,A.; Sanchez,A.; Aguero,M.; Pastori, A.; Zecchin, B.; Fusaro, A.; Schivo, A.; Salviato, A.; Palumbo, E.; Giussani, E.; Monne, I.; Terregino, C.
EPI2671464	HA	Spain	2023-Feb-14	EPI_ISL_18075720	A/black-headed_gull/Spain/929-18-2023_23VIR6502-2/2023	Laboratorio Central de Veterinaria	Istituto Zooprofilattico Sperimentale Delle Venezie	Ruano,M.J.; Rocha,A.; Sanchez,A.; Aguero,M.; Pastori, A.; Zecchin, B.; Fusaro, A.; Schivo, A.; Salviato, A.; Palumbo, E.; Giussani, E.; Monne, I.; Terregino, C.
EPI2671368	HA	Spain	2023-May-30	EPI_ISL_18075708	A/yellow-legged_gull/Spain/2679-1-2023_23VIR6502-15/2023	Laboratorio Central de Veterinaria	Istituto Zooprofilattico Sperimentale Delle Venezie	Ruano,M.J.; Rocha,A.; Sanchez,A.; Aguero,M.; Pastori, A.; Zecchin, B.; Fusaro, A.; Schivo, A.; Salviato, A.; Palumbo, E.; Giussani, E.; Monne, I.; Terregino, C.
EPI2134030	HA	South Africa	2021-May-17	EPI_ISL_14619009	A/Hartlaubs gull/South Africa/21050295/2021 (H5N1)	Western Cape Provincial Veterinary Laboratory	University of Pretoria	Abolnik, Celia
EPI2792307	HA	Russian Federation	2023-Oct-11	EPI_ISL_18501405	A/european herring gull/Leningrad region/RII-WD437/2023	Smorodintsev Research Institute of Influenza	WHO National Influenza Centre Russian Federation	Andrey, Komissarov; Artem, Fadeev; Nikita, Yolshin; Anna, Ivanova; Maria, Pisareva; Alena, Zheltukhina; Daria, Danilenko; Dmitry, Lioznov
EPI2792299	HA	Russian Federation	2023-Oct-11	EPI_ISL_18501404	A/european herring gull/Leningrad region/RII-WD385/2023	Smorodintsev Research Institute of Influenza	WHO National Influenza Centre Russian Federation	Andrey, Komissarov; Artem, Fadeev; Nikita, Yolshin; Anna, Ivanova; Maria, Pisareva; Alena, Zheltukhina; Daria, Danilenko; Dmitry, Lioznov
EPI2792291	HA	Russian Federation	2023-Oct-11	EPI_ISL_18501403	A/european herring gull/Leningrad region/RII-WD477/2023	Smorodintsev Research Institute of Influenza	WHO National Influenza Centre Russian Federation	Andrey, Komissarov; Artem, Fadeev; Nikita, Yolshin; Anna, Ivanova; Maria, Pisareva; Alena, Zheltukhina; Daria, Danilenko; Dmitry, Lioznov
EPI2792283	HA	Russian Federation	2023-Oct-11	EPI_ISL_18501402	A/european herring gull/Leningrad region/RII-WD568/2023	Smorodintsev Research Institute of Influenza	WHO National Influenza Centre Russian Federation	Andrey, Komissarov; Artem, Fadeev; Nikita, Yolshin; Anna, Ivanova; Maria, Pisareva; Alena, Zheltukhina; Daria, Danilenko; Dmitry, Lioznov
EPI2792275	HA	Russian Federation	2023-Oct-11	EPI_ISL_18501401	A/european herring gull/Leningrad region/RII-WD392/2023	Smorodintsev Research Institute of Influenza	WHO National Influenza Centre Russian Federation	Andrey, Komissarov; Artem, Fadeev; Nikita, Yolshin; Anna, Ivanova; Maria, Pisareva; Alena, Zheltukhina; Daria, Danilenko; Dmitry, Lioznov
EPI2792267	HA	Russian Federation	2023-Oct-11	EPI_ISL_18501400	A/european herring gull/Leningrad region/RII-WD485/2023	Smorodintsev Research Institute of Influenza	WHO National Influenza Centre Russian Federation	Andrey, Komissarov; Artem, Fadeev; Nikita, Yolshin; Anna, Ivanova; Maria, Pisareva; Alena, Zheltukhina; Daria, Danilenko; Dmitry, Lioznov
EPI2792243	HA	Russian Federation	2023-Oct-11	EPI_ISL_18501397	A/european herring gull/Leningrad region/RII-WD492/2023	Smorodintsev Research Institute of Influenza	WHO National Influenza Centre Russian Federation	Andrey, Komissarov; Artem, Fadeev; Nikita, Yolshin; Anna, Ivanova; Maria, Pisareva; Alena, Zheltukhina; Daria, Danilenko; Dmitry, Lioznov
EPI2792219	HA	Russian Federation	2023-Oct-11	EPI_ISL_18501394	A/european herring gull/Leningrad region/RII-WD460/2023	Smorodintsev Research Institute of Influenza	WHO National Influenza Centre Russian Federation	Andrey, Komissarov; Artem, Fadeev; Nikita, Yolshin; Anna, Ivanova; Maria, Pisareva; Alena, Zheltukhina; Daria, Danilenko; Dmitry, Lioznov
EPI2779203	HA	Belgium	2023-Aug-08	EPI_ISL_18436067	A/Larus_argentatus/Belgium/07522_0002/2023	Sciensano - Animal Infectious Diseases	Sciensano, Department of Animal Infectious Diseases	Van Borm, Steven; Roupie, Virginie; Hostyn, Pierre; Mathijs, Elisabeth; Lambrecht, Benedicte; Steensels, Mieke
EPI2759267	HA	Russian Federation	2023-Aug-02	EPI_ISL_18304551	A/european herring gull/Leningrad_region/RII-WD308/2023	WHO National Influenza Centre Russian Federation	WHO National Influenza Centre Russian Federation	Andrey, Komissarov; Artem, Fadeev; Nikita, Yolshin; Anna, Ivanova; Maria, Pisareva; Alena, Zheltukhina; Daria, Danilenko; Dmitry, Lioznov
EPI2397400	HA	Sweden	2022-Dec-20	EPI_ISL_16896360	A/European Herring gull/Sweden/SVA230112SZ0325/FB000130/M-2022	Swedish Veterinary Agency (SVA)	Swedish Veterinary Agency (SVA)	'Siamak,Zohari'
EPI2310516	HA	Sweden	2023-Jan-01	EPI_ISL_16633751	A/European herring gull/Sweden/SVAU230110SZ0354/FB000085/M-2023	Swedish Veterinary Agency (SVA)	Swedish Veterinary Agency (SVA)	'Siamak,Zohari'
EPI2247340	HA	Canada	2022-Jan-31	EPI_ISL_16190850	A/Herring Gull/NL/FAV-0091-01/2022	Atlantic Veterinary College, University of Prince Edward Island	Canadian Food Inspection Agency	Alkie, Tamiru; Yason, Carmencita; Jones, Megan E. B.; Bourque, Laura; Xu, Wanhong; Hisanaga, Tamiko; Suderman, Suderman; Koziuk, Janice; Kruczkiewicz, Peter; Nguyen, Hoang Hai; Fisher, Mathew; Lung, Oliver; Berhane, Yohannes
EPI2122825	HA	Belgium	2022-Jan-06	EPI_ISL_14389133	A/Larus_argentatus/Belgium/595_0008/2022	Sciensano - Animal Infectious Diseases	Sciensano, Department of Animal Infectious Diseases	Van Borm, Steven; Vandenbussche, Frank; Roupie, Virginie; Lambrecht, Benedicte; Steensels, Mieke
EPI2397440	HA	Sweden	2023-Jan-19	EPI_ISL_16896605	A/common gull /Sweden/SVA230125SZ0060/FB000197/AB-2023	Swedish Veterinary Agency (SVA)	Swedish Veterinary Agency (SVA)	'Siamak,Zohari'
EPI2022148	HA	Netherlands	2022-Apr-05	EPI_ISL_12177629	A/black-backed gull/Netherlands/22006711-001/2022	Wageningen Bioveterinary Research	Wageningen Bioveterinary Research	Beerens, Nancy; Harders, Frank; Pritz-Verschuren, Sylvia; Roose, Marit; Venema, Sandra; Germeraad, Evelien; Engelsma, Marc; Heutink, Rene
EPI2247332	HA	Canada	2021-Nov-04	EPI_ISL_16190849	A/Great Black-Backed Gull/NL/OTH-0114	Atlantic Veterinary College, University of Prince Edward Island	Canadian Food Inspection Agency	Alkie, Tamiru; Yason, Carmencita; Jones, Megan E. B.; Bourque, Laura; Xu, Wanhong; Hisanaga, Tamiko; Suderman, Suderman; Koziuk, Janice; Kruczkiewicz, Peter; Nguyen, Hoang Hai; Fisher, Mathew; Lung, Oliver; Berhane, Yohannes
EPI2792251	HA	Russian Federation	2023-Oct-11	EPI_ISL_18501398	A/black-headed gull/Leningrad region/RII-WD359/2023	Smorodintsev Research Institute of Influenza	WHO National Influenza Centre Russian Federation	Andrey, Komissarov; Artem, Fadeev; Nikita, Yolshin; Anna, Ivanova; Maria, Pisareva; Alena, Zheltukhina; Daria, Danilenko; Dmitry, Lioznov
EPI2792227	HA	Russian Federation	2023-Oct-11	EPI_ISL_18501395	A/black-headed gull/Leningrad region/RII-WD317Mb/2023	Smorodintsev Research Institute of Influenza	WHO National Influenza Centre Russian Federation	Andrey, Komissarov; Artem, Fadeev; Nikita, Yolshin; Anna, Ivanova; Maria, Pisareva; Alena, Zheltukhina; Daria, Danilenko; Dmitry, Lioznov
EPI2758655	HA	Russian Federation	2023-Feb-02	EPI_ISL_18304169	A/black-headed gull/Leningrad_region/RII-WD299/2023	WHO National Influenza Centre Russian Federation	WHO National Influenza Centre Russian Federation	Andrey, Komissarov; Artem, Fadeev; Nikita, Yolshin; Anna, Ivanova; Maria, Pisareva; Alena, Zheltukhina; Daria, Danilenko; Dmitry, Lioznov
EPI2779186	HA	Belgium	2023-Jul-12	EPI_ISL_18435919	A/Sterna_hirundo/Belgium/06764_0002/2023	Sciensano - Animal Infectious Diseases	Sciensano, Department of Animal Infectious Diseases	Van Borm, Steven; Roupie, Virginie; Hostyn, Pierre; Mathijs, Elisabeth; Lambrecht, Benedicte; Steensels, Mieke
EPI2198612	HA	United Kingdom	2022-Aug-26	EPI_ISL_15585906	A/pheasant/England/393437/2022	Animal and Plant Health Agency (APHA)	Animal and Plant Health Agency (APHA)
EPI2198604	HA	United Kingdom	2022-Oct-15	EPI_ISL_15585905	A/pheasant/England/251536/2022	Animal and Plant Health Agency (APHA)	Animal and Plant Health Agency (APHA)
EPI2198596	HA	United Kingdom	2022-Sep-05	EPI_ISL_15585904	A/pheasant/England/132162/2022	Animal and Plant Health Agency (APHA)	Animal and Plant Health Agency (APHA)
EPI2653535	HA	Slovenia	2023-Feb-23	EPI_ISL_18042392	A/mute_swan/Slovenia/242_23VIR1977-11/2023	University of Ljubljana	Istituto Zooprofilattico Sperimentale Delle Venezie	Slavec, B.; Kvapil, P.; Paller, T.; Pastori, A.; Zecchin, B.; Fusaro, A.; Schivo, A.; Salviato, A.; Palumbo, E.; Giussani, E.; Monne, I.; Terregino, C.
EPI2653519	HA	Slovenia	2023-Feb-21	EPI_ISL_18042390	A/mute_swan/Slovenia/241_23VIR1977-13/2023	University of Ljubljana	Istituto Zooprofilattico Sperimentale Delle Venezie	Slavec, B.; Kvapil, P.; Paller, T.; Pastori, A.; Zecchin, B.; Fusaro, A.; Schivo, A.; Salviato, A.; Palumbo, E.; Giussani, E.; Monne, I.; Terregino, C.
EPI2653511	HA	Slovenia	2023-Feb-20	EPI_ISL_18042389	A/mute_swan/Slovenia/237_23VIR1977-8/2023	University of Ljubljana	Istituto Zooprofilattico Sperimentale Delle Venezie	Slavec, B.; Kvapil, P.; Paller, T.; Pastori, A.; Zecchin, B.; Fusaro, A.; Schivo, A.; Salviato, A.; Palumbo, E.; Giussani, E.; Monne, I.; Terregino, C.
EPI2653503	HA	Slovenia	2023-Feb-17	EPI_ISL_18042388	A/mute_swan/Slovenia/236_23VIR1977-9/2023	University of Ljubljana	Istituto Zooprofilattico Sperimentale Delle Venezie	Slavec, B.; Kvapil, P.; Paller, T.; Pastori, A.; Zecchin, B.; Fusaro, A.; Schivo, A.; Salviato, A.; Palumbo, E.; Giussani, E.; Monne, I.; Terregino, C.
EPI2576646	HA	Austria	2023-Mar-02	EPI_ISL_17716087	A/mute swan/Austria/23026929-001/2023	Austrian Agency for Health and Food Safety (AGES)	Austrian Agency for Health and Food Safety (AGES)
EPI2576630	HA	Austria	2023-Jan-31	EPI_ISL_17716084	A/mute swan/Austria/23011165-001/2023	Austrian Agency for Health and Food Safety (AGES)	Austrian Agency for Health and Food Safety (AGES)
EPI2576614	HA	Austria	2023-Jan-12	EPI_ISL_17716082	A/mute swan/Austria/23003807-001/2023	Austrian Agency for Health and Food Safety (AGES)	Austrian Agency for Health and Food Safety (AGES)
EPI2576606	HA	Austria	2023-Jan-10	EPI_ISL_17716081	A/mute swan/Austria/23002060-001/2023	Austrian Agency for Health and Food Safety (AGES)	Austrian Agency for Health and Food Safety (AGES)
EPI2576598	HA	Austria	2023-Jan-05	EPI_ISL_17716080	A/mute swan/Austria/23001568-001/2023	Austrian Agency for Health and Food Safety (AGES)	Austrian Agency for Health and Food Safety (AGES)
EPI2576438	HA	Austria	2023-Jan-26	EPI_ISL_17716059	A/swan/Austria/23009525-001/2023	Austrian Agency for Health and Food Safety (AGES)	Austrian Agency for Health and Food Safety (AGES)
EPI2576430	HA	Austria	2023-Jan-23	EPI_ISL_17716058	A/swan/Austria/23007285-001/2023	Austrian Agency for Health and Food Safety (AGES)	Austrian Agency for Health and Food Safety (AGES)
EPI2576422	HA	Austria	2023-Jan-18	EPI_ISL_17716057	A/coscoroba swan/Austria/23005657-003/2023	Austrian Agency for Health and Food Safety (AGES)	Austrian Agency for Health and Food Safety (AGES)
EPI1999321	HA	Netherlands	2022-Mar-04	EPI_ISL_11325892	A/swan/Netherlands/22005126-001/2022	Wageningen Bioveterinary Research	Wageningen Bioveterinary Research	Beerens, Nancy; Harders, Frank; Pritz-Verschuren, Sylvia; Roose, Marit; Venema, Sandra; Germeraad, Evelien; Engelsma, Marc; Heutink, Rene
EPI1998210	HA	Spain	2021-Dec-22	EPI_ISL_11259292	A/swan/Spain/4087-1_22VIR2142-1/2021	Laboratorio Central de Veterinaria	Istituto Zooprofilattico Sperimentale delle Venezie	Ruano, M.J.; Rocha, A.; Sanchez, A.; Aguero, M; Barbierato, G.; Zecchin, B.; Fusaro, A.; Schivo, A.; Salviato, A.; Palumbo, E.; Giussani, E.; Monne, I.; Terregino, C.
EPI1927101	HA	Netherlands	2021-Nov-01	EPI_ISL_6328009	A/swan/Netherlands/21037791-001/2021	Wageningen Bioveterinary Research	Wageningen Bioveterinary Research	Beerens, Nancy; Harders, Frank; Pritz-Verschuren, Sylvia; Roose, Marit; Germeraad, Evelien; Engelsma, Marc; Heutink, Rene
EPI2279750	HA	Japan	2022-Nov-23	EPI_ISL_16388458	A/whooper swan/Akita/0511B002/2022	National Institute for Environmental Studies	Graduate School of Veterinary Medicine, Hokkaido University	Manabu, ONUMA; Kei, NABESHIMA; Atsushi, HAGA; Hisako, HONJO; Misako, YOKOYAMA; Yoshihiro, SAKODA; Norikazu, ISODA; Takahiro, HIONO
EPI2777572	HA	Croatia	2022-Feb-09	EPI_ISL_18420062	A/mute swan/Croatia/26-b/2022	Croatian Veterinary Institute, Poultry Centre	Istituto Zooprofilattico Sperimentale Delle Venezie	Savić, Vladimir; Pastori, Ambra; Zecchin, Bianca; Fusaro, Alice; Schivo, Alessia; Salviato, Annalisa; Palumbo, Elisa; Giussani, Edoardo; Monne, Isabella; Terregino, Calogero
EPI2022156	HA	Netherlands	2022-Apr-05	EPI_ISL_12177630	A/mute swan/Netherlands/22006712-002/2022	Wageningen Bioveterinary Research	Wageningen Bioveterinary Research	Beerens, Nancy; Harders, Frank; Pritz-Verschuren, Sylvia; Roose, Marit; Venema, Sandra; Germeraad, Evelien; Engelsma, Marc; Heutink, Rene
EPI1928148	HA	France	2021-Nov-08	EPI_ISL_6590766	A/swan/France/21P012384/2021	Anses (Ploufragan-Plouzané)	ANSES Agence Nationale De Securite Sanitaire De L’alimentation
EPI1927124	HA	Czech Republic	2021-Nov-01	EPI_ISL_6328409	A/mute swan/Czech Republic/21312/2021	State Veterinary Institute Prague	State Veterinary Institute Prague	Nagy,Alexander;Cernikova,Lenka;Stara,Martina
EPI1924149	HA	Netherlands	2021-Oct-24	EPI_ISL_5804788	A/Mute swan/Netherlands/21037283-002/2021	Wageningen Bioveterinary Research	Wageningen Bioveterinary Research	Beerens, Nancy; Harders, Frank; Pritz-Verschuren, Sylvia; Roose, Marit; Germeraad, Evelien; Engelsma, Marc; Heutink, Rene
EPI1924123	HA	United Kingdom	2021-Oct-24	EPI_ISL_5804708	A/mute_swan/England/053054/2021	Animal and Plant Health Agency (APHA)	Animal and Plant Health Agency (APHA)
EPI3138103	HA	Denmark	2023-Nov-04	EPI_ISL_18992915	A/turkey/Denmark/08382-12/2023	Statens Serum Institut	Statens Serum Institute	Hjulsager,C;Liang,Y
EPI3138095	HA	Denmark	2023-Nov-04	EPI_ISL_18992914	A/turkey/Denmark/08382-1/2023	Statens Serum Institut	Statens Serum Institute	Hjulsager,C;Liang,Y
EPI2872831	HA	Argentina	2023-Apr-19	EPI_ISL_18698514	A/Turkey/Argentina/1711-2/2023	Dirección del Laboratorio Animal, Dirección General de Laboratorios y Control Técnico, SENASA.	Instituto Nacional de Enfermedades Infecciosas Dr. C.G. Malbrán	Artuso, M.; Marchione, V.; Benedetti, E.; Chamorro, A.; Bonastre, P.; Alvarez, A.; Piccini, L.; Ponde, A.; Barrios, E.; Fabeiro, M.; Waisman, K.; Coppola, L.; Popklepovich, T.; Pontoriero, A.; Riva, D.
EPI2872823	HA	Argentina	2023-Apr-17	EPI_ISL_18698513	A/Turkey/Argentina/1710-1/2023	Dirección del Laboratorio Animal, Dirección General de Laboratorios y Control Técnico, SENASA.	Instituto Nacional de Enfermedades Infecciosas Dr. C.G. Malbrán	Artuso, M.; Marchione, V.; Benedetti, E.; Chamorro, A.; Bonastre, P.; Alvarez, A.; Piccini, L.; Ponde, A.; Barrios, E.; Fabeiro, M.; Waisman, K.; Coppola, L.; Popklepovich, T.; Pontoriero, A.; Riva, D.
EPI2872784	HA	Argentina	2023-Mar-31	EPI_ISL_18698508	A/Turkey/Argentina/1348-3/2023	Dirección del Laboratorio Animal, Dirección General de Laboratorios y Control Técnico, SENASA.	Instituto Nacional de Enfermedades Infecciosas Dr. C.G. Malbrán	Artuso, M.; Marchione, V.; Benedetti, E.; Chamorro, A.; Bonastre, P.; Alvarez, A.; Piccini, L.; Ponde, A.; Barrios, E.; Fabeiro, M.; Waisman, K.; Coppola, L.; Popklepovich, T.; Pontoriero, A.; Riva, D.
EPI2872711	HA	Argentina	2023-Mar-04	EPI_ISL_18698497	A/Turkey/Argentina/753-1/2023	Dirección del Laboratorio Animal, Dirección General de Laboratorios y Control Técnico, SENASA.	Instituto Nacional de Enfermedades Infecciosas Dr. C.G. Malbrán	Artuso, M.; Marchione, V.; Benedetti, E.; Chamorro, A.; Bonastre, P.; Alvarez, A.; Piccini, L.; Ponde, A.; Barrios, E.; Fabeiro, M.; Waisman, K.; Coppola, L.; Popklepovich, T.; Pontoriero, A.; Riva, D.
EPI2198668	HA	United Kingdom	2022-Oct-18	EPI_ISL_15585920	A/turkey/Wales/132240/2022	Animal and Plant Health Agency (APHA)	Animal and Plant Health Agency (APHA)
EPI2198660	HA	United Kingdom	2022-Oct-17	EPI_ISL_15585919	A/turkey/England/133112/2022	Animal and Plant Health Agency (APHA)	Animal and Plant Health Agency (APHA)
EPI2198652	HA	United Kingdom	2022-Oct-15	EPI_ISL_15585911	A/turkey/England/132948/2022	Animal and Plant Health Agency (APHA)	Animal and Plant Health Agency (APHA)
EPI2198644	HA	United Kingdom	2022-Oct-15	EPI_ISL_15585910	A/turkey/England/132460/2022	Animal and Plant Health Agency (APHA)	Animal and Plant Health Agency (APHA)
EPI2198636	HA	United Kingdom	2022-Oct-15	EPI_ISL_15585909	A/turkey/England/132310/2022	Animal and Plant Health Agency (APHA)	Animal and Plant Health Agency (APHA)
EPI2198628	HA	United Kingdom	2022-Sep-26	EPI_ISL_15585908	A/turkey/England/125196/2022	Animal and Plant Health Agency (APHA)	Animal and Plant Health Agency (APHA)
EPI2198620	HA	United Kingdom	2022-Sep-21	EPI_ISL_15585907	A/turkey/England/122476/2022	Animal and Plant Health Agency (APHA)	Animal and Plant Health Agency (APHA)
EPI2198284	HA	United Kingdom	2022-Oct-11	EPI_ISL_15585844	A/Turkey/England/130299/2022	Animal and Plant Health Agency (APHA)	Animal and Plant Health Agency (APHA)
EPI2198276	HA	United Kingdom	2022-Oct-10	EPI_ISL_15585843	A/Turkey/England/130119/2022	Animal and Plant Health Agency (APHA)	Animal and Plant Health Agency (APHA)
EPI2198268	HA	United Kingdom	2022-Oct-10	EPI_ISL_15585842	A/Turkey/England/130038/2022	Animal and Plant Health Agency (APHA)	Animal and Plant Health Agency (APHA)
EPI2198260	HA	United Kingdom	2022-Oct-10	EPI_ISL_15585841	A/Turkey/England/129968/2022	Animal and Plant Health Agency (APHA)	Animal and Plant Health Agency (APHA)
EPI2198252	HA	United Kingdom	2022-Oct-10	EPI_ISL_15585840	A/Turkey/England/129898/2022	Animal and Plant Health Agency (APHA)	Animal and Plant Health Agency (APHA)
EPI2198244	HA	United Kingdom	2022-Oct-09	EPI_ISL_15585839	A/Turkey/England/129035/2022	Animal and Plant Health Agency (APHA)	Animal and Plant Health Agency (APHA)
EPI2198236	HA	United Kingdom	2022-Oct-09	EPI_ISL_15585765	A/Turkey/England/128999/2022	Animal and Plant Health Agency (APHA)	Animal and Plant Health Agency (APHA)
EPI2198228	HA	United Kingdom	2022-Oct-07	EPI_ISL_15585764	A/Turkey/England/128362/2022	Animal and Plant Health Agency (APHA)	Animal and Plant Health Agency (APHA)
EPI2198220	HA	United Kingdom	2022-Oct-06	EPI_ISL_15585763	A/Turkey/England/127741/2022	Animal and Plant Health Agency (APHA)	Animal and Plant Health Agency (APHA)
EPI2158720	HA	United Kingdom	2022-Aug-28	EPI_ISL_14864651	A/chicken/England/112410/2022	Animal and Plant Health Agency (APHA)	Animal and Plant Health Agency (APHA)
EPI2158712	HA	United Kingdom	2022-Aug-26	EPI_ISL_14864650	A/turkey/England/111923/2022	Animal and Plant Health Agency (APHA)	Animal and Plant Health Agency (APHA)
EPI1945187	HA	Germany	2021-Oct-20	EPI_ISL_7753290	A/turkey/Germany-MV/AI06035/2021	Landesamt für Landwirtschaft, Lebensmittelsicherheit und Fischerei (LALLF)	Friedrich-Loeffler-Institut
EPI2760342	HA	Finland	2023-Jul-18	EPI_ISL_18321752	A/great_crested_grebe/Finland/8111_23VIR7026-21/2023	Finnish Food Authority	Istituto Zooprofilattico Sperimentale Delle Venezie	Gadd, T.; Tammiranta, N; Kantala, K.; Nokireki, T.; Pastori, A.; Zecchin, B.; Fusaro, A.; Schivo, A.; Salviato, A.; Palumbo, E.; Giussani, E.; Monne, I.; Terregino, C.
EPI2744294	HA	Sweden	2023-Jun-26	EPI_ISL_18255419	A/common guillemot/Sweden/SVA230627SZ0006/FB002112/I-2023	Swedish Veterinary Agency (SVA)	Swedish Veterinary Agency (SVA)	"Siamak,Zohari"
EPI2744270	HA	Sweden	2023-Jul-20	EPI_ISL_18255416	A/Lesser auk/Sweden/SVA230720SZ0315/FB002445/I-2023	Swedish Veterinary Agency (SVA)	Swedish Veterinary Agency (SVA)	"Siamak,Zohari"
EPI2744262	HA	Sweden	2023-Jul-20	EPI_ISL_18255405	A/common tern/Sweden/SVA230720SZ0277/FB002468/I-2023	Swedish Veterinary Agency (SVA)	Swedish Veterinary Agency (SVA)	"Siamak,Zohari"
EPI2744254	HA	Sweden	2023-Jul-20	EPI_ISL_18255396	A/common guillemot/Sweden/SVA230720SZ0277/FB002470/I-2023	Swedish Veterinary Agency (SVA)	Swedish Veterinary Agency (SVA)	"Siamak,Zohari"
EPI2744246	HA	Sweden	2023-Jul-20	EPI_ISL_18255395	A/common guillemot/Sweden/SVA230720SZ0277/FB002471/I-2023	Swedish Veterinary Agency (SVA)	Swedish Veterinary Agency (SVA)	"Siamak, Zohari"
EPI2744238	HA	Sweden	2023-Jul-20	EPI_ISL_18255393	A/common guillemot/Sweden/SVA230720SZ0277/FB002472/I-2023	Swedish Veterinary Agency (SVA)	Swedish Veterinary Agency (SVA)	"Siamak,Zohari"
EPI2671696	HA	Italy	2023-Jul-07	EPI_ISL_18076031	A/common_tern/Italy/23VIR6744/2023	Istituto Zooprofilattico Sperimentale delle Venezie, EU/OIE/Reference Laboratory and FAO Reference Centre for AI and ND	Istituto Zooprofilattico Sperimentale Delle Venezie	Pastori, A.; Zecchin, B.; Fusaro, A.; Schivo, A.; Salviato, A.; Palumbo, E.; Giussani, E.; Monne, I.; Terregino, C.
EPI2671688	HA	Italy	2023-Jul-01	EPI_ISL_18076030	A/common_tern/Italy/23VIR6743/2023	Istituto Zooprofilattico Sperimentale delle Venezie, EU/OIE/Reference Laboratory and FAO Reference Centre for AI and ND	Istituto Zooprofilattico Sperimentale Delle Venezie	Pastori, A.; Zecchin, B.; Fusaro, A.; Schivo, A.; Salviato, A.; Palumbo, E.; Giussani, E.; Monne, I.; Terregino, C.
EPI2671680	HA	Italy	2023-Jun-20	EPI_ISL_18076029	A/common_tern/Italy/23VIR6435-2/2023	Istituto Zooprofilattico Sperimentale delle Venezie, EU/OIE/Reference Laboratory and FAO Reference Centre for AI and ND	Istituto Zooprofilattico Sperimentale Delle Venezie	Pastori, A.; Zecchin, B.; Fusaro, A.; Schivo, A.; Salviato, A.; Palumbo, E.; Giussani, E.; Monne, I.; Terregino, C.
EPI2671672	HA	Italy	2023-Jun-19	EPI_ISL_18076016	A/common_tern/Italy/23VIR6412-2/2023	Istituto Zooprofilattico Sperimentale delle Venezie, EU/OIE/Reference Laboratory and FAO Reference Centre for AI and ND	Istituto Zooprofilattico Sperimentale Delle Venezie	Pastori, A.; Zecchin, B.; Fusaro, A.; Schivo, A.; Salviato, A.; Palumbo, E.; Giussani, E.; Monne, I.; Terregino, C.
EPI2671663	HA	Italy	2023-Jul-10	EPI_ISL_18076013	A/pheasant/Italy/23VIR6483-4/2023	Istituto Zooprofilattico Sperimentale delle Venezie, EU/OIE/Reference Laboratory and FAO Reference Centre for AI and ND	Istituto Zooprofilattico Sperimentale Delle Venezie	Pastori, A.; Zecchin, B.; Fusaro, A.; Schivo, A.; Salviato, A.; Palumbo, E.; Giussani, E.; Monne, I.; Terregino, C.
EPI2671655	HA	Italy	2023-Jul-10	EPI_ISL_18076012	A/pheasant/Italy/23VIR6483-3/2023	Istituto Zooprofilattico Sperimentale delle Venezie, EU/OIE/Reference Laboratory and FAO Reference Centre for AI and ND	Istituto Zooprofilattico Sperimentale Delle Venezie	Pastori, A.; Zecchin, B.; Fusaro, A.; Schivo, A.; Salviato, A.; Palumbo, E.; Giussani, E.; Monne, I.; Terregino, C.
EPI2671647	HA	Italy	2023-Jul-03	EPI_ISL_18076011	A/common_tern/Italy/23VIR6437-3/2023	Istituto Zooprofilattico Sperimentale delle Venezie, EU/OIE/Reference Laboratory and FAO Reference Centre for AI and ND	Istituto Zooprofilattico Sperimentale Delle Venezie	Pastori, A.; Zecchin, B.; Fusaro, A.; Schivo, A.; Salviato, A.; Palumbo, E.; Giussani, E.; Monne, I.; Terregino, C.
EPI2671638	HA	Italy	2023-Jun-22	EPI_ISL_18076010	A/seagull/Italy/23VIR6182-3/2023	Istituto Zooprofilattico Sperimentale delle Venezie, EU/OIE/Reference Laboratory and FAO Reference Centre for AI and ND	Istituto Zooprofilattico Sperimentale Delle Venezie	Pastori, A.; Zecchin, B.; Fusaro, A.; Schivo, A.; Salviato, A.; Palumbo, E.; Giussani, E.; Monne, I.; Terregino, C.
EPI2671630	HA	Italy	2023-Jun-24	EPI_ISL_18076009	A/seagull/Italy/23VIR6095/2023	Istituto Zooprofilattico Sperimentale delle Venezie, EU/OIE/Reference Laboratory and FAO Reference Centre for AI and ND	Istituto Zooprofilattico Sperimentale Delle Venezie	Pastori, A.; Zecchin, B.; Fusaro, A.; Schivo, A.; Salviato, A.; Palumbo, E.; Giussani, E.; Monne, I.; Terregino, C.
EPI2671622	HA	Italy	2023-Jun-25	EPI_ISL_18076008	A/sandwich_tern/Italy/23VIR6092-4/2023	Istituto Zooprofilattico Sperimentale delle Venezie, EU/OIE/Reference Laboratory and FAO Reference Centre for AI and ND	Istituto Zooprofilattico Sperimentale Delle Venezie	Pastori, A.; Zecchin, B.; Fusaro, A.; Schivo, A.; Salviato, A.; Palumbo, E.; Giussani, E.; Monne, I.; Terregino, C.
EPI2671582	HA	Spain	2022-Jun-09	EPI_ISL_18075816	A/bearded_vulture/Spain/2116-1-2022_23VIR6502-1/2022	Laboratorio Central de Veterinaria	Istituto Zooprofilattico Sperimentale Delle Venezie	Ruano,M.J.; Rocha,A.; Sanchez,A.; Aguero,M.; Pastori, A.; Zecchin, B.; Fusaro, A.; Schivo, A.; Salviato, A.; Palumbo, E.; Giussani, E.; Monne, I.; Terregino, C.
EPI2671574	HA	Spain	2023-Mar-15	EPI_ISL_18075770	A/eagle_owl/Spain/1607-3-2023_23VIR6502-10/2023	Laboratorio Central de Veterinaria	Istituto Zooprofilattico Sperimentale Delle Venezie	Ruano,M.J.; Rocha,A.; Sanchez,A.; Aguero,M.; Pastori, A.; Zecchin, B.; Fusaro, A.; Schivo, A.; Salviato, A.; Palumbo, E.; Giussani, E.; Monne, I.; Terregino, C.
EPI2671502	HA	Spain	2023-Jun-19	EPI_ISL_18075725	A/sandwich_tern/Spain/2988-6-2023_23VIR6502-36/2023	Laboratorio Central de Veterinaria	Istituto Zooprofilattico Sperimentale Delle Venezie	Ruano,M.J.; Rocha,A.; Sanchez,A.; Aguero,M.; Pastori, A.; Zecchin, B.; Fusaro, A.; Schivo, A.; Salviato, A.; Palumbo, E.; Giussani, E.; Monne, I.; Terregino, C.
EPI2671487	HA	Spain	2023-Jun-21	EPI_ISL_18075723	A/common_tern/Spain/2903-11-2023_23VIR6502-33/2023	Laboratorio Central de Veterinaria	Istituto Zooprofilattico Sperimentale Delle Venezie	Ruano,M.J.; Rocha,A.; Sanchez,A.; Aguero,M.; Pastori, A.; Zecchin, B.; Fusaro, A.; Schivo, A.; Salviato, A.; Palumbo, E.; Giussani, E.; Monne, I.; Terregino, C.
EPI2671448	HA	Spain	2023-Jun-08	EPI_ISL_18075718	A/common_tern/Spain/2774-12-2023_23VIR6502-25/2023	Laboratorio Central de Veterinaria	Istituto Zooprofilattico Sperimentale Delle Venezie	Ruano,M.J.; Rocha,A.; Sanchez,A.; Aguero,M.; Pastori, A.; Zecchin, B.; Fusaro, A.; Schivo, A.; Salviato, A.; Palumbo, E.; Giussani, E.; Monne, I.; Terregino, C.
EPI2671440	HA	Spain	2023-Jun-07	EPI_ISL_18075717	A/gull-billed_tern/Spain/2740-28-2023_23VIR6502-24/2023	Laboratorio Central de Veterinaria	Istituto Zooprofilattico Sperimentale Delle Venezie	Ruano,M.J.; Rocha,A.; Sanchez,A.; Aguero,M.; Pastori, A.; Zecchin, B.; Fusaro, A.; Schivo, A.; Salviato, A.; Palumbo, E.; Giussani, E.; Monne, I.; Terregino, C.
EPI2671432	HA	Spain	2023-Jun-07	EPI_ISL_18075716	A/sandwich_tern/Spain/2740-23-2023_23VIR6502-23/2023	Laboratorio Central de Veterinaria	Istituto Zooprofilattico Sperimentale Delle Venezie	Ruano,M.J.; Rocha,A.; Sanchez,A.; Aguero,M.; Pastori, A.; Zecchin, B.; Fusaro, A.; Schivo, A.; Salviato, A.; Palumbo, E.; Giussani, E.; Monne, I.; Terregino, C.
EPI2671416	HA	Spain	2023-Jun-05	EPI_ISL_18075714	A/common_tern/Spain/2713-24-2023_23VIR6502-21/2023	Laboratorio Central de Veterinaria	Istituto Zooprofilattico Sperimentale Delle Venezie	Ruano,M.J.; Rocha,A.; Sanchez,A.; Aguero,M.; Pastori, A.; Zecchin, B.; Fusaro, A.; Schivo, A.; Salviato, A.; Palumbo, E.; Giussani, E.; Monne, I.; Terregino, C.
EPI2671408	HA	Spain	2023-Jun-05	EPI_ISL_18075713	A/common_tern/Spain/2713-21-2023_23VIR6502-20/2023	Laboratorio Central de Veterinaria	Istituto Zooprofilattico Sperimentale Delle Venezie	Ruano,M.J.; Rocha,A.; Sanchez,A.; Aguero,M.; Pastori, A.; Zecchin, B.; Fusaro, A.; Schivo, A.; Salviato, A.; Palumbo, E.; Giussani, E.; Monne, I.; Terregino, C.
EPI2671400	HA	Spain	2023-Jun-02	EPI_ISL_18075712	A/sandwich_tern/Spain/2681-31-2023_23VIR6502-19/2023	Laboratorio Central de Veterinaria	Istituto Zooprofilattico Sperimentale Delle Venezie	Ruano,M.J.; Rocha,A.; Sanchez,A.; Aguero,M.; Pastori, A.; Zecchin, B.; Fusaro, A.; Schivo, A.; Salviato, A.; Palumbo, E.; Giussani, E.; Monne, I.; Terregino, C.
EPI2671392	HA	Spain	2023-Jun-02	EPI_ISL_18075711	A/gull-billed_tern/Spain/2681-23-2023_23VIR6502-18/2023	Laboratorio Central de Veterinaria	Istituto Zooprofilattico Sperimentale Delle Venezie	Ruano,M.J.; Rocha,A.; Sanchez,A.; Aguero,M.; Pastori, A.; Zecchin, B.; Fusaro, A.; Schivo, A.; Salviato, A.; Palumbo, E.; Giussani, E.; Monne, I.; Terregino, C.
EPI2671384	HA	Spain	2023-Jun-02	EPI_ISL_18075710	A/gull-billed_tern/Spain/2681-21-2023_23VIR6502-17/2023	Laboratorio Central de Veterinaria	Istituto Zooprofilattico Sperimentale Delle Venezie	Ruano,M.J.; Rocha,A.; Sanchez,A.; Aguero,M.; Pastori, A.; Zecchin, B.; Fusaro, A.; Schivo, A.; Salviato, A.; Palumbo, E.; Giussani, E.; Monne, I.; Terregino, C.
EPI2671376	HA	Spain	2023-Jun-02	EPI_ISL_18075709	A/sandwich_tern/Spain/2681-18-2023_23VIR6502-16/2023	Laboratorio Central de Veterinaria	Istituto Zooprofilattico Sperimentale Delle Venezie	Ruano,M.J.; Rocha,A.; Sanchez,A.; Aguero,M.; Pastori, A.; Zecchin, B.; Fusaro, A.; Schivo, A.; Salviato, A.; Palumbo, E.; Giussani, E.; Monne, I.; Terregino, C.
EPI2671360	HA	Spain	2023-May-20	EPI_ISL_18075707	A/gull-billed_tern/Spain/2645-12-2023_23VIR6502-14/2023	Laboratorio Central de Veterinaria	Istituto Zooprofilattico Sperimentale Delle Venezie	Ruano,M.J.; Rocha,A.; Sanchez,A.; Aguero,M.; Pastori, A.; Zecchin, B.; Fusaro, A.; Schivo, A.; Salviato, A.; Palumbo, E.; Giussani, E.; Monne, I.; Terregino, C.
EPI2653527	HA	Slovenia	2023-Feb-21	EPI_ISL_18042391	A/laying_hen/Slovenia/251_23VIR1977-15/2023	University of Ljubljana	Istituto Zooprofilattico Sperimentale Delle Venezie	Slavec, B.; Kvapil, P.; Paller, T.; Pastori, A.; Zecchin, B.; Fusaro, A.; Schivo, A.; Salviato, A.; Palumbo, E.; Giussani, E.; Monne, I.; Terregino, C.
EPI2653495	HA	Slovenia	2023-Feb-06	EPI_ISL_18042387	A/grey_heron/Slovenia/163_23VIR1977-7/2023	University of Ljubljana	Istituto Zooprofilattico Sperimentale Delle Venezie	Slavec, B.; Kvapil, P.; Paller, T.; Pastori, A.; Zecchin, B.; Fusaro, A.; Schivo, A.; Salviato, A.; Palumbo, E.; Giussani, E.; Monne, I.; Terregino, C.
EPI2639891	HA	United Kingdom	2023-Jun-02	EPI_ISL_18010500	A/Black-Headed_Gull/England/078990/2023	Animal and Plant Health Agency (APHA)	Animal and Plant Health Agency (APHA)
EPI2639883	HA	United Kingdom	2023-Jun-06	EPI_ISL_18010499	A/Common_Tern/England/401301/2023	Animal and Plant Health Agency (APHA)	Animal and Plant Health Agency (APHA)
EPI2639875	HA	United Kingdom	2023-Jun-06	EPI_ISL_18010498	A/Common_Tern/England/401299/2023	Animal and Plant Health Agency (APHA)	Animal and Plant Health Agency (APHA)
EPI2639867	HA	United Kingdom	2023-Jun-13	EPI_ISL_18010497	A/Black-Headed_Gull/England/126654/2023	Animal and Plant Health Agency (APHA)	Animal and Plant Health Agency (APHA)
EPI2639859	HA	United Kingdom	2023-Jun-07	EPI_ISL_18010496	A/Herring_Gull/England/260576/2023	Animal and Plant Health Agency (APHA)	Animal and Plant Health Agency (APHA)
EPI2639851	HA	United Kingdom	2023-Jun-07	EPI_ISL_18010495	A/Common_Tern/England/260528/2023	Animal and Plant Health Agency (APHA)	Animal and Plant Health Agency (APHA)
EPI2639835	HA	United Kingdom	2023-Jun-02	EPI_ISL_18010493	A/Peregrine_Falcon/England/260452/2023	Animal and Plant Health Agency (APHA)	Animal and Plant Health Agency (APHA)
EPI2639827	HA	United Kingdom	2023-Jun-02	EPI_ISL_18010492	A/Sandwich_Tern/England/260450/2023	Animal and Plant Health Agency (APHA)	Animal and Plant Health Agency (APHA)
EPI2639803	HA	United Kingdom	2023-Jun-02	EPI_ISL_18010489	A/Black-Headed_Gull/England/260445/2023	Animal and Plant Health Agency (APHA)	Animal and Plant Health Agency (APHA)
EPI2639787	HA	United Kingdom	2023-Jun-05	EPI_ISL_18010487	A/Herring_Gull/England/328375/2023	Animal and Plant Health Agency (APHA)	Animal and Plant Health Agency (APHA)
EPI2639779	HA	United Kingdom	2023-Jun-05	EPI_ISL_18010407	A/Black-Headed_Gull/England/328362/2023	Animal and Plant Health Agency (APHA)	Animal and Plant Health Agency (APHA)
EPI2576654	HA	Austria	2023-Apr-12	EPI_ISL_17716088	A/goshawk/Austria/23048718-001/2023	Austrian Agency for Health and Food Safety (AGES)	Austrian Agency for Health and Food Safety (AGES)
EPI2576638	HA	Austria	2023-Feb-28	EPI_ISL_17716086	A/heron/Austria/23025431-001/2023	Austrian Agency for Health and Food Safety (AGES)	Austrian Agency for Health and Food Safety (AGES)
EPI2540216	HA	Belgium	2023-Mar-17	EPI_ISL_17600359	A/Pavo_cristatus/Belgium/02559_0001/2023	Sciensano - Animal Infectious Diseases	Sciensano, Department of Animal Infectious Diseases	Van Borm, Steven; Roupie, Virginie; Hostyn, Pierre; Mathijs, Elisabeth; Lambrecht, Benedicte; Steensels, Mieke
EPI2310468	HA	Sweden	2022-Dec-27	EPI_ISL_16633464	A/grey heron/Sweden/SVA230110SZ0345/FB000081/M-2022	Swedish Veterinary Agency (SVA)	Swedish Veterinary Agency (SVA)	'Siamak,Zohari'
EPI2218226	HA	Belgium	2022-Oct-24	EPI_ISL_15813940	A/mixed_domestic_Anatidae/Belgium/12318_0001/2022	Sciensano - Animal Infectious Diseases	Sciensano, Department of Animal Infectious Diseases	Van Borm, Steven; Roupie, Virginie; Lambrecht, Benedicte; Steensels, Mieke
EPI2214953	HA	Sweden	2022-Oct-26	EPI_ISL_15798083	A/common buzzard/Sweden/SVA221102SZ0478/FB004505/M-2022	Swedish Veterinary Agency (SVA)	Swedish Veterinary Agency (SVA)
EPI2158728	HA	United Kingdom	2022-Feb-01	EPI_ISL_14864652	A/long-tailed_skua/Scotland/22/2022	Animal and Plant Health Agency (APHA)	Animal and Plant Health Agency (APHA)
EPI2158696	HA	United Kingdom	2022-Aug-18	EPI_ISL_14864648	A/gull/England/107384/2022	Animal and Plant Health Agency (APHA)	Animal and Plant Health Agency (APHA)
EPI2158600	HA	United Kingdom	2022-Jun-13	EPI_ISL_14864636	A/herring_gull/England/248639/2022	Animal and Plant Health Agency (APHA)	Animal and Plant Health Agency (APHA)
EPI2158592	HA	United Kingdom	2022-Jul-01	EPI_ISL_14864635	A/black-headed_gull/England/093296/2022	Animal and Plant Health Agency (APHA)	Animal and Plant Health Agency (APHA)
EPI2089038	HA	United Kingdom	2022-Jan-08	EPI_ISL_13782461	A/pink_footed_goose/Scotland/003617/2022	Animal and Plant Health Agency (APHA)	Animal and Plant Health Agency (APHA)
EPI2089030	HA	United Kingdom	2022-Jun-21	EPI_ISL_13782460	A/Herring_Gull/England/089636/2022	Animal and Plant Health Agency (APHA)	Animal and Plant Health Agency (APHA)
EPI2028710	HA	Greece	2022-Mar-10	EPI_ISL_12471663	A/pelican/Greece/64_TR_22VIR3126-9/2022	Thessalonica Veterinary Centre (TVC)	Istituto Zooprofilattico Sperimentale delle Venezie	Georgiades, G.; Ragias, B.; Gkolia, A.; Anthopoulou, E.; Barbierato, G.; Zecchin, B.; Fusaro, A.; Schivo, A.; Salviato, A.; Palumbo, E.; Giussani, E.; Monne, I.; Terregino, C.
EPI2028702	HA	Greece	2022-Mar-10	EPI_ISL_12471662	A/pelican/Greece/64_LI_22VIR3126-8/2022	Thessalonica Veterinary Centre (TVC)	Istituto Zooprofilattico Sperimentale delle Venezie	Georgiades, G.; Ragias, B.; Gkolia, A.; Anthopoulou, E.; Barbierato, G.; Zecchin, B.; Fusaro, A.; Schivo, A.; Salviato, A.; Palumbo, E.; Giussani, E.; Monne, I.; Terregino, C.
EPI2028661	HA	Greece	2022-Mar-15	EPI_ISL_12471657	A/pelican/Greece/72_CL_22VIR3126-11/2022	Thessalonica Veterinary Centre (TVC)	Istituto Zooprofilattico Sperimentale delle Venezie	Georgiades, G.; Ragias, B.; Gkolia, A.; Anthopoulou, E.; Barbierato, G.; Zecchin, B.; Fusaro, A.; Schivo, A.; Salviato, A.; Palumbo, E.; Giussani, E.; Monne, I.; Terregino, C.
EPI2028653	HA	Greece	2022-Mar-12	EPI_ISL_12471656	A/pelican/Greece/69_CL_22VIR3126-10/2022	Thessalonica Veterinary Centre (TVC)	Istituto Zooprofilattico Sperimentale delle Venezie	Georgiades, G.; Ragias, B.; Gkolia, A.; Anthopoulou, E.; Barbierato, G.; Zecchin, B.; Fusaro, A.; Schivo, A.; Salviato, A.; Palumbo, E.; Giussani, E.; Monne, I.; Terregino, C.
EPI2028645	HA	Greece	2022-Feb-24	EPI_ISL_12471655	A/pelican/Greece/41-TR-313_22VIR3126-1/2022	Thessalonica Veterinary Centre (TVC)	Istituto Zooprofilattico Sperimentale delle Venezie	Georgiades, G.; Ragias, B.; Gkolia, A.; Anthopoulou, E.; Barbierato, G.; Zecchin, B.; Fusaro, A.; Schivo, A.; Salviato, A.; Palumbo, E.; Giussani, E.; Monne, I.; Terregino, C.
EPI2021959	HA	Albania	2022-Mar-01	EPI_ISL_12176837	A/pelecanus_crispus/Albania/D383-22_22VIR3125-2/2022	Institute of Public Health	Istituto Zooprofilattico Sperimentale delle Venezie	Lika, A.; Boci, J.; Shkodra, E.; Barbierato, G.; Zecchin, B.; Fusaro, A.; Schivo, A.; Salviato, A.; Palumbo, E.; Giussani, E.; Monne, I.; Terregino, C.
EPI1998430	HA	Ireland	2021-Dec-22	EPI_ISL_11260218	A/mute_swan/Ireland/037311_22VIR1325-13/2021	Central Veterinary Research Laboratory	Istituto Zooprofilattico Sperimentale delle Venezie	Byrne, C.; Garcia, K.; Cuartero, L.G.; Barbierato, G.; Zecchin, B.; Fusaro, A.; Schivo, A.; Salviato, A.; Palumbo, E.; Giussani, E.; Monne, I.; Terregino, C.
EPI1998186	HA	Spain	2022-Feb-10	EPI_ISL_11259289	A/gray_heron/Spain/602-1_22VIR2142-17/2022	Laboratorio Central de Veterinaria	Istituto Zooprofilattico Sperimentale delle Venezie	Ruano, M.J.; Rocha, A.; Sanchez, A.; Aguero, M; Barbierato, G.; Zecchin, B.; Fusaro, A.; Schivo, A.; Salviato, A.; Palumbo, E.; Giussani, E.; Monne, I.; Terregino, C.
EPI1998178	HA	Spain	2022-Feb-14	EPI_ISL_11259288	A/common_crane/Spain/597-2_22VIR2142-15/2022	Laboratorio Central de Veterinaria	Istituto Zooprofilattico Sperimentale delle Venezie	Ruano, M.J.; Rocha, A.; Sanchez, A.; Aguero, M; Barbierato, G.; Zecchin, B.; Fusaro, A.; Schivo, A.; Salviato, A.; Palumbo, E.; Giussani, E.; Monne, I.; Terregino, C.
EPI1998170	HA	Spain	2022-Feb-03	EPI_ISL_11259287	A/stork/Spain/538-2_22VIR2142-14/2022	Laboratorio Central de Veterinaria	Istituto Zooprofilattico Sperimentale delle Venezie	Ruano, M.J.; Rocha, A.; Sanchez, A.; Aguero, M; Barbierato, G.; Zecchin, B.; Fusaro, A.; Schivo, A.; Salviato, A.; Palumbo, E.; Giussani, E.; Monne, I.; Terregino, C.
EPI1998154	HA	Spain	2022-Feb-03	EPI_ISL_11259285	A/stork/Spain/442-8_22VIR2142-12/2022	Laboratorio Central de Veterinaria	Istituto Zooprofilattico Sperimentale delle Venezie	Ruano, M.J.; Rocha, A.; Sanchez, A.; Aguero, M; Barbierato, G.; Zecchin, B.; Fusaro, A.; Schivo, A.; Salviato, A.; Palumbo, E.; Giussani, E.; Monne, I.; Terregino, C.
EPI1998130	HA	Ireland	2021-Nov-16	EPI_ISL_11259282	A/brent_goose/Ireland/033257_22VIR1325-9/2021	Central Veterinary Research Laboratory	Istituto Zooprofilattico Sperimentale delle Venezie	Byrne, C.; Garcia, K.; Cuartero, L.G.; Barbierato, G.; Zecchin, B.; Fusaro, A.; Schivo, A.; Salviato, A.; Palumbo, E.; Giussani, E.; Monne, I.; Terregino, C.
EPI1998122	HA	Ireland	2021-Nov-15	EPI_ISL_11259281	A/white-fronted_goose/Ireland/033181_22VIR1325-8/2021	Central Veterinary Research Laboratory	Istituto Zooprofilattico Sperimentale delle Venezie	Byrne, C.; Garcia, K.; Cuartero, L.G.; Barbierato, G.; Zecchin, B.; Fusaro, A.; Schivo, A.; Salviato, A.; Palumbo, E.; Giussani, E.; Monne, I.; Terregino, C.
EPI1998114	HA	Ireland	2021-Nov-15	EPI_ISL_11259280	A/greylag_goose/Ireland/033062_22VIR1325-7/2021	Central Veterinary Research Laboratory	Istituto Zooprofilattico Sperimentale delle Venezie	Byrne, C.; Garcia, K.; Cuartero, L.G.; Barbierato, G.; Zecchin, B.; Fusaro, A.; Schivo, A.; Salviato, A.; Palumbo, E.; Giussani, E.; Monne, I.; Terregino, C.
EPI1997977	HA	Ireland	2022-Jan-07	EPI_ISL_11259263	A/buzzard/Ireland/000656_22VIR1325-12/2022	Central Veterinary Research Laboratory	Istituto Zooprofilattico Sperimentale delle Venezie	Byrne, C.; Garcia, K.; Cuartero, L.G.; Barbierato, G.; Zecchin, B.; Fusaro, A.; Schivo, A.; Salviato, A.; Palumbo, E.; Giussani, E.; Monne, I.; Terregino, C.
EPI1997969	HA	Ireland	2021-Dec-08	EPI_ISL_11259262	A/crow/Ireland/035624_22VIR1325-11/2021	Central Veterinary Research Laboratory	Istituto Zooprofilattico Sperimentale delle Venezie	Byrne, C.; Garcia, K.; Cuartero, L.G.; Barbierato, G.; Zecchin, B.; Fusaro, A.; Schivo, A.; Salviato, A.; Palumbo, E.; Giussani, E.; Monne, I.; Terregino, C.
EPI1997961	HA	Ireland	2021-Nov-17	EPI_ISL_11259261	A/herring_gull/Ireland/033533_22VIR1325-10/2021	Central Veterinary Research Laboratory	Istituto Zooprofilattico Sperimentale delle Venezie	Byrne, C.; Garcia, K.; Cuartero, L.G.; Barbierato, G.; Zecchin, B.; Fusaro, A.; Schivo, A.; Salviato, A.; Palumbo, E.; Giussani, E.; Monne, I.; Terregino, C.
EPI2873882	HA	United States	2023-Nov-07	EPI_ISL_18699008	A/turkey/Minnesota/23-034438-002/2023	National Veterinary Services Laboratories - USDA	National Veterinary Services Laboratories - USDA	Franzen,Kerrie;Love,Emily;Ozella,Mikaela;Killian,Mary;Lantz,Kristina;Stuber,Tod;Hicks,Jessica;Norris,Cameron
EPI2872855	HA	Argentina	2023-Apr-24	EPI_ISL_18698517	A/Avian/Argentina/1790-5/2023	Dirección del Laboratorio Animal, Dirección General de Laboratorios y Control Técnico, SENASA.	Instituto Nacional de Enfermedades Infecciosas Dr. C.G. Malbrán	Artuso, M.; Marchione, V.; Benedetti, E.; Chamorro, A.; Bonastre, P.; Alvarez, A.; Piccini, L.; Ponde, A.; Barrios, E.; Fabeiro, M.; Waisman, K.; Coppola, L.; Popklepovich, T.; Pontoriero, A.; Riva, D.
EPI2872847	HA	Argentina	2023-Apr-21	EPI_ISL_18698516	A/Avian/Argentina/1762-2/2023	Dirección del Laboratorio Animal, Dirección General de Laboratorios y Control Técnico, SENASA.	Instituto Nacional de Enfermedades Infecciosas Dr. C.G. Malbrán	Artuso, M.; Marchione, V.; Benedetti, E.; Chamorro, A.; Bonastre, P.; Alvarez, A.; Piccini, L.; Ponde, A.; Barrios, E.; Fabeiro, M.; Waisman, K.; Coppola, L.; Popklepovich, T.; Pontoriero, A.; Riva, D.
EPI2872650	HA	Argentina	2023-Feb-24	EPI_ISL_18698487	A/Avian/Argentina/586-4/2023	Dirección del Laboratorio Animal, Dirección General de Laboratorios y Control Técnico, SENASA.	Instituto Nacional de Enfermedades Infecciosas Dr. C.G. Malbrán	Artuso, M.; Marchione, V.; Benedetti, E.; Chamorro, A.; Bonastre, P.; Alvarez, A.; Piccini, L.; Ponde, A.; Barrios, E.; Fabeiro, M.; Waisman, K.; Coppola, L.; Popklepovich, T.; Pontoriero, A.; Riva, D.
EPI2872636	HA	Argentina	2023-Feb-24	EPI_ISL_18698485	A/Avian/Argentina/579-5/2023	Dirección del Laboratorio Animal, Dirección General de Laboratorios y Control Técnico, SENASA.	Instituto Nacional de Enfermedades Infecciosas Dr. C.G. Malbrán	Artuso, M.; Marchione, V.; Benedetti, E.; Chamorro, A.; Bonastre, P.; Alvarez, A.; Piccini, L.; Ponde, A.; Barrios, E.; Fabeiro, M.; Waisman, K.; Coppola, L.; Popklepovich, T.; Pontoriero, A.; Riva, D.
EPI2870370	HA	United States	2022-Jan-01	EPI_ISL_18697750	A/black vulture/Georgia/23-032683-002/2022	National Veterinary Services Laboratories - USDA	National Veterinary Services Laboratories - USDA	Franzen,Kerrie;Love,Emily;Ozella,Mikaela;Killian,Mary;Lantz,Kristina;Stuber,Tod;Hicks,Jessica;Norris,Cameron
EPI2870362	HA	United States	2022-Jan-01	EPI_ISL_18697749	A/Muscovy duck/Georgia/23-032683-001/2022	National Veterinary Services Laboratories - USDA	National Veterinary Services Laboratories - USDA	Franzen,Kerrie;Love,Emily;Ozella,Mikaela;Killian,Mary;Lantz,Kristina;Stuber,Tod;Hicks,Jessica;Norris,Cameron
EPI2870354	HA	United States	2023-Oct-24	EPI_ISL_18697748	A/swan/Oklahoma/23-032455-001/2023	National Veterinary Services Laboratories - USDA	National Veterinary Services Laboratories - USDA	Franzen,Kerrie;Love,Emily;Ozella,Mikaela;Killian,Mary;Lantz,Kristina;Stuber,Tod;Hicks,Jessica;Norris,Cameron
EPI2870346	HA	United States	2023-Oct-17	EPI_ISL_18697747	A/peregrine falcon/Texas/23-032452-001/2023	National Veterinary Services Laboratories - USDA	National Veterinary Services Laboratories - USDA	Franzen,Kerrie;Love,Emily;Ozella,Mikaela;Killian,Mary;Lantz,Kristina;Stuber,Tod;Hicks,Jessica;Norris,Cameron
EPI2870338	HA	United States	2023-Oct-23	EPI_ISL_18697746	A/chicken/Minnesota/23-032411-001/2023	National Veterinary Services Laboratories - USDA	National Veterinary Services Laboratories - USDA	Franzen,Kerrie;Love,Emily;Ozella,Mikaela;Killian,Mary;Lantz,Kristina;Stuber,Tod;Hicks,Jessica;Norris,Cameron
EPI2870330	HA	United States	2023-Oct-23	EPI_ISL_18697745	A/turkey/Minnesota/23-032410-002/2023	National Veterinary Services Laboratories - USDA	National Veterinary Services Laboratories - USDA	Franzen,Kerrie;Love,Emily;Ozella,Mikaela;Killian,Mary;Lantz,Kristina;Stuber,Tod;Hicks,Jessica;Norris,Cameron
EPI2870322	HA	United States	2023-Oct-23	EPI_ISL_18697744	A/turkey/Minnesota/23-032410-001/2023	National Veterinary Services Laboratories - USDA	National Veterinary Services Laboratories - USDA	Franzen,Kerrie;Love,Emily;Ozella,Mikaela;Killian,Mary;Lantz,Kristina;Stuber,Tod;Hicks,Jessica;Norris,Cameron
EPI2870314	HA	United States	2023-Oct-24	EPI_ISL_18697743	A/turkey/South Dakota/23-032362-002/2023	National Veterinary Services Laboratories - USDA	National Veterinary Services Laboratories - USDA	Franzen,Kerrie;Love,Emily;Ozella,Mikaela;Killian,Mary;Lantz,Kristina;Stuber,Tod;Hicks,Jessica;Norris,Cameron
EPI2870306	HA	United States	2023-Oct-24	EPI_ISL_18697742	A/turkey/South Dakota/23-032362-001/2023	National Veterinary Services Laboratories - USDA	National Veterinary Services Laboratories - USDA	Franzen,Kerrie;Love,Emily;Ozella,Mikaela;Killian,Mary;Lantz,Kristina;Stuber,Tod;Hicks,Jessica;Norris,Cameron
EPI2870298	HA	United States	2023-Oct-23	EPI_ISL_18697741	A/turkey/South Dakota/23-032360-002/2023	National Veterinary Services Laboratories - USDA	National Veterinary Services Laboratories - USDA	Franzen,Kerrie;Love,Emily;Ozella,Mikaela;Killian,Mary;Lantz,Kristina;Stuber,Tod;Hicks,Jessica;Norris,Cameron
EPI2870290	HA	United States	2023-Oct-23	EPI_ISL_18697740	A/turkey/South Dakota/23-032360-001/2023	National Veterinary Services Laboratories - USDA	National Veterinary Services Laboratories - USDA	Franzen,Kerrie;Love,Emily;Ozella,Mikaela;Killian,Mary;Lantz,Kristina;Stuber,Tod;Hicks,Jessica;Norris,Cameron
EPI2870282	HA	United States	2023-Oct-22	EPI_ISL_18697739	A/turkey/South Dakota/23-032354-002/2023	National Veterinary Services Laboratories - USDA	National Veterinary Services Laboratories - USDA	Franzen,Kerrie;Love,Emily;Ozella,Mikaela;Killian,Mary;Lantz,Kristina;Stuber,Tod;Hicks,Jessica;Norris,Cameron
EPI2870274	HA	United States	2023-Oct-22	EPI_ISL_18697738	A/turkey/South Dakota/23-032354-001/2023	National Veterinary Services Laboratories - USDA	National Veterinary Services Laboratories - USDA	Franzen,Kerrie;Love,Emily;Ozella,Mikaela;Killian,Mary;Lantz,Kristina;Stuber,Tod;Hicks,Jessica;Norris,Cameron
EPI2870266	HA	United States	2023-Oct-20	EPI_ISL_18697737	A/chicken/Oregon/23-032327-001/2023	National Veterinary Services Laboratories - USDA	National Veterinary Services Laboratories - USDA	Franzen,Kerrie;Love,Emily;Ozella,Mikaela;Killian,Mary;Lantz,Kristina;Stuber,Tod;Hicks,Jessica;Norris,Cameron
EPI2870258	HA	United States	2023-Oct-20	EPI_ISL_18697736	A/guinea fowl/Minnesota/23-032247-002/2023	National Veterinary Services Laboratories - USDA	National Veterinary Services Laboratories - USDA	Franzen,Kerrie;Love,Emily;Ozella,Mikaela;Killian,Mary;Lantz,Kristina;Stuber,Tod;Hicks,Jessica;Norris,Cameron
EPI2870250	HA	United States	2023-Oct-20	EPI_ISL_18697735	A/chicken/Minnesota/23-032247-001/2023	National Veterinary Services Laboratories - USDA	National Veterinary Services Laboratories - USDA	Franzen,Kerrie;Love,Emily;Ozella,Mikaela;Killian,Mary;Lantz,Kristina;Stuber,Tod;Hicks,Jessica;Norris,Cameron
EPI2870242	HA	United States	2023-Oct-19	EPI_ISL_18697734	A/turkey/Minnesota/23-032152-002/2023	National Veterinary Services Laboratories - USDA	National Veterinary Services Laboratories - USDA	Franzen,Kerrie;Love,Emily;Ozella,Mikaela;Killian,Mary;Lantz,Kristina;Stuber,Tod;Hicks,Jessica;Norris,Cameron
EPI2870234	HA	United States	2023-Oct-19	EPI_ISL_18697733	A/turkey/Minnesota/23-032152-001/2023	National Veterinary Services Laboratories - USDA	National Veterinary Services Laboratories - USDA	Franzen,Kerrie;Love,Emily;Ozella,Mikaela;Killian,Mary;Lantz,Kristina;Stuber,Tod;Hicks,Jessica;Norris,Cameron
EPI2870226	HA	United States	2023-Oct-18	EPI_ISL_18697732	A/turkey/Minnesota/23-032151-002/2023	National Veterinary Services Laboratories - USDA	National Veterinary Services Laboratories - USDA	Franzen,Kerrie;Love,Emily;Ozella,Mikaela;Killian,Mary;Lantz,Kristina;Stuber,Tod;Hicks,Jessica;Norris,Cameron
EPI2870218	HA	United States	2023-Oct-18	EPI_ISL_18697731	A/turkey/Minnesota/23-032151-001/2023	National Veterinary Services Laboratories - USDA	National Veterinary Services Laboratories - USDA	Franzen,Kerrie;Love,Emily;Ozella,Mikaela;Killian,Mary;Lantz,Kristina;Stuber,Tod;Hicks,Jessica;Norris,Cameron
EPI2870210	HA	United States	2023-Oct-19	EPI_ISL_18697730	A/turkey/Minnesota/23-032150-002/2023	National Veterinary Services Laboratories - USDA	National Veterinary Services Laboratories - USDA	Franzen,Kerrie;Love,Emily;Ozella,Mikaela;Killian,Mary;Lantz,Kristina;Stuber,Tod;Hicks,Jessica;Norris,Cameron
EPI2870202	HA	United States	2023-Oct-19	EPI_ISL_18697729	A/turkey/Minnesota/23-032150-001/2023	National Veterinary Services Laboratories - USDA	National Veterinary Services Laboratories - USDA	Franzen,Kerrie;Love,Emily;Ozella,Mikaela;Killian,Mary;Lantz,Kristina;Stuber,Tod;Hicks,Jessica;Norris,Cameron
EPI2870194	HA	United States	2023-Oct-18	EPI_ISL_18697728	A/turkey/Minnesota/23-032149-001/2023	National Veterinary Services Laboratories - USDA	National Veterinary Services Laboratories - USDA	Franzen,Kerrie;Love,Emily;Ozella,Mikaela;Killian,Mary;Lantz,Kristina;Stuber,Tod;Hicks,Jessica;Norris,Cameron
EPI2857405	HA	Canada	2023-Nov-27	EPI_ISL_18665689	A/Red_Tailed_Hawk/BC/AIVPHL-1450/2023	B.C. Centre for Disease Control	Public Health Agency of Canada	Himsworth, Chelsea; Prystajecky,Natalie; Tyson,John; Jassem,Agatha; Kuchinski,Kevin; Coombe, Michelle; Lee,Tracy; Azana,Rob; Fung,Janet; Chan,Michael; Cheung,Branco; Caleta,Jessica; Tsang,Frankie; Yang,Kevin; Russell,Shannon; Zlosnik,James; Hoang,Linda
EPI2857340	HA	Canada	2023-Nov-27	EPI_ISL_18665680	A/Canada_Goose/BC/AIVPHL-1448/2023	B.C. Centre for Disease Control	Public Health Agency of Canada	Himsworth, Chelsea; Prystajecky,Natalie; Tyson,John; Jassem,Agatha; Kuchinski,Kevin; Coombe, Michelle; Lee,Tracy; Azana,Rob; Fung,Janet; Chan,Michael; Cheung,Branco; Caleta,Jessica; Tsang,Frankie; Yang,Kevin; Russell,Shannon; Zlosnik,James; Hoang,Linda
EPI2857189	HA	Canada	2023-Nov-27	EPI_ISL_18665661	A/Red_Tailed_Hawk/BC/AIVPHL-1444/2023	B.C. Centre for Disease Control	Public Health Agency of Canada	Himsworth, Chelsea; Prystajecky,Natalie; Tyson,John; Jassem,Agatha; Kuchinski,Kevin; Coombe, Michelle; Lee,Tracy; Azana,Rob; Fung,Janet; Chan,Michael; Cheung,Branco; Caleta,Jessica; Tsang,Frankie; Yang,Kevin; Russell,Shannon; Zlosnik,James; Hoang,Linda
EPI2857157	HA	Canada	2023-Nov-24	EPI_ISL_18665656	A/Canada_Goose/BC/AIVPHL-1443/2023	B.C. Centre for Disease Control	Public Health Agency of Canada	Himsworth, Chelsea; Prystajecky,Natalie; Tyson,John; Jassem,Agatha; Kuchinski,Kevin; Coombe, Michelle; Lee,Tracy; Azana,Rob; Fung,Janet; Chan,Michael; Cheung,Branco; Caleta,Jessica; Tsang,Frankie; Yang,Kevin; Russell,Shannon; Zlosnik,James; Hoang,Linda
EPI2857114	HA	Canada	2023-Nov-20	EPI_ISL_18665651	A/Cackling_Goose/BC/AIVPHL-1436/2023	B.C. Centre for Disease Control	Public Health Agency of Canada	Himsworth, Chelsea; Prystajecky,Natalie; Tyson,John; Jassem,Agatha; Kuchinski,Kevin; Coombe, Michelle; Lee,Tracy; Azana,Rob; Fung,Janet; Chan,Michael; Cheung,Branco; Caleta,Jessica; Tsang,Frankie; Yang,Kevin; Russell,Shannon; Zlosnik,James; Hoang,Linda
EPI2857065	HA	Canada	2023-Nov-20	EPI_ISL_18665644	A/Cackling_Goose/BC/AIVPHL-1427/2023	B.C. Centre for Disease Control	Public Health Agency of Canada	Himsworth, Chelsea; Prystajecky,Natalie; Tyson,John; Jassem,Agatha; Kuchinski,Kevin; Coombe, Michelle; Lee,Tracy; Azana,Rob; Fung,Janet; Chan,Michael; Cheung,Branco; Caleta,Jessica; Tsang,Frankie; Yang,Kevin; Russell,Shannon; Zlosnik,James; Hoang,Linda
EPI2857040	HA	Canada	2023-Nov-20	EPI_ISL_18665641	A/Glaucous_Winged_Gull/BC/AIVPHL-1426/2023	B.C. Centre for Disease Control	Public Health Agency of Canada	Himsworth, Chelsea; Prystajecky,Natalie; Tyson,John; Jassem,Agatha; Kuchinski,Kevin; Coombe, Michelle; Lee,Tracy; Azana,Rob; Fung,Janet; Chan,Michael; Cheung,Branco; Caleta,Jessica; Tsang,Frankie; Yang,Kevin; Russell,Shannon; Zlosnik,James; Hoang,Linda
EPI2857007	HA	Canada	2023-Nov-20	EPI_ISL_18665637	A/American_Crow/BC/AIVPHL-1425/2023	B.C. Centre for Disease Control	Public Health Agency of Canada	Himsworth, Chelsea; Prystajecky,Natalie; Tyson,John; Jassem,Agatha; Kuchinski,Kevin; Coombe, Michelle; Lee,Tracy; Azana,Rob; Fung,Janet; Chan,Michael; Cheung,Branco; Caleta,Jessica; Tsang,Frankie; Yang,Kevin; Russell,Shannon; Zlosnik,James; Hoang,Linda
EPI2856974	HA	Canada	2023-Nov-20	EPI_ISL_18665633	A/American_Crow/BC/AIVPHL-1424/2023	B.C. Centre for Disease Control	Public Health Agency of Canada	Himsworth, Chelsea; Prystajecky,Natalie; Tyson,John; Jassem,Agatha; Kuchinski,Kevin; Coombe, Michelle; Lee,Tracy; Azana,Rob; Fung,Janet; Chan,Michael; Cheung,Branco; Caleta,Jessica; Tsang,Frankie; Yang,Kevin; Russell,Shannon; Zlosnik,James; Hoang,Linda
EPI2856919	HA	Canada	2023-Nov-20	EPI_ISL_18665626	A/American_Wigeon/BC/AIVPHL-1421/2023	B.C. Centre for Disease Control	Public Health Agency of Canada	Himsworth, Chelsea; Prystajecky,Natalie; Tyson,John; Jassem,Agatha; Kuchinski,Kevin; Coombe, Michelle; Lee,Tracy; Azana,Rob; Fung,Janet; Chan,Michael; Cheung,Branco; Caleta,Jessica; Tsang,Frankie; Yang,Kevin; Russell,Shannon; Zlosnik,James; Hoang,Linda
EPI2856891	HA	Canada	2023-Jul-26	EPI_ISL_18665623	A/American_Crow/BC/AIVPHL-1246/2023	B.C. Centre for Disease Control	Public Health Agency of Canada	Himsworth, Chelsea; Prystajecky,Natalie; Tyson,John; Jassem,Agatha; Kuchinski,Kevin; Coombe, Michelle; Lee,Tracy; Azana,Rob; Fung,Janet; Chan,Michael; Cheung,Branco; Caleta,Jessica; Tsang,Frankie; Yang,Kevin; Russell,Shannon; Zlosnik,James; Hoang,Linda
EPI2856886	HA	Canada	2023-Nov-20	EPI_ISL_18665621	A/American_Wigeon/BC/AIVPHL-1420/2023	B.C. Centre for Disease Control	Public Health Agency of Canada	Himsworth, Chelsea; Prystajecky,Natalie; Tyson,John; Jassem,Agatha; Kuchinski,Kevin; Coombe, Michelle; Lee,Tracy; Azana,Rob; Fung,Janet; Chan,Michael; Cheung,Branco; Caleta,Jessica; Tsang,Frankie; Yang,Kevin; Russell,Shannon; Zlosnik,James; Hoang,Linda
EPI2856859	HA	Canada	2023-Jul-24	EPI_ISL_18665619	A/Cooper_s_Hawk/BC/AIVPHL-1243/2023	B.C. Centre for Disease Control	Public Health Agency of Canada	Himsworth, Chelsea; Prystajecky,Natalie; Tyson,John; Jassem,Agatha; Kuchinski,Kevin; Coombe, Michelle; Lee,Tracy; Azana,Rob; Fung,Janet; Chan,Michael; Cheung,Branco; Caleta,Jessica; Tsang,Frankie; Yang,Kevin; Russell,Shannon; Zlosnik,James; Hoang,Linda
EPI2856854	HA	Canada	2023-Nov-20	EPI_ISL_18665617	A/Red_Tailed_Hawk/BC/AIVPHL-1419/2023	B.C. Centre for Disease Control	Public Health Agency of Canada	Himsworth, Chelsea; Prystajecky,Natalie; Tyson,John; Jassem,Agatha; Kuchinski,Kevin; Coombe, Michelle; Lee,Tracy; Azana,Rob; Fung,Janet; Chan,Michael; Cheung,Branco; Caleta,Jessica; Tsang,Frankie; Yang,Kevin; Russell,Shannon; Zlosnik,James; Hoang,Linda
EPI2856827	HA	Canada	2023-Jul-24	EPI_ISL_18665615	A/Great_Horned_Owl/BC/AIVPHL-1242/2023	B.C. Centre for Disease Control	Public Health Agency of Canada	Himsworth, Chelsea; Prystajecky,Natalie; Tyson,John; Jassem,Agatha; Kuchinski,Kevin; Coombe, Michelle; Lee,Tracy; Azana,Rob; Fung,Janet; Chan,Michael; Cheung,Branco; Caleta,Jessica; Tsang,Frankie; Yang,Kevin; Russell,Shannon; Zlosnik,James; Hoang,Linda
EPI2856821	HA	Canada	2023-Nov-20	EPI_ISL_18665613	A/Cooper_s_Hawk/BC/AIVPHL-1433/2023	B.C. Centre for Disease Control	Public Health Agency of Canada	Himsworth, Chelsea; Prystajecky,Natalie; Tyson,John; Jassem,Agatha; Kuchinski,Kevin; Coombe, Michelle; Lee,Tracy; Azana,Rob; Fung,Janet; Chan,Michael; Cheung,Branco; Caleta,Jessica; Tsang,Frankie; Yang,Kevin; Russell,Shannon; Zlosnik,James; Hoang,Linda
EPI2856795	HA	Canada	2023-Jul-24	EPI_ISL_18665611	A/Barred_Owl/BC/AIVPHL-1238/2023	B.C. Centre for Disease Control	Public Health Agency of Canada	Himsworth, Chelsea; Prystajecky,Natalie; Tyson,John; Jassem,Agatha; Kuchinski,Kevin; Coombe, Michelle; Lee,Tracy; Azana,Rob; Fung,Janet; Chan,Michael; Cheung,Branco; Caleta,Jessica; Tsang,Frankie; Yang,Kevin; Russell,Shannon; Zlosnik,James; Hoang,Linda
EPI2856789	HA	Canada	2023-Nov-20	EPI_ISL_18665608	A/Great_Blue_Heron/BC/AIVPHL-1417/2023	B.C. Centre for Disease Control	Public Health Agency of Canada	Himsworth, Chelsea; Prystajecky,Natalie; Tyson,John; Jassem,Agatha; Kuchinski,Kevin; Coombe, Michelle; Lee,Tracy; Azana,Rob; Fung,Janet; Chan,Michael; Cheung,Branco; Caleta,Jessica; Tsang,Frankie; Yang,Kevin; Russell,Shannon; Zlosnik,James; Hoang,Linda
EPI2856766	HA	Canada	2023-Jul-24	EPI_ISL_18665607	A/Red_Tailed_Hawk/BC/AIVPHL-1236/2023	B.C. Centre for Disease Control	Public Health Agency of Canada	Himsworth, Chelsea; Prystajecky,Natalie; Tyson,John; Jassem,Agatha; Kuchinski,Kevin; Coombe, Michelle; Lee,Tracy; Azana,Rob; Fung,Janet; Chan,Michael; Cheung,Branco; Caleta,Jessica; Tsang,Frankie; Yang,Kevin; Russell,Shannon; Zlosnik,James; Hoang,Linda
EPI2856763	HA	Canada	2023-Nov-16	EPI_ISL_18665605	A/Cackling_Goose/BC/AIVPHL-1413/2023	B.C. Centre for Disease Control	Public Health Agency of Canada	Himsworth, Chelsea; Prystajecky,Natalie; Tyson,John; Jassem,Agatha; Kuchinski,Kevin; Coombe, Michelle; Lee,Tracy; Azana,Rob; Fung,Janet; Chan,Michael; Cheung,Branco; Caleta,Jessica; Tsang,Frankie; Yang,Kevin; Russell,Shannon; Zlosnik,James; Hoang,Linda
EPI2856742	HA	Canada	2023-Jul-17	EPI_ISL_18665604	A/Red_Tailed_Hawk/BC/AIVPHL-1227/2023	B.C. Centre for Disease Control	Public Health Agency of Canada	Himsworth, Chelsea; Prystajecky,Natalie; Tyson,John; Jassem,Agatha; Kuchinski,Kevin; Coombe, Michelle; Lee,Tracy; Azana,Rob; Fung,Janet; Chan,Michael; Cheung,Branco; Caleta,Jessica; Tsang,Frankie; Yang,Kevin; Russell,Shannon; Zlosnik,James; Hoang,Linda
EPI2856739	HA	Canada	2023-Nov-14	EPI_ISL_18665602	A/Cackling_Goose/BC/AIVPHL-1412/2023	B.C. Centre for Disease Control	Public Health Agency of Canada	Himsworth, Chelsea; Prystajecky,Natalie; Tyson,John; Jassem,Agatha; Kuchinski,Kevin; Coombe, Michelle; Lee,Tracy; Azana,Rob; Fung,Janet; Chan,Michael; Cheung,Branco; Caleta,Jessica; Tsang,Frankie; Yang,Kevin; Russell,Shannon; Zlosnik,James; Hoang,Linda
EPI2856718	HA	Canada	2023-Jul-14	EPI_ISL_18665601	A/Dunlin/BC/AIVPHL-1221/2023	B.C. Centre for Disease Control	Public Health Agency of Canada	Himsworth, Chelsea; Prystajecky,Natalie; Tyson,John; Jassem,Agatha; Kuchinski,Kevin; Coombe, Michelle; Lee,Tracy; Azana,Rob; Fung,Janet; Chan,Michael; Cheung,Branco; Caleta,Jessica; Tsang,Frankie; Yang,Kevin; Russell,Shannon; Zlosnik,James; Hoang,Linda
EPI2856717	HA	Canada	2023-Dec-11	EPI_ISL_18665600	A/Peregrine_Falcon/BC/AIVPHL-1499/2023	B.C. Centre for Disease Control	Public Health Agency of Canada	Himsworth, Chelsea; Prystajecky,Natalie; Tyson,John; Jassem,Agatha; Kuchinski,Kevin; Coombe, Michelle; Lee,Tracy; Azana,Rob; Fung,Janet; Chan,Michael; Cheung,Branco; Caleta,Jessica; Tsang,Frankie; Yang,Kevin; Russell,Shannon; Zlosnik,James; Hoang,Linda
EPI2856715	HA	Canada	2023-Nov-14	EPI_ISL_18665599	A/American_Wigeon/BC/AIVPHL-1411/2023	B.C. Centre for Disease Control	Public Health Agency of Canada	Himsworth, Chelsea; Prystajecky,Natalie; Tyson,John; Jassem,Agatha; Kuchinski,Kevin; Coombe, Michelle; Lee,Tracy; Azana,Rob; Fung,Janet; Chan,Michael; Cheung,Branco; Caleta,Jessica; Tsang,Frankie; Yang,Kevin; Russell,Shannon; Zlosnik,James; Hoang,Linda
EPI2856693	HA	Canada	2023-Dec-11	EPI_ISL_18665597	A/Cooper_s_Hawk/BC/AIVPHL-1498/2023	B.C. Centre for Disease Control	Public Health Agency of Canada	Himsworth, Chelsea; Prystajecky,Natalie; Tyson,John; Jassem,Agatha; Kuchinski,Kevin; Coombe, Michelle; Lee,Tracy; Azana,Rob; Fung,Janet; Chan,Michael; Cheung,Branco; Caleta,Jessica; Tsang,Frankie; Yang,Kevin; Russell,Shannon; Zlosnik,James; Hoang,Linda
EPI2856691	HA	Canada	2023-Nov-14	EPI_ISL_18665596	A/American_Wigeon/BC/AIVPHL-1410/2023	B.C. Centre for Disease Control	Public Health Agency of Canada	Himsworth, Chelsea; Prystajecky,Natalie; Tyson,John; Jassem,Agatha; Kuchinski,Kevin; Coombe, Michelle; Lee,Tracy; Azana,Rob; Fung,Janet; Chan,Michael; Cheung,Branco; Caleta,Jessica; Tsang,Frankie; Yang,Kevin; Russell,Shannon; Zlosnik,James; Hoang,Linda
EPI2856671	HA	Canada	2023-May-23	EPI_ISL_18665595	A/Cooper_s_Hawk/BC/AIVPHL-1125/2023	B.C. Centre for Disease Control	Public Health Agency of Canada	Himsworth, Chelsea; Prystajecky,Natalie; Tyson,John; Jassem,Agatha; Kuchinski,Kevin; Coombe, Michelle; Lee,Tracy; Azana,Rob; Fung,Janet; Chan,Michael; Cheung,Branco; Caleta,Jessica; Tsang,Frankie; Yang,Kevin; Russell,Shannon; Zlosnik,James; Hoang,Linda
EPI2856646	HA	Canada	2023-Dec-04	EPI_ISL_18665591	A/Canada_Goose/BC/AIVPHL-1483/2023	B.C. Centre for Disease Control	Public Health Agency of Canada	Himsworth, Chelsea; Prystajecky,Natalie; Tyson,John; Jassem,Agatha; Kuchinski,Kevin; Coombe, Michelle; Lee,Tracy; Azana,Rob; Fung,Janet; Chan,Michael; Cheung,Branco; Caleta,Jessica; Tsang,Frankie; Yang,Kevin; Russell,Shannon; Zlosnik,James; Hoang,Linda
EPI2856644	HA	Canada	2023-Nov-14	EPI_ISL_18665590	A/Cackling_Goose/BC/AIVPHL-1407/2023	B.C. Centre for Disease Control	Public Health Agency of Canada	Himsworth, Chelsea; Prystajecky,Natalie; Tyson,John; Jassem,Agatha; Kuchinski,Kevin; Coombe, Michelle; Lee,Tracy; Azana,Rob; Fung,Janet; Chan,Michael; Cheung,Branco; Caleta,Jessica; Tsang,Frankie; Yang,Kevin; Russell,Shannon; Zlosnik,James; Hoang,Linda
EPI2856622	HA	Canada	2023-Nov-14	EPI_ISL_18665587	A/Cackling_Goose/BC/AIVPHL-1406/2023	B.C. Centre for Disease Control	Public Health Agency of Canada	Himsworth, Chelsea; Prystajecky,Natalie; Tyson,John; Jassem,Agatha; Kuchinski,Kevin; Coombe, Michelle; Lee,Tracy; Azana,Rob; Fung,Janet; Chan,Michael; Cheung,Branco; Caleta,Jessica; Tsang,Frankie; Yang,Kevin; Russell,Shannon; Zlosnik,James; Hoang,Linda
EPI2856607	HA	Canada	2023-Dec-01	EPI_ISL_18665586	A/American_Crow/BC/AIVPHL-1471/2023	B.C. Centre for Disease Control	Public Health Agency of Canada	Himsworth, Chelsea; Prystajecky,Natalie; Tyson,John; Jassem,Agatha; Kuchinski,Kevin; Coombe, Michelle; Lee,Tracy; Azana,Rob; Fung,Janet; Chan,Michael; Cheung,Branco; Caleta,Jessica; Tsang,Frankie; Yang,Kevin; Russell,Shannon; Zlosnik,James; Hoang,Linda
EPI2856597	HA	Canada	2023-Nov-14	EPI_ISL_18665584	A/Cackling_Goose/BC/AIVPHL-1405/2023	B.C. Centre for Disease Control	Public Health Agency of Canada	Himsworth, Chelsea; Prystajecky,Natalie; Tyson,John; Jassem,Agatha; Kuchinski,Kevin; Coombe, Michelle; Lee,Tracy; Azana,Rob; Fung,Janet; Chan,Michael; Cheung,Branco; Caleta,Jessica; Tsang,Frankie; Yang,Kevin; Russell,Shannon; Zlosnik,James; Hoang,Linda
EPI2856582	HA	Canada	2023-Dec-01	EPI_ISL_18665582	A/American_Crow/BC/AIVPHL-1469/2023	B.C. Centre for Disease Control	Public Health Agency of Canada	Himsworth, Chelsea; Prystajecky,Natalie; Tyson,John; Jassem,Agatha; Kuchinski,Kevin; Coombe, Michelle; Lee,Tracy; Azana,Rob; Fung,Janet; Chan,Michael; Cheung,Branco; Caleta,Jessica; Tsang,Frankie; Yang,Kevin; Russell,Shannon; Zlosnik,James; Hoang,Linda
EPI2856574	HA	Canada	2023-Nov-14	EPI_ISL_18665581	A/Cackling_Goose/BC/AIVPHL-1404/2023	B.C. Centre for Disease Control	Public Health Agency of Canada	Himsworth, Chelsea; Prystajecky,Natalie; Tyson,John; Jassem,Agatha; Kuchinski,Kevin; Coombe, Michelle; Lee,Tracy; Azana,Rob; Fung,Janet; Chan,Michael; Cheung,Branco; Caleta,Jessica; Tsang,Frankie; Yang,Kevin; Russell,Shannon; Zlosnik,James; Hoang,Linda
EPI2856551	HA	Canada	2023-Jan-16	EPI_ISL_18665578	A/Cooper_s_Hawk/BC/AIVPHL-893/2023	B.C. Centre for Disease Control	Public Health Agency of Canada	Himsworth, Chelsea; Prystajecky,Natalie; Tyson,John; Jassem,Agatha; Kuchinski,Kevin; Coombe, Michelle; Lee,Tracy; Azana,Rob; Fung,Janet; Chan,Michael; Cheung,Branco; Caleta,Jessica; Tsang,Frankie; Yang,Kevin; Russell,Shannon; Zlosnik,James; Hoang,Linda
EPI2856545	HA	Canada	2023-Nov-14	EPI_ISL_18665577	A/Canada_Goose/BC/AIVPHL-1403/2023	B.C. Centre for Disease Control	Public Health Agency of Canada	Himsworth, Chelsea; Prystajecky,Natalie; Tyson,John; Jassem,Agatha; Kuchinski,Kevin; Coombe, Michelle; Lee,Tracy; Azana,Rob; Fung,Janet; Chan,Michael; Cheung,Branco; Caleta,Jessica; Tsang,Frankie; Yang,Kevin; Russell,Shannon; Zlosnik,James; Hoang,Linda
EPI2856522	HA	Canada	2023-Dec-01	EPI_ISL_18665574	A/Peregrine_Falcon/BC/AIVPHL-1465/2023	B.C. Centre for Disease Control	Public Health Agency of Canada	Himsworth, Chelsea; Prystajecky,Natalie; Tyson,John; Jassem,Agatha; Kuchinski,Kevin; Coombe, Michelle; Lee,Tracy; Azana,Rob; Fung,Janet; Chan,Michael; Cheung,Branco; Caleta,Jessica; Tsang,Frankie; Yang,Kevin; Russell,Shannon; Zlosnik,James; Hoang,Linda
EPI2856513	HA	Canada	2023-Nov-14	EPI_ISL_18665573	A/Canada_Goose/BC/AIVPHL-1402/2023	B.C. Centre for Disease Control	Public Health Agency of Canada	Himsworth, Chelsea; Prystajecky,Natalie; Tyson,John; Jassem,Agatha; Kuchinski,Kevin; Coombe, Michelle; Lee,Tracy; Azana,Rob; Fung,Janet; Chan,Michael; Cheung,Branco; Caleta,Jessica; Tsang,Frankie; Yang,Kevin; Russell,Shannon; Zlosnik,James; Hoang,Linda
EPI2856496	HA	Canada	2023-Jan-09	EPI_ISL_18665571	A/Cackling_Goose/BC/AIVPHL-876/2023	B.C. Centre for Disease Control	Public Health Agency of Canada	Himsworth, Chelsea; Prystajecky,Natalie; Tyson,John; Jassem,Agatha; Kuchinski,Kevin; Coombe, Michelle; Lee,Tracy; Azana,Rob; Fung,Janet; Chan,Michael; Cheung,Branco; Caleta,Jessica; Tsang,Frankie; Yang,Kevin; Russell,Shannon; Zlosnik,James; Hoang,Linda
EPI2856491	HA	Canada	2023-Dec-01	EPI_ISL_18665570	A/Barn_Owl/BC/AIVPHL-1464/2023	B.C. Centre for Disease Control	Public Health Agency of Canada	Himsworth, Chelsea; Prystajecky,Natalie; Tyson,John; Jassem,Agatha; Kuchinski,Kevin; Coombe, Michelle; Lee,Tracy; Azana,Rob; Fung,Janet; Chan,Michael; Cheung,Branco; Caleta,Jessica; Tsang,Frankie; Yang,Kevin; Russell,Shannon; Zlosnik,James; Hoang,Linda
EPI2856481	HA	Canada	2023-Nov-14	EPI_ISL_18665569	A/Canada_Goose/BC/AIVPHL-1401/2023	B.C. Centre for Disease Control	Public Health Agency of Canada	Himsworth, Chelsea; Prystajecky,Natalie; Tyson,John; Jassem,Agatha; Kuchinski,Kevin; Coombe, Michelle; Lee,Tracy; Azana,Rob; Fung,Janet; Chan,Michael; Cheung,Branco; Caleta,Jessica; Tsang,Frankie; Yang,Kevin; Russell,Shannon; Zlosnik,James; Hoang,Linda
EPI2856469	HA	Canada	2023-Mar-27	EPI_ISL_18665567	A/Red_Tailed_Hawk/BC/AIVPHL-1028/2023	B.C. Centre for Disease Control	Public Health Agency of Canada	Himsworth, Chelsea; Prystajecky,Natalie; Tyson,John; Jassem,Agatha; Kuchinski,Kevin; Coombe, Michelle; Lee,Tracy; Azana,Rob; Fung,Janet; Chan,Michael; Cheung,Branco; Caleta,Jessica; Tsang,Frankie; Yang,Kevin; Russell,Shannon; Zlosnik,James; Hoang,Linda
EPI2856449	HA	Canada	2023-Nov-14	EPI_ISL_18665564	A/Mallard/BC/AIVPHL-1400/2023	B.C. Centre for Disease Control	Public Health Agency of Canada	Himsworth, Chelsea; Prystajecky,Natalie; Tyson,John; Jassem,Agatha; Kuchinski,Kevin; Coombe, Michelle; Lee,Tracy; Azana,Rob; Fung,Janet; Chan,Michael; Cheung,Branco; Caleta,Jessica; Tsang,Frankie; Yang,Kevin; Russell,Shannon; Zlosnik,James; Hoang,Linda
EPI2856439	HA	Canada	2023-Mar-20	EPI_ISL_18665563	A/Barn_Owl/BC/AIVPHL-1011/2023	B.C. Centre for Disease Control	Public Health Agency of Canada	Himsworth, Chelsea; Prystajecky,Natalie; Tyson,John; Jassem,Agatha; Kuchinski,Kevin; Coombe, Michelle; Lee,Tracy; Azana,Rob; Fung,Janet; Chan,Michael; Cheung,Branco; Caleta,Jessica; Tsang,Frankie; Yang,Kevin; Russell,Shannon; Zlosnik,James; Hoang,Linda
EPI2856438	HA	Canada	2023-Nov-27	EPI_ISL_18665562	A/Red_Tailed_Hawk/BC/AIVPHL-1454/2023	B.C. Centre for Disease Control	Public Health Agency of Canada	Himsworth, Chelsea; Prystajecky,Natalie; Tyson,John; Jassem,Agatha; Kuchinski,Kevin; Coombe, Michelle; Lee,Tracy; Azana,Rob; Fung,Janet; Chan,Michael; Cheung,Branco; Caleta,Jessica; Tsang,Frankie; Yang,Kevin; Russell,Shannon; Zlosnik,James; Hoang,Linda
EPI2856419	HA	Canada	2023-Nov-14	EPI_ISL_18665561	A/Wood_Duck/BC/AIVPHL-1399/2023	B.C. Centre for Disease Control	Public Health Agency of Canada	Himsworth, Chelsea; Prystajecky,Natalie; Tyson,John; Jassem,Agatha; Kuchinski,Kevin; Coombe, Michelle; Lee,Tracy; Azana,Rob; Fung,Janet; Chan,Michael; Cheung,Branco; Caleta,Jessica; Tsang,Frankie; Yang,Kevin; Russell,Shannon; Zlosnik,James; Hoang,Linda
EPI2856413	HA	Canada	2023-Mar-20	EPI_ISL_18665559	A/Red_Tailed_Hawk/BC/AIVPHL-1009/2023	B.C. Centre for Disease Control	Public Health Agency of Canada	Himsworth, Chelsea; Prystajecky,Natalie; Tyson,John; Jassem,Agatha; Kuchinski,Kevin; Coombe, Michelle; Lee,Tracy; Azana,Rob; Fung,Janet; Chan,Michael; Cheung,Branco; Caleta,Jessica; Tsang,Frankie; Yang,Kevin; Russell,Shannon; Zlosnik,James; Hoang,Linda
EPI2856396	HA	Canada	2023-Nov-14	EPI_ISL_18665558	A/Cackling_Goose/BC/AIVPHL-1398/2023	B.C. Centre for Disease Control	Public Health Agency of Canada	Himsworth, Chelsea; Prystajecky,Natalie; Tyson,John; Jassem,Agatha; Kuchinski,Kevin; Coombe, Michelle; Lee,Tracy; Azana,Rob; Fung,Janet; Chan,Michael; Cheung,Branco; Caleta,Jessica; Tsang,Frankie; Yang,Kevin; Russell,Shannon; Zlosnik,James; Hoang,Linda
EPI2856394	HA	Canada	2022-Dec-30	EPI_ISL_18665557	A/American_Crow/BC/AIVPHL-864/2022	B.C. Centre for Disease Control	Public Health Agency of Canada	Himsworth, Chelsea; Prystajecky,Natalie; Tyson,John; Jassem,Agatha; Kuchinski,Kevin; Coombe, Michelle; Lee,Tracy; Azana,Rob; Fung,Janet; Chan,Michael; Cheung,Branco; Caleta,Jessica; Tsang,Frankie; Yang,Kevin; Russell,Shannon; Zlosnik,James; Hoang,Linda
[truncated: 34,516 more rows]
