# Supplementary material for: Decoding non-human mammalian adaptive signatures of 2.3.4.4b H5N1 to assess its human adaptive potential
Source: Research Square preprint supplement (doi:10.21203/rs.3.rs-5157982/v1), 2024-10-04
Supplement: Supplementary file 4 [file e429f478eba69cc47f7851de.xlsx]

## Sheet: Sheet1
We gratefully acknowledge the authors, originating and submitting laboratories of the sequences from GISAID’s EpiFlu™ Database on which this research is based. The list is detailed below.
All submitters of data may be contacted directly via www.gisaid.org
Segment ID	Segment	Country	Collection date	Isolate-ID	Isolate name	Originating Lab	Submitting Lab	Authors
EPI2913244	HA	Chile	2023-Mar-19	EPI_ISL_18760069	A/sea lion/Valparaiso/SJCEIRR-2431361/2023	Center of Excellence for Influenza Research and Surveillance	Center of Excellence for Influenza Research and Surveillance	Pardo-Roa,C., Johow,M., Ariyama,N., Almonacid,L.I., Aguayo,C., Castillo,P.N., Munoz,G., Avila,C., Neira,V.; Medina,R.
EPI2873002	HA	Argentina	2023-Aug-11	EPI_ISL_18698755	A/Sea Lion/Argentina/3893-1/2023	Direcci√≥n del Laboratorio Animal, Direcci√≥n General de Laboratorios y Control T√©cnico, SENASA.	Instituto Nacional de Enfermedades Infecciosas Dr. C.G. Malbr√°n	Artuso, M.; Marchione, V.; Benedetti, E.; Chamorro, A.; Bonastre, P.; Alvarez, A.; Piccini, L.; Ponde, A.; Barrios, E.; Fabeiro, M.; Waisman, K.; Coppola, L.; Popklepovich, T.; Pontoriero, A.; Riva, D.
EPI2872994	HA	Argentina	2023-Aug-08	EPI_ISL_18698754	A/Sea Lion/Argentina/3849-4/2023	Direcci√≥n del Laboratorio Animal, Direcci√≥n General de Laboratorios y Control T√©cnico, SENASA.	Instituto Nacional de Enfermedades Infecciosas Dr. C.G. Malbr√°n	Artuso, M.; Marchione, V.; Benedetti, E.; Chamorro, A.; Bonastre, P.; Alvarez, A.; Piccini, L.; Ponde, A.; Barrios, E.; Fabeiro, M.; Waisman, K.; Coppola, L.; Popklepovich, T.; Pontoriero, A.; Riva, D.
EPI2609545	HA	Chile	2023-Mar-01	EPI_ISL_17885976	A/sea lion/Arica y Parinacota/240270-1/2023			Pardo-Roa,C., Johow,M., Ariyama,N., Almonacid,L.I., Navarro,C., Aguayo,C., Munoz,G., Fuentes-Lupichinni,E., Ulloa,M., Avila,C., Reyes,R., Neira,V.; Medina,R.
EPI2586381	HA	Peru	2023-Mar-07	EPI_ISL_17777532	A/sea_lion/Peru/TAC-INS-011/2023	Laboratorio de Virus Respiratorios, Centro Nacional de Salud Publica	Instituto Nacional de Salud Peru	Padilla-Rojas, C.; Sevilla-Casta?eda, L.; Hurtado-Vela, C.; Silva-Molina, J.; Huarca-Balbin, L.; Lizarraga-Olivares, W.; Jimenez-Vasquez, V.; Lope-Pari, P.; Alarcon, Y.; Cuquian, K.; Conza-Blanco, L.; Perez-Janampa, D.; Marcelo-Tantamango, O.; Yarleque-Javier, G.; Rojas-Serrano, N.; Arotinco-Garaygar, G.
EPI2586373	HA	Peru	2023-Mar-07	EPI_ISL_17777531	A/sea_lion/Peru/TAC-INS-010/2023	Laboratorio de Virus Respiratorios, Centro Nacional de Salud Publica	Instituto Nacional de Salud Peru	Padilla-Rojas, C.; Sevilla-Casta?eda, L.; Hurtado-Vela, C.; Silva-Molina, J.; Huarca-Balbin, L.; Lizarraga-Olivares, W.; Jimenez-Vasquez, V.; Lope-Pari, P.; Alarcon, Y.; Cuquian, K.; Conza-Blanco, L.; Perez-Janampa, D.; Marcelo-Tantamango, O.; Yarleque-Javier, G.; Rojas-Serrano, N.; Arotinco-Garaygar, G.
EPI3084230	HA	Argentina	2023-Aug-26	EPI_ISL_18945319	A/South American sea lion/Argentina/RN-PB007/2023	Instituto Nacional de Tecnologia Agropecuaria, Instituto de Virologia e Innovaciones Tecnologicas		Rimondi,A., Vanstreels,R.E.T., Olivera,V.S., Donini,A., Miqueo Lauriente,M.; Uhart,M.
EPI3084222	HA	Argentina	2023-Aug-26	EPI_ISL_18945317	A/South American sea lion/Argentina/RN-PB011/2023	Instituto Nacional de Tecnologia Agropecuaria, Instituto de Virologia e Innovaciones Tecnologicas		Rimondi,A., Vanstreels,R.E.T., Olivera,V.S., Donini,A., Miqueo Lauriente,M.; Uhart,M.
EPI3084214	HA	Argentina	2023-Aug-26	EPI_ISL_18945316	A/South American sea lion/Argentina/RN-PB013/2023	Instituto Nacional de Tecnologia Agropecuaria, Instituto de Virologia e Innovaciones Tecnologicas		Rimondi,A., Vanstreels,R.E.T., Olivera,V.S., Donini,A., Miqueo Lauriente,M.; Uhart,M.
EPI2745234	HA	Peru	2023-Jan-23	EPI_ISL_18265430	A/South American Sea Lion/Peru/LIM-SER036/2023	Servicio Nacional Forestal y de Fauna Silvestre (SERFOR)	Pontificia Universidad Catolica del Peru	Leguia,M.; Garcia-Glaessner,A.; Munoz-Saavedra,B.; Juarez,D.; Barrera,P.; Jara,J.; Silva,W.; Ploog,K.; Colchao-Claux,P.; Lescano,J.
EPI2745212	HA	Peru	2023-Feb-07	EPI_ISL_18265321	A/south american sea lion/Peru/AQP-SER00K/2023	Servicio Nacional Forestal y de Fauna Silvestre (SERFOR)	Pontificia Universidad Catolica del Peru	Leguia,M.; Garcia-Glaessner,A.; Munoz-Saavedra,B.; Juarez,D.; Barrera,P.; Jara,J.; Silva,W.; Ploog,K.; Colchao-Claux,P.; Lescano,J.
EPI2664269	HA	Peru	2023-Feb-07	EPI_ISL_18054509	A/sea lion/Peru/AQP-SER00K/2023			Leguia,M., Garcia-Glaessner,A., Munoz-Saavedra,B., Juarez,D., Barrera,P., Jara,J., Silva,W., Ploog,K., Colchao-Claux,P.; Lescano,J.
EPI2664215	HA	Peru	2023-Jan-23	EPI_ISL_18054502	A/Sea Lion/Peru/LIM-SER036/2023			Leguia,M., Garcia-Glaessner,A., Munoz-Saavedra,B., Juarez,D., Barrera,P., Jara,J., Silva,W., Ploog,K., Colchao-Claux,P.; Lescano,J.
EPI2913242	NA	Chile	2023-Mar-19	EPI_ISL_18760069	A/sea lion/Valparaiso/SJCEIRR-2431361/2023	Center of Excellence for Influenza Research and Surveillance	Center of Excellence for Influenza Research and Surveillance	Pardo-Roa,C., Johow,M., Ariyama,N., Almonacid,L.I., Aguayo,C., Castillo,P.N., Munoz,G., Avila,C., Neira,V.; Medina,R.
EPI2873001	NA	Argentina	2023-Aug-11	EPI_ISL_18698755	A/Sea Lion/Argentina/3893-1/2023	Direcci√≥n del Laboratorio Animal, Direcci√≥n General de Laboratorios y Control T√©cnico, SENASA.	Instituto Nacional de Enfermedades Infecciosas Dr. C.G. Malbr√°n	Artuso, M.; Marchione, V.; Benedetti, E.; Chamorro, A.; Bonastre, P.; Alvarez, A.; Piccini, L.; Ponde, A.; Barrios, E.; Fabeiro, M.; Waisman, K.; Coppola, L.; Popklepovich, T.; Pontoriero, A.; Riva, D.
EPI2872993	NA	Argentina	2023-Aug-08	EPI_ISL_18698754	A/Sea Lion/Argentina/3849-4/2023	Direcci√≥n del Laboratorio Animal, Direcci√≥n General de Laboratorios y Control T√©cnico, SENASA.	Instituto Nacional de Enfermedades Infecciosas Dr. C.G. Malbr√°n	Artuso, M.; Marchione, V.; Benedetti, E.; Chamorro, A.; Bonastre, P.; Alvarez, A.; Piccini, L.; Ponde, A.; Barrios, E.; Fabeiro, M.; Waisman, K.; Coppola, L.; Popklepovich, T.; Pontoriero, A.; Riva, D.
EPI2609544	NA	Chile	2023-Mar-01	EPI_ISL_17885976	A/sea lion/Arica y Parinacota/240270-1/2023			Pardo-Roa,C., Johow,M., Ariyama,N., Almonacid,L.I., Navarro,C., Aguayo,C., Munoz,G., Fuentes-Lupichinni,E., Ulloa,M., Avila,C., Reyes,R., Neira,V.; Medina,R.
EPI2586380	NA	Peru	2023-Mar-07	EPI_ISL_17777532	A/sea_lion/Peru/TAC-INS-011/2023	Laboratorio de Virus Respiratorios, Centro Nacional de Salud Publica	Instituto Nacional de Salud Peru	Padilla-Rojas, C.; Sevilla-Casta?eda, L.; Hurtado-Vela, C.; Silva-Molina, J.; Huarca-Balbin, L.; Lizarraga-Olivares, W.; Jimenez-Vasquez, V.; Lope-Pari, P.; Alarcon, Y.; Cuquian, K.; Conza-Blanco, L.; Perez-Janampa, D.; Marcelo-Tantamango, O.; Yarleque-Javier, G.; Rojas-Serrano, N.; Arotinco-Garaygar, G.
EPI2586372	NA	Peru	2023-Mar-07	EPI_ISL_17777531	A/sea_lion/Peru/TAC-INS-010/2023	Laboratorio de Virus Respiratorios, Centro Nacional de Salud Publica	Instituto Nacional de Salud Peru	Padilla-Rojas, C.; Sevilla-Casta?eda, L.; Hurtado-Vela, C.; Silva-Molina, J.; Huarca-Balbin, L.; Lizarraga-Olivares, W.; Jimenez-Vasquez, V.; Lope-Pari, P.; Alarcon, Y.; Cuquian, K.; Conza-Blanco, L.; Perez-Janampa, D.; Marcelo-Tantamango, O.; Yarleque-Javier, G.; Rojas-Serrano, N.; Arotinco-Garaygar, G.
EPI3084220	NA	Argentina	2023-Aug-26	EPI_ISL_18945317	A/South American sea lion/Argentina/RN-PB011/2023	Instituto Nacional de Tecnologia Agropecuaria, Instituto de Virologia e Innovaciones Tecnologicas		Rimondi,A., Vanstreels,R.E.T., Olivera,V.S., Donini,A., Miqueo Lauriente,M.; Uhart,M.
EPI3084212	NA	Argentina	2023-Aug-26	EPI_ISL_18945316	A/South American sea lion/Argentina/RN-PB013/2023	Instituto Nacional de Tecnologia Agropecuaria, Instituto de Virologia e Innovaciones Tecnologicas		Rimondi,A., Vanstreels,R.E.T., Olivera,V.S., Donini,A., Miqueo Lauriente,M.; Uhart,M.
EPI2745236	NA	Peru	2023-Jan-23	EPI_ISL_18265430	A/South American Sea Lion/Peru/LIM-SER036/2023	Servicio Nacional Forestal y de Fauna Silvestre (SERFOR)	Pontificia Universidad Catolica del Peru	Leguia,M.; Garcia-Glaessner,A.; Munoz-Saavedra,B.; Juarez,D.; Barrera,P.; Jara,J.; Silva,W.; Ploog,K.; Colchao-Claux,P.; Lescano,J.
EPI2745214	NA	Peru	2023-Feb-07	EPI_ISL_18265321	A/south american sea lion/Peru/AQP-SER00K/2023	Servicio Nacional Forestal y de Fauna Silvestre (SERFOR)	Pontificia Universidad Catolica del Peru	Leguia,M.; Garcia-Glaessner,A.; Munoz-Saavedra,B.; Juarez,D.; Barrera,P.; Jara,J.; Silva,W.; Ploog,K.; Colchao-Claux,P.; Lescano,J.
EPI2664267	NA	Peru	2023-Feb-07	EPI_ISL_18054509	A/sea lion/Peru/AQP-SER00K/2023			Leguia,M., Garcia-Glaessner,A., Munoz-Saavedra,B., Juarez,D., Barrera,P., Jara,J., Silva,W., Ploog,K., Colchao-Claux,P.; Lescano,J.
EPI2664213	NA	Peru	2023-Jan-23	EPI_ISL_18054502	A/Sea Lion/Peru/LIM-SER036/2023			Leguia,M., Garcia-Glaessner,A., Munoz-Saavedra,B., Juarez,D., Barrera,P., Jara,J., Silva,W., Ploog,K., Colchao-Claux,P.; Lescano,J.
EPI2913245	NP	Chile	2023-Mar-19	EPI_ISL_18760069	A/sea lion/Valparaiso/SJCEIRR-2431361/2023	Center of Excellence for Influenza Research and Surveillance	Center of Excellence for Influenza Research and Surveillance	Pardo-Roa,C., Johow,M., Ariyama,N., Almonacid,L.I., Aguayo,C., Castillo,P.N., Munoz,G., Avila,C., Neira,V.; Medina,R.
EPI2872995	NP	Argentina	2023-Aug-11	EPI_ISL_18698755	A/Sea Lion/Argentina/3893-1/2023	Direcci√≥n del Laboratorio Animal, Direcci√≥n General de Laboratorios y Control T√©cnico, SENASA.	Instituto Nacional de Enfermedades Infecciosas Dr. C.G. Malbr√°n	Artuso, M.; Marchione, V.; Benedetti, E.; Chamorro, A.; Bonastre, P.; Alvarez, A.; Piccini, L.; Ponde, A.; Barrios, E.; Fabeiro, M.; Waisman, K.; Coppola, L.; Popklepovich, T.; Pontoriero, A.; Riva, D.
EPI2872987	NP	Argentina	2023-Aug-08	EPI_ISL_18698754	A/Sea Lion/Argentina/3849-4/2023	Direcci√≥n del Laboratorio Animal, Direcci√≥n General de Laboratorios y Control T√©cnico, SENASA.	Instituto Nacional de Enfermedades Infecciosas Dr. C.G. Malbr√°n	Artuso, M.; Marchione, V.; Benedetti, E.; Chamorro, A.; Bonastre, P.; Alvarez, A.; Piccini, L.; Ponde, A.; Barrios, E.; Fabeiro, M.; Waisman, K.; Coppola, L.; Popklepovich, T.; Pontoriero, A.; Riva, D.
EPI2609546	NP	Chile	2023-Mar-01	EPI_ISL_17885976	A/sea lion/Arica y Parinacota/240270-1/2023			Pardo-Roa,C., Johow,M., Ariyama,N., Almonacid,L.I., Navarro,C., Aguayo,C., Munoz,G., Fuentes-Lupichinni,E., Ulloa,M., Avila,C., Reyes,R., Neira,V.; Medina,R.
EPI2586374	NP	Peru	2023-Mar-07	EPI_ISL_17777532	A/sea_lion/Peru/TAC-INS-011/2023	Laboratorio de Virus Respiratorios, Centro Nacional de Salud Publica	Instituto Nacional de Salud Peru	Padilla-Rojas, C.; Sevilla-Casta?eda, L.; Hurtado-Vela, C.; Silva-Molina, J.; Huarca-Balbin, L.; Lizarraga-Olivares, W.; Jimenez-Vasquez, V.; Lope-Pari, P.; Alarcon, Y.; Cuquian, K.; Conza-Blanco, L.; Perez-Janampa, D.; Marcelo-Tantamango, O.; Yarleque-Javier, G.; Rojas-Serrano, N.; Arotinco-Garaygar, G.
EPI2586366	NP	Peru	2023-Mar-07	EPI_ISL_17777531	A/sea_lion/Peru/TAC-INS-010/2023	Laboratorio de Virus Respiratorios, Centro Nacional de Salud Publica	Instituto Nacional de Salud Peru	Padilla-Rojas, C.; Sevilla-Casta?eda, L.; Hurtado-Vela, C.; Silva-Molina, J.; Huarca-Balbin, L.; Lizarraga-Olivares, W.; Jimenez-Vasquez, V.; Lope-Pari, P.; Alarcon, Y.; Cuquian, K.; Conza-Blanco, L.; Perez-Janampa, D.; Marcelo-Tantamango, O.; Yarleque-Javier, G.; Rojas-Serrano, N.; Arotinco-Garaygar, G.
EPI3084231	NP	Argentina	2023-Aug-26	EPI_ISL_18945319	A/South American sea lion/Argentina/RN-PB007/2023	Instituto Nacional de Tecnologia Agropecuaria, Instituto de Virologia e Innovaciones Tecnologicas		Rimondi,A., Vanstreels,R.E.T., Olivera,V.S., Donini,A., Miqueo Lauriente,M.; Uhart,M.
EPI3084223	NP	Argentina	2023-Aug-26	EPI_ISL_18945317	A/South American sea lion/Argentina/RN-PB011/2023	Instituto Nacional de Tecnologia Agropecuaria, Instituto de Virologia e Innovaciones Tecnologicas		Rimondi,A., Vanstreels,R.E.T., Olivera,V.S., Donini,A., Miqueo Lauriente,M.; Uhart,M.
EPI3084215	NP	Argentina	2023-Aug-26	EPI_ISL_18945316	A/South American sea lion/Argentina/RN-PB013/2023	Instituto Nacional de Tecnologia Agropecuaria, Instituto de Virologia e Innovaciones Tecnologicas		Rimondi,A., Vanstreels,R.E.T., Olivera,V.S., Donini,A., Miqueo Lauriente,M.; Uhart,M.
EPI2745235	NP	Peru	2023-Jan-23	EPI_ISL_18265430	A/South American Sea Lion/Peru/LIM-SER036/2023	Servicio Nacional Forestal y de Fauna Silvestre (SERFOR)	Pontificia Universidad Catolica del Peru	Leguia,M.; Garcia-Glaessner,A.; Munoz-Saavedra,B.; Juarez,D.; Barrera,P.; Jara,J.; Silva,W.; Ploog,K.; Colchao-Claux,P.; Lescano,J.
EPI2745213	NP	Peru	2023-Feb-07	EPI_ISL_18265321	A/south american sea lion/Peru/AQP-SER00K/2023	Servicio Nacional Forestal y de Fauna Silvestre (SERFOR)	Pontificia Universidad Catolica del Peru	Leguia,M.; Garcia-Glaessner,A.; Munoz-Saavedra,B.; Juarez,D.; Barrera,P.; Jara,J.; Silva,W.; Ploog,K.; Colchao-Claux,P.; Lescano,J.
EPI2664270	NP	Peru	2023-Feb-07	EPI_ISL_18054509	A/sea lion/Peru/AQP-SER00K/2023			Leguia,M., Garcia-Glaessner,A., Munoz-Saavedra,B., Juarez,D., Barrera,P., Jara,J., Silva,W., Ploog,K., Colchao-Claux,P.; Lescano,J.
EPI2664216	NP	Peru	2023-Jan-23	EPI_ISL_18054502	A/Sea Lion/Peru/LIM-SER036/2023			Leguia,M., Garcia-Glaessner,A., Munoz-Saavedra,B., Juarez,D., Barrera,P., Jara,J., Silva,W., Ploog,K., Colchao-Claux,P.; Lescano,J.
EPI2913243	PA	Chile	2023-Mar-19	EPI_ISL_18760069	A/sea lion/Valparaiso/SJCEIRR-2431361/2023	Center of Excellence for Influenza Research and Surveillance	Center of Excellence for Influenza Research and Surveillance	Pardo-Roa,C., Johow,M., Ariyama,N., Almonacid,L.I., Aguayo,C., Castillo,P.N., Munoz,G., Avila,C., Neira,V.; Medina,R.
EPI2872998	PA	Argentina	2023-Aug-11	EPI_ISL_18698755	A/Sea Lion/Argentina/3893-1/2023	Direcci√≥n del Laboratorio Animal, Direcci√≥n General de Laboratorios y Control T√©cnico, SENASA.	Instituto Nacional de Enfermedades Infecciosas Dr. C.G. Malbr√°n	Artuso, M.; Marchione, V.; Benedetti, E.; Chamorro, A.; Bonastre, P.; Alvarez, A.; Piccini, L.; Ponde, A.; Barrios, E.; Fabeiro, M.; Waisman, K.; Coppola, L.; Popklepovich, T.; Pontoriero, A.; Riva, D.
EPI2872990	PA	Argentina	2023-Aug-08	EPI_ISL_18698754	A/Sea Lion/Argentina/3849-4/2023	Direcci√≥n del Laboratorio Animal, Direcci√≥n General de Laboratorios y Control T√©cnico, SENASA.	Instituto Nacional de Enfermedades Infecciosas Dr. C.G. Malbr√°n	Artuso, M.; Marchione, V.; Benedetti, E.; Chamorro, A.; Bonastre, P.; Alvarez, A.; Piccini, L.; Ponde, A.; Barrios, E.; Fabeiro, M.; Waisman, K.; Coppola, L.; Popklepovich, T.; Pontoriero, A.; Riva, D.
EPI2637121	PA	Chile	2023-Mar-01	EPI_ISL_17885976	A/sea lion/Arica y Parinacota/240270-1/2023			Pardo-Roa,C., Johow,M., Ariyama,N., Almonacid,L.I., Navarro,C., Aguayo,C., Munoz,G., Fuentes-Lupichinni,E., Ulloa,M., Avila,C., Reyes,R., Neira,V.; Medina,R.
EPI2586377	PA	Peru	2023-Mar-07	EPI_ISL_17777532	A/sea_lion/Peru/TAC-INS-011/2023	Laboratorio de Virus Respiratorios, Centro Nacional de Salud Publica	Instituto Nacional de Salud Peru	Padilla-Rojas, C.; Sevilla-Casta?eda, L.; Hurtado-Vela, C.; Silva-Molina, J.; Huarca-Balbin, L.; Lizarraga-Olivares, W.; Jimenez-Vasquez, V.; Lope-Pari, P.; Alarcon, Y.; Cuquian, K.; Conza-Blanco, L.; Perez-Janampa, D.; Marcelo-Tantamango, O.; Yarleque-Javier, G.; Rojas-Serrano, N.; Arotinco-Garaygar, G.
EPI2586369	PA	Peru	2023-Mar-07	EPI_ISL_17777531	A/sea_lion/Peru/TAC-INS-010/2023	Laboratorio de Virus Respiratorios, Centro Nacional de Salud Publica	Instituto Nacional de Salud Peru	Padilla-Rojas, C.; Sevilla-Casta?eda, L.; Hurtado-Vela, C.; Silva-Molina, J.; Huarca-Balbin, L.; Lizarraga-Olivares, W.; Jimenez-Vasquez, V.; Lope-Pari, P.; Alarcon, Y.; Cuquian, K.; Conza-Blanco, L.; Perez-Janampa, D.; Marcelo-Tantamango, O.; Yarleque-Javier, G.; Rojas-Serrano, N.; Arotinco-Garaygar, G.
EPI3084229	PA	Argentina	2023-Aug-26	EPI_ISL_18945319	A/South American sea lion/Argentina/RN-PB007/2023	Instituto Nacional de Tecnologia Agropecuaria, Instituto de Virologia e Innovaciones Tecnologicas		Rimondi,A., Vanstreels,R.E.T., Olivera,V.S., Donini,A., Miqueo Lauriente,M.; Uhart,M.
EPI3084221	PA	Argentina	2023-Aug-26	EPI_ISL_18945317	A/South American sea lion/Argentina/RN-PB011/2023	Instituto Nacional de Tecnologia Agropecuaria, Instituto de Virologia e Innovaciones Tecnologicas		Rimondi,A., Vanstreels,R.E.T., Olivera,V.S., Donini,A., Miqueo Lauriente,M.; Uhart,M.
EPI3084213	PA	Argentina	2023-Aug-26	EPI_ISL_18945316	A/South American sea lion/Argentina/RN-PB013/2023	Instituto Nacional de Tecnologia Agropecuaria, Instituto de Virologia e Innovaciones Tecnologicas		Rimondi,A., Vanstreels,R.E.T., Olivera,V.S., Donini,A., Miqueo Lauriente,M.; Uhart,M.
EPI2745233	PA	Peru	2023-Jan-23	EPI_ISL_18265430	A/South American Sea Lion/Peru/LIM-SER036/2023	Servicio Nacional Forestal y de Fauna Silvestre (SERFOR)	Pontificia Universidad Catolica del Peru	Leguia,M.; Garcia-Glaessner,A.; Munoz-Saavedra,B.; Juarez,D.; Barrera,P.; Jara,J.; Silva,W.; Ploog,K.; Colchao-Claux,P.; Lescano,J.
EPI2745219	PA	Peru	2023-Mar-06	EPI_ISL_18265422	A/south american sea lion/Peru/AQP-SER00R/2023	Servicio Nacional Forestal y de Fauna Silvestre (SERFOR)	Pontificia Universidad Catolica del Peru	Leguia,M.; Garcia-Glaessner,A.; Munoz-Saavedra,B.; Juarez,D.; Barrera,P.; Jara,J.; Silva,W.; Ploog,K.; Colchao-Claux,P.; Lescano,J.
EPI2745211	PA	Peru	2023-Feb-07	EPI_ISL_18265321	A/south american sea lion/Peru/AQP-SER00K/2023	Servicio Nacional Forestal y de Fauna Silvestre (SERFOR)	Pontificia Universidad Catolica del Peru	Leguia,M.; Garcia-Glaessner,A.; Munoz-Saavedra,B.; Juarez,D.; Barrera,P.; Jara,J.; Silva,W.; Ploog,K.; Colchao-Claux,P.; Lescano,J.
EPI2664276	PA	Peru	2023-Mar-06	EPI_ISL_18054510	A/sea lion/Peru/AQP-SER00R/2023			Leguia,M., Garcia-Glaessner,A., Munoz-Saavedra,B., Juarez,D., Barrera,P., Jara,J., Silva,W., Ploog,K., Colchao-Claux,P.; Lescano,J.
EPI2664268	PA	Peru	2023-Feb-07	EPI_ISL_18054509	A/sea lion/Peru/AQP-SER00K/2023			Leguia,M., Garcia-Glaessner,A., Munoz-Saavedra,B., Juarez,D., Barrera,P., Jara,J., Silva,W., Ploog,K., Colchao-Claux,P.; Lescano,J.
EPI2664214	PA	Peru	2023-Jan-23	EPI_ISL_18054502	A/Sea Lion/Peru/LIM-SER036/2023			Leguia,M., Garcia-Glaessner,A., Munoz-Saavedra,B., Juarez,D., Barrera,P., Jara,J., Silva,W., Ploog,K., Colchao-Claux,P.; Lescano,J.
EPI2913246	PB1	Chile	2023-Mar-19	EPI_ISL_18760069	A/sea lion/Valparaiso/SJCEIRR-2431361/2023	Center of Excellence for Influenza Research and Surveillance	Center of Excellence for Influenza Research and Surveillance	Pardo-Roa,C., Johow,M., Ariyama,N., Almonacid,L.I., Aguayo,C., Castillo,P.N., Munoz,G., Avila,C., Neira,V.; Medina,R.
EPI2873000	PB1	Argentina	2023-Aug-11	EPI_ISL_18698755	A/Sea Lion/Argentina/3893-1/2023	Direcci√≥n del Laboratorio Animal, Direcci√≥n General de Laboratorios y Control T√©cnico, SENASA.	Instituto Nacional de Enfermedades Infecciosas Dr. C.G. Malbr√°n	Artuso, M.; Marchione, V.; Benedetti, E.; Chamorro, A.; Bonastre, P.; Alvarez, A.; Piccini, L.; Ponde, A.; Barrios, E.; Fabeiro, M.; Waisman, K.; Coppola, L.; Popklepovich, T.; Pontoriero, A.; Riva, D.
EPI2872992	PB1	Argentina	2023-Aug-08	EPI_ISL_18698754	A/Sea Lion/Argentina/3849-4/2023	Direcci√≥n del Laboratorio Animal, Direcci√≥n General de Laboratorios y Control T√©cnico, SENASA.	Instituto Nacional de Enfermedades Infecciosas Dr. C.G. Malbr√°n	Artuso, M.; Marchione, V.; Benedetti, E.; Chamorro, A.; Bonastre, P.; Alvarez, A.; Piccini, L.; Ponde, A.; Barrios, E.; Fabeiro, M.; Waisman, K.; Coppola, L.; Popklepovich, T.; Pontoriero, A.; Riva, D.
EPI2609547	PB1	Chile	2023-Mar-01	EPI_ISL_17885976	A/sea lion/Arica y Parinacota/240270-1/2023			Pardo-Roa,C., Johow,M., Ariyama,N., Almonacid,L.I., Navarro,C., Aguayo,C., Munoz,G., Fuentes-Lupichinni,E., Ulloa,M., Avila,C., Reyes,R., Neira,V.; Medina,R.
EPI2586379	PB1	Peru	2023-Mar-07	EPI_ISL_17777532	A/sea_lion/Peru/TAC-INS-011/2023	Laboratorio de Virus Respiratorios, Centro Nacional de Salud Publica	Instituto Nacional de Salud Peru	Padilla-Rojas, C.; Sevilla-Casta?eda, L.; Hurtado-Vela, C.; Silva-Molina, J.; Huarca-Balbin, L.; Lizarraga-Olivares, W.; Jimenez-Vasquez, V.; Lope-Pari, P.; Alarcon, Y.; Cuquian, K.; Conza-Blanco, L.; Perez-Janampa, D.; Marcelo-Tantamango, O.; Yarleque-Javier, G.; Rojas-Serrano, N.; Arotinco-Garaygar, G.
EPI3084232	PB1	Argentina	2023-Aug-26	EPI_ISL_18945319	A/South American sea lion/Argentina/RN-PB007/2023	Instituto Nacional de Tecnologia Agropecuaria, Instituto de Virologia e Innovaciones Tecnologicas		Rimondi,A., Vanstreels,R.E.T., Olivera,V.S., Donini,A., Miqueo Lauriente,M.; Uhart,M.
EPI3084224	PB1	Argentina	2023-Aug-26	EPI_ISL_18945317	A/South American sea lion/Argentina/RN-PB011/2023	Instituto Nacional de Tecnologia Agropecuaria, Instituto de Virologia e Innovaciones Tecnologicas		Rimondi,A., Vanstreels,R.E.T., Olivera,V.S., Donini,A., Miqueo Lauriente,M.; Uhart,M.
EPI3084216	PB1	Argentina	2023-Aug-26	EPI_ISL_18945316	A/South American sea lion/Argentina/RN-PB013/2023	Instituto Nacional de Tecnologia Agropecuaria, Instituto de Virologia e Innovaciones Tecnologicas		Rimondi,A., Vanstreels,R.E.T., Olivera,V.S., Donini,A., Miqueo Lauriente,M.; Uhart,M.
EPI2745232	PB1	Peru	2023-Jan-23	EPI_ISL_18265430	A/South American Sea Lion/Peru/LIM-SER036/2023	Servicio Nacional Forestal y de Fauna Silvestre (SERFOR)	Pontificia Universidad Catolica del Peru	Leguia,M.; Garcia-Glaessner,A.; Munoz-Saavedra,B.; Juarez,D.; Barrera,P.; Jara,J.; Silva,W.; Ploog,K.; Colchao-Claux,P.; Lescano,J.
EPI2745217	PB1	Peru	2023-Mar-06	EPI_ISL_18265422	A/south american sea lion/Peru/AQP-SER00R/2023	Servicio Nacional Forestal y de Fauna Silvestre (SERFOR)	Pontificia Universidad Catolica del Peru	Leguia,M.; Garcia-Glaessner,A.; Munoz-Saavedra,B.; Juarez,D.; Barrera,P.; Jara,J.; Silva,W.; Ploog,K.; Colchao-Claux,P.; Lescano,J.
EPI2745210	PB1	Peru	2023-Feb-07	EPI_ISL_18265321	A/south american sea lion/Peru/AQP-SER00K/2023	Servicio Nacional Forestal y de Fauna Silvestre (SERFOR)	Pontificia Universidad Catolica del Peru	Leguia,M.; Garcia-Glaessner,A.; Munoz-Saavedra,B.; Juarez,D.; Barrera,P.; Jara,J.; Silva,W.; Ploog,K.; Colchao-Claux,P.; Lescano,J.
EPI2664279	PB1	Peru	2023-Mar-06	EPI_ISL_18054510	A/sea lion/Peru/AQP-SER00R/2023			Leguia,M., Garcia-Glaessner,A., Munoz-Saavedra,B., Juarez,D., Barrera,P., Jara,J., Silva,W., Ploog,K., Colchao-Claux,P.; Lescano,J.
EPI2664271	PB1	Peru	2023-Feb-07	EPI_ISL_18054509	A/sea lion/Peru/AQP-SER00K/2023			Leguia,M., Garcia-Glaessner,A., Munoz-Saavedra,B., Juarez,D., Barrera,P., Jara,J., Silva,W., Ploog,K., Colchao-Claux,P.; Lescano,J.
EPI2664217	PB1	Peru	2023-Jan-23	EPI_ISL_18054502	A/Sea Lion/Peru/LIM-SER036/2023			Leguia,M., Garcia-Glaessner,A., Munoz-Saavedra,B., Juarez,D., Barrera,P., Jara,J., Silva,W., Ploog,K., Colchao-Claux,P.; Lescano,J.
EPI2913248	PB2	Chile	2023-Mar-19	EPI_ISL_18760069	A/sea lion/Valparaiso/SJCEIRR-2431361/2023	Center of Excellence for Influenza Research and Surveillance	Center of Excellence for Influenza Research and Surveillance	Pardo-Roa,C., Johow,M., Ariyama,N., Almonacid,L.I., Aguayo,C., Castillo,P.N., Munoz,G., Avila,C., Neira,V.; Medina,R.
EPI2872999	PB2	Argentina	2023-Aug-11	EPI_ISL_18698755	A/Sea Lion/Argentina/3893-1/2023	Direcci√≥n del Laboratorio Animal, Direcci√≥n General de Laboratorios y Control T√©cnico, SENASA.	Instituto Nacional de Enfermedades Infecciosas Dr. C.G. Malbr√°n	Artuso, M.; Marchione, V.; Benedetti, E.; Chamorro, A.; Bonastre, P.; Alvarez, A.; Piccini, L.; Ponde, A.; Barrios, E.; Fabeiro, M.; Waisman, K.; Coppola, L.; Popklepovich, T.; Pontoriero, A.; Riva, D.
EPI2872991	PB2	Argentina	2023-Aug-08	EPI_ISL_18698754	A/Sea Lion/Argentina/3849-4/2023	Direcci√≥n del Laboratorio Animal, Direcci√≥n General de Laboratorios y Control T√©cnico, SENASA.	Instituto Nacional de Enfermedades Infecciosas Dr. C.G. Malbr√°n	Artuso, M.; Marchione, V.; Benedetti, E.; Chamorro, A.; Bonastre, P.; Alvarez, A.; Piccini, L.; Ponde, A.; Barrios, E.; Fabeiro, M.; Waisman, K.; Coppola, L.; Popklepovich, T.; Pontoriero, A.; Riva, D.
EPI2609549	PB2	Chile	2023-Mar-01	EPI_ISL_17885976	A/sea lion/Arica y Parinacota/240270-1/2023			Pardo-Roa,C., Johow,M., Ariyama,N., Almonacid,L.I., Navarro,C., Aguayo,C., Munoz,G., Fuentes-Lupichinni,E., Ulloa,M., Avila,C., Reyes,R., Neira,V.; Medina,R.
EPI2586378	PB2	Peru	2023-Mar-07	EPI_ISL_17777532	A/sea_lion/Peru/TAC-INS-011/2023	Laboratorio de Virus Respiratorios, Centro Nacional de Salud Publica	Instituto Nacional de Salud Peru	Padilla-Rojas, C.; Sevilla-Casta?eda, L.; Hurtado-Vela, C.; Silva-Molina, J.; Huarca-Balbin, L.; Lizarraga-Olivares, W.; Jimenez-Vasquez, V.; Lope-Pari, P.; Alarcon, Y.; Cuquian, K.; Conza-Blanco, L.; Perez-Janampa, D.; Marcelo-Tantamango, O.; Yarleque-Javier, G.; Rojas-Serrano, N.; Arotinco-Garaygar, G.
EPI3084234	PB2	Argentina	2023-Aug-26	EPI_ISL_18945319	A/South American sea lion/Argentina/RN-PB007/2023	Instituto Nacional de Tecnologia Agropecuaria, Instituto de Virologia e Innovaciones Tecnologicas		Rimondi,A., Vanstreels,R.E.T., Olivera,V.S., Donini,A., Miqueo Lauriente,M.; Uhart,M.
EPI3084226	PB2	Argentina	2023-Aug-26	EPI_ISL_18945317	A/South American sea lion/Argentina/RN-PB011/2023	Instituto Nacional de Tecnologia Agropecuaria, Instituto de Virologia e Innovaciones Tecnologicas		Rimondi,A., Vanstreels,R.E.T., Olivera,V.S., Donini,A., Miqueo Lauriente,M.; Uhart,M.
EPI3084218	PB2	Argentina	2023-Aug-26	EPI_ISL_18945316	A/South American sea lion/Argentina/RN-PB013/2023	Instituto Nacional de Tecnologia Agropecuaria, Instituto de Virologia e Innovaciones Tecnologicas		Rimondi,A., Vanstreels,R.E.T., Olivera,V.S., Donini,A., Miqueo Lauriente,M.; Uhart,M.
EPI2745231	PB2	Peru	2023-Jan-23	EPI_ISL_18265430	A/South American Sea Lion/Peru/LIM-SER036/2023	Servicio Nacional Forestal y de Fauna Silvestre (SERFOR)	Pontificia Universidad Catolica del Peru	Leguia,M.; Garcia-Glaessner,A.; Munoz-Saavedra,B.; Juarez,D.; Barrera,P.; Jara,J.; Silva,W.; Ploog,K.; Colchao-Claux,P.; Lescano,J.
EPI2745218	PB2	Peru	2023-Mar-06	EPI_ISL_18265422	A/south american sea lion/Peru/AQP-SER00R/2023	Servicio Nacional Forestal y de Fauna Silvestre (SERFOR)	Pontificia Universidad Catolica del Peru	Leguia,M.; Garcia-Glaessner,A.; Munoz-Saavedra,B.; Juarez,D.; Barrera,P.; Jara,J.; Silva,W.; Ploog,K.; Colchao-Claux,P.; Lescano,J.
EPI2745209	PB2	Peru	2023-Feb-07	EPI_ISL_18265321	A/south american sea lion/Peru/AQP-SER00K/2023	Servicio Nacional Forestal y de Fauna Silvestre (SERFOR)	Pontificia Universidad Catolica del Peru	Leguia,M.; Garcia-Glaessner,A.; Munoz-Saavedra,B.; Juarez,D.; Barrera,P.; Jara,J.; Silva,W.; Ploog,K.; Colchao-Claux,P.; Lescano,J.
EPI2664281	PB2	Peru	2023-Mar-06	EPI_ISL_18054510	A/sea lion/Peru/AQP-SER00R/2023			Leguia,M., Garcia-Glaessner,A., Munoz-Saavedra,B., Juarez,D., Barrera,P., Jara,J., Silva,W., Ploog,K., Colchao-Claux,P.; Lescano,J.
EPI2664273	PB2	Peru	2023-Feb-07	EPI_ISL_18054509	A/sea lion/Peru/AQP-SER00K/2023			Leguia,M., Garcia-Glaessner,A., Munoz-Saavedra,B., Juarez,D., Barrera,P., Jara,J., Silva,W., Ploog,K., Colchao-Claux,P.; Lescano,J.
EPI2664219	PB2	Peru	2023-Jan-23	EPI_ISL_18054502	A/Sea Lion/Peru/LIM-SER036/2023			Leguia,M., Garcia-Glaessner,A., Munoz-Saavedra,B., Juarez,D., Barrera,P., Jara,J., Silva,W., Ploog,K., Colchao-Claux,P.; Lescano,J.
